# Supplementary material for: Exploring the Roles of Ribosomal Peptides in Prokaryote-Phage Interactions through Deep Learning-Enabled Metagenome Mining
Source: Research Square preprint supplement (doi:10.21203/rs.3.rs-3594555/v1), 2023-12-07
Supplement: Supplementary file 2 [file 60064c469c4ee1bd172bb6bc.xlsx]

## Sheet: README
Supplementary Data 1	training data
dataset	Train/test split of data. Sequences in the training set that have >90% identity to the sequences in the set are discarded.
Supplementary Data 2	The CDD id and description used in this study for the detection of PTM enzymes around RiPP-encoding genes
Supplementary Data 3	The information of predicted RiPP precursors
RiPP family	RiPP precursors were divided into different RiPP families based on sequence similarity
contigs/genomes	RiPP-encoding contigs or genomes
description	RiPP precursor gene description from prodigal
sequence	RiPP precursor sequence
RiPP class	RiPP subclasses included in this study: AUTO_INDUCING_PEPTIDE,BACTERIAL_HEAD_TO_TAIL_CYCLIZED,CYANOBACTIN,LANTHIPEPTIDE,LASSO_PEPTIDE,rSAM_MODIFIED_RiPP,THIOPEPTIDE,GRASPETIDE,OTHER
PTM	whether the RiPP family have at least one member with PTM
source	RiPP-encoding contigs or genomes used in this study were 'complete' (NCBI RefSeq complete genomes), 'draft' (NCBI RefSeq draft genomes), 'metagenome' (global ocean metagenome), 'MAR' (The MAR database, Marine Metagenomics Portal)
Supplementary Data 4	The output of iNEXT for the rarefaction analysis of MAR and metagenomes
Supplementary Data 5	The output of iNEXT for the rarefaction analysis of different ecosystems, including Marine, Engineered, Host-associated, Non-Marine-Aquatic and Terrestrial
Supplementary Data 6	The co-abundance analysis of transcripts; The node and edge were used for the visualization of Cytoscape
node size	The number of proteins hit the Pfam domain
abundance	The aggregate abundance of transcripts of the Pfam domain
prevalence	The prevalence of the Pfam domain in the metatranscriptomic samples
annotation1	biosynthetic-related annotation
annotation2	MGE-related annotation
Supplementary Data 7	The co-abundance analysis of genes; The node and edge were used for the visualization of Cytoscape
node size	The number of proteins hit the Pfam domain
abundance	The aggregate abundance of genes of the Pfam domain
prevalence	The prevalence of the Pfam domain in the metagenomic samples
annotation1	biosynthetic-related annotation
annotation2	MGE-related annotation
Supplementary Data 8	The source of marine MAGs/SAGs/scaffolds in this study
Supplementary Data 9	1289 ocean MAGs selected from GEM database. The original table was downloaded from https://www.nature.com/articles/s41587-020-0718-6#Sec21, Supplementary Tables 1

## Sheet: Supplementary Data 1
C	class	length	dataset
METLVNLFFKFFTSIMEFVGLVAGANPCAGYFDEPEVPDELTKLYE	AUTO_INDUCING_PEPTIDE	46	training set
MKNILKILSLKFTSNICTRMALSVSASACHWSAYQPEEPKCLRDIKNH	AUTO_INDUCING_PEPTIDE	48	training set
MFKRFKTQILSSLASFVAVVAFSGVSATSMWIFYEPDIPKALKDK	AUTO_INDUCING_PEPTIDE	45	training set
MMQIINLLFKVITAVFEKIGFIAGYSTCSYYFDEPEVPKELLEIYKK	AUTO_INDUCING_PEPTIDE	47	training set
MKKLNKNLLTLFAALTTVVATTVATSACLWFTHQPEEPKSLRDE	AUTO_INDUCING_PEPTIDE	44	test set
MRKSRNKILMLVATAMTVVASTVASAACYWAFYQPEEPKSLRDE	AUTO_INDUCING_PEPTIDE	44	training set
MKKLNSKFLALIATLTTIVAASVATSACSWFSYQPEEPKCLRDE	AUTO_INDUCING_PEPTIDE	44	test set
MKKQLKEKCTKITAKLLKSVAYSTADSACHVSLYQPKEPKSLRK	AUTO_INDUCING_PEPTIDE	44	training set
MKKLNKKVLMLVAIFTTLLASIVASSACYWCVYQPKEPKCLREE	AUTO_INDUCING_PEPTIDE	44	training set
MNIFESILTIFAKFFTFIGTISSVKPCTGFVDEPEIPKELTDLYK	AUTO_INDUCING_PEPTIDE	45	test set
MNIFESILNLFAKFFSVLGVIAGAKPCGGFFDEPEVPSEITKLYE	AUTO_INDUCING_PEPTIDE	45	training set
MKKKILMSLAAISTFIASIVATSACTWYFYQPEEPECLRDK	AUTO_INDUCING_PEPTIDE	41	training set
MNKYSLKILKCLSLLSLVTALMSVNTTCTWFNHQPNLPDDLRKFKSYGK	AUTO_INDUCING_PEPTIDE	49	training set
MRILEVLFNLITNLFQSIGTFARIPTSTGFFDEPEIPAELLEEEK	AUTO_INDUCING_PEPTIDE	45	training set
MTVLLDLIIKLFTFLLQSIGTIASFTPCTTYFDEPEVPEELTNAK	AUTO_INDUCING_PEPTIDE	45	training set
MKSFFNNILKNIGSSAIAAVSLSANSTSAWISHQPKIPSGIEKFKKNIS	AUTO_INDUCING_PEPTIDE	49	training set
MKLVNLLLSSTTSFLQMVGNRQKAKTCTVLYDEPEVPKELTQELEK	AUTO_INDUCING_PEPTIDE	46	training set
MKKIQHMFAEGLTKLFVVVGGLSVHNFCVLYSFEPTIPEELKK	AUTO_INDUCING_PEPTIDE	43	test set
MNTLFNLFFDFITGILKNIGNIAAYSTCDFIMDEVEVPKELTQ	AUTO_INDUCING_PEPTIDE	43	training set
MKKLSKKVLMLVATFTTLLASIVASSACVWCVYQPEEPKCLREE	AUTO_INDUCING_PEPTIDE	44	training set
MKNLKKSLLSKTTKVVGSLSLFLAAIVIVPTSTGGAYQPKCPDEFLK	AUTO_INDUCING_PEPTIDE	47	training set
MKNRILMSIATLATIIASIMATSACWYGHYQPQEPKCLREE	AUTO_INDUCING_PEPTIDE	41	training set
MNKIFYKFMKFFGGVAIAIAFISANTTSVWYINQPKMPKSLKKKL	AUTO_INDUCING_PEPTIDE	45	training set
MIMEGLFNLFIKFFTMIFEFIGFVAGANPCASYFDEPEVPKELSKLYE	AUTO_INDUCING_PEPTIDE	48	training set
MLKKYLLSMGKVVAFVSFLFAVFNANTACAFIYHQPELPDEVKRLRKF	AUTO_INDUCING_PEPTIDE	48	training set
MIRKVLLKTASDVCKKMAYEVSASACIWGTYQPKEPKCLKKIKKD	AUTO_INDUCING_PEPTIDE	45	training set
MKNLKKSLLSKTMKVVGSLSLFLAAIVIVPTSTGGAYQPKCPDEFLK	AUTO_INDUCING_PEPTIDE	47	training set
MKKVMSIVLKQVGNVADKTLSLSANTTSTWIAHQAKVPESLKNLKKYK	AUTO_INDUCING_PEPTIDE	48	training set
MKKLSKRALMLVATFTTLLASIVASSACVWCVYQPEEPKCLKEE	AUTO_INDUCING_PEPTIDE	44	training set
MKFLDSLLKLLTSVFASISTYAKYPFCIGYFYEPEIPAELLEEE	AUTO_INDUCING_PEPTIDE	44	training set
MKKLSKRVLMLVATFTTLLASIVASSACYWCVYQPKEPKCLREE	AUTO_INDUCING_PEPTIDE	44	training set
MKKQLKEKCTKVTAKLLKSVAYSTADSACHLGIYQPKEPKSLRK	AUTO_INDUCING_PEPTIDE	44	training set
MKKILYNFMKACGVLAMFVAFLSANTTSLWHVYQPKTPEKLKNSKNHQKEGNN	AUTO_INDUCING_PEPTIDE	53	training set
MKNKLKRTVKDVSKSLFKRVAFSTSASACYNSFYQPKEPKCLQKK	AUTO_INDUCING_PEPTIDE	45	training set
MKKSKKRLITIIAAVATIVATSVASSACAWFLYQPEEPKCLIEE	AUTO_INDUCING_PEPTIDE	44	training set
MKKLNTKFLALVATITTLVAASVSTSACLWFSYQPEEPKCLREE	AUTO_INDUCING_PEPTIDE	44	training set
MKNKVFGLVATVATALAVLMSTSACFLFVNQPEEPMCLREE	AUTO_INDUCING_PEPTIDE	41	training set
MKSRLYSLSVKFGSLAAAMMAVFSVISVKTACMWLTYQPEEPEEIRALKKR	AUTO_INDUCING_PEPTIDE	51	training set
MTFITDLFIKLFSLILETVGTLASYNVCGGYFDEPEVPKELTDLNR	AUTO_INDUCING_PEPTIDE	46	training set
MKKQLKEKCIKVTAKFLKSVAYSTADSACVAGIYQPKEPKSLRK	AUTO_INDUCING_PEPTIDE	44	training set
MKKFIVRFMKFASSLALSTAILSANSTCPWIIHQPKVPKEISNLKKTN	AUTO_INDUCING_PEPTIDE	48	training set
MKKSLKKVAANLSAKVLKSFALSTSASACAVGFYQPKEPKCLREK	AUTO_INDUCING_PEPTIDE	45	training set
MKKLLDKSMKCVGDMAMSVANLSANKTCLWYSYQPKVPKKLKSPK	AUTO_INDUCING_PEPTIDE	45	training set
MNTLVNMFFDFIIKLAKAIGIVGGVNACSSLFDESKVPAELTNLYDK	AUTO_INDUCING_PEPTIDE	47	training set
MNVIKSISKSISKSISNYFAKVFASIGSISTINPCFGYTDESEIPKELTDLYE	AUTO_INDUCING_PEPTIDE	53	training set
MEFLVNLFFKFFTSIMEFVGFVAGANPCAMFYDEPEVPSELTKLYE	AUTO_INDUCING_PEPTIDE	46	training set
MKKYLLKLVKYAGNIAIFTVLLSANTTCSWFIHQPEVPKAVKDLKR	AUTO_INDUCING_PEPTIDE	46	training set
MKKTLLKIAAKAAEKSAVKSANTACLVFTYQPKAPKGIKSFKK	AUTO_INDUCING_PEPTIDE	43	training set
MIMNSLFNLIFKFFTMIFEFIGFVAGANPCQLYYDEPEVPEELSKLYE	AUTO_INDUCING_PEPTIDE	48	training set
MKKQLKEKCVKVTAKFLKSVAYSTADSACVAGIYQPKEPKSLRK	AUTO_INDUCING_PEPTIDE	44	training set
MKISKKLLSVIAVISTAVASLVSASACAWYLYQPEEPESLREK	AUTO_INDUCING_PEPTIDE	43	training set
MNTLVNMFFDFIIKLAKAIGIVGGVNACSSLFDETKVPAELTNLYDK	AUTO_INDUCING_PEPTIDE	47	training set
MKNIKNLLVSRSMKIAGFVALFLGTIVITPASTLGSHQPKCPDEFLK	AUTO_INDUCING_PEPTIDE	47	training set
MNLLSSLFSKSVSNILSAIGEKAVIRGCNVFLDETKVPQELLNENNK	AUTO_INDUCING_PEPTIDE	47	training set
MKKLSKKVLMLVATFTTLLASIVASSACYWCVYQPKEPKCLREE	AUTO_INDUCING_PEPTIDE	44	training set
MEKIALKLLKNMSELSFRTAVLSANSASSWIAHQAKEPQALQKLKK	AUTO_INDUCING_PEPTIDE	46	training set
MKKIGFKLLKKLSMLSFGIAVLSANSASTWFIHQPKEPKELEQLKKRK	AUTO_INDUCING_PEPTIDE	48	training set
MNTLLNIFFDFITGILKNIGNVASYSTCYFIMDEVEIPKELTQLHE	AUTO_INDUCING_PEPTIDE	46	training set
MKKLNKKFLGLIATITTLMAALVANSACNWYLYQPEEPECLREN	AUTO_INDUCING_PEPTIDE	44	training set
MKRRILMVVATAATLIASIVSTSACIWGHYQPEEPKCLREE	AUTO_INDUCING_PEPTIDE	41	training set
MKKLNKKFLALIATITTLMATTVATSACTWYFYQPEEPKCLSEE	AUTO_INDUCING_PEPTIDE	44	training set
MAFFESVLKLFTIFFKTLGNFAAWDPCTGYFDEPEIPQELREAK	AUTO_INDUCING_PEPTIDE	44	training set
MDLLTKLIEFITGFFKSIGSFADIPLCRVFFDEPEIPRELLDLDE	AUTO_INDUCING_PEPTIDE	45	training set
MKERMFKLLGHLFQYVGAKQLVMCCTGLLFEVKIPDELKSKD	AUTO_INDUCING_PEPTIDE	42	training set
MKKFIVRFMKFASSLALSTAILSANSTCPWIIHQPKVPKEISNLKKKN	AUTO_INDUCING_PEPTIDE	48	training set
MEFLFNFVLNIFTKIFETIGLVAGANPCVMYYDEPEVPEELSKIYE	AUTO_INDUCING_PEPTIDE	46	training set
MATLINLFLNLFTFIIERVGNVAAYSLCSLWYDEPEVPEELTKLHE	AUTO_INDUCING_PEPTIDE	46	training set
MKKLLVRLFTGWGSQNLVMCCGGFMDEPEMPKELLEELK	AUTO_INDUCING_PEPTIDE	39	training set
MFKTVKTNLLRFASALFLLVAATGASTACWFHWYQPKVPEK	AUTO_INDUCING_PEPTIDE	41	training set
MKNMNNKVGKFLSKKLEEQSMKVADSSMSKACFMFVYEPKSPFVKMQEKKENK	AUTO_INDUCING_PEPTIDE	53	training set
MKKYLSKFMKNLGTLAISAALISNYTTCSWFIHQPKVPNNVKKLKK	AUTO_INDUCING_PEPTIDE	46	training set
MTFITDLFIKLFSLILETVGTLATYSTCYGYFDESEVPEELTNLER	AUTO_INDUCING_PEPTIDE	46	training set
MKKKVMMLVATIATLFASLVATSACFWGYYQPEEPKCLRDE	AUTO_INDUCING_PEPTIDE	41	training set
MKKFFVKFMKFASSLALSTAILSANSTCPWIIHQPKVPKEIKNLKKIN	AUTO_INDUCING_PEPTIDE	48	training set
MLVATFTTLLASVVASSACVWCVYQPEEPKCLREE	AUTO_INDUCING_PEPTIDE	35	training set
METLVNLFLKFFTSIMEFVGLVAGANPCSAYFDEPEVPEELSQLFE	AUTO_INDUCING_PEPTIDE	46	training set
MKTKILMGIATVATVMASIVSTSACFWAHYQPEEPKSLREE	AUTO_INDUCING_PEPTIDE	41	training set
MNTLFNLFFDFITGILKNIGNIAAYSTCDFIMDEVEVPKELTQLHE	AUTO_INDUCING_PEPTIDE	46	training set
MKKLINMFIDILVDFFNSIGYRAALINCDFLLDEAEVPKELTQLHE	AUTO_INDUCING_PEPTIDE	46	training set
MRNLLNRYLSNLMTFGLEKVATGAATKCCYFILHQPKVPENLKKFSESKK	AUTO_INDUCING_PEPTIDE	50	test set
MKKFIVKFMKFASSLALSTAILSANSTCPWIIHQPKVPEEIKTLKKKN	AUTO_INDUCING_PEPTIDE	48	training set
MDLLNGIFKLFAFIFEKIGNLAKYNPCLGFLDEPTVPKELLEEDK	AUTO_INDUCING_PEPTIDE	45	training set
MKNKILMSVATIATVIASVVATSACIWGHYQPEEPKCLREK	AUTO_INDUCING_PEPTIDE	41	training set
MKKQLKEKCIMVTAKLLKSVAYSTADSACYVSAYQPKEPKSLKK	AUTO_INDUCING_PEPTIDE	44	training set
MKKRIIKGILGLGAVLFTSIALTTSAYACFFFMYQPEEPKCLREE	AUTO_INDUCING_PEPTIDE	45	training set
MIMNSLFNLIFKFFTVIFEFIGFVAGANPCQLYYDEPEVPEELSKLYE	AUTO_INDUCING_PEPTIDE	48	training set
MKKIQNMFAEGLTKLFVAVGGLSVHNFCVLYSFEPTIPEELKK	AUTO_INDUCING_PEPTIDE	43	discard
MNTLVNMFFDFIIKLAKAIGIVGGVNACSSLFDEPKVPAELTNLYDK	AUTO_INDUCING_PEPTIDE	47	training set
MKQKMYEAIAHLFKYVGAKQLVMCCVGIWFETKIPDELRK	AUTO_INDUCING_PEPTIDE	40	training set
MKNMNKSVGKFLSRKLEEKSMKVADSSMSKACFMFVYEPKSPFVKMQEKNENK	AUTO_INDUCING_PEPTIDE	53	training set
MTFITDLFIKLFSLILETVGTLASYSPCATYFDEPEVPEELTNLER	AUTO_INDUCING_PEPTIDE	46	training set
MNLLSSLFSKSVSNILSAIGEKAVIRGCNVFLDETEVPQELLNENNK	AUTO_INDUCING_PEPTIDE	47	training set
MRILEVLFNLITNLFQSIGTFARIPISTGFFDEPEIPAELLEEDK	AUTO_INDUCING_PEPTIDE	45	training set
MNTLFNLLFELITGILKNIGNIAAYSTCDFIMDEVEVPKELTQLHE	AUTO_INDUCING_PEPTIDE	46	training set
MNLLSGLFTKGISVIFEFIGNFSVQDMCNGYFDEPEVPQELIDLHRN	AUTO_INDUCING_PEPTIDE	47	test set
MKKVLNVVLKNIGSLAVFVLSLSANTTSGWIAHQPEVPEEIKKFKNI	AUTO_INDUCING_PEPTIDE	47	training set
MNIFESLFNLIAKLFTVIGTIAGAKPCGGWLDEPEVPKEITDLYE	AUTO_INDUCING_PEPTIDE	45	training set
MKLINIFFKILITSFSILGKQSGVYPCGGWWDEPEVPKEITDLHK	AUTO_INDUCING_PEPTIDE	45	training set
MKKQLKEKCTKITAKLLKSVAYSTADSACVYGFYQPKEPKSLRK	AUTO_INDUCING_PEPTIDE	44	training set
MKRINHKLLMTLAAVATLFASFTASSACMWAFYQPEEPKSLREE	AUTO_INDUCING_PEPTIDE	44	training set
MNFLNSIFSFFAKFFEVLGAVSGVNPCSGFFDEPEVPEELTKLYE	AUTO_INDUCING_PEPTIDE	45	training set
MKKIALNLLKNISALSFGIAVLSANSASSWVAHQAKEPQALQKLKK	AUTO_INDUCING_PEPTIDE	46	training set
MKKYLTSILKYVGSISAFAVSLSANTTSTWISHQPKVPEGVRKFKKIN	AUTO_INDUCING_PEPTIDE	48	training set
MKKFSKGFFTLAAAALTLLATNVASTACNWFLYQPEEPESLREE	AUTO_INDUCING_PEPTIDE	44	training set
MKKCIVKFMQFASSLALSTAVLSANSTCPWIIHQPKVPEEISNLKKIN	AUTO_INDUCING_PEPTIDE	48	training set
MKRLNNKVLMAVAAFATVIASVVSTSACFWAMYQPEEPKALRDE	AUTO_INDUCING_PEPTIDE	44	training set
MKNKVLMLVATFATVIASIVATSACIWSHYQPEEPKCLRDE	AUTO_INDUCING_PEPTIDE	41	training set
MKKGLKKVAIDLSAKILKSCALSTSASACSFGFYQPKEPKCLREK	AUTO_INDUCING_PEPTIDE	45	training set
MNTLVNMFFDFIIKLAKAIGIVGGVNACSSLFDEPKVPAELTNL	AUTO_INDUCING_PEPTIDE	44	training set
MKKYLLKIMKYSGTLAVAMALFSQNTTCIGYIHQPKVPSSVKNLKNINNINNNIN	AUTO_INDUCING_PEPTIDE	55	training set
MNLLNSFFSFFAKFFELIGTVAGINPCSGWFDEPEVPEELTKLYE	AUTO_INDUCING_PEPTIDE	45	test set
MIMDALFNLVLKFFTIIFEFIGFVAGANPCALYYDEPEVPDELSKLYE	AUTO_INDUCING_PEPTIDE	48	training set
MKNILKILSLKFTSNICTRMALSVSASACHWSAYQPEEPKCLRDIKNN	AUTO_INDUCING_PEPTIDE	48	training set
MKNKILMTVATVATFMASLVATSACFFSHYQPEEPNCLREE	AUTO_INDUCING_PEPTIDE	41	training set
MRILEVLFNLITNLFQSIGTFAKIPTSTGFFDEPEIPEELLEEDK	AUTO_INDUCING_PEPTIDE	45	training set
MNTLVNLFFELIIKLAKAIGIVGGVNACSSLFDEPKVPAELTNLYDK	AUTO_INDUCING_PEPTIDE	47	training set
MNTLVNMFFDFIIKLAKTIGIVGGVNACSSLFDEPKVPAELTNLYDK	AUTO_INDUCING_PEPTIDE	47	training set
MKKVIGVTLKQVGELAKCTLSISANTTSNWIAHQPKIPESIKKFKKR	AUTO_INDUCING_PEPTIDE	47	test set
MNTLFNLFFDFITGVLKNIGNIAAYSTCDFIMDEVEVPKELTQLHE	AUTO_INDUCING_PEPTIDE	46	training set
MKKLGNKVLMAVAAIATVAASVVATSACLWYSYQPEEPKCLEEN	AUTO_INDUCING_PEPTIDE	44	training set
MFIYEVFVNLITKIFSALGTIAAINPCMGYFDEPEVPKEISKLYE	AUTO_INDUCING_PEPTIDE	45	training set
MAIFETLFNLFTALFKTLGNFAAMDPCTGFFDEPEVPQELRETE	AUTO_INDUCING_PEPTIDE	44	training set
MKKLSKRVLMLVATFTTLLASIVASSACVWCVYQPEEPKCLKEE	AUTO_INDUCING_PEPTIDE	44	training set
MKNKIYGVIAVVVTSLAVLMSTSACFFFINQPEEPTCLRGE	AUTO_INDUCING_PEPTIDE	41	training set
MKKKICSFITRFGGTMAALALVVATMTANSTCAWLAYQPEEPEEVKMLKKD	AUTO_INDUCING_PEPTIDE	51	training set
MTFITQLFIKLFSFFLETIGNIATINTCGGYFDEPEVPQELTDLKK	AUTO_INDUCING_PEPTIDE	46	test set
MKRLLYRLLPAAFSVLAFAAAIGVKPTCVFFFHQPEVPRSLRK	AUTO_INDUCING_PEPTIDE	43	training set
MNNILKNFLLKLTSNICRRMALRVSASACGWGLYQPEEPKCLRDIKNY	AUTO_INDUCING_PEPTIDE	48	training set
MENIFNLFIKFFTTILEFIGTVAGDSVCASYFDEPEVPEELTKLYE	AUTO_INDUCING_PEPTIDE	46	training set
MENIFNLFIKIFTTILEFVGTVAGDSVCASYFDEPEVPEELTKLYE	AUTO_INDUCING_PEPTIDE	46	training set
MNLLAGLFSKTISNVLSAIGEKAVIRGCTAFLDETEVPAELLKEKQ	AUTO_INDUCING_PEPTIDE	46	training set
MDLLNGIFKLFAFIFEKIGNLAKYNPCWGYFDETEVPRELLEEDN	AUTO_INDUCING_PEPTIDE	45	training set
MTFITDLFIKLFSLILETVGTLASYSPCATYFDEPEVPKELTNLER	AUTO_INDUCING_PEPTIDE	46	training set
MKNKVLMSVATIATFIASIVATSACFWGHYQPEEPKSLREE	AUTO_INDUCING_PEPTIDE	41	training set
MTVLVDLIIKLFTFLLQSIGTIASFTPCTTYFDEPEVPEELTNAK	AUTO_INDUCING_PEPTIDE	45	training set
MDILNSIFSFFAKFFEVLGAVSGVNPCSGWFDEPEVPEELTKLYE	AUTO_INDUCING_PEPTIDE	45	training set
MTVLFDLFIKFFSFLLESVGTLASYTPCATYFDEPEVPEELTNLKR	AUTO_INDUCING_PEPTIDE	46	training set
MKFLKSSLTKKSMKMIGSLALFLGGIVLVPTSLVSGHQPKCPDELLK	AUTO_INDUCING_PEPTIDE	47	training set
MKKQLKEKCVKVTAKLLRSVAYSAADSACVVGIYQPKEPKSLRK	AUTO_INDUCING_PEPTIDE	44	training set
MKKFIVRFMKFASSLALNTAILSANSTCPWIIHQPKVPKEISNLKKKN	AUTO_INDUCING_PEPTIDE	48	training set
MNTLVNMFFDFIIKLAKAIGIVGGVNACSSLFDEPKVPAELTNLYGK	AUTO_INDUCING_PEPTIDE	47	training set
MKKIALNLLKNISALSFGIAVLSANSASSWVAHQAKEPKALQKLKK	AUTO_INDUCING_PEPTIDE	46	training set
MKNKILMSVATIATFIASVVATSACIWGHYQPEEPKCLREE	AUTO_INDUCING_PEPTIDE	41	training set
MKKIALNLLKNISALSFGIAILSANSASSWVAHQAKEPQALQKLKK	AUTO_INDUCING_PEPTIDE	46	training set
MNIIKSISKSISNYFAKVFASIGSISTINPCFGFTDESEIPKELTDLYE	AUTO_INDUCING_PEPTIDE	49	training set
MEFLVNLFFKFFTSIMEFVGFVAGYSPCTNFFDEPEVPSELTKIYE	AUTO_INDUCING_PEPTIDE	46	training set
MKNMNKSVGKFLSRKLEEQSMKVADSSMSKACFMFVYEPKSPFVKMQEKNENK	AUTO_INDUCING_PEPTIDE	53	training set
MKKKVLMSLAAISTLVASLVATSACYWCFYQPEEPKSLREE	AUTO_INDUCING_PEPTIDE	41	training set
MKRLFTKGSLTLLAYLALFVGTTVISTTSVYYTHQPKCPEELLK	AUTO_INDUCING_PEPTIDE	44	training set
MKNLKENVLKKSMKVVGDLSLFLSKISMSPTCQAGCYQPKCPDELLK	AUTO_INDUCING_PEPTIDE	47	training set
MKQKMYEVVAHIFKYVGAKQLVMCCVGIWFETKIPDELRK	AUTO_INDUCING_PEPTIDE	40	training set
MKKILYHFMKACGVLAMFVAFLSANTTSLWHVYQPKTPEKLKKF	AUTO_INDUCING_PEPTIDE	44	test set
MTFITDLFIKLFSLILETVGTLASQTVCSGYFDEPEVPKELTNLKR	AUTO_INDUCING_PEPTIDE	46	training set
MKKLLDKSMKCVGGMAMSVANLSANKTCLWYNHQPKVPKKLKSPK	AUTO_INDUCING_PEPTIDE	45	training set
MVKTINSKILFAAAAVATVFAGLVASSACLWSFYQPEEPECLSDK	AUTO_INDUCING_PEPTIDE	45	training set
MKSKILMGIATIATVFASIVATSACWYVHYQPEEPKCLRDE	AUTO_INDUCING_PEPTIDE	41	training set
MNLLATLFSKSASNFLSSFGEKAVIRGCTAFLDETEVPAELLKEKQ	AUTO_INDUCING_PEPTIDE	46	training set
MHIFESIFSIIAKFFTVLGAVAGARPCYGYFDETEVPKEITELYE	AUTO_INDUCING_PEPTIDE	45	training set
MKNMLLKLSGIVASLALVITAFNSNSACVFLVHQPELPDEAKKLSKF	AUTO_INDUCING_PEPTIDE	47	training set
MKNMNKTVGKFLSKKLEEQSMKVADSSMSKACFMFVYEPKSPFVKMQEKNENK	AUTO_INDUCING_PEPTIDE	53	training set
MKNSNKKVLSLISAITTKAAEDLSNSTCVTALYQPKEPKSLQKK	AUTO_INDUCING_PEPTIDE	44	training set
MKKILKKAAVNLSAKVLKSFAISTSASACSVSFYQPKEPKCLREK	AUTO_INDUCING_PEPTIDE	45	training set
MNIIKSISKSISNYFAKVFASIGSISTVNPCFGFTDESEIPKELTDIYE	AUTO_INDUCING_PEPTIDE	49	training set
MNTLLNLFFNLITGILKNIGNVASYSTCYFIMDEVEIPKELTQLHE	AUTO_INDUCING_PEPTIDE	46	training set
MKKLLNKVIELLVDFFNSIGYRAAYMNCDFLLDEAEVPKELTQIHE	AUTO_INDUCING_PEPTIDE	46	training set
MNTLINLFFNFIIKIAEAIGIVGGVNACSSLFDEPKVPTELTKLYDK	AUTO_INDUCING_PEPTIDE	47	training set
MNKILYKIMKFFGGVAIAIAFISANTTSVWYINQPKMPKSLKKKL	AUTO_INDUCING_PEPTIDE	45	training set
MNNIFKILLLKLTSNICTRMALSVSASACHWGLYQPEEPKCLRDINNH	AUTO_INDUCING_PEPTIDE	48	training set
MKKRILILLSSILTLVALSGAASACTATLYQPELPEALKK	AUTO_INDUCING_PEPTIDE	40	training set
MKKLLDKSMKCVGDVAMSVANLSANKTCLWYNHQPKVPKKLKSPK	AUTO_INDUCING_PEPTIDE	45	training set
MNLLGGLFLKIFSNFMAVIGNAAKYNPCASYLDEPQVPEELTKLDE	AUTO_INDUCING_PEPTIDE	46	training set
MDILNGIFKFFAFIFEQLGNIAKYNPCAGYFDEPEVPKELLEENK	AUTO_INDUCING_PEPTIDE	45	training set
MNLLSSLFSKSVSNILSAIGEKAVIRGCTAFLDETEVPAELLKEKQ	AUTO_INDUCING_PEPTIDE	46	training set
MKKQLKEKCVKVTAKLLKSVAYSTADSACVFGAYQPKEPKSLRK	AUTO_INDUCING_PEPTIDE	44	training set
MKKGLVLKVMTLAAVMLSFLATTTTASACWWGMYQPEEPKSLREE	AUTO_INDUCING_PEPTIDE	45	training set
MKKRLLTLLASVATVVAAVVASSACFIFFYQPEEPKCLREE	AUTO_INDUCING_PEPTIDE	41	test set
MKKLNKKVLMLVATFTTLLASIVASSACYWCVYQPKEPKCLREE	AUTO_INDUCING_PEPTIDE	44	training set
MKKQLKEKCTKVTAKLLKSVAYSTADSACYASFYQPKEPKALKK	AUTO_INDUCING_PEPTIDE	44	test set
MKKITRTIFTLAAAILTFAAMTSVANACAMIFYQPQVPAALREE	AUTO_INDUCING_PEPTIDE	44	training set
MRNMNRSVGNFLSRKLEEKSMKVADSSMSKACFMFVYEPKSPFVKMQEKNENK	AUTO_INDUCING_PEPTIDE	53	training set
MNTLLNIFFDFITGVLKNIGNVASYSTCYFIMDEVEIPKELTQLHE	AUTO_INDUCING_PEPTIDE	46	training set
MKSAKKSILKTVAKVGAKSAEIGASSASILGFHQPKEPKALQNLKK	AUTO_INDUCING_PEPTIDE	46	test set
MKRLSKRILMLVATFTTLLASIVASSACYWCVYQPKEPKCLREE	AUTO_INDUCING_PEPTIDE	44	training set
MKKLSKKVLMLVATFTTLLASVVASSACVWCVYQPEEPKCLREE	AUTO_INDUCING_PEPTIDE	44	training set
MHIFESIFSLIAKFFSTLGAVAGLRPCGGYFDEPEVPKEITELYE	AUTO_INDUCING_PEPTIDE	45	training set
MNIFTSILTIFVKFFSLIGTISSVRPCGGFVDEPEVPKELTKLYE	AUTO_INDUCING_PEPTIDE	45	training set
MKEKMYKVLSHLFQYVGTKQLVMCCHGILFETKIPDELKSKD	AUTO_INDUCING_PEPTIDE	42	training set
MEFLVNLFFKFFTSILEFVGFVAGANPCAMFYDEPEVPSELTKLYE	AUTO_INDUCING_PEPTIDE	46	training set
MKKQLKEKCTKVTAKLLKSVAYSTADSACYVSAYQPKEPKSLRK	AUTO_INDUCING_PEPTIDE	44	training set
MHIFESIFSLIAKFFSTLGAVAGLSPCGGYFDEPEVPKEITDLYE	AUTO_INDUCING_PEPTIDE	45	training set
MTNVKKLLTAKVMKVVGSVALFLGTIVIVPTSTMSFHQPKCPDELLK	AUTO_INDUCING_PEPTIDE	47	training set
MNTLVNMFFDFIIKLAKAIGIVGGVNACSSLFDEPKVPAEL	AUTO_INDUCING_PEPTIDE	41	training set
MRRKMVKWAFSLAAAALTVFASINVASACVWTWYQPELPKALREK	AUTO_INDUCING_PEPTIDE	45	training set
MDILNGIFKFFAFIFEQIGNIAKYNPCVGYFDEPEVPSELLDEQK	AUTO_INDUCING_PEPTIDE	45	training set
MKKLSKRVLMLAATFTTLLASIVASSACVWCVYQPEEPKCLKEE	AUTO_INDUCING_PEPTIDE	44	training set
MKKKLLIVVAAVTTVVASVIASSACVFFFYQPEEPKCLQKR	AUTO_INDUCING_PEPTIDE	41	training set
MKNKLMKGIVTLGASIFTVIAFATSASACGWGFYQPKEPKCLREK	AUTO_INDUCING_PEPTIDE	45	training set
MKFLDSLLKLLTNVFASISTYAKYPLCIGYFYEPEIPDELLEEEE	AUTO_INDUCING_PEPTIDE	45	training set
MKNQVNKLLTKLSASICTKMALSVSASACSVSTFQPKEPKCLRK	AUTO_INDUCING_PEPTIDE	44	training set
MKKQLKEKCTKVTAKLLKSVAYSTADSACVYGFYQPKEPKSLRK	AUTO_INDUCING_PEPTIDE	44	training set
MHIFESIINLFVKFFSVLGAVSGGKVCSAYFDEPEVPKEITDLYK	AUTO_INDUCING_PEPTIDE	45	training set
MNLLGGLLLKIFSNFMAVIGNASKYNPCVMYLDEPQVPEELTKLDE	AUTO_INDUCING_PEPTIDE	46	training set
MRILEVLFNLITNLFQSIGTFAKYPTSTGFFDEPEIPAELLEEDK	AUTO_INDUCING_PEPTIDE	45	training set
MNLLSSLFSKSVSNILSAIGEKAVIRGCMAFLDETEVPAELLKEKQ	AUTO_INDUCING_PEPTIDE	46	training set
MTVLFDLFIKFFSFLLESVGTLASYTPCATYFDEPEVPEELTNLNR	AUTO_INDUCING_PEPTIDE	46	training set
MKNKLKEKCTKVTAKLLKSVAYSTADSACMYGFYQPKEPKSLRK	AUTO_INDUCING_PEPTIDE	44	training set
MKRLSKRVLMLVATFTTLLASIVASSACYWCVYQPKEPKCLREE	AUTO_INDUCING_PEPTIDE	44	training set
MKLLDSLLKLLTNIFASISTYAKYPLCIGYFYEPEIPAELLEEE	AUTO_INDUCING_PEPTIDE	44	training set
MKKLNKNLLTVFAALTTVIATAVATSACIWFTHQPEEPKSLRDE	AUTO_INDUCING_PEPTIDE	44	discard
MNLLSGLFTKGISAIFEFIGNFSAQDICNAYFDEPEVPQELIDLQRK	AUTO_INDUCING_PEPTIDE	47	training set
MKKTLLNKAMALFAGLFTFFALATSASACVWCYYQPEEPKALREE	AUTO_INDUCING_PEPTIDE	45	training set
MAFFDSLLNLVTISFKSLGNFAKINPCTVFFDEPEVPEELRQGE	AUTO_INDUCING_PEPTIDE	44	training set
MNTLLNIFFDFITGVLKNIGSVASYSTCYFIMDEVEIPKELTQLHE	AUTO_INDUCING_PEPTIDE	46	training set
MGKLSSKVLEYIGKLSICTLKISANTTCNWISHQPKIPDGFSKFKNR	AUTO_INDUCING_PEPTIDE	47	training set
MKRLNNKILMAVATFATVIASVVATSACFWAVYQPEEPKALRDE	AUTO_INDUCING_PEPTIDE	44	training set
MKKLNNKVLMALATVATVVAGTVATSACFWCFHQPEEPKSLREE	AUTO_INDUCING_PEPTIDE	44	training set
MNTLINMFFDFIIKLAKAIGIVGGVNACSSLFDEPKVPAELTNLYDK	AUTO_INDUCING_PEPTIDE	47	training set
MFIYEVFINLITKIFSALGTIAAINPCMGYFDEPEVPKEISELHE	AUTO_INDUCING_PEPTIDE	45	training set
MAFFESLLNLLTSVFKSLGNFAKINPCTVFFDEPEVPKELRESE	AUTO_INDUCING_PEPTIDE	44	test set
MKKLSKRILMLVATFTTLLASIVASSACVWCVYQPEEPKCLKEE	AUTO_INDUCING_PEPTIDE	44	training set
MNIFSIFAKVLADVFSKIGTFGSIRICYGFFDEAEVPQELIDEANK	AUTO_INDUCING_PEPTIDE	46	training set
MKRLNNKILMAVAAFATVIASVVSTSACLWSMYQPEEPKALRDE	AUTO_INDUCING_PEPTIDE	44	training set
MKKLLNKVIELLVDFFNSIGYRAAYINCDFLLDEAEVPKELTQLHE	AUTO_INDUCING_PEPTIDE	46	training set
MNLLGGLLLKIFSNFMAVIGNASKYNPCSNYLDEPQVPEELTKLDE	AUTO_INDUCING_PEPTIDE	46	training set
MKTIKKLLTVKAMKAIGTAALFLGTLVIVPTSTLSGHQPKCPDELLK	AUTO_INDUCING_PEPTIDE	47	training set
MKMMQIFDLLFKVISFIFEKIGFLAGYRTCNTYFDEPEVPKELFETYQK	AUTO_INDUCING_PEPTIDE	49	training set
MKNMNKSVGKFLSRKLEEQSMKVADSSMSKACFMFVYEPKSPFVKMQEKKRK	AUTO_INDUCING_PEPTIDE	52	training set
MNKILYKFMKFFGGVAIAIAFISANTTSVWYINQPKMPKSLKKKL	AUTO_INDUCING_PEPTIDE	45	training set
MNILDSLLNLATKFFSALGASVGARPCGGFFDEPEVPAEITELHK	AUTO_INDUCING_PEPTIDE	45	test set
MKRKILMVVATAATLIASIVSTSACIWGHYQPEEPKCLREE	AUTO_INDUCING_PEPTIDE	41	training set
MKNKILMGIATFATVIASVVATSACIWGHYQPEEPKCLRDE	AUTO_INDUCING_PEPTIDE	41	training set
MTVLFYLFIKFFSFLLESVGTLASYTPCATYFDEPEVPEELTNLKR	AUTO_INDUCING_PEPTIDE	46	training set
METLVNLFLKFFTSIMEFVGLVAGANPCAAYFDEPEVPEELSKLFE	AUTO_INDUCING_PEPTIDE	46	training set
MNLLGGLLLKLFSNFMAVIGNAAKYNPCASYLDEPQVPEELTKLDE	AUTO_INDUCING_PEPTIDE	46	training set
MKKLNKNLLTLFAALTTVVATTVATSACIWFTHQPEEPKSLRDE	AUTO_INDUCING_PEPTIDE	44	discard
MRKTKSKVLSLFAVLTTVIASMVASSACFWYYYQPEEPEILRDK	AUTO_INDUCING_PEPTIDE	44	training set
MTFITQLFIKLFSLILETVGTLASYSPCATYFDEPEVPEELTNLER	AUTO_INDUCING_PEPTIDE	46	training set
MKKLNKNLLTLFAALTTVIATTVATSACIWFTHQPEEPKSLRDE	AUTO_INDUCING_PEPTIDE	44	discard
MMKKLNSKLLMGIATLATVFAGVMATSACFWCNYQPEEPKSLREE	AUTO_INDUCING_PEPTIDE	45	training set
MKDRMFKLLGHLFQYVGGKQLVMCCTGLLFEVKIPDELKSKD	AUTO_INDUCING_PEPTIDE	42	training set
MFKTVKTNLLRFASALFLLVAATGASTTCWFHWYQPKVPEKG	AUTO_INDUCING_PEPTIDE	42	training set
MNNIFRTLLIKFTSNICERMALRVSASACSWGAYQPEEPKCLRDIKNH	AUTO_INDUCING_PEPTIDE	48	training set
MKKQLKEKCVKVTAKLLKSVAYSAADSACVVGIYQPKEPKSLRK	AUTO_INDUCING_PEPTIDE	44	training set
MSKKLLNLLASAAKSGADFASTNACIMLTYQPKMPDKLKKQK	AUTO_INDUCING_PEPTIDE	42	training set
MKKQLKEKCVKVTAKFLKSVAYSAADSACVVGIYQPKEPKSLRK	AUTO_INDUCING_PEPTIDE	44	training set
MKKKILMGIAAVATVFASVISTSACYFSFYQPEEPECLREE	AUTO_INDUCING_PEPTIDE	41	training set
MKKLNKKILMLVATFTTLLASIVASSACYWCVYQPKEPKCLREE	AUTO_INDUCING_PEPTIDE	44	training set
MKKKLFMTVATVATLVASFVATSACWACFYQPEEPKSLRDE	AUTO_INDUCING_PEPTIDE	41	training set
MRFKHWFLGLVATVAMVVAATGIYPASWGLWYQPEVPEELRK	AUTO_INDUCING_PEPTIDE	42	training set
MKKKICSFITRFGGTMAALALVVATMTANSTCFWLSYQPEEPEEVKMLKKD	AUTO_INDUCING_PEPTIDE	51	training set
MKKLIMKFSGVIATLALMVTTLNVNAACTFYAYQPELPDGAEKLRKF	AUTO_INDUCING_PEPTIDE	47	training set
MRNLLNRYLSNLMSFGLERVATGAATKCCYFILHQPKVPENLKKFSESKK	AUTO_INDUCING_PEPTIDE	50	discard
MNKSVGKFLSRKLEEQSMKVADSSMSKACFMFVYEPKSPFVKMQEKNENK	AUTO_INDUCING_PEPTIDE	50	training set
MKKKILMTIATAATVFASIIATSACVFAIYQPEEPKCLRDE	AUTO_INDUCING_PEPTIDE	41	training set
MKKFSKRTLMLVATFSTLLASMVASSACVWCVYQPEEPKCLREK	AUTO_INDUCING_PEPTIDE	44	test set
MKKQLKEKCTKVTAKLLKSIAYSTADSACHVSFYQPKEPKSLRK	AUTO_INDUCING_PEPTIDE	44	training set
MKKIISRFFIFTVTTLLFLASVTAASACYFSSYQPEVPEALRK	AUTO_INDUCING_PEPTIDE	43	training set
MKRNLMKLSTRMGKVFAALALLVTVSNVNSTCLFITHQPELPADSKKLRKF	AUTO_INDUCING_PEPTIDE	51	test set
MKKLSVVMGNVVSALALKSAVVTSNLACGYIYYQPEMPKEAKKLRKF	AUTO_INDUCING_PEPTIDE	47	training set
MRKEVRKMKKMKNTILKKLASASKFAAVKAAGSTSWGGCHQPKEPEAVRKLRKS	AUTO_INDUCING_PEPTIDE	54	training set
MLYVAATLGIPETLAVTIVNIILTGSTIVSIIIALTSILTAGVSAIILEGGWTAFINLVKSKVAQLGLRGTILW	BACTERIAL_HEAD_TO_TAIL_CYCLIZED	74	training set
MDLFHVASKLSISKGVAAGVVSTVLNAGTLITAIGAVTVALSGGIDAILEVGWATFVATVKEQAAKRGTAGAVAW	BACTERIAL_HEAD_TO_TAIL_CYCLIZED	75	training set
MTETRNEIKLHVLFGALAVGFLMLALFSFSLQVLPVADLAKEFGIPGSVAAVVLNVVEAGGAVTTIVSILTAVGSGGLSLIAAAGKETIRQYLKNEIKKKGRKAVIAW	BACTERIAL_HEAD_TO_TAIL_CYCLIZED	108	training set
MTKATDSKFYALLSLSLLAVTLIALVIGNGSLIAANLGVSTGTAFTIVNFLDAWSSVATVITIVGMFTGVGTISAGVAASILAIIKKKEKSKAAAF	BACTERIAL_HEAD_TO_TAIL_CYCLIZED	96	training set
MTKATDSRFYVLLSLSLLAVTSVALVIGNGSLIAANLGVSTGTAFTIVNFLDTWSSVATVITIVGMFTGVGTISAGVAASILAILKKKGKAKAAAF	BACTERIAL_HEAD_TO_TAIL_CYCLIZED	96	training set
MSLLALVAGTLGVSQSIATTVVSIVLTGSTLISIILGITAILSGGVDAILEIGWSTFVATVKKIVAERGKAAAIAW	BACTERIAL_HEAD_TO_TAIL_CYCLIZED	76	training set
MKSKRMEFHNKFLIVSAMLAVISWLSLGVVSFPMLAGTLGISTKAAATVVNLISVYSTVTAVISIVGAITGVGSIGSGIAATVLYILKKKGAAKAALW	BACTERIAL_HEAD_TO_TAIL_CYCLIZED	98	training set
MDKKQNLTSFQELTTTELNQIIGGGWWEDFLYRFNIIEQKNTKGFYQPIQL	BACTERIAL_HEAD_TO_TAIL_CYCLIZED	51	test set
MKSKRMEFHNKFLIVSAMLAVISWLSLGVVSFPMLAGTLGVSTKAAATVVNLISAYSTVTAVISIVGAITGVGSIGSGIAATVLYILKKKGAAKAALW	BACTERIAL_HEAD_TO_TAIL_CYCLIZED	98	training set
MVRTQNITRLALTAMLGALALVATTLVLGTLPMADLAQQFGIPSAVGGTILNLATAGGTAATIVGILVGLGSGGLGLLAAAGRETIKQFLLNEIKKKGRKAVIAW	BACTERIAL_HEAD_TO_TAIL_CYCLIZED	105	test set
MTKSYTNKFELNTLELALLFLILGSCLLYFSVNVYWVADQFGIHLATGTLRKLIDAVGSGSSLAGAYAAIAGITIPAWAAAAIGAMGATAA	BACTERIAL_HEAD_TO_TAIL_CYCLIZED	91	training set
MSLLALVAGTLGVSQTIATTVVSIVLTGSTLISIILGITAILSGGVDAILEIGWSAFVATVKKIVAERGKAAAIAW	BACTERIAL_HEAD_TO_TAIL_CYCLIZED	76	training set
MKIKKVLAGTLGLGVVGSVLTLNQFSGSGLANLTLQYDISAVNAGRIVSALEWASDMGAVIGLAGAILGAGIGAAAISAAVAIAKRKLLKEGKKAAVLY	BACTERIAL_HEAD_TO_TAIL_CYCLIZED	99	training set
MLLVAATLGIPETIATTVVNIILTGSTIVSIIIALTSILTAGISAILAEGGWVAFVNLVKSKVAQLGLRGAILW	BACTERIAL_HEAD_TO_TAIL_CYCLIZED	74	test set
MSLLALVAGTLGVSQSIATTVVSIVLTGSTLISIILGITAILSGGVDVILEIGWSAFVATVKKIVAERGKAAAIAW	BACTERIAL_HEAD_TO_TAIL_CYCLIZED	76	training set
MVKENKFSKIFILMALSFLGLALFSASLQFLPIAHMAKEFGIPAAVAGTVLNVVEAGGWVTTIVSILTAVGSGGLSLLAAAGRESIKAYLKKEIKKKGKRAVIAW	BACTERIAL_HEAD_TO_TAIL_CYCLIZED	105	training set
MQKITKVGTSLKTVVFFGTATLLLTALASLPNIAGMLGLSTNAAATVYNIFNTYGNIAMALSVIAAVTGVGTIGSAAAASIMYVIKKKAKAKAIAF	BACTERIAL_HEAD_TO_TAIL_CYCLIZED	96	training set
MTKATDSKFYALLSLSLLAVTSLALVIGNGSLIAANLGVSTGTAFTIVNFLDTWSSVATVITIVGMFTGVGTISAGVAASILAILKKKGKAKAAAF	BACTERIAL_HEAD_TO_TAIL_CYCLIZED	96	training set
MDILLELAGYTGIASGTAKKVVDAIDKGAAAFVIISIISTVISAGALGAVSASADFIILTVKNYISRNLKAQAVIW	BACTERIAL_HEAD_TO_TAIL_CYCLIZED	76	training set
MDKKQNLTSFQELTTTELNQIIGGGWWEDFLYRFNIIEQKNTKGFHQPIQL	BACTERIAL_HEAD_TO_TAIL_CYCLIZED	51	discard
MTETKNEIKLHVLFGALAVGFLMLALFSFSLQILPVADLAKEFGIPGSVAAVVLNVVEAGGAVTTIISILTAVGSGGLSLIAAAGKETIRQYLKNEIKKKGRKAVIAW	BACTERIAL_HEAD_TO_TAIL_CYCLIZED	108	training set
MIELTMELMNSMNIGRSTATHVIDLAVAGASAWAIVASIAAGGGIIAIGAVAVRTLIKSKLKKLGYTALVAW	BACTERIAL_HEAD_TO_TAIL_CYCLIZED	72	training set
MRNNVSLNFNLNKIEKPFLFSLLVSVGMLIAVGNIYWICGKFGIRLAPGWYQDIVDFVSAGGSIVDAFAIIAGITLPAWIAPVLAGFGVVSA	BACTERIAL_HEAD_TO_TAIL_CYCLIZED	92	training set
MLNIGGGIILLGGDFMNFFMELAGYLGISSGAAKNIVNAIDWGGTAATVGSVILAVTSGGSAAPASVAVDSIILTVKNYLKKNEKAQAVTW	BACTERIAL_HEAD_TO_TAIL_CYCLIZED	91	training set
MATLERHHKMLLLSMALGAASWLALGLISLPNLAGALGISTANANTTVNLLSAYSTVSSVVAIVGAVTGVGSIGAGIAATVLYLIKQKGKAAALW	BACTERIAL_HEAD_TO_TAIL_CYCLIZED	95	training set
MSLLALVAGTLGVSQSIATTVVSIVLTGSTLISIILGITAILSGGVDAILEIGWSAFVATVKKIVAERGKAAAIAW	BACTERIAL_HEAD_TO_TAIL_CYCLIZED	76	training set
MRNNVSLNFNLNKIEKTFLFSLLVSVGMLIAVGNIYWICGKFGIRLAPGWYQDIVDFVSAGGSIVDAFAIIAGITLPAWIAPVLAGFGVVSA	BACTERIAL_HEAD_TO_TAIL_CYCLIZED	92	training set
MENLIFEIMGTFHVSRDTAQKVYNLVNAGASVASIVAVIVAATGPMAVGGAVVVYMIKKKIKGMAAAAAVAW	BACTERIAL_HEAD_TO_TAIL_CYCLIZED	72	training set
MSLTTRKKLFGLGFMSLIATVAVTSVAFMSINQNFLVAKLGIELSTAEKIADLIMAGGTIASIIGIVGAATGVGLALAGAIGALKAIAKAQGRKAVINY	BACTERIAL_HEAD_TO_TAIL_CYCLIZED	99	training set
MATLERHHKMLLLSMALGAASWLALGLISLPDLAGALGISTSSASTTVNLLSAYSTVSSVVAIVGAITGVGSIGAGITAIVYALSNTKERLLLSSGS	BACTERIAL_HEAD_TO_TAIL_CYCLIZED	97	training set
MKLSDSKKLYYTSIACAVMAFASFGLLTSPLLAGALGISTTAANQVVNLISAYSTVTTVISIVGAITGVGSIGSGVAAAVLYILKKKGKAAAALY	BACTERIAL_HEAD_TO_TAIL_CYCLIZED	95	training set
MGLFHVASKFKISQGIAGGVVAAVLNAGTLISAIGAVTVVMSGGIDAILEVGWTAFVATVKEQAAKRGTAGAVAW	BACTERIAL_HEAD_TO_TAIL_CYCLIZED	75	training set
MVNSLSNKKRVFLFVVIGLVLATLSSVAYISTLQITIHQTAVLPGNAYLASTLGISTAAAKKAIDIIDTASTIASIISLIGVVTGAGAISYAVVATAKAMIKKYGKKYAAAW	BACTERIAL_HEAD_TO_TAIL_CYCLIZED	112	training set
MTKATDSKFYALLSLSLLAVTLVALVIGNGSLIAANLGVSTATAATVVNFLDTWSSVATVITIVGVFTGVGTISSGVAATILAILKKQGKAKAAAF	BACTERIAL_HEAD_TO_TAIL_CYCLIZED	96	training set
MKSKRMEFHNKFLIVSVMLAVISWLSLGVVSFPMLAGTLGISTGSAATVVNLISAYSTVTAVISIVGAITGVGSIGSGIAATVLYMLKKKSAAKAALW	BACTERIAL_HEAD_TO_TAIL_CYCLIZED	98	training set
MLSAYRSKLGLNKFEVTVLMIISLFILLFATVNIVWIAKQFGVHLTTSLTQKALDLLSAGSSLGTVAAAVLGVTLPAWAVAAAGALGGTAA	BACTERIAL_HEAD_TO_TAIL_CYCLIZED	91	test set
MKSKRMEFHNKFLIVSAMLAVISWLSLGVVSFPMLTGTLGISTKAAATVVNLISAYSTVTAVISIVGAITGVGSIGSGIAATVLYILKKKGAAKAALW	BACTERIAL_HEAD_TO_TAIL_CYCLIZED	98	training set
MVNNLSNKYVFMIAIIGLAFATLSSIAFISTLQISIGDTALLAGNSHLASTLGISAYAAKKAVDIIDAASAVVSIISLIGIVTGGAGAISYAIVATAKYMIRNYGKKYAAAW	BACTERIAL_HEAD_TO_TAIL_CYCLIZED	112	training set
MSDLIMEIASSMGISWGVASKVIDLVLAGSSAWAIVAAIVSGGGIIAIGAVAIKALIQSKLKQMGRAAVITW	BACTERIAL_HEAD_TO_TAIL_CYCLIZED	72	test set
MKSKRMEFHNKFLIVSAMLAVISWLSLGVVSFPMLAGTLGISTKAAATVVNLISAYSTVTAVISIVGAITGVGSIGSGIAATVLYILKKKGAAKAALW	BACTERIAL_HEAD_TO_TAIL_CYCLIZED	98	training set
MFFLIEVAAALGVPSAVASTVVNVILGAGTAVTILGIISSIASGGATTLLTVGWAGFKATVQRLAKQSMARAIAY	BACTERIAL_HEAD_TO_TAIL_CYCLIZED	75	training set
MILAFVAAALGIPTAVATTVVNVILGAGTLVTVLGIISSVASGGATTIMTIGWAAFKKTVQNLAKKSMASAIAY	BACTERIAL_HEAD_TO_TAIL_CYCLIZED	74	training set
ALFLFSLQFLPVADLAKEFGIPASIAAVVLNIVNAGGAVTTIVSILLAVGSGGLSLLAAAGKETIRQFLKKKIQEKGKRATIAW	BACTERIAL_HEAD_TO_TAIL_CYCLIZED	84	training set
MNFFMELAGYLGISSGAAKNIVNAIDWGGTAATVGSVILAVTSGGSAAPASVAVDSIILTVKNYLKKNEKAQAVTW	BACTERIAL_HEAD_TO_TAIL_CYCLIZED	76	training set
MDKKQNLTSFQELTTTELNQITGGGWWEELLHETILSKFKITKALELPIQL	BACTERIAL_HEAD_TO_TAIL_CYCLIZED	51	training set
MGEVLDLVSTMNISWQSASKVIDAVNAGASIWGIVSIIVAGGGILGMGYAALALLVKKKVKDLGETAAIAW	BACTERIAL_HEAD_TO_TAIL_CYCLIZED	71	training set
MTKATDSKFYALLSLSLLAVTLVALVIGNGSLIAANLGVSTATAATVVNFLDTWSSVATVITIVGVFTGVGTISSGVAAAILAILKKEGKAKAAAF	BACTERIAL_HEAD_TO_TAIL_CYCLIZED	96	training set
MLLLALVAGTLGVSQAVATTVVSIVLTGSTLITIILGITAILSGGVDVILEMGWSAFVATIREIATTRGTAAAIGW	BACTERIAL_HEAD_TO_TAIL_CYCLIZED	76	training set
MVNSLTNKKRVFLFVVIGLVLATLSSVAYISTLQITIHQTAVLPGNAYLASTLGISTAAAKKAIDIIDTASTIASIISLIGVVTGAGAISYAVVATAKAMIKKYGKKYAAAW	BACTERIAL_HEAD_TO_TAIL_CYCLIZED	112	training set
MLNVMSFLGVDRMIAEQIVSIINSVGWVAVAAAIIASILSLGGLTVTASILNYVVITVKSYLSRNLWAVAVLW	BACTERIAL_HEAD_TO_TAIL_CYCLIZED	73	training set
MKSKRMEFHNKFLIVSAMLAVISWLSLGVVSFPMLAWTLGISTKAAATVVNLISAYSTVTAVISIVGAITGVGSIGSGIAATVLYILKKKGAAKAALW	BACTERIAL_HEAD_TO_TAIL_CYCLIZED	98	training set
MSLLALVAGTLGVSQAVATTVVSIVLTGSTLISIILGITAILSGGVDAILEIGWSAFVATVKKIVAERGKAAAIAW	BACTERIAL_HEAD_TO_TAIL_CYCLIZED	76	training set
MTETKNEIKLHVLFGALAIGFLMLALFSFSLQMLPVADLAKEFGIPGSVAAVVLNVVEAGGAVTTIVSILTAVGSGGLSLIAAAGKETIRQYLKNEIKKKGRKAVIAW	BACTERIAL_HEAD_TO_TAIL_CYCLIZED	108	training set
MLFVAATLGIPETLATTIVNIILTGSTIVSIILALTSILTAGVSAVILAGGWTAFINLVKSKVAQLGLRGAILW	BACTERIAL_HEAD_TO_TAIL_CYCLIZED	74	training set
MKSKRMEFHNKFLIVSAMLAVISWLSLGVVSFPMLAGTLGISTKSAATVVNLISAYSTVTAVISIVGAITGVGSIGSGIAATVLYILKKKGAAKAALW	BACTERIAL_HEAD_TO_TAIL_CYCLIZED	98	training set
MKNKNIFFIEIFITLSLFSVFFTFSSINLASMLGISKHAAEKVIDIIDTFSTVTTIISIITAVIGAGAITAGLVAVAKKMIKKYGKRYATMW	BACTERIAL_HEAD_TO_TAIL_CYCLIZED	92	training set
MFEIMGYFGVDRGWATKIVNAIDAVGWGVAAASAIAAIVTAGGLAVTSAMIDVAIFTVKDFLRRNLKAQAVAW	BACTERIAL_HEAD_TO_TAIL_CYCLIZED	73	test set
MTETKNEIKLHVLFGALAVGFLMLALFSFSLQMLPVADLAKEFGIPGSVAAVVLNVVEAGGAVTTIVSILTAVGSGGLSLIAAAGKETIRQYLKNEIKKKGRKAVIAW	BACTERIAL_HEAD_TO_TAIL_CYCLIZED	108	training set
MFDLAGMLGVDFYAAKKVIDIVATAGTVASVIGIVAAVAGTGGIGVGILAAAKALAKKYGTKAAATW	BACTERIAL_HEAD_TO_TAIL_CYCLIZED	67	training set
MKSKRMEFHNKFLIVSAMLAVISWLSLGVVSFPMLAGTLGISTKAAATVVNLISAYSTVTVVISIVGAITGVGSIGSGIAATVLYILKKKGAAKAALW	BACTERIAL_HEAD_TO_TAIL_CYCLIZED	98	training set
MKSKRMEFHNKFLIVSAMLAVISWLSLGVVSFPMLAGTLGISTKAAATVVNLISAYSTVTAVISIVGAITGVGSIGSGIAATVLYILKKKSAAQAALW	BACTERIAL_HEAD_TO_TAIL_CYCLIZED	98	training set
MRQQASWFGMLLGVGFLSCVFASLLSGASNPAMLAGMLGLSYSTALHIIDLLLAGWTVWSVLAVLATIATTGGITAGILYVAKALAERVGEEYAAAW	BACTERIAL_HEAD_TO_TAIL_CYCLIZED	97	training set
MIMKVAALLGISSNWAMKIVDLIATGASIWAIAAAVAASGGILAIGIVVLRELVMKKIKQVGYAAAVTY	BACTERIAL_HEAD_TO_TAIL_CYCLIZED	69	training set
MEFDVLFEIAKNFNLPESTATKVYNAVNNGADAWAVASIIIAATGPFSIGVGAVYMLIKNQMKKTAASVAIAW	BACTERIAL_HEAD_TO_TAIL_CYCLIZED	73	training set
MFQIAGYLGISTGMAKKIVDVIDAAGWAFVAVSTIMAILSAGGLAVTSAMVDYAIIYVKDLLKRNLKAQAIVW	BACTERIAL_HEAD_TO_TAIL_CYCLIZED	73	training set
MSLLALVAGTLGVSQAVATTVVSIVLTGSTLVSIILGITAILSGGVDAILEIGWSTFVATVKKIVTERGKAAAIAW	BACTERIAL_HEAD_TO_TAIL_CYCLIZED	76	training set
MTETRNEIKLHVLFGALAVGFLMLALFSFSLQMLPVADLAKEFGIPGSVAAVVLNVVEAGGAVTTIVSILTAVGSGGLSLIAAAGKETIRQYLKNEIKKKGRKAVIAW	BACTERIAL_HEAD_TO_TAIL_CYCLIZED	108	training set
MDLFNSIVEIAGTFKISMDTSTKVYDAVMAGADMWAVISIIAAVTGPLAIGGAVVFYMIKRKIKGMARSAAIAW	BACTERIAL_HEAD_TO_TAIL_CYCLIZED	74	training set
MRTLNISNYLNLSKFEKVAFFSLFLILSLLIINSNIYFIADKMGITLSTKMYRDIVDAVSAGGSIAGAFSLIVGVTLPGWLVVAAAGFGLTSA	BACTERIAL_HEAD_TO_TAIL_CYCLIZED	93	training set
MAETRNEIKLHVLFGALAVGFLMLALFSFSLQVLPVADLAKEFGIPGSVAAVVLNVVEAGGAVTTIVSILTAVGSGGLSLIAAAGKETIRQYLKNEIKKKGRKAVIAW	BACTERIAL_HEAD_TO_TAIL_CYCLIZED	108	training set
MEFDVLFEIAKNFNLPESTATKVYNAVNNGADAWAVASIIIAATGPFSIGVGAVYLLIKNQMKKTAASVAIAW	BACTERIAL_HEAD_TO_TAIL_CYCLIZED	73	training set
MKKNLLLVLPILGFAGFFVGVPMLSANIGISSYAAKKVIDIINTGSTVATIISIVAAVVGGGLITAGIVATAKSLIKKYGAKYAAAW	BACTERIAL_HEAD_TO_TAIL_CYCLIZED	87	training set
MTETRNEIKLHVLFGALAVGFLMLALFSFSLQMLPVADLAKEFGIPGSVAAVVLNVVEAGGAVTTIVSILTAVGSGGLSLIAAAGKETIRQYLKAQIKKKGRKAVIAW	BACTERIAL_HEAD_TO_TAIL_CYCLIZED	108	training set
MVATRNEIKLSLLLGALAMGFLMLALFLFSLQFLPVADLAKEFGIPASIAAVVLNIVNAGGAVTTIVSILLAVGSGGLSLLAAAGKETIRQFLKKKIQEKGKRATIAW	BACTERIAL_HEAD_TO_TAIL_CYCLIZED	108	training set
MGLFHVASKFKVSQGIAGGVVAAVLNAGTLISAIGAVTVVMSGGIDAILEVGWTAFVATVKEQAAKRGTAGAVAW	BACTERIAL_HEAD_TO_TAIL_CYCLIZED	75	training set
MLYELVAYGIAQGTAEKVVSLINAGLTVGSIISILGGVTVGLSGVFTAVKAAIAKQGIKKAIQL	BACTERIAL_HEAD_TO_TAIL_CYCLIZED	64	training set
MKLIDHLGAPRWAVDTILGAIAVGNLASWVLALVPGPGWAVKAGLATAAAIVKHQGKAAAAAW	BACTERIAL_HEAD_TO_TAIL_CYCLIZED	63	training set
MFLVNQLGISKSLANTILGAIAVGNLASWLLALVPGPGWATKAALATAETIVKHEGKAAAIAW	BACTERIAL_HEAD_TO_TAIL_CYCLIZED	63	training set
MVTKYGRNLGLSKVELFAIWAVLVVALLLATANIYWIADQFGIHLATGTARKLLDAVASGASLGTAFAAILGVTLPAWALAAAGALGATAA	BACTERIAL_HEAD_TO_TAIL_CYCLIZED	91	training set
MFLVAGALGVQTAAATTIVNVILNAGTLVTVLGIIASIASGGAGTLMTIGWATFKATVQKLAKQSMARAIAY	BACTERIAL_HEAD_TO_TAIL_CYCLIZED	72	training set
MSKKQIMSNCISIALLIALIPNIYFIADKMGIQLAPAWYQDIVNWVSAGGTLTTGFAIIVGVTVPAWIAEAAAAFGIASA	BACTERIAL_HEAD_TO_TAIL_CYCLIZED	80	training set
MVTKYGRNLGLNKVELFAIWAVLVVALLLTTANIYWIADQFGIHLATGTARKLLDAMASGASLGTAFAAILGVTLPAWALAAAGALGATAA	BACTERIAL_HEAD_TO_TAIL_CYCLIZED	91	training set
MKKNLLLVLPIVGIVGLFVGAPMLTANLGISSYAAKKVIDIINTGSAVATIIALVTAVVGGGLITAGIVATAKSLIKKYGAKYAAAW	BACTERIAL_HEAD_TO_TAIL_CYCLIZED	87	training set
MFDLVATGMAAGVAKTIVNAVSAGMDIATALSLFSGAFTAAGGIMALIKKYAQKKLWKQLIAA	BACTERIAL_HEAD_TO_TAIL_CYCLIZED	63	training set
MAKEFGIPAAVAGTVINVVVAGGWVTTIVSILTAVGSGGLSLLAAAGRESIKAYLKKEIKKKGKRAVIAW	BACTERIAL_HEAD_TO_TAIL_CYCLIZED	70	training set
MMNLVKSNKKSFILFGAALAAATLVYALLLTGTELNVAAAHAFSANAELASTLGISTAAAKKAIDIIDAASTIASIISLIGIVTGAGAISYAIVATAKTMIKKYGKKYAAAW	BACTERIAL_HEAD_TO_TAIL_CYCLIZED	112	training set
MSKLVKTLTISEISKAQNNGGKPAWCWYTLAMCGAGYDSGTCDYMYSHCFGIKHHSSGSSSYHC	BACTERIAL_HEAD_TO_TAIL_CYCLIZED	64	training set
MLFNVVSKLGWTGITIGTANTLIGALMTGSDIWTAISVAGLAFGGGIGTAISTIGRKAIMEVVEKVGKKKAAQW	BACTERIAL_HEAD_TO_TAIL_CYCLIZED	74	training set
MKIKKVLAGTLGLGVVGSVLTLNQLSGSGLANLTLQYDISAVNAGRIVSALEWASDMGAVIGLAGAILGAGIGAAAISAAVAIAKRKLLKEGKKAAVLY	BACTERIAL_HEAD_TO_TAIL_CYCLIZED	99	training set
MKGGILLFQIAGYFGISTGMAKKIVDVIDAAGWAFVAVSTIMAILSAGGLAVTSAMVDYAIIYVKDLLKRNLKAQAIVW	BACTERIAL_HEAD_TO_TAIL_CYCLIZED	79	training set
MTHTQNRFMQIMPYMLLIMGLVLTLMVAGLVQSQLIMQIAGKISWTGVNTATITSVLNVIMGGASIGSAVAAVVGIALGGPLTAALTALGRGMLVKWVKKRGIKSAAKF	BACTERIAL_HEAD_TO_TAIL_CYCLIZED	109	training set
MKGGILLFQIAGYLGISTGMAKKIVDVIDAAGWAFVAVSTIMAILSAGGLAVTSAMVDYAIIYVKDLLKRNLKAQAIVW	BACTERIAL_HEAD_TO_TAIL_CYCLIZED	79	training set
MLKLHKKIAWTGIKGSAITTFINALYNGSSVWNALAVAGIAFGGGAGTAVAALGRATVMRFIKRWGVRKTAAW	BACTERIAL_HEAD_TO_TAIL_CYCLIZED	73	training set
MLFNVVSKLGWTGINIGTANALIGALMTGSDIWTAISVAGLAFGGGIGTAISTIGRKAIMEMVEKVGKKKAAQW	BACTERIAL_HEAD_TO_TAIL_CYCLIZED	74	training set
MKTKKVLAGILGLGVVGSVLALNQFSGSGLANLTLQYDISAANAGRIVSALEWASDMGAVIGLAGAILGAGIGAAAVSAAVAIAKRRLLKEGKKAAVLY	BACTERIAL_HEAD_TO_TAIL_CYCLIZED	99	training set
MKNFNTLSFETLANIVGGRNNLAANIGGVGGATVAGWALGNAVCGPACGFVGAHYVPIAWAGVTAATGGFGKIRK	BACTERIAL_HEAD_TO_TAIL_CYCLIZED	75	training set
METLVKRRNTLIFSLLVTISIASLLFLTLTTPELTSTLGISSYAAKKAIDIIAAAGDVAAIVGLIGAVTGAGAIGAGILFTAKKLIKSYGKKYAAAW	BACTERIAL_HEAD_TO_TAIL_CYCLIZED	97	training set
MNLVKSNKKSFILFGAALAAATLVYALLLTGTELNVAAAHAFSANAELASTLGISTAAAKKAIDIIDAASTIASIISLIGIVTGAGAISYAIVATAKTMIKKYGKKYAAAW	BACTERIAL_HEAD_TO_TAIL_CYCLIZED	111	training set
MKSKRMEFHNKFLIVSAMLAVISWLSLGVVSFPMLAGTLGISTKAAATVVNLISAYSTVTAVISIVGAITGVGSIGSGIAATVLY	BACTERIAL_HEAD_TO_TAIL_CYCLIZED	85	training set
MKSKRMEFHNKFLIVSAMLAVISWLSLGVVSFPMLAGTLGISTKAAATVVNLISAYSTVTAVISIVGAITGVGSIGSGIAATVLYILKKNGAAKA	BACTERIAL_HEAD_TO_TAIL_CYCLIZED	95	training set
MKSKRMEFHNKFLIVSAMLAVISWLSLGVVSFPMLAGTLGISTKAAATVVNLISAYSTVTAVISIVGAIT	BACTERIAL_HEAD_TO_TAIL_CYCLIZED	70	test set
MRANGLVRRKRMATLERHHKMLLLSMALGAASWLALGLISLPDLAGALGISTSNASTTVNLLSAYSTVSSVIAIVGAITGVGSIGAGMTATVYTLSNTKERLLLFSGS	BACTERIAL_HEAD_TO_TAIL_CYCLIZED	108	training set
MKSKRMEFHNKFLIVSAMLAVISWLSLGVVSFPMLAGTLGISTKAAATVVNLISAYSTVTAVISIVGAITGVGSIGSGIAATVLYILKKKGAAKAALWLELDENTF	BACTERIAL_HEAD_TO_TAIL_CYCLIZED	106	training set
MELIIADLTAYTGISTAWATVIVNAINVGSTVIALASIFASAGLSAGLILVVKEFVKKNGTKAAIAW	BACTERIAL_HEAD_TO_TAIL_CYCLIZED	67	training set
MILTGLAASAMAVVAMLSLEMLPLAQLAKEFGIPGGVASTVVWLAEAGGAAATIVGILAALGTGGLSLIAAAGKETIRQYLRKKIQEKGRKAVIAW	BACTERIAL_HEAD_TO_TAIL_CYCLIZED	96	training set
MEPSFLHNYTDSTVEIAGTFKISMDTSTKVYDAVMAGADMWAVISIIAAVTGPLAIGGAVVFYMIKRKIKGMARSAAIAW	BACTERIAL_HEAD_TO_TAIL_CYCLIZED	80	training set
MLFKIAGTLGVSSAVATSIVSIILTGSTVVSIILGITAILRVVSMLF	BACTERIAL_HEAD_TO_TAIL_CYCLIZED	47	training set
MNHSVKLKAANLGFLLALGIVLLSTYAFLLGMLPEMNLVKEFNIPTSVASAALGYLDVISNAVALAGAIAALGTGGASLIAAAGAQGVKVFLKTMWREKGRKATIAY	BACTERIAL_HEAD_TO_TAIL_CYCLIZED	107	training set
MTYSVKGRAVSFGALLAVGGALLASYAFLLGILPEMNLVKEFNLSTVAAAQVFAWLDYISWGVSLVALIGSLGTGGASLVAAAGAQGIRKYLTDLAKEKGKKAAIAY	BACTERIAL_HEAD_TO_TAIL_CYCLIZED	107	training set
MFEVMGYFGVDRGWATKIVNAIDAVGWGVAAAGTIAAIISAGGLAVTSAMIDAAIITVKSYLKRNLKAQAIAW	BACTERIAL_HEAD_TO_TAIL_CYCLIZED	73	training set
MGLFHVASKFHVSAGIASGVVTAVLHAGTIASIIGAVTVVMSGGVDAILDMGWTAFIAEVKHLAKEYGKKRAIAW	BACTERIAL_HEAD_TO_TAIL_CYCLIZED	75	training set
MLEAMGFFGVGKTLATQIVNVVDAVGYAAIAVSTIMAILSAGGLAPTAAAIDFAIIYIKKKIANNLKAQAIVW	BACTERIAL_HEAD_TO_TAIL_CYCLIZED	73	training set
MKNSNLFKIASITGVVSLFAIATFLMGSSEGIAGLASIDFSSGHQFALDLATNLGISKKTAYVAIGVIMTTGDVLTILSLLAVVLGGTGLITAAMVATAKKLAKKYGKKYAAEW	BACTERIAL_HEAD_TO_TAIL_CYCLIZED	114	training set
MTYSVKGRAVSFGALLAVGGALLASYAFLLGILPEMNLVKEFNLSTVAAAQVFAWLDYISWGVSLVALIGSLGTGGAALVAAAGAQGIRKYLTDLAKEKGKKAAIAY	BACTERIAL_HEAD_TO_TAIL_CYCLIZED	107	training set
MTKMEKTVLTIGSFVIAALMVTILFTNIYFIANKLGIHLAPGWYQDMVNYVSAGGSLAGAFSVVAGVTLPAWIVPIATAFGAVSA	BACTERIAL_HEAD_TO_TAIL_CYCLIZED	85	discard
MLSTVEKLHMTKMEKTVLTIGSFVIAALMVTILFTNIYFIANKLGIHLAPGWYQDMVNYVSAGGSLAGAFSVVAGVTLPAWIVPIATAFGAVSA	BACTERIAL_HEAD_TO_TAIL_CYCLIZED	94	test set
MLKLHKKIAWTGIKGSAITTFITALYNGSSVWNALAVAGIAFGGGAGTAVAALGRATVMRFIKRWGVRKTAAW	BACTERIAL_HEAD_TO_TAIL_CYCLIZED	73	training set
MNNSIMASEFGLNKIEKAFLFSLLVSVVTIVAVGNIYWVCGKFGIELAPGWYQDIVDFVSSGGTIVEAFAAVAGVTLPAWVGPVLAAFGLASA	BACTERIAL_HEAD_TO_TAIL_CYCLIZED	93	training set
MHSGAAPDLATQLGISTVAATKLINAATSWYVTVLLAALTGGWGAGLVAVAKKMAAKYGTKYAAAW	BACTERIAL_HEAD_TO_TAIL_CYCLIZED	66	training set
MFAVGGWFVLFVGEEWDSVANPDVQTGENVGYFCCSTSLDATARGVGCVFHGSWHRTCQAMA	BACTERIAL_HEAD_TO_TAIL_CYCLIZED	62	training set
MKNFNTLSFETLANIVGGRNNWAANIGGVGGATVAGWALGNAVCGPACGFVGAHYVPIAWAGVTAATGGFGKIRK	BACTERIAL_HEAD_TO_TAIL_CYCLIZED	75	training set
MDKKNLLPNQGAPVIRGISGKLPSHLAELSEEALGGNGLEASGTICISAFDGAEASATFTICAFDGAEASATFSFCAFDGDEA	CYANOBACTIN	83	training set
MKTKKLTPRNAAPVQRENTATVSRDGNAIIPHFTFPPFPPIGLFAGDDAE	CYANOBACTIN	50	test set
MTKKNLKPQQAAPVQREINTTSSVGGTGLTPDRIVDGRGVRVDGIAFAGDDAE	CYANOBACTIN	53	training set
MKTKKLTPRNAAPVQRENTATVSRDGNAIAPRYAWHSDMRKGSLNPFAGDDAE	CYANOBACTIN	53	training set
MDKKNISPNPQQPIDRVPTGQLPSALAELSEEAIGSLEALPQGFDPYNPCMCSYDGDDE	CYANOBACTIN	59	training set
MTKKNLKPQQTAPVQREINTTSSEAGTGLTPLLRSVGFNPFAGDDAE	CYANOBACTIN	47	training set
MDKKNIIPQQAQPVVRVTQGTQADLLAELSEETLATVTGARASLVTDSITLACYCACSYDGDDAE	CYANOBACTIN	65	training set
MDKKNITPNPQQPVDRVPTGQLPSALAELSEEAIGSLEALPSGFMGTGCFPHCSYDGDDE	CYANOBACTIN	60	training set
MTKKNLKPQQAAPVQREINTTSSEAGTGLTPLNSLFLFLDPFAGDDAEVFLSHGLFLQNLR	CYANOBACTIN	61	training set
MTKKNLKPQQAAPVQREINTTSSVGGTGLTPLVRNGTVIYRGGPSPFAGDDAE	CYANOBACTIN	53	training set
MDKKNISPNPQQPVDRVPSGQLPSALAELSEEAIGSLALASGLPGMPCFCSYEGDDE	CYANOBACTIN	57	training set
MDKKNIIPQQAQPVQRSTQGTKADLLAELTEENLGTVAGATASMVTDKVSMACYCACSYDGDEAE	CYANOBACTIN	65	training set
MDKKNLLPNQGAPVIRGISGKLPSHLAELSEEALGGNGAEASATVSICAFDGAEASFTGCMCAFDGAEASITGCICAFDGDEA	CYANOBACTIN	83	training set
MDKKNILPQQGKPVFRTTTGKLPSYLAELSEEALGGNGLEASHCATICAFDGAEASHCATICAFDGAEASHCATICAFDGDEA	CYANOBACTIN	83	training set
MDKKNITPNPQQPVDRVPSGQLPSALAELSEEAIGSLEALPAGRGGLPPCVCSYDGDDE	CYANOBACTIN	59	training set
MDKKNILPQQGKPVIRITNGQLPSHLAELSEEALGGAGVDASTAPCYCSYNGVDASTAPCYCSYDGVDASTAPCYCSYDGDE	CYANOBACTIN	82	training set
MTKKNLKPQQAAPVQREINTTSSEGGTGLTPLNERGYGLWVPFAGDDAE	CYANOBACTIN	49	training set
MDKKNIIPQQAQPVVRVTQGTKADLLAELTEENLGTTVGATASLVTNNVTLACYCACSYDGDEAE	CYANOBACTIN	65	test set
MIKKNIRPQQSAPVQRQVTTTSGQGEKALFASTECDILTRQCTPFAGDDGGVVPLILSTHLSFYPPSPP	CYANOBACTIN	69	training set
MKTKKLTPRNAAPVQRENTATVSSDGNAIASLSRGTIYYPFAGDDAE	CYANOBACTIN	47	training set
MKTKKLTPRNAAPVQRENTATVSRDGNAIASHIFIFLLTPFAGDDAE	CYANOBACTIN	47	training set
MDKKNLLPNQGAPVIRGISGKLPSHLAELSEEALGGNGLEASYTSSICAFDGAEASVLATFCAFDGAEASVTVTICAFDGDEA	CYANOBACTIN	83	training set
MTKKNLKPQQAAPVQREINTTSSVGGTGLTPLWESKVWWDIIDPFAGDDAE	CYANOBACTIN	51	training set
MTKKNLKPQQAAPVQREINTTSSEGGTGLTPNTDAERPTAGFWGNPFAGDDAE	CYANOBACTIN	53	training set
MKAKKLTPRNAAPVQRENTATVSRDGNAIAHLWFFGSGSWHSGNPFAGDDAE	CYANOBACTIN	52	training set
MTKKNLKPQQAAPVQREINTTSSVGGTGLTPLRRGSWSHTGPDRDPFAGDDAE	CYANOBACTIN	53	training set
MKTKKLTPRNAAPVQRENTATVSRDGNAIAPHFEFLGLRLPFAGDDAE	CYANOBACTIN	48	training set
MKTPKLTPRITAPVQRDNISTVPSDGNVITPATFCDLATRQCYPFAGDDAV	CYANOBACTIN	51	training set
MTKKNLKPQQAAPVQREINTTSSEAGTGLGLTPCGLVMFGVPFAGDDAE	CYANOBACTIN	49	training set
MTKKNLKPQQAAPVQREINTTSSVGGTGLTPNTDAERPTAGFWGNPFAGDDAE	CYANOBACTIN	53	training set
MNKKNISPNPQQPVDRVPTGQLPSALAELSEEAIGSLEALPSGFMGTGCFPHCSYDGDDE	CYANOBACTIN	60	training set
MDKKNIIPQQAQPVVRVSQGTQADLLAELSEETLASTPGAGASMKTNDMTLACYCVCSYDGDDAE	CYANOBACTIN	65	training set
MDKKNIIPQQAQPVQRSTQGTKADLLAELTEENLGTVAGATASMVTDKVSTACYCACSYDGDEA	CYANOBACTIN	64	training set
MDKKNITPNPQQPVDRVPSGQLPSALAELSEEAIGSLALASGLPGMPCFCSYEGDDE	CYANOBACTIN	57	training set
MTKKNLKPQQAAPVQREINTTSSEAGTGLTPLNSLFLFLDPFAGDDAE	CYANOBACTIN	48	training set
MTKKNLKPQQAAPVQREINTTSSEAGTGLTPLYDGYFVVTNPFAGDDAE	CYANOBACTIN	49	training set
MKAKKLTPRNAAPVQRENTATVSRDGNAIAPLSIGPRSRAPFAGDDAE	CYANOBACTIN	48	training set
MTKKNLKPQQAAPVQREINTTSSVVVGGTAVTPLFDFMTGWWTGHPFAGDDAEVFLSHGLFLQNLR	CYANOBACTIN	66	test set
MDKKNILPHQGKPVLRTTNGKLPSHLAELSEEALGGAGMDASFFPCSYDGADASFFPVCSYDGADASFFPCSYDDGDA	CYANOBACTIN	78	training set
MDKKNISPNPQQPVDRVPSGQLPSALAELSEEAIGSLALASGLVLMPCFCSYEGDDE	CYANOBACTIN	57	training set
MDKKNISPNPQQPVDRVPSGQLPSALAELSEEAIGSLEALPAAGCGLPPMFCSYDGDDE	CYANOBACTIN	59	training set
METKKLTPRNAAPVQRENTATVSRDGNAIAPLLLDLGRVAPFAGDDAE	CYANOBACTIN	48	training set
MTKKNLKPQQAAPVQREINTTSSEGGTGLAPFSFWAPFMPFAGDDAE	CYANOBACTIN	47	training set
MKTPKLTPRITAPVQRDNISTVPSDGNVITPATFCDLATKQCYPFAGDDAV	CYANOBACTIN	51	training set
MKAKKLTPRNAAPVQREINTTSSEGGTGLTPLILGEGEGWNYNPFAGDDAE	CYANOBACTIN	51	training set
MNKKNILPNPGKPVIRGISGKLPSYLAELSEEALGDAGADASFICSVDASFICSVDASFICSVDASFICSVDGDA	CYANOBACTIN	75	training set
MTTKNLKPQQAAPVQREINTTSSVGGTGLTPNTDAERPTAGFWGNPFAGDDAE	CYANOBACTIN	53	training set
MIKKNIRPQQSAPVQRQVTTTSCQGEKALFASTECDILTRQCTPFAGDNAE	CYANOBACTIN	51	training set
MNKKNIIPQQAQPVARVTQGKQADLLAELSEENLSTTGIAAAVRQEGTNIEIMCSFDGDELE	CYANOBACTIN	62	training set
MDKKNILPHQGKPVLRTTNGKLPSHLAELSEEALGGNGVDASACMPCYPSYDGVDASVCMPCYPSYDGVDASVCMPCYPSYDDAE	CYANOBACTIN	85	test set
MKTKKLTPRNDATVQREINTTSSEGGTGLTPSMSGVDYYNPFAGDDAE	CYANOBACTIN	48	training set
MTKKNLKPQQAAPVQREINTTSSVVGGTAVTPLDRWKLEYPFAGDDAE	CYANOBACTIN	48	training set
MNKKNISPNPLQPIDRVPTGQLPSALAELSEEAIGSQAQAASIRLPDPSFCSYEGDDE	CYANOBACTIN	58	training set
MNKKNISPNPQQPVDRIPTGQLPSVLAELSEEAIGSQAQAASARLAAGGICSYEGDDE	CYANOBACTIN	58	training set
METKKLTPRNAAPVQRENTATVSRDGNAIAPTTGNKSGKVTPFAGDDAE	CYANOBACTIN	49	training set
MTKKNIRPQQVAPVERETISTAKDQSGQVQAQTSQIWGSPVPFAGDDAE	CYANOBACTIN	49	training set
MKTLKLTPRITAPVQRDNITTVPSDANMITPATFCDLATKQCYPFAGDDAV	CYANOBACTIN	51	training set
MNKKNILPQQGQPVIRLTAGQLSSQLAELSEEALGDAGLEASVAACITFCAYDGVEPSCTLCCTLCAYDGE	CYANOBACTIN	71	training set
MNKKNILPQQGQPVIRLTAGQLSSQLAELSEEALGDAGLEASVTACITFCAYDGVEPSCTLCCALCAYDGE	CYANOBACTIN	71	training set
MNKKNILPQQGQPVIRLTAGQLSSQLAELSEEALGDAGLEASVTACITFCAYDGVEPSCTLCCTLCAYDGE	CYANOBACTIN	71	training set
MNKKNILPQQGQPVIRLTAGQLSSQLAELSEEALGDAGLEASLTACITFCAYDGVEPSCTLCCTLCAYDGE	CYANOBACTIN	71	training set
MRITPMDKKNILPQQGKPVFRTTTGKLPSYLAELSEEALGGNGLEASHCATICAFDGAEASHCATICAFDGDEA	CYANOBACTIN	74	training set
MRITPMDKKNLLPNQGAPVIRGISGKLPSHLAELSEEALGGNGAEASATVSICAFDGAEASFTGCMCAFDGAEASITGCICAFDGAEASITGCICAFDGDEA	CYANOBACTIN	102	training set
MNKKNILPQLGQPVIRLTAGQLSSQLAELSEEALGGVDASTSIAPFCSYDGVDASTSIAPFCSYDGVDASTSIAPFCSYDD	CYANOBACTIN	81	training set
MDLQNLLPQQANPIHRTTTGQLPAELAELSDETLCNSGVLPSGFEAPVLYKDQCSYEGDDAE	CYANOBACTIN	62	training set
MTKKNIRPQQVAPVERETISTAKDQSGQVQAQSSVIWGSPVPFAGDDAE	CYANOBACTIN	49	training set
MTKKNIRPQQVAPVERETISTAKDQSGQVQAQSAQWQNFGVPFAGDDAE	CYANOBACTIN	49	training set
MTKKNIRPQQVAPVERETISTAKDQSGQVQAQNAHWQNFGVPFAGDDAE	CYANOBACTIN	49	training set
MTKKNIRPQQVAPVERETISTAKDQSGQVQAQYAPLQNFGVPFAGDDAE	CYANOBACTIN	49	training set
MTKKNIRPQQVAPVERETISTAKDQSGQVQAQDNWLGEWIGIPFAGDDAE	CYANOBACTIN	50	test set
MTKKNIRPQQVAPVERETISTAKDQSGQVQALRERFVYPFAGDDAE	CYANOBACTIN	46	training set
MTKKNIRPQQVAPVERETISTAKDQSGQVTAQYSNKPSDFSPFAGDDAE	CYANOBACTIN	49	test set
IRPQQVAPVERETISTAKDQSGQVTAHYDDKLNLSPFAGDDAE	CYANOBACTIN	43	training set
MTKKNIRPQQVAPVERETISTAKDQSGRVTVQWGNGTGLDWKLLTGGISASPFAGDDAE	CYANOBACTIN	59	training set
MTKKNIRPQQVAPVQRETISNAKDQSGQVTPHHQPWHAAPFAGDDAE	CYANOBACTIN	47	training set
MTKKNIRPQQVAPVERETISTAKDQSGQVTAQFSPDWRAPFAGDDAE	CYANOBACTIN	47	training set
MTKKNIRPQQVAPVEREIISTAKDKSGQVEAQVIQHYLFPFAGDDAE	CYANOBACTIN	47	training set
MTKKNIRPQQVAPVERETISTAKDQSGQVTALLIGIMHPFAGDDAE	CYANOBACTIN	46	training set
MTKKNLKPQQAAPVQREINTTSSESGTSTGLTPHQAYLGIPLPFAGDDAE	CYANOBACTIN	50	training set
MTKKNLKPQQAAPVQREINTTSSESGTSTGLTPHINPYLYPFAGDDAE	CYANOBACTIN	48	training set
RNSAPVQRENAATVSRDGNAIAPQWILLADGTRPKNAPFAGDDAE	CYANOBACTIN	45	training set
MGKKNIQPNSSQPVFRSLVARPALEELREENLTEGNQGHGPLANGPGPSGDGLHPRLCSCSYDGDDE	CYANOBACTIN	67	training set
MNKKNILPQLGQPVIRLTAGQLSSQLAELSEEALGGVDASTLPVPTLCSYDGVDASTVPTLCSYDD	CYANOBACTIN	66	training set
MTKKNIRPQQVAPVERETISTAKDQSGQVEAQHAFIGYDQDPTGKYPFAGDDAE	CYANOBACTIN	54	training set
MDLQNLLPQQSQPIQRITAGQLPAELAELSELNLSNLSSSSLVLKSGSNCIGKLGDSYCSHVGDEAE	CYANOBACTIN	67	training set
MDKKNILPQQGKPVFRTTTGKLPSYLAELSEEALGGNGLEASHCATICAFDGAEASHCATICAFDGDEA	CYANOBACTIN	69	training set
MNKKNILPQQGQPVIRLTAGQLSSQLAELSEEALGDAGLEASVTACITFCAYDGVEPSITVCISVCAYDGE	CYANOBACTIN	71	training set
MNKKNILPQQGQPVIRLTAGQLSSQLAELSEEALGDAGLEASLTACITFCAYDGVEPSITVCISVCAYDGE	CYANOBACTIN	71	training set
MNKKNILPQLGQPVIRLTAGQLSSQLAELSEEALGGVDASTFPVPTVCSYDGVDASTSIAPFCSYDD	CYANOBACTIN	67	training set
MDKKNILPQQGKPVIRITTGQLPSFLAELSEEALGDAGVGASATGCMCAYDGAGASATGCMCAYDGAGASATACACAYDGAGASATACACAYE	CYANOBACTIN	93	training set
MDLQNLLPQQSQPIQRATAGQLPTELAELTEEALNNESAVLASSCDCSLYGGCESCSYEGDEAE	CYANOBACTIN	64	training set
MKTKKLTPRNSAPVQRENAATVSRDGNAIAPNNEFMQTGSYSGPFAGDDAE	CYANOBACTIN	51	training set
MKTPKLTPRITAPVQRDNIATVPSDGNVITPATFCDLATKQCYPFAGDDAV	CYANOBACTIN	51	training set
MDKKNILPHQGKPVLRTTNGKLPSHLAELSEEALGGAGMDASFFPCSYDG	CYANOBACTIN	50	training set
MDKKNILPHQGKPVLRTTNGKLPSHLAELSEEALGGAGMDASFFPCSTDGADASFFPVCSYDGADASFFPCSYDDGDA	CYANOBACTIN	78	training set
MGKKNIQPNSSQPVFRSLVARPALEELREENLTEGNQGHGPLANGPGPSGDGLHPRLCSCSYSGDDE	CYANOBACTIN	67	training set
MNKKNILPNPGKPVIRGISGKLPSYLAELSEEALGDAGADASFICSVDASFICSVDASFICSVDASFICSVGDA	CYANOBACTIN	74	training set
MTKKNLKPQQAAPVQREINTASSVGGTGLTPTIEHRYSETRPFAGDDAE	CYANOBACTIN	49	training set
MKTKKLTPRNDAPVQREINTTSSEGGTGLTPSMSGVDYYNPFAGDDAE	CYANOBACTIN	48	training set
MKTKKLTPRNSAPVQRENAATVSRDGNAIAPNNEFMQGSYSGPFAGDDAE	CYANOBACTIN	50	training set
MKTKKLTPRITAPVQRDNIATVPSDGNVITPATFCDLATKQCYPFAGDDAV	CYANOBACTIN	51	training set
MDKKNILPHQGKPVRLTTNGKLPSHLAELSEEALGGNGVDASACMPCYPSYDGVDASVCMPCYPSYDGVDASVCMPCYPSYDDAE	CYANOBACTIN	85	discard
MNKKNILPQQGQPVIRLTAGQLSSQLAELSEALGDAGLEASACFPTICAYDGVEPSFCFPTVCAYDGE	CYANOBACTIN	68	training set
MNKKNILPQQGQPVIRLTAGQLSSQLAELSEALGDAGLEASVAACITFCAYDGVEPSCTLCCTLCAYDGE	CYANOBACTIN	70	training set
MGKKKLLPGQKSPIVRSTTAKPIPGLEETALTEGMGGTTSHGVTPSISAPPGVTFSFPFAGEGDE	CYANOBACTIN	65	test set
MPKKKLTPKQTAPVSRNGVARQNEESVSESLSQYCVAQISNGYLIPFAGDDAE	CYANOBACTIN	53	test set
MDKKNILPQQGKPVIRITNGQLPSHLAELSEEALGGAGVDASTAPCYCSYNGVDASTAPCYCSYDGVDASTAPCYCSYDGED	CYANOBACTIN	82	training set
MRPENQKENRCLQPKLSEPAMRSHAGMPVDLSEEELTAEVVNGGVFASMYGGTDGGVTASISPALLASLV	CYANOBACTIN	70	training set
ADASFFPVCSYDGADASFFPCSYDDGDA	CYANOBACTIN	28	training set
MANNNFDLDVQVKSVSGANANFGLYTSTCYTSQCYTSKCYTDTCYSSDCYTGRHMCGYTHGYSC	LANTHIPEPTIDE	64	training set
MSKEYKFTKEELVEAWKDPQVREKLKDLPKHPSGKALNELSEEELAEIQGASDVQPETTPLCVGVIIGLTTSIKICK	LANTHIPEPTIDE	77	training set
MAPAAVLTKPITETTTAPTEDPFDVQVEVVTEIDAEQLPQACGTGDGCKSTCASSCASAV	LANTHIPEPTIDE	60	training set
MYQGDLSLIEEIEEQDFDGVAYGACTTNTFSLSDALGNHGGWCTLTKECQPNCS	LANTHIPEPTIDE	54	training set
MADKKIFELDVQVLKSASKVEPQVTSAFACTPGCNPTATLCTSCAFNCTYKSPC	LANTHIPEPTIDE	54	training set
MYDIDVNKYAGDSFEEMSIAEMTMVQGSGDMSAELTPTTPACYASIIYTAKASSPNCAYAATAISGAISGAIISAVKC	LANTHIPEPTIDE	78	training set
MSKFDDFDLDVVKVSKQDSKITPQWKSESLCTPGCITGVLQTCFLQTITCNCHISK	LANTHIPEPTIDE	56	training set
MEASTVKQQASPPAAPAGDPFDLDISVLESGDGSAVLINLTDDGCKPTCKGSCATNVA	LANTHIPEPTIDE	58	training set
MAEEVLNLQLVSVQVDETDEVDGMRFSTFSTNRCGNWSAFSWKNC	LANTHIPEPTIDE	45	training set
MSAPTIDTVADSDFDLDLRITTTVTPGVASACDTSDGCDPTCASSCISTV	LANTHIPEPTIDE	50	training set
MALLDLQSLEPQEDLTGGGGDDSSASLLLCDKFSSHSALLCL	LANTHIPEPTIDE	42	training set
MYKGDVSLVEEIAEQDFDGVAYGACTTNTFSLSDVLGNTGGWCTLTVECQPNCN	LANTHIPEPTIDE	54	training set
MALMDLQGLTVENSDHPGRSSLSVHCGSRASVTICDS	LANTHIPEPTIDE	37	training set
MENAKNAFDLDLEVTKSKDVVEPNITSYSFCTPGCGETGSFNSYCC	LANTHIPEPTIDE	46	training set
MYKGDISLLEEIEEQDFAFGAGCSLNTTTFTLSAQLGDKGDCCTATKECQPSCN	LANTHIPEPTIDE	54	training set
MKGVCNLDTNSIIMSWKNPKLRKKVQVEHPAGKGFQELSVSEMNFIAGGNVTVQPQVTPATPIISKISMGVSGAAASFVVSYISSAAFDCRD	LANTHIPEPTIDE	92	training set
MNLFEMQSMETPKEEAMGDVETGSRASLLLCGDSSLSVTTCN	LANTHIPEPTIDE	42	training set
MHLKRKGENAMADNLFDLDVQVNKSQGSVEPQVLSIVACSSGCGSGKTAASCVATCGNKCFTNVGSLC	LANTHIPEPTIDE	68	training set
MSVQSEEAVATVPAAAEGQEGAVDGWDLDVSIVESGPEADRLIQMTDDGCGQTCESACQSTCP	LANTHIPEPTIDE	63	training set
MAEKKGMFDLDVQVLKSSEVTPQIKSKSLCTPGCNPTATLCTSCIFACA	LANTHIPEPTIDE	49	training set
MKNDFVIGKSLKELSLEEMQLVYGGTDGADPRSTIICSATLSFIASYLGSAQTRCGKDNKKNKIFNFKNKSCSLFSSLVTNNFERGFFLKQ	LANTHIPEPTIDE	91	training set
MTLLDLQTMETPAEEITGELATGGGSRASLLLCGDSSLSVTTCN	LANTHIPEPTIDE	44	training set
MTAVQTERPTAPVQSDLATTTEADPFGLDITFIEGTPATETVLMCSTGDTCGSSCPSACTTS	LANTHIPEPTIDE	62	training set
MNRNQIIEELAENHPAGAKLVEVSKDELARTYGGGDVQPETTPACGIAIAAWGAHELTYFYC	LANTHIPEPTIDE	62	training set
MPKYDDFDLDIQVKKVDNLVEPNITSVSLCTPGTCWNTCGGTSTLNTNCCIATYLCSLAESCR	LANTHIPEPTIDE	63	test set
MSRNQVMEELKMNHPAGAPMVEVSEDELARVYGGGDVQPETTPACVGAGITVGIAISKLLC	LANTHIPEPTIDE	61	training set
MTQFDDFDLDVAQTINGVKPEPRITSVSLCTMGCQGSKLQTVICNWVK	LANTHIPEPTIDE	48	training set
MALLDLQNLESDELHGGGGQSTASLLSCVSTASVLLCL	LANTHIPEPTIDE	38	training set
MSNNQFDLDVQVSKNVGKIEPQMTSVIACTTGCITGPNCGSSECGTVPCGKTTSIYC	LANTHIPEPTIDE	57	training set
MALLDLQAMEPPAPEGGGDGHGGGSSVSLTLCDSFASVLLCL	LANTHIPEPTIDE	42	training set
MKQSDEMLELIQEVSLDELDQVIGGAGNGVIRTITQGCRMPNNMQVLFTC	LANTHIPEPTIDE	50	training set
MFTNNKEVVPSFEDLSLEEMYALQDDTGVEAEISPTTTSSAFCIGAGVGLFASAVQC	LANTHIPEPTIDE	57	training set
MAEEVLNLQLVSVQVDETDEVDGMRFSTFSTNRCGNCSAFSWENC	LANTHIPEPTIDE	45	training set
METEKYLQVVEDEELEQLVGGAGPGWVETLTKDCPWKQPGACVIIMGQKICKKCY	LANTHIPEPTIDE	55	training set
MAILDLQTIELAETEAVEIDDTMANVSSLSVLNCTVSTVSTLLCL	LANTHIPEPTIDE	45	training set
MALLDLQTMESDEQTDGGANSTLSLLSCISAASVTLCL	LANTHIPEPTIDE	38	training set
MNKNDVFDLDVQIKETNLVQPDSVTEDLIGSLFCSGTFCSWCC	LANTHIPEPTIDE	43	training set
MTILDLQTMETAHHGGRPRRSGASKYCGGTSRLSLLLC	LANTHIPEPTIDE	38	test set
MRNDILNLTNPMEEKELEQILGGGNGVIKTISHECAMNTWQFLFTCCS	LANTHIPEPTIDE	48	training set
MAKLDDFDLDIVVKKQDNIVQPNITSKSLLYPGLHHRHLNVLNAKFLCIL	LANTHIPEPTIDE	50	training set
MPADILETRTSETEDLLDLDLSIGVEEITAGPAVTSWSLCTPGCTSPGGGSNCSFCC	LANTHIPEPTIDE	57	training set
MEKFNTEALKAIEDITDEELMTVAGADGAQRANSSGVVCTVTHECHYNSISPSSWATCC	LANTHIPEPTIDE	59	training set
MSKNEKLAKLRNQEFDTKELIGSIDENELKKVAGAGDVNPETTPATPTIVEATIAATVSICPTT	LANTHIPEPTIDE	64	discard
MKKNMKAIEEVSEQELKELAGGAEERAIWTVTIPISLAACPTTQCASIVSPCND	LANTHIPEPTIDE	54	training set
MAPAAVLTKPIAETTTAPAEDPFDVQVEVVTEIDAEQLPQACGTGDGCKSTCASSCASAV	LANTHIPEPTIDE	60	training set
MKKGTQLYLEALEALQEIKVEELDTFIGGGGRASNTISSDCRWNSLQAIFSCC	LANTHIPEPTIDE	53	training set
MKVVKEKKELFDLDVKVNARDMNNSESGPPNTSLIWCTDGCAKR	LANTHIPEPTIDE	44	test set
MFEKIETAWKNPEMRMEGVLESPVGEVSEEELAAAVGGSDVNPQTTWPCVIILTTTICD	LANTHIPEPTIDE	59	training set
MSRNQVMEELKMNHPAGAPMVEVSEDELNRIYGGGDVRAETTISCGAVLVTIGIYISKQKGCV	LANTHIPEPTIDE	63	training set
MDNEKYLQVVEDEELEQLVGGIGPGWVETLTKDCPWNMPVACVTIMGQRICKKCR	LANTHIPEPTIDE	55	training set
MALLDLQSMESDEMTGGGHGGGGSLASLLLCWSDASVVLCL	LANTHIPEPTIDE	41	training set
MVLLDLQGMETPGGAGSYGGGSTLTVLTCQSCRPSNLSIVLCH	LANTHIPEPTIDE	43	training set
MANNLFDLDVQVNKSQGSVEPQVLSIVACSSGCGSGKTAASCVATCGNKCFTNVGSLC	LANTHIPEPTIDE	58	training set
MNNEDFNLDLVTISKENNSGASPRVTSKSLCTPGCKTGILMTCAIKTATCGCHFG	LANTHIPEPTIDE	55	training set
MNKELFDLDINKKMETPTEMTAQTWTTIVKVSKAVCKTGTCICTTSCSNCK	LANTHIPEPTIDE	51	training set
MFTNNKEVVPSFEDLSLEEMYALQDDTGVEAEISPSTTSSAFCVGAGLGALTTLTIKKC	LANTHIPEPTIDE	59	training set
MSILDLQTMELPQDDAAPIDDTLASVNSTLSVLNCTNSTVSTIACL	LANTHIPEPTIDE	46	training set
MRREDVLAALENAHPAGEVLVELSHSELSRVYGGADVQPETTPVCAVAATVAASSATCAAVGGGIAVGVTIVLTIKSC	LANTHIPEPTIDE	78	training set
MKNTNIIDIKATEALQELSLEELDTIIGAKKGSGVVPTVSHDCHMNSWQFLFTCCS	LANTHIPEPTIDE	56	training set
MAILDLQTIELAETEVADIDDTLASVSSLSALNCTVSTVSTLLCL	LANTHIPEPTIDE	45	training set
MEKVLDLDVQVKGNNNTNDSAADERITSHFLCRFGCGKTGSFNSFCC	LANTHIPEPTIDE	47	training set
MKNQFDLDLQVAKNEVASKGVQPASGIICTPSCATGTLNCQVSLSFCKTC	LANTHIPEPTIDE	50	training set
MEAVKEKNELFDLDVKVNAKESNDSGAEPRIASKFLCTPGCAKTGSFNSYCC	LANTHIPEPTIDE	52	training set
MGFILDMQDLDTPEAPSNAMASGGGGGGGSTTASNASLLLPCSHSTVSLLAC	LANTHIPEPTIDE	52	discard
MPFEGDVSLVEEIAEQDFDGVAYGACTTNTFSLSDALGNHGGWCTLTKECQPNCN	LANTHIPEPTIDE	55	training set
MAEKVLNLQLVSVQVDETDEVDGMRFSTFSTNRCGNWSAFSWENC	LANTHIPEPTIDE	45	training set
MNDITDIEYTQVDLKNLVGNSFEEMSLEEMALTQGTGDVQPQSTPGCFFASLGIGVTISAWKC	LANTHIPEPTIDE	63	training set
MESTNEIINSWKNPKERDLNLLSHPAGSSFHELSTVEMEYISGGNGQVEPQATPATPTFSSVPCAQVSWAVSGAAASAVVSFVASAVANCRD	LANTHIPEPTIDE	92	training set
MSKFDDFDLDVVKVSKQDSKITPQWKSESVCTPGCVTGVLQTCFLQTITCNCHISK	LANTHIPEPTIDE	56	training set
MALLDLQAMEVDAEDEVKLQTCSSVVPVDCTSTFSVFC	LANTHIPEPTIDE	38	training set
MLNKENQENYYSNKLELVGPSFEELSLEEMEAIQGSGDVQAETTPVCAVAATAAASSAACGWVGGGIFTGVTVVVSLKHC	LANTHIPEPTIDE	80	training set
MKQHEKLGPSFEELSQEEMDFITGAKGEYTPNATPTVTTSSAPCISVSKVVSGAAVSWVVSFTASAWTKCRD	LANTHIPEPTIDE	72	training set
MMKEMTNHAGPSFEELEQEEMELVQGSGDVQAETTPVCFTVGLGIGSLVSASVC	LANTHIPEPTIDE	54	test set
MSKEYKFTKEELVEAWKDPQVREKLKDLPKHPSGKALNELSEEELAEIQGASDVQPETTPLCVGVIIGITASIKICK	LANTHIPEPTIDE	77	training set
MALLDLQTMESDEHTGGGGNSTLSLLSCVSAASVTLCL	LANTHIPEPTIDE	38	training set
MALLDLQILDSDEHTHTGASTLSLLSCVSAASVLLCL	LANTHIPEPTIDE	37	test set
MALLDLQGMELPVAERHGGGSQASLLLCGDSSLSITTCN	LANTHIPEPTIDE	39	training set
MYKGDVSLVEEIAEQDFDGVAYGACTTNTFSLSDALTNTGGWCTLTVECQPNCN	LANTHIPEPTIDE	54	training set
MGLTMSPQPQNNTNLFDLDLEIGVERSIAGPAITSVSYCTPGCTSEGGGSGCSHCC	LANTHIPEPTIDE	56	training set
MSVLDLQGMEAAPQTGGHGGGSSNSGHSCPSNLSLTLCNGGSGLSLLICH	LANTHIPEPTIDE	50	training set
MALLDLQGMELPAAGRTGGGSQASLLLCGDSSLSVTTCN	LANTHIPEPTIDE	39	training set
MDNEKKSQLQEESSDMDILGKKFEDLTQEEMKKIQGSGDVSPEDIGAFTTILTSKNPYNCK	LANTHIPEPTIDE	61	training set
MSKFDDFDLDVVKVSKQDSKITPQVRSKSLCTPGCITGPLRTCYLCFPTHVNC	LANTHIPEPTIDE	53	training set
MKNSKDVLNNAIEEVSEKELMEVAGGKKGPGWIATITDDCPNSIFVCC	LANTHIPEPTIDE	48	training set
MSKKVENWKKAIYSKSENLDNPAGDIFRELSDSELDGIMAGGTANTYCHCYSGKHSCGRACTITSECPIATIICC	LANTHIPEPTIDE	75	test set
MMKEMTNYAGPSFEELEQEEMELVQGSGDVQAETTPVCFTVGLGVGSLVSASVC	LANTHIPEPTIDE	54	discard
MENQDLELLAHLHALPETDPVGVDGDSFSGTCACVGLLTLLNTICIGISCA	LANTHIPEPTIDE	51	training set
MVLLDLQGLEAPAASDVASGGSTLTVLTCHSGKPSNLSVAICH	LANTHIPEPTIDE	43	training set
MALLDLQTMESDEHTATAGASTASLLSCVSTTSVLLCL	LANTHIPEPTIDE	38	training set
MKNTIKDFDLDLKTSEKRTAEPYVGSRYLCTPGSCWKLVCFTTTIK	LANTHIPEPTIDE	46	training set
MALLDLQTMESDEHTGGGANSTLSLLSCVSAASVTLCL	LANTHIPEPTIDE	38	training set
MLDIIKNRKKVKENLELPDTLLEEVEEHSAMGGINTWNTTATSTSIIISETFGNKGKVCTYTVECVNNCRG	LANTHIPEPTIDE	71	training set
MKNSKDILTNAIEEVSEKELMEVAGGKKGSGWFATITDDCPNSVFVCC	LANTHIPEPTIDE	48	training set
MQSNYDDQILDNLAELSDTEIEELLGAGWGSIFSFTHECNTNTMTQLFTCCF	LANTHIPEPTIDE	52	test set
MLNFKESAVTGAAFEDMSVAEMSRIQGSGDISPETTPACALIISKAITSAAVSFAFSVGVVKTVKGNC	LANTHIPEPTIDE	68	training set
MTADILVEMTDAELDATLGAGNGVFHTISHECYYNSWAFIFTCC	LANTHIPEPTIDE	44	training set
MALLDLQTLESDEHNGGGGASTLSLLSCVSAASVLLCL	LANTHIPEPTIDE	38	training set
MSNEDFNLDLVSVSKNSNSGASPRITSKSLCTPGCKTGALMTCPIKTATCGCHFGN	LANTHIPEPTIDE	56	training set
MTAAMLLDDAATADLSDFDLEIQLAVTGDLNGPLAPEAGFTNVTCPEGPVLTSGHYAVNQMMGPICCS	LANTHIPEPTIDE	68	training set
MESVLDLQAMEATEDAAEFASPGGSQASLLLCGDSGLSVLTCR	LANTHIPEPTIDE	43	training set
MNKNFRNQVTKEAVGSLENELKNQEMNDINGGVSPAVVSALTAISGLSHSVTSHVSKHRKCGAYWTISKECFGKRC	LANTHIPEPTIDE	76	test set
MKNLKKLSKSDLKSVYGGEPKQYCTYCEWAGKVICSEIPIVQCP	LANTHIPEPTIDE	44	training set
MSVDIIRAWKDEEYRQSLSTEQLQQLPANPAGLIELSDEDMSSVSGGCTTCGNPLHTPIIQCKPVFGELSDISV	LANTHIPEPTIDE	74	training set
MFGPRPRLGAFESVHPNTQGRSMRTEIVLSQDAPELDLDLDLRVSDLPEQAESFGQGTYTSPSSYAIGTRCPVCC	LANTHIPEPTIDE	75	training set
MNNELIVQAWKNPQICSNFANLPVHPAGEALVPFDLNLGDVQAETTPATPWIIASSEPCGYVASTIIISVTSC	LANTHIPEPTIDE	73	training set
MKNNKIHLEALEALQELKMEEIDNLLGGAGHGVNTISAECRWNSLQAIFTCC	LANTHIPEPTIDE	52	training set
MSITDIVASWKDEYARAAAPETAEAHPAGVVELHGDQLETVAGGAAATTGHTTACCHCVC	LANTHIPEPTIDE	60	training set
MKNSKDVLNNAIEEVSEKELMEVAGGKKGSGWFATITDDCPNSVFVCC	LANTHIPEPTIDE	48	training set
MTNFNSNEKFCGKSLKSLSADEMSLIYGASDGAEPRWTPTPIILKSAAASSKICISAAVSGIGGLVSYNNDCLG	LANTHIPEPTIDE	74	training set
MLNKENQENYYSNKLELVGPSFEELSLEEMEAIQGSGDVQAETTPACFTIGLGVGALFSAKFC	LANTHIPEPTIDE	63	training set
MALLDLQNMESEEMHDGGGHGGESSASLLSCVSAISVLLCL	LANTHIPEPTIDE	41	training set
MALLDLQGLEAPGGKGGGGGSTLTVLGCASHTPSNVSLLLCH	LANTHIPEPTIDE	42	training set
MSVDIIRAWKDEEYRQSLSTEQLQQLPANPAGLIELNDEDMSSVSGGCTTCGNPLHTPIIKCKAVFGELGDISA	LANTHIPEPTIDE	74	training set
MTLLELQGLTPEPSGAPAGSRASKGCNNRYSALSLLCKVSIL	LANTHIPEPTIDE	42	training set
MTLLDLQSMETPKEETTGDVATGSRASLLLCGDSSLSVTTCN	LANTHIPEPTIDE	42	training set
MENHDIDLLARLHALPETDPVGVDGAPFAATCECIGLLTLLNTVCIGISCA	LANTHIPEPTIDE	51	training set
MNKELFDLDINKKMETPTEMTAQTVPTTIFVSRSVCKTLTCICTISCSNCK	LANTHIPEPTIDE	51	training set
MIGSTAGGSAALAERPAVSEDDFALDVRVVVATHPVGKLMCNTGDGCGNTCQGTASACNSYVSDPV	LANTHIPEPTIDE	66	training set
MSTTIVTAAATAPETGTDDLFDLDISVIESGPAIPELLRSTSDNCGGTCASACTSCKS	LANTHIPEPTIDE	58	training set
MSNVDIIRAWKDPEYRASLSEAEKAQLPEHPAGLIELSDEDMSSLGGGLVAEPTHTKTCRHCCKPKPELGDASIELY	LANTHIPEPTIDE	77	training set
MTALLESTDIDVAQIWRDPAFRASLGMDELETLPASPIGELRAVNVGEITSGESAVVSILSPAGCLISFACTWPCCAW	LANTHIPEPTIDE	78	test set
MAQILDLQSMTIDRAPGAEPNSVASWWECCSNGSLFNCC	LANTHIPEPTIDE	39	training set
MALLDLQNMESEANTGHGGGGQSTVSLLSCVSTASVLICL	LANTHIPEPTIDE	40	training set
MEKVLDLDVQVKGNNNTNDSAGDERLTSYSLCSFGCGKTGSFNSFCC	LANTHIPEPTIDE	47	training set
MTNATLAQAELPMALDEDDFAPLDVRVVIAEHPYGKLMCSTGDGCGPTCQGGASACNSFVEDSA	LANTHIPEPTIDE	64	training set
MKKEYELMNTIQEVSLDELEQIIGAGKNGVFKTISHECHMNSFQFFFTCCS	LANTHIPEPTIDE	51	test set
MALLDLQTMESEEYTGGQSTLSLLSCISAASVLLCL	LANTHIPEPTIDE	36	training set
MTAVQTERPTAPAQPDLATIDETDPFGLDITFIEGTPATETVLMCSTGDTCGSSCPSACTTS	LANTHIPEPTIDE	62	training set
MALLDLQAMDAPEHGGGGGSTISLTLCASQASVLLCL	LANTHIPEPTIDE	37	discard
MKKEFLALEVMTEEELKELAGGSEATPMTVTPTTITIPISLAGCPTTKCASIVSPCND	LANTHIPEPTIDE	58	training set
MKNISEKSVGLSMKKLDATEMEKIYGASGVDTRTHPTVVVVSRASSKFCVTVAASAVLSYNMNKC	LANTHIPEPTIDE	65	test set
MSKKLENWKKAIYFKDENIDNPAGDIFRELSDSELDGMMAGGTANSFCHCYSGKDSCGRGCTITTECPIATIICC	LANTHIPEPTIDE	75	training set
MNNIKPEIYVQTATDQEITLLIGGAGSGFVKTLTKDCPGFLSNVCVNIGFISGCKNCKNKN	LANTHIPEPTIDE	61	training set
MGFILDMQELDTPEAPSNAMASGGGGGGSTTASNASLLLPCSHSTVSLLAC	LANTHIPEPTIDE	51	discard
MNLVRAWKDPEYRATLSEAPANPAGLVELADDQLDGVAGGTTWACATVTLTVTVCSPTGTLCGSCSMGTRGCC	LANTHIPEPTIDE	73	training set
METEKYLQVVEDEEIEQLVGGVGPGWIATLTKDCPANKPYACITIAGQTICKKCR	LANTHIPEPTIDE	55	training set
MADNLFDLDVQVNKSQGSVEPQVLSIVACSSGCGSGKTAASCVATCGNKCFTNVGSLC	LANTHIPEPTIDE	58	training set
MALLDLQGMQTPPQTRGGGSSTSGHSCPSNLSVTLCGGSSGLSVLICH	LANTHIPEPTIDE	48	training set
MRSEFSKLKKEVKQEQVTWFEEVVDQEFDDDVFGACTTNTFSLSDYWGNKGSWCSLSHECMAWCK	LANTHIPEPTIDE	65	training set
MTDVNTQQTDMESFEDLFNLDVRVQAGGRSARRCNPTNDGCSNSCTSVGCPR	LANTHIPEPTIDE	52	training set
MGFILDMQDLETPEAPSNAMASGHGGGGGGGSTTASNASLLLPCSHSTVSLLAC	LANTHIPEPTIDE	54	discard
MKQSNEMLELIQEVSLDELDQVIGGMGKGAVGTISHECRYNSWAFLATCCS	LANTHIPEPTIDE	51	training set
MTLSTESESASPKQAHDTIADVAADSPAPEDFDLDIRFAESGPVVEELMRPTDDGCGSTCESACTPTCP	LANTHIPEPTIDE	69	training set
MEKVLDLDVQVKGNNNTNDSAGDERITSHLFCSFGCEKTGSFNSFCC	LANTHIPEPTIDE	47	training set
MINEKNLFDLDVQVTTASGDVDPQITSISACTPGCGNTGSFNSFCC	LANTHIPEPTIDE	46	training set
MENLSVVPSFEELSVEEMEAIQGSGDVQAETTPACFTIGLGVGALFSAKFC	LANTHIPEPTIDE	51	training set
METEKYLQIVEDEEIEQLVGGAGPGWVETLTKDCPWNVPVACVTIMGQRICKKCY	LANTHIPEPTIDE	55	training set
MNLFDLQSMETPKEEAMGDVETGSRASLLLCGDSSLSITTCN	LANTHIPEPTIDE	42	training set
MTLLELQAIDPTVATGGGKPPKRHSNFSVTLCAGGASNLSLLLCSGK	LANTHIPEPTIDE	47	training set
MALLDLQTIETEEATTGGNSTVSLLSCISAASVLLCL	LANTHIPEPTIDE	37	training set
MEAEKIVGMQFEDLSKEEMNFIAGGNNNARISPTIVTPVTPYTSYVASAAGSAALSAVSGLVSYTKKCF	LANTHIPEPTIDE	69	training set
MENKTKLVGKSFEELSVEEMMELQGAADIEPRSAIVVISTIEVSEAISVLVSTISAATVSIANSKKKCK	LANTHIPEPTIDE	69	training set
MSPVLMADRTESVDFALDDAELELDMRVVESTTRIAIMMCDTSDGCGNSCSTSACNTSSNDPS	LANTHIPEPTIDE	63	training set
MEKLNHNAVTSLNEVSDSELDTILGGSRWWQGVLPTVSHECRMNSFQHIFTCC	LANTHIPEPTIDE	53	test set
MRKYNIIQNWKNPMKKTEVGTIENPVGNIFEEISDTDLQMAGGEDASNYSLIIDIDRMSKILGNKGRICTYTLECTAGCNLNPNKK	LANTHIPEPTIDE	86	training set
MTNFNSNEKFCGKSLKSLSADEMSLIYGASDGAEPHWTPTPIIVKSAAASSKVCISAIISGIGGLVSYNKDCLG	LANTHIPEPTIDE	74	training set
MALLDLQTMESDEHTGGGNSTLSLLSCVSAASITLCL	LANTHIPEPTIDE	37	discard
MTNEEIIVAWKNPKVRGKNMPSHPSGVGFQELSINEMAQVTGGAVEQRATPTLATPLTPHTPYATYVVSGGVVSAISGIFSNNKTCLG	LANTHIPEPTIDE	88	training set
MSTTIVTAAATAPETGTDDLFDLDISVIESGPVIPELLRSTSDNCGGTCASACTSCKS	LANTHIPEPTIDE	58	training set
MNNVKNLFDLDVQVTTTSSDVDPQITSVSLCTPGCGDTGSWNSFCC	LANTHIPEPTIDE	46	training set
MVLLDLQDLEPDQHINEDPGGGASFVSLLLCDSAVSIQVCL	LANTHIPEPTIDE	41	training set
MNRTTKAWKDPVFRAGLSSEELSALPAHPAGAIELTDQRLDSVVGGGLTDTWVTCGHKTCRTCFTCDWLCG	LANTHIPEPTIDE	71	training set
MKNISEKSVGLSMKKLDTTEMEKIYGASGVDTRTHPTVVVVSRASSKFCVTVVGSVLLSYNMDKC	LANTHIPEPTIDE	65	discard
MPKFDDFDLNLKEANDNQVEPMVGSRYMCTPGSCWKWVCFTTTAK	LANTHIPEPTIDE	45	training set
MTAVQTERPTAPVQSDLATTDETDPFGLDITFIEGTPATETVLMCSTGDTCGSSCPSACTTS	LANTHIPEPTIDE	62	training set
MKKEGSMQMKNENIIGKSFVELDQAEMDFISGAEGTVEPQATPTISSVACIRVSVGVSAAGASFVTSFVASATSNCD	LANTHIPEPTIDE	77	training set
MVLLDLQAMELPGGGHPGGGGHGGGGSTLTLLGCASQTPSNLSLLLCH	LANTHIPEPTIDE	48	training set
MAILDLQTLELPETDAHPIDDTLASVSSLSALNCGTSTVSTLVCL	LANTHIPEPTIDE	45	test set
MALLDLQTIETEERTDGGGNSTLSLLSCISAASVLLCL	LANTHIPEPTIDE	38	training set
MNLFDLQSMETPKEEAMGDVESGSRASLLLCGDSSLSITTCN	LANTHIPEPTIDE	42	training set
MPPNLTLDAPDLDTEVGEDEFDLDMTVVEATTPIVVLMCDTDDGCGSTCSNSACATGSNDPS	LANTHIPEPTIDE	62	training set
MMNATENQIFVETVSDQELEMLIGGADRGWIKTLTKDCPNVISSICAGTIITACKNCA	LANTHIPEPTIDE	58	training set
MSKGYKFTKEELVEAWKDPQVREKLKDLPNHPSGKALNELSEEELAEIQGASDVQPETTPLCVGVIIGITASIKICK	LANTHIPEPTIDE	77	training set
MNLLELQSMETPKEEATGDVATGSRASLLLCGDSSLSVTTCN	LANTHIPEPTIDE	42	training set
MEHVLELQALEAPEALEGQGLDHHGHSHYSAYCGDSTLSLLLCY	LANTHIPEPTIDE	44	training set
MSNADIIRAWKDEDYRASLSDEQKALLPENPVGLIELSDEDLSSVSGGCTPCGNPLHTRIACFADTIATDIA	LANTHIPEPTIDE	72	training set
MGFILDMQDLETPEAPANVLAGGSSGGGGGSTTASNASLLLPCSHSTVSLLAC	LANTHIPEPTIDE	53	test set
MTLLDLQGMSVSTKNGGHGGGGGSQASLLLCGDSSLSVTTCN	LANTHIPEPTIDE	42	training set
MTLLDLQSMETPKEEVTEGALLGGGGGGSRASLLLCGDSSLSITTCN	LANTHIPEPTIDE	47	training set
MTNEQIVKAWKDPEFRSTLENVPYHPAGDIAAMNAIHGDVQPETTPTTITVSSEPCGFTIGTVIITLTDGCF	LANTHIPEPTIDE	72	training set
MALLDLQNLEVPGGHTGGGGGGSNLSLLACTPHENSSLSLICG	LANTHIPEPTIDE	43	training set
MSILSLQALETPEETTEYLSVLSSLSAVNCTNSTVSTLLCL	LANTHIPEPTIDE	41	test set
MALLDLQAMDTPAEDSFGELATGSQVSLLVCEYSSLSVVLCTP	LANTHIPEPTIDE	43	training set
MKNDFVIGKSLKELSLEEMQLVYSGTDGADPRSTIICSATLSFIASYLGSAQTRCGKDNKKK	LANTHIPEPTIDE	62	training set
MSIVLDLQGLETPAEEAALGTSTVSNACGQ	LANTHIPEPTIDE	30	training set
MTAIQTEKPATPAQADLMAPDDPFALDITFIEGTPATETVLMCSTGDTCGSSCPSACTTS	LANTHIPEPTIDE	60	training set
MIAMKNSKDILNNAIEEVSEKELMEVAGGKRGPGWIATITDDCPNSVFVCC	LANTHIPEPTIDE	51	training set
MVLLDLQGMETPGGGGHGGGSTLTVLTCQSGRPSNLSLVLCH	LANTHIPEPTIDE	42	training set
MTTQDLVKAWKNPNFRSADVVHPAGDALVEVGAEELARVHGGLVEPQATPTITIPITIISGLFCFPTTVH	LANTHIPEPTIDE	70	training set
MALLDLQGLEAPTGGGGGGGGGSTLTVLGCGSAKPSNLSLLLCH	LANTHIPEPTIDE	44	training set
MTNFNSNEKFCGKSLKSLSADEMSLIYGASDGAEPRWTPTPLILKSAAASSKVCISALVSGVGGLVSYNNDCLG	LANTHIPEPTIDE	74	training set
MREEIIRAWKNPERRTADAAAHPSGTSLMELTDGDLAFVQGAGDVNAESMTPGTITIPIWIYFGHRYSILFC	LANTHIPEPTIDE	72	training set
MSKNEKLNKLRNQEFDTKELIGLVDENELKKVAGAGDVNPEIMSDPVTLTIVVPIFTNKLCPTVPCTLKG	LANTHIPEPTIDE	70	training set
MVLLDLQTLEAPGGGHGGGGGSTLTVLGCESYKPSNLSLLLCH	LANTHIPEPTIDE	43	training set
MALLDLQALETDEAPEFGGGGGGSRASLLLCGNSSLSLVTCN	LANTHIPEPTIDE	42	training set
MSLLDLQNLDVELDIDEGDGGGHGGGSSLSLLLCDSVASLTLCL	LANTHIPEPTIDE	44	training set
MALLDLQAMDTPTEEAAGDLAHGSQVSLLICEYSSLSVVACTP	LANTHIPEPTIDE	43	training set
MPKYDDFDLNLKQTSASNQKDTRVTSVMACTPGTCNNKCPNTNWLCSNVCVTKTCWTCA	LANTHIPEPTIDE	59	training set
MQQVLNLQELETEHTVDENGVIIASDFSTFACDSNVSVVVC	LANTHIPEPTIDE	41	training set
MDFILDLQDMETPEAASNAMASGGSSSGGGGSTSASGLSLLGCGAHSTVSLVIC	LANTHIPEPTIDE	54	training set
MNTNEKKDTTLSVTGPSFEELTMEEMASIQGCGDVKPETTPVCVAGFTIGLGGGSIVSAIYC	LANTHIPEPTIDE	62	training set
MEAVKEKNDLFNLDVKVNAKESNDSGAEPRIASKFICTPGCAKTGSFNSYCC	LANTHIPEPTIDE	52	training set
MTLLDLQSMETPKEEVTGDVASGSRASLLLCGDSSLSVTTCN	LANTHIPEPTIDE	42	training set
MRTEIVLSQDAPELDLDLDLRVSDLPEQAESFGQGTYTSPSSYAIGTRCPVCC	LANTHIPEPTIDE	53	training set
MKKNYRNPMTRPENFMNPAGNVMKEIKEADLNNFSAGAGEPRVSDGSQFCTSTKECNWGTIMFVCC	LANTHIPEPTIDE	66	training set
MVLLDLQSLETPGGGHGGGGGSTLTVLGCESGRPSNLSLLLCH	LANTHIPEPTIDE	43	training set
MSPTTTARVSGLTDDADFALDLRVVEAAEPIAALQQSTSDNCGSTCTGTACISYTGDPV	LANTHIPEPTIDE	59	training set
MEHVLELQALEAPEALEGQGLDHHGHSHYSAWCGESTLSLLLCY	LANTHIPEPTIDE	44	training set
MSVQSEEAVATVPAAAEEQERAVDGWDLDVSIVESGPEADRLIQMTDDGCGQTCESACSATCP	LANTHIPEPTIDE	63	training set
MTLSTESESASPKQDHDTIADVAAESPAPEDFDLDIRFAESGPVVEELMRPTDDGCGSTCESACTPTCP	LANTHIPEPTIDE	69	training set
MNSLLAVSNDPFELDVQIVTEGPVAAALLADTDDGCDTVKGSDC	LANTHIPEPTIDE	44	training set
MSQKKDHILRAWRDPEYFNSLSAEARASLPANPAAELELSDEVLESISGADSCERFGSYHCTPCPPYVCL	LANTHIPEPTIDE	70	training set
MSNIDIIRAWKDEEYRNSLSEEQLSQLPENPAGMVELSDKEMETFMGGGDVHIAMSCCGTKATNQSKKLPIQDSSILAEVSSLEKG	LANTHIPEPTIDE	86	training set
MSMQTAKNNVLSLQRMKAANAGDTGNGSYASFFCKKNSTISVFTCVING	LANTHIPEPTIDE	49	training set
MAQQIQVDVPAVPVTADDDFDLDVSIVEVADAASLQVLTDDGCGSTCGACTTGVH	LANTHIPEPTIDE	55	training set
MSKKEMILSWKNPMYRTESSYHPAGNILKELQEEEQHSIAGGTITLSTCAILSKPLGNNGYLCTVTKECMPSCN	LANTHIPEPTIDE	74	test set
MANNNFDLDVQMKSVNSVNANLGNYTSQCYSSQCYSSKCYSDSCYSSNCYTGRHMCGYTHGYSC	LANTHIPEPTIDE	64	training set
MSNIQHITKAQPDTEVSGFELDVTLVEVADPAGLVNLTDDGCGETCGACTTNVA	LANTHIPEPTIDE	54	training set
MSKVNVDNVIKHLDFKKIEEEKKNGKSLEEILKGIDLKPIIREEMTKTNPDVEEKEIDEVVREIDLSKVMEGINKVKNRVEELAGKAFEDLSEEDMRMLQGAGDMEGEFTPATITTSSYPCLGAISAISGGVLSYAKC	LANTHIPEPTIDE	138	training set
MTILDLQGMETAHHGRPRRSGASKYCGGTSQLSLLLC	LANTHIPEPTIDE	37	discard
MALLDLQSLESDELHGGGHGGSNASLLLCWSTASVALCL	LANTHIPEPTIDE	39	training set
MNLFDLQSLETPKDEAIGDVETGSRASLLLCGDSSLSVTTCN	LANTHIPEPTIDE	42	training set
MNAKTNKEINYEAVATLQEVKIDDLDILLGGAGHGVNTISAECRWNSLQAIFTCC	LANTHIPEPTIDE	55	training set
MEKVLDLDVQVKGNNNTNDSAADERLTSYSLFSFGCGKTGSFNSFCC	LANTHIPEPTIDE	47	training set
MALLDLQTMETEEYTGGASVASLLLCASQASVTLCL	LANTHIPEPTIDE	36	training set
MALLDLQTMESDEHTSGGGNSTVSLLSCISAASVLLCL	LANTHIPEPTIDE	38	training set
MRTEIVLSQDAPELDLDLDLRVSDLPDQAESFGQGTYTSPSSYAIGTRCPVCC	LANTHIPEPTIDE	53	training set
MVLLDLQTLEAPTGGGGGGGGSTLTVLGCESCKPSNLSLLLCH	LANTHIPEPTIDE	43	training set
METEKYLQVVEDEEIEQLVGGAGPGWVETLTKDCPWNVPVACVTIMGQRICKKCY	LANTHIPEPTIDE	55	training set
MEKIIGQSFEELSKKEMEAMQGSGDVQAETTPVCAISATVAASSAACAGVGAGIGTGITIVLTFKRC	LANTHIPEPTIDE	67	training set
MSALTATPTPAGLIATGRDRALSLDGDLFDLDLRVQVPVTDESLWSMTNDGCGQTCETACTQSCTDNG	LANTHIPEPTIDE	68	training set
MALLDLQTMEADETTGTGGPSSLSVLSCVSAASITLCL	LANTHIPEPTIDE	38	training set
MFEQRKNNWRNFIMNNEDFNLDLVTISKENNSGASPRVTSKSLCTPGCKTGILMTCAIKTATCGCHFG	LANTHIPEPTIDE	68	test set
MSYILDLQSMEGPVTENGDQPMQESRLSVITCGGLSQLSALLCD	LANTHIPEPTIDE	44	training set
MTNLLKEWKMPLERTHNNSNPAGDIFQELEDQDILAGVNGACAWYNISCRLGNKGAYCTLTVECMPSCN	LANTHIPEPTIDE	69	training set
MTLLDLQSMETPKEETAEVAMTGGGSRASLLLCGDSSLSITTCN	LANTHIPEPTIDE	44	test set
MKNNNKICQDALESLQELKLEEVDELLGGAGHGVNTISAECRWNSLQAIFSCC	LANTHIPEPTIDE	53	training set
MSLLDLQEMELSTDSAEETVLGSGQSQHCSDASWVFC	LANTHIPEPTIDE	37	training set
MEELKNTVVTLSDEELKEAAGAAGCGWACTITDDCPNSVFVCC	LANTHIPEPTIDE	43	training set
MAAEVLNLQLVSVQVDETDEVDGMRFSTFSTNRCGNWSAFSWKNC	LANTHIPEPTIDE	45	training set
MSEKQIERTIRAWKDPEFRKTLSDVADHPSGSIEARQLSMLGSEDNVNPMTTPVSPAPTVVIRVSLKVCPTFKIKCKV	LANTHIPEPTIDE	78	training set
MEKVLDLDVQVKANNNTNDSAGDERITSVIGCTPGCGKTGSFNSFCC	LANTHIPEPTIDE	47	training set
MVLLDLQGMEAPGRKGGGGGSTLTVLTCGSVKPSNLSVALCH	LANTHIPEPTIDE	42	training set
MSYILDLQSMETPVAESADQAYSVSYLSLLLC	LANTHIPEPTIDE	32	training set
MALLDLQTLEAPTGGGGGGSNLSLLGCTPHENSSLSVLCGN	LANTHIPEPTIDE	41	training set
MSRSQVMEELKMNHPAGAPMVEVSEDELTRVYGGGDVQPETTPGCLYTGGVVIGVTLSLWKC	LANTHIPEPTIDE	62	training set
MGTILELQELDAPNELAYSDSNYGGSSNLSLLAACAHSTVSLLTCQ	LANTHIPEPTIDE	46	training set
MTLLDLQSMETPKEEVTEGALHGGGGGASRASLLLCGDSSLSITTCN	LANTHIPEPTIDE	47	training set
MEHVLELQALEAPEALEGQGLDHHGCSHYSAWCGESTLSLLLCY	LANTHIPEPTIDE	44	training set
MGNIAPAQSHNEVNLFDLDLEIGVEKSVAGPAITSVSYCTPGCTSEGGGSGCSHCC	LANTHIPEPTIDE	56	training set
MSLLELQGFDPDVVANGGGGGGSRLSALVCGHAPSNLSLTICGSIK	LANTHIPEPTIDE	46	training set
MEELKSVVMTVTDEELQEAAGAAGCGWLCTVTDDCPNSVFVCC	LANTHIPEPTIDE	43	test set
MEMVLELQELDAPNELAYGGSNYGGESNLSLLAGCAASTLSLATCH	LANTHIPEPTIDE	46	training set
MTLLDLQTLETPAEEITGELATGGGSRASLLLCGDSSLSVTTCN	LANTHIPEPTIDE	44	training set
MENHDIELLAHLHALPETDPVGVDGAPFAATCECVGLLTLLNTVCIGISCA	LANTHIPEPTIDE	51	training set
MALLDLQTLESDEYTHTGASTASLLSCVSAASVLLCL	LANTHIPEPTIDE	37	training set
MAILDLQTMEPPESEAAPIDDVLATGSSLSVLNCTVSTVSTLLCL	LANTHIPEPTIDE	45	training set
MSKFDDFDLDVVKVSKQDSKITPQWKSESVCTPGCVTGLLQTCFLQTITCNCKISK	LANTHIPEPTIDE	56	training set
MVLLDLQAMELPGGGSGHGGGGHGGGGSTLTLLGCASQTPSNLSLLLCH	LANTHIPEPTIDE	49	training set
MEKVLDLDVQVKGNNNSNDSAGDERITSHSLCTPGCAKTGSFNSFCC	LANTHIPEPTIDE	47	training set
MALLDLQTLESEEYTGGQSTLSLLSCISAASVLLCL	LANTHIPEPTIDE	36	discard
MEKVLDLDVQVKGNNNTNDSAADERITSHFLCSFGCGKTGSFNSFCC	LANTHIPEPTIDE	47	training set
MANPFDLDVEVVKTEANDVEPDFTSVSFCTPGCGTQVALTASVVNHKDRLNFNLIKTTLKDPQAILFFILT	LANTHIPEPTIDE	71	training set
MALLDLQALDTPAEEAFDEVATGSQVSLLVCEYSSLSVVLCTP	LANTHIPEPTIDE	43	training set
MSKKVIQVWKDEDFRLSMTEEERARFPDNPAGLLELTDEALDALVHGAAGVNASCGWSSCNRTN	LANTHIPEPTIDE	64	test set
MNRQAALLSLDMENPAGMALIELSNEELKRVHGGADVQPETTPLCGFFVGVGIGVILSVAKC	LANTHIPEPTIDE	62	training set
MKNEVSKQEQVTWFEEVVDQQFDDDVFGACTTNTFSLSDYWGNKGGWCTATHECMSWCK	LANTHIPEPTIDE	59	training set
MALLDLQAMDTPAEEAAGDLATGSQVSVIACEYSSLSVLVCTP	LANTHIPEPTIDE	43	training set
MDFILDLQDLETPESTSAMASGGSGGGGSTTASNASLLLPCSHSTVSLLAC	LANTHIPEPTIDE	51	training set
MEEILELQLMENEKFEPVLMGMSSQSNSCFLCNTAK	LANTHIPEPTIDE	36	training set
MRKFDRTNMKYNNPAGDLLTELEAADLTSNKVDSLASSGVVCTISVECGSIFTLACC	LANTHIPEPTIDE	57	training set
MENEKYLQVVEDEELEQLVGGIGPGYIETLTKDCPRVTPQICVPINGIWTCKRCY	LANTHIPEPTIDE	55	test set
MINEKNLFDLDVQVTTATGDVDPQITSISACTPGCGNTGSFNSFCC	LANTHIPEPTIDE	46	training set
MSLLDLQTMDTPQEEAFGDLATGSQVSLLVCEYSSLSVVLCSP	LANTHIPEPTIDE	43	training set
MAEEVLNLQLVSVQVGETDEVDGMRFSTFSTNRCGNWSAFSWENC	LANTHIPEPTIDE	45	training set
MSEKMYELAGDLSKELEEISIQSINGGSDVDVRGIGISSGNDGGVCTLTWECGKCPTVTCWSWSC	LANTHIPEPTIDE	65	training set
MSVDIIRAWKDEEYRQSLSTGQLQQLPANPAGLIELNDEDMSSVSGGCTTCGNPLHTPIIKCKAVFGELGDISV	LANTHIPEPTIDE	74	training set
MSIIETWKNPALRMNSQVVNPAGDLMEELSDDEMEMLAGGCAWYDISCKLGNKGAWCTLTVECQSSCN	LANTHIPEPTIDE	68	training set
MPQDITLLEEISEQDLSQVNGGTAFPGWYSKVIGNRGRVCTVTVECMSVCQ	LANTHIPEPTIDE	51	training set
MAENLFDLDVQVNKSQGSVEPQVLSIVACSSGCGSGKTAASCVETCGNRCFTNVGSLC	LANTHIPEPTIDE	58	training set
MALLDLQGLEMAPADRTGGGSSASLLLCGDSGLSVTTCN	LANTHIPEPTIDE	39	training set
MNKNMNTAGPSFEELTVEEMEMIQGSGDVQAETTPVCAIAATAAASSAACGYVGGGIFTGVTVVVTLKSC	LANTHIPEPTIDE	70	training set
MANPNAGILAEIDDQNLQKIAFGADTSPNTITGMPCIGISQALGNPGQVCTLTVECQDGC	LANTHIPEPTIDE	60	training set
MNLLDLQSMETPKEEATGDVATGSRASLLLCGDSSLSITTCN	LANTHIPEPTIDE	42	training set
MTTAVLDSVTTPAELPVEDLADDDFQLDVRVVVSHSPVYNFNCPTSDGCGNTCANGASSCASTIEDAA	LANTHIPEPTIDE	68	test set
MQRNAEVLALEAIDNVSDEELETLVGAGGIVPTLTKDCPKTVSGVDISAGPVSVSKNCD	LANTHIPEPTIDE	59	training set
MKNQFDLDLQVAKNEVASKGVQPASGLICTPSCATGTLNCQVSLSFCKTC	LANTHIPEPTIDE	50	training set
MEKAFDLDLEVVHTKAKDVQPDFTSVSFCTPGCGETGSFNSFCC	LANTHIPEPTIDE	44	training set
MTLPLALDLADDHGEIAAEEFELDLRVVESTTPIVTMMCSTSDGCGNTCSTSACSSSSYDPF	LANTHIPEPTIDE	62	training set
MAEEVLNLQLVSVQVNETDEVDGMRFSTFSTNRCGNWSAFSWENC	LANTHIPEPTIDE	45	training set
MSKKVENWKKAIYSKSENLDNPAGDIFRELSDSELDGIMAGGTANTYCHCYSGKHSCGRACTVTTECPIATIICC	LANTHIPEPTIDE	75	discard
METEKYLQVVEDEEIEQLVGGIGPGWVETLTKDCPWNQPFACITIAGQRICKKCR	LANTHIPEPTIDE	55	training set
MTRNTVVPSHTRVRPQPPEATDGFDLDVSLVEVADPAGLVNLTDDNCGSTCGACTTNVA	LANTHIPEPTIDE	59	training set
MALLDLQVMETPEEEGFQDIATGSQVSLLICEYSSLSVTLCTP	LANTHIPEPTIDE	43	training set
MSINEKSIVGESFEDLSAADMAMLTGRNDDGVAPASLSFAVSVLSVSFSACSVTVVTRLASCGNCK	LANTHIPEPTIDE	66	training set
MKSAEESSGNVLEELNNAQLGMISGGKKIKKSSSGDICTLTSECDHLATWVCC	LANTHIPEPTIDE	53	training set
MSNIDVVRAWKDEQYRMSLTTEERAQLPQNPAGMVELTDSDLEGVAGGYAEAVDIDVSVTKTSCCTYSTTATACC	LANTHIPEPTIDE	75	training set
NEKNLFDLDVQVTTASGDVDPQITSISACTPGCGNTGSFNSFCC	LANTHIPEPTIDE	44	training set
MLKDFDLNLKMETGSSDDKEPRITSVAYCTPGCLTGELCGSSECGLTRSCTNTWLCS	LANTHIPEPTIDE	57	training set
MSNELNNLVGLSFTELNQEEMDFISGAEGTVEPQATPTIASPFTPYAIEISIGATVSAVSGLVSYTKDCL	LANTHIPEPTIDE	70	test set
MNEHQIDADGFDLDVEVVESGPRLDALLNLTGDNCGTTCESACSTTCA	LANTHIPEPTIDE	48	training set
MELVLELQAMETPEVLDGGHGGGGCGTSNLSLLAGCAHSTLSLLTCW	LANTHIPEPTIDE	47	training set
MNLFDLQSMETPKEEAMGDVETGSRASLLLCGDSSLSVTTCN	LANTHIPEPTIDE	42	training set
MNLTSGKSLNVNEVSKLVGKSFEELSLEEMAQSQGGGEVVALSGPPCFLLTAGSALLLTFWQCKN	LANTHIPEPTIDE	65	training set
MAKFDDFDLDIVVKKQDDVVQPNVTSKSLCTPGCITGVLMCLTQNSCVSCNSCIRC	LANTHIPEPTIDE	56	training set
MALLDLQNMESDENTGGHGGGGQSTVSLLSCVSTASVLICL	LANTHIPEPTIDE	41	training set
MALLDLQGMELPAIERNGGGSQASLLLCGDSSLSITTCN	LANTHIPEPTIDE	39	training set
MNTDVLVEMTDTELDAILGAGDGVVKTLTHECHLNSFTWFLRCC	LANTHIPEPTIDE	44	training set
MTNFNSNEKFCGKSLNSLSADEMSLIYGASDGAEPRWTPTPIILKSAAASSKVCISAAVSGIGGLVSYNNDCLG	LANTHIPEPTIDE	74	training set
MKKESIVRAWKDPAFRASLSAEERASLPESPSGRALTELDESELLGVTGGKAALEPSTGCTDGVPTCGIVPFCDLEVA	LANTHIPEPTIDE	78	training set
MENEKYLQVVEDEELEQLVGGIGPGWVETITKDCPWKMPVACVTIMGQTICKKCR	LANTHIPEPTIDE	55	training set
MENNDLELLARLHALPETDPVGVDGVAFGATCECVGLLTLLNTVCIGISCA	LANTHIPEPTIDE	51	training set
MRDEENNETLINNEQVAWFEEVADQSFDDDVFGACTTNTFSLSDYWGNKGNWCTATHECMGWCK	LANTHIPEPTIDE	64	test set
MSVLNLQALETPEETTEYMSVISSLSVVNCTNSTVSTLLCL	LANTHIPEPTIDE	41	training set
MANPNVGILEEIDDQNLDAVSAAGQGWGTIVSSLSCYGASYVLGNNGNFCTATAECQNNCK	LANTHIPEPTIDE	61	training set
MNRYQVLSALKENHPAGAPMVEVSAEELARVYGGGDVQAETTPVCAAAVASSANCAAGAGLVVGGAISYFWC	LANTHIPEPTIDE	72	training set
MSIQLDDPVLAVPPQAGRDQEEDFTTWDLDISIVESGPAADRLIRMTDDGCGTTCETACSTTCP	LANTHIPEPTIDE	64	training set
MALLDLQTMETEEYTGGGSVASLLLCASQASITLCL	LANTHIPEPTIDE	36	training set
MALLDLQTMESDELNGGGGASTVSLLSCVSAASVLLCL	LANTHIPEPTIDE	38	training set
MGKLDDFDLDVKVKINSKKGIKPSYLSLTPKCTSLCPTNVFVCISKRCK	LANTHIPEPTIDE	49	training set
MSKNKIVRSWKDPIYREKVADVTSPVGNVLDEVSEEELYIAGGDVDPQTALTYSTCHWISPAMGNDGHLCTATVECQPNCN	LANTHIPEPTIDE	81	training set
MSKGYKFTKEELVEAWKDPQVREKLNDLPKHPSGKALNELSEEELAEIQGASDVQPETTPLCVGVIIGLTTSIKICK	LANTHIPEPTIDE	77	training set
MSEINTKAIVGDTFEDMSLVEMTLVQGAGDVGVEATPTTIATPALSKAVSAIVSFVGTAIVSIAKC	LANTHIPEPTIDE	66	training set
MALLDLQALEAAEQTSGGDSSLSLLCGKHSSHSVLLCL	LANTHIPEPTIDE	38	training set
MKKDAIIESIKEVSLEELDQIIGAGNGVFKTISHECHLNTWAFLATCCS	LANTHIPEPTIDE	49	training set
MEKIIGQSFEELSKKEMEAMQGSGDVQVETTPVCAISATVAASSAACAGVGAGIGTGITIVLTFKRC	LANTHIPEPTIDE	67	training set
MFEQRKNNWRNFIMNNEDFNLDLVTISKENNSGASPRVTSISLCTPGCKTGILMTCAIKTATCGCHFG	LANTHIPEPTIDE	68	discard
MENNLFDLDLKVEKSSNGVEPRVTSYAFCTPGTCACKEGPTFDSACCSVELTVYYCTR	LANTHIPEPTIDE	58	training set
MTLLDLQTMETPQDDEFTGGGSQASLLLCGDSSLSLVTCN	LANTHIPEPTIDE	40	training set
MNLFELQSLETPKEEAMGDVETGSRASLLLCGDSSLSVTTCN	LANTHIPEPTIDE	42	training set
MQMKNENIIGKSFVELDQAEMDFISGAEGTVEPQATPTISSVACIRVSVGVSAAGASFVTSFVASATSNCD	LANTHIPEPTIDE	71	training set
MSNNQFDLDVQVSKNVGKIEPQVTSVFACTPGCITGPNCGSSECGTVPCGKTTSRLC	LANTHIPEPTIDE	57	training set
MTVLDLQTLPSPETDALPGGGSTQSWVCASSWSINC	LANTHIPEPTIDE	36	training set
MSVQSEEAVAMSPAAAEGQEQTAEDWDLDVSIVESGPEADRLIQMTDDGCGETCESACSTTCP	LANTHIPEPTIDE	63	training set
MSKGYKFTKEELVEAWKDPQVREKLKDLPKHPSGKALNELSEEELAEIQGASDVQPETTPLCVGVIIGLTTSIKICKN	LANTHIPEPTIDE	78	training set
MTAAVLNHPTASAALPVDGLADDDFELDIKVVISESPLTVFMCPTSDGCGNTCENGASACQSSIEDAA	LANTHIPEPTIDE	68	training set
MTLLDLQTMETPKPEATDELCHGSRASLLLCGDSSLSVTTCN	LANTHIPEPTIDE	42	training set
MEKVLDLDVQVKANNNSNDSAGDERITSHSLCTPGCAKTGSFNSFCC	LANTHIPEPTIDE	47	training set
MAQQNPATTLKAATDYSTNTGSDFDLNIETLASAPVIGSLLNDTSDNCTSTCQSACTNSTCIGG	LANTHIPEPTIDE	64	training set
MINEKNLFDLDVQVTTASGDVDPQITSISACTPGCGNFR	LANTHIPEPTIDE	39	training set
MTNTIKDFDLDLKTNKKDTATPYVGSRYLCTPGSCWKLVCFTTTVK	LANTHIPEPTIDE	46	training set
MKCVKEKKELFDLDVKVNAREISNSKSDPPNTSLIWCTDGCAKR	LANTHIPEPTIDE	44	training set
MMFNKELKEVVPSFDSLTTEEMEALIGEGDIQAETTPVCAAAAASSGTCASFITGAASGVAFSIKEC	LANTHIPEPTIDE	67	training set
MTKGYKFTKEELVEAWKDPQVREKLKDLPKHPSGKALNELSEEELAEIQGASDVQPETTPLCVGVIIGLTTSIKICK	LANTHIPEPTIDE	77	training set
MEKNNEVINSIQEVSLEELDQIIGAGKNGVFKTISHECHLNTWAFLATCCS	LANTHIPEPTIDE	51	test set
MNISEKTVGLSMKKLSKTEMEKIYGASGVDPRTTPSPLLASFVASYIASAEFKCGKDNKGK	LANTHIPEPTIDE	61	training set
MKNVNSKINNVEYGYILKYSREDEKAMTNVEMVQAWKNPKLRTSGIAAHPAGEALVEVSADELARVHGGLAVQPDSTPTIVITITIVTTVICFPTPVY	LANTHIPEPTIDE	98	training set
MKNTIKDFDLDLKTTKNNSAEPLVGSRYLCTPGSCWKLVCFTTTIK	LANTHIPEPTIDE	46	training set
MKKDIELMNTIQEVSLEELDQIIGAGKNGVFKTISHECHMNSWQFLFTCCS	LANTHIPEPTIDE	51	training set
MALLDLQALDTPAEEAFDEVATGSQISLLVCEYSSLSVVLCTP	LANTHIPEPTIDE	43	training set
MSKKEHILRAWRDPEYFNSLSSEERAALPANPAAELELSDEVLESISGADSCEQFGSYYCTPCPPYVCM	LANTHIPEPTIDE	69	training set
MNLLDLQSLEIPKEEAAGDVATGSRASLLLCGDSSLSVVTCN	LANTHIPEPTIDE	42	training set
MELVLDLQAMEAPEVLETGGGGSHGGASNLSLLASCANSTVSLLTCH	LANTHIPEPTIDE	47	discard
MALLDLQAMETPAEEAFGELATGSQVSLLVCEFSSLSVVLCTP	LANTHIPEPTIDE	43	training set
MRYLITKKGAINLNTKFTKNPIIKNKLAINEINPAGNLFEEINEQDMSLIAGGTNDAISRAIANAVGLGNNYGMACTWSAECNGTTPC	LANTHIPEPTIDE	88	training set
MALLDLQTIESDERMTGGGNSTVSLLSCISAASVLLCL	LANTHIPEPTIDE	38	training set
MKKDIELMSTIQEVSLEELDQIIGAGKNGVFKTISHECHMNSWQFLFTCCS	LANTHIPEPTIDE	51	training set
MALLDLQTIETEERTDGGGASTVSLLSCISAASVLLCL	LANTHIPEPTIDE	38	training set
MALLDLQGMVSENGGGGGNSSLSLLCHSSHSITICL	LANTHIPEPTIDE	36	training set
MSILSLQALETPEETTEYMSVLSSLSAVNCTNSTVSTLLCL	LANTHIPEPTIDE	41	discard
MKKTKILKTPELKVTKDLNLIDPCGDVLEEIKEHEVSGAFNTWNTTTTSLGGILVSEVLGNKGKVCTGTKECQGTC	LANTHIPEPTIDE	76	training set
MALLDLQTMESDEHTGGGGASTASLLSCISAASVLLCL	LANTHIPEPTIDE	38	training set
MIKLDDFDLKIKKDDNKTGKVTPQVNSRYACTPGSCWKWVCFTTTAK	LANTHIPEPTIDE	47	training set
MSSSKKVVEAWKNPVERSKNEDAPNHPAGEVDSKEIQSLFGAGEGDVTPEGLSSWLGNNGGYCTLTKECMPSCN	LANTHIPEPTIDE	74	training set
MSDWKKPIYESLSTEGNPAGDILRELSDSEMDQTMAGGTARSYCACYSGENSCGRGCTITTECPFLTFICC	LANTHIPEPTIDE	71	training set
MAAEVLNLQLVSVQVDETDEVDGMRFSTFSTXRCGNWSAFSWENC	LANTHIPEPTIDE	45	training set
MNRNEVIEELAVNHPAGAKLVEVSKEELTRIYAGGDVQPETTPVCAIGGGLALGFSISKIYC	LANTHIPEPTIDE	62	training set
MALLDLQAMETPAEENFGELATGSQVSLLVCEYSSLSVVLCTP	LANTHIPEPTIDE	43	training set
MAILDLQTMELPETEAAPIDDTLASTSSLSVLNCGTSTVSTLICL	LANTHIPEPTIDE	45	training set
MSQKKDHILRAWRDPEYFNSLSSEERAALPANPAAELELGDDLLEVITGGDFCLPGQSSAQCTPCPPRHCL	LANTHIPEPTIDE	71	training set
MKQFNLEALGAIEDISDDELMVITGAVSVIDVEASGGVFCTVSHECHYNSVSPSSWLTCC	LANTHIPEPTIDE	60	training set
MKKEYELMNTIQEISLEELDQIIGAGKNGVFKTISHECHMNSFQFFFTCCS	LANTHIPEPTIDE	51	discard
MELVLDLQALEAPEVLDGGHGGGGHGGGSNLSLLASCANSTISLLTCH	LANTHIPEPTIDE	48	training set
MESEATATALENPDLFDLDIALLEVADPAGLVNMTDDGCGSTCEKDACISAA	LANTHIPEPTIDE	52	discard
MVKKFKFTKEELVAAWKDPQVREKSKDLPNHPSGKVLNELSEEELAEVQGASDVQVATTPMCVRLTVLPATSIKLCK	LANTHIPEPTIDE	77	training set
MKDVLVEITDAELDEILGAGDGVMHTLTHECHMNTWQFLLTCC	LANTHIPEPTIDE	43	training set
MALLDLQTMEADETTGTGGPSSLSVLSCVSAASISLCL	LANTHIPEPTIDE	38	training set
MTLLDLQSMETPKEEATGDVATGSRASLLLCGDSSLSVTTCN	LANTHIPEPTIDE	42	training set
MTLLDLQSLETVKDEVHGEVAGTSTASLTLCGDSSLSLTTC	LANTHIPEPTIDE	41	test set
MALLDLQTMEPEERTGGGDDSSASLLLCDKHSSHSTLLCL	LANTHIPEPTIDE	40	training set
MENSKVMKDIEVANLLEEVQEDELNEVLGAKKKSGVIPTVSHDCHMNSFQFVFTCCS	LANTHIPEPTIDE	57	training set
MALLDLQGLETPGYGGGHHHGGSTLTVLGCGSHRPSNLSLVLCH	LANTHIPEPTIDE	44	training set
MTPRVTDQGMRTASASAAQDPFDLDISVIESGGTVGACIASDGGCGSTCGGNACISSGS	LANTHIPEPTIDE	59	test set
MSKFDDFDLDVVKVSKQDSKITPQWKSESLCTPGCVTGALQTCFLQTLTCNCKISK	LANTHIPEPTIDE	56	training set
MNRNQVIEELAVNHPAGAKLVEVSREELTRVYGGGDVQAETTPMTPTLYLNGITIGLALSKQSC	LANTHIPEPTIDE	64	test set
MALLDLQNMETENNHGGGAASSLSLLSCISSVSFLICL	LANTHIPEPTIDE	38	training set
MENNDIELLARLHALPETDPVGVDGAPFAATCECVGQLTLLNTVCIGISCA	LANTHIPEPTIDE	51	training set
MSNQEIIQAWKNPKKRNQVMTSHPSGTGFHELNEQEMMFIAGGNGEVETQATPLLTTLTPATPAISWGGAVSAVSGLVSYTKDCI	LANTHIPEPTIDE	85	training set
MSLLDLQTMEPETATTGGGGGDQSSLSLLACDKHSSNSFLLCL	LANTHIPEPTIDE	43	training set
MAQTITTGTRVTAGTVDDEFDLDVRTVETADAASLQILTDDGCGSTCGACTTGVH	LANTHIPEPTIDE	55	training set
MELVLDLQALETPEVLEGGGGGSHGGASNLSLLASCANSTVSLLTCH	LANTHIPEPTIDE	47	discard
MNASTAVLDSTILDELDKELEAQIIKELEPEMFGLSRLLGNNGRWCTITKECMPSCN	LANTHIPEPTIDE	57	training set
MSQQDIIRAWKDADFRASLSQEQRSQLPKNPAGIDEIADEYLETIVGGRGCGGGTGCGTGGNCTCCGGNCTGKL	LANTHIPEPTIDE	74	test set
MTLLDLQTMETPKAEATDELCHGSRASLLLCGDSSLSVTTCN	LANTHIPEPTIDE	42	training set
MSHREMAAIYRDANKRANLEFSNPVGEVNEEELKNLAGAADVTPHTTPSSLPCGTLVTAVWCPSNACTSDC	LANTHIPEPTIDE	71	training set
MVLLDLQGLQAPSANGAASGGSGLTVLTCHSHKPSNLSVALCH	LANTHIPEPTIDE	43	training set
MKNISEKSVGLSMKKLDTTEMEKIYGASGVDTRTHPTVVVVSRASSKFCVTVAASALLSYNMNKC	LANTHIPEPTIDE	65	discard
MKSTNNQSISEIAAVNSLQEVSMEELDQIIGAGNGVVLTLTHECNLATWTKKLKCC	LANTHIPEPTIDE	56	training set
MRDLSEIKDPVLREKVSTLMKNPSGSVAVELTEQDMETLAGAGWYEELSASLGNKGRFCTLTKECQPCCN	LANTHIPEPTIDE	70	training set
MNNINPEIYVQTATDQEIALLVGGAGSGLVKTLTKDCPGFLSNICVNIGFISGCKNC	LANTHIPEPTIDE	57	training set
MSKKTISELVGKSYEELSVEEMYLLQGANGEDIPQPYATPVIISLTVASAGLSGAVSKAVSTLITVAASCV	LANTHIPEPTIDE	71	training set
MALLDLQTLEAPGGHSGGGGGGSNLSLLGCTPHENSSLSIICG	LANTHIPEPTIDE	43	training set
MELVLDLQALETPEVLEGGGGGGSHGGASNLSLLASCANSTVSLLTCH	LANTHIPEPTIDE	48	test set
MSDWKKPIYESLSTEGNPAGDILRELSDSEMDQAMAGGTARSYCGCYSGEHSCGRGCTITTECPFLTFICC	LANTHIPEPTIDE	71	training set
MKREDVLSAFNQVHPSGEALVELSHSELSRVYGGADVQPETTPICAVAATVAASSATCAAVGGGIAVGVTIVLTIKSC	LANTHIPEPTIDE	78	training set
MFNKELKEVVPSFDSLTTEEMEALIGEGDIQAETTPACAAAAASSGACAAGAGGFIVGATAIFSVKQC	LANTHIPEPTIDE	68	training set
MTKEEMIQAWKNPKLRVAGEGIEHPAGDALVELSADELSRVHGGLGVQPDSTPTITVTVIGVTVLVCFPGHAG	LANTHIPEPTIDE	73	training set
MSLLDLQTMETPKDEAIGDLETGGGSRASLLLCGDSSLSLTTCN	LANTHIPEPTIDE	44	training set
MTLLDLQSMETPKEEITEAAMTGGGSRASLLLCGDSSLSITTCN	LANTHIPEPTIDE	44	discard
MNNIKPEIYVQTATDQEITLLIGGAGSGFVKTLTKDCPGFLSNVCVNIGFISGCKNC	LANTHIPEPTIDE	57	training set
MEKVLDLDVQVKANNNSNDSAGDERITSHSLCTPGCSKTGSFNSFCC	LANTHIPEPTIDE	47	training set
MSPVLMADRTESADFVLDDAELELDMRVVESTTRIAIMMCDTSDGCGNSCSTSACSTSSNDPV	LANTHIPEPTIDE	63	training set
MTLLDLQSMETPKEETTEAAHGGGGGSRASLLLCGDSSLSITTCN	LANTHIPEPTIDE	45	training set
MALLDLQTMESEEHTDGGGGSSASLLLCWSTASVTLCL	LANTHIPEPTIDE	38	training set
MTKKEYGLQRMSQLDQRDFLKEIEEHEKQNQVSGGWGWKDLSKSLGNKGYVCTLTKECQKLCR	LANTHIPEPTIDE	63	training set
MEILELQGLELPQDENHDNASTLSVLNCGNSTVSTLICL	LANTHIPEPTIDE	39	training set
MKDNYELMNTIQEVSLEELDQIIGAGKNGAIKTISHECHMNSWQFLFTCCS	LANTHIPEPTIDE	51	training set
MSNSDIIRAWKDEDYSSSLSEEQRSQLPDNPIGIVELSDEDMEIVAGGAVNINSFGACNLNSQAAIVCLSASGFGATC	LANTHIPEPTIDE	78	training set
MALLDLQAMDTPAEDSFGELATGSQVSLLVCEFSSLSVVLCTP	LANTHIPEPTIDE	43	training set
MSKNEKLNKLRDQEFDTKELIGSVDENDLKQVAGAGDVNPETTPATPTIVAVSLGICPTTKCTSKC	LANTHIPEPTIDE	66	test set
MSREEKINALKNPESRNHEMENPVGKTMSELSSEELAGIQGASDVNAETTPLCIAASIGATIIFSMRNC	LANTHIPEPTIDE	69	training set
MNKELFDLDINKKMEAPTEMTVQTWGTVVKVSKAICKTGTCIGTISCTNCK	LANTHIPEPTIDE	51	training set
MTQFDDFDLDVAQTTNGVKPEPRITSKSLCTPGCVTGVLMGCALKTITCNCSVGIGKK	LANTHIPEPTIDE	58	training set
MYQGDLSLIEEIEEQDFDGVAYGACTTNTFSLSDSLGNHGGWCTLTKECQPNCS	LANTHIPEPTIDE	54	training set
MQWKNQMENLNAATYNPVGSVLSELTDTEMDTVAGGAQALGFTDGNCLTTITADCTPWLWGC	LANTHIPEPTIDE	62	training set
MTDFILDLQGMSSEDVEVGEQLASSYTTVLCGHSWTSITC	LANTHIPEPTIDE	40	training set
MDKELFDLDINKKMETPTEMTAQTWTSILKVSRAPCKSGTCLCTTSCSNCK	LANTHIPEPTIDE	51	test set
MTATMLSPIMTATTGASAATAVPEVPADPFDVDLTIVTEIGADLLPKACGTGDGCAASCASSCASAV	LANTHIPEPTIDE	67	training set
MALLDLQTIESEERTDGGGASTVSLLSCISAASVMLCL	LANTHIPEPTIDE	38	training set
MAPQIATKPQTGTPFTTDSGSDFDLDIETVASAPVVQALLNDTGDGCTSTCQSACSNSTCG	LANTHIPEPTIDE	61	training set
MTLLDLQSMDTVKEETTEAAHLTGGGSRASLLLCGDSSLSITTCN	LANTHIPEPTIDE	45	training set
MTLLDLQSMETPKEETTEAAMTGSRASLLLCGDSSLSVTTCN	LANTHIPEPTIDE	42	training set
MKNELRNPISRGEFMHPAGNVMEELGEAELQNFAAGGGIPWTSGGAICTLTHECAGTHWYSCC	LANTHIPEPTIDE	63	training set
MKNIEWIEEIDEQSFDNEVFGACTTNTFSLSDAYGNTGGWCTLSQECMSWCP	LANTHIPEPTIDE	52	training set
MNSTVTAWKDATYREGLAVDPGHPAGVVDLTADLADEGTSVAAVTLSTQPFFQCCG	LANTHIPEPTIDE	56	training set
MSKEYKFTKEELVEAWKDPQVREKLKDLPKHPSGKALNELSEEELAGIQGASDVQPETTPLCVGVIIGITASIKICK	LANTHIPEPTIDE	77	training set
MPDVLLPDNTRLADDPADDDFTLDVRIVVATGPMAGYADCPTDDGCGNTCANGASACDSYIGDPA	LANTHIPEPTIDE	65	training set
MSLLDLQTLEPAKDEAAGGGGGSEASLLLCGDSSLSLTTCH	LANTHIPEPTIDE	41	training set
MALLDLQTLEIPAEENLGELETGSSQSLLVCGPHSSQSLLLCN	LANTHIPEPTIDE	43	training set
MEKVLDLDVQVKGNNNTNDSAGDERVTSHFLCSYGCGNTGSFNSFCC	LANTHIPEPTIDE	47	training set
MALLDLQAMDTPKDEALGDLATGSQVSLLICEFSSLSVALCTP	LANTHIPEPTIDE	43	test set
MGIHAPTTGQNDANLFDLDLEIGVEKSVAGPAITSVSWCTPGCTSEGGGSGCSHCC	LANTHIPEPTIDE	56	test set
MSKKMENWKKAIYFKNEDVDNPAGDIFRELSDSELDGIMAGGTANTHCHCYSGKDSCGHGCTITTECPFATLICC	LANTHIPEPTIDE	75	training set
MALLDLQTMEADETTGGGGNSSLSLLSCVSAASITLCL	LANTHIPEPTIDE	38	training set
MSREYKFTKEELVEAWKDPQVREKLKDLPKHPSGKALNELSEEELAEIQGASDVQPETTPLCVGVIIGITASIKICK	LANTHIPEPTIDE	77	training set
MKSTNNQSIAEIAAVNSLQEVSMEELDQIIGAGNGVVLTLTHECNLATWTKKLKCC	LANTHIPEPTIDE	56	training set
MSLLDLQTMETPKPEGTEELHTGSRASLLLCGDSSLSVTTCN	LANTHIPEPTIDE	42	training set
MAEEVLNLQLVSVQVDETDEVDGMRFSTFSTXRCGNWSAFSWENC	LANTHIPEPTIDE	45	training set
MSNTQLLEVLGTETFDVQENLFTFDTTDTIVAESNDDPDTRFKSWSFCTPGCAKTGSFNSYCC	LANTHIPEPTIDE	63	training set
MANLDDFELDVQIKTSAGKIEPKITSKSLCTPGCITGVLMCFTKGCEISHSCIKC	LANTHIPEPTIDE	55	training set
MSTKDFNLDLVSVSKKDSGASPRITSISLCTPGCKTGALMGCNMKTATCNCSIHVSK	LANTHIPEPTIDE	57	training set
MSFILDLQSLDTPAAESAELGASYLSALLCFTGIAEADES	LANTHIPEPTIDE	40	training set
MSTMPATAPETGIDDLFDLDISVIESGPVIPELLRSTSDNCGGTCASACTSCKS	LANTHIPEPTIDE	54	training set
MVLLDLQGLQAPTASGGASGGSGLTVLTCQSHKPSNLSVALCH	LANTHIPEPTIDE	43	training set
MNRNQIIEELAENHPAGAKLVEVSKDELSRTYGGGDVQPETSPACAVGGAVAGGLWVAHTVSYWNC	LANTHIPEPTIDE	66	training set
MSLLDLQDLEPEHTTTGFDSNYSVFACHSIMSSVFCS	LANTHIPEPTIDE	37	training set
MDEKQLDSLVGQKFEDLSKEEMNFIAGGNDNARISPTIILSAATVASAASSFVGSYTLSAFTKCR	LANTHIPEPTIDE	65	training set
MAEEVLNLQLVSVQVDETDEVDEMRFSTFSTNHCGNWSAFSWENC	LANTHIPEPTIDE	45	training set
MALLDLQTLEPEERTGGGDDSSASLLLCDKQSSHSALLCL	LANTHIPEPTIDE	40	training set
METEKYLQVVEDEELEQLVGGAGPGWVETLTKDCPWKQPAACVIIMGQKICKKCY	LANTHIPEPTIDE	55	training set
MSLRKIVRAWEDPKYRDSLSDPELADLPDNPAGVIELTDAELGQVLGGAQSGNSVGCNTKTCVSTRGNSQNPCRNC	LANTHIPEPTIDE	76	training set
MNKKMNTAGPSFEELTVEEMEMIQGSGDVQAETTPVCAIAATAAASSAACGYVGGGIFTGVTVVVSLKSC	LANTHIPEPTIDE	70	training set
MENNLFDLDLKVEKSSNGVEPRVTSYAFCTPGTCACEDGPTFDSACCSVELTIYNCK	LANTHIPEPTIDE	57	training set
MPKYDDFDLDIQVKEVSNAAEPNITSVSLCTPGTCYQGCSGDTTFNSNCCPSNYTVCITKTCFTCA	LANTHIPEPTIDE	66	training set
MSVQQIEDAAIAPHPQGAGEEGSFEDWDLDVSIVESGPSADRLIRMTDDGCGVTCESACSTTCP	LANTHIPEPTIDE	64	training set
MKNNNIPLEISSLVGNSFEEMSLEEMALTQGTGDVQPQSTPGCIVGSLLYSSGWCGAGAATGTLVTLSIKRC	LANTHIPEPTIDE	72	training set
MKNTIKDFDLNLKSTKNEDASPSVGSRYLCTPGSCWKWVCFTTTVK	LANTHIPEPTIDE	46	training set
MRSNLERNPYLRNEAQQSVDLPLDNPIRELKEDELLKLNGAKSRFKPGAEVAVSTWGCYVGSVALGNDGFMCTTTVECQNQCK	LANTHIPEPTIDE	83	training set
MSNREKAELYRNASKRTELGFVNPVGEVSEDELRNLAGAADVTPHTTPSSLPCGVFVTAAFCPSTKCTSSC	LANTHIPEPTIDE	71	test set
MSLLDLQTLQTPEPEGNDDLHTGSRASLLLCGDSSLSVTTCK	LANTHIPEPTIDE	42	training set
MSTVLDLQGLEAPAEEAAALGSTISNNCG	LANTHIPEPTIDE	29	training set
MASILELQSLEVERASSAADSNGSVWECCSQGSWVPFTCGC	LANTHIPEPTIDE	41	training set
MALLDLQTMETEYGGHGGGGGSEASLLLCWSEASIVLCV	LANTHIPEPTIDE	39	training set
MALLDLQTMESDEHNDGGGASTVSLLSCVSAASVLLCL	LANTHIPEPTIDE	38	training set
MENQDLELLARLHALPETDPVGVDGAPFAATCECVGLLTLLNTVCIGVSCA	LANTHIPEPTIDE	51	training set
TTASSDVDPQITSVSLCTPGCGDTGSWNSFCC	LANTHIPEPTIDE	32	training set
MALLDLQTLESEEHTHTGASTASLLSCVSAASVLLCL	LANTHIPEPTIDE	37	training set
MSILSLQALETPDETTEYLSVLSSLSVVNCTNSTVSTLLCL	LANTHIPEPTIDE	41	discard
MPTLLAEPETPTMTVEDDDFALDLRVIESFEPIAQLRCDTSDGCGNTCQTSACSSFTNNPV	LANTHIPEPTIDE	61	training set
MRNPLAEEKVTGPINGVVEEIKGQDLDEKAGAGISTAIRMTVAGRCGRMVTVSYECTSPHVSCG	LANTHIPEPTIDE	64	training set
MNAKSNEEINYEAVATLQEVKIEDLDILLGGAGHGVNTISAECRWNSLQAIFTCC	LANTHIPEPTIDE	55	training set
MSNTQLLEVLGTETFDVQEDLFAFDTTDTTIVASNDDPDTRFKSWSLCTPGCARTGSFNSYCC	LANTHIPEPTIDE	63	training set
MEKETTIIESIQEVSLEELDQIIGAGKNGVFKTISHECHLNTWVFLATCCS	LANTHIPEPTIDE	51	training set
MKKNLMNSAEESSGNVLEELNNAQLGMISGGKKTKKNSSGDICTLTSECDHLATWVCC	LANTHIPEPTIDE	58	training set
MPIQLDDPVLTMPPQARRDQEEDFTTWDLDVSIVESGPAADRLIRMTDDGCGTTCQSACSTTCP	LANTHIPEPTIDE	64	training set
MKNEVNKLQKEEQVTWFEEIVDQEFDDDVFGACSTNTFSLSDYWGNNGGWCTISHECMSWCK	LANTHIPEPTIDE	62	training set
MKNSKIRNEFLKTSKTVGVVTEEELKMLTGGAGDVNPETTILTTSSWTCITAGVTVSASLCPTTKCTSQC	LANTHIPEPTIDE	70	discard
MPKDHEGDIELTTEINEQEFDDPTVGGSGEVGAATISSWLGNDGKICTATVECMPTCN	LANTHIPEPTIDE	58	training set
MALLDLQTMESDEHTGGGGASTVSLLSCISAASVLLCL	LANTHIPEPTIDE	38	training set
MGKLDNFDLDVKIKKDEKRGVKPSVTSYSACTPGCATSLFRTCLTRSCKGC	LANTHIPEPTIDE	51	training set
MSEIDSKKIVGDTFEDMSIWEMTMVQGSGDMEPNSLTVASAVLMSAAATGSFSIAVTKTVKGKC	LANTHIPEPTIDE	64	training set
MAQQNTRTLPQTATPFTAEPGSDFDLNIETVSALPVVGSLLNDTGDGCGQTCQSACSNSTCIG	LANTHIPEPTIDE	63	training set
MRKFDRTNMKYNNPAGNLLTELEAADLTSNKVDSLGSSGVVCTISVECGSIFTLACC	LANTHIPEPTIDE	57	training set
MKNQFDLDLQVAKNEVASKGVQPASGIICTPSCATGTLNCQVSLTFCKTC	LANTHIPEPTIDE	50	training set
MAKFDDFDLDIVVKKQDNTVQPNVTSKSLCTPGCITGVLMCLTQNSCVSCNSCIKC	LANTHIPEPTIDE	56	training set
MENLNAATHNPVGSVLSELTDTEMDTVAGGAQALGFTDGNCLATITADCTDWLPICG	LANTHIPEPTIDE	57	training set
MSPVLAVDRPESTDSAIDDAEFELDMRVVESTTRLVIMMCDTSDGCGSSCSTSACSTASNDPS	LANTHIPEPTIDE	63	training set
MELVLDLQAMEAPTHGCGGHGGGSHLSVSGCGGASGLSLLLCEV	LANTHIPEPTIDE	44	training set
MTKQQIIDAWKNPEIRDGIEKVTPHPSGKAFNELTMDELAEVQGASDVAPETTPACVAAFATGMLFSIKYC	LANTHIPEPTIDE	71	training set
MSVQSEEAVTTVPAAAESLEGSVDGWDLDVSIVESGPEADRLIQMTDDGCGQTCQSACSTTCP	LANTHIPEPTIDE	63	training set
MKNSKELISEVIEEVSEKELKEIAGGKKGSGWVRTITDDCPNSIIVCC	LANTHIPEPTIDE	48	training set
MTDKNQNIFELDVQVLKGQSSVEPQVTSVALCTPGCNPTATLCTSCAFNCTYKAPCK	LANTHIPEPTIDE	57	training set
MINEKNLFDLDVQVTTATGDVDPQITRISACTPGCGNTGSFNSFCC	LANTHIPEPTIDE	46	training set
MDLVLDLQAMETPDLAEGVMAGNSHGGGGGSNLSLLASCANSTISLLTCH	LANTHIPEPTIDE	50	training set
MTRNTVVPSHTQVRPQPPEATDGFDLDVSLVEVADPAGLVNLTDDNCGSTCGACTTNVA	LANTHIPEPTIDE	59	training set
MSTKDFNLDLVEVSKSNTGASARITSYSLCTPGCITGVLMGCHIQSIGCNVHVHVSK	LANTHIPEPTIDE	57	training set
MYDKALVTAWKNPMARKGLGAIHHPSGDVLAELKEEDLQDFTGGFDTNTLTTSTSILISMTLGNNGWVCTATKECMPSCN	LANTHIPEPTIDE	80	training set
MEKVLDLDVQVKGNNNTNDSAGDERLTSYSLCSFGCEKTGSFNSFCC	LANTHIPEPTIDE	47	training set
MALLDLQSMESDEMTGGGHGGGGSLASLLLCWSDASIVLCL	LANTHIPEPTIDE	41	training set
MSAQQTSPMPKTGTSYAAEATSDFDLNIEVLAGAPVVPGLLNDTGDGCTATCQSACSNSTCG	LANTHIPEPTIDE	62	training set
MTLLDLQTMETPKTEVSGELTGGGGSRASLLLCGDSSLSITTCN	LANTHIPEPTIDE	44	training set
MTLLDLQSMETPKEETSEVAMTGGGSRASLLLCGDSSLSITTCN	LANTHIPEPTIDE	44	discard
MSPVLMADQTESVDFALDDAELELDMRVVESTTRIAIMMCDTSDGCGNSCSTSACNTSSNDPS	LANTHIPEPTIDE	63	training set
MRNLKEDVVGLSMKKLNTLEMEKIYGASGVDTRTHSMAIVATTTTRTVGQTGPVTISKVLSLNTICL	LANTHIPEPTIDE	67	training set
MAPQNTGIALKAATDFGAVGDSDFDLRIETVASAPVLGSLLNDASDNCGSTCQSACSNSTCIGG	LANTHIPEPTIDE	64	training set
MKKNLMKSAEESSGNVLEELNNAQLGMISGGKKIKKSSSGDICTLTSECDHLATWVCC	LANTHIPEPTIDE	58	training set
MKAVKEKKELFDLDVKVNAREISNSESDPPNTSLIWCTPGCAKNL	LANTHIPEPTIDE	45	training set
MKQVELEALQAINDLTDEELEEIVGAGSGVIKTISHECHMNSWQAIFTCCS	LANTHIPEPTIDE	51	training set
MKDNYELMNTIQEVSLEELDQIIGAGKNGVFKTISHECHMNSWQFLFTCCS	LANTHIPEPTIDE	51	training set
MSKGYKFTKEELVEAWKDPQVREKLKDLPKHPSGKALNELSEEELAGIQGASDVQPETTPLCVGVIIGLTTSIKICK	LANTHIPEPTIDE	77	training set
MDKHSEVTLENEILFQEFDEDVFGACTTNTFSLSDYWGNKGNWCTLTHECMNWCK	LANTHIPEPTIDE	55	training set
MSKNEKLNKLRNQDLDTKELIGLIDENELKKIAGAGDVNPEIAPTPHTVTTIKFTTVCPITHSLV	LANTHIPEPTIDE	65	training set
MRTEIVLSHEAPELDLELDLRVSDLPEQAESFGQGTFTSPSSYAIGTRCPICC	LANTHIPEPTIDE	53	training set
MVGLIDENELKKIAGAGDVNPEIAPTSHTVTTIKFTTVCPITHSLV	LANTHIPEPTIDE	46	training set
MTLLDLQSMETPKEETTEAALTGGGGGGSRASLLLCGDSSLSITTCN	LANTHIPEPTIDE	47	training set
MTAMLTEHPPTETEDPFALDVRVVVAAHPGGKLMCSTGDGCGTTCATGASACNSSTEEPS	LANTHIPEPTIDE	60	training set
MGNIAPAQTHNEANLFDLDLEVGVEKSVAGPAITSISYCTPGCTSEGGGSGCSHCC	LANTHIPEPTIDE	56	training set
MAENLFDLDVQVNKSQGSVEPKIRSIWNCSSGCGGGNTSQTCVETCSPCFSNLGTLC	LANTHIPEPTIDE	57	training set
MTTAVLDHPTAPTALPADGLADDDFELDIKVVISESPLTVFMCPTSDGCGNTCENGASACQSSIEDAA	LANTHIPEPTIDE	68	training set
MSKNEKLAKLRNQEFDTKELIGSIDENELKKVAGAGDVNPETTPATPTIVEATIAATVSICPTQNVQAVVNNN	LANTHIPEPTIDE	73	training set
MTLLDLQSMETPKEETTEAAQGGGGGSRASLLLCGDSSLSITTCN	LANTHIPEPTIDE	45	training set
MALLDLQGLESPADLSATRGGSSGSGHSCPSNLSATLCGGTSGLSVLICH	LANTHIPEPTIDE	50	test set
MVKKFKFTKEELVEAWKDPQVREKLKDLPKHPSGKALNELSEEELAEIQGASDVQPETTPLCVGVIIGLTTSIKICK	LANTHIPEPTIDE	77	training set
MSVQSEKAVATVPAAAEGQEGAVDGWDLDVSIVESGPEADRLIQMTDDGCGQTCESACQSTCP	LANTHIPEPTIDE	63	training set
MANDAFDLDVQVNKSKGSIEPQAWNSIAACSAAACQGERTSNCHTNKLCVTNFETWCC	LANTHIPEPTIDE	58	training set
MENRDLELLAHLHALPETDPVGVDGAPFAATCECVGLLTLLNTVCVGVSCA	LANTHIPEPTIDE	51	training set
MKLNENALSSLEEVTENELDTILGARKSGVINTVSHECNMNSWQFVFTCCA	LANTHIPEPTIDE	51	training set
MNLVRAWKDPEYRATLSEAPANPAGLVELADDQLDGVAGGTTWACATITLTVTVCSPTGTLCGSCSMGTRGCC	LANTHIPEPTIDE	73	training set
MKNNKNLFDLEIKKETSQNTDELEPQTAGPAIRASVKQCQKTLKATRLFTVSCKGKNGCK	LANTHIPEPTIDE	60	training set
MINEKTLFDLDVQVTTASGDVDPQITSISACTPGCGNTGSFNSFCC	LANTHIPEPTIDE	46	training set
MTTAVLEAPAAPPAEGLTDDDFQLDVRVVVSESPAYNFNCPTSDGCGDTCANGASACISSIEDAA	LANTHIPEPTIDE	65	test set
MNNFDGDISLIEEIAEQDFDGVAYGACSTNTFSLSDFLGNQGGWCTLTKECQPNCS	LANTHIPEPTIDE	56	training set
MENLSVVPSFEELSVEEMEAIQGSGDVQAETTPVCAVAATAAASSAACGWVGGGIFTGVTVVVSLKHC	LANTHIPEPTIDE	68	training set
MALLDLQMLEAPEDGGGEDSILSLGCDSTLSLLLC	LANTHIPEPTIDE	35	training set
MNEFKKIGLENELFNLIEDTEQLELMSGAGWTGVAKSITSCSLLSIGLGNDGWVCTWTAECQATCR	LANTHIPEPTIDE	66	training set
MRTEIVLSQDAPELDLDLDLRVSDLPEQTESFGQGTYTSPSSYAIGTRCPVCC	LANTHIPEPTIDE	53	training set
MEKNNSYAGPSFEELTVKEMETIQGSGDVQAETTPVCFTIGLGVGALVSAAGC	LANTHIPEPTIDE	53	training set
MKNTIKDFDLDLKTTKNNSDEPLVGSRYLCTPGSCWKLVCFTTTVK	LANTHIPEPTIDE	46	training set
MTFILDLQGLETPAAEESAENAYSASYLSLLLCFTGAVEADA	LANTHIPEPTIDE	42	training set
MNKELFDLDINKKMETPTEMTAQTWTTVVKVSKAVCKTGTCICTTSCSNCK	LANTHIPEPTIDE	51	training set
MKVGIKMDNEKYLQVVEDEELEQLVGGIGPGWVETLTKDCPWNMPVACVTIMGQRICKKCR	LANTHIPEPTIDE	61	training set
MKKLDTTEMEKIYGASGVDPRTTPSPLLASFVASYIASAQFRCGKDNKGK	LANTHIPEPTIDE	50	test set
MSNFEITRAWKDPEYRASLSAEQRRLLPENPAGLIELSDEDMSSLAGGCTTCTGGTGFTHTCNWSCGLEAEDSLTIS	LANTHIPEPTIDE	77	training set
MDEKQLDSLVGQKFEDLSKEEMNFIAGGNDNARISPKIILSAATVASAASSFVGSYTLSAFTKCR	LANTHIPEPTIDE	65	training set
MNNYDGDISLIEEIAEQDFDGVAYGACSTNTFSLSDFLGNQGGWCTLTKECQPNCN	LANTHIPEPTIDE	56	training set
MVLLDLQGMETPGGGHHGGGSTLTVLTCQSGRPSNLSIALCH	LANTHIPEPTIDE	42	training set
MALLDLQAMDTPQEEAVGDLATGSQISLLICEYSSLSVTLCTP	LANTHIPEPTIDE	43	training set
MSNTSIDVDSIVGDDFSDLSPEDMALLTGRGNDVAPQSLSIAVSVDVTVSVAMSVASYFHVGGTCKKH	LANTHIPEPTIDE	68	training set
MSALTATPTPAGLVPTSRDRAPASTSDDLFDLDLRVQVPVIDESLWSMTNDGCGQTCESACTPSCTQNG	LANTHIPEPTIDE	69	training set
MSHEETINAWNNAENDPESETTKPQPANPAGMTELSDEELRQIQGGLLDCSIIPTMTSVTSLVPCVVNSSDDQQ	LANTHIPEPTIDE	74	training set
MKNQFDLDLQVAKNEVAPKGVQPASGIICTPSCATGTLNCQVSLTFCKTC	LANTHIPEPTIDE	50	training set
MSELSMEKVVGETFEDLSIAEMTMVQGSGDINGEFTTSPACVYSVMVVSKASSAKCAAGASAVSGAILSAIRC	LANTHIPEPTIDE	73	training set
MTNEQVISAWKNPDIRSIMGIFSDNPAGISFNELSTNEMEEVHGKIDPKLESYSLSCFISERFPSWCP	LANTHIPEPTIDE	68	training set
MFGPRPRPGSFESVHPNTQGRSMRTEIVLSQDAPELDLDLDLRVSDLPEQAESFGQGTYTSPSSYAIGTRCPVCC	LANTHIPEPTIDE	75	training set
MAILDLQALETPEETTEYRSVLSSLSVVNCTNSTVSTLLCL	LANTHIPEPTIDE	41	discard
MEAEKIVGMQFEDLSKEEMNFIAGGNNNARISPTIVTPVIPYTSYVASAAGSAALSAVSGLVSYTKKCF	LANTHIPEPTIDE	69	training set
MTALSLVPPVDTAAIGAVNLDAEFDLDLRVSTDPLPGISDGCATDDGCDPTCASSCVSNA	LANTHIPEPTIDE	60	training set
MSLLDLQALEAQSATKGGHGGGHGGGGEGGSEVSLLLCDSTASVLLCL	LANTHIPEPTIDE	48	training set
MSTKDFNLDLVSVSKKDSGASPRITSISLCTPGCKTGALMGCNMKTATCHCSIHVSK	LANTHIPEPTIDE	57	training set
MKVDQMFDLDLRKSYEASELSPQASIIKTTIKVSKAVCKTLTCICTGSCSNCK	LANTHIPEPTIDE	53	training set
MADYEFDFAEGDATDGIDTQWKSKSLCTPGCITGILQTCAIQSFTCEVHVSR	LANTHIPEPTIDE	52	test set
MKNTIKDFDLDLKTTKNNFAQPLVGSRYLFTPGSCWKLVCFTTTVK	LANTHIPEPTIDE	46	training set
MKNDFVIGKSLKELSLEEMQLVYGGTDGADPKSTIICSATLSFIASYLGSAQTRCGKDNKKK	LANTHIPEPTIDE	62	training set
METEKYLQVVEDEELEQLVGGAGPGWVETLTKDCPWKQPVACVIIMGQKICKKCY	LANTHIPEPTIDE	55	training set
MNRNQIIEELAVNHPAGAKLVEVSKEELTRVYGGGDVQPETSPACASAMLYLQGVTVSLGLSRMHC	LANTHIPEPTIDE	66	training set
MTNFNSNEKFCGKSLKSLSADEMSLIYGASDGAEPRWTPTPIILKSAAASSKVCISAAVSGIGGLVSYNNDCLG	LANTHIPEPTIDE	74	training set
MANPNVGILEEITDQNLDAVSAAGQGWGTVMSSLSCYGASYVLGNNGNFCTATAECQNNCK	LANTHIPEPTIDE	61	training set
MENLKSLDAVGTSLKELSEEEMNEIFGGSTDVDVRSSLVCSALLTFVGSYLASAGLKCGKDNKK	LANTHIPEPTIDE	64	training set
MELVLDLQALEAPEVLEGGGGGSHGGASNLSLLASCANSTVSLLTCH	LANTHIPEPTIDE	47	discard
MSNNQFDLDVQVSKNVGKIEPQVTSWFACTGGCLTGSNCGSSECGTVPCGKTTSKYC	LANTHIPEPTIDE	57	training set
MSKNEKLNKLRDQEFDTKELIGSVDENDLKQVAGAGDVNPETTPATPTIVAVSVKLCPTGVCTKSC	LANTHIPEPTIDE	66	test set
MAILDLQTLELPETEAAPIDDTLASTSSLSVLNCGTSTVSTLICL	LANTHIPEPTIDE	45	training set
MSSKKVVESWKNPVLRSKNEDAPSHPAGEVDSKEIKELFGAGEGDVTPEGLSSWLGNKGGYCTLTKECMPSCN	LANTHIPEPTIDE	73	training set
MKNDFVIGKSLKELSLEEMQLVYGGTDGADPRSTIICSATLSFIASYLGSAQTRCGKDNKKK	LANTHIPEPTIDE	62	training set
MMGSTTSGGTALAERPVEDDFALDVRIVVAAHPVGKLMCNTGDGCGNTCAGTASACNSYVGDPF	LANTHIPEPTIDE	64	training set
MTELNMKEVVGETFEDLTIAEMTLVQGSGDVTPESTTVCAAFASFAGSIQLVKTLKSKC	LANTHIPEPTIDE	59	training set
MALLDLQTLESDEQSSTGGVSTLSLLSCVSAASITLCL	LANTHIPEPTIDE	38	training set
MKKEAYEGIGLVDESELKKMAGAGEVTPRTTVPCGAAVITAGGVIGGGIKYTLQDSANSCPTGQCTSKC	LANTHIPEPTIDE	69	training set
MSKTTEHTVGLSMKKLNKSEMENIYGASGVTPRTTPATTLLASFVASYIASAEFRCGKDNK	LANTHIPEPTIDE	61	training set
MEKETTIIESIQEVSLEELDQIIGAGKNGVFKTISHECHLNTWAFLATCCS	LANTHIPEPTIDE	51	training set
MKKILSLQKLSTKGTTTGGGGGGGGGSHASLLLCGDSSLSLTSCN	LANTHIPEPTIDE	45	training set
MAENLFDLDVQVNKSQGSVEPKIWSIWNCSIGCGGGNTSKTCVETCSPCFSNLGTLC	LANTHIPEPTIDE	57	training set
MGKLDDFDLDVKVKADTTKVGPAITSKSLCTPGCITGVLMCITQNSCVSCKSCIKC	LANTHIPEPTIDE	56	test set
MAPQNPTTTLKAATDYSTNTGSDFDLNIETLASAPVIGSLLNDTSDNCTSTCQSACTNSTCIGG	LANTHIPEPTIDE	64	training set
MDEFDLNLNLVDAGPAASGHATTTSDECGSGNTDSDACSGGSGN	LANTHIPEPTIDE	44	training set
MTQFDDFDLDVAQTTNEVKPEPRITSKSLCTPGCVTGVLMGCALKTITCNCSVGIGKK	LANTHIPEPTIDE	58	training set
MKAEISKLQKEVQYEQVTWFEEVVDQEFDDDVFGACTTNTFSLSDHWGNKGGWCTVSKECMAWC	LANTHIPEPTIDE	64	training set
MAKFDDFDLDIVVKKQDTTVQPNVTSKSLCTPGCITGILMCLTQNSCVSCNSCIKC	LANTHIPEPTIDE	56	training set
MNKVLSLQTMESTKDIELRAGSSVSVNCKVISTISFFLC	LANTHIPEPTIDE	39	training set
MGINGPAQTQDDGMFDLDLEIGVEKSVAGPAVTSISYCTPGCTSDGGGSGCSHCC	LANTHIPEPTIDE	55	training set
MALLDLQGLETPGYGHGGHHHGGSTLTVLGCGSQRPSNLSLLLCH	LANTHIPEPTIDE	45	training set
MSNLKENVVGLSMKKLNKTEMEKIYGASGVDTRTHPTVVVASRITVQASKASSKSCLGAIGGIGGLVSYNKNCLG	LANTHIPEPTIDE	75	training set
MFFSKEMVSAWKNPVARRNLGDVPHPSGDVMAELKDEDLQNFAGGWDTNTLTTSTSIFISRGLGNDGWVCTWSKECMPSCN	LANTHIPEPTIDE	81	training set
MSGPQPRPWTFESVHPTIQGRSMRTEIVLSHEAPELDLDLDLRVSDLPEQAESFGQGTYTSPSSYAIGTRCPICC	LANTHIPEPTIDE	75	training set
MKEKVKAWKDPLARDVHTSHPSGDIFSEISDEEMYKLSGGSAETQDITLPIDLCWLSRLGGNQGWFCTITKECQVNCNVG	LANTHIPEPTIDE	80	training set
MALLDLQALESDEHNGGGGASTVSLLSCVSAASILLCL	LANTHIPEPTIDE	38	training set
MALLDLQAMETPAEESFGELATGSQVSLLVCEYSSLSVVLCTP	LANTHIPEPTIDE	43	training set
MLNKENQENYYSNKLELVGPSFEELSVEEMEAIQGSGDVQAETTPACFTIGLGVGALFSAKFC	LANTHIPEPTIDE	63	training set
MSNPNAGILEEIGEQGLARIAFGADAHPNTISNGCTIVISAVIGNEGRVCTLTVECQDGC	LANTHIPEPTIDE	60	training set
MSILDLQTMELPTDDAAPIDDTLASVNSTLSVLNCTNSTVSTIACL	LANTHIPEPTIDE	46	training set
MSKKMENWKKAIYFKNEDVDNPAGDIFRELSDSELDGMMAGGTANTHCHCYSGKDSCGHGCTITTECPFATLICC	LANTHIPEPTIDE	75	training set
MALLDLQTMETQNELSTDGGGGGGGGDISSVSLLLCDKHSSNSVLICL	LANTHIPEPTIDE	48	training set
MEFVLELQELDAPELDLRGGGGGGSQASLLLCGDSSVSLVTCQD	LANTHIPEPTIDE	44	training set
MATKDFNLDLVEVSKSNNGASTRITSHSFCSQACKTYKILGCNLLTHGCRFPR	LANTHIPEPTIDE	53	training set
METVGESTTEFDLDVTFAAKGTVIAELMNSTSDNCGSTNESACAGCITD	LANTHIPEPTIDE	49	training set
MVRQANSYNNVSWIEEIQDQNFNDDVFGACSTNTFTLSDYLGNNGGWCTISVECMAWCN	LANTHIPEPTIDE	59	training set
MALAEQPAPSFGAVEDDFSLDVRVVVAAHPVGKLMCNTGDGCGNTCQGSASACNSYVSDPV	LANTHIPEPTIDE	61	training set
MTREEIIRAWKSPEQRAAVALAAHPSGAAMSELDEIALQEVIGRGDVQAESTPLCAFGVGFLVGAGIGVLVSVAKC	LANTHIPEPTIDE	76	test set
MSEKQIERTIRAWKDPEFRKTLSDVADHPSGSIEARQLSMLGSEENVNPMTTPVSPAPTVVIRVSLKVCPTFKIKCKV	LANTHIPEPTIDE	78	training set
MHKNILRNPLKRNAEFENPAGNIMIELSEAELNKVHGAANSPNTYNSCYSKQKSCGNFCTFTTECPFLSFCC	LANTHIPEPTIDE	72	training set
MRINKEMCCEAVNVLQEIQIDELDILLGGGKGHGVNTISAECRWNSLQAIFTCC	LANTHIPEPTIDE	54	training set
MVLLDLQAMELPGGGYPGGGGHGGGGSTLTLLGCASQTPSNLSLLLCH	LANTHIPEPTIDE	48	training set
MKNTTNEMLELIQEVSLDELDQVIGGMGKGAVGTISHECRYNSWAFLATCCS	LANTHIPEPTIDE	52	training set
MIAMKNSKDILNNAIEEVSEKELMEVAGGKRGTGWFATITDDCPNSVFVCC	LANTHIPEPTIDE	51	training set
MTLLDLQSMETPKEETAEVAMTGGGSRASLLLCGDSSLSVTTCN	LANTHIPEPTIDE	44	discard
MMTPDMIIRAWKDPSFRESLTAEQRAQLPANPSGATLNELSETELMDVVGGRIDIGFTATNSCEYICTNLTFSLC	LANTHIPEPTIDE	75	training set
MSYHKQMSKVLELQGMAKTAAQGGLTSNLSFICKEKSTISVFTCLPGQQ	LANTHIPEPTIDE	49	training set
MEEKMCLGALNALQEFQIEELDNLLGGRGHGVNTISAECRWNSLQAIFTCC	LANTHIPEPTIDE	51	training set
MKTMKNSAAREAFKGANHPAGMVSEEELKALVGGNDVNPETTPATTSSWTCITAGVTVSASLCPTTKCTSRC	LANTHIPEPTIDE	72	training set
MPTLGIENTVDAFALDVRVITDVSPEDAAAPCGTDDGCAPTCASSCNSGV	LANTHIPEPTIDE	50	training set
MGINGPAQTQDDGLFDLDLEIGVEKSVAGPAVTSISYCTPGCTSDGGGSGCSHCC	LANTHIPEPTIDE	55	training set
MALLDLQTMESDEHTGGGGNSTVSLLSCISAASVLLCL	LANTHIPEPTIDE	38	training set
MKKNVKAIEEVSEQELKELAGGAEERAIWTVXIPISLAACPTTQCASIVSPCND	LANTHIPEPTIDE	54	training set
MALLDLQTMESDEHTSGANSTVSLLSCVSAASVLLCL	LANTHIPEPTIDE	37	training set
MVRQANSYNNVSWIEEIQDQNFNDDVFGACSTNTFTLSDYLGNKGGWCTISVECMAWCN	LANTHIPEPTIDE	59	training set
MSKNEKLAKLRNQEFDTKELIGSIDENELKKVAGAGDVNPETTPATPTIVEATIAATVSICPTTKCTSRC	LANTHIPEPTIDE	70	test set
MENRDLELLAHLHALPETDPVGVDGAPFAATCECVGLLTLLNTVCVGISCA	LANTHIPEPTIDE	51	training set
MALLDLQNMEPENGHGGGGAPASSLSLIGCISSVSFLVCL	LANTHIPEPTIDE	40	training set
MALLDLQAMETPAEDSFGELATGSQVSLLVCEYSSLSVVLCTP	LANTHIPEPTIDE	43	training set
MFTNNKEVVPSFEDLSLEEMYALQDDTGVEAEISPTTTSSAFCIGAGVGLFASAVKC	LANTHIPEPTIDE	57	training set
MALLDLQALEITEDEAFGDVETGSNLSLTSCGHNSHLSLLAC	LANTHIPEPTIDE	42	training set
MKNSQIRNEFLRTSNAVGVVSEEELRMLTGGAGDVNPETTPLTTSSWPCVIGAVDISANLCPTTKCTSKC	LANTHIPEPTIDE	70	training set
MVKKNNSYNNVSWIEEIQDQNFNDDVFGACSTNTFTLSDYLGNNGGWCTISVECMAWCI	LANTHIPEPTIDE	59	training set
MSQKEHILRAWRDPEYFNSLTAEERAALPANPAAELELGDDLLESISGGRSAPEQCSALCTPCPPYHCV	LANTHIPEPTIDE	69	training set
MTAIDTEKPVAEDQQTVGAVDEADPFGLDISFIEGTPATETVLTCTTGDTCGSSCPSACVTS	LANTHIPEPTIDE	62	training set
MVLLDLQGLEAPAASDVASGGSTLTVLSCHSGKPSNLSVALCH	LANTHIPEPTIDE	43	training set
MKNNNKICEDALESLQELKLEEVDELLGGAGHGVNTISAECRWNSLQAIFSCC	LANTHIPEPTIDE	53	training set
MALLDLQGLEMAPADRTSGDSRASLLLCGDSGLSVTTCN	LANTHIPEPTIDE	39	training set
MNMRQRFCKLPNRDSKNLERERPKLPKFDDFDLNVKQASEKDVVKPEVGSRYLCTPGSCWKWVCFTTTA	LANTHIPEPTIDE	69	training set
MAEEVLNLQLVSVQVDETDEVDEMRFSTFSTNRCGNWSAFSWENC	LANTHIPEPTIDE	45	training set
MNLLDLQSMETPKEEAMGDVETGSRASLLLCGDSSLSVTTCN	LANTHIPEPTIDE	42	training set
MTLFDLQSLETAKDEAHGEATATSTASLLLCGDSSLSVTTC	LANTHIPEPTIDE	41	training set
MEKIVGKAFEELTEEEMKKMQGSGDVQPETTPICGFTIGIGIGALASVKWC	LANTHIPEPTIDE	51	training set
MSDENLIKAWKDLDYRKHLSAPVNHPSGKSADELSEEEMIHLFGAEENKKIPRSTMVCGGIVSFVVTYLATELVCKN	LANTHIPEPTIDE	77	test set
MTLLDLQSLETVNEARGEIAHGSEASLLLCGDSSLSVTTCN	LANTHIPEPTIDE	41	training set
MSIQLDDPVLAVPPQAGRDQEEDFTTWDLDVSIVESGPAADRLIRMTDDGCGTTCETACSTTCP	LANTHIPEPTIDE	64	training set
MKNDFVIGKSLKELSLEEMQLVYGGTDGADPRSTIICSATLSFIASYLGSAQTRCGKDNKKNKIFNFKNKSCSLFSSLVTNNFERGFF	LANTHIPEPTIDE	88	training set
MTLLDLQSMETPKEETTEVAMTGGGSRASLLLCGDSSLSITTCN	LANTHIPEPTIDE	44	discard
MSILSLQALETSEETFEFRSVLSSLSAVNCTNSTVSTLLCL	LANTHIPEPTIDE	41	discard
MAEEVLNLQLVSVQVDETDEVDGMRFSTFSTFSTNRCGNWSAFSWENC	LANTHIPEPTIDE	48	training set
MAEEVLNLQLVSVQVDETDEVDGMRFGTFSTNRCGNWSAFSWENC	LANTHIPEPTIDE	45	training set
MALLDLQTMESDENHGGGGGASTASLLSCVSAVSVLLCL	LANTHIPEPTIDE	39	training set
MSTLTVSDTPDGMVPVSRDRHPAGDLFDLDLRVHVPQQGEPLWSMTNDGCGKTCETACTPSCTDNG	LANTHIPEPTIDE	66	training set
MKNSKDILNNAIEEVSEKELMEVAGGKRGTGWFATITDDCPNSVFVCC	LANTHIPEPTIDE	48	training set
MDVVKVSKQDSKITPQWKSESLCTPGCVTGVCKLASFKQ	LANTHIPEPTIDE	39	training set
MKSSFLEKDIEEQVTWFEEVSEQEFDDDIFGACSTNTFSLSDYWGNKGNWCTATHECMSWCK	LANTHIPEPTIDE	62	training set
MSTTIAGTTAASDFDLDVTIVEGADPVAALLRSTDDGCGSTCSGTACTSFGGNV	LANTHIPEPTIDE	54	training set
MALLDLQNMESEELNGGGASTVSLLSCVSAGSVILCV	LANTHIPEPTIDE	37	training set
MALLDLQAMDAPEHGGGGGGSHVSLTLCASQASVLLCL	LANTHIPEPTIDE	38	test set
MEALEALQEIKVEELDTFIGGGGRASNTISSDCRWNSLQAIFSCC	LANTHIPEPTIDE	45	training set
MSDWKKPIYESLSTEGNPAGDILRELSDSEMDQAMAGGTARSYCACYSGEHSCGRGCTITTECPFLTFICC	LANTHIPEPTIDE	71	training set
MKNNNKICQDALESLQELKLEEVNELLGGAGHGVNTISAECRWNSLQAIFSCC	LANTHIPEPTIDE	53	training set
MSTKDFNLDLVSVSKTDAGASPRVTSVFMCTPGCVTGALMGCNLQTATCNCHVHISK	LANTHIPEPTIDE	57	training set
MSTTPATAPETGTDDLFDLDISVIESGPVIPELLRSTSDNCGGTCASACTSCKS	LANTHIPEPTIDE	54	training set
MGKLDDFDLDVKVKATPKGGVKPSITSRILCTSSCYTQFIQCHDRV	LANTHIPEPTIDE	46	training set
MNLFDLQSLETPKDEAIGDVETGSRASLLLCGDSSLSITTCN	LANTHIPEPTIDE	42	training set
MNSLLAVSNDPFELDVQIVTEGPVAAALLTDTDDGCDTVKGSDC	LANTHIPEPTIDE	44	training set
MALLDLQTLESETDAHDGASTVSLLSCVSAASILLCL	LANTHIPEPTIDE	37	training set
MAKQQMNLVEIEAMNSLQELTLEELDNVLGAGGGVIQTISHECRMNSWQFLFTCCS	LANTHIPEPTIDE	56	training set
MSKSQLLKVAQQDYLEKVDFQNEKLQEVQGGKCPWYNLSCHLGNDGKICTFSHECTGGCNA	LANTHIPEPTIDE	61	training set
MNNEDFNLDLVTISKENNSGASPRVTSISLCTPGCKTGILMTCAIKTATCGCHF	LANTHIPEPTIDE	54	training set
MNNVLELQKLELKDHAMAAHPISTSSLFSCTESTISFLNCG	LANTHIPEPTIDE	41	training set
MALLDLQSLESDQSETGQESSLSLLSCGNSSHSTLLCL	LANTHIPEPTIDE	38	training set
MRMTILDLQALETSAAEATLPGSTVSNQC	LANTHIPEPTIDE	29	training set
MSILNLQALETPDETVEYLSVLSSLSVVNCTNSTVSTLLCL	LANTHIPEPTIDE	41	discard
MNKELFDLDINKKMETPTEMTAQTVPTTILVSRSVCKTLTCICTISCSNCK	LANTHIPEPTIDE	51	training set
MSILSLQALETVEETVEFRSVLSSLSAVNCTNSTVSTLLCL	LANTHIPEPTIDE	41	discard
MTKENVKKEVAKKEKQSVENYVGEHFEDLSEDEMAKLQGQGSDTEGRNLGAVMDMILSKGNYKC	LANTHIPEPTIDE	64	training set
MNNVKNLFDLDVQVTTASSDVDPQITSVSLCTPGCGDTGXFDLDVQVTTASSDVDPQITSVSLCTPGCGDTGSWNSFCC	LANTHIPEPTIDE	79	training set
MAILDLQALETPEEPTEYRSVLSSLSVVNCTNSTVSTLLCL	LANTHIPEPTIDE	41	training set
MALLDLQTMESEERHDGGGASTVSLLSCVSAASVLLCL	LANTHIPEPTIDE	38	training set
MAPQTLTAPETENATVSGLGGSEFDLDPTIVESGDVFANLLRDTNDNCGSTCSGSACASGGGNVG	LANTHIPEPTIDE	65	training set
MALLDLQGLQAPTASGGASGGSGLTIVTCASHTPSNLSLALCH	LANTHIPEPTIDE	43	training set
MEILDLQALEAPEAPVEETAPSTLSVLSCTVSTASTILCL	LANTHIPEPTIDE	40	test set
MSKGYKFTKEELVEAWKDPQVREKLKDLPKHPSGKALSELSEEELAEIQGASDVQPETTPLCVGVIIGITASIKICK	LANTHIPEPTIDE	77	training set
MALLDLQVLESDDHTLTVASTVSLLSCVSAASVLLCL	LANTHIPEPTIDE	37	training set
MKKGLFDQIAKEDMENILVEIDEHQEMAGFNTWNTISTSTCIAVSHFVGNDGKVCTYTVECVNNCR	LANTHIPEPTIDE	66	training set
MKNQFDLDLQVAKNEVAPKEVQPASGLICTPSCATGTLNCQVSLSFCKTC	LANTHIPEPTIDE	50	training set
MSNELKAWKNPYYRNMQGNQTKLPIEDPMVELKEEELLQIQGGNEERWAETVLTTLTCAAASYFLGNPGHMCTITVECQNQCNN	LANTHIPEPTIDE	84	training set
MSVQQIEDAALAPHPQNAGEEESFEDWDLDVSIVESGPSADRLIRMTDDGCGVTCESACSTTCP	LANTHIPEPTIDE	64	training set
MALLDLQTIETEERTEGGGGASTVSLLSCISAASVMLCL	LANTHIPEPTIDE	39	training set
MEDLKNVVVTLSDEELQEASGAAGCGWTCTITDDCPNSVFVCC	LANTHIPEPTIDE	43	training set
MSEKQIERTIRAWKDPEFRKTLSDVADHPSGSIEANQFSTLGSEDNVNPMTTPVSPAPSVIIRVSLKVCPTFKIKCKV	LANTHIPEPTIDE	78	training set
MALLDLQGLEMAPADRTGGGSRASLLLCGDSSLSVTTCN	LANTHIPEPTIDE	39	training set
MAKFDDFDLDIIEKKVRRDIIPASITSQHSFCTPNCLTGFLCPPKTQLTCTCKLKGQ	LANTHIPEPTIDE	57	training set
MRTEIVLSHEAPELDLDLDLRVSDLPEQAESFGQGTFTSPSSYAIGTRCPICC	LANTHIPEPTIDE	53	training set
MQWKNQMENLNAATHNPVGSVLSELTDTEMDTVAGGAQALGFTDGNCLATITADCTPWIGICS	LANTHIPEPTIDE	63	training set
MALLDLQTMESEERTDGAGNSTVSLLSCISAASVLLCL	LANTHIPEPTIDE	38	training set
MFENKEKRSVVPSFEDLSLEEMNALQDDTGVEAEISPSTTSSAFCVGAGLGALTTLTIKKC	LANTHIPEPTIDE	61	training set
MTLLDLQSMDTPKEETTEAAHGGGSRASLLLCGDSSLSITTCN	LANTHIPEPTIDE	43	training set
MTKEYKFTKEELVEAWKDPQVREKLKDLPKHPSGKALNELSEEELAGIQGASDVQPETTPLCVGVIIGLTTSIKICK	LANTHIPEPTIDE	77	training set
MSEYDIVRYWKDEGYRAAVGGNILPANPAGIVELTDEALDSLVAGAGAEMVLGSCLFVSCFNQPKPDAEQA	LANTHIPEPTIDE	71	test set
MEFILDLQDMDTPEVQSNAMASGGSSGGGGSTTASSVSLLLPCSHSSASLLLC	LANTHIPEPTIDE	53	training set
MALLDLQILDSDEHNGGGGASTLSLLSCVSAASILLCL	LANTHIPEPTIDE	38	training set
MALLDLQTMESDEHTGGGGGQSTVSLLSCISAASVLLCL	LANTHIPEPTIDE	39	training set
MGKDFKNPILRRNNNENHPSGNLLEEIREQDMSEIAGGTTDAVSAAIARSVGLGNNFGKYCTWSAECAGTVSCGK	LANTHIPEPTIDE	75	training set
MEKNNIFDLDINKKMESTSEVSAQTWATIGKTIVQSVKKCRTFTCGCSLGSCSNCN	LANTHIPEPTIDE	56	test set
MNNTIKDFDLDLKTNKKDTATPYVGSRYLCTPGSCWKLVCFTTTVK	LANTHIPEPTIDE	46	training set
MAEININNLDIDIIRAWKDEDYRNSLSEEQRSQFPQNPAGMIELSDDDMGSVVGGGSYLCCGGAISEYFTNPVAAE	LANTHIPEPTIDE	76	training set
MTEEMTLLDLQGMEQTETDSWGGSGHGGGGDSGLSVTGCNGHSGISLLCDL	LANTHIPEPTIDE	51	training set
MVLLDLQTLEAPTGGGHGGGGGSTLTVLGCESYKPSNLSLLLCH	LANTHIPEPTIDE	44	training set
MALLDLQAMESEDRTEGGGASTLSLLSCVSAASLTLCL	LANTHIPEPTIDE	38	training set
MAILDLQTLELPETEAHPIDDTLASTSSLSVLNCGTSTVSTLVCL	LANTHIPEPTIDE	45	discard
MIKNPIKRQSEDVKLPCGDTKVEITENQGLDVTGGTFSEGTISITLSVYMGNDGKVCTWTVECQNNCSHKK	LANTHIPEPTIDE	71	training set
MKQSNEMLELIQKVSLDELDQVIGGMGKGAVGTISHECRYNSWAFLATCCS	LANTHIPEPTIDE	51	training set
MALLDLQALESEDITTAAASTASLLSCVSTTSVLLCV	LANTHIPEPTIDE	37	training set
MSTTPATAPETGIDDLFDLDISVIESGPVIPELLRSTSDNCGGTCASACTSCKS	LANTHIPEPTIDE	54	training set
MSESNMKKVVGETFEDLSIAEMTKVQGSGDVMPESTPICAGFATLMSSIGLVKTIKGKC	LANTHIPEPTIDE	59	training set
MALLDLQAMETPAEEAFGDVATGSQVSLLICEFSSLSVVLCTP	LANTHIPEPTIDE	43	training set
MPKYDDFDLNLKQNVSSSNKEPRITSIKWCTPGTCNNTCKGDSTLKSNCCGGSLMCSLGGC	LANTHIPEPTIDE	61	training set
MVLLDLQSLETPGGGHDGGGGSTLTVLGCESGRPSNLSLLLCH	LANTHIPEPTIDE	43	training set
MNTKFTKNPIIKNKLAINEINPAGNLFEEINEQDMSLIAGGTNDAISRAIANAVGLGNNYGMACTWSAECNGTTPC	LANTHIPEPTIDE	76	test set
MAPSTATLEPAIRTGAASDDFDDLDVSVVEVLDPAHLVSMTDDNCGSTCEKSTCISAV	LANTHIPEPTIDE	58	training set
MNPSYQGDVSLLEEIAEQDFDGVAYGACTTNTFSLSDALGNNGGWCTLTKECQPNCN	LANTHIPEPTIDE	57	test set
MESVYQGDIALIDEIAEQDFDGVAYGACTTNTFSLSDSLGNNGGWCTFTKECQPNCN	LANTHIPEPTIDE	57	training set
MTNFNSNEKFCGKSLKSLSADEMSLIYGASDGAEPRWTPTPIILKSAAASSKVCISAAVSGIGG	LANTHIPEPTIDE	64	training set
MTLLDLQTLETEESEDFGGGGGGESSVSLLLCDKHSSHSNLLCL	LANTHIPEPTIDE	44	training set
MALLDLQTLEAPGGGHGGGGGGGSNLSLLACVPHENSSLSLLCG	LANTHIPEPTIDE	44	training set
MNLFDLQSLETPKEEAMGDVETGSRASLLLCGDSSLSVTTCN	LANTHIPEPTIDE	42	training set
MALLDLQAMELPATERTGGGSQASLLLCGDSSLSVTTCN	LANTHIPEPTIDE	39	training set
MSKFDDFDLDVVKVSKQDSKITPQWKSESLCTPGCVTGVLQTCFLQTITCNCKISK	LANTHIPEPTIDE	56	training set
MAPQNTGIALKAATDFGAVGDSDFDLRIETVASAPVLGSLLNDTSDNCGSTCQSACSNSTCIGG	LANTHIPEPTIDE	64	training set
MALLDLQAMETPAEESFGELATGSQVSLLVCEFSSLSVVLCTP	LANTHIPEPTIDE	43	training set
MSTVTMEPVETVETVDLFDLDIRVGVGNIQGNAAINSWSYCTPGCTSSGGGSGCSHCC	LANTHIPEPTIDE	58	training set
MSRSPPEAVPKKSRPHGHQGKDSVMTLLDLQTMETPAEEITGELATGGGSRASLLLCGDSSLSVTTCN	LANTHIPEPTIDE	68	training set
MEMVLELQELDAPNELAYGDPSHGGGSNLSLLASCANSTVSLLTCH	LANTHIPEPTIDE	46	training set
MAQQKVTVLKAGTDYSDDDFDLDIETVTAAPVLGALLKDTDDGCGSTCQSACSNSTCIAG	LANTHIPEPTIDE	60	training set
MNHDLIRAWKDEDHREGLAAMAHPAGDIDLTSATGGDAQVTSWMCVTVGLSLLLRCFPGQPQV	LANTHIPEPTIDE	63	training set
LDVQVKANNNSNDSAGDERITSHSLCTPGCAKTGSFNSFCC	LANTHIPEPTIDE	41	training set
MENQTLELLAHLHALPETDPVDFDGASYSGTCACVGLLTLLNTVCVGISCA	LANTHIPEPTIDE	51	training set
MTRNTVVPSRTQVRPQPPEATDGFDLDVSLVEVADPAGLVNLTDDNCGSTCGACTTNVA	LANTHIPEPTIDE	59	training set
MSHENIIRAWKDADFRNRLSEKERALLPKNPVGLVELTDAELGFAAGGRYNNTGDGGCSQSPHCI	LANTHIPEPTIDE	65	training set
MENFKKYDELTEEEMRNLQGTEDVQAETTPVCAFTAASSIACADVITVTISFATCR	LANTHIPEPTIDE	56	training set
MSKTEEIVIMNEVCGKGLKSLDVNQMSNIYGASDVDPRWTPVASAVIRSISKSTKACVGGGVTAISGIVSYNKDCLG	LANTHIPEPTIDE	77	training set
MMKQLDKKSKTGIYVQVASDKELELLVGGAGAGFIKTLTKDCPEVVSQVCGSFFGWVSACKNC	LANTHIPEPTIDE	63	training set
MVQNEAIILGWKNPALRNTLPAAVAHPAGDALAGLSEEELLAVYGGGDVQAETTPICYTAATVTASSAACAGVGAGIVAGVTIVLTIKRC	LANTHIPEPTIDE	90	training set
MSLLDLQTLEPAKDEAAGGGGGSEASLLLCGDSSLSLTTCN	LANTHIPEPTIDE	41	training set
MALLDLQSLDTPQSDGGDQSSLSLLACDKHSSNSFLLCL	LANTHIPEPTIDE	39	training set
MKKDVVIESIKEVSLEELDQIIGAGNGVFKTISHECHLNTWAFLATCCS	LANTHIPEPTIDE	49	training set
MALLDLQEMEIPGGGHGGGGGSSLSLLGCTPHENSSLSILCGN	LANTHIPEPTIDE	43	training set
MEKVLDLDVQVKANNNSNDSAGDERITSHSLCTPGCTKTGSFNSFCC	LANTHIPEPTIDE	47	training set
MTLLDLQSMETPKEEVTEGALYTGGGGSRASLLLCGDSSLSITTCN	LANTHIPEPTIDE	46	training set
MVLLDLQAMELPGGGGGHGGGGGGGGGSTLTLLGCASQTPSNLSLLLCH	LANTHIPEPTIDE	49	training set
MSILNLQSLRAPEASSEFRSVLSSLSVVTCTTSTVSTLLCI	LANTHIPEPTIDE	41	training set
MTLLDLQSMETPKEEVTEGALHGGSGGSRASLLLCGDSSLSITTCN	LANTHIPEPTIDE	46	training set
MAAEVLNLQLVSVQVDETDEVDGMRFSTFSTNRCGNWSAFSWENC	LANTHIPEPTIDE	45	training set
MEKKEWEKTAQIVQEGFLQEVEEQEIGEESGGAWWNVSKNLGNKGRICTLTKECQSMCN	LANTHIPEPTIDE	59	training set
MSRNQVMEELKMNHPAGAPMVEVSEDELIRVYGGGDVQPETAPVVTGLTIITLYVPSKLNC	LANTHIPEPTIDE	61	training set
MDLISVSKKDSGVSPRITSISLCTPGCKTGALMGCNMKTATCNCSIHVSK	LANTHIPEPTIDE	50	training set
MEELKGVVMTVTDEELQEAAGAAGCGWLCTVTDDCPNSVFVCC	LANTHIPEPTIDE	43	discard
MSFMKNSKDILTNAIEEVSEKELMEVAGGKKGSGWFATITDDCPNSVFVCC	LANTHIPEPTIDE	51	training set
MELVLDLQALDTPEVLDGGHGGSHGGTSNLSLLASCADSTISLLTCH	LANTHIPEPTIDE	47	training set
MALLDLQTLEADEHTGGGGASTLSLLSCVSAASILLCL	LANTHIPEPTIDE	38	training set
MAEEVLNLQLVSVQVDETDEVDGMRFSPFSTNRCGNWSAFSWENC	LANTHIPEPTIDE	45	training set
MNDILETETPVMVSPRWDMLLDAGEDTSPSVQTQIDAEFRRVVSPYMSSSGWLCTLTIECGTIICACR	LANTHIPEPTIDE	68	training set
MMGSTNGGTALAERPVEDDFALDVRVVVAAHPVGKLQCNTGDGCGNTCAGTASACNSYVGDPF	LANTHIPEPTIDE	63	training set
MENHDIELLARLHALPETDPVGVDGAPFAATCECVGLLTLLNTVCIGISCA	LANTHIPEPTIDE	51	training set
MNNVLALQKLSSDTGEEAVGDNSADGGQEPAASNISLVDCEMGSGLSLLLC	LANTHIPEPTIDE	51	training set
MENVLDLDVQVKAKNDTSDSAGDERITSFIGCTPGCGKTGSFNSFCC	LANTHIPEPTIDE	47	training set
METEKYLQVVEDEEIEQLVGGVGPGWIETLTKDCPGYKPYACITIAGQTICKRCR	LANTHIPEPTIDE	55	training set
MSEINTKAIVGDTFEDMTLVEMTLVQGSGDVNPETTPATPTIVIVSEGLLTAAGSAALSILSVRTIKGHC	LANTHIPEPTIDE	70	training set
MKKLDTTEMEKIYGASGVDPRTTPSPLLASFVASYIASAEFRCGKDNKGK	LANTHIPEPTIDE	50	discard
MSVLDLQGMEAAPQTGGHGGGSSNSGHSCPSNLSLTLCDGSSGLSLLICH	LANTHIPEPTIDE	50	training set
MENQDLELLARLHALPETDPVGVDGAAFAGTCECVGLLTLLNTVCIGVSCA	LANTHIPEPTIDE	51	training set
MNKIIRAWKDAKYRASLSQEERAQIPANPAGEVELSDAELGAVSGGRPSSDLSSMLRTCTSGSESCCC	LANTHIPEPTIDE	68	training set
MSEINTNKIVGDSFEELTIAEMTQVQGTGDVEVRSTPICTFTAGVTVSIVIVKTLKGRC	LANTHIPEPTIDE	59	training set
MSQQDIIRAWKDAEFRESLSQEQRSQLPKNPAGIDEIPDESLETIVGGRGCGGGTGCGTGGNCTCCGGNCTGKL	LANTHIPEPTIDE	74	discard
MALLDLQTLEAPGGGHGGGGGGSNLSLLACVPHENSSLSLLCG	LANTHIPEPTIDE	43	training set
MERVLDLDVQVKGNNNTNDSMGDERVTSHFLCSFGCEKTGSFNSFCC	LANTHIPEPTIDE	47	training set
MTDKNQNIFELDVQVLKVQSSVEPRWTSDSLCTPGCTPTATLCTSCAFNCTYKDPCK	LANTHIPEPTIDE	57	training set
MVNSKDLRNPEFRKAQGLQFVDEVNEKELSSLAGSGDVHAQTTWPCATVGVSVALCPTTKCTSQC	LANTHIPEPTIDE	65	test set
MKNSKDILTNAIEEVSEKELMEVAGGKKGSGWFATITDDCPNLVFVCC	LANTHIPEPTIDE	48	training set
MSKGYKFTKEELVEAWKDPQVREKLKDLPNHPSGKALNELSEEELAEIQGASDVQPETTPLCVGVIIGLTTSIKICK	LANTHIPEPTIDE	77	training set
METEKYLQVVEDEELEQLVGGIGPGWVETLTKDCPGYKPYACITIAGQTICKKCR	LANTHIPEPTIDE	55	training set
MSDFDLDAKVVDNETGEPAPRITSWSLCTPGCVTAAGCTTSVCTQGCHVSK	LANTHIPEPTIDE	51	training set
MALLDLQTMESDEHTGGGNSTLSLLSCVSAASVTLCL	LANTHIPEPTIDE	37	discard
MSMNEKQIVGESFEDLSDKDMAMLTGRGDDEVAPASFTPTMGEFVTLTLISIQVCTRTLYKCK	LANTHIPEPTIDE	63	training set
MSVQSEEAVATVPAAAEVQEGSVEGWDLDVSIVESGPEADRLIQMTDDGCGETCESACSTTCP	LANTHIPEPTIDE	63	training set
MSKIEAWKNPVARMNSQIVSPAGDLMDELSDSEMEMLAGGCEWYNISCQLGNKGQWCTLTKECQRSCK	LANTHIPEPTIDE	68	test set
MALLDLQTMESDETAHTGGNSTLSLLSCVSAASVALCL	LANTHIPEPTIDE	38	test set
MKFRICFANRSCVKGFNYELVCAVCFENGKEVNGTMTAMMETTMLDLDVDIDAMPAAAATPQITSVSLCTAFCTSQGGGSFCSFCC	LANTHIPEPTIDE	86	training set
MSNLKENVVGLSMKKLNKSEMENIYGASGVDTRTHPTVIVVSRISSAKCASTISAISGLVSYNKDCLG	LANTHIPEPTIDE	68	training set
MNMKHRKETDMSLLDLQTMEPQEHTGGGGDDSSASLLLCDKFSSHSTLLCL	LANTHIPEPTIDE	51	training set
MLNEHIIRAWKDEDYLDSLSAEEKAQLPENPAGLIELTDEDMSSVSGGCTCGSTQCSMPWHHYSGVAEESSTLLA	LANTHIPEPTIDE	75	training set
MENVLDLQALEAPEALESQGLDHHCHGHSHFSLHCGDSTLSLLLCD	LANTHIPEPTIDE	46	training set
MSEINMKKIVGDTFEDMSIAEMTLVQGSGDVNGEVTTSPACVYVSVAASRASSQKCGQAAGAIASFVSTAVLSAVKC	LANTHIPEPTIDE	77	training set
MALLDLQTMESDDITGGGNSTLSLLSCVSAASVTLCL	LANTHIPEPTIDE	37	training set
MTLLDLQSMDTPKEETTEAAHGGGGGSRASLLLCGDSSLSITTCN	LANTHIPEPTIDE	45	training set
MTLLDLQSMETPKEEATEVAMTGGGSRASLLLCGDSSLSVTTCN	LANTHIPEPTIDE	44	discard
MALLDLQTMETEYGGHGGGGGSEASLLLCWSDASIVLCV	LANTHIPEPTIDE	39	training set
MFENIDVVRAWKDSDYRDSLTQDQRDRLPENPAGLIELSDEDMSSIAGGHPTVRPTTCSCCGSAALTA	LANTHIPEPTIDE	68	training set
MENLNVVPSFEELSVEEMEAIQGSGDVQAETTPVCAVAATAAASSAACGWVGGGIFTGVTVVVSLKHC	LANTHIPEPTIDE	68	training set
MGFILDMQELETPEAPSNAMASGHGGGGSKTASSASLLLPCSHSSASLVLC	LANTHIPEPTIDE	51	training set
MALLDLQTMESDETASTGGNSTLSLLSCVSAASVTLCL	LANTHIPEPTIDE	38	discard
MSMNEKQIVGESFDDLSDNEMALLTGRGNDDVAPASSLTVTIPISPYLITGGITATLSLAGKCHK	LANTHIPEPTIDE	65	training set
MSNFNDFNLGIKKVHSGSKKGLEPRITSYVLCTPGCITGRLMGCNNKTKTCHCHSSHNFSFHAR	LANTHIPEPTIDE	64	training set
MRDENKKTNEVSGEAFEDLTISEMAEVQGAGDMEGELTTPVCVVIATASASVGLAKTFKGKC	LANTHIPEPTIDE	62	training set
MPVNATEGTTTPGSDMDFDVDFDLDIDSSLVTVTTGPSVTSHSVCTPGCTSPGGGSFCSWCCC	LANTHIPEPTIDE	63	training set
MSTPIAATPATAPETGTDGLFDLDISVIESGPVIPELLRSTSDNCGGTCASACTSCKS	LANTHIPEPTIDE	58	training set
MEKVLDLDVQVKANNNSNDSSGDERITSHSLCTPGCAKTGSFNSFCC	LANTHIPEPTIDE	47	training set
MTILDLQGMETAHHGGRPRRSGASKYCGGTSQLSLLLC	LANTHIPEPTIDE	38	discard
MKNISEKSVGLSMKKLDTTEMEKIYGASGVDTRTHPTVIVVSRASSKACMSGVSAISGLLSYNKDCIG	LANTHIPEPTIDE	68	training set
MALLDLQTMEADELTGAPSSLSVLSCVSAASITLCL	LANTHIPEPTIDE	36	training set
MVLLDLQGMETPGGGGHNGGGSTLTVLTCQSGRPSNLSIALCH	LANTHIPEPTIDE	43	training set
MKELSLEEMQLVYGGTDGADPRSTIICSATLSFIASYLGSAQTRCGKDNKKK	LANTHIPEPTIDE	52	training set
MSKEELNSIVGRAFEEMDIQQMTSIQGSGTETAQSTPAISRVTLSIARKSSAKCISWISFSAGGLNSYKSKC	LANTHIPEPTIDE	72	training set
MSYNKQMSKVLGLQEMKKTTVQGGLTSNLSLVCKEKSTISVFTCLPGQQ	LANTHIPEPTIDE	49	training set
MTHEEIKLMNQSCGSGLKSLSMEEMQNIYGASDVDPRATPTIVASIIRSVAQSSKVCISAVGSAISGIVSNNKNCLG	LANTHIPEPTIDE	77	training set
MALLDLQTMESDEQSSTGGVSTLSLLSCVSAASITLCL	LANTHIPEPTIDE	38	training set
MALLDLQTMETEEHTGGGSVASLLLCASQASITLCL	LANTHIPEPTIDE	36	training set
MSIVLDLQGLETPAEETALATSTVSNNCQ	LANTHIPEPTIDE	29	training set
MKNLERERLKLPKFDDFDLNVKQASEKDVVKPEVGSRYLCTPGSCWKWVCFTTTA	LANTHIPEPTIDE	55	training set
MHTCLFSTKEADVGINSPADVRNDEGLLDLDLEIGVEKSVAGPAVTSISYCTPGCTSEGGGSGCSHCC	LANTHIPEPTIDE	68	training set
MEKVLDLDVQVKGNNNTNDSAGDERITSHFLCSFGCGKTGSFNSFCC	LANTHIPEPTIDE	47	training set
MPKFDDFDLNVKQASEKDVVKPEVGSRYLCTPGSCWKWVCFTTTA	LANTHIPEPTIDE	45	training set
MSKEMLIESWKNPFTRSALVTSPAGDVMAELEDADLNNVVGAGIHAMDSSGVVCTITTECSTWPGC	LANTHIPEPTIDE	66	test set
MEEIIMQNNDFNLDLVSTSKEKKQGASPRITSISLCTAGCITGRIMGCHKTPTVSCNCH	LANTHIPEPTIDE	59	test set
MALLDLQAMDAPEHGGGGGGSEASLLLCWSEASIVLCL	LANTHIPEPTIDE	38	training set
MTAALADVPVDVFDLDVQVETERVRPATMGCQTDDGCGTTCQISACHSQK	LANTHIPEPTIDE	50	training set
MTVLDLQTLPSPETDALPGGGSTQSWVCGSFVSTGCF	LANTHIPEPTIDE	37	training set
MLNFKESAVTGAAFEDMSVAEMSRIQGSGDISPETTPACALIISKAISGAAVSFAFSVGVVKTVKGNC	LANTHIPEPTIDE	68	training set
MENSKDILTNAIEEVSEKELMEVAGGKKGSGWFATITDDCPNSVFVCC	LANTHIPEPTIDE	48	training set
MALLDLQTMESDEHTGGGGASTVSLLSCVSAASVLLCL	LANTHIPEPTIDE	38	training set
MVDIMRKFDRTNMKYNNPAGDLLTELEAADLTSNKVDSLASSGVVCTISVECGSIFTLACC	LANTHIPEPTIDE	61	training set
MENLKSLDAVGTSLKELSEEEMNEIFGGSTDVDVRSSLVCSALLSFVGSYLASAGLKCGKDNKK	LANTHIPEPTIDE	64	training set
MSKGYKFTKEELVEAWKGPQVREKLKDLPKHPSGKALNELSEEELAEIQGASDVQPETTPLCVGVIIGLTTSIKICK	LANTHIPEPTIDE	77	training set
MTEKEIMLMNATCGEGMKSLDTEKMSEIYGASDVDPRWTPVISLVARSIVKSTKACIGAGASAISGIVSHNKDCLG	LANTHIPEPTIDE	76	training set
MSQEAIIRSWKDPFSRENSTQNPAGNPFSELKEAQMDKLVGAGDMEAACTFTLPGGGGVCTLTSECIC	LANTHIPEPTIDE	68	training set
MNKLNSNAVVSLNEVSDSELDTILGGNRWWQGVVPTVSYECRMNSWQHVFTCC	LANTHIPEPTIDE	53	training set
MSLLDLQTLEPAADEALTGGGGGSEASLLLCGDSSLSLTTCH	LANTHIPEPTIDE	42	training set
MALLDLQTMEPEERTGGGDDSSASLLLCDKLSSHSALLCL	LANTHIPEPTIDE	40	training set
MTLLDLQGMHIEDTDRNGGGGGGSQASLLLCGDSSLSVTTCN	LANTHIPEPTIDE	42	training set
MMKEMTNYAGPSFEELEQEEMELVQGSGDVQAETTPVCFTVGLGIGSLVSASVC	LANTHIPEPTIDE	54	discard
MQNNDFNLDLVSTSKEKKQGASPRITSISLCTAGCITGRIMGCHKTPTVSCNCH	LANTHIPEPTIDE	54	discard
MEEIVGKAFEELTEEEMKNMQGSGDVQPETTPLCGFTIGIGIGALVSVKWC	LANTHIPEPTIDE	51	training set
MANNVFDLDVEVKSVNSVHQNIGLFTSACFSSQCFSSKCFTDSCFSSDCFTGRHQCGYTHGGC	LANTHIPEPTIDE	63	training set
MSVLDLQGMEAAPQTGGHGGGSSNSGHSCPSNLSVTLCGGTSGLSLLICH	LANTHIPEPTIDE	50	training set
MALLDLQTIETEERTDGGGNSTVSLLSCISAASVLLCL	LANTHIPEPTIDE	38	training set
MADILDMQAEETESPAEEKGSRLSLRLCYNSYVSLALCFVK	LANTHIPEPTIDE	41	training set
MENHDIDLLARLHALPETDPVGVDGAPFAATCECVGLLTLLNTVCIGISCA	LANTHIPEPTIDE	51	training set
MKNTNIIDIEATNALQELSFEELDTIIGAKKKGNDGAIPTISHDCHMNSWQFIFTCCS	LANTHIPEPTIDE	58	training set
MTRHEARHAARHERTRDVALLDLQMLEAPEHGGGEDSTASVLECDSTLSLILC	LANTHIPEPTIDE	53	training set
MSAKASIKNKSGGFLMKKEFLALELMTEEELKELAGGSEATPMTVTPTTITIPISLAGCPTTKCASIVSPCND	LANTHIPEPTIDE	73	training set
MTATVLELQVEEPAGSDLFDLDVRTLEVADSAGLINMTDDGCTSTCGACVTNAP	LANTHIPEPTIDE	54	training set
MNKAAFLKNPVLRMKSSLSVENPAGNVLEEISAQDMMSQVGGTIITISLCATASKYLGNKGYVCTATKECQNSCQ	LANTHIPEPTIDE	75	test set
MKKEFLALELMTEEELKELAGGSEATPMTVTPTTITIPISLAGCPTTKCASIVSPCND	LANTHIPEPTIDE	58	training set
MTLLDLQSMETPKEEAIGDVETGSRASLLLCGDSSLSVTTCN	LANTHIPEPTIDE	42	training set
MKNSKDILTNVIEEVSEKELMEVAGGKKGSGWFATITDDCPNSVFVCC	LANTHIPEPTIDE	48	training set
MALLDLQAMDTPAEDSFGELATGSQVSVLVCEYSSLSVVLCTP	LANTHIPEPTIDE	43	training set
MQNKYDDQTLDNLAELSDTEIEELLGAGWGSIFSFTHECNTNTMTQLFTCCF	LANTHIPEPTIDE	52	discard
MSNTQLLEVLGTETFDVQEDLFAFDTTDTTIVASNDDPDTRFSSLSLCSLGCTGVKNPSFNSYCC	LANTHIPEPTIDE	65	training set
MNNVKNLFDLDVQVTTASSDVDPQITSVSLCTPGCGDTGSWNSFCC	LANTHIPEPTIDE	46	training set
MIAMKNSKDILNNAIEEVSEKELMEVAGGKKGSGWFATITDDCPNSVFVCC	LANTHIPEPTIDE	51	training set
MNDKIIQYWNDPAKRSTLSAAELSKMPVNPAGDILAELSDADLDKVVGAGDCGGTCTWTKDCSICPSWSCWSWSC	LANTHIPEPTIDE	75	training set
MENLNATTYNPVGSVLSELPATEMDTVAGGAQALGFTDGNCLATITADYTPWIGICS	LANTHIPEPTIDE	57	training set
MTLLDLQSMETPKEEVTEGALHGGGGGGSRASLLLCGDSSLSITTCN	LANTHIPEPTIDE	47	training set
MSILSLQALETTEETTEYMSVISSLSAVNCTNSTVSTLLCL	LANTHIPEPTIDE	41	discard
MNPMSDPNAGILEEISDQQLDEFSAGTFGGAEYVVSFVMGNLGNFCTATLECQKNCV	LANTHIPEPTIDE	57	training set
MENLNNVINNLSDEELADVAGGKKDGCGWVCTYTLDCPGTRWFNCC	LANTHIPEPTIDE	46	test set
MALLDLQGMVSENGGGGGNSSLSLLCHSSHSVTICL	LANTHIPEPTIDE	36	training set
MNEERIHKLINDLNLKSVMKEKLTDKDTITKEDVKEMVRRINLEDVLKKNIIESTPEVNQQQLEGILREESLVNAVLAALNIDISESSEAFENLSIEEMAVLQGAGDIEGEGFIATALLSGGACATLAGTAVSAVVSIFKK	LANTHIPEPTIDE	141	training set
MTTAVLHSVPAPVGLPADALADDDFELDIRVVISESPLTVLMCPTSDGCGNTCVNGASACQSSIEDAA	LANTHIPEPTIDE	68	test set
MSINEKSIVGESFEDLSAADMAMLTGRNDDGVAPASLSFAVSVLSVSFSACSATVVTRLASCGNCK	LANTHIPEPTIDE	66	training set
MTLLDLQSLETAKNEAHGEAGGTSTASLLLCGDSSLSITTC	LANTHIPEPTIDE	41	test set
MALLDLQAMETPAEENFGELATGSQVSLLVCEFSSLSVVLCTP	LANTHIPEPTIDE	43	training set
MKKILSLQKLSTKGTTTGGGGGGGGGSHASLLLCGDSSLSLTSCK	LANTHIPEPTIDE	45	training set
MTLLELQAIDPTVATGGKPPKRHSNYSVTLCAGGASNLSLLLCSGK	LANTHIPEPTIDE	46	training set
MSDWKKPIYESLSTEGNPAGDILRELSDSEMNQAMAGGTARSYCACYSGEHSCGRGCTITTECPFLTFICC	LANTHIPEPTIDE	71	training set
MALLDLQAMDSPVVDMATNSSSSGHSCTASDLSVALCGDHSGLSALLCHN	LANTHIPEPTIDE	50	training set
MSKNEKLAKLRNQEFDTKELIGSIDENELKKVAGAGDVNPETTPATPTIIGATIAVTASLCPTTKCTSRC	LANTHIPEPTIDE	70	discard
MNRNQVIEELSVKHPAGAKLVEVSKEELTRISGGGDVQPETTPLCAFGGGVALGLSLSKVYC	LANTHIPEPTIDE	62	training set
MTNFNSNEKFCGKSLKSLSADEMSLIYGASDGAEPRWTPTPIILKSAAASSKVCISAAVSGIGELQ	LANTHIPEPTIDE	66	training set
MAQKDFPQKINSQLLEEISDNSAVGAGWAQLSFISEALGNKGAVCTGTIECQNNCR	LANTHIPEPTIDE	56	training set
MEMVLDLQALETPEVLEGGGGGSHGGASNLSLLASCANSTVSLLTCH	LANTHIPEPTIDE	47	discard
MKKNLRSNVLKEEVAGNVMTELNEAELGEISGAGSEARGSNGGFCTLTVECNQLFTIVCCK	LANTHIPEPTIDE	61	training set
MRATTDSRPTGRAIHPEVKETIMAILDLQAMELPETEAAPIDDTLDHTSSLSVLNCGTSTVSTLLCL	LANTHIPEPTIDE	67	training set
MALLDLQALEASEQTGGGDSSLSLLCGKHSSHSVLLCL	LANTHIPEPTIDE	38	training set
MAENLFDLDIQVNKSQGSVEPQVLSIVACSSGCGSGKTAASCVETCGNRCFTNVGSLC	LANTHIPEPTIDE	58	training set
MSKGYKFTKEELVEAWKDPQVREKLKDLPKHPSGKALNELSEEELAEIQGASDVQPETTPLCVGVIIGLTTSIKICK	LANTHIPEPTIDE	77	training set
MALLDLQTIESEERTDGGGASTVSLLSCISAASVLLCL	LANTHIPEPTIDE	38	training set
MSNINMQAAAALDELSDAELDQVLGAGNGVYYTLSHECHMNSWQFIFTCCS	LANTHIPEPTIDE	51	training set
MAPLLELERTDAPTAATDDDFVLDMRVVESTTPLVVMMCSTSDGCGSSCSTSACTTKSCDPV	LANTHIPEPTIDE	62	training set
MALLDLQTMESDEQMGGGGANSTLSLLSCVSAASVTLCL	LANTHIPEPTIDE	39	training set
MVLLDLQTLEAPTGGGGGGGGSTLTVLGCESYKPSNLSLLLCH	LANTHIPEPTIDE	43	training set
MANVKDIKDPVLRQKMEILTDPKASVSIELTEQDMEALAGAGWYADLSASLGNRGSYCTITKECQACCN	LANTHIPEPTIDE	69	training set
MLELKMKEVVGEAFEDLSISEMTLVQGSGDMNGEFTTSPACVYSAVFASRASSKACVGGLTAVSGAALSALKC	LANTHIPEPTIDE	73	training set
MSLLDLQSMETPKDELTDEIATGGSRASLLLCGDSSLSVTTCN	LANTHIPEPTIDE	43	training set
MNREQFGASFTELTQEEMDFITGANGLAQPQATPTVVTSSVPCINITTSSWICISGGISAVSGLASYTKRCI	LANTHIPEPTIDE	72	training set
MALLDLQGLKAPAASGGASGGSSLTVATCGSAKPSNLSVALCH	LANTHIPEPTIDE	43	training set
MEKVLDLDVQVKANNNSNDSANDERITSHSLCTPGCAKTGSFNSFCC	LANTHIPEPTIDE	47	training set
MEFILDLQELDIPETQSQAMASGGGGGGSTTASNASLLLPCSHSTVSLLAC	LANTHIPEPTIDE	51	training set
MTLLDLQTMETPKAEATEELHTGSRASLLLCGDSSLSITTCH	LANTHIPEPTIDE	42	training set
MDVNQIIEALKDPKKRKNLNLSHPSGNGFQEMSLEEMNFITGGNGTVQPQVTPVLTPFTPYTPAISGGAAVSAVSGLVSYTKDCI	LANTHIPEPTIDE	85	training set
MKSKKVNTEIDTLEFEIDNQELNGTSGSGWWYTAFKMTLAGRCGLCFTCSYECTTNNVHC	LANTHIPEPTIDE	60	training set
MAKNTSRPEIDSLSFEVENQELSGKSGAGWFTAVQLTLAGRCGRWFTGSFECTTNNVKCG	LANTHIPEPTIDE	60	test set
MKQDNFEIDSLDYEINSQELNGKSAAGWYTAVRLTVQGRCGWWFTHSYECTSPNVRCG	LANTHIPEPTIDE	58	training set
MLDVIKNRKKIEEKLELPEILLEEVEEHSAMGGINTWNTTATSTSIIISETFGNKGKVCTYTVECVNNCRG	LANTHIPEPTIDE	71	training set
MEKILDLDVQVKAQKESNDSSGDERITSFSLCTPGCAKTGSFNSYCC	LANTHIPEPTIDE	47	training set
MSMTMTLQQAVVDDEFRSVLLADPAAFGLSVESLPGAVERQDHEAIEAFTEAVVASEIYACASTCSFGPFTIACDGTTK	LANTHIPEPTIDE	79	training set
MSTKDFNLDLVSVSKKDSGASPRITSISLCTPGCKTGALMGCNMKTATCNCSVHVSK	LANTHIPEPTIDE	57	training set
MASILELQDLEVERASSAADSNASVWECCSTGSWVPFTCC	LANTHIPEPTIDE	40	training set
MASILELQNLDVEHARGENRSDWSLWECCSTGSLFACC	LANTHIPEPTIDE	38	training set
MTASILQQSVVDADFRAALLENPAAFGASAAALPTPVEAQDQASLDFWTKDIAATEAFACRQSCSFGPFTFVCDGNTK	LANTHIPEPTIDE	78	training set
MSDFTLDFAEGDAADTVSPQITSKSLCTPGCITGWMMCNTVTKGCSFTIGK	LANTHIPEPTIDE	51	training set
MSTKDFNLDLVEVSKSNTGASARFTSHSLCTPGCITGVLMGCHIQSIGCNVHIHISK	LANTHIPEPTIDE	57	training set
MKKEELVGMAKEDFLNVICENDNKLENSGAKCPWWNLSCHLGNDGKICTYSHECTAGCNA	LANTHIPEPTIDE	60	training set
MTELNKRLQLKRDVSTENSLKKISNTDETHGGVTTSIPCTVMVSAAVCPTLVCSNKCGGRG	LANTHIPEPTIDE	61	training set
MKTEKKVLDELSLHASAKMGARDVESSMNADSTPVLASVAVSMELLPTASVLYSDVAGCFKYSAKHHC	LANTHIPEPTIDE	68	training set
MSALAIEKSWKDVDLRDGATSHPAGLGFGELTFEDLREDRTIYAASSGWVCTLTIECGTVICAC	LANTHIPEPTIDE	64	training set
MRNDVLTLTNPMEEKELEQILGGGNGVLKTISHECNMNTWQFLFTCC	LANTHIPEPTIDE	47	training set
MENKKDLFDLEIKKDNMENNNELEAQSLGPAIKATRQVCPKATRFVTVSCKKSDCQ	LANTHIPEPTIDE	56	training set
MNKELNALTNPIDEKELEQILGGGNGVIKTISHECHMNTWQFIFTCCS	LANTHIPEPTIDE	48	test set
MNKNEIETQPVTWLEEVSDQNFDEDVFGACSTNTFSLSDYWGNNGAWCTLTHECMAWCK	LANTHIPEPTIDE	59	training set
MKEKNMKKNDTIELQLGKYLEDDMIELAEGDESHGGTTPATPAISILSAYISTNTCPTTKCTRAC	LANTHIPEPTIDE	65	training set
MKEQNSFNLLQEVTESELDLILGAKGGSGVIHTISHECNMNSWQFVFTCCS	LANTHIPEPTIDE	51	training set
MKNSKDILNNAIEEVSEKELMEVAGGKRGSGWIATITDDCPNSVFVCC	LANTHIPEPTIDE	48	training set
MRNDVLTLTNPMEENELEQILGGGNGVLKTISHECNMNTWQFLFTCC	LANTHIPEPTIDE	47	test set
MKKELFDLNLNKDIEAQKSDLNPQSASIVKTTIKASKKLCRGFTLTCGCHFTGKK	LANTHIPEPTIDE	55	training set
MNNEDFNLDLIKISKENNSGASPRITSKSLCTPGCKTGILMTCPLKTATCGCHFG	LANTHIPEPTIDE	55	training set
MKNSKDILNNAIEEVSEKELMEVAGGKRGPGWIATITDDCPNSVFVCC	LANTHIPEPTIDE	48	training set
MKNSKDILNNAIEEVSEKELMEVAGGKRGPGWIATITDDCPNSIFVCC	LANTHIPEPTIDE	48	training set
MKEIQKAGLQEELSILMDDANNLEQLTAGIGTTVVNSTFSIVLGNKGYICTVTVECMRNCQ	LANTHIPEPTIDE	61	training set
MTKEHEIINSIQEVSLEELDQIIGAGKNGVFKTISHECHLNTWAFLATCCS	LANTHIPEPTIDE	51	discard
MNNSLFDLNLNKGVETQKSDLSPQSASVLKTSIKVSKKYCKGVTLTCGCNITGGK	LANTHIPEPTIDE	55	training set
MAKLDDFDLDIVVKKQDNIVQPNITSKSLCTPGCITGILMCLTQNSCVSCNSCIRC	LANTHIPEPTIDE	56	training set
MKEIQKAGLQEELSILMDDANNLEQLTAGIGTTVVNSTFSIVLGNKGYICTVTVECMRNCSK	LANTHIPEPTIDE	62	training set
MKSNLLKINNVTEMEKNMVTLIKDEDMLAGGSTPACAIGVVGITVAVTGISTACTSRCINK	LANTHIPEPTIDE	61	training set
MERRMSFMKNSKDILTNVIEEVSEKELMEVAGGKKGSGWFATITDDCPNSVFVCC	LANTHIPEPTIDE	55	training set
MSTKDFNLDLVSVSKTDSGASTRITSISLCTPGCKTGVLMGCNLKTATCNCSVHVSK	LANTHIPEPTIDE	57	training set
MSKFDDFDLDVVKVSKQDSKITPQVLSKSLCTPGCITGPLQTCYLCFPTFAKC	LANTHIPEPTIDE	53	training set
MNKDLNALTNPIDEKELEQILGGGDGVFRTISHECAMNTWMFIFTCCS	LANTHIPEPTIDE	48	training set
MNKDLNALTNPIDEKELEQILGGGDGVFRTISHECHMNTWMFIFTCCS	LANTHIPEPTIDE	48	training set
MRKNNNHKEIDTLDFEVKNQELSGKSGSGWFTAVQLTLAGRCGRWFTGSYECTSNNVKCG	LANTHIPEPTIDE	60	training set
MACGNVAAELDENSQALDAINGAGWKQTIVCTIAQGTVGCLVSYGLGNGGYCCTYTVECSKTCNK	LANTHIPEPTIDE	65	training set
MLDLQGMTPEYGGGDLSSASLLLCDKFSAFSTLLCL	LANTHIPEPTIDE	36	training set
MAVVRPLDTKEYVMALLDLQAMDTPQEEAVGDLATGSQISLLICEYSSLSVTLCTP	LANTHIPEPTIDE	56	training set
MALLDLQGLESPADLSATRGSSGSGHSCPSNLSATLCGGTSGLSVLICH	LANTHIPEPTIDE	49	discard
MSPSTILRQAAADAEFRTALLTDPEVFGVAADAVPESVEQQDQESLGFWTEGVAAIDAYACASTCSAGPFTFVCDGTTK	LANTHIPEPTIDE	79	training set
MANNNFDLDVQVKSVNSVNANFGLYTSQCYSSQCYSSKCYSDSCYSSDCYTGRHMCGYTHGYSC	LANTHIPEPTIDE	64	training set
MANNVFDLDVEVKSVNSVNQNIGLFTSTCFSSQCFSSKCFTDTCFSSNCFTGRHQCGYTHGSC	LANTHIPEPTIDE	63	training set
MKISKIEAQARKDFFKKIDTNSNLLNVNGAKCKWWNISCDLGNNGHVCTLSHECQVSCN	LANTHIPEPTIDE	59	training set
MTKTSRRKNAIANYLEPVDEKSINESFGAGDPEARSGIPCTIGAAVAASIAVCPTTKCSKRCGKRKK	LANTHIPEPTIDE	67	training set
MKGGNAMAENLFDLDVQVNKSQGSVEPKIWSIWNCSIGCGGGNTSKTCVETCSPCFSNLGTLC	LANTHIPEPTIDE	63	training set
MANNNFDLDVEVKAVNSETQNFGLFTSTCFTSQCFSSKCFTDTCFSSNCFTGRHMCGYTHGYSC	LANTHIPEPTIDE	64	training set
MKNQFDLDLQVAKDEVAPKEVQPASGLICTPSCLTGTLNCKVSLTFCRTC	LANTHIPEPTIDE	50	training set
MSNNQFDLDVQVSKNVGKIEPQVTSVFACTPGCITGPNCGSSECGTVPCGKTTSKYC	LANTHIPEPTIDE	57	training set
MNKDFDLNLKIAKSTDKDVKPQVTSVAYCTPGCNTGSTCGTSECGLTRNCTNTWLCG	LANTHIPEPTIDE	57	training set
MKNQFDLDLQVAKDEVASKGVQPASGIICTPSCATGTLNCQVSLTFCKTC	LANTHIPEPTIDE	50	training set
MANDAFDLDVQVNKSKGSIEPQVLTSIAACSAAACGGERTEHCGKTQGNCISNIGNWC	LANTHIPEPTIDE	58	training set
MNKDFDLNLKIAKGKDDSVQPQITSVAYCTPGCNTGSTCGSSECGLTRQCTNTWLCA	LANTHIPEPTIDE	57	training set
MFDLDVQVLKAASGEQPDIKSKLFCTPGCVDQTTKTSCCLKCKTSLCNSNMSCW	LANTHIPEPTIDE	54	training set
MANNPFDLDVQVNKSSDKFEPMVTSWFNCEKRFTTGCTQSCPTRDKGCFTNTCFNLC	LANTHIPEPTIDE	57	training set
MSNNQFDLDIQVSKNVGKIQPQYTSWSYCTTGCITGPNCNSSECATVPCKTTTNKCL	LANTHIPEPTIDE	57	training set
MENNLFDLDIQVKKSSDNIEPQVLSVWRCSGGCSDDGRTSATCVATAGKSCFTNIGSLC	LANTHIPEPTIDE	59	test set
MTNVEMVQAWKNPKLRTSGIAAHPAGEALVEVSADELARVHGGLAVQPDSTPTIVITITIVTTVICFPTPVY	LANTHIPEPTIDE	72	test set
MELNEISLSELSGGAEVQGLSQGNDGKVCTLTWECGLCPTHTCFC	LANTHIPEPTIDE	45	test set
MKQFNLEALRAIEDISDDELMVITGAVSVIDAQASGGVFCTVSHECHYNSVSPSSWLTCC	LANTHIPEPTIDE	60	training set
MKEEFVVSPVGPAFEELTLEEMHLIHGGSDVVPETTPFCGLPGGVTKENLSILYCRPS	LANTHIPEPTIDE	58	training set
MKEELAVSPVGPAFEELTLEEMHMIHGGGDVVPETTPICGYFIGVGAGVVFSVYKC	LANTHIPEPTIDE	56	training set
MKNHLFDAAGPAFEELSLEEMSTITGSGDVQPETTVPCIKTIVEIAKTSSSFCAGAGAGIGTGVTIVLSIKKC	LANTHIPEPTIDE	73	training set
MALNNQLEHSPVGKSLKSLSEEEMASIFGGNGMDVEVRSSLVCGAGISYVASYLASAAFKCGKKNKN	LANTHIPEPTIDE	67	training set
MTQEEIKLMNQSCGNGLKSLTMEEMQNIYGASDVEPRATPTIVPAISAAVRTSSKVCLSLVASAIGGIASHNNDCLG	LANTHIPEPTIDE	77	training set
MTQEEIKLMNHSCGSGLKSLSMEEMQNIYGASDVEPRGTPATIVSAVTRSSKPCISAIGSAITGIISHNKDCMG	LANTHIPEPTIDE	74	training set
MNKGWKNPYDRAHNAALPIENPIAELNADELLSVGGAATGAAEVRWAETILTSLACAAASYFIGNNGHVCTLTVECQKSCK	LANTHIPEPTIDE	81	training set
MKLKNQMENTNAATYNPVGSVLSELTDTEMDTVAGGAQAQGFTDGNCVSTITADCTPGWTWVC	LANTHIPEPTIDE	63	training set
MKMAVLKNPVLRNKIGYEGENPSGNVLEEIKDHDVVGAISWGTVLTTLACLGASYALGDKGQVCTATVECINNCRK	LANTHIPEPTIDE	76	test set
MSEEQLKAFIAKVQADPSLQEQLKAEGADVVAIAKAAGFTITTEDLKTARQTLSDDDLEGVAGGYEDGDYTKSISIVVACCRF	LANTHIPEPTIDE	83	training set
MSEEQLKAFIAKVQADSSLQEQLKAEGADPVSIAKAAGFTITTEDLNSHRQNLSDEELEGAAGGAGGTIPSLMTGCGWLTGLCVR	LANTHIPEPTIDE	85	training set
MSEEQLKAFIAKVQADASLQEQLRTEGADVVAIAKAAGFSITTEDLNSHRQNLSDDELESVAGGGGKMTVRGRDMSCGCQDYWEDDY	LANTHIPEPTIDE	87	training set
MSEEQLKAFIAKVQADASLQEQLRTEGADVVAIAKAAGFSITTEDLNSHRQNLSDDELEGVAGGGGGCDGIRITDKQTVADNTIVPCSCFHQ	LANTHIPEPTIDE	92	training set
MSEEQLKAFIAKVQGDTSLQEQLKAEGADVVAIAKAAGFSITTEDLNTHRQTLSDRELEGVAGGTTAFTGVDTESIAFCCS	LANTHIPEPTIDE	81	training set
MSEEQLKAFLEKVKADTSLQEKLKAAADSDAVLVIAKDAGFSISADDLKNAQSEISEEELESVAGGAGVTEATIDAGGGCTFNPCCR	LANTHIPEPTIDE	87	training set
MSEEQLKAFIAKVQADTSLQEQLKAEGADPVAIAKAAGFSITTEDLKEHRQALSDDDLEGVAGGTIVTVTGALISIAAEC	LANTHIPEPTIDE	80	training set
MSEEQLKAFLEKVKGDTSLQEKLQAAADSDAVLAIAKEAGFMISADELKKAQSEISEEELESAAGGRLKSGCHCGTVIRSYSKYC	LANTHIPEPTIDE	85	training set
MSEEQLKAFLEKVKADTSLQEKLKAAADSDAVLVIAKDAGFSISADDLKNAQSEISEEELESVAGGAQSAGGCGICECDNRQSTSCHYPSHG	LANTHIPEPTIDE	92	training set
MSEEQLKAFIAKVQADPSLQEQLKAEGADVVSIAKAAGFSITTEDLNSHITTKLNLSEEELEGVAGAMDCVSSTAQQTECRPGGPRASYCWDDLR	LANTHIPEPTIDE	95	training set
MSEEQLKGFLSKVQSDASLQEQLKVEGADVVAIAKAAGFSITTEDLNSHRQNLSEDELEGVAGGGLCTLTSNLAAVCCGGCRRATSE	LANTHIPEPTIDE	87	test set
MSEEQLKAFLTKVQADTSLQEQLKAEGADPVAIAKAAGFAITTEDLNSHRQNLSDDELEGVAGGGSSYRNGKCTFGPACPS	LANTHIPEPTIDE	81	test set
MSEEQLKAFIAKVQADTSLQEQLKVEGADVVAIAKAAGFSITTEDLNTHRQNLSDDELEGLHGAGPGCTGGWWAFTDCTAGGGSCEG	LANTHIPEPTIDE	87	training set
MSEEQLKAFIAKVQADTSLQEQLKVEGADVVAIAKAAGFSITTDDFERNTHRQTLSDDELEGVAGGKSTNGCGCKPGHTLSSFLCTLECWL	LANTHIPEPTIDE	91	training set
MSEEQLKAFIAKVQADSSLQEQLKAEGADVVAIAKAAGFSITTEDWDQRPVRTLSDEELEGAAGGCCITGESPGSAPTNDYKCTKGRGPGGCY	LANTHIPEPTIDE	93	training set
MSEEQLKAFIAKVQADPSLQEQLKAEGADTVAIAKAAGFSITTEDLKEHRQTLSDDELESVAGGGNDTVITKEYSCYVTSDKGCC	LANTHIPEPTIDE	85	training set
MSEEQLKAFLEKVKADTSLKEKLKAAKSPEDVVGIAKEHGHEFTADKISQLSEEELEGVAGGMQAGSCNWICFVNGVYINDGRMANKAI	LANTHIPEPTIDE	89	training set
MSEEQLKAFLAKVQADASLQEQLKAEGADVVAIAKAAGFSITTEDLNSHRQIEMTDDELEGVAGGGCGLGARRETAQCWLSH	LANTHIPEPTIDE	82	training set
MSEEQLKAFIAKVQGDTSLQEQLKAEGADVVAIAKAAGFAITEAEVKAYQTRNLSDEELDEVAGGAPCRPFTDPIYCWRKGEQTIIGRGRSCLYPE	LANTHIPEPTIDE	96	training set
MSEEQLKAFIAKVQADTSLQEQLKAEGADVVAIAKAAGFAISTEDLNNHRQNLSDDELEGVAGGGICVYVNCVLSIRETPSVI	LANTHIPEPTIDE	83	test set
MSEEQLKAFLEKVKADTSLQEKLKAAAGSDAVLAIAKAAGLMISADDLTKAQSEISDAELEDAAGGGAQGPACCAAMESSDTRCGWVSWVLSEVVPPQ	LANTHIPEPTIDE	98	training set
MQEQLKAEGADVIAIAKAAGFSITIEDLKEHRKTLSDAELEGLAGGAFNHDWGQTTRNYKCETSYCC	LANTHIPEPTIDE	67	training set
MNNSMDKLKLNLEDLQLESFVTSIDSEVAKRLSGGLGNVSEPTHTVPTDDHHPTEQVICTTVQCLGNVSEPTHTVPTDDHHPTEQVICTTVQC	LANTHIPEPTIDE	93	training set
MNNSMDKLKLNLEDLQLESETTSIDSEVAKRLSGGLGNVSEPTHTVPTDDHHPIEQVICTTVQCLGNVSEPTHTVPTDDHHPIEQVICTTVQC	LANTHIPEPTIDE	93	training set
MNNSLDKLELNLEDLQLESFVTSIDSEVANRLSGGLGNVSEPTHTEPTDDHHTPPVKCTTVVCLGNVSEPTHTEPTDDHHTPPVKCTTVVC	LANTHIPEPTIDE	91	test set
MKNQSEKLELNLEDLQLESTVTSIDSEVAMRLSGGLGNVSEPTHTEPTDDHHTPAIKCTTVICLGNVSEPTHTEPTDDHHTPAIKCTTVIC	LANTHIPEPTIDE	91	training set
MKNQSEKLKLNLEDLQLESFVTSIDSEVAHRLSGGLGNVSEPTHTEPTDDHHTPAIKCTTVICLGNVSEPTHTEPTDDHHTPAIKCTTVIC	LANTHIPEPTIDE	91	training set
MKNHAEHLKLNLEDLQLESFVTSIDSEVASRLAGGLGNLSHPTHTEPTDDHHNPPVOCTTVICLGNLSHPTHTEPTDDHHNPPVOCTTVIC	LANTHIPEPTIDE	91	training set
MKTNSENLKLSLEDLQLESFVTSIDSEMAARLSGGLGALEHPTHTEPTDTDDTPHAQCTTIVCLGALEHPTHTEPTDTDDTPHAQCTTIVC	LANTHIPEPTIDE	91	training set
MKDNQVTQIKLSIDDLKIDSFVTSIDSEMNIRLAGGLAGQSHPTHTVATDDQGHLCTTIICALAGQSHPTHTVATDDQGHLCTTIICA	LANTHIPEPTIDE	88	training set
MKEQSNNLQLSIDDLKIDSFVTSLDNEMNMRLAGGLAGQSHPTHTLQTDDEHHLCTTIICLAGQSHPTHTLQTDDEHHLCTTIIC	LANTHIPEPTIDE	85	training set
MENNKKMELKIEDLKIESIVTADKDLSKKLQGGLGISAAGDHDHPTHTIKTQDRLHVCGTVQCLGISAAGDHDHPTHTIKTQDRLHVCGTVQC	LANTHIPEPTIDE	93	training set
MENNKKMKLNIDDLKIESFVTALDKDLSKKLQGGLGIAPAGDHDHPTHTIKTQDKLHVCGTVQCLGIAPAGDHDHPTHTIKTQDKLHVCGTVQC	LANTHIPEPTIDE	94	training set
MENSKIMKDIEVANLLEEVQEDELNEVLGAKKKSGVIPTVSHDCHMNTFQFMFTCCS	LANTHIPEPTIDE	57	training set
MTNMSKFDDFDLDVVKVSKQDSKITPQVLSKSLCTPGCITGPLQTCYLCFPTFAKC	LANTHIPEPTIDE	56	training set
MALLDLQTIETEERTDGGASTVSLLSCISAASVLLCL	LANTHIPEPTIDE	37	training set
MDDDYELDLRLVDAGTAASGHATSTDDNCGSGNTRSDACTTKADGS	LANTHIPEPTIDE	46	training set
VTPQNAPAPVVDPDSALDLDEFDLDVTVVESGQLVEELIRMTDDGCGTTCQSACPNTCPGD	LANTHIPEPTIDE	61	training set
MSEVSLSGSATALAERPGEDDEYTLDVRVLVAYGPIMGDCPTDDGCGNTCSGNDSSCNSFADDPS	LANTHIPEPTIDE	65	training set
MTAQIDTPNGSAFDLDLTIVESGPVIPVLMGNTDDNCGVSCQSACSNSNCE	LANTHIPEPTIDE	51	training set
MEEPLMSAPTIDTVADSDFDLDLRITTTVTPGVASACDTSDGCDPTCASSCISTV	LANTHIPEPTIDE	55	training set
MTSATLSPPAPLAGLDDDFAPLDVKVVIAEHAYGKLMCSTGDGCGTTCATGASACGSFTEDPA	LANTHIPEPTIDE	63	training set
MASAAVLTKPITETTTAPAEDPFDVQVEVVTEIDAEQLPQACGTGDGCKSTCASSCTSAV	LANTHIPEPTIDE	60	training set
MNPEAATTQVDVDFTLDVRVIEAGLPVRDLLRDTSDNCGSSCSGTACTSFVGDPA	LANTHIPEPTIDE	55	discard
MDHTPTATADLDWDLDITIVESGGVVDDLLRLTDDGCGATCESACNSCP	LANTHIPEPTIDE	49	training set
MSTQSAEQFDLDVRFLDSVPVIPELMTNTDDNCGSTCQSACSNSSC	LANTHIPEPTIDE	46	training set
MSAALAVDYAESPDAAVDDAEFELDMRVVESTTKLVIMMCDTSDGCGNTCSTSACSTGSNDPF	LANTHIPEPTIDE	63	training set
MTMDAFTSDVAGTGFGELDLDVTIVEQGDAADALLCTTDNGCSTNKNSDC	LANTHIPEPTIDE	50	training set
MTSGSASAVLERTEATPLGLLDEFRLDVQVTVEAAPGYTIRACDTSDTCGSTCASACASD	LANTHIPEPTIDE	60	training set
MDNEHDLDLNLVDAGPVASPHATGTDDNCGSGNTKSDACTTKADGS	LANTHIPEPTIDE	46	test set
MTVQLEGPIASARPADEQYDLADFELDITIVEGGPAADQLIRLTNDGCNSTCATACVSCP	LANTHIPEPTIDE	60	training set
MENLLAVSGDPFQLDVEIVTEGPVAAALLADTDDGCDTVKGSDC	LANTHIPEPTIDE	44	training set
MIHTALLDPTEVDGEEDFAPLDVKVVVAAHPHGKLLCATNDGCGNTCANGASACTSFTEDPA	LANTHIPEPTIDE	62	test set
MTAIQTERPTAPAQADLVKNDNDPFGLDITFIEGTPATETALMCGTGDNCGSSCPSACTTS	LANTHIPEPTIDE	61	training set
MRTEIVLHNDDLDLDLDLDLRVSDLPEGTEQFGQGTFTSPSSYAIGTRCPVCC	LANTHIPEPTIDE	53	test set
MTRPVTQSTTQVQEPTATSQSDGFDLNVSLLEVSDAAGLTSLTDDNCGSTCGACTTNVA	LANTHIPEPTIDE	59	training set
MTSATLAPPAPLAGLDDDFAPLDVKVVIAEHAYGKLMCSTGDGCGTTCATGASACGSFTEDPA	LANTHIPEPTIDE	63	training set
MLITLSHFQQPTEPDDEGFPVDWELTTTVTTSPVPIVEACGSGDGCKSTCASSCISS	LANTHIPEPTIDE	57	test set
MTSATLAPPPVAPAPSADLDDDFAPLDVKVVIAEHSYGHLMCSTGDGCGTTCATGASACGSFTEDPA	LANTHIPEPTIDE	67	training set
MQNDEFDLDISVLESDDGSATLINLTDDGCGSTCSSPCATNVA	LANTHIPEPTIDE	43	training set
MFDLDLEIGVEKSVAGPAVTSISYCTPGCTSDGGGSGCSHCC	LANTHIPEPTIDE	42	training set
MTQALEQTAAPGELDEFTLDISVVEDSLPLAKMSCDTSDGCGGTTCGSACTSQVAQTPY	LANTHIPEPTIDE	59	training set
MTSATLASPLVTPSADLDDDFAPLDVKVVIAEHSYGHLMCSTGDGCGSTCATGASACGSFTEDPA	LANTHIPEPTIDE	65	training set
MEPVETVETVDLFDLDIRVGVGNIQGNAAINSWSYCTPGCTSSGGGSGCSHCC	LANTHIPEPTIDE	53	training set
MATSTPIDDEFALNVEVVVSTHPNGKLMCNTGDGCGNTCQQGASACNSFVGDPA	LANTHIPEPTIDE	54	training set
MLTGRNDDGVAPASLSFAVSVLSVSFSACSVTVVTRLASCGNCK	LANTHIPEPTIDE	44	training set
MDIVRSWKDPQSRSADMAHPSGSAEIAELTELEMDEVSGAGSGLVGTFGCCWCVPWYSGWTVCGLVCDHPGC	LANTHIPEPTIDE	72	training set
MSTATITRAWTDVEFRAGLSTEELELVEHPAGDLDAELRELYIHEATAQSTNCTKWTGSPNCCC	LANTHIPEPTIDE	64	training set
MVSPRWDMLLDAGEDTSPSVQTQIDAEFRRVVSPYMSSSGWLCTLTIECGTIICACR	LANTHIPEPTIDE	57	training set
MLLDAGEDTSPSVQTQIDAEFRRVVSPYMSSSGWLCTLTIECGTIICACR	LANTHIPEPTIDE	50	training set
MDIVRSWKDPEFRASFPSAAHPAGPAELTPLELGDASQAAGGRTENLATFGCCFSPQTFTYTSPILCSVTLSVC	LANTHIPEPTIDE	74	training set
MESQAEVTWIEEVGEQSFDTDVFGACSTNTFSLSDYWGNRGYWCTLTHECMSWCK	LANTHIPEPTIDE	55	training set
MIMTLLDLQTMETPKPEATDELCHGSRASLLLCGDSSLSVTTCN	LANTHIPEPTIDE	44	training set
MNLYDLQSMETPKEEAMGDVETGSRASLLLCGDSSLSVTTCN	LANTHIPEPTIDE	42	training set
MAMLDLQGMTPEYGGGDLSSASLLLCDKFSAFSTLLCL	LANTHIPEPTIDE	38	training set
MALLDLQTMETEDRTEGGGPSTLSLLSCVSAASVTLCL	LANTHIPEPTIDE	38	training set
MALLDLQTMESDENHGGGGASTASLLSCVSAVSVLLCL	LANTHIPEPTIDE	38	training set
METPAEENFGELATGSQVSLLVCEYSSLSVVLCTP	LANTHIPEPTIDE	35	training set
MEFVLDLQATETPDAHLEVAGGGAGGSRASLLLCGDSGLSVVTCN	LANTHIPEPTIDE	45	training set
MEFILDLQELDVPEAQSQAMASGGGGGGSTTASNASLLLPCSHSTVSLLAC	LANTHIPEPTIDE	51	training set
MELVLDLQALEAPEVLEGGHGGGGGGSNLSLLASCNNSTISLLTCH	LANTHIPEPTIDE	46	training set
MALLDLQAMETQAEESFGELATGSQVSLLVCEYSSLSVVLCTP	LANTHIPEPTIDE	43	training set
MEILELQSLETPVEDTTANASTLSVVNCGVSTVSTILCL	LANTHIPEPTIDE	39	training set
MALLDLQGMELADRTGGGGGGGGSRASLLLCGDSSLSVTTCN	LANTHIPEPTIDE	42	training set
VSALTATPTPAGLIATGRDRALSLDGDLFDLDLRVQVPVTDESLWSMTNDGCGQTCETACTQSCTDNG	LANTHIPEPTIDE	68	training set
MIHMSEVSLSGSATALAERPGEDDEYTLDVRVLVAYGPIMGDCPTDDGCGNTCSGNDSSCNSFADDPS	LANTHIPEPTIDE	68	training set
VGMTAQIDTPNGSAFDLDLTIVESGPVIPVLMGNTDDNCGVSCQSACSNSNCE	LANTHIPEPTIDE	53	training set
VAIQMDHTPTATADLDWDLDITIVESGGVVDDLLRLTDDGCGATCESACNSCP	LANTHIPEPTIDE	53	training set
MNGQTGSVMTMDAFTSDVAGTGFGELDLDVTIVEQGDAADALLCTTDNGCSTNKNSDC	LANTHIPEPTIDE	58	training set
MTMTSGSASAVLERTEATPLGLLDEFRLDVQVTVEAAPGYTIRACDTSDTCGSTCASACASD	LANTHIPEPTIDE	62	training set
VSWQYHLSATSNESPGVVMTRPVTQSTTQVQEPTATSQSDGFDLNVSLLEVSDAAGLTSLTDDNCGSTCGACTTNVA	LANTHIPEPTIDE	77	training set
VSVQQIEDAAIAPHPQGAGEEGSFEDWDLDVSIVESGPSADRLIRMTDDGCGVTCESACSTTCP	LANTHIPEPTIDE	64	training set
VLITLSHFQQPTEPDDEGFPVDWELTTTVTTSPVPIVEACGSGDGCKSTCASSCISS	LANTHIPEPTIDE	57	discard
LREVRIAIHAHPHVHVISTEDTMGINGPAQTQDDGMFDLDLEIGVEKSVAGPAVTSISYCTPGCTSDGGGSGCSHCC	LANTHIPEPTIDE	77	training set
VTEMTQALEQTAAPGELDEFTLDISVVEDSLPLAKMSCDTSDGCGGTTCGSACTSQVAQTPY	LANTHIPEPTIDE	62	training set
VIPMATSTPIDDEFALNVEVVVSTHPNGKLMCNTGDGCGNTCQQGASACNSFVGDPA	LANTHIPEPTIDE	57	training set
MSARPGQRAARDTRAPALPPTAPAALKPAPAGADQESHPVPVTKGMIMTLLDLQTMETPKPEATDELCHGSRASLLLCGDSSLSVTTCN	LANTHIPEPTIDE	89	training set
VNSTPVAERKEVVMNLFDLQSMETPKEEAMGDVETGSRASLLLCGDSSLSVTTCN	LANTHIPEPTIDE	55	training set
VTGSSRTTRPLRKETIMNLFDLQSLETPKDEAIGDVETGSRASLLLCGDSSLSVTTCN	LANTHIPEPTIDE	58	training set
VDREGKGKEMALLDLQTMESDEHTGGGGASTASLLSCISAASVLLCL	LANTHIPEPTIDE	47	training set
VKKMTEEMTLLDLQGMEQTETDSWGGSGHGGGGDSGLSVTGCNGHSGISLLCDL	LANTHIPEPTIDE	54	training set
VAVVRPLDTKEYVMALLDLQAMDTPQEEAVGDLATGSQISLLICEYSSLSVTLCTP	LANTHIPEPTIDE	56	training set
MKGNTMELVLDLQALEAPEVLEGGHGGGGGGSNLSLLASCNNSTISLLTCH	LANTHIPEPTIDE	51	training set
MDYIRAWKDPVYRASLSAEDRASLPANPAGFVELNDQELDGADGGTWTPTPTITVVTGAAGCFSFNGTFCNGTCAAFTAGCCG	LANTHIPEPTIDE	83	training set
MSDHEIIRSWKDEEFRNSLGPAQRAVLPGNPAGLIELTDEALDDLIAGAAALDSCCWSSCNSTQ	LANTHIPEPTIDE	64	test set
MAQKDFHQKINSQLLEEISDNSAVGAGWAQLSFISEALGNKGAVCTGTIECQNNCR	LANTHIPEPTIDE	56	training set
MPTQNMLTKSPVKYTEHLLQRAIVDAEFRHELLCRPEEFGITKEDLERLPDAVEEQNMTFVELVVESYGNSDIKAAGTCKSGLTYTCDGRDDNPPPGDTCQTTCSFGWTVYCDGNTL	LANTHIPEPTIDE	117	test set
MFFEGDASLVEEIADQDFEGVAYGACTTNTFSLSNALGNNGGWCTLTKECQPNCN	LANTHIPEPTIDE	55	training set
MNKDENNSIETLSYEIENQELEGKSGSGFFTAFQLTLAGKCGEWFTGSYECTTNNVSC	LANTHIPEPTIDE	58	training set
MAQQIAPESAAVGDEFDLDVRTVEATDMAALQVLTDDGCGSTCGACTTGLH	LANTHIPEPTIDE	51	training set
MTKQEMIQAWKNPKLRVAGEGIDHPAGDALVELSADELARVHGGLGVQPDSTPTITVTVIGVTVLVCFPGHAG	LANTHIPEPTIDE	73	training set
MANPNVGILEEIDDQNLDSVSAAGQGWGTLVSSLSCYGASYVLGNNGNFCTATAECQNNCK	LANTHIPEPTIDE	61	training set
MSIQFGTAPAALPPVTEQAAGFEDWELDVSIVESGPEADKLIRMTDDGCGTTCQSACSPTCP	LANTHIPEPTIDE	62	training set
MTRSTVVSSRTEVRPQIPGASDGFDLDVSLVEIADPAGLVNLTDDNCGSTCGACTTNVA	LANTHIPEPTIDE	59	training set
MELKALDLVGPSFEELSTEEMEMVQGSGDVKPETTPACLAGFTIGLGIGALASAAGC	LANTHIPEPTIDE	57	training set
VKKNNVAETLVANPVEELLLRAVIDPEFRSEILTNPEAFGIPTNTETLVFLHSVAQQDMSFVELVNDSTNFAAPGSDNCRCTCVTGFTLRCDGTSM	LANTHIPEPTIDE	96	training set
MALPLTLDATEPLDGSMVVGEEEFVLDMKVVESTTPLVTMMCSTSDGCGSTCSTSACSTSSNDPF	LANTHIPEPTIDE	65	training set
MTMQLEGPVASAQPAVELRESDDFDLDVTIAEGGPAADQLIRLTNDGCNSTCATACVSCP	LANTHIPEPTIDE	60	test set
MKAINHEAATALQELTDNELDQILGADGVISTLTHECHMNSWQGLLTCCS	LANTHIPEPTIDE	50	test set
MKNIIGPSFEELSNEEMQTIQGSGDVQAESTPICAVAATAAASSGVCAATGAGVVTGVTVVVSLKSC	LANTHIPEPTIDE	67	test set
MLGNDKVIDSLEFEVAQQELEGNSGAGTRTAIRMTSQGRCGWIFTFSYECSANHIRCS	LANTHIPEPTIDE	58	training set
MKGGLTMAKNPFDLEVKVDKINGAELDGLYTSTCYTSSCYTSTCYTSTCYSSDCYTGQNMCGYTHTSSC	LANTHIPEPTIDE	69	training set
MTRSTVVPSRTEVRPQIPGASDGFDLDVSLVEIADPAGLVNLTDDNCGSTCGACTTNVA	LANTHIPEPTIDE	59	training set
MSDINMKEIVGDTFEDMSIAEMTMVQGSGDVGAEFTTSPACVALSVAATQASSARCAIASAGVASLVSGAVHSALKC	LANTHIPEPTIDE	77	training set
MSQYDVALFEEIAEQDFDSVAYGACTTNTFTLSNVLGNQGGWCTLTVECQPNCK	LANTHIPEPTIDE	54	training set
IPVYKGDVSLVEEIAEQDFDGVAYGACTTNTFSLSNKVGNNGGWCTITKECTNACN	LANTHIPEPTIDE	56	training set
MNDTLETETPVMVSPRWDMLVDAGEDTSPSVQTQIDAEFRRVVSPYMSSSGWLCTLTIECGTIICACR	LANTHIPEPTIDE	68	training set
MEELKNVLVSLTDEELEEAAGAAGCGWSCTITDDCPNSVFVCC	LANTHIPEPTIDE	43	training set
MTRNVAQSTTQVQEPAPQEDGFTLNVGLLEVSDAAGLTNLTDDGCGSTCGACTTNVA	LANTHIPEPTIDE	57	training set
MSPSLILEGADVVAEEEFELDMRVVESATPLVAMMCDSSDGCGSTCSTSACSTNSNDPA	LANTHIPEPTIDE	59	training set
MTAIHTEQPPTAAQPSADTFDEADPFGLDITFIEGTPATETVLMCSTGDNCGSSCPSACTTS	LANTHIPEPTIDE	62	training set
MANINMKEIVGDTFEDMSIAEMTMIQGSGDVNAETTIELFISVTLAATAAAGSYASGVQVVKTIKGKC	LANTHIPEPTIDE	68	training set
MPKDHEGDIELTTEINEQEFDDPTVGGSGEVGAATISSWLGNDGKLCTATVECMPTCN	LANTHIPEPTIDE	58	training set
IREKFLKNPVLQSKHSLDVENPSGNLFEEISEQDMSAMAGGTNDWASKQAANLTGLGNNYGRTCTLSAECNGTDSY	LANTHIPEPTIDE	76	training set
MSIRLAETPPASPAPGPGSEVEPDAGPGLEPDFELDITFVESGPQADRLIRMTDDGCGKTCQSACSSTCP	LANTHIPEPTIDE	70	training set
MGTHGIAQHDEADLFDLDLEIGVEKSVAGPAITSISYCTPGCTSDGGGSGCSHCC	LANTHIPEPTIDE	55	training set
MAKFDDFDLDIVVKKQDNIVQPNITSKSLCTPGCITGILMCLTQNSCVSCNSCIRC	LANTHIPEPTIDE	56	training set
MSPQPQNNTNLFDLDLEIGVERSIAGPAITSVSYCTPGCTSEGGGSGCSHCC	LANTHIPEPTIDE	52	training set
MSAALAAPPVDVVDDAEFELDLRVVESTTKLVITMCDTSDGCGNTCSTSACTTFSNDPY	LANTHIPEPTIDE	59	training set
VKEKNELFDLDVKVNAKESNDSGAEPRIASKFLCTPGCAKTGSFNSYCC	LANTHIPEPTIDE	49	training set
MKREDVLNALESANPAGEALVELSHAELSRVFGGGDVQPETTPVCAVAATVAASSATCAAVGGGIAVGVTIVLTIKSC	LANTHIPEPTIDE	78	training set
MNTERAWKDPDYRDGLSEDETADLPENPAGTSSLDNRRLNEVHGGTVVTTQPVHTLALCPMTLRPALCGSPSGG	LANTHIPEPTIDE	74	training set
ISKEVQLAQVTWLEEVVDQEFDDDVFGACTTNTFSLSDYWGNDGSWCSLSHECMSWCK	LANTHIPEPTIDE	58	training set
MEKFLKNPVLQSKHSLDVENPSGNLFEEISEQDMSAMAGGTNDWASKQAANLTGLGNNYGRVCTLSAECNGTDPCGGTK	LANTHIPEPTIDE	79	training set
MNKDFDLNLKADKSTTEGPAPRITSVAYCTPGCITGDLCGSSECCLTRNCTGSILCA	LANTHIPEPTIDE	57	training set
MIVESATLTPAAPAPVQALASQQSQDWTGEDWAAGLDVSIVESGVAAEQLIRMTDDGCNSTCATACISCGT	LANTHIPEPTIDE	71	training set
MPKFDDFELDVKQVSNPKDTVEPMVGSRYACTPGSCWELVCFTTTK	LANTHIPEPTIDE	46	test set
MSTLTPEETATVDTGETFDPFALNIEFIENTPAADTVLMCTTGDNCGTSCPSACTTS	LANTHIPEPTIDE	57	training set
MSEVLFSGGATALAERPVADDDEFALDVRVVVAYAPVMGDCPTDDGCGNTCAGNDSACNSFADDPS	LANTHIPEPTIDE	66	test set
MPKYDDFDLNLKQNVSAPNKEARVTSLFWCTPGTCNNTCKGDSTLKSNCCGGSIICSLGGC	LANTHIPEPTIDE	61	training set
NNSGASPRITSKSLCTPGCKTGILMTCPLKTATCGCHFG	LANTHIPEPTIDE	39	training set
MSPMMEEEIMDIETGIQAGCTTNTFSLSDYLGNTGGWCTATKECMPSCN	LANTHIPEPTIDE	49	training set
MNKDFDLNLKADKSATEGPAPRITSVAYCTPGCVTGELCGSSECGLTRNCTGSILWA	LANTHIPEPTIDE	57	training set
MAAQTPGLTGSDADLADLFRLDITFIEHGPNANAVIAMTDDNCGTTCPSTCTTSAGA	LANTHIPEPTIDE	57	training set
MPKYDDFDLNLKQVSNTDHKNPRITSLIACTPGTCNSKCPNTNWLCSNVCVTKTCWTCA	LANTHIPEPTIDE	59	training set
MSNVPVQNGISPSSPSGDGFDLDVALLEVGDVAGLTNLTDDNCGTTCGACTTNVA	LANTHIPEPTIDE	55	training set
MTRIVTKSTTQVQEPTAGGQSDGFDLNVSLLEVSDAAGLTVLTDDGCGSSCGACVTFTD	LANTHIPEPTIDE	59	training set
MNPENELNLRLVDAGPAANAYATSTDDNCGSGNTGSDACSG	LANTHIPEPTIDE	41	training set
MDTMDTSEFRLNIQLVDAGPAPATGSDDCTSDKCGSGETGSDACTTNG	LANTHIPEPTIDE	48	training set
MSNINMQAVAALDELSDAELDQVLGAGVGVFYTLTHECHMNSLQRRLTCCS	LANTHIPEPTIDE	51	training set
ELVEAWKDPQVREKLKDLPKHPSGKALNELSEEELAGIQGASDVQPETTPLCVGVIIGITASIKICK	LANTHIPEPTIDE	67	training set
MTQENMNRIVGETFEDMSVAEMTMVQGSGDLGAEFTTSPACVALTVAAAQQSSNNCAVAISGSLSAIGSAVLSAIKC	LANTHIPEPTIDE	77	training set
MNKDFDLNLKADKSATEGPAPRITRVAYCTPGCVTGELCGSSECGLTRNCTGSILCA	LANTHIPEPTIDE	57	training set
MSTPTIEQAATVDAGATFDPFDLDITFIENTPAAETVLLCGTGDNCGSSCPSACTTS	LANTHIPEPTIDE	57	training set
MNKELFDLDINKKMESSTEMTAQTLTTIVRVSRAVCRTGTCICTTSCSNCK	LANTHIPEPTIDE	51	training set
MPKYDDFDLNLKQNISNSNNKEPRITSIKWCTPGTCNNTCQGNSTLKSNCCGGSLICSLGGC	LANTHIPEPTIDE	62	training set
MSAPTIETQTQVASVEGQGGGFDPFDLDIAFIEGTPAADTVLMCGTGDTCGSSCPSACTTS	LANTHIPEPTIDE	61	training set
LPKFDDFDLNVKQASEKDVVKPEVGSRYLCTPGSCWKWVCFTTTA	LANTHIPEPTIDE	45	training set
AWKDPQVREKLKDLPNHPSGKALNELSEEELAEIQGASDVQPETTPLCVGVIIGLTTSIKICK	LANTHIPEPTIDE	63	training set
MKNIVGDSFEDMSIAEMAMVQGSGDLEGESVIATLLAVSAAVGSAAGAIQVVKTIKGTC	LANTHIPEPTIDE	59	training set
MNKDFDLNLKTDKNTTEGSAPRITSVAYCTPGCITGELCGSSECGLTRNCTGSILCA	LANTHIPEPTIDE	57	training set
MENNLFDLDLKVEKSSNGVEPRITSVALCTPGTCACNDGPTFDSACCSVELTVYYCTR	LANTHIPEPTIDE	58	training set
MPKYDDFDLNLKQNVSDPNQEPRVTSLFWCTPGTCNNTCKGGSTLKSNCCVGSILCSLGGC	LANTHIPEPTIDE	61	training set
VSVQSEEAVATVPAAVEGQEGMVDGWDLDVSIVESGPEADRLIRMTDDGCGETCESACSTTCP	LANTHIPEPTIDE	63	test set
MRTETTVQSDTTDFDLDLRIADVAEQTEEFGRGTYTSPSSYAIGTRCPVCC	LANTHIPEPTIDE	51	training set
MTIQLDTPTPAAAPDTDFDLDISIVASGPVVADLMRNTDDNCGSSCQSACSNSTC	LANTHIPEPTIDE	55	training set
MTVQSAAQDVAEPGSLLAGLDITVVEAGPATLSRRCSTDNGCDTLANGDC	LANTHIPEPTIDE	50	training set
MELFINKHPEQYKLLLKKAQAALELSVSGGSFESLSEEEMKALQGSGSVNEGTTVVCLAVEATLGSTKNNL	LANTHIPEPTIDE	71	training set
MQWKNQMENLNAATYNPVGSVLSELTDTEMDTVAGGAQALGFTDGNCLVSITADCTPWIWGC	LANTHIPEPTIDE	62	training set
MSEMNASIFEEIQDQSMDDIMAGDAAPNTISITNPLIACALLSRNNTGRFCTVTVECNVPGPVC	LANTHIPEPTIDE	64	training set
MENNLFDLDLKVEKSSNGVEPRITSYAFCTPGTCACEDGPTFDSACCSVELTIYNCK	LANTHIPEPTIDE	57	training set
MTTSTIEQATDQANEVAGAETEFDPFNLDIKLAENTPAANTSLRCGTGDTCGSSCPSACTTS	LANTHIPEPTIDE	62	training set
MKKESIVRAWKDPAFRASLSAEERASLPESPSGRALTELDESELLGVTGGRAALEPSTGCTDGVPTCGIVMCRDLEVA	LANTHIPEPTIDE	78	training set
MKKSLFDQIAKEDMENILVEIDEHQEMAGFNTWNTISTSTCIAVSHFVGNDGKVCTYTVECVNNCR	LANTHIPEPTIDE	66	training set
MTSATLSPITEPTSLDDDFAPLDVRVVVAAHPHGKLMCSTGDGCGSTCSNGASACNSFVEDPA	LANTHIPEPTIDE	63	training set
RVSDLPEQAESFGQGTYTSPSSYAIGTRCPVCC	LANTHIPEPTIDE	33	training set
MTPSLTLDATDIQNLADGVADEEFELDMRVVEATTPLVTMMCATDDGCGTTCSTSACSTSSNDPS	LANTHIPEPTIDE	65	training set
MEWSPTTVATPAAEVEMGSEFDLDITLVEVVDPAHLINMTDDGCGTTCEKSTCISAA	LANTHIPEPTIDE	57	test set
NNNTNDSAGDERITSHFLCSFGCGKTGSFNSFCC	LANTHIPEPTIDE	34	training set
MSKQDQKAQELLIEAWKDPEIREKAKNFPQHPSGKAIHELTVEELAEIQGASDVQPETTPACVTALTTGIIFSIKWC	LANTHIPEPTIDE	77	training set
MTNKNVSILEEISEQGLDAVGAGSDADPNSISIASLCPSCLASWAIGNPGWACTLSVECQGSC	LANTHIPEPTIDE	63	training set
MTAIQAERPTTPAQADPVKTDDDPFGLDITFIEGTPATETVLMCSTGDTCGSSCPSACTTS	LANTHIPEPTIDE	61	training set
MEKFNNDFNLDVTVSKDDTKKADVKITSKSLCTPGCVTGLLMGCAGSSATCNCSVHVG	LANTHIPEPTIDE	58	training set
MTLALKRPSEDAEISALASPAEESDEFSLDLTVIADSLPLAKMSCDTSDNCGGTTCGSACTSHVATPL	LANTHIPEPTIDE	68	training set
MSIPTYQPAQPADAVAEPVPVEEWELDTTVTRAPTPIVEACGTGDGCAKTCASSCASS	LANTHIPEPTIDE	58	training set
MNSTCGKGLKSLSTEEMENVYGASDVDPRWTPIASAAINSAARSSKICISAVGSAIGGIVSYNKNCAG	LANTHIPEPTIDE	68	test set
MNRNQVMEELKMNNPAGATMVEVSEEELTRVYGGGDVQPESTPACVGAGITVGIAISKLLC	LANTHIPEPTIDE	61	training set
MSIEEIVKAWKAEESALDNTVPANPIGEELSDEALQEVTGGMYCTLWSCDIQVTCDFADTSDIGTY	LANTHIPEPTIDE	66	training set
MTRNIAQSTTQVQEPVAQEDGFTLNVSLLEVSDAAGLTNLTDDNCGTTCGACTTNVA	LANTHIPEPTIDE	57	training set
MTATMLSPITTATTRASAVTAAPEAPTDPFDVDLTIVTEIGADLLPQACGTGDGCAASCASSCASAV	LANTHIPEPTIDE	67	test set
MEKFNNDFNLDVTVSKDDAKKADVKITSKSLCTPGCVTGLLMGCAGSSATCNCSVHVG	LANTHIPEPTIDE	58	training set
VTVQTEWSQTTVTTPAAEVATGSEFDLDITLVEVVDPAHLINMTDDGCGHTCEKSTCISAA	LANTHIPEPTIDE	61	training set
MTRNTVVPSSTQASSQQAQGTTDGFDLDVSLVEVADPAGLVNLTDDNCGSTCGACTTNVA	LANTHIPEPTIDE	60	training set
MTNYAGPSFEELEQEEMELVQGSGDVQAETTPVCFTVGLGVGSLVSASVC	LANTHIPEPTIDE	50	discard
MSRNQVMEELKMNHPAGATMVEVSEEELTRVYGGGDVQPETSPACLYTGGVVIGVTLSIWKC	LANTHIPEPTIDE	62	training set
IIGAGKNGVFKTISHECHLNTWAFLATCCS	LANTHIPEPTIDE	30	training set
MSIEEIVKAWKADESALDSALPANPIGEELSDEDLQDVTGGIYCSIGWSCDWQDTCDVEITYPY	LANTHIPEPTIDE	64	test set
MAKFDDFDLDVVKVSKQLPEAELAVTSKSLCTPGCKTGILQTCAIKSATCGCSIHIGK	LANTHIPEPTIDE	58	training set
VSNEDFNLDLVSVSKNSNSGASPRITSKSLCTPGCKTGALMTCPIKTATCGCHFGN	LANTHIPEPTIDE	56	training set
MNHDVSSFSGGIGGEFDLDMKIVESGPVAAALLGNTDDGCDTRRDGDC	LANTHIPEPTIDE	48	training set
MEKFNNDFNLDVTVSKDDTKKADVKITSKSLCTPGCVTGVLMGCNNKTATCNCSVHVG	LANTHIPEPTIDE	58	training set
MDNENEYELNLRLVDAGPVSGHATSTDDNCGSGDTASDACSGGSGR	LANTHIPEPTIDE	46	test set
VTPRVTDQRVRTVSASAAQDPFDLNISVIESGGTVASDGGCGSTCGNACISSGS	LANTHIPEPTIDE	54	discard
MHMNHKLMKNPVAKNKLKVLDESPAGDLLEEIQEQELQSNGYGGISPSVVATISVVSAVSIAGTSVVSASATNPGRYCTWSAECSWSQKRCD	LANTHIPEPTIDE	92	training set
MQTTDLAKAWKDPGFSATLTAEQLSTLPANPVGDLADIADFANEGEVQPIMMSWAPCWITWSSDTNCCAY	LANTHIPEPTIDE	70	training set
MLDQTAVLDSDAFDIDAEFTVETEMASPAITSVVVCTPGCGPSVGTFCTACCC	LANTHIPEPTIDE	53	training set
MAKLKNDFDLDLTVSKDNTKSADVQFKSISLCTPGCPTGILMGCHKCPSGSDTVYTK	LANTHIPEPTIDE	57	training set
MTPSTAVLAPAPVSSEPDPFDVDLDLRVIEAAGPLVITMCSTDDNCGSTCKPSACASNSADPF	LANTHIPEPTIDE	63	training set
MFSQKSYLLKNPVAKNKFGASMTNPSGDIITEIQEQELEAVNGGITPTVGWSAVAVSTLTVNSVLVVSVSATNPGRVCTISAECSSGYKRCD	LANTHIPEPTIDE	92	training set
MSYWSGHMLWTRQERITAMNIEEIVKAWKSEEETADVNMPANPVGEELSDEELQEVSGGFPCPIISKCLTNWTGNL	LANTHIPEPTIDE	76	training set
MSIVQEVGPSSVMPDEWFDLPITIVNDDSCVASDGCDTSDGCSSTCPSACASS	LANTHIPEPTIDE	53	test set
MNANTIKAQAQSPAATAEGDAFDLDISVLESGDGSATVINLTDDGCKPSCKGSCATNVA	LANTHIPEPTIDE	59	training set
MNTENKNEVTWLDEVSAQEFDEEVYGACSTNTFSLSDYMGNNGNWCTISHECMAWCK	LANTHIPEPTIDE	57	training set
MAQQIQHATTGASEFSLDLRVVEAGAPIASLLRDTDDGCGSTCSNGATACTSLSGDAA	LANTHIPEPTIDE	58	training set
RVSDLPEQAAQFGEGTFTSPSSYAIGTRCPICC	LANTHIPEPTIDE	33	training set
DPRTTPSPFLASFVASYIASAEFKCGKDNKGK	LANTHIPEPTIDE	32	training set
MNIEEIIKAWKSEEQALDDGMPENPVGRELSEQQLQEVTGGMVCARTCDEDWTCSVFCYFVGNTGAI	LANTHIPEPTIDE	67	training set
MIHTALLDPMEVDGEEDFAPLDVKVVVAAHPHGKLLCATNDGCGNTCANGASACTSFTEDPA	LANTHIPEPTIDE	62	discard
MSNLNENVVGLSMKKLNKTEMEKIYGASGVDTRTHPTVVVASRITVQASKASSKACLSAAGSITGLVSYNKNCLG	LANTHIPEPTIDE	75	training set
MPGMSIEDIVKAWKSGETLENDSLVNPAGEELSDEELREITGGMLCGYTCYWGCHGNTTCDESVLV	LANTHIPEPTIDE	66	training set
MAPQGSTTFKAATDFSAGPGSDFDLDIETIASAPVVAGLLNDTSDGCTATCQSACSNSTCISG	LANTHIPEPTIDE	63	training set
MAKEPNYEKIFKAWKDPAFRASLSPEEQGELPETPAGFLDLSEEEQDGLVGGTTVVIVCTTVPSLCARGTLCGTCAVFTSGCC	LANTHIPEPTIDE	83	test set
VILVNQAWKNPYARAHNAALPIENPIAELNEDELLKVSGAATGGGAGTVITAPSTPGWAETILTSVVCAAASYFLGNGGHVCTLTVECQKSCSTK	LANTHIPEPTIDE	95	training set
MALLDLQTLESDEHDGGGASTVSLLSCVSAASILLCL	LANTHIPEPTIDE	37	training set
MALLDLQSMESDELSHGGGGGGSNVSLLLCWSTASVALCL	LANTHIPEPTIDE	40	training set
MALLDLQGMELPAAERTGGGSRASLLLCGDSSLSVTTCN	LANTHIPEPTIDE	39	training set
MALLDLQAMDAPEHGGGGGGSEASLLLCWSDASIVLCL	LANTHIPEPTIDE	38	training set
MTILDLQGMETSHHGKPRRSGASKYCGGASRLSVLLC	LANTHIPEPTIDE	37	discard
MSYNKQMSKVLELQEMKKTTGQGGLTSNLSLVCKEKSTISVFTCLPGQQY	LANTHIPEPTIDE	50	training set
MALLDLQTLESETDAHDGASTVSLLSCVSAASVLLCL	LANTHIPEPTIDE	37	training set
MDFILDLQDLETPEAQSNAMATGGSSGGGGGSTTASNASLLLPCSHSTVSLILC	LANTHIPEPTIDE	54	training set
MSLLDLQEMELPTDSAEETVLGSGKSQHCSDASWVFC	LANTHIPEPTIDE	37	training set
MVLLDLQSLEAPTGGGGHGGGGGGGSTLTVLGCASVTPSNLSLILCH	LANTHIPEPTIDE	47	training set
MALLDLQGMTVENGGGDDSSVSLLLCDKHSSHSTILCL	LANTHIPEPTIDE	38	training set
MALLDLQAMETPADEAFGELATGSQVSLLICEHSSLSLTLCTP	LANTHIPEPTIDE	43	training set
MVLLDLQALETPGGGGHGGGGGGGGSTLTVLGCASVTPSNLSLILCH	LANTHIPEPTIDE	47	training set
MALLDLQDMEPIEHGHGGGEPASSLSLLSCVSSVSLLICL	LANTHIPEPTIDE	40	test set
MEHVLELQALEAPESQGLDHHGHSHCSTECGESTLSLLLCA	LANTHIPEPTIDE	41	training set
MVLLDLQSLETPGGGGHGGGGGGGGSTLTVLGCASVTPSNLSLILCH	LANTHIPEPTIDE	47	training set
MAVAPSPSVVSRAAGDPAPPLSAADVWGEGFELNVRLVAEAVPPDGLVPCDTSDGCGQTCESACANSNG	LANTHIPEPTIDE	69	training set
MAILDLQTLELPETEAAPIDDTLASVSSLSALNCGTSTVSTLLCL	LANTHIPEPTIDE	45	discard
MTLLDLQKMDVPETTGGGGGGGGDESSLSLLLCDKHSSHSNLLCL	LANTHIPEPTIDE	45	training set
VQNTQDNTRSESPFALDIRLLENSDSLAQLINLTDDGCGSSCPSACTTSASD	LANTHIPEPTIDE	52	training set
FDDFDLDVVKVSKQDSKITPQWKSESVCTPGCVTGLLQTCFLQTITCNCKISK	LANTHIPEPTIDE	53	training set
MELVLELQALEAPEALDGHGGGGGGAPSNLSLLASCTNSTLSLLTCH	LANTHIPEPTIDE	47	training set
MPVQEDEVDEVDGMRFSSASLGWCKNWSVISSFGC	LANTHIPEPTIDE	35	training set
MEARMQSAPRTEQPQVSSATPFALDIRLIEQSDTAPLINLTDDGCGSSCPSACTTSTSD	LANTHIPEPTIDE	59	test set
MSLLELQGLTIETETGHAPPPGSRASKGCGGSRLSLLLC	LANTHIPEPTIDE	39	test set
MTLLDLQTLETSEDKGTVAGGGSEASLLLCGDSSLSVTTCR	LANTHIPEPTIDE	41	training set
MNTDATAAPEGFDLDIRLIETSDEAESLINLTEDNCGSSCPNACTGSYVD	LANTHIPEPTIDE	50	training set
MGFILDMQDLETPEAPSNAMASGHGGGGGGGGSTTASNASLLLPCSHSTVSLLAC	LANTHIPEPTIDE	55	test set
MTTAVLDSVTAPIGLPAGDLTDEEFQLEVRVVVAESPVYNFDCPTSDGCGNTCANGASSCVSTIEDAA	LANTHIPEPTIDE	68	training set
VTQQMLEALHNPKVRAKLSQEELAAMPANPAGQVEFVDFEMEDLLGGLFPGSSSFYLGECCFTPGDGD	LANTHIPEPTIDE	68	training set
MESTFLEKDVEEQVTWFEEVSDQEFDDDVFGACSTNTFSLSDYWGNNGNWCTASHECMSWCK	LANTHIPEPTIDE	62	training set
MSLHKIVRAWEDPEYRDSLSAAELADLPENPAGIIELTDAELGQVLGGAQSGNSVGCNTKTCVVSRGNSRNPCGSNC	LANTHIPEPTIDE	77	training set
MFNKDLKEVVPSFDSLTTEEMEALIGEGDIQAETTPACAAAAASSGACAAGAGGFIVGATAIFSVKQC	LANTHIPEPTIDE	68	training set
MTRSTVVASRTEVRPRIPGTSDGFDLDVSLVEIADSAGLVNLTDDNCGSTCGACTTNVA	LANTHIPEPTIDE	59	training set
MFNKDLKEIVPSFDSLTTEEMEALIGEGDIQAETTPVCAAAAASSGTCASFITGAASGVAFSIKEC	LANTHIPEPTIDE	66	training set
MSEKAFTEEIVGKSLHSLTQEEMHSFYGDFDDNAEVRASPVASAVVKETVKQGAKASSAKCAGVISLSGIGGAASSANDCLG	LANTHIPEPTIDE	82	training set
MSDFFKQRKNLTSNTAEKLDEAILEEVEDQSSMGGFNTWNLTPTSTVGIAASVGLGNKGKVCTYTVECVNNCS	LANTHIPEPTIDE	73	training set
MKNNDMKNILVEIEEHQEMAGFNTWNTISTSTCIAVSHFIGNDGKLCTYTVECVNNCR	LANTHIPEPTIDE	58	training set
LRKNLERNPYLRNENQESVDLPLDNPIRELKEDELLKLNGAKSRFKPGAEIAVSTIGCYAGSVYLGNDGFMCTTTVECQNQCK	LANTHIPEPTIDE	83	training set
MKELLKNPVLQNKYSMKEKNPAGDLLQEVNEQEMQEVNGGVLGPAESRAIARKMGLGNNYGSMCTVSAECMFTISCGS	LANTHIPEPTIDE	78	training set
MKKEDYKGIGLVDEKELKKMAGAGEVTPRTTIPCGAAVITAGGVIGGGVKYTLQDSANSCPTGQCTSKC	LANTHIPEPTIDE	69	training set
MKELLKNPVLQNKYSMKEKNPAGDLIQEVNEQEMQEVNGGIGPAESRSQARRMGLGDDYGSLCTISAECLFTISCGS	LANTHIPEPTIDE	77	training set
MTKTEIINAWKNPEARANISFSHPAGLSYGELSTEEMMNIQGAGDVQPETTPTTTIASSGFCAVTTIGVGVTLSLQFC	LANTHIPEPTIDE	78	training set
MTLLDLQSMETPKEENTEAAHLHGGGSRASLLLCGDSSLSVTTCN	LANTHIPEPTIDE	45	training set
MSILSLQALETPEETTEYQSVLSSLSAVNCTNSTVSTLLCL	LANTHIPEPTIDE	41	discard
MALLDLQTMESDEHTGGGGNSTVSLLSCVSAASVLLCL	LANTHIPEPTIDE	38	training set
MSYHKQMSKVLELQGMTKTAAQGGLTSNLSFICKEKSTISVFTCLPGQQ	LANTHIPEPTIDE	49	training set
MALLDLQAMETPAEDSFGELATGSQVSLLVCEYSSLSVTLCTP	LANTHIPEPTIDE	43	training set
MSHENIIRAWKDENYRQSLTPEEQSLLPANPAGMLELTDTQLENAAGGRKFTYGGDESCNSGIIACTLPLICGVEK	LANTHIPEPTIDE	76	training set
MSNENIIRAWKDREFRNSLSKQESELLPTHPAGLVELIDEDLGAAAGGIRAEDTHYMSKCIVCC	LANTHIPEPTIDE	64	training set
SGGVFCTVSHECHYNSVSPSSWLTCC	LANTHIPEPTIDE	26	training set
MSPRIEPSTKASQPSAATPDGFDLDVTLVEVADVAGLINLTDDGCGETCGACTTNVA	LANTHIPEPTIDE	57	training set
MSVQIAESAAPPIGPTTAFSGEDAPPIGPSAAILPFSGEDWELEVSVTDAPRPVASDDCDTSDGCESSCASSCTSD	LANTHIPEPTIDE	76	training set
VSVPNSQPDSSSRVWRGGRGGPSGAGHTAAAHRTEPAVQQHTESKRSTTSTRRIPVTPRVTDQRAGTVSASAAQDPFDLNISVIESGGTVGASIASDGGCGSTCGNACISSGS	LANTHIPEPTIDE	113	training set
DPRTTPSPLLASFVASYIASAEFRCGKDNKGK	LANTHIPEPTIDE	32	training set
MTEKFYAAAGDVEQELEDISLKSINGGADVETRGLSQGNDGDYCTITWECGMCPTHTCWC	LANTHIPEPTIDE	60	training set
MNSLLTVSNDPFELDVQIVTDGPVAAALLADTDDGCDTVKGSDC	LANTHIPEPTIDE	44	training set
VVALLDGLDITVVHDGPATASRKCSTDNGCDTLAGSDC	LANTHIPEPTIDE	38	training set
KIYGASGVDTRTHPTVVVVSRASSKFCVTVAASALLSYNMNKC	LANTHIPEPTIDE	43	training set
RVSDLPEQAESFGQGTFTSPSSYAIGTRCPICC	LANTHIPEPTIDE	33	training set
MTAVHLEQPVAPAQPTADVVDKADDPFQLDITFIENTPATETVLMCSTGDNCGSSCPSACTTS	LANTHIPEPTIDE	63	training set
RVSDLPEQAASFGEGTFTSPSSYAIGTRCPICC	LANTHIPEPTIDE	33	training set
GASGVDTRTHPTVIAISRTSSKACLSGVSAISGLLSYNKDCIG	LANTHIPEPTIDE	43	training set
MGLKAPAQAQNGANLFDLDLEIGVEKSVAGPAITSISFCTPGCTSDGGGSGCSHCC	LANTHIPEPTIDE	56	training set
VDTDEEFVLDVTLVDAGPGASGYATSTDDGCGSGNTGSTACSGK	LANTHIPEPTIDE	44	training set
VNDTETSEFVLDVSLVDAGPTAGGYATATDDGCGSGNTGSNACTTKCDGGN	LANTHIPEPTIDE	51	training set
MDQVAESAVDSEFDLDVSIVESGPVLDELMRLTDDGCGHTCQSACPNSGC	LANTHIPEPTIDE	50	training set
MNETVVPEFTLDVTLVDAGPAANGYATGTDDNCGSGNTGSNACTTRCDAGN	LANTHIPEPTIDE	51	training set
MNRTKVIEELAANHPAGAKLVEVSKDELTRVYGGGDVQPETTPACILYINGITIGLALSKQSC	LANTHIPEPTIDE	63	training set
MRTEITVQSDTADLDLDLRIADVAEQTQEFGRGTYTSPSSYAIGTRCPVCC	LANTHIPEPTIDE	51	training set
VQNTQDSPSPESPFALDIRLLENSDSLAQLINLTDDGCGSSCPNACTTSAAD	LANTHIPEPTIDE	52	training set
MHPSTDDDFSLDLGVVVAMTPDGLMDCPTDDGCGNTCSGNDSSCNSFTDDPS	LANTHIPEPTIDE	52	training set
KLVEVSKDELSRIYGGGDVQPETTPLCAFGSGVALGISLSKVYC	LANTHIPEPTIDE	44	training set
LDEKQLDSLVGQKFEDLSKEEMNFIAGGNDNARISPTIILSAATVASAASSFVGSYTLSAFTKCR	LANTHIPEPTIDE	65	training set
VTDQGMRTASASAAQDPFDLDISVIESGGTVGASLASDGGCGSTCGGNACISSGS	LANTHIPEPTIDE	55	discard
MDTTEQDYQLDVRLVDAGPAASGHATSTDDGCGSGNTGSNACTGGGN	LANTHIPEPTIDE	47	training set
MASGTLELSATGSDDEFDLDVSLLEVADVAGLVNLTDDGCGSTCTACTTNVA	LANTHIPEPTIDE	52	training set
MTRNTVIPSLTQVRPQAAEASDGFDLDVSLVEIADPAGLVNLTDDNCGTTCGACTTNVA	LANTHIPEPTIDE	59	training set
MSTQTHVGSTDVLLADPDDDTDSTAAGDPFDFDINFIEGVDASETVLMCSTSDNCGSSCGSACTTS	LANTHIPEPTIDE	66	training set
MSMAPPTAVLDAPPIDTEVVTDDDFVLDMRVVEATTPLVTMACSTSDGCGSSCGTSACATSSYDPA	LANTHIPEPTIDE	66	training set
ELVEAWKDPQVREKLKDLPKHPSGKALNELSEEELAEIQGASDVQPETTPLCVGVIIGLTTSIKICK	LANTHIPEPTIDE	67	training set
MGKMSEKMYELAGDLSKELEEISIQSINGGSDVDVRGIGISSGNDGGVCTLTWECGKCPTVTCWSWSC	LANTHIPEPTIDE	68	training set
MQNDDFDLDISVLESDDGSATLINLTDDGCGSTCSSPCATNVA	LANTHIPEPTIDE	43	training set
MKKEDLFDLDVQVKEASQAQGDSVVSDLICTTFCSATFCQSNCC	LANTHIPEPTIDE	44	training set
MDNPEYELNLRLVDAGPLASGHATSTDDECGSGNTESQACTTTSD	LANTHIPEPTIDE	45	training set
MSTQTIARSAEPRQHVGDDADDPFQLDITFIENTPATETVLLCSTGDNCGSSCPSACTTS	LANTHIPEPTIDE	60	training set
MSKGYKFTKEELVEAWENPQVREKLKDLPNHPSGKALNELSEEELAEIQGASDVQPETTPCRLGIFLF	LANTHIPEPTIDE	68	training set
MQTTDLAKAWKDPGFSATLTAEQLSTLPANPAGDLADIADFANEGEVQPIMMSWAPCWITWSSDTNCCAY	LANTHIPEPTIDE	70	training set
VTDQGMRTASASASQDPFDLDISVIESGGTVGASIASDGGCGATCGGNACISSGS	LANTHIPEPTIDE	55	discard
MNKDFDLDLKMDKGSVDVGESKIASVAYCTPGCLTGSTCGTSECGLTRNCTNTWLCY	LANTHIPEPTIDE	57	training set
VTSWSLCTPGCTSPGGGSNCSFCC	LANTHIPEPTIDE	24	training set
MAPPTAVLDAPTVDAEAVTDDDFVLDMRVIESATPLVVMACSTSDGCGQTCSTSACSTSSYDPA	LANTHIPEPTIDE	64	training set
ELVEAWKDPQVREKLKDLPNHPSGKALNELSEEELAEIQGASDVQPETTPLCVGVIIGLTTSIKICK	LANTHIPEPTIDE	67	training set
IADVAADSPAPEDFDLDIRFAESGPVVEELMRPTDDGCGSTCESACTPTCP	LANTHIPEPTIDE	51	training set
MNETVDSEFTLDVSLVDAGPAANGYATGTNDGCGSGNTGSNACTTKCDAGS	LANTHIPEPTIDE	51	training set
ELVEAWKDPQVREKLKDLPNHPSGKALNELSEEELAEIQGASDVKPETTPLCVGVIIGITASIKICK	LANTHIPEPTIDE	67	training set
MSQQDIIRAWKNREYRESLSEEQRSQLPENPAGIADLSDEVLETIAGGMMARDGGGGGTGCGTGGNCSRCNPCSAPK	LANTHIPEPTIDE	77	training set
MTRTITKGTTQVQDPTAGGQSDGFELNVSLLEVSDAAALTVLTDDNCGSSCGACVTFTD	LANTHIPEPTIDE	59	training set
MTRSTVVPSSTYATQQAPGTSDGFDLDVSLVEVADPAGLVNLTDDNCGTTCGACTTNVA	LANTHIPEPTIDE	59	training set
MTAAPTVLEPPAQWTGPLDSAAFELDITVIEQADLGGLVRLTDDGCGSTCTACTTG	LANTHIPEPTIDE	56	training set
LPIDLFTQLPPADETIDDVFDLDVEVTVETTTSAIYHSGLICTPTCISPNGGSFCSFCC	LANTHIPEPTIDE	59	training set
VEDEFELDITVLESGDRSAKLINLTDDGCGSTCSSPCASSVA	LANTHIPEPTIDE	42	test set
MNREHALRFLETQSPVGETLVELSQEELMRVHGGADVQPETTPLCGFLVGVGIGVILSVTSC	LANTHIPEPTIDE	62	training set
MNEKMYRFAGDLREELEEISLSEFSGGGGAEQRGISQGNDGKLCTLTWECGLCPTHTCWC	LANTHIPEPTIDE	60	training set
MPKAGTSYAAEATSDFDLNIEVLASAPVVPGLLNDTGDGCTATCQSACSNSTCG	LANTHIPEPTIDE	54	training set
MSTPTALESSSTEPDSDFDLDVTVVAAAPVADLKSPTEDNCGRTCESACPATGC	LANTHIPEPTIDE	54	training set
MENLLAVSGEPFQLDVEIVTEGPVAAALLGDTDDGCDTVRGGDC	LANTHIPEPTIDE	44	training set
METEKYLQVVEDEEIEQLVGGAGPGWVETLTKDCPWNVPVACVTILGQRICKKCY	LANTHIPEPTIDE	55	training set
MKTEFSKLQKEVKQEQVTWFEEVVDQEFDDDVFGACTTNTFSLSDYWGNKGGWCTVSKECMAWC	LANTHIPEPTIDE	64	training set
MKNFSKNPVLQNKYSMAEKHPAGNLLEEINEQEMNNVNGGYNLSAAIAHAAGLKGNYGKMCTYSAECMGTISCGS	LANTHIPEPTIDE	75	training set
MEWSPTTVATPAAGVEMGSEFDLDITLVEVVDPAHLINMTDDGCGTTCEKSTCISAA	LANTHIPEPTIDE	57	discard
MTRNTVVPNSTQVSRQAPRTPDGFDLDVSLVEVADPAGLVNLTDDNCGSTCGACTTNVA	LANTHIPEPTIDE	59	training set
MNDTETSEFVLDVSLVDAGPTAGGYATATDDGCGSGNTGSNACTTKCDGGN	LANTHIPEPTIDE	51	training set
MTRSTVVPSNTQVNGRTPRPSDGFDLDVSLVEVADPAGLVNLTDDNCGSTCGACTTNVA	LANTHIPEPTIDE	59	training set
ITQVDVVRAWKDASYRNQLSAEQLATLPANPIEDAREGLDAMLMGAGTKSQAQQANSSGLICTWSGECMGGQSCNPFVNIFN	LANTHIPEPTIDE	82	training set
MAPLLELERTDAATATTEDDFVLDMRVVESTTPLVIMMCSTSDGCGSSCSTSACATKSSDPV	LANTHIPEPTIDE	62	training set
MENNFKNPVLRSKKLNEKHPAGNLLEEINEQDMSSIAGGTTDAYSKSLANRAGLGNNYGQYCTVSAECFGTISCGS	LANTHIPEPTIDE	76	training set
VQWKNQMENLNAATYNPVGSVLSELTDTEMDTVAGGAQALGFTDGNCLATITADCTPWIWGC	LANTHIPEPTIDE	62	training set
MTVQMEHPVTPAQSAAEQQDLTDFDLDITIVEGGPAADQLIRLTNDGCNSTCATACVSCP	LANTHIPEPTIDE	60	training set
MPKAGTSYAADATSDFDLNIEVLADALVVPGLLNDTGDGCTATCQSACSNSTCG	LANTHIPEPTIDE	54	training set
MSAEELVRAWRDEDFRLELESAVAHPAGEVDRELYVSTGAASTCNYASVTCAHICSCAA	LANTHIPEPTIDE	59	training set
ISVLESGDGQATLINLTDDGCGSTCSSPCATNVA	LANTHIPEPTIDE	34	training set
MKNTTNEMLELIQEVSLDELDQVIGGMGKGTVGTISHECRYNSWAFLATCCS	LANTHIPEPTIDE	52	training set
MSNFDIIRAWKDEDYRNSLSDEQRSQLPQNPAGMVELTNTSMETVVGGNQQLATGGTVGLKKQTITVSIDVCCSTGDLPCNGKTQDLLCIVY	LANTHIPEPTIDE	92	training set
MEFDEFDLDISVVESGGTAVASVASDGGCGSTCTGSCVSSSS	LANTHIPEPTIDE	42	training set
LAGLDDDFAPLDVKVVIAEHAYGKLMCSTGDGCGTTCATGASACGSFTEDPA	LANTHIPEPTIDE	52	training set
MKNLNLLEEVTEEELDTILGAGNGAIRTISHECHMNTWQFLFTCCS	LANTHIPEPTIDE	46	training set
MKNQFDLDLQVAKKEVAPKEVQPASGLICTPSCATGTLNCQVSLTFCKTC	LANTHIPEPTIDE	50	training set
MEVPMESLATSAHSAGVLMSSGEPADWELDVSIVEGGPAADQLIRLTGDGCNSTCATACVSCP	LANTHIPEPTIDE	63	training set
MSHEDIDIVRAWKDEEYRNSLSEEQRAQLPENPAGTGELSDETMETVAGGHANTEKKVLGVCIKTVGAGDPCTNVTGELLVDLC	LANTHIPEPTIDE	84	training set
MSHSDKKHILRAWRDADYYDSLTDAERAALPDSPASVMELDDATLAFITGGDTEATCPSNPTPTQRSCLFTPCGTSHCCA	LANTHIPEPTIDE	80	training set
MSLLDLQTMETPKAEATEELHTGSRASLLLCGDSSLSVTTCN	LANTHIPEPTIDE	42	training set
MVLLDLQSLEAPTGGGGHGGGGGGGSTLTVLGCASVTPSNLSLVLCH	LANTHIPEPTIDE	47	training set
MVLLDLQALETPGGGGHGGGGGGGGSTLTVLGCASVTPSNLSLLLCH	LANTHIPEPTIDE	47	training set
MALLDLQTMETPKSEATGELATGGSRASLLLCGDSSLSVTTCN	LANTHIPEPTIDE	43	training set
MVLLDLQTLEAPGGGHGGGGGGGGGSTLTVLGCASVTPSNLSLILCH	LANTHIPEPTIDE	47	training set
MGFILDMQDLETPEAPANVLAGGGSGGGGGGSTTASNASLLLPCSHSTVSLLAC	LANTHIPEPTIDE	54	discard
MSLLELQGLTIESETGLKPPPGSRASKGCFLGGGSLFSLLFC	LANTHIPEPTIDE	42	training set
MVLLDLQSLETPGGGHGGGGGGGGSTLTVLGCASVTPSNLSLVLCH	LANTHIPEPTIDE	46	training set
MEFVLGLQDMTVTEQPDGPEVTGDPHSHYSGYGCGYSGLSLLLCEA	LANTHIPEPTIDE	46	training set
MVKGGSKMAKKKMDEKDVQKVLEVAGISGKDFADLSDEEMAQLAGAEGGDVDPEVTPTVVIGTITSAIGSAVVSYVASAEAKC	LANTHIPEPTIDE	83	training set
MALLDLQSMESDELTGGGHGGGGSVASLLLCWSDASIVLCL	LANTHIPEPTIDE	41	training set
MSEISTNKIVGEPFEELTIAEMVQVQGSGDVQVETTPACAFTASILVSYGVVKTIKGHC	LANTHIPEPTIDE	59	training set
MHMNHNLMKNPVAKNKLRVLDESPAGDLLEEIQEQELQNEGFGGISPVVSAAVSAVSAISIAGTSIVSASATNPGRYCTWSAECSWSQKRCD	LANTHIPEPTIDE	92	training set
MSEISTNKIVGEPFEELTIAEMVQVQGSGDVQVETTPACLYSVYVTANVSSVWCAGATVGAVISIVKC	LANTHIPEPTIDE	68	training set
MFSQKSYLLKNPVAKNKFGASMTNPSGDIITEIQEQELESVNGGITPTVGWSAVVVSTTIVNSALVVSVSATNYGRVCTVSAECSSGYKRCD	LANTHIPEPTIDE	92	training set
MKTKFQAESYADGKVSADETVQDAIDPAGAMLDIEDEALASVAGGCGCPGGATSALCSPCPPRDCF	LANTHIPEPTIDE	66	training set
MTLLDLQSMETPKEETTELHGGGGGGSRASLLLCGDSSLSITTCN	LANTHIPEPTIDE	45	training set
MIKSNLLKDPVLKKKLAINLDNPIGDIGEEIQEQDVNGHVGGLSPAIVSAAAGVLSLVSAATGGVIKAASSKAQNPGRYCTISAECFAGERCD	LANTHIPEPTIDE	93	training set
MALLDLQTLESDEYTHNGASTASLLSCVSAASVLLCL	LANTHIPEPTIDE	37	training set
MKTKFQAESYTDGKVSADETVQDAVNPAGAMLDIDDDALASVAGGCGCPPGSGSAMCSPCPPLQCY	LANTHIPEPTIDE	66	training set
MKAEEFVEELSESELEEISGAKKKPGCGYLCTFTKDCPTSWFGCC	LANTHIPEPTIDE	45	training set
MYEGDVALLEEIDEQDFEGVAYGACTTNTFSLSNVLGNNGGWCTLTRECQRSCN	LANTHIPEPTIDE	54	training set
MTTTILRYAAADADFRSELLERPADFGVTSVPAGVEQPDAEALGYWTEGVAAVDIYACASTCSSGPFTFVCDGTTKG	LANTHIPEPTIDE	77	training set
MSINEKSIVGESFEDLSASDMAMLTGRNDDGVAPASLSFAVSVLSVSFSACSATVVTRLASCGNCK	LANTHIPEPTIDE	66	training set
MERGERNMSKNSMINAWKNPMHRLADIENPAGNAIVELNDLELDDLTGAASSGNICTATTECTYWSAICC	LANTHIPEPTIDE	70	test set
MTLLDLQTMETPKAEATEELHTGSRASLLLCGDSSLSITTCN	LANTHIPEPTIDE	42	training set
MELVLDLQALETPEVLEGGGGGSHGGASNLSLLASCANSTISLLTCH	LANTHIPEPTIDE	47	discard
MVLLDLQGLEAPAASDVASGGSTLTALTCHSGHPSNLSVALCH	LANTHIPEPTIDE	43	training set
MNLFDLQSMETPKDEAMGDVETGGSRASLLLCGDSSLSVTTCN	LANTHIPEPTIDE	43	training set
MALLDLQGMTSENGGGGNSSLSVLCGHSSHSQTICL	LANTHIPEPTIDE	36	training set
MALLDLQTMETEQHTGGGSTLSLLLCASQASISLCL	LANTHIPEPTIDE	36	training set
MALLDLQTLESEEHTHTGASTVSLLSCVSAASILLCL	LANTHIPEPTIDE	37	test set
MSILSLQALETPEETTEYMSVISSLSAVNCTNSTVSTLLCL	LANTHIPEPTIDE	41	discard
MGFILDMQELETPEAPSNAMASGHGGGGSTTASSASLLLPCSHSSASLVLC	LANTHIPEPTIDE	51	training set
MELVLDLQAMETPEVLEGGGGGSHGGASNLSLLASCANSTISLLTCH	LANTHIPEPTIDE	47	discard
MSFVLNLQALDAPAAETEQDKAISYLSLLLCFTGVHSDS	LANTHIPEPTIDE	39	training set
MSHSTMEPLSSAGQTAAEDPFDLDIRVLEFSDAAASLINLTDDGCGSSCPNACATNVG	LANTHIPEPTIDE	58	training set
MAQLATIQPDVEGGTLDDFDLDIEFIEAGGTVEHIIKMTEDNCGGTCASACTSC	LANTHIPEPTIDE	54	training set
VDFSSKTPALRGSLPTNANFAFSGMRTGTICDRKGKGVISVTAALMEAPQVFELDVQVETDRVRPEAMACQTDDGCGSTCEISACHSQK	LANTHIPEPTIDE	89	training set
MPDIHTSAGALALAEPPEAEVLIDDEEFTLNVRVVVATYSNGNNQCSTNDGCGQTCENGASACNSSIDDPDHNH	LANTHIPEPTIDE	74	training set
MSKNEKLSKLRNQEFDTKELIGAINEEELKKMAGAGDMNPETIPATPTPILVNLTKELCPSIPCTSRCL	LANTHIPEPTIDE	69	training set
MSVADITQAPTSSEDDFVLDVRVIEDDALRPAAQKACDTSNGCPPSCASSCNSAA	LANTHIPEPTIDE	55	training set
MSKNEKLNKLRNQEFDTKELIGLIDENELKKIAGAGDVNPETTPTTHIVTAPNFTVLCPTPTCTSRCK	LANTHIPEPTIDE	68	training set
GEGDVTPEGLSSWLGNKGGYCTLTKECMSSCN	LANTHIPEPTIDE	32	training set
VKELKKNIESEKVLKKLTEVPDLTGGTSTTVPCGIGSTITISIAYCPTSKCTERCGTRG	LANTHIPEPTIDE	59	training set
MEHDELYDLNVRLVDSGDIASGHATSTDDDCGSGNTGSDACTTNADVGGVR	LANTHIPEPTIDE	51	training set
VSVQQIEDAALAPHPQNAGEEESFEDWDLDVSIVESGPSADRLIRMTDDGCGVTCESACSTTCP	LANTHIPEPTIDE	64	training set
MNSTEDFDLDVSFADRGTVIGELLNSTSDGCGSTGASACAGCVTD	LANTHIPEPTIDE	45	training set
ISKEVQLAQVTWLEEVVDQEFDDDVFGACTTNTFSLSDYWGNDGSWCTATHECLSWCK	LANTHIPEPTIDE	58	training set
MFKLKKENISELAKESYLNQLDKNNTRLENSFGADCSWWNVSCHLGNDGKYCTASKECMPTCND	LANTHIPEPTIDE	64	training set
VNETDASEFALDVSLVDAGPTAGGYATATDDGCGSGNTGSNACTTKCDGGN	LANTHIPEPTIDE	51	training set
MTRNTVIPSLTQIRPQVPQASDGFDLDVSLVEIADPAGLVNLTDDNCGTTCGACTTNVA	LANTHIPEPTIDE	59	training set
MSSNLGPVQGHPSGSPALGAAARRGPFDLDVSVVEAADAGSLISVTDDGCGTTCPKACTTGSR	LANTHIPEPTIDE	63	training set
MNIEATATQVDVEFTLDVRVIESGVPVRDLLRDTSDNCGSSCSGTACTSFVGDPA	LANTHIPEPTIDE	55	training set
MSKNEKLNKLRNQEFDTKELIGSVDENDLKKIAGAGDVNPETTPATPILTNPDFTKHLCPTPPCTTRCL	LANTHIPEPTIDE	69	training set
MTKELKALKNPYYRHQNNVNVNLPVENPLKELNEDEMSMFGGAAEPRTIGSFNSADYIKLSIGLGNNGYICTYTVECQKNCN	LANTHIPEPTIDE	82	training set
MANNVFDLDVEVKSVNSVHQNIGLFTSACFSSQCFSSKCFSDSCFSSNCFTGRHQCGYTHGGC	LANTHIPEPTIDE	63	training set
MTRSTVVPITTLVSHQTPAATDGFDLDVSLVEIADPAGLVNLTDDNCGSTCGACTTNVA	LANTHIPEPTIDE	59	training set
RVSDLPEQAESFGQGTYTSPSSYAIGTRCPICC	LANTHIPEPTIDE	33	training set
MSKNEKLNKLRNQEFDTKKLIGSVDENDLKKVAGAGDVNPETTPVINPGFTNRLCPTIPCTLRV	LANTHIPEPTIDE	64	training set
MENEKYLQVVEDEELEQLVGGIGPGYIETLTKDCPRVTPQICLPINGIWTCKRCY	LANTHIPEPTIDE	55	discard
MKELLKNPVLQNKYSMKEKNPAGDLLQEVNEQEMQEVNGGLGGAESRAIAKRMGLGDNYGTMCTVSAECMFTISCGN	LANTHIPEPTIDE	77	training set
MSVSTMTLESRVEETADSDLFDLDIRVVESSGQINSLISTTDGGCGSTCGSSCVSST	LANTHIPEPTIDE	57	training set
MHMNHNIMKNPVAKNKLNVLDESPAGDLLEEIQEQELQNNSFGGVTPTVVATISAVSAVSIAGTSVVSASATNPGRYCTYSAECSWSYKRCDK	LANTHIPEPTIDE	93	training set
GASGVDTRTHPTVIVVSRASSKACLSGVSAISGLLSYNKDCIG	LANTHIPEPTIDE	43	training set
MAEININNLDIDIIRAWKDEEYLNSLSEEQRSHLPENPAGIIELSNEDMGSVVGGGSIYCCGGIVSNIFTNPVAE	LANTHIPEPTIDE	75	training set
MTAIQAERPAAPAQADLVKTDDDPFGLDITFIEGTPATETALMCSTGDTCGSSCPSACTTS	LANTHIPEPTIDE	61	training set
MSTSTGEQSTAADGGDFDLDVSLLEVADVAGLINLTDDGCGSTCTACTTNVA	LANTHIPEPTIDE	52	training set
MFSQKSYLLKNPVAKNKFGASMNNPSGDIITEIQEQELEAVNGGITPTVGWSAVAVSTLTVNSVLVVSVSATNPGRVCTVSAECSSGYKRCD	LANTHIPEPTIDE	92	training set
MNNEMKSWKNPYFRNSQNHATNLPIEDPLMELAEEDIKSINGGVEPRGWGDVLTTLLCFVGSYTLGNDGIMCTTSYECQRKGSCA	LANTHIPEPTIDE	85	training set
GASGVDTRTHPTVIVVSRTSSKACLSGVSAISGLLSYNKDCIG	LANTHIPEPTIDE	43	training set
MNSLLAVSDDPFELDVQIVTEGPVAAALLADTDDGCDTVKGSDC	LANTHIPEPTIDE	44	training set
MEKAFDLDLEVVHTKAKDVEPDFTSVSFCTPGCGETGSFNSFCC	LANTHIPEPTIDE	44	training set
MTRSTVVPSSTHVSQQTPRTSDGFDLDVSLVEVADPAGLVNLTDDNCGTTCGACTTNVA	LANTHIPEPTIDE	59	training set
MTRIVTKSTTQVQESTAGGQSDGFDLNVSLLEVSDTAGLTVLTDDGCGSSCGACVTFTD	LANTHIPEPTIDE	59	training set
MTSATLAPPPVVAPSADLDDDFAPLDVKVVIAEHSYGHLMCSTGDGCGTTCATGASACGSFTEDPA	LANTHIPEPTIDE	66	training set
MVLVVIVTINNKLRRYFIMIKSSLLKDPVLKKKLAVNLDNPIGEIGEEILEQDVDGQVGGLSPAAISLAATALSVVSAAAGGVIKAASAKAQNPGRYCTVSAECFAGERC	LANTHIPEPTIDE	110	test set
MNNELKSWKNPYLRNSQNHATNLPIEDPLMELAEEDIKSINGGVEPRGWGDVLTTLLCFVGSYTLGNDGIMCTTSYECQRKGSCA	LANTHIPEPTIDE	85	training set
LEQSPVGKSLKSLPKEEMAAIFGGTGMDAEVRSTLLCGMGISFVASYLASAAFKCGKDNKN	LANTHIPEPTIDE	61	training set
MTAIQAERPTVPAQADLAKTDDDPFGLDITFIEGTPATETVLMCSTGDTCGSSCPSACTTS	LANTHIPEPTIDE	61	training set
MTATMLSPIMTATTGASAATATPEAPADPFDVDLTIVTEIGADLLPKACGTGDGCAASCASSCASAV	LANTHIPEPTIDE	67	training set
MTPHGSVGAVLERTDSAPESILDEFQLDVQVTVEAAAGYTIRACDTSDTCGSTCGSACISS	LANTHIPEPTIDE	61	training set
MTRSTVVPSSTQVSQQTPRTSDGFDLDVSLVEVADPAGLVNLTDDNCGSTCGACTTNVA	LANTHIPEPTIDE	59	training set
VEDEFELDITVLESGDRFAKLINLTDDGCGSTCSSPCASSVA	LANTHIPEPTIDE	42	discard
MKGGIEVSQDMFELDVQVLKSKGTVEPQITSVIGCTPGCNPTATLCTSCGFNCTYKAPCK	LANTHIPEPTIDE	60	training set
MPTTQIPDVPVAGVPDSVPDDWFDLPITIVDEDSCAQSESCDTSDGCSSTCPSACASS	LANTHIPEPTIDE	58	training set
MAPQSSTLKAATDFSGEGMSDFDLSIETVASAPIVPGLLNDTGDGCGSTCQSACSNSTCISG	LANTHIPEPTIDE	62	training set
IPTYQPPQPTTAVAEPLPAEEWELDTTVTRAPVPIVEACGTGDGCAKTCASSCASS	LANTHIPEPTIDE	56	training set
MTAIQAERPAAPAQADLVKTDDDPFGLDITFIEGTPATETVLMCSTGDTCGSSCPSACTTS	LANTHIPEPTIDE	61	training set
MEKNFELKALEAINDLTDAELENVVGAGNGQFNTISHECHWNTWQFMFTCCS	LANTHIPEPTIDE	52	training set
MSKNEKLNKLRDQEFDTKELIGSVDENELKKVAGAGDVNPETTPATPTIVTVTIEASINLCPTTKCTSRC	LANTHIPEPTIDE	70	training set
MTVQMERPLTPAQSVVTPKSSGETADWELDITIVEGGPAADQLIRLTGDGCNSTCATACTSCP	LANTHIPEPTIDE	63	training set
MTPAHSTAPAPLPLAGDYDLDVEIVDGGPVIPELLRSTSDNCGKTCSSACTSCKQN	LANTHIPEPTIDE	56	training set
MAENLFDLDVQVNKSQGSVEPQVLSIVACSSGKTAASCVETCGNRCFTNIGSLC	LANTHIPEPTIDE	54	training set
MTVQMEPPVAPAQPTAEQQDLTGFDLDITIVEGGPAADQLIRLTDDGCNSTCATACVSCP	LANTHIPEPTIDE	60	training set
MGDDEYTLDVRLVDSGDTGSGHATSTDDNCGSGNTGSNACTTNADIGGVR	LANTHIPEPTIDE	50	training set
MDLSTSSVVTAVVSGDTDDGFDLDVRIVEGGPGRLALLADTDDNCDTQKPGDC	LANTHIPEPTIDE	53	training set
VNETEASEFALDVSLVDAGPSAGGYATATDDGCGSGNTGSNACTTKCDGGN	LANTHIPEPTIDE	51	training set
MTVQLKQPVAPAQPIVVDVVDNDDPFELDITFIENTPATETVLMCSTGDNCGSSCPSACTTS	LANTHIPEPTIDE	62	training set
MSKNERLNKLRNQESDTRELIGSVDENELKKVAGAGDVNPETTPATTTIIAASFQLCPTTKCTSRC	LANTHIPEPTIDE	66	training set
MKFDIVRAWKDESYRESLSEEERALLPENPAGVELSESSLETVYGAHGGNSGGQQTYNLLAICNSLAVLAGAQCNNGSNG	LANTHIPEPTIDE	80	training set
VNDTDASEFALDVSLVDAGPTAGGYATATDDGCGSGNTGSNACTTRCDDGN	LANTHIPEPTIDE	51	training set
MNKELFDLDINKKMEASTEMTVQTWGTVVKVSKAICKTGTCIGTISCTNCK	LANTHIPEPTIDE	51	training set
MGGDPQSCSGPLSGNEFDLDMRLVEFGPVASVLLGNTDDGCDTDRNGDC	LANTHIPEPTIDE	49	test set
MTKQIATATTGLSGEFNLDVRVVEAGAPVASFLRSTDDGCGSTCSNGSTACASSVNDPS	LANTHIPEPTIDE	59	training set
MTQLATVQPDIVEGGTLDDFDLDIEFIEAGGTVEHIIKMTQDNCGTTCESACTSC	LANTHIPEPTIDE	55	training set
MEKTKILKTPELKVTKDLNLIDPCGDVLEEIKEHEVSGAFNTWNLTTTSVGTILVSEVFGNKGKVCTGTKECQGTC	LANTHIPEPTIDE	76	training set
MKFDIVRAWKDESYRESLSEEERALLPENPAGVELSESSLETVYGAHGGNSGGQQTFNALAICNSLVILAGAQCNNGSND	LANTHIPEPTIDE	80	training set
MTTQLAPAPTDVDGRPLDEFDLDITFIEAGGTVEHIIKMTQDNCGTTCESACTSC	LANTHIPEPTIDE	55	training set
MSDYEKYDLKVDLVDAGPAAGGHATSTSDECGSGNTGSDACSGGSGN	LANTHIPEPTIDE	47	training set
MNNITQQMNAEDGGASAGVFDLDVSLVEVADPAGLVNITNDGCGSTCGACTTGVH	LANTHIPEPTIDE	55	training set
MATNPNPGMTQAQPKARAKDPFHLDVELLEVGDAGALKTLTDDNCGSTCGACTTGVH	LANTHIPEPTIDE	57	training set
MTEERTAPLASPVAVDGKKDEFGPDDWELDITFVESGESVDKLIYMTNDGCGKTCQSACSTTCPA	LANTHIPEPTIDE	65	training set
MAQTITAETKATVAVGDEFDLDVRTVETADAASLQVLTDDGCGATCGACTTGVH	LANTHIPEPTIDE	54	training set
MAPQISTKPQTGTPFTADTGSDFDLNIETVSALPVVGALLNDTGDGCTSTCQSACSNSTCG	LANTHIPEPTIDE	61	training set
MKFDIVRAWKDESYRESLSEEERALLPENPAGVELSESSLETVYGAHGGNSGGQQTFNLLLACNSVAVLAGAQCNNGSNG	LANTHIPEPTIDE	80	training set
MTLGGSASAVLERTEATPLGLLDEFQLDVQVTVEAAPGYTIRACDTSDTCGSTCASACASD	LANTHIPEPTIDE	61	training set
MAQQSTSTILKAATDFRSDSDFDLDVTTVGAVPVLGSLLNDTSDNCTSTCASACSNSTCIGG	LANTHIPEPTIDE	62	training set
MNETVVPEFTLDVTLVDAGPAANGYATGTDDNCGSGNTGSNACTTRCDASD	LANTHIPEPTIDE	51	training set
MTEERTAPLASPVAVDGKKDEFGPDDWELDITFIESGESVDKLIYMTNDGCGKTCQSACSTTCPA	LANTHIPEPTIDE	65	training set
MAQQNTRTLPQTATPFTAESGSDFDLNIETVAALPVNGALLNDTGDGCGATCQSACSNSTCIG	LANTHIPEPTIDE	63	training set
MSTSTIDQPAELQQITDPGNETDPFGLDITFIENTPATETELLCSTGDNCGSSCPSACTTS	LANTHIPEPTIDE	61	training set
MNSSDSAILLHNPAGIVELDTDDMDLDMTHGGTTWWCAIATATIALTATKCSPDGTLCGSCQMGTRGCC	LANTHIPEPTIDE	69	training set
VKFDIVRAWKDESYRESLSEEERALLPENPAGVELSESSLETVYGAHGGSAGQQSYNAILICNTLAILAAAQCNNGSNQ	LANTHIPEPTIDE	79	training set
MAQLATVQPDVEGGTLDDFDLDIEFIEAGGTVEHIIKMTEDNCGSTCASACTSC	LANTHIPEPTIDE	54	training set
MNFSKRNPLLRNNMEEFNTIVGSLGEEIKEQNLEDINGGSTQLCASVKISAGVTLVVSKAVTWANDKVTAKYECGGVWSITAECQGC	LANTHIPEPTIDE	87	training set
MAKFNDFDLDLVQTPKQSNQIEPQWKSQSFCTPGCVTGVLQTCFIQTATCNCHISK	LANTHIPEPTIDE	56	training set
MTATMLTPIPPTTTEASDVTAVSDVPADPFDVDLTIVTEIDADLLPKACGTGDGCKPSCASSCASAV	LANTHIPEPTIDE	67	training set
VTDQGMRTASASAAQDPFDLDISVIETGGTVGASITSDGGCGSTCGGTACISSGS	LANTHIPEPTIDE	55	discard
MTAIQAERPTAPAQANLAQTDDDPFQLDITFIEGTPATETVLMCSTGDTCGSSCPSACTTS	LANTHIPEPTIDE	61	training set
MSTPTVEESKQNEGAANIGDPFGLDITFIENTPATETVLMCSTGDTCGSSCPSACTTS	LANTHIPEPTIDE	58	training set
MPNATLLPTAPPPLDEDDDFAPLDVTVVVSTKLNGVLMCDTGDGCGSTCSNGASACDSAAGDPA	LANTHIPEPTIDE	64	training set
MRLAQESQQDTQTHAPSSPFVLDIRLIETSDTTPLINLTDDGCGTTCPSTCVTSVSD	LANTHIPEPTIDE	57	training set
MTARSSGGVATLAPPMLDAEGWDADDWSADLDVSIVESGVAAEQLIRMTDDGCNSTCATACVSCGT	LANTHIPEPTIDE	66	training set
MNKHDVFDLDVQVKEANLVQPDSWLSEAVCTTFCTGTGNSFCC	LANTHIPEPTIDE	43	training set
VITALQDAPAGVFDLDVRIETEQVGVEDAACATDDGCGHTCELSACHSQR	LANTHIPEPTIDE	50	training set
MAPSLTLDAPETLNVGDVTADEEFELDMRVVEATTPLVIMMCDTSDGCGNSCSTSACATSSNDPA	LANTHIPEPTIDE	65	training set
MTTMLEPGTAPVTGDPFDLDIEVVPTRTTAQPGQVWNSGTNCHTDDGCGQTCESACSNSCTDGG	LANTHIPEPTIDE	64	training set
LDSTSDDVFALDVVLTDDAPQYGGKACTTNDGCDPTCASSCVTHNPN	LANTHIPEPTIDE	47	training set
MTATTLSPISAPPPVTAGAEASVVAGALDVPADPFDIDLTIITEVDSDLLPRACDTGDGCKPSCASSCASAV	LANTHIPEPTIDE	72	training set
MTRSTVVPSRTEVRPHIPGASDGFDLDVSLVEIADPAGLVNLTDDNCGSTCGACTTNVA	LANTHIPEPTIDE	59	training set
MAPRSTGTTLKSGTDFATHGGSDFDLSIETVASAPVVGMLLNDTGDGCGQTCESACSNSTCE	LANTHIPEPTIDE	62	training set
MNSVLELQELAVDDHEGAPGAPDFSNGSLLNCDSTLSLLICE	LANTHIPEPTIDE	42	training set
MSLLDLQEMELPTDSAEETVLGSGQSQHCSDASWVFC	LANTHIPEPTIDE	37	training set
MEMILNLQELEAPNELSHNDGGGHGGASNLSLLASCANSTVSLLTCH	LANTHIPEPTIDE	47	training set
MTILDLQGMELGYGCGKPKNSCHSKNYCGGGGGGSYLSLLLC	LANTHIPEPTIDE	42	training set
MALLDLQGMESEAPGGGRSHYSRGCGGGSWLSLLIC	LANTHIPEPTIDE	36	training set
MVLLDLQGLEAPAAGDVASGGSTLTVLSCHSGKPSNLSVALCH	LANTHIPEPTIDE	43	training set
MALLDLQALESDEHNGGGASTLSLLSCVSAVSTLLCL	LANTHIPEPTIDE	37	training set
MGFILDMQDLETPEAPSNAMASGHGGGGGGSTTASNASLLLPCSHSTVSLLAC	LANTHIPEPTIDE	53	discard
MQILELQELENGYDYGDDQLVVASTTSLAACDSNFSIIVC	LANTHIPEPTIDE	40	training set
MSLLDLQSMDVPEPETTGGGGGDLSSASLLLCDKHSSHSTLLCL	LANTHIPEPTIDE	44	training set
MAILDLQTMELPETEAAPIDDTLASTSSLSALNCGTSTVSTLLCL	LANTHIPEPTIDE	45	training set
MALLDLQNLKPVEHGGGGGGGGELNSSLSLIGCISSVSFLICL	LANTHIPEPTIDE	43	test set
MSLLDLQSMETPKDELTDEIATGGGSRASLLLCGDSSLSVTTCN	LANTHIPEPTIDE	44	training set
MALLDLQTMESDEYTGGASTASLLSCVSAASVLLCL	LANTHIPEPTIDE	36	training set
MNRVLNLQAMQSEELQKAPGNSSCSWAGCGGCSTASAASCNAAIEIRAV	LANTHIPEPTIDE	49	training set
LQKRKYCQYIYLCKTTKGVIGGYILRNLLIKSILKLQEIEVYDDVHVQPNSTLSVLGCETQSTTSYFFC	LANTHIPEPTIDE	69	training set
MALLDLQGMELADRTGGGDGGGSRASLLLCGDSSLSVTTCN	LANTHIPEPTIDE	41	training set
[truncated: 47,813 more rows]

## Sheet: Supplementary Data 2
id	abbreviation	description
smart00794	AgrD	Staphylococcal AgrD protein. This family consists of several AgrD proteins from many Staphylococcus species. The agr locus was initially described in Staphylococcus aureus as an element controlling the production of exoproteins implicated in virulence. Its pattern of action has been shown to be complex,upregulating certain extracellular toxins and enzymes expressed post-exponentially and repressi…
TIGR04223	quorum_AgrD	cyclic lactone autoinducer peptide. Members of this family of short peptides are precursors to thiolactone (unless Cys is replaced by Ser) cyclic autoinducer peptides,used in quorum-sensing systems in Gram-positive bacteria. The best characterized is the AgrD precursor,processed by the AgrB protein. Nearby proteins regularly encountered include a histidine kinase and a response regulator. This mo…
pfam04647	AgrB	Accessory gene regulator B. The arg locus consists of two transcripts: RNAII and RNAIII. RNAII encodes four genes (agrA,B,C,and D) whose gene products assemble a quorum sensing system. AgrB and AgrD are essential for the production of the autoinducing peptide which functions as a signal for quorum sensing. AgrB is a transmembrane protein.
pfam05931	AgrD	Staphylococcal AgrD protein. This family consists of several AgrD proteins from many Staphylococcus species. The agr locus was initially described in Staphylococcus aureus as an element controlling the production of exoproteins implicated in virulence. Its pattern of action has been shown to be complex,upregulating certain extracellular toxins and enzymes expressed post-exponentially and repressi…
smart00793	AgrB	Accessory gene regulator B. The accessory gene regulator (agr) of Staphylococcus aureus is the central regulatory system that controls the gene expression for a large set of virulence factors. The arg locus consists of two transcripts: RNAII and RNAIII. RNAII encodes four genes (agrA,B,C,and D) whose gene products assemble a quorum sensing system. At low cell density,the agr genes are continuousl…
COG4512	AgrB	Membrane protein putatively involved in post-translational modification of the autoinducing quorum-sensing peptide [Posttranslational modification,protein turnover,chaperones / Signal transduction mechanisms / Transcription].
cd16935	HATPase_AgrC-ComD-like	Histidine kinase-like ATPase domain of two-component sensor histidine kinases similar to Staphylococcus aureus AgrC and Streptococcus pneumoniae ComD which are involved in quorum sensing. This family includes the histidine kinase-like ATPase (HATPase) domains of various two-component sensor histidine kinase (HKs) including Staphylococcus aureus AgrC which is an HK of the accessory gene regulator …
cd17533	REC_LytTR_AgrA-like	phosphoacceptor receiver (REC) domain of LytTR/AlgR family response regulators similar to AgrA. Members of the LytTR/AlgR family of response regulators contain a REC domain and a unique LytTR DNA-binding output domain that lacks the helix-turn-helix motif and consists mostly of beta-strands. Transcriptional regulators with the LytTR-type output domains are involved in biosynthesis of extracellula…
NF000539	plantaricin	plantaricin C family lantibiotic. This family describes plantaricin C-like lantibiotic precursors. The seed alignment straddles the cleavage motif (typically GG),and includes both an extended leader peptide region and a Cys-rich core peptide region. Because of the mosaic structure of lantibiotic precursors,this family can be expected to overlap other lantibiotic precursor families in the same cla…
cd02549	Peptidase_C39A	A sub-family of peptidase family C39. Peptidase family C39 mostly contains bacteriocin-processing endopeptidases from bacteria. The cysteine peptidases in family C39 cleave the "double-glycine" leader peptides from the precursors of various bacteriocins (mostly non-lantibiotic). The cleavage is mediated by the transporter as part of the secretion process. Bacteriocins are antibiotic proteins secr…
TIGR03740	galliderm_ABC	gallidermin-class lantibiotic protection ABC transporter,ATP-binding subunit. Model TIGR03731 represents the family of all lantibiotics related to gallidermin,including epidermin,mutatin,and nisin. This protein family describes the ATP-binding subunit of a gallidermin/epidermin class lantibiotic protection transporter. It is largely restricted to gallidermin-family lantibiotic biosynthesis and ex…
TIGR03733	lanti_perm_MutG	lantibiotic protection ABC transporter permease subunit,MutG family. Model TIGR03731 represents the family of all lantibiotics related to gallidermin,including epidermin,mutatin,and nisin. This protein family is largely restricted to gallidermin-family lantibiotic cassettes,but also include orphan transporter cassettes in species that lack candidate lantibiotic precursor and synthetase genes. In …
pfam16934	Mersacidin	Two-component Enterococcus faecalis cytolysin (EFC). Mersacidin is a cytolysin,a lantibiotic produced by Gram-positive bacteria,The cytolysin is a 'pseudohaemolysin' which produces haemolysis on blood agar plates,but not in broth culture. Mersacidin is one of the type B lantibiotics (lanthionine-containing antibiotics) that contain post-translationally modified amino acids and cyclic ring structu…
cd02418	Peptidase_C39B	A sub-family of peptidase family C39. Peptidase family C39 mostly contains bacteriocin-processing endopeptidases from bacteria. The cysteine peptidases in family C39 cleave the "double-glycine" leader peptides from the precursors of various bacteriocins (mostly non-lantibiotic). The cleavage is mediated by the transporter as part of the secretion process. Bacteriocins are antibiotic proteins secr…
TIGR03893	conserved_domain_protein	type 2 lantibiotic,SP_1948 family. This model recognizes a number of type 2 lantibiotic-type bacteriocins,related to but distinct from the family that includes lichenicidin and mersacidin. Sequence similarity among members consists largely of a 20-residue block of conserved sequence that covers most of the leader peptide region,absent from the mature lantibiotic. This is followed by a region with…
TIGR03897	Lantibiotic_mersacidin_modifying_enzyme	type 2 lantibiotic biosynthesis protein LanM. Members of this family are known generally as LanM,a multifunctional enzyme of lantibiotic biosynthesis. This catalysis by LanM distinguishes the type 2 lantibiotics,such as mersacidin,cinnamycin,and lichenicidin,from LanBC-produced type 1 lantibiotics such as nisin and subtilin. The N-terminal domain contains regions associated with Ser and Thr dehyd…
TIGR03975	hypothetical_protein_PPSIR1_38941	ribosomal peptide maturation radical SAM protein 1. Models TIGR03793 and TIGR03798 describe bacteriocin precursor families to occur often in large paralogous families and are subject to various modifications,including by LanM family lantibiotic synthases and by cyclodehydratases. This model represents a radical SAM protein family that regularly occurs in the context of these bacteriocins,and may …
COG2274	SunT	ABC-type bacteriocin/lantibiotic exporters,contain an N-terminal double-glycine peptidase domain [Defense mechanisms].
cd02419	Peptidase_C39C	A sub-family of peptidase family C39. Peptidase family C39 mostly contains bacteriocin-processing endopeptidases from bacteria. The cysteine peptidases in family C39 cleave the "double-glycine" leader peptides from the precursors of various bacteriocins (mostly non-lantibiotic). The cleavage is mediated by the transporter as part of the secretion process. Bacteriocins are antibiotic proteins secr…
cd04793	LanC	Cyclases involved in the biosynthesis of lantibiotics. LanC is the cyclase enzyme of the lanthionine synthetase. Lanthinoine is a lantibiotic,a unique class of peptide antibiotics. They are ribosomally synthesized as precursor peptides and then post-translationally modified to contain thioether cross-links called lanthionines (Lans) or methyllanthionines (MeLans) in addition to 2,3-didehydroalani…
pfam05147	LANC_like	Lanthionine synthetase C-like protein. Lanthionines are thioether bridges that are putatively generated by dehydration of Ser and Thr residues followed by addition of cysteine residues within the peptide. This family contains the lanthionine synthetase C-like proteins 1 and 2 which are related to the bacterial lanthionine synthetase components C (LanC). LANCL1 (P40 seven-transmembrane-domain prot…
TIGR03732	lanti_perm_MutE	lantibiotic protection ABC transporter permease subunit,MutE/EpiE family. Model TIGR03731 represents the family of all lantibiotics related to gallidermin,including epidermin,mutatin,and nisin. This protein family is largely restricted to gallidermin-family lantibiotic cassettes,but also include orphan transporter cassettes in species that lack candidate lantibiotic precursor and synthetase genes…
cd04792	LanM-like	Cyclases involved in the biosynthesis of class II lantibiotics,and similar proteins. LanM-like proteins. LanM is a bifunctional enzyme,involved in the synthesis of class II lantibiotics. It is responsible for both the dehydration and the cyclization of the precursor-peptide during lantibiotic synthesis. The C-terminal domain shows similarity to LanC,the cyclase component of the lan operon,but the…
pfam03992	ABM	Antibiotic biosynthesis monooxygenase. This domain is found in monooxygenases involved in the biosynthesis of several antibiotics by Streptomyces species. It's occurrence as a repeat in Streptomyces coelicolor SCO1909 is suggestive that the other proteins function as multimers. There is also a conserved histidine which is likely to be an active site residue.
pfam04738	Lant_dehydr_N	Lantibiotic dehydratase,C-terminus. Lantibiotics are ribosomally synthesized antimicrobial agents derived from ribosomally synthesized peptides. They are produced by bacteria of the Firmicutes phylum,and include mutacin,subtilin,and nisin. Lantibiotic peptides contain thioether bridges termed lanthionines that are thought to be generated by dehydration of serine and threonine residues followed by…
TIGR03891	lantibiotic_dehydratase	thiopeptide-type bacteriocin biosynthesis domain. This domain occurs within longer proteins that contain lantibiotic dehydratase domains (see pfam04737 and pfam04738),and as single-domain proteins in bacteriocin biosynthesis genomic contexts. Three named genes in this family,SioK in Streptomyces sioyaensis,TsrD in Streptomyces laurentii,and NosD in Streptomyces actuosus,all occur in regions assoc…
cd07482	Peptidases_S8_Lantibiotic_specific_protease	Peptidase S8 family domain in Lantiobiotic (lanthionine-containing antibiotics) specific proteases. Lantiobiotic (lanthionine-containing antibiotics) specific proteases are very similar in structure to serine proteases. Lantibiotics are ribosomally synthesised antimicrobial agents derived from ribosomally synthesised peptides with antimicrobial activities against Gram-positive bacteria. The prote…
pfam14028	Lant_dehydr_C	Lantibiotic biosynthesis dehydratase C-term. Lant_dehydr_C is the C-terminal domain of a family of dehydratases that are involved in the biosynthesis of lantibiotics. While the extensive N-terminal domain,pfam04738,is involved in the serine-threonine glutamylation step of the synthetic process,this C-terminal domain,once thought to be a separate domain from the dehydratase enzymic activity,is nec…
NF033383	induct_EntF	EntF family bacteriocin induction factor. Members of this family have leader sequences like bacteriocins (see TIGR01847),but characterized examples function as signaling peptides that induce production of a nearby encoded bacteriocin,rather than as bacteriocins themselves. The founding member of this family is enterocin induction factor EntF.
pfam09204	Colicin_immun	Bacterial self-protective colicin-like immunity. Colicin D,which is synthesized by various prokaryotes,adopts an antiparallel four helical bundle fold: the helices are tightly packed,forming a compact cylindrical molecule. The protein specifically cleaves the anticodon loop of all four tRNA-Arg isoacceptors,thereby inactivating prokaryotic protein synthesis and leading to cell death. This family …
TIGR04066	conserved_hypothetical_protein	peptide maturation system protein,TIGR04066 family. Members of this protein family occur in various Clostridial genomes,always in the context of a short peptide and a radical SAM protein predicted to modify the short peptide. PSI-BLAST analysis suggests a sequence relationship to archaeal proteins designated as subunits of an H+-transporting two-sector ATPase. The modified peptide is likely to be…
TIGR04085	radical_SAM_protein	radical SAM additional 4Fe4S-binding SPASM domain. This domain contains regions binding additional 4Fe4S clusters found in various radical SAM proteins C-terminal to the domain described by model pfam04055. Radical SAM enzymes with this domain tend to be involved in protein modification,including anaerobic sulfatase maturation proteins,a quinohemoprotein amine dehydrogenase biogenesis protein,the…
TIGR03608	L_ocin_972_ABC	putative bacteriocin export ABC transporter,lactococcin 972 group. A gene pair with a fairly wide distribution consists of a polypeptide related to the lactococcin 972 (see TIGR01653) and multiple-membrane-spanning putative immunity protein (see TIGR01654). This model represents a small clade within the ABC transporters that regularly are found adjacent to these bacteriocin system gene pairs and …
pfam01721	Bacteriocin_II	Class II bacteriocin. The bacteriocins are small peptides that inhibit the growth of various bacteria. Bacteriocins of lactic acid bacteria may inhibit their target cells by permeabilising the cell membrane.
TIGR01000	Mesentericin_Y105_secretion_protein_MesE	bacteriocin secretion accessory protein. This family represents an accessory protein that works with the bacteriocin maturation and ABC transport secretion protein described by TIGR01193. [Transport and binding proteins,Other].
TIGR04068	Radical_SAM_domain_protein	Cys-rich peptide radical SAM maturase CcpM. Members of this family are radical SAM enzymes that occur next to clostridial Cys-rich predicted bacteriocin (or other class of ribosomal natural product) precursors (see families TIGR04065 and TIGR04067). They include a TIGR04085 C-terminal additional 4Fe4S cluster-binding domain that is associated with peptide modification by radical SAM enzymes,and t…
TIGR03604	hypothetical_protein	thiazole/oxazole-forming peptide maturase,SagD family component. Members of this protein family include enzymes related to SagD,previously referred to as a scaffold or docking protein involved in the biosynthesis of streptolysin S in Streptococcus pyogenes from the protoxin polypeptide (product of the sagA gene). Newer evidence describes an enzymatic activity,an ATP-dependent cyclodehydration rea…
TIGR01193	transport/processing_ATP-binding_protein	ABC-type bacteriocin transporter. This model describes ABC-type bacteriocin transporter. The amino terminal domain (pfam03412) processes the N-terminal leader peptide from the bacteriocin while C-terminal domains resemble ABC transporter membrane protein and ATP-binding cassette domain. In general,bacteriocins are agents which are responsible for killing or inhibiting the closely related species …
TIGR04067	bacteriocin_precursor_CLOSPO_01332_family	putative bacteriocin precursor,CLOSPO_01332 family. Members of this protein family are Cys-rich putative bacteriocin precursor peptides found in a few strains of Clostridium and Anaerococcus. This family is related to the family of CLI_3235 (TIGR04065). Members of both families are found next to a CLI_3234 family radical SAM protein that appears to perform post-translational modification.
TIGR01654	unnamed_protein_product	bacteriocin-associated integral membrane (putative immunity) protein. This model represents a family of integral membrane proteins,most of which are about 650 residues in size and predicted to span the membrane seven times. Nearly half of the members of this family are found in association with a member of the lactococcin 972 family of bacteriocins (TIGR01653). Others may be associated with uncha…
TIGR04065	hypothetical_protein_CpapDRAFT_0557	putative bacteriocin precursor,CLI_3235 family. Members of this protein family are Cys-rich putative bacteriocin precursor peptides restricted to the Clostridia but found in multiple species with up to three per genome. They are found next to a CLI_3234 family radical SAM protein that may perform post-translational modification. This model describes approximately 35 residues starting from the N-t…
TIGR04148	conserved_hypothetical_protein	radical SAM peptide maturase,GG-Bacteroidales family. Members of this protein family are radical SAM enzymes (pfam04055) with the additional C-terminal region (TIGR04085) that is frequently a marker of peptide modification. Many members of this family are found in the vicinity of one or several ORFs encoding short polypeptides with a Gly-Gly motif (common for bacteriocin leader peptide cleavage),…
TIGR03891	lantibiotic_dehydratase	thiopeptide-type bacteriocin biosynthesis domain. This domain occurs within longer proteins that contain lantibiotic dehydratase domains (see pfam04737 and pfam04738),and as single-domain proteins in bacteriocin biosynthesis genomic contexts. Three named genes in this family,SioK in Streptomyces sioyaensis,TsrD in Streptomyces laurentii,and NosD in Streptomyces actuosus,all occur in regions assoc…
TIGR03605	antibiot_sagB	SagB-type dehydrogenase domain. SagB of Sterptococcus pyogenes participates in the maturation of streptolysin S from a ribosomally produced precursor polypeptide. Chemically similar systems operate on highly diverse sets of bacteriocin precursors in numerous other bacteria. This model describes a domain within SgaB and homologous regions from other proteins,many of which appear to be involved in …
pfam09683	Lactococcin_972	Bacteriocin (Lactococcin_972). These sequences represent bacteriocins related to lactococcin. Members tend to be found in association with a seven transmembrane putative immunity protein.
TIGR00702	Uncharacterized_protein_Rv1375/MT1419	YcaO-type kinase domain. This protein family includes YcaO and homologs that can phosphorylate a peptide amide backbone (rather than side chains),as during heterocycle-forming modifications during maturation of the TOMM class (Thiazole/Oxazole-Modified Microcins) of bacteriocins. However,YcaO domain proteins also occur in contexts that do not suggest peptide modification. [Hypothetical proteins,C…
pfam08951	EntA_Immun	Enterocin A Immunity. Gram-positive lactobacilli produce bacteriocins to kill closely-related competitor species. To protect themselves from the bacteriocidal activity of this molecule they co-express an immunity protein (for discussion of this operon see Bacteriocin_IIc pfam10439). The immunity protein structure is a soluble,cytoplasmic,antiparallel four alpha-helical globular bundle with a fift…
TIGR03974	six-Cys-in-45_modification_radical_SAM_protein	SCIFF radical SAM maturase. Members of this protein family are predicted radical SAM enzymes universally associated with Six Cysteines in Forty-Five protein,or SCIFF (family TIGR03973),a predicted ribosomal natural product precursor that is nearly universal in the class Clostridia. Similarity of this family to radical SAM maturases (PqqE and subtilosin A maturase) found in the vicinity of other p…
TIGR03966	actino_HemFlav	heme/flavin dehydrogenase,mycofactocin system. Members of this protein family possess an N-terminal heme-binding domain and C-terminal flavodehydrogenase domain,and share homology to yeast flavocytochrome b2,to E. coli L-lactate dehydrogenase [cytochrome],to (S)-mandelate dehydrogenase,etc. This enzyme appears only in the context of the mycofactocin system. Interestingly,it is absent from the fou…
TIGR03964	uncharacterized_protein_putative_amidase	mycofactocin system creatininase family protein. Members of this protein family are uncharacterized Actinobacterial proteins,with homology to creatinine amidohydrolase from Pseudomonas. Members occur only in the context of the mycofactocin system. [Unknown function,Enzymes of unknown specificity].
TIGR03968	transcriptional_regulator_TetR_family	mycofactocin system transcriptional regulator. Members of this family are TetR family putative transcriptional regulators that occur in genome contexts near proteins of the mycofactocin system. These include the precursor peptide (TIGR03969),a radical SAM peptide maturase (TIGR03962),and a putative carrier protein (TIGR03967). [Regulatory functions,DNA interactions].
TIGR04115	radical_SAM_superfamily_protein	radical SAM peptide maturase,CXXX-repeat target family. Members of this radical SAM domain protein are predicted peptide maturases,similar to PqqE,AlbA,the mycofactocin radical SAM maturase,and many others that share the peptide modification radical SAM protein C-terminal additional 4Fe4S-binding domain (TIGR04085). Members co-occur with a protein of unknown function that may be a chaperone or im…
TIGR03969	conserved_hypothetical_protein	mycofactocin precursor. Members of this protein family occur in Mycobacterium tuberculosis and many other Actinobacteria,as well as some delta-Proteobacteria (e.g. Geobacter uraniireducens),Firmicutes (Pelotomaculum thermopropionicum and Desulfotomaculum acetoxidans),and Chloroflexi (Thermomicrobium roseum DSM 5159 and Sphaerobacter thermophilus DSM 20745). Members sometimes are missed during gen…
TIGR03965	glycosyltransferase_Rv0696_family	mycofactocin system glycosyltransferase. Members of this protein family are putative glycosyltransferases,members of pfam00535 (glycosyl transferase family 2). Members appear mostly in the Actinobacteria,where they appear to be part of a system for converting a precursor peptide (TIGR03969) into a novel redox carrier designated mycofactocin. A radical SAM enzyme,TIGR03962,is a proposed to be a ke…
TIGR03962	mycofact_rSAM	mycofactocin radical SAM maturase. Members of this family are uncharacterized radical SAM proteins from the Mycobacterium tuberculosis and many other Actinobacteria,as well as some deltaproteobacteria (e.g. Geobacter uraniireducens),firmicutes (Pelotomaculum thermopropionicum and Desulfotomaculum acetoxidans),and Chloroflexi (Thermomicrobium roseum DSM 5159 and Sphaerobacter thermophilus DSM 2074…
TIGR03967	hypothetical_protein_FraEuI1cDRAFT_6405	putative mycofactocin binding protein MftB. Families TIGR03969 and TIGR03962 describe,respectively,the putative mycofactocin precursor and its cognate radical SAM peptide maturase. This small protein family appears in the same sporadically distributed cassette and may serve as a scaffolding protein during mycofactocin maturation or as a carrier protein for the mature product,a putative novel redo…
TIGR03549	TIGR03549	YcaO domain protein. This family consists of remarkably well-conserved proteins from gamma and beta Proteobacteria,heavily skewed towards organisms of marine environments. Its gene neighborhood is not conserved. This family has an OsmC-like N-terminal domain. It shares a YcaO domain,frequently associated with ATP-dependent cyclodehydration for peptide modification. The function is unknown. Fiftee…
pfam02624	YcaO	YcaO cyclodehydratase,ATP-ad Mg2+-binding. YcaO is an ATP- an Mg2+-binding protein involved in the peptidic biosynthesis of azoline. There three motifs involved in the binding are,in UniProtKB:P75838,71-79: Sx3ExxER,184-203: Sx6Ex3Qx3ExxER,and 286-290: RxxxE. Three slightly different functional families are represented in this family,proteins involved in TOMM (thiazole/oxazole-modified microcin) …
pfam01944	SpoIIM	Stage II sporulation protein M. SpoIIM is on e of four stage II sporulation proteins that is necessary for the forespore inside the mother-cell to be properly internalized through the breakdown of peptidoglycans trapped between the membranes of the septum separating the forespore and the mother-cell. The four proteins working in sequence are SpoIIB,pfam05036,SpoIIM,SpoIIP,pfam07454,and finally Sp…
pfam05402	PqqD	Coenzyme PQQ synthesis protein D (PqqD). This family contains several bacterial coenzyme PQQ synthesis protein D (PqqD) sequences. This protein is required for coenzyme pyrrolo-quinoline-quinone (PQQ) biosynthesis.
COG0612	PqqL	Predicted Zn-dependent peptidases [General function prediction only].
COG2124	CypX	Cytochrome P450 [Secondary metabolites biosynthesis,transport,and catabolism].
TIGR04538	P450_cycloAA_1	cytochrome P450,cyclodipeptide synthase-associated. Members of this subfamily are cytochrome P450 enzymes that occur next to tRNA-dependent cyclodipeptide synthases. This group does NOT include CYP121 (Rv2275) from Mycobacterium tuberculosis,adjacent to the cyclodityrosine synthetase Rv2276.
pfam03602	Cons_hypoth95	Conserved hypothetical protein 95.
pfam01841	Transglut_core	Transglutaminase-like superfamily. This family includes animal transglutaminases and other bacterial proteins of unknown function. Sequence conservation in this superfamily primarily involves three motifs that centre around conserved cysteine,histidine,and aspartate residues that form the catalytic triad in the structurally characterized transglutaminase,the human blood clotting factor XIIIa'. On…
pfam00069	Pkinase	Protein kinase domain.
COG4167	SapF	ABC-type antimicrobial peptide transport system,ATPase component [Defense mechanisms].
COG4170	SapD	ABC-type antimicrobial peptide transport system,ATPase component [Defense mechanisms].
COG0577	SalY	ABC-type antimicrobial peptide transport system,permease component [Defense mechanisms].
COG1136	SalX	ABC-type antimicrobial peptide transport system,ATPase component [Defense mechanisms].
cd04791	LanC_SerThrkinase	Lanthionine synthetase C-like domain associated with serine/threonine kinases. Some members of this subgroup lack the zinc binding site and the active site residues,and therefore are most likely inactive. The function of this domain is unknown.
TIGR03995	hypothetical_protein_BcellDRAFT_3296	putative rSAM target protein,CGCGG family. Members of this family of small proteins,approx. 100 amino acids in length,co-occur with a subfamily of radical SAM protein in several species in the Halobacteria and in Bacillus. The radical SAM protein belongs to a branch in which most characterized members act on peptide substrates. The lack of homology of this family to any known enzyme and the disti…
TIGR04340	radical_SAM_domain_protein	radical SAM/SPASM domain protein,ACGX system. Members of this protein family are radical SAM/SPASM domain proteins likely to be involved in the modification of small,Cys-rich peptides. Members of the family of proposed target sequences,TIGR04341,average 75 amino acids in length and average six instances of the motif ACGX,where X is A,S,or T.
pfam13529	Peptidase_C39_2	Peptidase_C39 like family.
PRK01100	PRK01100	accessory gene regulator ArgB-like protein.
TIGR03651	possible_peptide_antibiotic_precursor?	circular bacteriocin,circularin A/uberolysin family. Circular bacteriocins are antibiotic proteins made by ribosomal translation of a precursor molecular,followed by cleavage and circularization. Members of this subclass of the circular bacteriocins include circularin A from Clostridium beijerinckii,bacteriocin AS-48 from Enterococcus faecalis,uberolysin from Streptococcus uberis,and carnocyclin …
cd03245	ABCC_bacteriocin_exporters	ATP-binding cassette domain of bacteriocin exporters,subfamily C. Many non-lantibiotic bacteriocins of lactic acid bacteria are produced as precursors which have N-terminal leader peptides that share similarities in amino acid sequence and contain a conserved processing site of two glycine residues in positions -1 and -2. A dedicated ATP-binding cassette (ABC) transporter is responsible for the p…
cd07062	Peptidase_S66_mccF_like	Microcin C7 self-immunity protein determines resistance to exogenous microcin C7. Microcin C7 self-immunity protein (mccF): MccF,a homolog of the LD-carboxypeptidase family,mediates resistance against exogenously added microcin C7 (MccC7),a ribosomally-encoded peptide antibiotic that contains a phosphoramidate linkage to adenosine monophosphate at its C-terminus. The plasmid-encoded mccF gene is …
TIGR01295	Pediocin_PA-1_biosynthesis_protein_PedC	bacteriocin transport accessory protein,putative. This model describes a small family of proteins believed to aid in the export of various class II bacteriocins,which are ribosomally-synthesized,non-lantibiotic bacterial peptide antibiotics. Members of this family are found in operons for pediocin PA-1 from Pediococcus acidilactici and brochocin-C from Brochothrix campestris.
TIGR04463	Radical_SAM_domain_protein	radical SAM/SPASM domain protein maturase. Members of this family are probable protein/peptide-modifying radical SAM/SPASM domain proteins. The majority of members of this family seem to target Cys-rich repetitive regions of large proteins rather than of bacteriocin-sized small precursors. This arrangement suggests the modification target may be multifunctional,with the C-terminal domain behaving…
pfam16942	CclA_1	Putative cyclic bacteriocin. This is a family of short proteins from Gram- putatively from the carnocylcin A family of bacteriocins.
pfam12173	BacteriocIIc_cy	Bacteriocin class IIc cyclic gassericin A-like. This class of bacteriocins was previously described as class V. The members include gassericin A,acidocin B and butyrovibriocin AR10,all of which are hydrophobic cyclical structures. The N- and C-termini are covalently linked,and the circular molecule is resistant to several proteases and peptidases. The immunity protein that protects Lactobacillus …
NF033215	BlpC_Streptocco	quorum-sensing system pheromone BlpC. Members of this family are BlpC,a peptide pheromone that stimulates production of BLP (bacteriocin-like peptides) family class II bacteriocins. BlpC peptides fall within the broader family of PF03047,a homology family of pheromone/bacteriocin precursors that is also restricted to Streptococcus. The PF03047 HMM runs only a few residues past the GlyGly precurso…
cd03245	ABCC_bacteriocin_exporters	ATP-binding cassette domain of bacteriocin exporters,subfamily C. Many non-lantibiotic bacteriocins of lactic acid bacteria are produced as precursors which have N-terminal leader peptides that share similarities in amino acid sequence and contain a conserved processing site of two glycine residues in positions -1 and -2. A dedicated ATP-binding cassette (ABC) transporter is responsible for the p…
pfam10439	Bacteriocin_IIc	Bacteriocin class II with double-glycine leader peptide. This is a family of bacteriocidal bacteriocins secreted by Streptococcal species in order to kill off closely-related competitor Gram-positives. The sequence includes the peptide precursor,this being cleaved off proteolytically at the double-glycine. The family does not carry the YGNGVXC motif characteristic of pediocin-like Bacteriocins,Ba…
pfam09221	Bacteriocin_IId	Bacteriocin class IId cyclical uberolysin-like. Members of this family are membrane-interacting peptides,produced by Firmicutes that display a broad anti-microbial spectrum against Gram-positive and Gram-negative bacteria. They adopt a helical structure,with four or five alpha helices forming a Saposin-like fold. The structure has been found to be cyclical. It should be pointed out that one refer…
TIGR03949	bact_IIb_cerein	class IIb bacteriocin,lactobin A/cerein 7B family. Members of this protein family are described variably as bacteriocins per se,one chain of a two-chain bacteriocin,or bacteriocin enhancer proteins. All members of the seed alignment occur in paired gene contexts with another member of the same protein family. This family includes bacteriocins that appear not to undergo post-translational modifica…
TIGR04184	hypothetical_protein_HMPREF0204_12500	ATP-grasp ribosomal peptide maturase,MvdD family. The pair of ATP-grasp proteins MvdD and MvdC (microviridin D and C),as well as an acetyltransferase,produce microviridin K,an example of a RiPP (ribosomally synthesized and posttranslationally modified peptide). Microviridins are peptidase inhibitors.
TIGR04185	RimK-like_ATP-grasp_domain_protein	ATP-grasp ribosomal peptide maturase,MvdC family. The pair of ATP-grasp proteins MvdD and MvdC (microviridin D and C),as well as an acetyltransferase,produce microviridin K,an example of a RiPP (ribosomally synthesized and posttranslationally modified peptide). Microviridins are peptidase inhibitors. This family includes MvdC and corresponding members of similar cassettes.
TIGR04032	conserved_hypothetical_protein	antimicrobial peptide,SdpC family. This protein family contains the antimicrobial peptide SdpC,used in cannibalistic killing by Bacillus subtilis,and related sequences in species as distant as Myxococcus xanthus from the Deltaproteobacteria. A conserved gene neighborhood includes proteins associated with immunity.
TIGR04033	conserved_hypothetical_protein	antimicrobial peptide system protein,SdpB family. Members of this protein family resemble SdpB (Sporulation Delaying Protein B),an integral membrane protein associated with production of the cannibalism peptide SdpC in Bacillus subtilis. Similar proteins are found in Myxococcus xanthus.
pfam18381	YcaO_C	YcaO cyclodehydratase C-terminal domain. This is the proline-rich C-terminal domain found in ribosomal protein S12 methylthiotransferase accessory factor YcaO. It has been shown to be involved in both C protein recognition and cyclodehydration. The C-terminal domain resembles a tetratricopeptide repeat that mediates dimerization.
NF033416	YM-216391_RiPP	YM-216391 family RiPP peptide. YM-216391 represents one of the rarer known classes of ribosomally translated,post-translationally modified peptide (RiPP) antibiotics.
TIGR03731	Lantibiotic_mutacin-1140	lantibiotic,gallidermin/nisin family. Members of this family are lantibiotic precursors in the family that includes gallidermin,nisin,mutacin,epidermin,and streptin. [Cellular processes,Toxin production and resistance].
pfam07812	TfuA	TfuA-like protein. This family consists of a group of sequences that are similar to a region of TfuA protein. This protein is involved in the production of trifolitoxin (TFX),an gene-encoded,post-translationally modified peptide antibiotic. The role of TfuA in TFX synthesis is unknown,and it may be involved in other cellular processes.
pfam11083	Streptin-Immun	Lantibiotic streptin immunity protein. Streptococcal species produce a lantibiotic,streptin,in a similar manner to the production of nisin and subtilin by other lactic acid bacteria,in order to compete against competing bacteria within the environment. The immunity protein protects the bacterium from destruction by its own lantibiotic. In general,there is little homology between the immunity prot…
pfam03412	Peptidase_C39	Peptidase C39 family. Lantibiotic and non-lantibiotic bacteriocins are synthesized as precursor peptides containing N-terminal extensions (leader peptides) which are cleaved off during maturation. Most non-lantibiotics and also some lantibiotics have leader peptides of the so-called double-glycine type. These leader peptides share consensus sequences and also a common processing site with two con…
cd04434	LanC_like	Cyclases involved in the biosynthesis of lantibiotics,and similar proteins. LanC is the cyclase enzyme of the lanthionine synthetase. Lanthionine is a lantibiotic,a unique class of peptide antibiotics. They are ribosomally synthesized as a precursor peptide and then post-translationally modified to contain thioether cross-links called lanthionines (Lans) or methyllanthionines (MeLans),in addition…
NF033414	bottro_RiPP	bottromycin family RiPP peptide. Bottromycins are one of the rarer known classes of ribosomally translated,post-translationally modified peptide (RiPP) antibiotics.
TIGR04195	hypothetical_protein_SPBc2p022	peptide S-glycosyltransferase,SunS family. Members of this family include SunS,the S-glycosyltransferase that transfers a sugar (substrate is variable in reconstitution assays) onto the precursor of the glycopeptide sublancin,which once was thought to be a lantibiotic.
cd02423	Peptidase_C39G	A sub-family of peptidase family C39. Peptidase family C39 mostly contains bacteriocin-processing endopeptidases from bacteria. The cysteine peptidases in family C39 cleave the "double-glycine" leader peptides from the precursors of various bacteriocins (mostly non-lantibiotic). The cleavage is mediated by the transporter as part of the secretion process. Bacteriocins are antibiotic proteins secr…
pfam13575	DUF4135	Domain of unknown function (DUF4135). This presumed domain is functionally uncharacterized. This domain family is found in bacteria and archaea,and is approximately 380 amino acids in length. The family is found in association with pfam05147. This domain may be involved in synthesis of a lantibiotic compound.
cd07474	Peptidases_S8_subtilisin_Vpr-like	Peptidase S8 family domain in Vpr-like proteins. The maturation of the peptide antibiotic (lantibiotic) subtilin in Bacillus subtilis ATCC 6633 includes posttranslational modifications of the propeptide and proteolytic cleavage of the leader peptide. Vpr was identified as one of the proteases, along with WprA,that are capable of processing subtilin. Asp,Ser,His triadPeptidases S8 or Subtilases ar…
TIGR04364	methyltran_FxLD	methyltransferase,FxLD system. Members of this family resemble occur regularly in the vicinity of lantibiotic biosynthesis enzymes and their probable target,the FxLD family of putative ribosomal natural product precursor (TIGR04363). Members resemble protein-L-isoaspartate O-methyltransferase (TIGR00080) and a predicted methyltranserase,TIGR04188,of another putative peptide modification system.
pfam17508	MccV	Microcin V bacteriocin. Family members are bacterial microcin-V peptides MccV,also known as colicin V. MccV was the first antibiotic substance reported to be produced by E. coli. This antibacterial agent was initially named colicin V (ColV). However,on account of several characteristics (low molecular mass,non-inducible production,and dedicated export system),it became classified within the micro…
NF033430	TfxA_RiPP	trifolitoxin family RiPP peptide. Trifolitoxin is ribosomally synthesized and post-translationally modified peptide natural product (RiPP) antibiotic produced by some strains of Rhizobium and active against others. At the time of building this model,only two variants sequences from this family are detected,both 42 amino acid-long TfxA peptides that differ at only two positions.
pfam14406	Bacteroid_pep	Ribosomally synthesized peptide in Bacteroidetes. Ribosomally synthesized peptide that is usually in the gene neighborhood of a RimK-like ATP-grasp,and an ABC ATPase fused to a papain-like domain. It is often present in multiple tandem gene copies. The gene contexts suggest that it is modified by the ATP-grasp as in the biosynthesis of microviridin and marinostatin. They might function in defense…
TIGR04064	rSAM_nif11	nif11-like peptide radical SAM maturase. Members of this family are radical SAM enzymes that occur co-clustered with nif11-related ribosomal natural product (RNP) precursors described by TIGRFAMs model TIGR03798. Homology within the bacteriocin family reflects largely constraints on the leader peptide,tied to processes such as cleavage and export,and members associate with various families of mat…
TIGR03896	cyc_nuc_ocin	bacteriocin-type transport-associated protein. Members of this protein family are uncharacterized and contain two copies of the cyclic nucleotide-binding domain pfam00027. Members are restricted to select cyanobacteria but are found regularly in association with a transport operon that,in turn,is associated with the production of putative bacteriocins. The models describing the transport operon a…
TIGR03882	hypothetical_protein	bacteriocin biosynthesis cyclodehydratase domain. This model describes a ThiF-like domain of a fusion protein found in clusters associated with the production of TOMMs (thiazole/oxazole-modified microcins),small bacteriocins with characteristic heterocycle modifications. This domain is presumed to act as a cyclodehydratase,as do members of the SagC family modeled by TIGR03603.
TIGR03794	conserved_hypothetical_protein	NHLM bacteriocin system secretion protein. Members of this protein family are homologs of the HlyD membrane fusion protein of type I secretion systems. Their occurrence in prokaryotic genomes is associated with the occurrence of a novel class of microcin (small bacteriocins) with a leader peptide region related to nitrile hydratase. We designate the class of bacteriocin as Nitrile Hydratase Leade…
TIGR03797	ABC_transporter_related	NHLM bacteriocin system ABC transporter,ATP-binding protein. Members of this protein family are ABC transporter ATP-binding subunits,part of a three-gene putative bacteriocin transport operon. The other subunits include another ATP-binding subunit (TIGR03796),which has an N-terminal leader sequence cleavage domain,and an HlyD homolog (TIGR03794). In a number of genomes,members of protein families…
TIGR03603	cyclo_dehy_ocin	thiazole/oxazole-forming peptide maturase,SagC family component. Members of this protein family include enzymes related to SagC,a protein involved in thiazole/oxazole cyclodehydration modifications during biosynthesis of streptolysin S in Streptococcus pyogenes from the protoxin polypeptide (product of the sagA gene). Recent evidence suggests that the YcaO/SagD-like component,not this component,p…
cd18570	ABC_6TM_PCAT1_LagD_like	Six-transmembrane helical domain (6-TMD) of the peptidase-containing ATP-binding cassette transporters. This group includes the 6-TMD of the peptidase-containing ATP-binding cassette transporters (PCATs) such as Clostridium thermocellum PCAT1,a polypeptide processing and secretion transporter,and LagD,a bacteriocin ABC transporter from Lactococcus lactis. Bacterial exporters are typically formed …
pfam03412	Peptidase_C39	Peptidase C39 family. Lantibiotic and non-lantibiotic bacteriocins are synthesized as precursor peptides containing N-terminal extensions (leader peptides) which are cleaved off during maturation. Most non-lantibiotics and also some lantibiotics have leader peptides of the so-called double-glycine type. These leader peptides share consensus sequences and also a common processing site with two con…
TIGR03693	ocin_ThiF_like	putative thiazole-containing bacteriocin maturation protein. Members of this protein family are found in a three-gene operon in Bacillus anthracis and related Bacillus species,where the other two genes are clearly identified with maturation of a putative thiazole-containing bacteriocin precursor. While there is no detectable pairwise sequence similarity between members of this family and the prop…
cd02423	Peptidase_C39G	A sub-family of peptidase family C39. Peptidase family C39 mostly contains bacteriocin-processing endopeptidases from bacteria. The cysteine peptidases in family C39 cleave the "double-glycine" leader peptides from the precursors of various bacteriocins (mostly non-lantibiotic). The cleavage is mediated by the transporter as part of the secretion process. Bacteriocins are antibiotic proteins secr…
pfam12639	Colicin-DNase	DNase/tRNase domain of colicin-like bacteriocin. Colicin-like bacteriocins are complex structures with an N-terminal beta-barrel translocation domain (pfam09000),a long double-alpha-helical receptor-binding domain (pfam11570) and this C-terminal RNAse/DNase domain with endonuclease activity. Their competitor bacteriocidal action is by a process that involves binding to a surface receptor,entering…
TIGR03796	ABC_transporter_related	NHLM bacteriocin system ABC transporter,peptidase/ATP-binding protein. This protein describes a multidomain ABC transporter subunit that is one of three protein families associated with some regularity with a distinctive family of putative bacteriocins. It includes a bacteriocin-processing peptidase domain at the N-terminus. Model TIGR03793 describes a conserved propeptide region for this bacteri…
NF033402	linaridin_RiPP	linaridin family RiPP. Linaridins are ribosomally translated,post-translationally modified peptide natural products,or RiPPs. Examples include cypemycin,SGR-1832,and legonaridin.
NF033434	AzmA_fam_RiPP	azolemycin family RiPP peptide. The azolemycin precursor peptide,AzmA,contains a mature (core) peptide region derived from the sequence VVSTCTI. Examining genomic context from that RiPP precursor peptides related to AzmA are much more similar in the leader peptide region than in the core region,and that the proper length for the percursor peptide is probably about 36 amino acids.
TIGR04103	heme_biosynthesis_protein	nif11-class peptide radical SAM maturase 3. Members of this protein family are peptide-modifying radical SAM enzymes,with a C-terminal additional 4Fe-4S cluster binding domain like many other peptide-modifying radical SAM enzymes. This form occurs primarily in the genera Cyanothece and Nostoc.
pfam07862	Nif11	Nif11 domain. This domain is found mainly in the Cyanobacteria and in Proteobacteria such as the nitrogen-fixing bacterium Azotobacter vinelandii. It is found in Nif11,a protein described in Azotobacter as linked to nitrogen fixation. It also constitutes a leader peptide in Nif11-derived peptides (N11P),which are thought to be post-translationally modified microcins derived from a putative nitrog…
TIGR04193	hypothetical_protein_KAOT1_08193	SPASM domain peptide maturase,grasp-with-spasm system. A 4Fe-4S-binding C-terminal domain is shared by radical SAM maturases for Subtilosin A (S),PQQ (P),Anaerobic sulfatases (AS),and mycofactocin (M),hence SPASM. Radical SAM proteins with SPASM tend to be peptide maturases. All members of this family,like some members of the quasi-rSAM family TIGR04105,lack the 4Fe-4S cluster of the radical SAM …
TIGR04542	GMC_mycofac_2	GMC family mycofactocin-associated oxidreductase. This model describes a set of dehydrogenases belonging to the glucose-methanol-choline oxidoreductase (GMC oxidoreductase) family. Members of the present family are restricted to the bacterial genus Gordonia,and seem to replace the related family TIGR03970,which occurs in Actinobacteria generally but not in the genus Gordonia. Members of both this…
TIGR03996	mycofact_OYE_1	mycofactocin system FadH/OYE family oxidoreductase 1. The yeast protein called old yellow enzyme and FadH from Escherichia coli (2,4-dienoyl CoA reductase) are enzymes with 4Fe-4S,FMN,and FAD prosthetic groups,and interact with NADPH as well as substrate. Members of this related protein family occur in the vicinity of the putative mycofactocin biosynthesis operon in a number of Actinobacteria suc…
TIGR03997	NADH:flavin_oxidoreductase	mycofactocin system FadH/OYE family oxidoreductase 2. The yeast protein called old yellow enzyme and FadH from Escherichia coli (2,4-dienoyl CoA reductase) are enzymes with 4Fe-4S,FMN,and FAD prosthetic groups,and interact with NADPH as well as substrate. Members of this related protein family occur in the vicinity of the putative mycofactocin biosynthesis operon in a number of Actinobacteria suc…
TIGR04071	Methanobactin_mb-OB3b	methanobactin precursor,Mb-OB3b family. Methanobactins are siderophore-like copper-chelating natural products with considerable variety from species to species. The 11-residue methanobactin of Methylosinus trichosporium OB3b is derived from a 30-residue precursor. A very similar 31-residue precursor is found in the rice endophyte Azospirillum sp. B510,which has not yet been shown to produce a met…
pfam05114	DUF692	Protein of unknown function (DUF692). This family consists of several uncharacterized bacterial proteins.
TIGR04159	conserved_hypothetical_protein	methanobactin biosynthesis cassette protein MbnB. The first characterized methanobactin is made from a ribosomal precursor in Methylosinus trichosporium OB3b. Two additional species with homologous precursor peptides (family TIGR04071) are Azospirillum sp. B510 and Gluconacetobacter sp. SXCC-1. This model describes a clique of related sequences,domain or full-length,that occurs always and only ne…
pfam13186	SPASM	Iron-sulfur cluster-binding domain. This domain occurs as an additional C-terminal iron-sulfur cluster binding domain in many radical SAM domain,pfam04055 proteins. The domain occurs in a number of proteins that modify a protein to become an active enzyme,or a peptide to become a ribosomal natural product. The domain is named SPASM because it occurs in the maturases of Subilitosin,PQQ,Anaerobic S…
PRK00312	pcm	protein-L-isoaspartate(D-aspartate) O-methyltransferase.
TIGR04078	radical_SAM_domain_protein_protein	peptide modification radical SAM enzyme,YydG family. Members of this radical SAM protein family for peptide modification occur only in the context of members of family TIGR04077,which average about 50 amino acids in length. In Bacillus subtilis,this protein (YydG) appears to act on its cognate target peptide (YydF) prior to its export,and result in the creation of a signaling molecule that induce…
TIGR04303	radical_SAM_protein	GeoRSP system radical SAM/SPASM protein. Members of this family are radical SAM/SPASM domain proteins from a cassette restricted to the genus Geobacter. Genes always found adjacent include a non-radical SAM protein with a closely related SPASM domain and a short stretch of N-terminal homology as well to this family,and also a PqqD-like protein. The three-gene cassette is designated GeoRSP for the…
TIGR03859	PQQ_PqqD	coenzyme PQQ biosynthesis protein PqqD. This model identifies PqqD,a protein involved in the final steps of the biosynthesis of pyrroloquinoline quinone,coenzyme PQQ. [Biosynthesis of cofactors,prosthetic groups,and carriers,Other].
pfam08042	PqqA	PqqA family. This family consists of proteins belonging to the coenzyme Pyrroloquinoline quinone A (pqqA) family. PQQ is the non-covalently bounded prosthetic group of many quinoproteins catalyzing reactions in the periplasm of Gram-negative bacteria. PQQ is formed by the fusion of glutamate and tyrosine and synthesis of PQQ require the proteins encoded by the pqqABCDEF operon but details of the …
PRK02079	PRK02079	pyrroloquinoline quinone biosynthesis peptide chaperone PqqD.
PRK05301	PRK05301	pyrroloquinoline quinone biosynthesis protein PqqE; Provisional.
NF033432	ThioGly_TfuA_rel	TfuA-related McrA-glycine thioamidation protein.
TIGR04192	hypothetical_protein_KAOT1_08203	ATP-GRASP peptide maturase,grasp-with-spasm system. Members of this protein family are ATP-GRASP proteins that occur in a peptide maturation cassette with a SPASM domain protein. SPASM (TIGR04085) usually occurs as a C-terminal extension to radical SAM enzymes that act as peptide maturases,although it can occur independently.
TIGR04218	PtnA_protein	ribosomal natural product,plantazolicin-class. Members of this protein family are precursors of TOMMs,that is,thizazole/oxazole-modified microcins. Members are about 42 residues in length,have a C-terminal region of extremely low complexity rich in Ser,and are often missed by ab initio gene callers. The plantazolicin from Bacillus amyloliquefaciens FZB42 is a peptide antibiotic effective against …
TIGR04188	conserved_hypothetical_protein	methyltransferase,ATP-grasp peptide maturase system. Members of this protein family are predicted SAM-dependent methyltransferases that regularly occur in the context of a putative peptide modification ATP-grasp enzyme (TIGR04187,related to enzymes of microviridin maturation) and a putative ribosomal peptide modification target (TIGR04186).
TIGR04187	conserved_hypothetical_protein	ATP-grasp ribosomal peptide maturase,SAV_5884 family. Members of this protein family are ATP-grasp ligase family enzymes that regularly occur in a contexts with a methyltransferase and a putative ribosomally translated post-translationally modified peptide precursor. Because of this conserved gene neighborhood and close sequence similarity to ATP-grasp enzymes from microviridin/marinostatin biosy…
TIGR03978	paired_radical_SAM_protein_1	His-Xaa-Ser system radical SAM maturase HxsB. This model describes the upstream member,HxsB,of a pair of uncharacterized radical SAM proteins,regularly found in the context of a small protein with four or more repeats of the tripeptide His-Xaa-Ser (HXS). This enzyme appears to be part of a peptide modification system.
pfam05952	ComX	Bacillus competence pheromone ComX. Natural genetic competence in Bacillus subtilis is controlled by quorum-sensing (QS). The ComP- ComA two-component system detects the signalling molecule ComX,and this signal is transduced by a conserved phosphotransfer mechanism. ComX is synthesized as an inactive precursor and is then cleaved and modified by ComQ before export to the extracellular environment.
TIGR04077	hypothetical_protein_HMPREF0348_0872	exported signaling peptide,YydF/SAG_2028 family. This family describes a rare family of small proteins,about 50 residues in length,that includes YydF from Bacillus subtilis and SAG_2028 from Streptococcus agalactiae 2603V/R. Mutational analysis and genomic context show that members of this family likely are modified by a (variably present) radical SAM enzyme,are exported by an ABC transporter,and…
pfam00067	p450	Cytochrome P450. Cytochrome P450s are haem-thiolate proteins involved in the oxidative degradation of various compounds. They are particularly well known for their role in the degradation of environmental toxins and mutagens. They can be divided into 4 classes,according to the method by which electrons from NAD(P)H are delivered to the catalytic site. Sequence conservation is relatively low withi…
TIGR04334	rSAM_Clo7bot	radical SAM/SPASM domain Clo7bot peptide maturase. In multiple strains of Clostridium botulinum,this single radical SAM domain protein occurs next to a tandem array of seven homologous Cys-rich small peptides (see TIGR04333). Because this radical SAM enzyme contains the SPASM domain,associated with peptide modification,it is proposed to modify all seven C. botulinum targets,hence the name Clo7bot…
TIGR04424	Microcin_B17-processing_protein_McbB	McbB family protein. This family includes the partially characterized zinc metalloprotein McbB,part of the maturase system for microcin B17,a thiazole/oxazole-modified microcin (TOMM). Other members of this family belong to very different gene neighborhoods. The Cys residues that act as zinc ligands are conserved in most members,but for rare members are jointly absent.
pfam03047	ComC	COMC family. This family consists exclusively of streptococcal competence stimulating peptide precursors,which are generally up to 50 amino acid residues long. In all the members of this family,the leader sequence is cleaved after two conserved glycine residues; thus the leader sequence is of the double- glycine type. Competence stimulating peptides (CSP) are small (less than 25 amino acid residu…
TIGR04061	hypothetical_protein_MettrDRAFT_3896	AZL_007950 family protein. This set of proteins includes PP_3335 from Pseudomonas putida,a protein of unknown function,and AZL_007950,a member of a putative biosynthetic cluster from Azospirillum sp. B510.
TIGR04280	radical_SAM_family_protein	putative geopeptide radical SAM maturase. This family is the radical SAM/SPASM domain putative peptide maturase for geopeptide,described by model TIGR04229. The SPASM domain (see model TIGR04085) frequently marks peptide-modifying radical SAM enzymes.
pfam14404	Strep_pep	Ribosomally synthesized peptide in Streptomyces species. A ribosomally synthesized peptide related to microviridin and marinostatin,usually in the gene neighborhood of one or more RimK-like ATP-grasp. The gene-context suggests that it is further modified by the ATP-grasp. The peptide is predicted to function in a defensive or developmental role,or as an antibiotic.
pfam18105	PGM1_C	PGM1 C-terminal domain. This is the C-terminal domain found in PGM1 present in Streptomyces cirratus. PGM1 is a gene product that links precursor peptides together to form the antibiotic Pheganomycin.
TIGR03793	TOMM_pelo	NHLP leader peptide domain. This model represents a domain that is conserved among a large number of putative ribosomal natural products (RNP) precursor,including the thiazole/oxazole-modified microcins (TOMMs). As a leader peptide domain,likely to be removed from the mature product,this domain is unusual in several ways. First,it is longer than most previously described RNP leader peptides. Seco…
TIGR03678	microcyclamide_precursor_protein	bacteriocin leader peptide,microcyclamide/patellamide family. This model represents a conserved N-terminal region shared by microcyclamide and patellamide bacteriocins precursors. These bacteriocin precursors are associated with heterocyclization. Related precursors are found in family TIGR04446.
pfam18047	PatG_D	PatG Domain. This is a domain found in PatG proteins,these proteins are involved in prfocessing the precursor peptide to yield the cyclic Patellamide. PatG can be found in Prochloron sp.
TIGR03895	hypothetical_protein	cyanobactin maturation protease,PatA/PatG family. This model describes a protease domain associated with the maturation of various members of the cyanobactin family of ribosomally produced,heavily modified bioactive metabolites. Members include the PatA protein and C-terminal domain of the PatG protein of Prochloron didemni,TenA and a region of TenG from Nostoc spongiaeforme var. tenue,etc.
pfam18065	PatG_C	PatG C-terminal. This is the C-terminal domain of Prochloron sp. PatG,which process the precursor peptide to yield the cyclic Patellamide. The C-terminal domain of PatG is 56% structurally homologous to the C-terminal domain of PatA.
TIGR04447	hypothetical_protein	cyanobactin cluster PatC/TenC/TruC protein. Members of this family usually are small proteins (PatC,TenC,TruC) of unknown function in cyanobactin (prenylated cyclic peptide) biosynthesis clusters,where a different small protein is a known cyanobactin precursor (patellamide,anacyclamide,piricyclamide,etc). They may instead be the C-terminal domain of a longer protein that otherwise consists mostly…
cd14243	PT-AcyF_like	Putative ABBA-type prenyltransferases acting on cyanobactins. Members of this family are found in gene clusters responsible for the production and posttranslational modification of cyanobactins,small ribosomal cyclic peptides produced by cyanobacteria. The AcyF_like proteins are structurally similar to the ABBA-type aromatic prenyltransferases,and may be responsible for the reverse- and forward-O…
TIGR04220	hypothetical_protein_L8106_29040	cyanobactin biosynthesis protein,PatB/AcyB/McaB family. Members of this protein family are small (~ 80 amino acids) and occur in biosynthesis clusters for cyanobactins,a type of ribosomal natural product,thiazole/oxazole-modified microcin (TOMM). The function of this protein family is unknown,and the recognized cyanobactin precursors (e.g. microcyclamides and patellamides) are encoded by a differ…
pfam18679	HTH_57	ThcOx helix turn helix domain. This is a winged helix turn helix domain which is found in cyanobactin oxidase ThcOx N-terminal region. The oxidase converts thiazolines to thiazoles.
TIGR04186	conserved_hypothetical_protein	putative ATP-grasp target RiPP. A RiPP is a ribosomally produced,post-translationally modified peptide. This family regularly occurs next to ATP-grasp enzymes related to those of microviridin maturation and next to a methyltransferase.
TIGR04353	hypothetical_protein_MarpuDRAFT_0194	PqqD family protein,HPr-rel-A system. Members of this protein show distant homology to PqqD,and belong to a three-gene cassette that included the HPr kinase related protein family of TIGR04352. The role of the cassette,and of this protein,are unknown.
cd16099	TenA_PqqC-like	TenA-like proteins including TenA_C and TenA_E proteins,as well as pyrroloquinoline quinone (PQQ) synthesis protein C. TenA proteins participate in thiamin metabolism and can be classified into two classes: TenA_C which has an active site Cys,and TenA_E which does not; TenA_E proteins often have a pair of structurally conserved Glu residues in the active site. TenA_C proteins (EC 3.5.99.2) cataly…
TIGR04269	radical_SAM_family_protein	radical SAM/SPASM domain protein,FxsB family. This model describes a radical SAM (pfam04055)/SPASM domain (TIGR04085) fusion subfamily distinct from PqqE,MftC,anaerobic sulfatase maturases,and other peptide maturases. The combined region described in this model can itself be fused to another domain,such as TIGR04267,or stand alone. Members occurring in the same cassette as a member of family TIGR…
TIGR04445	preny_LynF_TruF	peptide O-prenyltransferase,LynF/TruF/PatF family. Members of this family are prenytransferases that modify mostly,perhaps exclusively,ribosomally derived cyclic peptides. Note that in some cases,the natural product becomes C-prenylated through a non-enzymatic rearrangement after initial O-prenylation. Prenylated products carry names such as prenylagaramide,anacyclamide,and piricyclamide.
pfam14401	RLAN	RimK-like ATPgrasp N-terminal domain. An uncharacterized alpha+beta fold domain that is mostly fused to a RimK-like ATP-grasp and is found in bacteria and euryarchaea. Members of this family are almost always associated in gene neighborhoods with a GNAT-like acetyltransferase fused to a papain-like petidase. Additionally M20-like peptidases,GCS2,4Fe-4S Ferredoxins,a distinct metal-sulfur cluster …
COG4171	SapC	ABC-type antimicrobial peptide transport system,permease component [Defense mechanisms].
PRK15110	PRK15110	peptide ABC transporter permease SapB.
pfam11814	DUF3335	Peptidase_C39 like family.
COG4168	SapB	ABC-type antimicrobial peptide transport system,permease component [Defense mechanisms].
cd07476	Peptidases_S8_thiazoline_oxidase_subtilisin-like_protease	Peptidase S8 family domain in Thiazoline oxidase/subtilisin-like proteases. Thiazoline oxidase/subtilisin-like protease is produced by the symbiotic bacteria Prochloron spp. that inhabit didemnid family ascidians. The cyclic peptides of the patellamide class found in didemnid extracts are now known to be synthesized by the Prochloron spp. The prepatellamide is heterocyclized to form thiazole and …
TIGR04267	hypothetical_protein	HEXXH motif domain. Some proteins with this domain toward the C-terminus have an N-terminal region with a radical SAM domain (pfam04055) and a SPASM domain (TIGR04085),a combination frequently associated with peptide modification. All seed alignment members,and all family members that are not fused to a radical SAM domain,have a motif HEXXH that suggests metalloprotease activity. A role in peptid…
TIGR04053	sam_11	radical SAM protein,BA_1875 family. Members of this subfamily of the radical SAM domain superfamily show closer sequence relationships to peptide-modifying proteins of bacteriocin and PQQ biosynthesis than to other characterized radical SAM proteins. Within this subfamily,targets are likely to be diverse. [Unknown function,Enzymes of unknown specificity].
TIGR04446	anacyclamide_precursor	prenylated cyclic peptide,anacyclamide/piricyclamide family. Members of this protein family occur primarily in Cyanobacteria. They average about 50 residues in length and are the ribosomally translated precursors of peptide natural products whose modifications include cleavage,cyclization,and prenylation. Sequences are well-conserved in the N-terminal region. They are nearly invariant over the la…
pfam00733	Asn_synthase	Asparagine synthase. This family is always found associated with pfam00310. Members of this family catalyze the conversion of aspartate to asparagine.
TIGR04500	PpiC_rel_mature	putative peptide maturation system protein. Members of this protein family have a novel N-terminal sequence region. Close homologs to the C-terminal region of this protein score well to PpiC-type peptidyl-prolyl cis-trans isomerase models (see pfam00639),yet no sequence within the family scores well to such models,suggesting origin within a branch of the PpiC family but subsequent neofunctionaliz…
cd16975	HATPase_SpaK_NisK-like	Histidine kinase-like ATPase domain of two-component sensor histidine kinases similar to Bacillus subtilis SpaK and Lactococcus lactis NisK. This family includes histidine kinase-like ATPase (HATPase) domain of two-component sensor histidine kinases similar to Bacillus subtilis SpaK and Lactococcus lactis NisK. SpaK is the histidine kinase (HK) of the SpaK-SpaR two-component regulatory system (TC…
pfam18218	Spa1_C	Lantibiotic immunity protein Spa1 C-terminal domain. This is the C-terminal domain found in SpaI present in Bacillus subtilis. SpaI is an immunity lipoprotein that protects the Gram-positive bacteria against their own lantibiotics,in this case subtilin. SpaI together with the ABC transporter SpaFEG protects the membrane from subtilin insertion.
cd02425	Peptidase_C39F	A sub-family of peptidase family C39. Peptidase family C39 mostly contains bacteriocin-processing endopeptidases from bacteria. The cysteine peptidases in family C39 cleave the "double-glycine" leader peptides from the precursors of various bacteriocins (mostly non-lantibiotic). The cleavage is mediated by the transporter as part of the secretion process. Bacteriocins are antibiotic proteins secr…
cd02424	Peptidase_C39E	A sub-family of peptidase family C39. Peptidase family C39 mostly contains bacteriocin-processing endopeptidases from bacteria. The cysteine peptidases in family C39 cleave the "double-glycine" leader peptides from the precursors of various bacteriocins (mostly non-lantibiotic). The cleavage is mediated by the transporter as part of the secretion process. Bacteriocins are antibiotic proteins secr…
NF033433	NisI_immun_dup	NisI/SpaI family lantibiotic immunity lipoprotein. This HMM describes a domain that occurs twice in the nisin lantibiotic self-immunity lipoprotein NisI,and once in the subtilin lantibiotic self-immunity lipoprotein SpaI,and once or twice in numerous other known or putative lantibiotic resistance lipoproteins.
TIGR01653	hypothetical_protein	bacteriocin,lactococcin 972 family. This model represents bacteriocins related to lactococcin 972. Members tend to be found in association with a seven transmembrane putative immunity protein. [Cellular processes,Toxin production and resistance].
pfam11420	Subtilosin_A	Bacteriocin subtilosin A. Subtilosin A is a bacteriocin from Bacillus subtilis.The protein has a cyclized peptide backbone and forms three cross-liks between the sulphurs of Cys13,Cys7 and Cys4 and the alpha-positions of Phe22,Thr28 and Phe31.
pfam17312	Helveticin_J	Bacteriocin helveticin-J. Bacteriocins are biologically active proteins or protein complexes that display a bactericidal mode of action towards closely related species. Bacteriocins produced by lactic acid bacteria are grouped into different classes. Class III of bacteriocins includes large heat liable proteins. Lactobacillus helveticus 481 produces a 37-kDa bacteriocin called helveticin J which …
NF012164	AlbA	subtilosin maturase AlbA. AlbA is a radical SAM/SPASM domain-containing protein responsible for introducing thioether crosslinks during that maturation of bacteriocins such subtilosin A.
TIGR04450	Gpos_C8_like	putative immunity protein/bacteriocin. This model describes full-length proteins of Gram-positive bacteria that consist of an N-terminal signal peptide,a central region of unknown function,and a Cys-rich C-terminal region. In both the overall architecture and the apparent weak homology of the C-terminal region itself,these proteins resemble archaeal proteins such as the halocin C8 precursor. In t…
PRK00284	pqqA	pyrroloquinoline quinone precursor peptide PqqA.
TIGR03913	radical_SAM_domain_protein	Y_X(10)_GDL-associated radical SAM protein. This narrowly distributed protein family contains an N-terminal radical SAM domain. It occurs in Pseudomonas fluorescens Pf0-1,Ralstonia solanacearum,and numerous species and strains of Burkholderia. Members always occur next to a trio of three mutually homologous genes,all of which contain the domain pfam08898 as the whole of the protein (about 60 amin…
TIGR02110	Coenzyme_PQQ_synthesis_protein_F	coenzyme PQQ biosynthesis probable peptidase PqqF. In a subset of species that make coenzyme PQQ (pyrrolo-quinoline-quinone),this probable peptidase is found in the PQQ biosynthesis region and is thought to act as a protease on PqqA (TIGR02107),a probable peptide precursor of the coenzyme. PQQ is required for some glucose dehydrogenases and alcohol dehydrogenases. [Biosynthesis of cofactors,prost…
PRK05184	PRK05184	pyrroloquinoline quinone biosynthesis protein PqqB; Provisional.
PRK05157	PRK05157	pyrroloquinoline quinone biosynthesis protein PqqC; Provisional.
TIGR04133	coenzyme_PQQ_synthesis_protein_E	radical SAM enzyme,rSAM/lipoprotein system. Members of this protein family are radical SAM enzymes with an additional 4Fe4S cluster-binding C-terminal domain (TIGR04085) shared with PqqE and many other peptide and protein-modifying radical SAM enzymes. All members occur in the context of a predicted lipoprotein that usually is encoded by an adjacent gene.
TIGR03973	conserved_hypothetical_protein	six-cysteine peptide SCIFF. Members of this protein family are essentially universal in the class Clostidia and therefore highly abundant in the human gut microbiome. This short peptide is designated SCIFF,for Six Cysteines in Forty-Five residues. It is a presumed ribosomal natural product precursor,always found associated with a yet-uncharacterized radical SAM protein,family TIGR03974,that resem…
TIGR04119	Radical_SAM_domain_protein	CXXX repeat peptide maturase. This model describes a peptide maturase that works with,usually fused to,a radical SAM enzyme in a system that modifies peptides with multiple tandem repeats of CXXX sequences. This protein includes an iron-sulfur cluster binding region associated with peptide modification as described in domain model TIGR04085.
pfam13165	SCIFF	Six-cysteine peptide SCIFF. Members of this protein family are essentially universal in the class Clostidia and therefore highly abundant in the human gut microbiome. This short peptide is designated SCIFF,for Six Cysteines in Forty-Five residues. It is a presumed ribosomal natural product precursor,always found associated with a yet-uncharacterized radical SAM protein that resembles other peptid…
TIGR04333	hypothetical_protein_IYC_10989	Cys-rich peptide,Clo7bot family. Members of this protein family range in size from 34 to 53 residues,including from four to seven Cys residues. Multiple strains of Clostridium botulinum show seven tandem members upstream of a radical SAM/SPASM domain protein likely to act as a ribosomal natural product maturase. By analogy to subtilosin A,the Cys residues are likely targets for modifications that…
TIGR03977	radical_SAM_domain_protein	His-Xaa-Ser system radical SAM maturase HxsC. This model describes the downstream member,HxsC,of a pair of uncharacterized radical SAM proteins,regularly found in the context of a small protein with four or more repeats of the tripeptide His-Xaa-Ser (HXS). This enzyme appears to be part of a peptide modification system.
TIGR03903	TOMM_kin_cyc	TOMM system kinase/cyclase fusion protein. This model represents proteins of 1350 in length,in multiple species of Burkholderia,in Acidovorax avenae subsp. citrulli AAC00-1 and Delftia acidovorans SPH-1,and in multiple copies in Sorangium cellulosum,in genomic neighborhoods that include a cyclodehydratase/docking scaffold fusion protein (TIGR03882) and a member of the thiazole/oxazole modified me…
COG4403	LcnDR2	Lantibiotic modifying enzyme [Defense mechanisms].
NF033214	ComC_Streptocco	competence-stimulating peptide ComC. Members of this family are ComC,a secreted peptide that stimulates competence for natural transformation in Streptococcus. ComC peptides fall within the broader family of pfam03047,a homology family of pheromone/bacteriocin precursors that is also restricted to Streptococcus. The PF03047 HMM runs only a few residues past the GlyGly precursor peptide cleavage s…
NF033212	SapB_AmfS_lanti	SapB/AmfS family lantipeptide. Members of this family are class III lantipeptide precursors. These typically are short peptides,encoded next to the gene for the lantipeptide synthetase that creates the characteristic lanthionine (or beta-methyl lanthionine) bridges for which these natural products are named. Members of this family include SapB and AmfS,which are considered morphogens rather than …
TIGR03898	hypothetical_protein_SrosN15_20203	type 2 lantibiotic,mersacidin/lichenicidin family. This model recognizes a number of type 2 lantibiotic-type bacteriocins,including mersacidin and lichenicidin. Members often are found as gene pairs encoding two-chain bacteriocins. Maturation is accomplished,at least in part,by a LanM-type enzyme (TIGR03897). This model describes only the leader peptide region. [Cellular processes,Toxin productio…
TIGR04363	hypothetical_protein	FxLD family lantipeptide. Members of this protein family occur with a cassette of lanthionine-type peptide modification enzymes. Members are small (about 60 amino acids long),rich in Cys,and variable in copy number per genome (from one to three). These features suggest that members of this family are modified to become lantipeptides,although not necessarily a lantibiotic. There is no GlyGly cleav…
NF033400	thiazolyl_B	thiazolylpeptide-type bacteriocin.
TIGR04136	radical_SAM_domain_protein	radical SAM peptide maturase,FibroRumin system. Members of this protein family are radical SAM enzymes proposed to act on small,Cys-rich peptides encoded by tandem gene pairs. Members occur in enzymes Fibrobacter succinogenes subsp. succinogenes S85 (genes for their target peptides missed) and in Ruminococcus albus 8. This enzyme family is similar in sequence to the SCIFF (Six Cysteines in Forty-…
TIGR04261	putative_arylsulfatase_regulatory_protein	radical SAM/SPASM domain protein,GRRM system. Members of this protein family are radical SAM/SPASM domain proteins (see pfam04055 and TIGR04085) related to anaeroboic sulfatase maturating enzymes and the peptide modification enzyme PqqE. Members are found primarily in Cyanobacteria adjacent to a short protein,~150 residues,in which the last ~60 residues tends to be repetitive and highly glycine-r…
TIGR04351	hypothetical_protein_SclaA2_02770	putative TOMM peptide. Members of this family of short peptides average about 110 amino acids in length,with greatest variability in the last thirty. The conserved region resembles the alpha subunit of nitrile hydratase,as with the NHLP leader peptide domain (TIGR03793),and members usually are found near a cyclodehydratase (maturase) enzyme,marking these as like thiazole/oxazole-modified microcin…
NF033401	thiazolyl_BerA	thiocillin/thiostrepton family thiazolyl peptide. Members of this family include the precursor peptides for the antibiotics thiostrepton,nosiheptide,thiocillin,and berninamycin.
TIGR03601	B_an_ocin	bacteriocin,heterocycloanthracin/sonorensin family. Numerous bacteria encode systems for producing bacteriocins by extensive modification of ribosomally produced precursors. Members of the TOMM class (thiazole/oxazole-modified microcins) are recognizable by association with cyclodehydratase (and often dehydrogenase) maturation proteins. This family consists of a special subclass,the heterocycloan…
TIGR04157	hypothetical_protein_BACCELL_00210	glycosyltransferase,GG-Bacteroidales peptide system. Members of this protein family are predicted glycosyltransferases that occur in conserved gene neighborhoods in various members of the Bacteroidales. These neighborhoods feature a radical SAM enzyme predicted to act in peptide modification (family TIGR04148),peptides from family TIGR04149 with a characteristic GG cleavage motif,and several othe…
TIGR02108	Coenzyme_PQQ_synthesis_protein_B	coenzyme PQQ biosynthesis protein B. This model describes coenzyme PQQ biosynthesis protein B,a gene required for the biosynthesis of pyrrolo-quinoline-quinone (coenzyme PQQ). PQQ is required for some glucose dehydrogenases and alcohol dehydrogenases. Note that this gene appears to be required for PQQ in biosynthesis in Methylobacterium extorquens (under the name pqqG) and in Klebiella pneumoniae…
cd16274	PQQB-like_MBL-fold	Coenzyme pyrroloquinoline quinone (PQQ) synthesis protein B and related proteins; MBL-fold metallo hydrolase domainhydrolase domain. PQQB is essential for the synthesis of the cofactor pyrroloquinoline quinone (PQQ) in Klebsiella pneumonia. PqqB is not directly involved in the PQQ biosynthesis but may serve as a carrier for PQQ when PQQ is released from PqqC. Members of this subgroup belong to th…
NF033457	elgicin_lanti	elgicin/penisin family lantibiotic. The HMM describes the elgicin family of lantipeptides active as bacteriocins. The leader domain occurs in additional proteins that lack homology in the core region,although sharing richness in Cys residues there.
pfam04604	L_biotic_typeA	Type-A lantibiotic. Lantibiotics are antibiotic peptides distinguished by the presence of the rare thioether amino acids lanthionine and/or methyl-lanthionine. They are produced by Gram-positive bacteria as gene-encoded precursor peptides and undergo post-translational modification to generate the mature peptide. Based on their structural and functional features lantibiotics are currently divided…
NF033431	cinnamycin_RiPP	cinnamycin family lantibiotic. Members of this family are RiPP precursor peptides from which the lantibiotic cinnamycin is the most heavily studied. Mature cinnamycin is 19 amino acids long with nine post-translational modifications,including lanthionine,methyllanthionine,and lysinoalanine bridge modifications.
cd02259	Peptidase_C39_like	Peptidase family C39 mostly contains bacteriocin-processing endopeptidases from bacteria. The cysteine peptidases in family C39 cleave the "double-glycine" leader peptides from the precursors of various bacteriocins (mostly non-lantibiotic). The cleavage is mediated by the transporter as part of the secretion process. Bacteriocins are antibiotic proteins secreted by some species of bacteria that …
pfam14867	Lantibiotic_a	Lantibiotic alpha. Lantibiotics are two-component lanthionine-containing peptide antibiotics active on Gram-positive bacteria.
TIGR04451	lanti_SCO0268	lantipeptide,SCO0268 family. Members of this family are putative lantipeptide (most likely lantibiotic) precursors,about 53 amino acids long,found in a lantibiotic-type biosynthetic cluster in several species of Streptomyces (S. coelicolor,S. griseoflavus,S. ambofaciens,etc.). This family is described in AntiSMASH as Streptomyces PEQAXS motif lantipeptide precursor.
TIGR04149	predicted_protein	natural product precursor,GG-Bacteroidales family. Sequences in this protein domain family include a leader peptide region,up to and including a Gly-Gly cleavage motif,and about 15 additional residues,usually Cys-rich,from a family of predicted ribosomal natural product precursors. Many of these are associated with peptide-modifying radical SAM enzymes. The core region,up through the diglycine mo…
pfam03515	Cloacin	Colicin-like bacteriocin tRNase domain. The C-terminal region of colicin-like bacteriocins is either a pore-forming or an endonuclease-like domain. Cloacin and Pyocins have similar structures and activities to the colicins from E coli and the klebicins from Klebsiella spp. Colicins E5 and D cleave the anticodon loops of distinct tRNAs of Escherichia coli both in vivo and in vitro. The full-length…
TIGR04517	hypothetical_protein_RLEG3_02865	radical SAM family RiPP maturation amino acid epimerase. This model describes PoyD and its homologs. These are divergent putative radical SAM enzymes,with the classical CxxxCxxC motif but with few members approaching the cutoff score of pfam04055. PoyD appears responsible for catalyzing a unidirectional L-to-D epimerization of 18 the 48 residues in the core peptide of the first characterized poly…
TIGR04496	rSAM_XyeB	radical SAM/SPASM domain peptide maturase,XyeB family. Members of this family are radical SAM/SPASM domain enzymes associated with maturation of the XyeA family of GG-motif containing RiPP (Ribosomally synthesized,Post-translationally modified Peptide) natural products.
pfam03070	TENA_THI-4	TENA/THI-4/PQQC family. Members of this family are found in all the three major phyla of life: archaebacteria,eubacteria,and eukaryotes. In Bacillus subtilis,TENA is one of a number of proteins that enhance the expression of extracellular enzymes,such as alkaline protease,neutral protease and levansucrase. The THI-4 protein,which is involved in thiamine biosynthesis,is also a member of this famil…
TIGR04139	hypothetical_protein_HMPREF0765_0482	putative peptide modification target,TIGR04139 family. This model describes a rare family of small putative polypeptides,including three encoded in tandem in Sphingobacterium spiritivorum ATCC 33300,in the vicinity of a TIGR04085 protein. This pairing is conserved in Chryseobacterium gleum ATCC 35910,Kordia algicida OT-1,and other species. TIGR04085 describes a C-terminal additional 4Fe4S-binding…
COG5424	COG5424	Pyrroloquinoline quinone (Coenzyme PQQ) biosynthesis protein C [Coenzyme metabolism].
TIGR04082	Radical_SAM_domain_protein	selenobiotic family peptide radical SAM maturase. Members of this protein family are radical SAM (rSAM) enzymes similar in sequence to others with known or postulated roles in peptide modification,and regularly found adjacent to members of the GSU_1558 peptide family described by model TIGR04081. GSU_1558 and several other members of that family appear to be selenoproteins,hence the term selenobi…
cd04794	euk_LANCL	Eukaryotic Lanthionine synthetase C-like protein. This family contains the lanthionine synthetase C-like proteins 1 and 2 which are related to the bacterial lanthionine synthetase components C (LanC). LANCL1 and LANCL2 (testes-specific adriamycin sensitivity protein) were thought to be peptide-modifying enzyme components in eukaryotic cells. Both proteins are produced in large quantities in the b…
TIGR04251	SCM_rSAM_ScmF	SynChlorMet cassette radical SAM/SPASM protein ScmF. A biosynthesis cassette found in Syntrophobacter fumaroxidans MPOB,Chlorobium limicola DSM 245,Methanocella paludicola SANAE,and delta proteobacterium NaphS2 contains two PqqE-like radical SAM/SPASM domain proteins,a PqqD homolog,and a conserved hypothetical protein. These components suggest modification of a ribosomally produced peptide precur…
TIGR02109	Coenzyme_PQQ_synthesis_protein_E	coenzyme PQQ biosynthesis enzyme PqqE. This model describes coenzyme PQQ biosynthesis protein E,a prototypical peptide-cyclizing radical SAM enzyme. It links a Tyr to a Glu as the first step in the biosynthesis of pyrrolo-quinoline-quinone (coenzyme PQQ) from the precursor peptide PqqA. PQQ is required for some glucose dehydrogenases and alcohol dehydrogenases. [Biosynthesis of cofactors,prosthet…
TIGR02107	Coenzyme_PQQ_synthesis_protein_A	coenzyme PQQ precursor peptide PqqA. This model describes a very small protein,coenzyme PQQ biosynthesis protein A,which is smaller than 25 amino acids in many species. It is proposed to serve as a peptide precursor of coenzyme pyrrolo-quinoline-quinone (PQQ),with Glu and Tyr of a conserved motif Glu-Xxx-Xxx-Xxx-Tyr becoming part of the product. [Biosynthesis of cofactors,prosthetic groups,and ca…
TIGR04079	hypothetical_protein_SMSK564_1567	KxxxW-cyclized secreted peptide. Members of this family are short precursor peptides in which the mature form undergoes a cyclization between a Lys and a Trp four residues away. The modification enzyme appears to be an adjacent encoded radical SAM protein. Genomes encoding this system include Streptococcus thermophilus LMD-9 and Lactococcus lactis subsp. cremoris MG1363,among others. [Cellular pr…
TIGR04080	rSAM_pep_cyc	KxxxW cyclic peptide radical SAM maturase. Members of this family are radical SAM enzymes that appear to perform a cyclization on an adjacent cognate peptide from family TIGR04079. Genomes with the complete system include Streptococcus thermophilus LMD-9 and Lactococcus lactis subsp. cremoris MG1363,among others. The gene symbol assigned is kwcM,for KxxxW Cyclic peptide Maturase. [Protein fate,Pr…
TIGR04403	synthesis_of_sporulation_killing_factor_A	sporulation killing factor system radical SAM maturase. Members of this family are a radical SAM enzyme of post-translational modification of ribosomally translated peptides. In Bacillus subtilis,the enzyme SkfB creates a sactipeptide (sulfur-to-alpha-carbon) crosslink of Cys-4 to Met-12 of the mature form of sporulation killing factor (SkfA). In Paenibacillus larvae subsp. larvae B-3650,the Met …
TIGR04404	hypothetical_protein_PlarlB_23158	sporulation killing factor. Members of this family are ribosomally synthesized and post-translationally modified peptide natural products,modified by sulfur-to-alpha-carbon cross-link introduced by a radical SAM enzyme,SkfB (TIGR04403).
TIGR04150	conserved_hypothetical_protein	pseudo-rSAM protein,GG-Bacteroidales system. Many peptide-modifying radical SAM enzymes have two 4Fe4S-binding regions,an N-terminal one recognized by Pfam radical SAM domain-defining model pfam04055 and a C-terminal one recognized by TIGR04085. Members of this protein family occur in cassettes with such a radical SAM family (TIGR04148) and with a peptide modification target (TIGR04149). Surprisi…
TIGR04118	hypothetical_protein_CpapDRAFT_0305	modification target Cys-rich peptide,AC3_0185 family. Radical SAM enzyme family TIGR04115 is paired with a number of short peptides with multiple tandem repeats of Cys-Xaa-Xaa-Xaa (see TIGR04114). This family represent a peptide family with a TIGR04114-like region,although the repeat region is relatively short in this group.
pfam08130	Antimicrobial18	Type A lantibiotic family. This family consists of the type A lantibiotic peptides. Both Pep5 and epicidin-280 are ribosomally-synthesized antimicrobial peptides produced by Gram-positive bacteria that are characterized by the presence of lanthionine and/or methyllanthionine residues. The lantibiotics family has a highly specific activity against multi- drug resistant bacteria and has potential t…
cd02420	Peptidase_C39D	A sub-family of peptidase family C39. Peptidase family C39 mostly contains bacteriocin-processing endopeptidases from bacteria. The cysteine peptidases in family C39 cleave the "double-glycine" leader peptides from the precursors of various bacteriocins (mostly non-lantibiotic). The cleavage is mediated by the transporter as part of the secretion process. Bacteriocins are antibiotic proteins secr…
pfam11632	LcnG-beta	Lactococcin G-beta. This family of proteins is LcnG-beta,which with LcnG-alpha constitute the two-peptide bacteriocin lactococcin G (LcnG). This family of proteins represents the N terminal domain which has an alpha-helical structure and is amphiphilic. Both peptides have a GxxxG motif which they use for interaction through a helix-helix structure.
pfam08129	Antimicrobial17	Alpha/beta enterocin family. This family consists of the alpha and beta enterocins and lactococcin G peptides. These peptides have some antimicrobial properties; they inhibit the growth of Enterococcus spp. and a few other gram-positive bacteria. These peptides act as pore- forming toxins that create cell membrane channels through a barrel-stave mechanism and thus produce an ionic imbalance in th…
cd18569	ABC_6TM_NHLM_bacteriocin	Six-transmembrane helical domain (6-TMD) of NHLP family bacteriocin export ABC transporters. This group includes the six-transmembrane helical domain (6-TMD) of the ABC subunit of NHLM (Nitrile Hydratase Leader Microcin) bacteriocin system,which contains ABC transporter (permease/ATP-binding fused protein) with a peptidase domain. ABC-transporter proteins in this group are predicted to be a subun…
TIGR03795	RNP_Burkhold	ribosomal natural product,two-chain TOMM family. Members of this protein family are found sparsely,mostly in members of the genus Burkholderia. Members often occur as tandem homologous genes,such as BMA_0021 and BMA_0022 in Burkholderia mallei ATCC 23344,or else have a duplication. The genes regularly are encoded near a cyclodehydrogenase/docking protein fusion protein of TOMM (thiazole/oxazole-m…
TIGR04311	Radical_SAM_domain_protein	putative metalloenzyme radical SAM/SPASM domain maturase. This model describes a family of radical SAM/SPASM enzymes largely from the deltaproteobacteria. The family is most closely related to radical SAM enzyme family regularly in archaea in the vicinity of tungsten-containing oxidoreductases. A single member of the family in archaea may correspond to multiple tungsten enzymes,e.g. five in Pyroc…
TIGR04276	conserved_hypothetical_protein	FxsC C-terminal domain. This model describes a sequence region found regularly as the C-terminal domain of a protein (where the N-terminal domain resembles a TIR domain - see pfam13676) in the vicinity of a proposed peptide-modifying radical SAM/SPASM domain protein,FxsB (TIGR04269).
cd02421	Peptidase_C39_likeD	A sub-family of peptidase family C39. Peptidase family C39 mostly contains bacteriocin-processing endopeptidases from bacteria. The cysteine peptidases in family C39 cleave the "double-glycine" leader peptides from the precursors of various bacteriocins (mostly non-lantibiotic). The cleavage is mediated by the transporter as part of the secretion process. Bacteriocins are antibiotic proteins secr…
TIGR04249	SCM_chp_ScmC	SynChlorMet cassette protein ScmC. A biosynthesis cassette found in Syntrophobacter fumaroxidans MPOB,Chlorobium limicola DSM 245,Methanocella paludicola SANAE,and delta proteobacterium NaphS2 contains two PqqE-like radical SAM/SPASM domain proteins,a PqqD homolog,and a conserved hypothetical protein. These components suggest modification of a ribosomally produced peptide precursor,but the precur…
TIGR04503	mft_etfB	electron transfer flavoprotein,mycofactocin-associated. Members of this small protein family are putative electron transfer flavoproteins,related to FixA from E. coli and EtfB from Methylophilus methylotrophus but clearly forming a distinctive clade. All members occur in species with a mycofactocin system. We have proposed that mycofactocin is a redox carrier synthesized from a ribosomally transl…
cd02417	Peptidase_C39_likeA	A sub-family of peptidase C39 which contains Cyclolysin and Hemolysin processing peptidases. Peptidase family C39 mostly contains bacteriocin-processing endopeptidases from bacteria. The cysteine peptidases in family C39 cleave the "double-glycine" leader peptides from the precursors of various bacteriocins (mostly non-lantibiotic). The cleavage is mediated by the transporter as part of the secre…
TIGR04495	RiPP_XyeA	putative rSAM-modified RiPP,XyeA family. Members of this family are short polypeptides with a conserved GG motif as found in bacteriocins that are cleaved upon export. Each gene occurs immediately upstream of a gene for a peptide-modifying radical SAM/SPASM domain protein. The system is designated Xye for genera Xenorhabdus,Yersinia,and Erwinia,hence XyeA for the precursor peptide. The vicinity w…
TIGR04084	rSAM_AF0577	putative peptide-modifying radical SAM enzyme,AF0577 family. This radical SAM family contains a C-terminal region motif CXXCX5CX3C that is found in PqqE and other radical SAM enzymes that act on peptide substrates. Members of this family are found primarily in the Archaea,but also several eukaryotes (Trichomonas vaginalis G3,Entamoeba dispar SAW760,Giardia intestinalis ATCC 50581,etc.). The funct…
TIGR04305	TENA/THI-4_family_protein	putative folate metabolism protein,CADD family. This protein family,related to but outside the family of PqqC proteins involved in PQQ biosynthesis,includes the well-studied Chlamydia protein CADD (Chlamydia protein Associating with Death Domains),which can induce apoptosis in a host cell. Other members of this family occur in Rickettsia and Wolbachia,unrelated in terms of phylogeny (both are alp…
TIGR04511	SagB_rel_DH_2	putative peptide maturation dehydrogenase. Members resemble the peptide maturation dehydrogenase SagB of thiazole and oxazole modification systems,and occur in a what appears to be a new type of peptide modification system. One adjacent marker is a new type of nitrile hydratase alpha subunit-related putative precursor,TIGR04509,distantly related the NHLP leader peptide family TIGR03793. Another i…
TIGR04069	hypothetical_protein	peptide maturation system acyl carrier-related protein. Both PSI-BLAST and large numbers of noise-level HMM hits show a relationship between this family and the phosphopantetheine attachment site domain modeled by pfam00550. That domain includes acyl carrier proteins (ACP) and features an essentially invariant serine residue that is the attachment site for the phosphopantetheine prosthetic group.…
pfam11758	Bacteriocin_IIi	Aureocin-like type II bacteriocin. This is a small family of type II bacteriocins usually encoded on a plasmid. Characteristically the members are small,cationic,rich in Lys and Try,and bring about a generalized membrane permeabilisation leading to leakage of ions. The family includes aureocin A,lacticins Q and Z,and BhtB as well as an archaeal member.
NF033417	glycocin_F_RiPP	glycocin F family RiPP peptide. Glycocin F,from Lactobacillus plantarum strain KW30,represents one of the rarer known classes of ribosomally translated,post-translationally modified peptide (RiPP) antibiotics. Members of the family are glycosylated,which is uncommon among RiPP natural products.
NF033415	thiovirid_RiPP	thioviridamide family RiPP peptide. Thioviridamide represents one of the rarer known classes of ribosomally translated,post-translationally modified peptide (RiPP) antibiotics.
TIGR04164	hypothetical_protein_Pcar_3203	modified peptide precursor CbpA. Members of this family are short peptides predicted to reach mature form after modification by a radical SAM enzyme (TIGR04163).
TIGR04248	SCM_PqqD_rel	SynChlorMet cassette protein ScmD. A biosynthesis cassette found in Syntrophobacter fumaroxidans MPOB,Chlorobium limicola DSM 245,Methanocella paludicola SANAE,and delta proteobacterium NaphS2 contains two PqqE-like radical SAM/SPASM domain proteins,a PqqD homolog,and a conserved hypothetical protein. These components suggest modification of a ribosomally produced peptide precursor,but the precur…
pfam14408	Actino_peptide	Ribosomally synthesized peptide in actinomycetes. Ribosomally synthesized peptide that is usually in the gene neighborhood of a RimK-like ATP-grasp and an aspartyl-O-methylase. Gene contexts suggest that it is further modified by the ATP-grasp and the methylase. It might function in defense or development,or as a peptide antibiotic.
TIGR04321	hypothetical_protein_TresaDRAFT_0163	spiro-SPASM protein. This three-domain protein is restricted to the spirochetes and widely distributed (excepting Borrelia). It has a conserved C-terminal SPASM domain,a 4Fe-4S binding domain shared by a number of peptide-modifying and heme-modifying radical SAM proteins. It has a central radical SAM domain,although half the members have lost the signature 4Fe-4S-binding Cys residues,fail to regi…
TIGR04135	hypothetical_protein_CUS_2485	Cys-rich radical SAM target,FibroRumin family. Members of this protein family are cysteine-rich small peptides,about 52 amino acids long,that are proposed targets for modification by a radical SAM enzyme. Known occurrences are as tandem gene pairs Fibrobacter succinogenes subsp. succinogenes S85 (missed gene calls) and in Ruminococcus albus 8.
NF033403	linaridin_rel	linaridin-like RiPP. Members of this family share N-terminal (leader peptide) sequence with the linaridin family of ribosomally translated,post-translationally modified natural product precursors.
pfam08109	Antimicrobial14	Lactocin 705 family. This family consists of lactocin 705 which is a bacteriocin produced by Lactobacillus casei CRL 705. Lactocin 705 is a class IIb bacteriocin,whose activity depends upon the complementation of two peptides (705-alpha and 705-beta) of 33 amino acid residues each. Lactocin 705 is active against several Gram-positive bacteria,including food-borne pathogens and is a good candidate…
TIGR03602	streptolysinS	bacteriocin protoxin,streptolysin S family. Members of this family are bacteriocin precursors. These small,ribosomally produced polypeptide precursors are extensively processed post-translationally. This family belongs to a class of heterocycle-containing bacteriocins,including streptolysin S from Streptococcus pyogenes,and related bacteriocins from Streptococcus iniae and Clostridium botulinum. …
TIGR04194	hypothetical_protein_M23134_00169	grasp-with-spasm leader A domain. This model describes the leader peptide domain,ending in a Gly-Gly cleavage motif,for a post-ribosomal natural product (PRNP) precursor. The corresponding modification enzymes include an ATP-GRASP enzyme and a SPASM-domain protein,related to the C-terminal region of numerous peptide-modification radical SAM enzymes.
cd19370	TenA_PqqC	TenA_like proteins,including PqqC and CADD. This family contains proteins with similarity to TenA,and includes bacterial coenzyme pyrroloquinoline quinone (PQQ) synthesis protein C or PQQC proteins. PQQ is the prosthetic group of several bacterial enzymes,including methanol dehydrogenase of methylotrophs and the glucose dehydrogenase of a number of bacteria. PQQC catalyzes the last step of PQQ bi…
PRK13944	PRK13944	protein-L-isoaspartate O-methyltransferase; Provisional.
TIGR04449	halocin_C8_dom	halocin C8-like bacteriocin domain. This model describes the 76-amino C-terminal domain of the halocin C8 precursor that actually becomes the mature bacteriocin halocin C8 after export and cleavage,as well as homologous C-terminal regions from many other archaea. Surprisingly,this Cys-rich region occurs also in many strains of Staphylococcus epidermidis. Gene regions do not provide evidence for p…
pfam13471	Transglut_core3	Transglutaminase-like superfamily. This family includes uncharacterized proteins that are related to the transglutaminase like domain pfam01841.
TIGR04511	SagB_rel_DH_2	putative peptide maturation dehydrogenase. Members resemble the peptide maturation dehydrogenase SagB of thiazole and oxazole modification systems,and occur in a what appears to be a new type of peptide modification system. One adjacent marker is a new type of nitrile hydratase alpha subunit-related putative precursor,TIGR04509,distantly related the NHLP leader peptide family TIGR03793. Another i…
TIGR04069	hypothetical_protein	peptide maturation system acyl carrier-related protein. Both PSI-BLAST and large numbers of noise-level HMM hits show a relationship between this family and the phosphopantetheine attachment site domain modeled by pfam00550. That domain includes acyl carrier proteins (ACP) and features an essentially invariant serine residue that is the attachment site for the phosphopantetheine prosthetic group.…
COG4767	VanZ	Glycopeptide antibiotics resistance protein [Defense mechanisms].
TIGR03798	ocin_TIGR03798	nif11-like leader peptide domain. This model describes a conserved,fairly long (about 65 residue) leader peptide region for a family of putative ribosomal natural products (RNP) of small size. Members of the seed alignment tend to have the Gly-Gly motif as the last two residues of the matched region. This is a cleavage site for a combination processing/export ABC transporter with a peptidase doma…
pfam00069	Pkinase	Protein kinase domain.
NF033471	J25_fam_lasso	acinetodin/klebsidin/J25 family lasso peptide. Members of this family include precursors of at least three lasso peptides,namely microcin J25,acinetodin and klebsidin. All members of the family are encoded as neighboring genes to homologs of the processing protein genes mcjB,mcjC,and mcjD.
TIGR03979	His_Ser_Rich	His-Xaa-Ser repeat protein HxsA. Members of this protein share two defining regions. One is a histidine/serine-rich cluster,typically H-R-S-H-S-S-H-R-S-H-S-S-H. Members are found always in the context of a pair of radical SAM proteins,HxsB and HxsC,and a fourth protein HxsD. The system is predicted to perform peptide modifications,likely in the His-Xaa-Ser region,to produce some uncharacterized n…
NF033400	thiazolyl_B	thiazolylpeptide-type bacteriocin.
TIGR04013	Radical_SAM_domain_protein	B12-binding domain/radical SAM domain protein,MJ_1487 family. Members of this family have both a B12 binding homology domain (pfam02310) and a radical SAM domain (pfam04055),and occur only once per genome. Some species with members of this family have a related protein with similar domain architecture. This protein is occurs largely in archaeal methanogens but also in a few bacteria,including The…
TIGR04196	putative_lipoprotein	glycopeptide,sublancin family. Members of this family,including sublancin,are post-ribosomal natural products (PRNP) with an S-linked glycosylation. Sublancin itself also has two disulfide bonds. A related gene cluster in Bacillus cereus E33L includes the four Cys involved in the disulfide cluster but lacks the region with the glycosylated Cys,and have been excluded.
pfam14407	Frankia_peptide	Ribosomally synthesized peptide prototyped by Frankia Franean1_4349. Ribosomally synthesized peptide linked to cyclases in chloroflexi. It may have a link to cyclic nucleotide signaling.
TIGR04341	hypothetical_protein_HMPREF9457_01855	ACGX-repeat peptide. Members of this family average 75 amino acids in length and average six instances of the motif ACGX,where X is A,S,or T. Members are proposed target sequences for modification by adjacent radical SAM/SPASM domain proteins (family TIGR04340). Cys residues adjacent to Gly residues are common as proposed sites for modification by radical SAM enzymes.
TIGR04134	hypothetical_protein	putative lipoprotein,rSAM/lipoprotein system. Members of this family are Bacteroidetes lineage putative lipoproteins that always occur in pairs with a radical SAM enzyme,TIGR04133,from a branch of the radical SAM superfamily in which many members perform peptide or protein modifications. In some members,the region distal to the Cys of the putative lipoprotein cleavage motif is duplicated.
TIGR04163	rSAM_cobopep	peptide-modifying radical SAM enzyme CbpB. Members of this family are radical SAM enzymes that modify a short peptide encoded by an upstream gene. A role in metal chelation is suggested.
TIGR04268	FxSxx-COOH	FXSXX-COOH protein. Members of this family are very short (~60 residue) polypeptides,among which the fifth and third to last residues are nearly always Phe and Ser,respectively. Because members occur in a conserved context with a putative peptide-modifying radical SAM/SPASM domain protein,we suggest that members of this family may be the modification target. The gene symbol fxsA reflects both the…
TIGR04497	GRASP_targ_2	putative ATP-grasp target RiPP. Members of this small family are putative RiPP (Ribosomally translated,Post-translationally modified Peptides) precursors,modified by RimK-like ATP-grasp proteins. Members are encoded near both an ATP-grasp protein and C39 peptidase domain-containing transporter. Members are short polypeptides that contain the GG motif expected for cleavage on export.
cd01991	Asn_Synthase_B_C	The C-terminal domain of Asparagine Synthase B. This domain is always found associated n-terminal amidotransferase domain. Family members that contain this domain catalyse the conversion of aspartate to asparagine. Asparagine synthetase B catalyzes the assembly of asparagine from aspartate,Mg(2+)ATP,and glutamine. The three-dimensional architecture of the N-terminal domain of asparagine synthetas…
TIGR04250	SCM_rSAM_ScmE	SynChlorMet cassette radical SAM/SPASM protein ScmE. A biosynthesis cassette found in Syntrophobacter fumaroxidans MPOB,Chlorobium limicola DSM 245,Methanocella paludicola SANAE,and delta proteobacterium NaphS2 contains two PqqE-like radical SAM/SPASM domain proteins,a PqqD homolog,and a conserved hypothetical protein. These components suggest modification of a ribosomally produced peptide precur…
TIGR04510	mod_pep_cyc	putative peptide modification system cyclase. Members of this family show homology to mononucleotidyl cyclases and to tetratricopeptide repeat (TPR) proteins. Members occur in next to two other markers of ribosomal peptide modification systems. One is a dehydrogenase related to SagB proteins from thiazole/oxazole modification systems. The other is the putative precursor,related to the nitrile hyd…
PRK02079	PRK02079	pyrroloquinoline quinone biosynthesis peptide chaperone PqqD.
NF033456	RiPP_CCRG-2	CCRG-2 family RiPP. This model consists of the conserved leader peptide domain of CCRG-2 family ribosomal peptide natural products (RiPPs),up to the Gly-Gly presumptive cleavage site,plus one additional residue (hydrophobic,or another Gly). Members are found almost exclusively in the genus Prochlorococcus,in multiple instances per genome.
TIGR03892	hypothetical_protein	thiazolylpeptide-type bacteriocin precursor. Members of this protein family are the precursors of a family of small bacteriocins (i.e. microcins) with thiopeptide type modifications,a highly modified subclass of heterocycle-containing peptide antibiotics. Members tend to be found clustered in genomes with proteins recognized by TIGR03891 and proteins/domains annotated as lantibiotic dehydratase (…
pfam12559	Inhibitor_I10	Serine endopeptidase inhibitors. This family includes both microviridins and marinostatins. It seems likely that in both cases it is the C-terminus which becomes the active inhibitor after post-translational modifications of the full length,pre-peptide. it is the ester linkages within the key,12-residue. region that circularize the molecule giving it its inhibitory conformation.
cd18571	ABC_6TM_peptidase_like	Six-transmembrane helical domain (6-TMD) of an uncharacterized peptidase ABC transporter and similar proteins. This group includes the 6-TMD of an uncharacterized peptidase-containing ABC transporter of T1SS (type 1 secretion systems),similar to heterocyst differentiation protein HetC. HetC is involved in early regulation of heterocyst differentiation in the filamentous cynobacterium Anabaena sp.…
cd18567	ABC_6TM_CvaB_RaxB_like	Six-transmembrane helical domain (6-TMD) of the ABC transporter subunit of the type 1 secretion systems,CvaB and RaxB,and similar proteins. This group represents the six-transmembrane helical domain (6-TMD) of the peptidase-containing ABC transporter subunit of T1SS (Type 1 secretion systems),such as Escherichia coli colicin V secretion/processing ATP-binding protein CvaB and putative ABC transpo…
pfam11814	DUF3335	Peptidase_C39 like family.
cd18567	ABC_6TM_CvaB_RaxB_like	Six-transmembrane helical domain (6-TMD) of the ABC transporter subunit of the type 1 secretion systems,CvaB and RaxB,and similar proteins. This group represents the six-transmembrane helical domain (6-TMD) of the peptidase-containing ABC transporter subunit of T1SS (Type 1 secretion systems),such as Escherichia coli colicin V secretion/processing ATP-binding protein CvaB and putative ABC transpo…
TIGR03890	hypothetical_protein_WH5701_11654	nif11 domain/cupin domain protein. Members of this protein family occur exclusively in the Cyanobacteria and contain both a nif11 and a cupin domain. The function is unknown.
TIGR03989	Zn-dependent_alcohol_dehydrogenase_class_III	NDMA-dependent alcohol dehydrogenase,Rxyl_3153 family. This model describes a clade within the family pfam00107 of zinc-binding dehydrogenases. The family pfam00107 contains class III alcohol dehydrogenases,including enzymes designated S-(hydroxymethyl)glutathione dehydrogenase and NAD/mycothiol-dependent formaldehyde dehydrogenase. Members of the current family occur only in species that contain…
TIGR03970	Rv0697	dehydrogenase,Rv0697 family. This model describes a set of dehydrogenases belonging to the glucose-methanol-choline oxidoreductase (GMC oxidoreductase) family. Members of the present family are restricted to Actinobacterial genome contexts containing also members of families TIGR03962 and TIGR03969 (the mycofactocin system),and are proposed to be uniform in function.
pfam04369	Lactococcin	Lactococcin-like family. Family of bacteriocins from lactic acid bacteria.
cd18556	ABC_6TM_McjD_like	Six-transmembrane helical domain of the antibacterial peptide ATP-binding cassette transporter McjD and similar proteins. This group represents the 6-TM subunit of the ABC transporter McjD that exports the antibacterial peptide microcin J25,which is an antimicrobial peptide produced by Enterobacteriaceae against other microorganisms for survival under nutrient starvation. Thus,the ABC exporter Mc…
TIGR04509	mod_pep_NH_fam	putative modified peptide. Members of this family average 110 residues in length,with strong N-terminal homology to both the nitrile hydratase (NH) alpha subunit and family TIGR03793 of NH-related ribosomally translated natural product precursors. A neighboring gene resembles SagB,the dehydrogenase of many thiazole and oxazole modified peptide systems,supporting the hypothesis that members of thi…
cd18568	ABC_6TM_HetC_like	Six-transmembrane helical domain (6-TMD) of the ABC subunit of T1SS-like HetC and similar proteins. This group represents the six-transmembrane helical domain (6-TMD) of the ABC subunit of T1SS (type 1 secretion systems),such as heterocyst differentiation protein HetC. HetC is similar to ABC protein exporters of T1SS (type 1 secretion systems) and is involved in early regulation of heterocyst dif…
TIGR04347	pseudo_SAM_Halo	pseudo-rSAM protein/SPASM domain protein. Members of this family all have a C-terminal SPASM domain (see model TIGR04085),a region usually found as a C-terminal second 4Fe-4S domain of radical SAM domain (see pfam04055) proteins. A majority of rSAM/SPASM proteins modify ribosomally produced peptides. In a few members of this family,the key Cys residues of the radical SAM domain have been lost,mak…
TIGR04083	rSAM_pep_methan	putative peptide-modifying radical SAM enzyme,Mhun_1560 family. Members of this family are radical SAM enzymes,homologous to a variety of other peptide-modifying radical SAM,and found primarily in methanogenic archaea.
TIGR04260	hypothetical_protein	rSAM-associated Gly-rich repeat protein. Members of this protein family average 125 in length,roughly half of which is the repetitive and extremely Gly-rich C-terminal region. Virtually all members occur in the Cyanobacteria,in a neighborhood that includes a radical SAM/SPASM domain,often a marker of peptide modification systems.
TIGR04165	conserved_hypothetical_protein	Cys-rich peptide,TIGR04165 family. Members of this small peptide family occur strictly in a subset of archaeal methanogens. Members have four invariant Cys residues in two Cys-Xaa-Xaa-Cys-Gly motifs and may have other Cys residues as well. At least two members occur next to family TIGR04083 radical SAM enzymes predicted to act in peptide or protein modification.
PRK00284	pqqA	pyrroloquinoline quinone precursor peptide PqqA.
pfam11814	DUF3335	Peptidase_C39 like family.
NF033432	ThioGly_TfuA_rel	TfuA-related McrA-glycine thioamidation protein.
PRK02079	PRK02079	pyrroloquinoline quinone biosynthesis peptide chaperone PqqD.

## Sheet: Supplementary Data 3
RiPP family	contigs/genomes	description	sequence	RiPP class	PTM	source
family1	2014642003.a___2014674687	2014642003.a___2014674687_2 # 471 # 602 # 1 # ID=4376_2;partial=00;start_type=ATG;rbs_motif=AGGAG;rbs_spacer=5-10bp;gc_cont=0.568	MTFENARLSLVTAELDGQDHLVSGGCNTVDLASEFGTPLNVCN	LANTHIPEPTIDE	/	metagenome
family2	2156126005_1	2156126005.a___TCCM__contig00048_7 # 5495 # 5710 # -1 # ID=64789_7;partial=00;start_type=ATG;rbs_motif=AGGA;rbs_spacer=5-10bp;gc_cont=0.310	MQEPEQKQLFTELNLEESTIINGGYNENYQYHRTFLGFQLCPRSYYSDNRYSLDYKRYNSNYYKGNRRGYY	OTHER	ptm	metagenome
family2	3300005722.a___Ga0074281_100121	3300005722.a___Ga0074281_100121_8 # 16908 # 17123 # 1 # ID=121_8;partial=00;start_type=ATG;rbs_motif=AGGA;rbs_spacer=5-10bp;gc_cont=0.310	MQEPEQEQLFTELNLEESTIINGGYNENSQYHRTFLGFQLCPRSYYSYNRYSLDYKRYNSNYYKGNIRGYY	OTHER	ptm	metagenome
family2	TARA_IOS_50_MAG_00050	TARA_IOS_50_MAG_00050_000000000793_1 # 79 # 294 # -1 # ID=179519_1;partial=00;start_type=ATG;rbs_motif=AGGA;rbs_spacer=5-10bp;gc_cont=0.315	MQEPEQEQLFTELNLEESTIINGGYNENSQYHRTFLGFQLCPRSYYSYNRYSLDYKRYNSNYYKGSIRGYY	OTHER	/	metagenome
family2	TARA_MED_95_MAG_00101	TARA_MED_95_MAG_00101_000000000527_6 # 4270 # 4485 # -1 # ID=200759_6;partial=00;start_type=ATG;rbs_motif=GGAG/GAGG;rbs_spacer=5-10bp;gc_cont=0.315	MQESQQQQLFTELNLEESTTINGGYNDNYQDYRSFLGFQLCPRSYDGYNRYSPDYKRYNSNYYKGNTRGYY	rSAM_MODIFIED_RiPP	ptm	metagenome
family2	TARA_AOS_82_MAG_00025	TARA_AOS_82_MAG_00025_000000000250_6 # 4255 # 4470 # -1 # ID=250_6;partial=00;start_type=ATG;rbs_motif=None;rbs_spacer=None;gc_cont=0.278	MQESQQQQLFTELNLEESTTINGGYNENYQYHRSFLGIQICPRSYYDYYRYSPDYKRYNSNYYKGNIRGYY	OTHER	ptm	metagenome
family2	TARA_AOS_82_MAG_00025	TARA_AOS_82_MAG_00025_000000000250_6 # 4255 # 4470___-1___ID=70_6;partial=00;start_type=ATG;rbs_motif=None;rbs_spacer=None;gc_cont=0.278	MQESQQQQLFTELNLEESTTINGGYNENYQYHRSFLGIQICPRSYYDYYRYSPDYKRYNSNYYKGNIRGYY	OTHER	ptm	metagenome
family3	2156126005_1	2156126005.a___TCCM__contig00522_3 # 2067 # 2177 # -1 # ID=72019_3;partial=00;start_type=ATG;rbs_motif=AAAA;rbs_spacer=4bp;gc_cont=0.324	MDKMKQDIEQRIELLDIKAKKWLKPLSVEFYSTFEC	LANTHIPEPTIDE	/	metagenome
family4	3300000141.a___LPjun08P41300mDRAFT_c1003955	3300000141.a___LPjun08P41300mDRAFT_c1003955_2 # 774 # 902 # -1 # ID=1187_2;partial=00;start_type=ATG;rbs_motif=TAAA;rbs_spacer=14bp;gc_cont=0.380	MQQKLSHKRVLSIAIPIVLSNATIPILGVVDTAVIGQLGQER	OTHER	/	metagenome
family4	3300000263.a___LP_A_09_P04_1000DRAFT_1002298	3300000263.a___LP_A_09_P04_1000DRAFT_1002298_2 # 1250 # 1378 # 1 # ID=53255_2;partial=00;start_type=ATG;rbs_motif=TAAA;rbs_spacer=14bp;gc_cont=0.388	MQQKLSHKRVLSIAIPIVLSNATIPILGVVDTAVIGQLGQER	OTHER	/	metagenome
family4	3300021065.a___Ga0206686_1000195	3300021065.a___Ga0206686_1000195_13 # 12117 # 12245 # -1 # ID=195_13;partial=00;start_type=ATG;rbs_motif=TAAA;rbs_spacer=14bp;gc_cont=0.380	MQQKLSHKRVLSIAIPIVLSNATIPILGVVDTAVIGQLGQER	OTHER	/	metagenome
family5	3300000155.a___SI36aug09_200mDRAFT_c1001428	3300000155.a___SI36aug09_200mDRAFT_c1001428_1 # 154 # 261 # -1 # ID=715_1;partial=00;start_type=ATG;rbs_motif=AGGAG;rbs_spacer=5-10bp;gc_cont=0.380	MSNPDITTLKEKLKNIPIPRPRTIDWCDEYPTSYV	rSAM_MODIFIED_RiPP	/	metagenome
family6	3300000148.a___SI47jul10_100mDRAFT_c1015104	3300000148.a___SI47jul10_100mDRAFT_c1015104_2 # 330 # 452 # 1 # ID=136515_2;partial=00;start_type=ATG;rbs_motif=GGxGG;rbs_spacer=3-4bp;gc_cont=0.667	MTALDGRDVAGPEEEPEARTLASIDEVGAWWVLGRCCGVG	OTHER	/	metagenome
family7	3300000149.a___LPaug09P1610mDRAFT_c1000802	3300000149.a___LPaug09P1610mDRAFT_c1000802_2 # 932 # 1033 # 1 # ID=241_2;partial=00;start_type=ATG;rbs_motif=AAAAA;rbs_spacer=9bp;gc_cont=0.216	MTKKRKNELKMIKKKAKNDQKIAFFNFCYRDII	rSAM_MODIFIED_RiPP	/	metagenome
family8	3300000150.a___SI48aug10_120mDRAFT_c1002155	3300000150.a___SI48aug10_120mDRAFT_c1002155_1 # 155 # 223 # 1 # ID=647_1;partial=00;start_type=ATG;rbs_motif=GGA/GAG/AGG;rbs_spacer=5-10bp;gc_cont=0.348	MIADVMVIYTNQPALAGGCCVD	OTHER	/	metagenome
family8	3300000171.a___SI47jul10_200mDRAFT_c1003074	3300000171.a___SI47jul10_200mDRAFT_c1003074_3 # 2606 # 2674 # 1 # ID=100775_3;partial=00;start_type=ATG;rbs_motif=GGA/GAG/AGG;rbs_spacer=5-10bp;gc_cont=0.348	MIADVMVIYTNQPALAGGCCVD	OTHER	/	metagenome
family8	3300000164.a___SI39no09_200mDRAFT_c1004029	3300000164.a___SI39no09_200mDRAFT_c1004029_1 # 159 # 227 # 1 # ID=179986_1;partial=00;start_type=ATG;rbs_motif=GGA/GAG/AGG;rbs_spacer=5-10bp;gc_cont=0.348	MIADVMVIYTNQPALAGGCCVD	OTHER	/	metagenome
family8	3300000214.a___SI54feb11_200mDRAFT_c1000908	3300000214.a___SI54feb11_200mDRAFT_c1000908_3 # 1290 # 1358 # 1 # ID=63590_3;partial=00;start_type=ATG;rbs_motif=GGA/GAG/AGG;rbs_spacer=5-10bp;gc_cont=0.348	MIADVMVIYTNQPALAGGCCVD	OTHER	/	metagenome
family8	3300000239.a___SI36aug09_120mDRAFT_1005160	3300000239.a___SI36aug09_120mDRAFT_1005160_3 # 2623 # 2691 # 1 # ID=247184_3;partial=00;start_type=ATG;rbs_motif=GGA/GAG/AGG;rbs_spacer=5-10bp;gc_cont=0.348	MIADVMVIYTNQPALAGGCCVD	OTHER	/	metagenome
family8	3300025770.a___Ga0209362_1005394	3300025770.a___Ga0209362_1005394_10 # 7821 # 7889 # -1 # ID=5394_10;partial=00;start_type=ATG;rbs_motif=GGA/GAG/AGG;rbs_spacer=5-10bp;gc_cont=0.348	MIADVMVIYTNQPALAGGCCVD	OTHER	/	metagenome
family9	3300000159.a___LPaug08P2610mDRAFT_c1002572	3300000159.a___LPaug08P2610mDRAFT_c1002572_4 # 2425 # 2610 # 1 # ID=69713_4;partial=00;start_type=ATG;rbs_motif=TAAAA;rbs_spacer=4bp;gc_cont=0.441	MEQNSTPTIQVTTSGKVVVTNAKDVLLLDGEGNAIATRNRFTLCNCGKTQDGPFCDGSHKQ	LANTHIPEPTIDE	/	metagenome
family9	3300002153.a___JGI24540J26637_10034928	3300002153.a___JGI24540J26637_10034928_3 # 1272 # 1457 # 1 # ID=34928_3;partial=00;start_type=ATG;rbs_motif=TAAAA;rbs_spacer=4bp;gc_cont=0.441	MEQNSTPTIQVTTSGKVVVTNAKDVLLLDGEGNAIATRNRFTLCNCGKTQDGPFCDGSHKQ	LANTHIPEPTIDE	/	metagenome
family9	3300025626.a___Ga0209716_1001190	3300025626.a___Ga0209716_1001190_15 # 11731 # 11916 # 1 # ID=1190_15;partial=00;start_type=ATG;rbs_motif=TAAAA;rbs_spacer=4bp;gc_cont=0.441	MEQNSTPTIQVTTSGKVVVTNAKDVLLLDGEGNAIATRNRFTLCNCGKTQDGPFCDGSHKQ	LANTHIPEPTIDE	/	metagenome
family9	3300025640.a___Ga0209198_1059453	3300025640.a___Ga0209198_1059453_2 # 530 # 715 # 1 # ID=59452_2;partial=00;start_type=ATG;rbs_motif=TAAAA;rbs_spacer=4bp;gc_cont=0.446	MEQNSTPTIQVTASGKVVVTNAKDVLLLDGEGNAIATRNRFTLCNCGKTQDGPFCDGSHKQ	LANTHIPEPTIDE	/	metagenome
family9	3300025849.a___Ga0209603_1000381	3300025849.a___Ga0209603_1000381_37 # 48945 # 49130 # 1 # ID=381_37;partial=00;start_type=ATG;rbs_motif=TAAAA;rbs_spacer=4bp;gc_cont=0.441	MEQNSTPTIQVTTSGKVVVTNAKDVLLLDGEGNAIATRNRFTLCNCGKTQDGPFCDGSHKQ	LANTHIPEPTIDE	/	metagenome
family9	3300025860.a___Ga0209119_1000020	3300025860.a___Ga0209119_1000020_123 # 152620 # 152805 # 1 # ID=20_123;partial=00;start_type=ATG;rbs_motif=TAAAA;rbs_spacer=4bp;gc_cont=0.446	MEQNSTPTIQVTTSGKVVVTNAKDVLLLDGEGNAIATRNRFTLCNCGKTQDGPFCDGSHKQ	LANTHIPEPTIDE	/	metagenome
family9	3300027687.a___Ga0209710_1000841	3300027687.a___Ga0209710_1000841_16 # 16860 # 17045 # 1 # ID=841_16;partial=00;start_type=ATG;rbs_motif=TAAAA;rbs_spacer=4bp;gc_cont=0.441	MEQNSTPTIQVTTSGKVVVTNAKDVLLLDGEGNAIATRNRFTLCNCGKTQDGPFCDGSHKQ	LANTHIPEPTIDE	/	metagenome
family9	3300027752.a___Ga0209192_10000868	3300027752.a___Ga0209192_10000868_21 # 22246 # 22431 # 1 # ID=868_21;partial=00;start_type=ATG;rbs_motif=TAAAA;rbs_spacer=4bp;gc_cont=0.441	MEQNSTPTIQVTTSGKVVVTNAKDVLLLDGEGNAIATRNRFTLCNCGKTQDGPFCDGSHKQ	LANTHIPEPTIDE	/	metagenome
family9	3300027788.a___Ga0209711_10002538	3300027788.a___Ga0209711_10002538_12 # 7337 # 7522 # -1 # ID=2538_12;partial=00;start_type=ATG;rbs_motif=TAAAA;rbs_spacer=4bp;gc_cont=0.446	MEQNSTPTIQVTTSGKVVVTNAKDVLLLDGEGNAIATRNRFTLCNCGKTQDGPFCDGSHKQ	LANTHIPEPTIDE	/	metagenome
family9	3300027810.a___Ga0209302_10015471	3300027810.a___Ga0209302_10015471_2 # 1152 # 1337 # 1 # ID=15471_2;partial=00;start_type=ATG;rbs_motif=TAAAA;rbs_spacer=4bp;gc_cont=0.446	MEQNSTPTIQVTTSGKVVVTNAKDVLLLDGEGNAIATRNRFTLCNCGKTQDGPFCDGSHKQ	LANTHIPEPTIDE	/	metagenome
family9	TARA_B110001452_G_C15238511_1	TARA_B110001452_G_C15238511_1_6 # 3562 # 3747 # -1 # ID=257816_6;partial=00;start_type=ATG;rbs_motif=TAAAA;rbs_spacer=4bp;gc_cont=0.452	MEQNSTPTIQVTASGKVVVTNAKDVLLLDGEGNAIATRNRFTLCNCGKTQDGPFCDGSHKQ	LANTHIPEPTIDE	/	metagenome
family9	k117_1661156	k117_1661156_6 # 4948 # 5133 # 1 # ID=1894902_6;partial=00;start_type=ATG;rbs_motif=TAAAA;rbs_spacer=4bp;gc_cont=0.446	MEQNSTPTIQVTASGKVVVTNAKDVLLLDGEGNAIATRNRFTLCNCGKTQDGPFCDGSHKQ	LANTHIPEPTIDE	/	metagenome
family9	k117_1611169	k117_1611169_5 # 3134 # 3319 # -1 # ID=82180_5;partial=00;start_type=ATG;rbs_motif=TAAAA;rbs_spacer=4bp;gc_cont=0.446	MEQNSTPTIQVTTSGKVVVTNAKDVLLLDGEGNAIATRNRFTLCNCGKTQDGPFCDGSHKQ	LANTHIPEPTIDE	/	metagenome
family9	k117_2437655	k117_2437655_3 # 1023 # 1208 # -1 # ID=136562_3;partial=00;start_type=ATG;rbs_motif=TAAAA;rbs_spacer=4bp;gc_cont=0.446	MEQNSTPTIQVTTSGKVVVTNAKDVLLLDGEGNAIATRNRFTLCNCGKTQDGPFCDGSHKQ	LANTHIPEPTIDE	/	metagenome
family9	k117_519893	k117_519893_2 # 468 # 653 # -1 # ID=12306_2;partial=00;start_type=ATG;rbs_motif=TAAAA;rbs_spacer=4bp;gc_cont=0.452	MEQNSTPTIQVTASGKVVVTNAKDVLLLDGEGNAIATRNRFTLCNCGKTQDGPFCDGSHKQ	LANTHIPEPTIDE	/	metagenome
family9	k117_1750778	k117_1750778_3 # 648 # 833 # -1 # ID=81899_3;partial=00;start_type=ATG;rbs_motif=TAAAA;rbs_spacer=4bp;gc_cont=0.457	MEQNSTPTIQVTTSGKVVVTNAKDVLLLDGEGNAIATRNRFTLCNCGKTQDGPFCDGSHKQ	LANTHIPEPTIDE	/	metagenome
family9	TARA_SAMEA4397196_METAG_LDOCDFIK	TARA_SAMEA4397196_METAG-scaffold_3172_15 # 15176 # 15361 # 1 # ID=32337_15;partial=00;start_type=ATG;rbs_motif=TAAAA;rbs_spacer=4bp;gc_cont=0.441	MEQNSTPTIQVTTSGKVVVTNAKDVLLLDGEGNAIATRNRFTLCNCGKTQDGPFCDGSHKQ	LANTHIPEPTIDE	/	metagenome
family9	TARA_SAMEA4398094_BIN_00000099	TARA_SAMEA4398094_METAG-scaffold_6441_10 # 8396 # 8581 # 1 # ID=43286_10;partial=00;start_type=ATG;rbs_motif=TAAAA;rbs_spacer=4bp;gc_cont=0.441	MEQNSTPTIQVTTSGKVVVTNAKDVLLLDGEGNAIATRNRFTLCNCGKTQDGPFCDGSHKQ	LANTHIPEPTIDE	/	metagenome
family9	TARA_SAMEA4397516_METAG_GOKBCAFM	TARA_SAMEA4397516_METAG-scaffold_607_6 # 3969 # 4154 # -1 # ID=15771_6;partial=00;start_type=ATG;rbs_motif=TAAAA;rbs_spacer=4bp;gc_cont=0.452	MEQNSTPTIQVTTSGKVVVTNAKDVLLLDGEGNAIATRNRFTLCNCGKTQDGPFCDGSHKQ	LANTHIPEPTIDE	/	metagenome
family9	TARA_SAMEA4397157_METAG_PIHBEONH	TARA_SAMEA4397157_METAG-scaffold_336_4 # 3143 # 3328 # -1 # ID=15026_4;partial=00;start_type=ATG;rbs_motif=TAAAA;rbs_spacer=4bp;gc_cont=0.452	MEQNSTPTIQVTTSGKVVVTNAKDVLLLDGEGNAIATRNRFTLCNCGKTQDGPFCDGSHKQ	LANTHIPEPTIDE	/	metagenome
family9	TARA_SAMEA4397569_BIN_00000003	TARA_SAMEA4397569_METAG-scaffold_2496_2 # 432 # 617 # -1 # ID=24412_2;partial=00;start_type=ATG;rbs_motif=TAAAA;rbs_spacer=4bp;gc_cont=0.446	MEQNSTPTIQVTTSGKVVVTNAKDVLLLDGEGNAIATRNRFTLCNCGKTQDGPFCDGSHKQ	LANTHIPEPTIDE	/	metagenome
family9	TARA_SAMEA4397798_BIN_00000069	TARA_SAMEA4397798_METAG-scaffold_3964_2 # 391 # 576 # -1 # ID=28714_2;partial=00;start_type=ATG;rbs_motif=TAAAA;rbs_spacer=4bp;gc_cont=0.446	MEQNSTPTIQVTTSGKVVVTNAKDVLLLDGEGNAIATRNRFTLCNCGKTQDGPFCDGSHKQ	LANTHIPEPTIDE	/	metagenome
family9	TARA_SAMEA4396538_BIN_00000080	TARA_SAMEA4396538_METAG-scaffold_4235_13 # 10531 # 10716 # 1 # ID=38282_13;partial=00;start_type=ATG;rbs_motif=TAAAA;rbs_spacer=4bp;gc_cont=0.441	MEQNSTPTIQVTTSGKVVVTNAKDVLLLDGEGNAIATRNRFTLCNCGKTQDGPFCDGSHKQ	LANTHIPEPTIDE	/	metagenome
family9	BGEO_SAMN07136485_METAG-scaffold_22803	BGEO_SAMN07136485_METAG-scaffold_22803_2 # 486 # 671 # -1 # ID=544632_2;partial=00;start_type=ATG;rbs_motif=TAAAA;rbs_spacer=4bp;gc_cont=0.441	MEQNSTPTIQVTTSGKVVVTNAKDVLLLDGEGNTIATRNRFTLCNCGKTQDGPFCDGSHKQ	LANTHIPEPTIDE	/	metagenome
family9	TARA_SAMEA4397278_BIN_00000133	TARA_SAMEA4397278_METAG-scaffold_4304_10 # 8398 # 8583 # 1 # ID=40830_10;partial=00;start_type=ATG;rbs_motif=TAAAA;rbs_spacer=4bp;gc_cont=0.446	MEQNSTPTIQVTTSGKVVVTNAKDVLLLDGEGNAIATRNRFTLCNCGKTQDGPFCDGSHKQ	LANTHIPEPTIDE	/	metagenome
family9	TARA_SAMEA4397355_METAG-scaffold_37501	TARA_SAMEA4397355_METAG-scaffold_37501_2 # 337 # 522 # -1 # ID=200341_2;partial=00;start_type=ATG;rbs_motif=TAAAA;rbs_spacer=4bp;gc_cont=0.452	MEQNSTPTIQVTTSGKVVVTNAKDVLLLDGEGNAIATRNRFTLCNCGKTQDGPFCDGSHKQ	LANTHIPEPTIDE	/	metagenome
family9	TARA_SAMEA4397756_BIN_00000004	TARA_SAMEA4397756_METAG-scaffold_4181_9 # 8318 # 8503 # 1 # ID=43167_9;partial=00;start_type=ATG;rbs_motif=TAAAA;rbs_spacer=4bp;gc_cont=0.441	MEQNSTPTIQVTTSGKVVVTNAKDVLLLDGEGNAIATRNRFTLCNCGKTQDGPFCDGSHKQ	LANTHIPEPTIDE	/	metagenome
family9	TARA_SAMEA4398370_METAG_EPFFCFAC	TARA_SAMEA4398370_METAG-scaffold_9407_1 # 48 # 233 # -1 # ID=67258_1;partial=00;start_type=ATG;rbs_motif=TAAAA;rbs_spacer=4bp;gc_cont=0.446	MEQNSTPTIQVTTSGKVVVTNAKDVLLLDGEGNAIATRNRFTLCNCGKTQDGPFCDGSHKQ	LANTHIPEPTIDE	/	metagenome
family9	TARA_SAMEA4398247_METAG_GJCPNLLD	TARA_SAMEA4398247_METAG-scaffold_470_30 # 38538 # 38723 # 1 # ID=18342_30;partial=00;start_type=ATG;rbs_motif=TAAAA;rbs_spacer=4bp;gc_cont=0.441	MEQNSTPTIQVTTSGKVVVTNAKDVLLLDGEGNAIATRNRFTLCNCGKTQDGPFCDGSHKQ	LANTHIPEPTIDE	/	metagenome
family9	TARA_SAMEA4398219_METAG_MJFJLFPB	TARA_SAMEA4398219_METAG-scaffold_20829_2 # 774 # 959 # 1 # ID=124657_2;partial=00;start_type=ATG;rbs_motif=TAAAA;rbs_spacer=4bp;gc_cont=0.452	MEQNSTPTIQVTTSGKVVVTNAKDVLLLDGEGNAIATRNRFTLCNCGKTQDGPFCDGSHKQ	LANTHIPEPTIDE	/	metagenome
family9	TARA_SAMEA4397101_METAG-scaffold_403	TARA_SAMEA4397101_METAG-scaffold_403_1 # 48 # 233 # -1 # ID=21349_1;partial=00;start_type=ATG;rbs_motif=TAAAA;rbs_spacer=4bp;gc_cont=0.452	MEQNSTPTIQVTTSGKVVVTNAKDVLLLDGEGNAIATRNRFTLCNCGKTQDGPFCDGSHKQ	LANTHIPEPTIDE	/	metagenome
family9	TARA_SAMEA4398176_BIN_00000089	TARA_SAMEA4398176_METAG-scaffold_481_2 # 403 # 588 # -1 # ID=20417_2;partial=00;start_type=ATG;rbs_motif=TAAAA;rbs_spacer=4bp;gc_cont=0.446	MEQNSTPTIQVTTSGKVVVTNAKDVLLLDGEGNAIATRNRFTLCNCGKTQDGPFCDGSHKQ	LANTHIPEPTIDE	/	metagenome
family9	TARA_SAMEA4398150_METAG_ILKOMGLA	TARA_SAMEA4398150_METAG-scaffold_1495_16 # 17465 # 17650 # 1 # ID=29177_16;partial=00;start_type=ATG;rbs_motif=TAAAA;rbs_spacer=4bp;gc_cont=0.441	MEQNSTPTIQVTTSGKVVVTNAKDVLLLDGEGNAIATRNRFTLCNCGKTQDGPFCDGSHKQ	LANTHIPEPTIDE	/	metagenome
family9	TARA_SAMEA4397903_METAG_CPLGDKFP	TARA_SAMEA4397903_METAG-scaffold_7868_9 # 8317 # 8502 # 1 # ID=56221_9;partial=00;start_type=ATG;rbs_motif=TAAAA;rbs_spacer=4bp;gc_cont=0.441	MEQNSTPTIQVTTSGKVVVTNAKDVLLLDGEGNAIATRNRFTLCNCGKTQDGPFCDGSHKQ	LANTHIPEPTIDE	/	metagenome
family10	3300000151.a___SI53jan11_200mDRAFT_c1002268	3300000151.a___SI53jan11_200mDRAFT_c1002268_2 # 834 # 971 # 1 # ID=48934_2;partial=00;start_type=ATG;rbs_motif=GGA/GAG/AGG;rbs_spacer=5-10bp;gc_cont=0.486	MHRAQYPKIEEHKVSHQKILADFSVTAEAENFVGALSVVGACWVS	OTHER	/	metagenome
family10	3300024256.a___Ga0233446_1001350	3300024256.a___Ga0233446_1001350_5 # 2282 # 2419 # 1 # ID=1350_5;partial=00;start_type=ATG;rbs_motif=GGA/GAG/AGG;rbs_spacer=5-10bp;gc_cont=0.486	MHRAQYPKIEEHKVSHQKILADFSVTAEAENFVGALSVVGACWVS	OTHER	/	metagenome
family10	3300024257.a___Ga0233442_1001381	3300024257.a___Ga0233442_1001381_16 # 16387 # 16524 # -1 # ID=1381_16;partial=00;start_type=ATG;rbs_motif=GGA/GAG/AGG;rbs_spacer=5-10bp;gc_cont=0.486	MHRAQYPKIEEHKVSHQKILADFSVTAEAENFVGALSVVGACWVS	OTHER	/	metagenome
family10	3300025431_6	3300025431.a___Ga0209449_1000804_6 # 2399 # 2536 # 1 # ID=804_6;partial=00;start_type=ATG;rbs_motif=GGA/GAG/AGG;rbs_spacer=5-10bp;gc_cont=0.486	MHRAQYPKIEEHKVSHQKILADFSVTAEAENFVGALSVVGACWVS	OTHER	/	metagenome
family10	3300025478.a___Ga0209576_1001854	3300025478.a___Ga0209576_1001854_6 # 7015 # 7152 # -1 # ID=1854_6;partial=00;start_type=ATG;rbs_motif=GGA/GAG/AGG;rbs_spacer=5-10bp;gc_cont=0.486	MHRAQYPKIEEHKVSHQKILADFSVTAEAENFVGALSVVGACWVS	OTHER	/	metagenome
family10	3300025659.a___Ga0209249_1001831	3300025659.a___Ga0209249_1001831_15 # 16335 # 16472 # -1 # ID=1831_15;partial=00;start_type=ATG;rbs_motif=GGA/GAG/AGG;rbs_spacer=5-10bp;gc_cont=0.486	MHRAQYPKIEEHKVSHQKILADFSVTAEAENFVGALSVVGACWVS	OTHER	/	metagenome
family10	3300028173.a___Ga0257118_1005743	3300028173.a___Ga0257118_1005743_2 # 2380 # 2517 # -1 # ID=5743_2;partial=00;start_type=ATG;rbs_motif=GGA/GAG/AGG;rbs_spacer=5-10bp;gc_cont=0.486	MHRAQYPKIEEHKVSHQKILADFSVTAEAENFVGALSVVGACWVS	OTHER	/	metagenome
family10	3300028274.a___Ga0257119_1015974	3300028274.a___Ga0257119_1015974_2 # 609 # 746 # -1 # ID=15974_2;partial=00;start_type=ATG;rbs_motif=GGA/GAG/AGG;rbs_spacer=5-10bp;gc_cont=0.486	MHRAQYPKIEEHKVSHQKILADFSVTAEAENFVGALSVVGACWVS	OTHER	/	metagenome
family11	3300000152.a___LPjun08P12500mDRAFT_c1005186	3300000152.a___LPjun08P12500mDRAFT_c1005186_2 # 1582 # 1713 # 1 # ID=1296_2;partial=00;start_type=GTG;rbs_motif=GGAG/GAGG;rbs_spacer=5-10bp;gc_cont=0.424	MSDYELIEESPLDGVEHEFDGVTVSEVTDKSFGYGRTAKAEVC	LASSO_PEPTIDE	/	metagenome
family12	3300000166.a___SI48aug10_200mDRAFT_c1000150	3300000166.a___SI48aug10_200mDRAFT_c1000150_1 # 43 # 153 # -1 # ID=75_1;partial=00;start_type=ATG;rbs_motif=GGAG/GAGG;rbs_spacer=5-10bp;gc_cont=0.360	MMSDLKWHRYAQNPEVKLLEDFVTIVGEDENRCFWG	LASSO_PEPTIDE	/	metagenome
family12	3300000257_4	3300000257.a___LP_F_10_SI03_100DRAFT_1000220_8 # 6818 # 6928 # -1 # ID=234594_8;partial=00;start_type=ATG;rbs_motif=GGAG/GAGG;rbs_spacer=5-10bp;gc_cont=0.360	MMSDLKWHRYAQNPEVKLLEDFVTIVGEDENRCFWG	LASSO_PEPTIDE	/	metagenome
family12	3300028287_19	3300028287.a___Ga0257126_1000024_106 # 97521 # 97631 # 1 # ID=24_106;partial=00;start_type=ATG;rbs_motif=GGAG/GAGG;rbs_spacer=5-10bp;gc_cont=0.360	MMSDLKWHRYAQNPEVKLLEDFVTIVGEDENRCFWG	LASSO_PEPTIDE	/	metagenome
family13	3300000154_21	3300000154.a___SI47jul10_150mDRAFT_c1000010_70 # 63446 # 63571 # -1 # ID=3_70;partial=00;start_type=ATG;rbs_motif=TAA;rbs_spacer=11bp;gc_cont=0.421	MMCSNCNTEKEADMMCDCGACKPCCGGSCQANKSEGGEASS	rSAM_MODIFIED_RiPP	/	metagenome
family14	3300025622_25	3300025622.a___Ga0209264_1003981_3 # 2679 # 2819 # -1 # ID=3981_3;partial=00;start_type=ATG;rbs_motif=AAAA;rbs_spacer=12bp;gc_cont=0.433	MSKSKQNYSKKVMTPEEVQVTMSQVEKAGINQASDFGGEGIGDKGC	LASSO_PEPTIDE	/	metagenome
family15	3300024257.a___Ga0233442_1022906	3300024257.a___Ga0233442_1022906_3 # 1716 # 1847 # -1 # ID=22906_3;partial=00;start_type=ATG;rbs_motif=TAA;rbs_spacer=3bp;gc_cont=0.311	MTYHTSSAQYESNPVYESNHNSKFNIIGVCRGTCYTSQGCSCR	LANTHIPEPTIDE	/	metagenome
family15	3300025458.a___Ga0209559_1011905	3300025458.a___Ga0209559_1011905_3 # 1831 # 1962 # -1 # ID=11905_3;partial=00;start_type=ATG;rbs_motif=TAA;rbs_spacer=3bp;gc_cont=0.311	MTYHTSSAQYESNPVYESNHNSKFNIIGVCRGTCYTSQGCSCR	LANTHIPEPTIDE	/	metagenome
family15	3300025488.a___Ga0209141_1016524	3300025488.a___Ga0209141_1016524_2 # 1395 # 1526 # 1 # ID=16524_2;partial=00;start_type=ATG;rbs_motif=TAA;rbs_spacer=3bp;gc_cont=0.318	MTYHTSSAQYESNPVYESNHNSKFNIIGVCRGTCYTSQGCSCR	LANTHIPEPTIDE	/	metagenome
family16	3300000168.a___LPjun09P1210mDRAFT_c1003499	3300000168.a___LPjun09P1210mDRAFT_c1003499_2 # 609 # 725 # 1 # ID=1750_2;partial=00;start_type=ATG;rbs_motif=AGGAG;rbs_spacer=5-10bp;gc_cont=0.282	MAKKKIKKNSKKLKKTNGSVGGKADVHAHEEAKEIKVC	rSAM_MODIFIED_RiPP	/	metagenome
family17	3300000163.a___LPjun09P162000mDRAFT_c1002342	3300000163.a___LPjun09P162000mDRAFT_c1002342_4 # 2924 # 3046 # 1 # ID=703_4;partial=00;start_type=ATG;rbs_motif=TAAA;rbs_spacer=11bp;gc_cont=0.480	MDYVAEAATLEEVMPLDMEEVLEGGATPLILDIREPYEFD	LASSO_PEPTIDE	/	metagenome
family17	3300006316.a___Ga0068473_1297212	3300006316.a___Ga0068473_1297212_3 # 1496 # 1618 # 1 # ID=284937_3;partial=00;start_type=ATG;rbs_motif=TAAA;rbs_spacer=11bp;gc_cont=0.480	MDYVAEAATLEEVMPLDMEEVLEGGATPLILDIREPYEFD	LASSO_PEPTIDE	/	metagenome
family17	3300006313.a___Ga0068472_10208039	3300006313.a___Ga0068472_10208039_3 # 2101 # 2223 # -1 # ID=206039_3;partial=00;start_type=ATG;rbs_motif=TAA;rbs_spacer=12bp;gc_cont=0.480	MDYVAEAATLEEVMPLDMEEVLEGGATPLILDIREPYEFD	LASSO_PEPTIDE	/	metagenome
family17	3300006335.a___Ga0068480_1108047	3300006335.a___Ga0068480_1108047_2 # 2149 # 2271 # 1 # ID=106420_2;partial=00;start_type=ATG;rbs_motif=TAAA;rbs_spacer=11bp;gc_cont=0.488	MDYVAEAATLEEVMPLDMEEVLEGGATPLILDIREPYEFD	LASSO_PEPTIDE	/	metagenome
family17	3300006338.a___Ga0068482_1229734	3300006338.a___Ga0068482_1229734_3 # 2298 # 2420 # -1 # ID=227636_3;partial=00;start_type=ATG;rbs_motif=AATAA;rbs_spacer=12bp;gc_cont=0.480	MDYVAEAATLEEVMPLDMEEVLEGGATPLILDIREPYEFD	LASSO_PEPTIDE	/	metagenome
family17	3300006341.a___Ga0068493_10181523	3300006341.a___Ga0068493_10181523_5 # 3678 # 3800 # 1 # ID=179453_5;partial=00;start_type=ATG;rbs_motif=TAA;rbs_spacer=12bp;gc_cont=0.480	MDYVAEAATLEEVMPLDMEEVLEGGATPLILDIREPYEFD	LASSO_PEPTIDE	ptm	metagenome
family17	3300028487.a___Ga0257109_1004794	3300028487.a___Ga0257109_1004794_2 # 881 # 1003 # 1 # ID=4794_2;partial=00;start_type=ATG;rbs_motif=TAA;rbs_spacer=12bp;gc_cont=0.480	MDYVAEAATLEEVMPLDMEEVLEGGATPLILDIREPYEFD	LASSO_PEPTIDE	ptm	metagenome
family17	MALA_SAMN05421699_METAG_JIJFALML	MALA_SAMN05421699_METAG-scaffold_3493_1 # 88 # 210 # -1 # ID=85030_1;partial=00;start_type=ATG;rbs_motif=TAAA;rbs_spacer=11bp;gc_cont=0.480	MDYVAEAATLEEVMPLDMEEVLEGGATPLILDIREPYEFD	LASSO_PEPTIDE	/	metagenome
family18	3300000163.a___LPjun09P162000mDRAFT_c1002597	3300000163.a___LPjun09P162000mDRAFT_c1002597_4 # 1485 # 1658 # 1 # ID=155001_4;partial=00;start_type=ATG;rbs_motif=GGAG/GAGG;rbs_spacer=5-10bp;gc_cont=0.437	MSLIEVKVPDIGDFEDVEIIEVICNVDDMVAPGGSADFCGKRQGNHGCSLTGCGNNP	LANTHIPEPTIDE	/	metagenome
family18	3300000181_2	3300000181.a___LPjun08P4500mDRAFT_c1000015_13 # 12997 # 13170 # -1 # ID=5_13;partial=00;start_type=ATG;rbs_motif=GGAG/GAGG;rbs_spacer=5-10bp;gc_cont=0.420	MSLIEVKVPDIGDFEDVEIIEVICNVDDMVAPGGSTDFCGKRQGNHGCSLTGCGNNP	LANTHIPEPTIDE	/	metagenome
family18	3300000247_3	3300000247.a___LPaug09P26500mDRAFT_1000177_14 # 11916 # 12089 # 1 # ID=135086_14;partial=00;start_type=ATG;rbs_motif=GGAG/GAGG;rbs_spacer=5-10bp;gc_cont=0.431	MSLIEVKVPDIGDFEDVEIIEVICNVDDMVAPGGSTDFCGKRQGNHGCSLTGCGNNP	LANTHIPEPTIDE	/	metagenome
family18	3300000322_3	3300000322.a___LPaug08P121000mDRAFT_1001624_2 # 2257 # 2430 # -1 # ID=114508_2;partial=00;start_type=ATG;rbs_motif=GGAG/GAGG;rbs_spacer=5-10bp;gc_cont=0.425	MSLIEVKVPDIGDFEDVEIIEVICNVDDMVAPGGSADFCGKRQGNHGCSLTGCGNNP	LANTHIPEPTIDE	/	metagenome
family18	3300000323.a___LPaug09P202000mDRAFT_1001568	3300000323.a___LPaug09P202000mDRAFT_1001568_3 # 2723 # 2896 # 1 # ID=391_3;partial=00;start_type=ATG;rbs_motif=GGAG/GAGG;rbs_spacer=5-10bp;gc_cont=0.437	MSLIEVKVPDIGDFEDVEIIEVICNVDDMVAPGGSADFCGKRQGNHGCSLTGCGNNP	LANTHIPEPTIDE	/	metagenome
family19	3300000161.a___LPaug08P122000mDRAFT_c1005455	3300000161.a___LPaug08P122000mDRAFT_c1005455_4 # 2313 # 2432 # -1 # ID=1364_4;partial=00;start_type=ATG;rbs_motif=GGAG/GAGG;rbs_spacer=5-10bp;gc_cont=0.292	MINSKECPKCGSGNIVCKDEKFSCNSCKLSFCCFGDSKN	LANTHIPEPTIDE	/	metagenome
family19	3300000226.a___SI34jun09_135mDRAFT_1010898	3300000226.a___SI34jun09_135mDRAFT_1010898_3 # 730 # 849 # -1 # ID=148719_3;partial=00;start_type=ATG;rbs_motif=GGAG/GAGG;rbs_spacer=5-10bp;gc_cont=0.292	MINSKECPKCGSGNIVCKDEKFSCNSCKLSFCCFGDSKN	LANTHIPEPTIDE	/	metagenome
family19	3300025660.a___Ga0209045_1016859	3300025660.a___Ga0209045_1016859_5 # 2357 # 2476 # 1 # ID=16859_5;partial=00;start_type=ATG;rbs_motif=GGAG/GAGG;rbs_spacer=5-10bp;gc_cont=0.292	MINSKECPKCGSGNIVCKDEKFSCNSCKLSFCCFGDSKN	LANTHIPEPTIDE	/	metagenome
family19	3300025727.a___Ga0209047_1005930	3300025727.a___Ga0209047_1005930_9 # 4600 # 4719 # 1 # ID=5930_9;partial=00;start_type=ATG;rbs_motif=GGAG/GAGG;rbs_spacer=5-10bp;gc_cont=0.292	MINSKECPKCGSGNIVCKDEKFSCNSCKLSFCCFGDSKN	LANTHIPEPTIDE	/	metagenome
family19	3300028188.a___Ga0257124_1010910	3300028188.a___Ga0257124_1010910_3 # 712 # 831 # 1 # ID=10910_3;partial=00;start_type=ATG;rbs_motif=GGAG/GAGG;rbs_spacer=5-10bp;gc_cont=0.292	MINSKECPKCGSGNIVCKDEKFSCNSCKLSFCCFGDSKN	LANTHIPEPTIDE	/	metagenome
family20	3300000161.a___LPaug08P122000mDRAFT_c1000099	3300000161.a___LPaug08P122000mDRAFT_c1000099_22 # 23655 # 23756 # 1 # ID=54468_22;partial=00;start_type=ATG;rbs_motif=AGGAG;rbs_spacer=5-10bp;gc_cont=0.343	MIDLNEKVTDADLEECFSLSGCHNVGWTVACSV	LANTHIPEPTIDE	ptm	metagenome
family20	3300000117.a___DelMOWin2010_c10001372	3300000117.a___DelMOWin2010_c10001372_3 # 1524 # 1625 # -1 # ID=109466_3;partial=00;start_type=ATG;rbs_motif=AGGAG;rbs_spacer=5-10bp;gc_cont=0.353	MIDLNEEVTDADIEECFALSGCPNIGWTVACSV	LANTHIPEPTIDE	ptm	metagenome
family20	3300021378.a___Ga0213861_10006864	3300021378.a___Ga0213861_10006864_3 # 1716 # 1817 # -1 # ID=6864_3;partial=00;start_type=ATG;rbs_motif=AGGAG;rbs_spacer=5-10bp;gc_cont=0.353	MIDLNEEVTDADIEECFALSGCPNIGWTVACSV	LANTHIPEPTIDE	ptm	metagenome
family20	3300022888.a___Ga0233428_1000793	3300022888.a___Ga0233428_1000793_29 # 29128 # 29229 # 1 # ID=793_29;partial=00;start_type=ATG;rbs_motif=AGGAG;rbs_spacer=5-10bp;gc_cont=0.343	MIDLNEKVTDADLEECFSLSGCHNVGWTVACSV	LANTHIPEPTIDE	ptm	metagenome
family20	3300022931.a___Ga0233433_10000352	3300022931.a___Ga0233433_10000352_43 # 41249 # 41350 # 1 # ID=352_43;partial=00;start_type=ATG;rbs_motif=AGGAG;rbs_spacer=5-10bp;gc_cont=0.343	MIDLNEKVTDADLEECFSLSGCHNVGWTVACSV	LANTHIPEPTIDE	ptm	metagenome
family20	3300022933.a___Ga0233427_10000663	3300022933.a___Ga0233427_10000663_43 # 41247 # 41348 # 1 # ID=663_43;partial=00;start_type=ATG;rbs_motif=AGGAG;rbs_spacer=5-10bp;gc_cont=0.343	MIDLNEKVTDADLEECFSLSGCHNVGWTVACSV	LANTHIPEPTIDE	ptm	metagenome
family20	3300024257.a___Ga0233442_1000552	3300024257.a___Ga0233442_1000552_25 # 25838 # 25939 # 1 # ID=552_25;partial=00;start_type=ATG;rbs_motif=AGGAG;rbs_spacer=5-10bp;gc_cont=0.343	MIDLNEKVTDADLEECFSLSGCHNVGWTVACSV	LANTHIPEPTIDE	ptm	metagenome
family20	3300024258.a___Ga0233440_1001276	3300024258.a___Ga0233440_1001276_3 # 848 # 949 # -1 # ID=1276_3;partial=00;start_type=ATG;rbs_motif=AGGAG;rbs_spacer=5-10bp;gc_cont=0.343	MIDLNEKVTDADLEECFSLSGCHNVGWTVACSV	LANTHIPEPTIDE	ptm	metagenome
family20	3300024260.a___Ga0233441_1000749	3300024260.a___Ga0233441_1000749_13 # 13412 # 13513 # -1 # ID=749_13;partial=00;start_type=ATG;rbs_motif=AGGAG;rbs_spacer=5-10bp;gc_cont=0.343	MIDLNEKVTDADLEECFSLSGCHNVGWTVACSV	LANTHIPEPTIDE	ptm	metagenome
family20	3300024339.a___Ga0233445_1000618	3300024339.a___Ga0233445_1000618_11 # 12039 # 12140 # -1 # ID=618_11;partial=00;start_type=ATG;rbs_motif=AGGAG;rbs_spacer=5-10bp;gc_cont=0.343	MIDLNEKVTDADLEECFSLSGCHNVGWTVACSV	LANTHIPEPTIDE	ptm	metagenome
family20	3300025431.a___Ga0209449_1000419	3300025431.a___Ga0209449_1000419_6 # 2107 # 2208 # -1 # ID=419_6;partial=00;start_type=ATG;rbs_motif=AGGAG;rbs_spacer=5-10bp;gc_cont=0.343	MIDLNEKVTDADLEECFSLSGCHNVGWTVACSV	LANTHIPEPTIDE	ptm	metagenome
family20	3300025458.a___Ga0209559_1000234	3300025458.a___Ga0209559_1000234_22 # 22895 # 22996 # 1 # ID=234_22;partial=00;start_type=ATG;rbs_motif=AGGAG;rbs_spacer=5-10bp;gc_cont=0.343	MIDLNEKVTDADLEECFSLSGCHNVGWTVACSV	LANTHIPEPTIDE	ptm	metagenome
family20	3300025592.a___Ga0209658_1000310	3300025592.a___Ga0209658_1000310_27 # 27816 # 27917 # 1 # ID=310_27;partial=00;start_type=ATG;rbs_motif=AGGAG;rbs_spacer=5-10bp;gc_cont=0.343	MIDLNEKVTDADLEECFSLSGCHNVGWTVACSV	LANTHIPEPTIDE	ptm	metagenome
family20	3300025594.a___Ga0209094_1012866	3300025594.a___Ga0209094_1012866_4 # 2660 # 2761 # 1 # ID=12866_4;partial=00;start_type=ATG;rbs_motif=AGGAG;rbs_spacer=5-10bp;gc_cont=0.353	MIDLNEEVTDADIEECFALSGCPNIGWTVACSV	LANTHIPEPTIDE	/	metagenome
family20	3300025622_33	3300025622.a___Ga0209264_1000635_23 # 23606 # 23707 # 1 # ID=635_23;partial=00;start_type=ATG;rbs_motif=AGGAG;rbs_spacer=5-10bp;gc_cont=0.343	MIDLNEKVTDADLEECFSLSGCHNVGWTVACSV	LANTHIPEPTIDE	ptm	metagenome
family20	3300025643.a___Ga0209151_1000152	3300025643.a___Ga0209151_1000152_22 # 22789 # 22890 # 1 # ID=152_22;partial=00;start_type=ATG;rbs_motif=AGGAG;rbs_spacer=5-10bp;gc_cont=0.343	MIDLNEKVTDADLEECFSLSGCHNVGWTVACSV	LANTHIPEPTIDE	ptm	metagenome
family20	3300025656.a___Ga0209054_1000132	3300025656.a___Ga0209054_1000132_34 # 31834 # 31935 # -1 # ID=132_34;partial=00;start_type=ATG;rbs_motif=AGGAG;rbs_spacer=5-10bp;gc_cont=0.343	MIDLNEKVTDADLEECFSLSGCHNVGWTVACSV	LANTHIPEPTIDE	ptm	metagenome
family20	3300025662.a___Ga0209664_1000175	3300025662.a___Ga0209664_1000175_9 # 9991 # 10092 # -1 # ID=175_9;partial=00;start_type=ATG;rbs_motif=AGGAG;rbs_spacer=5-10bp;gc_cont=0.343	MIDLNEKVTDADLEECFSLSGCHNVGWTVACSV	LANTHIPEPTIDE	ptm	metagenome
family20	3300025663.a___Ga0209775_1000074	3300025663.a___Ga0209775_1000074_36 # 36208 # 36309 # 1 # ID=74_36;partial=00;start_type=ATG;rbs_motif=AGGAG;rbs_spacer=5-10bp;gc_cont=0.343	MIDLNEKVTDADLEECFSLSGCHNVGWTVACSV	LANTHIPEPTIDE	ptm	metagenome
family20	3300025676.a___Ga0209657_1000648	3300025676.a___Ga0209657_1000648_17 # 20230 # 20331 # 1 # ID=648_17;partial=00;start_type=ATG;rbs_motif=AGGAG;rbs_spacer=5-10bp;gc_cont=0.343	MIDLNEKVTDADLEECFSLSGCHNVGWTVACSV	LANTHIPEPTIDE	ptm	metagenome
family20	3300025681.a___Ga0209263_1000337	3300025681.a___Ga0209263_1000337_16 # 17931 # 18032 # 1 # ID=337_16;partial=00;start_type=ATG;rbs_motif=AGGAG;rbs_spacer=5-10bp;gc_cont=0.343	MIDLNEKVTDADLEECFSLSGCHNVGWTVACSV	LANTHIPEPTIDE	ptm	metagenome
family20	3300025690.a___Ga0209505_1001201	3300025690.a___Ga0209505_1001201_3 # 1362 # 1463 # -1 # ID=1201_3;partial=00;start_type=ATG;rbs_motif=AGGAG;rbs_spacer=5-10bp;gc_cont=0.353	MIDLNEEVTDADIEECFALSGCPNIGWTVACSV	LANTHIPEPTIDE	ptm	metagenome
family20	3300025707.a___Ga0209667_1000315	3300025707.a___Ga0209667_1000315_22 # 23116 # 23217 # 1 # ID=315_22;partial=00;start_type=ATG;rbs_motif=AGGAG;rbs_spacer=5-10bp;gc_cont=0.343	MIDLNEKVTDADLEECFSLSGCHNVGWTVACSV	LANTHIPEPTIDE	ptm	metagenome
family20	3300025707.a___Ga0209667_1000359	3300025707.a___Ga0209667_1000359_17 # 19590 # 19691 # 1 # ID=359_17;partial=00;start_type=ATG;rbs_motif=AGGAG;rbs_spacer=5-10bp;gc_cont=0.343	MIDLNEKVTDADLEECFSLSGCHNVGWTVACSV	LANTHIPEPTIDE	ptm	metagenome
family20	3300025707.a___Ga0209667_1000465	3300025707.a___Ga0209667_1000465_17 # 19786 # 19887 # 1 # ID=465_17;partial=00;start_type=ATG;rbs_motif=AGGAG;rbs_spacer=5-10bp;gc_cont=0.343	MIDLNEKVTDADLEECFSLSGCHNVGWTVACSV	LANTHIPEPTIDE	ptm	metagenome
family20	3300025712.a___Ga0209305_1001343	3300025712.a___Ga0209305_1001343_3 # 1586 # 1687 # -1 # ID=1343_3;partial=00;start_type=ATG;rbs_motif=AGGAG;rbs_spacer=5-10bp;gc_cont=0.353	MIDLNEEVTDADIEECFALSGCPNIGWTVACSV	LANTHIPEPTIDE	ptm	metagenome
family20	3300025770.a___Ga0209362_1000775	3300025770.a___Ga0209362_1000775_6 # 6718 # 6819 # -1 # ID=775_6;partial=00;start_type=ATG;rbs_motif=AGGAG;rbs_spacer=5-10bp;gc_cont=0.343	MIDLNEKVTDADLEECFSLSGCHNVGWTVACSV	LANTHIPEPTIDE	ptm	metagenome
family20	3300025809.a___Ga0209199_1037961	3300025809.a___Ga0209199_1037961_2 # 915 # 1016 # 1 # ID=37961_2;partial=00;start_type=ATG;rbs_motif=AGGAG;rbs_spacer=5-10bp;gc_cont=0.353	MIDLNEEVTDADIEECFALSGCPNIGWTVACSV	LANTHIPEPTIDE	/	metagenome
family20	3300025821.a___Ga0209600_1005106	3300025821.a___Ga0209600_1005106_5 # 3569 # 3670 # 1 # ID=5106_5;partial=00;start_type=ATG;rbs_motif=AGGAG;rbs_spacer=5-10bp;gc_cont=0.353	MIDLNEEVTDADIEECFALSGCPNIGWTVACSV	LANTHIPEPTIDE	/	metagenome
family20	3300025860.a___Ga0209119_1001610	3300025860.a___Ga0209119_1001610_12 # 15347 # 15448 # 1 # ID=1610_12;partial=00;start_type=ATG;rbs_motif=AGGAG;rbs_spacer=5-10bp;gc_cont=0.353	MIDLNEEVTDADIEECFALSGCPNIGWTVACSV	LANTHIPEPTIDE	ptm	metagenome
family20	3300025876.a___Ga0209223_10013629	3300025876.a___Ga0209223_10013629_3 # 2046 # 2147 # 1 # ID=13629_3;partial=00;start_type=ATG;rbs_motif=AGGAG;rbs_spacer=5-10bp;gc_cont=0.353	MIDLNEEVTDADIEECFALSGCPNIGWTVACSV	LANTHIPEPTIDE	/	metagenome
family20	3300027813.a___Ga0209090_10104562	3300027813.a___Ga0209090_10104562_2 # 898 # 999 # 1 # ID=104562_2;partial=00;start_type=ATG;rbs_motif=GGAG/GAGG;rbs_spacer=5-10bp;gc_cont=0.373	MNNLNETVTDEELEECFVMSGCHNVGWTVACSV	LANTHIPEPTIDE	/	metagenome
family20	3300028173.a___Ga0257118_1000364	3300028173.a___Ga0257118_1000364_26 # 24879 # 24980 # -1 # ID=364_26;partial=00;start_type=ATG;rbs_motif=AGGAG;rbs_spacer=5-10bp;gc_cont=0.343	MIDLNEKVTDADLEECFSLSGCHNVGWTVACSV	LANTHIPEPTIDE	ptm	metagenome
family20	3300028189.a___Ga0257127_1000461	3300028189.a___Ga0257127_1000461_26 # 26207 # 26308 # 1 # ID=461_26;partial=00;start_type=ATG;rbs_motif=AGGAG;rbs_spacer=5-10bp;gc_cont=0.343	MIDLNEKVTDADLEECFSLSGCHNVGWTVACSV	LANTHIPEPTIDE	ptm	metagenome
family20	3300028198.a___Ga0257121_1000483	3300028198.a___Ga0257121_1000483_23 # 23415 # 23516 # 1 # ID=483_23;partial=00;start_type=ATG;rbs_motif=AGGAG;rbs_spacer=5-10bp;gc_cont=0.343	MIDLNEKVTDADLEECFSLSGCHNVGWTVACSV	LANTHIPEPTIDE	ptm	metagenome
family20	3300028277.a___Ga0257116_1000393	3300028277.a___Ga0257116_1000393_15 # 14951 # 15052 # -1 # ID=393_15;partial=00;start_type=ATG;rbs_motif=AGGAG;rbs_spacer=5-10bp;gc_cont=0.343	MIDLNEKVTDADLEECFSLSGCHNVGWTVACSV	LANTHIPEPTIDE	ptm	metagenome
family20	3300028287.a___Ga0257126_1000481	3300028287.a___Ga0257126_1000481_22 # 22898 # 22999 # 1 # ID=481_22;partial=00;start_type=ATG;rbs_motif=AGGAG;rbs_spacer=5-10bp;gc_cont=0.343	MIDLNEKVTDADLEECFSLSGCHNVGWTVACSV	LANTHIPEPTIDE	ptm	metagenome
family20	TARA_B110000483_G_scaffold2382_1	TARA_B110000483_G_scaffold2382_1_6 # 5440 # 5541 # 1 # ID=1227_6;partial=00;start_type=ATG;rbs_motif=GGAG/GAGG;rbs_spacer=5-10bp;gc_cont=0.373	MNNLNETVTDEELEECFVMSGCHNVGWTVACSV	LANTHIPEPTIDE	/	metagenome
family20	k117_3707179	k117_3707179_9 # 9831 # 9932 # 1 # ID=1716705_9;partial=00;start_type=ATG;rbs_motif=GGAG/GAGG;rbs_spacer=5-10bp;gc_cont=0.373	MNNLNETVTDEELEECFVMSGCHNVGWTVACSV	LANTHIPEPTIDE	ptm	metagenome
family20	k117_3844099	k117_3844099_9 # 12005 # 12106 # 1 # ID=230373_9;partial=00;start_type=ATG;rbs_motif=GGAG/GAGG;rbs_spacer=5-10bp;gc_cont=0.373	MNNLNETVTDEELEECFVMSGCHNVGWTVACSV	LANTHIPEPTIDE	ptm	metagenome
family20	k117_943222	k117_943222_2 # 529 # 630 # -1 # ID=23448_2;partial=00;start_type=ATG;rbs_motif=GGAG/GAGG;rbs_spacer=5-10bp;gc_cont=0.373	MNNLNETVTDEELEECFVMSGCHNVGWTVACSV	LANTHIPEPTIDE	ptm	metagenome
family20	k117_3958704	k117_3958704_2 # 468 # 569 # 1 # ID=222765_2;partial=00;start_type=ATG;rbs_motif=GGAG/GAGG;rbs_spacer=5-10bp;gc_cont=0.382	MNNLNETVTDEELEECFAMSGCHNVGWTVACSV	LANTHIPEPTIDE	/	metagenome
family20	TARA_SAMEA4397903_METAG-scaffold_29247	TARA_SAMEA4397903_METAG-scaffold_29247_1 # 412 # 513 # -1 # ID=165048_1;partial=00;start_type=ATG;rbs_motif=GGAG/GAGG;rbs_spacer=5-10bp;gc_cont=0.382	MNNLNETVTDEELEECFAMSGCHNVGWTVACSV	LANTHIPEPTIDE	/	metagenome
family20	TARA_SAMEA4397034_METAG-scaffold_74592	TARA_SAMEA4397034_METAG-scaffold_74592_2 # 248 # 349 # 1 # ID=668763_2;partial=00;start_type=ATG;rbs_motif=GGAG/GAGG;rbs_spacer=5-10bp;gc_cont=0.373	MNNLNETVTDEELEECFVMSGCHNVGWTVACSV	LANTHIPEPTIDE	/	metagenome
family20	TARA_SAMEA4397516_METAG-scaffold_88312	TARA_SAMEA4397516_METAG-scaffold_88312_3 # 1342 # 1443 # 1 # ID=475054_3;partial=00;start_type=ATG;rbs_motif=GGAG/GAGG;rbs_spacer=5-10bp;gc_cont=0.373	MNNLNETVTDEELEECFVMSGCHNVGWTVACSV	LANTHIPEPTIDE	/	metagenome
family20	TARA_SAMEA4397239_METAG-scaffold_6518	TARA_SAMEA4397239_METAG-scaffold_6518_8 # 7996 # 8097 # 1 # ID=59613_8;partial=00;start_type=ATG;rbs_motif=GGAG/GAGG;rbs_spacer=5-10bp;gc_cont=0.373	MNNLNETVTDEELEECFVMSGCHNVGWTVACSV	LANTHIPEPTIDE	ptm	metagenome
family20	TARA_SAMEA4398176_METAG-scaffold_4780	TARA_SAMEA4398176_METAG-scaffold_4780_9 # 12321 # 12422 # 1 # ID=39977_9;partial=00;start_type=ATG;rbs_motif=GGAG/GAGG;rbs_spacer=5-10bp;gc_cont=0.373	MNNLNETVTDEELEECFVMSGCHNVGWTVACSV	LANTHIPEPTIDE	ptm	metagenome
family20	TARA_SAMEA4397930_METAG-scaffold_107651	TARA_SAMEA4397930_METAG-scaffold_107651_3 # 1279 # 1380 # -1 # ID=569163_3;partial=00;start_type=ATG;rbs_motif=GGAG/GAGG;rbs_spacer=5-10bp;gc_cont=0.373	MNNLNETVTDEELEECFVMSGCHNVGWTVACSV	LANTHIPEPTIDE	/	metagenome
family20	TARA_178_SRF_0.22-3_k119_40768	TARA_178_SRF_0.22-3_k119_40768_1 # 184 # 285 # -1 # ID=3573256_1;partial=00;start_type=ATG;rbs_motif=GGAG/GAGG;rbs_spacer=5-10bp;gc_cont=0.373	MNNLNETVTDEELEECFVLSGCHNVGWTVACSV	LANTHIPEPTIDE	/	metagenome
family21	3300000226.a___SI34jun09_135mDRAFT_1025471	3300000226.a___SI34jun09_135mDRAFT_1025471_1 # 38 # 157 # -1 # ID=106772_1;partial=00;start_type=ATG;rbs_motif=AGGAG;rbs_spacer=5-10bp;gc_cont=0.442	MKTSIFDMNFTLPPLVEMTEVVKDMGSVEMTTPGPDNNC	LASSO_PEPTIDE	/	metagenome
family21	3300000226.a___SI34jun09_135mDRAFT_1025471	3300000226.a___SI34jun09_135mDRAFT_1025471_3 # 297 # 416 # -1 # ID=106772_3;partial=00;start_type=ATG;rbs_motif=AGGAG;rbs_spacer=5-10bp;gc_cont=0.442	MKTSIFDMNFTLPPLVEMTEVVKDMGSVEMTTPGPDNNC	LASSO_PEPTIDE	/	metagenome
family21	3300022931.a___Ga0233433_10010019	3300022931.a___Ga0233433_10010019_3 # 280 # 399 # 1 # ID=10019_3;partial=00;start_type=ATG;rbs_motif=AGGAG;rbs_spacer=5-10bp;gc_cont=0.450	MKTSIFDMNFTLPPLVEMTEVVKDMGSVEMTTPGPDNNC	LASSO_PEPTIDE	/	metagenome
family21	3300022933.a___Ga0233427_10043440	3300022933.a___Ga0233427_10043440_9 # 1613 # 1732 # 1 # ID=43440_9;partial=00;start_type=ATG;rbs_motif=AGGAG;rbs_spacer=5-10bp;gc_cont=0.458	MKTSIFDMNFTLPPLVEMTEVVKDMGSVEMTTPGPDNNC	LASSO_PEPTIDE	/	metagenome
family21	3300022933.a___Ga0233427_10043440	3300022933.a___Ga0233427_10043440_12 # 2156 # 2275 # 1 # ID=43440_12;partial=00;start_type=ATG;rbs_motif=AGGAG;rbs_spacer=5-10bp;gc_cont=0.450	MKTSIFDMNFTLPPLVEMTEVVKDMGSVEMTTPGPDNNC	LASSO_PEPTIDE	/	metagenome
family21	3300025643.a___Ga0209151_1021025	3300025643.a___Ga0209151_1021025_4 # 1746 # 1865 # -1 # ID=21025_4;partial=00;start_type=ATG;rbs_motif=AGGAG;rbs_spacer=5-10bp;gc_cont=0.450	MKTSIFDMNFTLPPLVEMTEVVKDMGSVEMTTPGPDNNC	LASSO_PEPTIDE	/	metagenome
family22	3300000171.a___SI47jul10_200mDRAFT_c1008082	3300000171.a___SI47jul10_200mDRAFT_c1008082_3 # 788 # 889 # 1 # ID=2425_3;partial=00;start_type=ATG;rbs_motif=TAAAAA;rbs_spacer=9bp;gc_cont=0.343	MIVFLDDVKMKIVGNYSALMFETALSDGYLFRC	LANTHIPEPTIDE	/	metagenome
family22	3300000174.a___SI60aug11_200mDRAFT_c1023131	3300000174.a___SI60aug11_200mDRAFT_c1023131_2 # 295 # 396 # 1 # ID=68545_2;partial=00;start_type=ATG;rbs_motif=TAAAAA;rbs_spacer=9bp;gc_cont=0.343	MIVFLDDVKMKIVGNYSALMFETALSDGYLFRC	LANTHIPEPTIDE	/	metagenome
family22	3300024336.a___Ga0233447_1012059	3300024336.a___Ga0233447_1012059_5 # 3319 # 3420 # 1 # ID=12059_5;partial=00;start_type=ATG;rbs_motif=TAAAAA;rbs_spacer=9bp;gc_cont=0.343	MIVFLDDVKMKIVGNYSALMFETALSDGYLFRC	LANTHIPEPTIDE	/	metagenome
family22	3300025602_5	3300025602.a___Ga0209361_1007779_3 # 3191 # 3292 # -1 # ID=7779_3;partial=00;start_type=ATG;rbs_motif=AAAAA;rbs_spacer=9bp;gc_cont=0.333	MIVFLDDVKMKIVGNYSALMFETALSDGYLFRC	LANTHIPEPTIDE	/	metagenome
family22	3300025644_7	3300025644.a___Ga0209042_1010299_4 # 3533 # 3634 # -1 # ID=10299_4;partial=00;start_type=ATG;rbs_motif=AAAAA;rbs_spacer=9bp;gc_cont=0.333	MIVFLDDVKMKIVGNYSALMFETALSDGYLFRC	LANTHIPEPTIDE	/	metagenome
family22	3300028188_5	3300028188.a___Ga0257124_1008913_5 # 3319 # 3417 # 1 # ID=8913_5;partial=00;start_type=ATG;rbs_motif=TAAAAA;rbs_spacer=12bp;gc_cont=0.354	MVFLDDVKMKIVGNYSALMFETALSDGYLFRC	LANTHIPEPTIDE	/	metagenome
family23	3300000164.a___SI39no09_200mDRAFT_c1003388	3300000164.a___SI39no09_200mDRAFT_c1003388_8 # 4546 # 4665 # -1 # ID=847_8;partial=00;start_type=ATG;rbs_motif=GGA/GAG/AGG;rbs_spacer=5-10bp;gc_cont=0.358	MMLNIDDFNQLVTKLVAKECDWNTYSGKFFLCACGGVSN	LANTHIPEPTIDE	/	metagenome
family23	3300000212.a___SI47jul10_120mDRAFT_c1002456	3300000212.a___SI47jul10_120mDRAFT_c1002456_7 # 3180 # 3299 # 1 # ID=55282_7;partial=00;start_type=ATG;rbs_motif=GGA/GAG/AGG;rbs_spacer=5-10bp;gc_cont=0.358	MMLNIDDFNQLVTKLVAKECDWNTYSGKFFLCACGGVSN	LANTHIPEPTIDE	/	metagenome
family23	3300000239.a___SI36aug09_120mDRAFT_1002141	3300000239.a___SI36aug09_120mDRAFT_1002141_10 # 6634 # 6753 # -1 # ID=185042_10;partial=00;start_type=ATG;rbs_motif=GGA/GAG/AGG;rbs_spacer=5-10bp;gc_cont=0.358	MMLNIDDFNQLVTKLVAKECDWNTYSGKFFLCACGGVSN	LANTHIPEPTIDE	/	metagenome
family23	3300025478.a___Ga0209576_1003741	3300025478.a___Ga0209576_1003741_6 # 3687 # 3803 # -1 # ID=3741_6;partial=00;start_type=ATG;rbs_motif=GGA/GAG/AGG;rbs_spacer=5-10bp;gc_cont=0.368	MLNIDDFNQLVTKLVAKECDWNTYSGKFFLCACGGVSN	LANTHIPEPTIDE	/	metagenome
family23	3300025596.a___Ga0209662_1003615	3300025596.a___Ga0209662_1003615_7 # 4576 # 4692 # -1 # ID=3615_7;partial=00;start_type=ATG;rbs_motif=GGA/GAG/AGG;rbs_spacer=5-10bp;gc_cont=0.368	MLNIDDFNQLVTKLVAKECDWNTYSGKFFLCACGGVSN	LANTHIPEPTIDE	/	metagenome
family23	3300025707.a___Ga0209667_1004542	3300025707.a___Ga0209667_1004542_9 # 5050 # 5169 # -1 # ID=4542_9;partial=00;start_type=ATG;rbs_motif=GGA/GAG/AGG;rbs_spacer=5-10bp;gc_cont=0.358	MMLNIDDFNQLVTKLVAKECDWNTYSGKFFLCACGGVSN	LANTHIPEPTIDE	/	metagenome
family23	3300025722.a___Ga0209660_1002481	3300025722.a___Ga0209660_1002481_9 # 5257 # 5376 # 1 # ID=2481_9;partial=00;start_type=ATG;rbs_motif=GGA/GAG/AGG;rbs_spacer=5-10bp;gc_cont=0.358	MMLNIDDFNQLVTKLVAKECDWNTYSGKFFLCACGGVSN	LANTHIPEPTIDE	/	metagenome
family23	3300025727.a___Ga0209047_1004131	3300025727.a___Ga0209047_1004131_8 # 5243 # 5359 # -1 # ID=4131_8;partial=00;start_type=ATG;rbs_motif=GGA/GAG/AGG;rbs_spacer=5-10bp;gc_cont=0.368	MLNIDDFNQLVTKLVAKECDWNTYSGKFFLCACGGVSN	LANTHIPEPTIDE	/	metagenome
family23	3300028175.a___Ga0257117_1005591	3300028175.a___Ga0257117_1005591_7 # 3687 # 3806 # -1 # ID=5591_7;partial=00;start_type=ATG;rbs_motif=GGA/GAG/AGG;rbs_spacer=5-10bp;gc_cont=0.358	MMLNIDDFNQLVTKLVAKECDWNTYSGKFFLCACGGVSN	LANTHIPEPTIDE	/	metagenome
family24	3300000115.a___DelMOSum2011_c10002061	3300000115.a___DelMOSum2011_c10002061_13 # 8929 # 9051 # 1 # ID=109065_13;partial=00;start_type=ATG;rbs_motif=TATAA;rbs_spacer=12bp;gc_cont=0.333	MKNISLSNSCVNCVNHTENKCSVHEVEVTASNTCDTFTNA	rSAM_MODIFIED_RiPP	/	metagenome
family24	3300024264.a___Ga0233444_10014500	3300024264.a___Ga0233444_10014500_8 # 5251 # 5373 # 1 # ID=14500_8;partial=00;start_type=ATG;rbs_motif=TAA;rbs_spacer=12bp;gc_cont=0.350	MDNISMSNSCINCVNHEANKCGVHQVEVTAANTCDTFTNA	rSAM_MODIFIED_RiPP	/	metagenome
family24	3300025886.a___Ga0209632_10032614	3300025886.a___Ga0209632_10032614_2 # 1211 # 1333 # -1 # ID=32614_2;partial=00;start_type=ATG;rbs_motif=AAAAA;rbs_spacer=11bp;gc_cont=0.317	MKNISLSNSCVNCVNHTENKCSVHEVEVTASNTCDTFTNA	rSAM_MODIFIED_RiPP	/	metagenome
family24	3300025894.a___Ga0209335_10001792	3300025894.a___Ga0209335_10001792_3 # 2020 # 2142 # 1 # ID=1792_3;partial=00;start_type=ATG;rbs_motif=AAAAA;rbs_spacer=11bp;gc_cont=0.325	MKNISLSNSCVNCVNHTENKCSVHEVEVTASNTCDTFTNA	rSAM_MODIFIED_RiPP	/	metagenome
family24	3300027506.a___Ga0208973_1002938	3300027506.a___Ga0208973_1002938_2 # 444 # 566 # -1 # ID=2938_2;partial=00;start_type=ATG;rbs_motif=TATAA;rbs_spacer=12bp;gc_cont=0.317	MKNISLSNSCVNCVNHTENKCSVHEVEVTASNTCDTFTNA	rSAM_MODIFIED_RiPP	/	metagenome
family24	3300028287.a___Ga0257126_1009582	3300028287.a___Ga0257126_1009582_5 # 4430 # 4552 # -1 # ID=9582_5;partial=00;start_type=ATG;rbs_motif=TAA;rbs_spacer=12bp;gc_cont=0.325	MDNISMSNSCINCVNHEANKCGVHQVEVTAANTCDTFTNA	rSAM_MODIFIED_RiPP	/	metagenome
family24	3300028287.a___Ga0257126_1023244	3300028287.a___Ga0257126_1023244_2 # 2106 # 2228 # -1 # ID=23244_2;partial=00;start_type=ATG;rbs_motif=TAA;rbs_spacer=12bp;gc_cont=0.341	MDNISMSNSCINCVNHEANKCGVHQVEVTAANTCDTFTNA	rSAM_MODIFIED_RiPP	/	metagenome
family24	TARA_B100001059_G_scaffold9704_1	TARA_B100001059_G_scaffold9704_1_2 # 89 # 211 # -1 # ID=3853_2;partial=00;start_type=ATG;rbs_motif=TAA;rbs_spacer=12bp;gc_cont=0.341	MDNISMSNSCINCVNHEANKCGVHQVEVTAANTCDTFTNA	rSAM_MODIFIED_RiPP	/	metagenome
family24	TARA_SAMEA2620980_METAG-scaffold_227486	TARA_SAMEA2620980_METAG-scaffold_227486_2 # 231 # 353 # -1 # ID=1117455_2;partial=00;start_type=ATG;rbs_motif=TAA;rbs_spacer=12bp;gc_cont=0.285	MKKITQSNSCVNCVNLAENKCSVHNVEVTASNTCDTFTTS	rSAM_MODIFIED_RiPP	/	metagenome
family24	TARA_SAMEA2623116_METAG-scaffold_47966	TARA_SAMEA2623116_METAG-scaffold_47966_3 # 1949 # 2071 # -1 # ID=171605_3;partial=00;start_type=ATG;rbs_motif=TAAA;rbs_spacer=8bp;gc_cont=0.301	MKKITQSNSCVNCVNLAENECSVHNVEVTASNTCDTFTTS	rSAM_MODIFIED_RiPP	/	metagenome
family24	TARA_SAMEA4396538_METAG_AFCJMCDO	TARA_SAMEA4396538_METAG-scaffold_2977_3 # 2162 # 2284 # 1 # ID=37277_3;partial=00;start_type=ATG;rbs_motif=AAAAA;rbs_spacer=11bp;gc_cont=0.325	MKNISLSNSCVNCVNHTENKCSVHEVEVTASNTCDTFTNA	rSAM_MODIFIED_RiPP	/	metagenome
family25	TARA_SAMEA2591122_BIN_00000197	TARA_SAMEA2591122_METAG-scaffold_156164_2 # 333 # 533 # -1 # ID=649205_2;partial=00;start_type=ATG;rbs_motif=AGGAG;rbs_spacer=5-10bp;gc_cont=0.388	MSKDWEKGQAYVKAPKITKELGVGKDGYQTGGVTIEATNPDETQTVTVRGTRAMRADKKPVKAKWY	LASSO_PEPTIDE	/	metagenome
family25	BGEO_SAMN07136937_BIN_00000083	BGEO_SAMN07136937_METAG-scaffold_67348_1 # 59 # 259 # -1 # ID=487506_1;partial=00;start_type=ATG;rbs_motif=AGGAG;rbs_spacer=5-10bp;gc_cont=0.373	MDKNWMRGQTYTKAPKIEKELGVGKDGYQTGGVTIEATDPNETQTVDVRGTKAMRADKKPVKAKWY	LASSO_PEPTIDE	/	metagenome
family25	GCA_902600995.1	CACKLI010000001.1_3 # 3895 # 4095 # 1 # ID=50197_3;partial=00;start_type=ATG;rbs_motif=AGGAG;rbs_spacer=5-10bp;gc_cont=0.388	MDKDWQRGQAYVKAPKVTKELGVGKDGYQTGGVTIEATNPDETQTVTVRGTKAMRADKKPVKAKWY	LASSO_PEPTIDE	/	metagenome
family26	3300000115.a___DelMOSum2011_c10021557	3300000115.a___DelMOSum2011_c10021557_3 # 838 # 906 # 1 # ID=165014_3;partial=00;start_type=ATG;rbs_motif=AATAA;rbs_spacer=4bp;gc_cont=0.319	MDVKELRDQDVTQLNESSLSLC	OTHER	/	metagenome
family27	3300000115.a___DelMOSum2011_c10048941	3300000115.a___DelMOSum2011_c10048941_2 # 669 # 821 # 1 # ID=221582_2;partial=00;start_type=ATG;rbs_motif=AGGA;rbs_spacer=5-10bp;gc_cont=0.281	MENKITSIWNKIKSTRDTFSKIALTKELDELVTKYKNELITKFQREKKWT	rSAM_MODIFIED_RiPP	/	metagenome
family27	3300026204.a___Ga0208521_1034999	3300026204.a___Ga0208521_1034999_3 # 503 # 655 # -1 # ID=34999_3;partial=00;start_type=ATG;rbs_motif=AGGA;rbs_spacer=5-10bp;gc_cont=0.275	MENKITSIWNKIKSTRDTFSKIALTKELDELVTKYKNELITKFQREKKWT	rSAM_MODIFIED_RiPP	/	metagenome
family28	3300000115.a___DelMOSum2011_c10002989	3300000115.a___DelMOSum2011_c10002989_2 # 182 # 361 # 1 # ID=272502_2;partial=00;start_type=ATG;rbs_motif=GGA/GAG/AGG;rbs_spacer=5-10bp;gc_cont=0.411	MKNSKSDRIKAAAHRALEEAHNRKKELEETKLDLELGGPKGLEPTRFGDWERKGIASDF	LASSO_PEPTIDE	/	metagenome
family28	3300000115.a___DelMOSum2011_c10000374	3300000115.a___DelMOSum2011_c10000374_1 # 108 # 287 # 1 # ID=326751_1;partial=00;start_type=ATG;rbs_motif=GGA/GAG/AGG;rbs_spacer=5-10bp;gc_cont=0.400	MKNSKSDRIKAAALRALEEARNRKKEIEEPKLDLELGGPKGLEPTRFGDWERKGIASDF	LASSO_PEPTIDE	/	metagenome
family28	3300000116.a___DelMOSpr2010_c10002627	3300000116.a___DelMOSpr2010_c10002627_11 # 10071 # 10250 # -1 # ID=163909_11;partial=00;start_type=ATG;rbs_motif=GGA/GAG/AGG;rbs_spacer=5-10bp;gc_cont=0.411	MKNSKSDRIKAAAHRALEEAHNRKKELEETKLDLELGGPKGLEPTRFGDWERKGIASDF	LASSO_PEPTIDE	/	metagenome
family28	3300000116.a___DelMOSpr2010_c10000263	3300000116.a___DelMOSpr2010_c10000263_1 # 110 # 289 # 1 # ID=540397_1;partial=00;start_type=ATG;rbs_motif=GGA/GAG/AGG;rbs_spacer=5-10bp;gc_cont=0.400	MKNSKSDRIKAAALRALEEARNRKKEIEEPKLDLELGGPKGLEPTRFGDWERKGIASDF	LASSO_PEPTIDE	/	metagenome
family28	3300000101.a___DelMOSum2010_c10000954	3300000101.a___DelMOSum2010_c10000954_21 # 23861 # 24040 # -1 # ID=110359_21;partial=00;start_type=ATG;rbs_motif=GGA/GAG/AGG;rbs_spacer=5-10bp;gc_cont=0.400	MKNSKSDRIKAAALRALEEARNRKKEIEEPKLDLELGGPKGLEPTRFGDWERKGIASDF	LASSO_PEPTIDE	/	metagenome
family28	3300000223.a___LPjun09P410mDRAFT_1002820	3300000223.a___LPjun09P410mDRAFT_1002820_2 # 1242 # 1421 # 1 # ID=60086_2;partial=00;start_type=ATG;rbs_motif=TAAAA;rbs_spacer=4bp;gc_cont=0.400	MKNSKSDRIKAAAHRALEEAHNRKKELEETKLDLELGGPKGLEPTRFGDWERKGIASDF	LASSO_PEPTIDE	/	metagenome
family28	3300000224.a___SI34jun09_10mDRAFT_1000127	3300000224.a___SI34jun09_10mDRAFT_1000127_11 # 9118 # 9297 # 1 # ID=57073_11;partial=00;start_type=ATG;rbs_motif=GGA/GAG/AGG;rbs_spacer=5-10bp;gc_cont=0.394	MKNSKSDRIKAAAHRALEEAHNRKKELEETKLDLELGGPKGLEPTRFGDWERKGIASDF	LASSO_PEPTIDE	/	metagenome
family28	3300000225.a___SI34jun09_120mDRAFT_1000041	3300000225.a___SI34jun09_120mDRAFT_1000041_22 # 23864 # 24043 # 1 # ID=216309_22;partial=00;start_type=ATG;rbs_motif=GGA/GAG/AGG;rbs_spacer=5-10bp;gc_cont=0.406	MKNSKSDRIKAAAHRALEEAHNRKKELEETKLDLELGGPKGLEPTRFGDWERKGIASDF	LASSO_PEPTIDE	/	metagenome
family28	3300000265.a___LP_A_09_P04_10DRAFT_1000033	3300000265.a___LP_A_09_P04_10DRAFT_1000033_30 # 33992 # 34171 # -1 # ID=8_30;partial=00;start_type=ATG;rbs_motif=GGA/GAG/AGG;rbs_spacer=5-10bp;gc_cont=0.406	MKNSKSDRIKAAAHRALEEAHNRKKELEETKLDLELGGPKGLEPTRFGDWERKGIASDF	LASSO_PEPTIDE	/	metagenome
family28	3300000324.a___SI48aug10_100mDRAFT_1000039	3300000324.a___SI48aug10_100mDRAFT_1000039_29 # 32904 # 33083 # -1 # ID=107690_29;partial=00;start_type=ATG;rbs_motif=GGA/GAG/AGG;rbs_spacer=5-10bp;gc_cont=0.411	MKNSKSDRIKAAAHRALEEAHNRKKELEETKLDLELGGPKGLEPTRFGDWERKGIASDF	LASSO_PEPTIDE	/	metagenome
family28	3300020187.a___Ga0206130_10000626	3300020187.a___Ga0206130_10000626_29 # 33435 # 33614 # -1 # ID=626_29;partial=00;start_type=ATG;rbs_motif=GGA/GAG/AGG;rbs_spacer=5-10bp;gc_cont=0.406	MKNSKSDRIKAAAHRALEEAHNRKKELEETKLDLELGGPKGLEPTRFGDWERKGIASDF	LASSO_PEPTIDE	/	metagenome
family28	3300020335.a___Ga0211690_1000044	3300020335.a___Ga0211690_1000044_30 # 33729 # 33908 # -1 # ID=44_30;partial=00;start_type=ATG;rbs_motif=GGA/GAG/AGG;rbs_spacer=5-10bp;gc_cont=0.400	MKNSKSDRIKAAALRALEEARNRKKEIEEPKLDLELGGPKGLEPTRFGDWERKGIASDF	LASSO_PEPTIDE	/	metagenome
family28	3300020358.a___Ga0211689_1000066	3300020358.a___Ga0211689_1000066_30 # 33664 # 33843 # -1 # ID=66_30;partial=00;start_type=ATG;rbs_motif=GGA/GAG/AGG;rbs_spacer=5-10bp;gc_cont=0.400	MKNSKSDRIKAAALRALEEARNRKKEIEEPKLDLELGGPKGLEPTRFGDWERKGIASDF	LASSO_PEPTIDE	/	metagenome
family28	3300020358.a___Ga0211689_1000216	3300020358.a___Ga0211689_1000216_3 # 2436 # 2615 # 1 # ID=216_3;partial=00;start_type=ATG;rbs_motif=GGA/GAG/AGG;rbs_spacer=5-10bp;gc_cont=0.394	MKNSKSDRIKAAAHRALEEAHNRKKELEETKLDLELGGPKGLEPTRFGDWERKGIASDF	LASSO_PEPTIDE	/	metagenome
family28	3300020396.a___Ga0211687_10000280	3300020396.a___Ga0211687_10000280_29 # 32993 # 33172 # -1 # ID=280_29;partial=00;start_type=ATG;rbs_motif=GGA/GAG/AGG;rbs_spacer=5-10bp;gc_cont=0.400	MKNSKSDRIKAAAHRALEEAHNRKKELEETKLDLELGGPKGLEPTRFGDWERKGIASDF	LASSO_PEPTIDE	/	metagenome
family28	3300022931.a___Ga0233433_10000402	3300022931.a___Ga0233433_10000402_19 # 22024 # 22203 # -1 # ID=402_19;partial=00;start_type=ATG;rbs_motif=GGA/GAG/AGG;rbs_spacer=5-10bp;gc_cont=0.411	MKNSKSDRIKAAAHRALEEAHNRKKELEETKLDLELGGPKGLEPTRFGDWERKGIASDF	LASSO_PEPTIDE	/	metagenome
family28	3300024183.a___Ga0228603_1000530	3300024183.a___Ga0228603_1000530_2 # 581 # 760 # 1 # ID=530_2;partial=00;start_type=ATG;rbs_motif=GGA/GAG/AGG;rbs_spacer=5-10bp;gc_cont=0.400	MKNSKSDRIKAAAHRALEEAHNRKKELEETKLDLELGGPKGLEPTRFGDWERKGIASDF	LASSO_PEPTIDE	/	metagenome
family28	3300024235.a___Ga0228665_1000046	3300024235.a___Ga0228665_1000046_10 # 9814 # 9993 # 1 # ID=46_10;partial=00;start_type=ATG;rbs_motif=GGA/GAG/AGG;rbs_spacer=5-10bp;gc_cont=0.400	MKNSKSDRIKAAAHRALEEAHNRKKELEETKLDLELGGPKGLEPTRFGDWERKGIASDF	LASSO_PEPTIDE	/	metagenome
family28	3300024244.a___Ga0228678_1000195	3300024244.a___Ga0228678_1000195_3 # 2807 # 2986 # 1 # ID=195_3;partial=00;start_type=ATG;rbs_motif=GGA/GAG/AGG;rbs_spacer=5-10bp;gc_cont=0.400	MKNSKSDRIKAAAHRALEEAHNRKKELEETKLDLELGGPKGLEPTRFGDWERKGIASDF	LASSO_PEPTIDE	/	metagenome
family28	3300024255.a___Ga0233438_10001007	3300024255.a___Ga0233438_10001007_11 # 10806 # 10985 # 1 # ID=1007_11;partial=00;start_type=ATG;rbs_motif=GGA/GAG/AGG;rbs_spacer=5-10bp;gc_cont=0.406	MKNSKSDRIKAAAHRALEEAHNRKKELEETKLDLELGGPKGLEPTRFGDWERKGIASDF	LASSO_PEPTIDE	/	metagenome
family28	3300025508.a___Ga0208148_1008697	3300025508.a___Ga0208148_1008697_4 # 1409 # 1588 # -1 # ID=8697_4;partial=00;start_type=ATG;rbs_motif=GGA/GAG/AGG;rbs_spacer=5-10bp;gc_cont=0.400	MKNSKSDRIKAAALRALEEARNRKKEIEEPKLDLELGGPKGLEPTRFGDWERKGIASDF	LASSO_PEPTIDE	/	metagenome
family28	3300025641.a___Ga0209833_1000105	3300025641.a___Ga0209833_1000105_29 # 33435 # 33614 # -1 # ID=105_29;partial=00;start_type=ATG;rbs_motif=GGA/GAG/AGG;rbs_spacer=5-10bp;gc_cont=0.406	MKNSKSDRIKAAAHRALEEAHNRKKELEETKLDLELGGPKGLEPTRFGDWERKGIASDF	LASSO_PEPTIDE	/	metagenome
family28	3300025668.a___Ga0209251_1000495	3300025668.a___Ga0209251_1000495_29 # 33353 # 33532 # -1 # ID=495_29;partial=00;start_type=ATG;rbs_motif=GGA/GAG/AGG;rbs_spacer=5-10bp;gc_cont=0.411	MKNSKSDRIKAAAHRALEEAHNRKKELEETKLDLELGGPKGLEPTRFGDWERKGIASDF	LASSO_PEPTIDE	/	metagenome
family28	3300025809.a___Ga0209199_1000449	3300025809.a___Ga0209199_1000449_30 # 33786 # 33965 # -1 # ID=449_30;partial=00;start_type=ATG;rbs_motif=GGA/GAG/AGG;rbs_spacer=5-10bp;gc_cont=0.400	MKNSKSDRIKAAALRALEEARNRKKEIEEPKLDLELGGPKGLEPTRFGDWERKGIASDF	LASSO_PEPTIDE	/	metagenome
family28	3300025892.a___Ga0209630_10000301	3300025892.a___Ga0209630_10000301_29 # 33380 # 33559 # -1 # ID=301_29;partial=00;start_type=ATG;rbs_motif=GGA/GAG/AGG;rbs_spacer=5-10bp;gc_cont=0.406	MKNSKSDRIKAAAHRALEEAHNRKKELEETKLDLELGGPKGLEPTRFGDWERKGIASDF	LASSO_PEPTIDE	/	metagenome
family28	3300026506.a___Ga0228604_1000059	3300026506.a___Ga0228604_1000059_3 # 2202 # 2381 # 1 # ID=59_3;partial=00;start_type=ATG;rbs_motif=GGA/GAG/AGG;rbs_spacer=5-10bp;gc_cont=0.400	MKNSKSDRIKAAAHRALEEAHNRKKELEETKLDLELGGPKGLEPTRFGDWERKGIASDF	LASSO_PEPTIDE	/	metagenome
family28	3300026517.a___Ga0228607_1000009	3300026517.a___Ga0228607_1000009_22 # 23771 # 23950 # 1 # ID=9_22;partial=00;start_type=ATG;rbs_motif=GGA/GAG/AGG;rbs_spacer=5-10bp;gc_cont=0.400	MKNSKSDRIKAAAHRALEEAHNRKKELEETKLDLELGGPKGLEPTRFGDWERKGIASDF	LASSO_PEPTIDE	/	metagenome
family28	3300027232.a___Ga0208803_1000099	3300027232.a___Ga0208803_1000099_19 # 22567 # 22746 # -1 # ID=99_19;partial=00;start_type=ATG;rbs_motif=GGA/GAG/AGG;rbs_spacer=5-10bp;gc_cont=0.411	MKNSKSDRIKAAAHRALEEAHNRKKELEETKLDLELGGPKGLEPTRFGDWERKGIASDF	LASSO_PEPTIDE	/	metagenome
family28	3300027253.a___Ga0208680_1000020	3300027253.a___Ga0208680_1000020_20 # 22945 # 23124 # -1 # ID=20_20;partial=00;start_type=ATG;rbs_motif=GGA/GAG/AGG;rbs_spacer=5-10bp;gc_cont=0.411	MKNSKSDRIKAAAHRALEEAHNRKKELEETKLDLELGGPKGLEPTRFGDWERKGIASDF	LASSO_PEPTIDE	/	metagenome
family28	3300027406.a___Ga0208965_1000053	3300027406.a___Ga0208965_1000053_22 # 23864 # 24043 # 1 # ID=53_22;partial=00;start_type=ATG;rbs_motif=GGA/GAG/AGG;rbs_spacer=5-10bp;gc_cont=0.400	MKNSKSDRIKAAAHRALEEAHNRKKELEETKLDLELGGPKGLEPTRFGDWERKGIASDF	LASSO_PEPTIDE	/	metagenome
family28	3300027757.a___Ga0208671_10000296	3300027757.a___Ga0208671_10000296_22 # 25632 # 25811 # -1 # ID=296_22;partial=00;start_type=ATG;rbs_motif=TAAAA;rbs_spacer=4bp;gc_cont=0.406	MKNSKSDRIKAAAHRALEEAHNRKKELEETKLDLELGGPKGLEPTRFGDWERKGIASDF	LASSO_PEPTIDE	/	metagenome
family28	TARA_R110002096_G_scaffold104769_2	TARA_R110002096_G_scaffold104769_2_12 # 14486 # 14665 # 1 # ID=84337_12;partial=00;start_type=ATG;rbs_motif=GGA/GAG/AGG;rbs_spacer=5-10bp;gc_cont=0.550	MTDTKEKRLKDAAKRALTEAEARKLAALDETQPLELGGPKGLEPTRFGDWERKGITSDF	LASSO_PEPTIDE	ptm	metagenome
family28	TARA_ARC_108_MAG_00077	TARA_ARC_108_MAG_00077_000000000069_23 # 25457 # 25636 # 1 # ID=95375_23;partial=00;start_type=ATG;rbs_motif=GGA/GAG/AGG;rbs_spacer=5-10bp;gc_cont=0.400	MKNSKSDRIKAAALRALEEARNRKKEIEEPKLDLELGGPKGLEPTRFGDWERKGIASDF	LASSO_PEPTIDE	/	metagenome
family28	TARA_PON_109_MAG_00108	TARA_PON_109_MAG_00108_000000000011_243 # 241869 # 242042 # -1 # ID=290863_243;partial=00;start_type=GTG;rbs_motif=TAAAA;rbs_spacer=4bp;gc_cont=0.368	MAKEKQPIDNPKIKTENKASNKKVPLETEITKELGGPKGLEPTRYGDWEKKGRCSDF	LASSO_PEPTIDE	/	metagenome
family28	k117_2860594	k117_2860594_37 # 40315 # 40494 # -1 # ID=166311_37;partial=00;start_type=ATG;rbs_motif=GGA/GAG/AGG;rbs_spacer=5-10bp;gc_cont=0.400	MKNSKSDRIKAAALRALEEARNRKKEIEEPKLDLELGGPKGLEPTRFGDWERKGIASDF	LASSO_PEPTIDE	/	metagenome
family28	k117_4421690	k117_4421690_25 # 25849 # 26028 # 1 # ID=289257_25;partial=00;start_type=ATG;rbs_motif=GGA/GAG/AGG;rbs_spacer=5-10bp;gc_cont=0.400	MKNSKSDRIKAAALRALEEARNRKKEIEEPKLDLELGGPKGLEPTRFGDWERKGIASDF	LASSO_PEPTIDE	/	metagenome
family28	k117_481576	k117_481576_23 # 25356 # 25535 # 1 # ID=11441_23;partial=00;start_type=ATG;rbs_motif=GGA/GAG/AGG;rbs_spacer=5-10bp;gc_cont=0.400	MKNSKSDRIKAAALRALEEARNRKKEIEEPKLDLELGGPKGLEPTRFGDWERKGIASDF	LASSO_PEPTIDE	/	metagenome
family28	TARA_SAMEA2623135_METAG_INFNDBEE	TARA_SAMEA2623135_METAG-scaffold_3341_6 # 4432 # 4605 # -1 # ID=34219_6;partial=00;start_type=GTG;rbs_motif=TAAAA;rbs_spacer=4bp;gc_cont=0.368	MAKEKQPIDNPKIKTENKASNKKVPLETEITKELGGPKGLEPTRYGDWEKKGRCSDF	LASSO_PEPTIDE	/	metagenome
family28	TARA_SAMEA4397409_METAG_CMIPNLCO	TARA_SAMEA4397409_METAG-scaffold_1597_9 # 8965 # 9144 # 1 # ID=27257_9;partial=00;start_type=ATG;rbs_motif=GGA/GAG/AGG;rbs_spacer=5-10bp;gc_cont=0.550	MTDTKEKRLKDAAKRALTEAEARKLAALDETQPLELGGPKGLEPTRFGDWERKGITSDF	LASSO_PEPTIDE	ptm	metagenome
family28	TARA_SAMEA4397196_METAG_IJOKKCJK	TARA_SAMEA4397196_METAG-scaffold_1052_2 # 328 # 507 # 1 # ID=14684_2;partial=00;start_type=ATG;rbs_motif=GGA/GAG/AGG;rbs_spacer=5-10bp;gc_cont=0.400	MKNSKSDRIKAAAHRALEEAHNRKKELEETKLDLELGGPKGLEPTRFGDWERKGIASDF	LASSO_PEPTIDE	/	metagenome
family28	TARA_SAMEA2620970_METAG_BDFNEAFP	TARA_SAMEA2620970_METAG-scaffold_674_23 # 23980 # 24159 # 1 # ID=16179_23;partial=00;start_type=ATG;rbs_motif=GGA/GAG/AGG;rbs_spacer=5-10bp;gc_cont=0.400	MKNSKSDRIKAAAHRALEEAHNRKKELEETKLDLELGGPKGLEPTRFGDWERKGIASDF	LASSO_PEPTIDE	/	metagenome
family28	TARA_SAMEA4398176_METAG_FHCHNHJL	TARA_SAMEA4398176_METAG-scaffold_409_30 # 33653 # 33832 # -1 # ID=16734_30;partial=00;start_type=ATG;rbs_motif=GGA/GAG/AGG;rbs_spacer=5-10bp;gc_cont=0.400	MKNSKSDRIKAAALRALEEARNRKKEIEEPKLDLELGGPKGLEPTRFGDWERKGIASDF	LASSO_PEPTIDE	/	metagenome
family28	TARA_SAMEA4396496_METAG_HGBPLAFP	TARA_SAMEA4396496_METAG-scaffold_393_23 # 23819 # 23998 # 1 # ID=16438_23;partial=00;start_type=ATG;rbs_motif=GGA/GAG/AGG;rbs_spacer=5-10bp;gc_cont=0.394	MKNSKSDRIKAAAHRALEEAHNRKKELEETKLDLELGGPKGLEPTRFGDWERKGIASDF	LASSO_PEPTIDE	/	metagenome
family28	TARA_SAMEA2620979_METAG_JAHMFKHJ	TARA_SAMEA2620979_METAG-scaffold_455_22 # 23769 # 23948 # 1 # ID=15411_22;partial=00;start_type=ATG;rbs_motif=GGA/GAG/AGG;rbs_spacer=5-10bp;gc_cont=0.400	MKNSKSDRIKAAAHRALEEAHNRKKELEETKLDLELGGPKGLEPTRFGDWERKGIASDF	LASSO_PEPTIDE	/	metagenome
family28	TARA_SAMEA4397649_METAG_NNLKDBAN	TARA_SAMEA4397649_METAG-scaffold_331_30 # 33643 # 33822 # -1 # ID=19675_30;partial=00;start_type=ATG;rbs_motif=GGA/GAG/AGG;rbs_spacer=5-10bp;gc_cont=0.400	MKNSKSDRIKAAALRALEEARNRKKEIEEPKLDLELGGPKGLEPTRFGDWERKGIASDF	LASSO_PEPTIDE	/	metagenome
family28	TARA_SAMEA4397157_METAG_ICMFHGLI	TARA_SAMEA4397157_METAG-scaffold_843_29 # 32999 # 33178 # -1 # ID=21168_29;partial=00;start_type=ATG;rbs_motif=GGA/GAG/AGG;rbs_spacer=5-10bp;gc_cont=0.406	MKNSKSDRIKAAAHRALEEAHNRKKELEETKLDLELGGPKGLEPTRFGDWERKGIASDF	LASSO_PEPTIDE	/	metagenome
family28	TARA_SAMEA4397295_METAG_KBDLACKE	TARA_SAMEA4397295_METAG-scaffold_3290_17 # 18721 # 18900 # 1 # ID=23738_17;partial=00;start_type=ATG;rbs_motif=GGA/GAG/AGG;rbs_spacer=5-10bp;gc_cont=0.550	MTDTKEKRLKDAAKRALTEAEARKLAALDETQPLELGGPKGLEPTRFGDWERKGITSDF	LASSO_PEPTIDE	ptm	metagenome
family28	TARA_SAMEA4398067_METAG_FFCGELPJ	TARA_SAMEA4398067_METAG-scaffold_403_23 # 25294 # 25473 # 1 # ID=18614_23;partial=00;start_type=ATG;rbs_motif=GGA/GAG/AGG;rbs_spacer=5-10bp;gc_cont=0.400	MKNSKSDRIKAAALRALEEARNRKKEIEEPKLDLELGGPKGLEPTRFGDWERKGIASDF	LASSO_PEPTIDE	/	metagenome
family28	TARA_SAMEA2621423_METAG_NKCAOMHN	TARA_SAMEA2621423_METAG-scaffold_1105_2 # 328 # 507 # 1 # ID=21937_2;partial=00;start_type=ATG;rbs_motif=GGA/GAG/AGG;rbs_spacer=5-10bp;gc_cont=0.394	MKNSKSDRIKAAAHRALEEAHNRKKELEETKLDLELGGPKGLEPTRFGDWERKGIASDF	LASSO_PEPTIDE	/	metagenome
family28	TARA_SAMEA4397239_METAG_LNCEEDGJ	TARA_SAMEA4397239_METAG-scaffold_309_30 # 33643 # 33822 # -1 # ID=20395_30;partial=00;start_type=ATG;rbs_motif=GGA/GAG/AGG;rbs_spacer=5-10bp;gc_cont=0.400	MKNSKSDRIKAAALRALEEARNRKKEIEEPKLDLELGGPKGLEPTRFGDWERKGIASDF	LASSO_PEPTIDE	/	metagenome
family28	TARA_SAMEA2621401_METAG_FMNFEBHP	TARA_SAMEA2621401_METAG-scaffold_330_29 # 33145 # 33324 # -1 # ID=20726_29;partial=00;start_type=ATG;rbs_motif=GGA/GAG/AGG;rbs_spacer=5-10bp;gc_cont=0.400	MKNSKSDRIKAAAHRALEEAHNRKKELEETKLDLELGGPKGLEPTRFGDWERKGIASDF	LASSO_PEPTIDE	/	metagenome
family28	TARA_SAMEA4397930_METAG_JDAPHHFF	TARA_SAMEA4397930_METAG-scaffold_386_24 # 26100 # 26279 # 1 # ID=18687_24;partial=00;start_type=ATG;rbs_motif=GGA/GAG/AGG;rbs_spacer=5-10bp;gc_cont=0.400	MKNSKSDRIKAAALRALEEARNRKKEIEEPKLDLELGGPKGLEPTRFGDWERKGIASDF	LASSO_PEPTIDE	/	metagenome
family28	TARA_082_SRF_0.22-3_k119_323723	TARA_082_SRF_0.22-3_k119_323723_3 # 1729 # 1908 # 1 # ID=761444_3;partial=00;start_type=ATG;rbs_motif=GGA/GAG/AGG;rbs_spacer=5-10bp;gc_cont=0.400	MKNSKSDRIKAAALRALEEARNRKKEIEEPKLDLELGGPKGLEPTRFGDWERKGIASDF	LASSO_PEPTIDE	/	metagenome
family28	TARA_092_SRF_0.22-3_k119_290843	TARA_092_SRF_0.22-3_k119_290843_9 # 7838 # 8017 # 1 # ID=1178461_9;partial=00;start_type=ATG;rbs_motif=GGA/GAG/AGG;rbs_spacer=5-10bp;gc_cont=0.400	MKNSKSDRIKAAAHRALEEAHNRKKELEETKLDLELGGPKGLEPTRFGDWERKGIASDF	LASSO_PEPTIDE	/	metagenome
family28	TARA_158_SRF_0.22-3_k119_153707	TARA_158_SRF_0.22-3_k119_153707_9 # 6871 # 7050 # -1 # ID=3265744_9;partial=00;start_type=ATG;rbs_motif=GGA/GAG/AGG;rbs_spacer=5-10bp;gc_cont=0.400	MKNSKSDRIKAAALRALEEARNRKKEIEEPKLDLELGGPKGLEPTRFGDWERKGIASDF	LASSO_PEPTIDE	/	metagenome
family29	3300000115.a___DelMOSum2011_c10003515	3300000115.a___DelMOSum2011_c10003515_3 # 1926 # 2018 # -1 # ID=544820_3;partial=00;start_type=ATG;rbs_motif=AATAA;rbs_spacer=15bp;gc_cont=0.312	MKTLKIDRPKCGCGNTSDSQGFCDGSHLNK	rSAM_MODIFIED_RiPP	/	metagenome
family29	3300000116.a___DelMOSpr2010_c10009819	3300000116.a___DelMOSpr2010_c10009819_7 # 4081 # 4173 # 1 # ID=704904_7;partial=00;start_type=ATG;rbs_motif=AATAA;rbs_spacer=15bp;gc_cont=0.323	MKTLKIDRPKCGCGNTSDSQGFCDGSHLNK	rSAM_MODIFIED_RiPP	/	metagenome
family29	3300024314.a___Ga0228657_1008728	3300024314.a___Ga0228657_1008728_2 # 641 # 724 # 1 # ID=8728_2;partial=00;start_type=ATG;rbs_motif=TAAAAA;rbs_spacer=6bp;gc_cont=0.440	MKNETPKCGCGNTQNAEGYCDGSHLNG	rSAM_MODIFIED_RiPP	/	metagenome
family29	3300028416.a___Ga0228614_1002490	3300028416.a___Ga0228614_1002490_3 # 873 # 965 # -1 # ID=2490_3;partial=00;start_type=ATG;rbs_motif=AATAA;rbs_spacer=15bp;gc_cont=0.312	MKTLKIDRPKCGCGNTSDSQGFCDGSHSNK	rSAM_MODIFIED_RiPP	/	metagenome
family29	TARA_B110000196_G_scaffold27901_1	TARA_B110000196_G_scaffold27901_1_2 # 1161 # 1250 # -1 # ID=10691_2;partial=00;start_type=ATG;rbs_motif=GGA/GAG/AGG;rbs_spacer=5-10bp;gc_cont=0.222	MKKNKRKKCSCGNTKNSEGYCDGSHNNKL	rSAM_MODIFIED_RiPP	/	metagenome
family30	3300021389.a___Ga0213868_10039427	3300021389.a___Ga0213868_10039427_5 # 2561 # 2653 # 1 # ID=39427_5;partial=00;start_type=ATG;rbs_motif=AATAA;rbs_spacer=15bp;gc_cont=0.323	MKTLKIDRPKCGCGNTSDSQGFCDGSHSNK	rSAM_MODIFIED_RiPP	/	metagenome
family30	3300025816.a___Ga0209193_1012580	3300025816.a___Ga0209193_1012580_3 # 929 # 1021 # 1 # ID=12580_3;partial=00;start_type=ATG;rbs_motif=AATAA;rbs_spacer=15bp;gc_cont=0.344	MKTLKIERPKCGCGNTSDSQGFCDGSHSNK	rSAM_MODIFIED_RiPP	/	metagenome
family31	3300025684.a___Ga0209652_1024974	3300025684.a___Ga0209652_1024974_3 # 2046 # 2129 # -1 # ID=24974_3;partial=00;start_type=ATG;rbs_motif=TATAA;rbs_spacer=11bp;gc_cont=0.321	MKADRPKCGCGNTSNAEGYCDGSHLNK	rSAM_MODIFIED_RiPP	/	metagenome
family32	3300000115.a___DelMOSum2011_c10009869	3300000115.a___DelMOSum2011_c10009869_2 # 405 # 521 # 1 # ID=545306_2;partial=00;start_type=ATG;rbs_motif=AGGA;rbs_spacer=5-10bp;gc_cont=0.419	MNVLKITAIIAVALTLTACAADQAANTAVSTDAASSKL	OTHER	/	metagenome
family32	3300000117.a___DelMOWin2010_c10005966	3300000117.a___DelMOWin2010_c10005966_6 # 4015 # 4131 # -1 # ID=547238_6;partial=00;start_type=ATG;rbs_motif=AGGA;rbs_spacer=5-10bp;gc_cont=0.419	MNVLKITAIIAVALTLTACAADQAANTAVSTDAASSKL	OTHER	/	metagenome
family32	3300000101.a___DelMOSum2010_c10029213	3300000101.a___DelMOSum2010_c10029213_3 # 1299 # 1415 # -1 # ID=443249_3;partial=00;start_type=ATG;rbs_motif=AGGA;rbs_spacer=5-10bp;gc_cont=0.402	MNVLKITAIIAVALTLTACAADQAANTAVTTDSASSKL	OTHER	/	metagenome
family32	3300000224.a___SI34jun09_10mDRAFT_1003722	3300000224.a___SI34jun09_10mDRAFT_1003722_3 # 1226 # 1342 # -1 # ID=172034_3;partial=00;start_type=ATG;rbs_motif=AGGA;rbs_spacer=5-10bp;gc_cont=0.402	MNVLKITAIIAVALTLTACAADQAANTAVTTDSASSKL	OTHER	/	metagenome
family32	3300000226.a___SI34jun09_135mDRAFT_1010977	3300000226.a___SI34jun09_135mDRAFT_1010977_4 # 2176 # 2292 # -1 # ID=251690_4;partial=00;start_type=ATG;rbs_motif=AGGA;rbs_spacer=5-10bp;gc_cont=0.402	MNVLKITAIIAVALTLTACAADQAANTAVTTDSASSKL	OTHER	/	metagenome
family32	3300000265.a___LP_A_09_P04_10DRAFT_1003868	3300000265.a___LP_A_09_P04_10DRAFT_1003868_2 # 1686 # 1802 # 1 # ID=188233_2;partial=00;start_type=ATG;rbs_motif=AGGA;rbs_spacer=5-10bp;gc_cont=0.402	MNVLKITAIIAVALTLTACAADQAANTAVTTDSASSKL	OTHER	/	metagenome
family32	3300020166.a___Ga0206128_1000205	3300020166.a___Ga0206128_1000205_63 # 65134 # 65250 # 1 # ID=205_63;partial=00;start_type=ATG;rbs_motif=AGGA;rbs_spacer=5-10bp;gc_cont=0.419	MNVLKITAIIAVALTLTACAADQAANTAVSTDAASSKL	OTHER	/	metagenome
family32	3300020165.a___Ga0206125_10000410	3300020165.a___Ga0206125_10000410_41 # 43858 # 43974 # 1 # ID=410_41;partial=00;start_type=ATG;rbs_motif=AGGA;rbs_spacer=5-10bp;gc_cont=0.419	MNVLKITAIIAVALTLTACAADQAANTAVSTDAASSKL	OTHER	/	metagenome
family32	3300020175.a___Ga0206124_10001398	3300020175.a___Ga0206124_10001398_9 # 7487 # 7603 # 1 # ID=1398_9;partial=00;start_type=ATG;rbs_motif=AGGA;rbs_spacer=5-10bp;gc_cont=0.419	MNVLKITAIIAVALTLTACAADQAANTAVSTDAASSKL	OTHER	/	metagenome
family32	3300020182.a___Ga0206129_10000050	3300020182.a___Ga0206129_10000050_171 # 177610 # 177726 # 1 # ID=50_171;partial=00;start_type=ATG;rbs_motif=AGGA;rbs_spacer=5-10bp;gc_cont=0.419	MNVLKITAIIAVALTLTACAADQAANTAVSTDAASSKL	OTHER	/	metagenome
family32	3300020595.a___Ga0206126_10000648	3300020595.a___Ga0206126_10000648_3 # 1710 # 1826 # -1 # ID=648_3;partial=00;start_type=ATG;rbs_motif=AGGA;rbs_spacer=5-10bp;gc_cont=0.419	MNVLKITAIIAVALTLTACAADQAANTAVSTDAASSKL	OTHER	/	metagenome
family32	3300021068.a___Ga0206684_1037529	3300021068.a___Ga0206684_1037529_2 # 907 # 1023 # -1 # ID=37529_2;partial=00;start_type=ATG;rbs_motif=AGGA;rbs_spacer=5-10bp;gc_cont=0.419	MNVLKITAIIAVALTLTACAADQAANTAVSTDAASSKL	OTHER	/	metagenome
family32	3300021085.a___Ga0206677_10001322	3300021085.a___Ga0206677_10001322_2 # 2112 # 2228 # 1 # ID=1322_2;partial=00;start_type=ATG;rbs_motif=AGGA;rbs_spacer=5-10bp;gc_cont=0.419	MNVLKITAIIAVALTLTACAADQAANTAVSTDAASSKL	OTHER	/	metagenome
family32	3300021084.a___Ga0206678_10019659	3300021084.a___Ga0206678_10019659_2 # 697 # 813 # 1 # ID=19659_2;partial=00;start_type=ATG;rbs_motif=AGGA;rbs_spacer=5-10bp;gc_cont=0.419	MNVLKITAIIAVALTLTACAADQAANTAVSTDAASSKL	OTHER	/	metagenome
family32	3300021365.a___Ga0206123_10000144	3300021365.a___Ga0206123_10000144_35 # 34936 # 35052 # 1 # ID=144_35;partial=00;start_type=ATG;rbs_motif=AGGA;rbs_spacer=5-10bp;gc_cont=0.419	MNVLKITAIIAVALTLTACAADQAANTAVSTDAASSKL	OTHER	/	metagenome
family32	3300021371.a___Ga0213863_10006410	3300021371.a___Ga0213863_10006410_6 # 4431 # 4547 # 1 # ID=6410_6;partial=00;start_type=ATG;rbs_motif=AGGA;rbs_spacer=5-10bp;gc_cont=0.419	MNVLKITAIIAVALTLTACAADQAANTAVSTDAASSKL	OTHER	/	metagenome
family32	3300021373.a___Ga0213865_10006481	3300021373.a___Ga0213865_10006481_4 # 2305 # 2421 # -1 # ID=6481_4;partial=00;start_type=ATG;rbs_motif=AGGA;rbs_spacer=5-10bp;gc_cont=0.419	MNVLKITAIIAVALTLTACAADQAANTAVSTDAASSKL	OTHER	/	metagenome
family32	3300021375.a___Ga0213869_10012710	3300021375.a___Ga0213869_10012710_6 # 3411 # 3527 # 1 # ID=12710_6;partial=00;start_type=ATG;rbs_motif=AGGA;rbs_spacer=5-10bp;gc_cont=0.419	MNVLKITAIIAVALTLTACAADQAANTAVSTDAASSKL	OTHER	/	metagenome
family32	3300021378.a___Ga0213861_10012417	3300021378.a___Ga0213861_10012417_2 # 1591 # 1707 # 1 # ID=12417_2;partial=00;start_type=ATG;rbs_motif=AGGA;rbs_spacer=5-10bp;gc_cont=0.402	MNVLKITAIIAVALTLTACAADQAANTAVTTDSASSKL	OTHER	/	metagenome
family32	3300021378.a___Ga0213861_10018276	3300021378.a___Ga0213861_10018276_3 # 1571 # 1687 # -1 # ID=18276_3;partial=00;start_type=ATG;rbs_motif=AGGA;rbs_spacer=5-10bp;gc_cont=0.419	MNVLKITAIIAVALTLTACAADQAANTAVSTDAASSKL	OTHER	/	metagenome
family32	3300023109.a___Ga0233432_10000294	3300023109.a___Ga0233432_10000294_20 # 19525 # 19641 # -1 # ID=294_20;partial=00;start_type=ATG;rbs_motif=AGGA;rbs_spacer=5-10bp;gc_cont=0.402	MNVLKITAIIAVALTLTACAADQAANTAVTTDSASSKL	OTHER	/	metagenome
family32	3300024226.a___Ga0228667_1000155	3300024226.a___Ga0228667_1000155_22 # 20484 # 20600 # -1 # ID=155_22;partial=00;start_type=ATG;rbs_motif=AGGA;rbs_spacer=5-10bp;gc_cont=0.419	MNVLKITAIIAVALTLTACAADQAANTAVSTDAASSKL	OTHER	/	metagenome
family32	3300024229.a___Ga0233402_1000220	3300024229.a___Ga0233402_1000220_7 # 5314 # 5430 # 1 # ID=220_7;partial=00;start_type=ATG;rbs_motif=AGGA;rbs_spacer=5-10bp;gc_cont=0.402	MNVLKITAIIAVALTLTACAADQAANTAVTTDSASSKL	OTHER	/	metagenome
family32	3300024255.a___Ga0233438_10000705	3300024255.a___Ga0233438_10000705_20 # 21147 # 21263 # 1 # ID=705_20;partial=00;start_type=ATG;rbs_motif=AGGA;rbs_spacer=5-10bp;gc_cont=0.402	MNVLKITAIIAVALTLTACAADQAANTAVTTDSASSKL	OTHER	/	metagenome
family32	3300024264.a___Ga0233444_10000724	3300024264.a___Ga0233444_10000724_20 # 19400 # 19516 # -1 # ID=724_20;partial=00;start_type=ATG;rbs_motif=AGGA;rbs_spacer=5-10bp;gc_cont=0.402	MNVLKITAIIAVALTLTACAADQAANTAVTTDSASSKL	OTHER	/	metagenome
family32	3300024313.a___Ga0228624_1000012	3300024313.a___Ga0228624_1000012_21 # 20652 # 20768 # -1 # ID=12_21;partial=00;start_type=ATG;rbs_motif=AGGA;rbs_spacer=5-10bp;gc_cont=0.402	MNVLKITAIIAVALTLTACAADQAANTAVTTDSASSKL	OTHER	/	metagenome
family32	3300024313.a___Ga0228624_1000648	3300024313.a___Ga0228624_1000648_13 # 13159 # 13275 # 1 # ID=648_13;partial=00;start_type=ATG;rbs_motif=AGGA;rbs_spacer=5-10bp;gc_cont=0.419	MNVLKITAIIAVALTLTACAADQAANTAVSTDAASSKL	OTHER	/	metagenome
family32	3300024320.a___Ga0233398_1000244	3300024320.a___Ga0233398_1000244_13 # 13320 # 13436 # 1 # ID=244_13;partial=00;start_type=ATG;rbs_motif=AGGA;rbs_spacer=5-10bp;gc_cont=0.419	MNVLKITAIIAVALTLTACAADQAANTAVSTDAASSKL	OTHER	/	metagenome
family32	3300024321.a___Ga0228626_1000124	3300024321.a___Ga0228626_1000124_23 # 21950 # 22066 # -1 # ID=124_23;partial=00;start_type=ATG;rbs_motif=AGGA;rbs_spacer=5-10bp;gc_cont=0.419	MNVLKITAIIAVALTLTACAADQAANTAVSTDAASSKL	OTHER	/	metagenome
family32	3300025626.a___Ga0209716_1012543	3300025626.a___Ga0209716_1012543_4 # 2866 # 2982 # 1 # ID=12543_4;partial=00;start_type=ATG;rbs_motif=AGGA;rbs_spacer=5-10bp;gc_cont=0.419	MNVLKITAIIAVALTLTACAADQAANTAVSTDAASSKL	OTHER	/	metagenome
family32	3300025640.a___Ga0209198_1000371	3300025640.a___Ga0209198_1000371_28 # 28258 # 28374 # 1 # ID=371_28;partial=00;start_type=ATG;rbs_motif=AGGA;rbs_spacer=5-10bp;gc_cont=0.419	MNVLKITAIIAVALTLTACAADQAANTAVSTDAASSKL	OTHER	/	metagenome
family32	3300025658.a___Ga0209659_1000282	3300025658.a___Ga0209659_1000282_19 # 19405 # 19521 # 1 # ID=282_19;partial=00;start_type=ATG;rbs_motif=AGGA;rbs_spacer=5-10bp;gc_cont=0.402	MNVLKITAIIAVALTLTACAADQAANTAVTTDSASSKL	OTHER	/	metagenome
family32	3300025659.a___Ga0209249_1027577	3300025659.a___Ga0209249_1027577_3 # 1420 # 1536 # -1 # ID=27577_3;partial=00;start_type=ATG;rbs_motif=AGGA;rbs_spacer=5-10bp;gc_cont=0.402	MNVLKITAIIAVALTLTACAADQAANTAVTTDSASSKL	OTHER	/	metagenome
family32	3300025696.a___Ga0209532_1000110	3300025696.a___Ga0209532_1000110_66 # 67239 # 67355 # 1 # ID=110_66;partial=00;start_type=ATG;rbs_motif=AGGA;rbs_spacer=5-10bp;gc_cont=0.419	MNVLKITAIIAVALTLTACAADQAANTAVSTDAASSKL	OTHER	/	metagenome
family32	3300025696.a___Ga0209532_1000992	3300025696.a___Ga0209532_1000992_9 # 8514 # 8630 # 1 # ID=992_9;partial=00;start_type=ATG;rbs_motif=AGGA;rbs_spacer=5-10bp;gc_cont=0.402	MNVLKITAIIAVALTLTACAADQAANTAVTTDSASSKL	OTHER	/	metagenome
family32	3300025699_45	3300025699.a___Ga0209715_1000286_37 # 36395 # 36511 # 1 # ID=286_37;partial=00;start_type=ATG;rbs_motif=AGGA;rbs_spacer=5-10bp;gc_cont=0.419	MNVLKITAIIAVALTLTACAADQAANTAVSTDAASSKL	OTHER	/	metagenome
family32	3300025832_38	3300025832.a___Ga0209307_1000406_10 # 10282 # 10398 # 1 # ID=406_10;partial=00;start_type=ATG;rbs_motif=AGGA;rbs_spacer=5-10bp;gc_cont=0.402	MNVLKITAIIAVALTLTACAADQAANTAVTTDSASSKL	OTHER	/	metagenome
family32	3300025860.a___Ga0209119_1000461	3300025860.a___Ga0209119_1000461_18 # 17166 # 17282 # 1 # ID=461_18;partial=00;start_type=ATG;rbs_motif=AGGA;rbs_spacer=5-10bp;gc_cont=0.402	MNVLKITAIIAVALTLTACAADQAANTAVTTDSASSKL	OTHER	/	metagenome
family32	3300025869.a___Ga0209308_10000308	3300025869.a___Ga0209308_10000308_39 # 37918 # 38034 # 1 # ID=308_39;partial=00;start_type=ATG;rbs_motif=AGGA;rbs_spacer=5-10bp;gc_cont=0.419	MNVLKITAIIAVALTLTACAADQAANTAVSTDAASSKL	OTHER	/	metagenome
family32	3300025874.a___Ga0209533_1001156	3300025874.a___Ga0209533_1001156_2 # 1614 # 1730 # 1 # ID=1156_2;partial=00;start_type=ATG;rbs_motif=AGGA;rbs_spacer=5-10bp;gc_cont=0.402	MNVLKITAIIAVALTLTACAADQAANTAVTTDSASSKL	OTHER	/	metagenome
family32	3300025874.a___Ga0209533_1014609	3300025874.a___Ga0209533_1014609_6 # 3936 # 4052 # 1 # ID=14609_6;partial=00;start_type=ATG;rbs_motif=AGGA;rbs_spacer=5-10bp;gc_cont=0.419	MNVLKITAIIAVALTLTACAADQAANTAVSTDAASSKL	OTHER	/	metagenome
family32	3300025876.a___Ga0209223_10077804	3300025876.a___Ga0209223_10077804_2 # 1037 # 1153 # -1 # ID=77804_2;partial=00;start_type=ATG;rbs_motif=AGGA;rbs_spacer=5-10bp;gc_cont=0.419	MNVLKITAIIAVALTLTACAADQAANTAVSTDAASSKL	OTHER	/	metagenome
family32	3300025892.a___Ga0209630_10000039	3300025892.a___Ga0209630_10000039_143 # 144644 # 144760 # 1 # ID=39_143;partial=00;start_type=ATG;rbs_motif=AGGA;rbs_spacer=5-10bp;gc_cont=0.402	MNVLKITAIIAVALTLTACAADQAANTAVTTDSASSKL	OTHER	/	metagenome
family32	3300025892.a___Ga0209630_10066897	3300025892.a___Ga0209630_10066897_2 # 397 # 513 # 1 # ID=66897_2;partial=00;start_type=ATG;rbs_motif=AGGA;rbs_spacer=5-10bp;gc_cont=0.419	MNVLKITAIIAVALTLTACAADQAANTAVSTDAASSKL	OTHER	/	metagenome
family32	3300025894.a___Ga0209335_10000122	3300025894.a___Ga0209335_10000122_63 # 63957 # 64073 # 1 # ID=122_63;partial=00;start_type=ATG;rbs_motif=AGGA;rbs_spacer=5-10bp;gc_cont=0.419	MNVLKITAIIAVALTLTACAADQAANTAVSTDAASSKL	OTHER	/	metagenome
family32	3300025897.a___Ga0209425_10007461	3300025897.a___Ga0209425_10007461_6 # 5428 # 5544 # -1 # ID=7461_6;partial=00;start_type=ATG;rbs_motif=AGGA;rbs_spacer=5-10bp;gc_cont=0.402	MNVLKITAIIAVALTLTACAADQAANTAVTTDSASSKL	OTHER	/	metagenome
family32	3300027077.a___Ga0208941_1000001	3300027077.a___Ga0208941_1000001_23 # 23738 # 23854 # -1 # ID=1_23;partial=00;start_type=ATG;rbs_motif=AGGA;rbs_spacer=5-10bp;gc_cont=0.402	MNVLKITAIIAVALTLTACAADQAANTAVTTDSASSKL	OTHER	/	metagenome
family32	3300027081.a___Ga0208954_1000001	3300027081.a___Ga0208954_1000001_187 # 192336 # 192452 # 1 # ID=1_187;partial=00;start_type=ATG;rbs_motif=AGGA;rbs_spacer=5-10bp;gc_cont=0.402	MNVLKITAIIAVALTLTACAADQAANTAVTTDSASSKL	OTHER	/	metagenome
family32	3300027198.a___Ga0208163_1001829	3300027198.a___Ga0208163_1001829_6 # 3835 # 3951 # 1 # ID=1829_6;partial=00;start_type=ATG;rbs_motif=AGGA;rbs_spacer=5-10bp;gc_cont=0.402	MNVLKITAIIAVALTLTACAADQAANTAVTTDSASSKL	OTHER	/	metagenome
family32	3300027248_5	3300027248.a___Ga0208176_1001092_6 # 4348 # 4464 # 1 # ID=1092_6;partial=00;start_type=ATG;rbs_motif=AGGA;rbs_spacer=5-10bp;gc_cont=0.402	MNVLKITAIIAVALTLTACAADQAANTAVTTDSASSKL	OTHER	/	metagenome
family32	3300027506_10	3300027506.a___Ga0208973_1000002_19 # 18558 # 18674 # -1 # ID=2_19;partial=00;start_type=ATG;rbs_motif=AGGA;rbs_spacer=5-10bp;gc_cont=0.402	MNVLKITAIIAVALTLTACAADQAANTAVTTDSASSKL	OTHER	/	metagenome
family32	3300028128.a___Ga0228645_1003445	3300028128.a___Ga0228645_1003445_2 # 1847 # 1963 # 1 # ID=3445_2;partial=00;start_type=ATG;rbs_motif=AGGA;rbs_spacer=5-10bp;gc_cont=0.402	MNVLKITAIIAVALTLTACAADQAANTAVTTDSASSKL	OTHER	/	metagenome
family32	3300028129.a___Ga0228634_1002568	3300028129.a___Ga0228634_1002568_6 # 4241 # 4357 # 1 # ID=2568_6;partial=00;start_type=ATG;rbs_motif=AGGA;rbs_spacer=5-10bp;gc_cont=0.427	MNVLKITAIIAVALTLTACAADQAANTAVSTDAASSKL	OTHER	/	metagenome
family32	3300028135.a___Ga0228606_1000008	3300028135.a___Ga0228606_1000008_38 # 43021 # 43137 # -1 # ID=8_38;partial=00;start_type=ATG;rbs_motif=AGGA;rbs_spacer=5-10bp;gc_cont=0.402	MNVLKITAIIAVALTLTACAADQAANTAVTTDSASSKL	OTHER	/	metagenome
family32	3300028189.a___Ga0257127_1003977	3300028189.a___Ga0257127_1003977_7 # 6043 # 6159 # -1 # ID=3977_7;partial=00;start_type=ATG;rbs_motif=AGGA;rbs_spacer=5-10bp;gc_cont=0.402	MNVLKITAIIAVALTLTACAADQAANTAVTTDSASSKL	OTHER	/	metagenome
family32	3300028396.a___Ga0228643_1000358	3300028396.a___Ga0228643_1000358_15 # 11847 # 11963 # -1 # ID=358_15;partial=00;start_type=ATG;rbs_motif=AGGA;rbs_spacer=5-10bp;gc_cont=0.419	MNVLKITAIIAVALTLTACAADQAANTAVSTDAASSKL	OTHER	/	metagenome
family32	3300028397.a___Ga0228639_1000252	3300028397.a___Ga0228639_1000252_23 # 22146 # 22262 # -1 # ID=252_23;partial=00;start_type=ATG;rbs_motif=AGGA;rbs_spacer=5-10bp;gc_cont=0.419	MNVLKITAIIAVALTLTACAADQAANTAVSTDAASSKL	OTHER	/	metagenome
family32	3300028414.a___Ga0228627_1003254	3300028414.a___Ga0228627_1003254_4 # 2670 # 2786 # 1 # ID=3254_4;partial=00;start_type=ATG;rbs_motif=AGGA;rbs_spacer=5-10bp;gc_cont=0.427	MNVLKITAIIAVALTLTACAADQAANTAVSTDAASSKL	OTHER	/	metagenome
family32	TOA-bin-2282	TOA-bin-2282_c000022_5 # 3573 # 3689 # -1 # ID=64920_5;partial=00;start_type=ATG;rbs_motif=AGGA;rbs_spacer=5-10bp;gc_cont=0.419	MNVLKITAIIAVALTLTACAADQAANTAVSTDAASSKL	OTHER	/	metagenome
family32	BGEO_SAMN07136910_METAG_MFBMCAID	BGEO_SAMN07136910_METAG-scaffold_302_3 # 1592 # 1708 # -1 # ID=25998_3;partial=00;start_type=ATG;rbs_motif=AGGA;rbs_spacer=5-10bp;gc_cont=0.419	MNVLKITAIIAVALTLTACAADQAANTAVSTDAASSKL	OTHER	/	metagenome
family32	BGEO_SAMN07136914_BIN_00000028	BGEO_SAMN07136914_METAG-scaffold_1509_6 # 4124 # 4240 # 1 # ID=71525_6;partial=00;start_type=ATG;rbs_motif=AGGA;rbs_spacer=5-10bp;gc_cont=0.419	MNVLKITAIIAVALTLTACAADQAANTAVSTDAASSKL	OTHER	/	metagenome
family32	BGEO_SAMN07136953_METAG_PODLFDNO	BGEO_SAMN07136953_METAG-scaffold_9350_2 # 1007 # 1123 # 1 # ID=335791_2;partial=00;start_type=ATG;rbs_motif=AGGA;rbs_spacer=5-10bp;gc_cont=0.419	MNVLKITAIIAVALTLTACAADQAANTAVSTDAASSKL	OTHER	/	metagenome
family32	TARA_SAMEA4396496_METAG_HDILNDHF	TARA_SAMEA4396496_METAG-scaffold_1385_14 # 14055 # 14171 # 1 # ID=21274_14;partial=00;start_type=ATG;rbs_motif=AGGA;rbs_spacer=5-10bp;gc_cont=0.419	MNVLKITAIIAVALTLTACAADQAANTAVSTDAASSKL	OTHER	/	metagenome
family32	TARA_SAMEA2591074_METAG_MMNGHOGL	TARA_SAMEA2591074_METAG-scaffold_162_23 # 21445 # 21561 # -1 # ID=12568_23;partial=00;start_type=ATG;rbs_motif=AGGA;rbs_spacer=5-10bp;gc_cont=0.419	MNVLKITAIIAVALTLTACAADQAANTAVSTDAASSKL	OTHER	/	metagenome
family32	TARA_SAMEA2621401_METAG_FMNFEBHP	TARA_SAMEA2621401_METAG-scaffold_6816_9 # 6044 # 6160 # 1 # ID=69661_9;partial=00;start_type=ATG;rbs_motif=AGGA;rbs_spacer=5-10bp;gc_cont=0.402	MNVLKITAIIAVALTLTACAADQAANTAVTTDSASSKL	OTHER	/	metagenome
family32	BGEO_SAMN07136909_METAG_CJGHLIGC	BGEO_SAMN07136909_METAG-scaffold_2203_6 # 4480 # 4596 # 1 # ID=84749_6;partial=00;start_type=ATG;rbs_motif=AGGA;rbs_spacer=5-10bp;gc_cont=0.419	MNVLKITAIIAVALTLTACAADQAANTAVSTDAASSKL	OTHER	/	metagenome
family32	TARA_092_SRF_0.22-3_k119_10434	TARA_092_SRF_0.22-3_k119_10434_2 # 935 # 1051 # -1 # ID=1150631_2;partial=00;start_type=ATG;rbs_motif=AGGA;rbs_spacer=5-10bp;gc_cont=0.410	MNVLKITAIIAVALTLTACAADQAANTAVTTDSASSKL	OTHER	/	metagenome
family32	TARA_158_SRF_0.22-3_k119_416329	TARA_158_SRF_0.22-3_k119_416329_5 # 3169 # 3285 # 1 # ID=3289084_5;partial=00;start_type=ATG;rbs_motif=AGGA;rbs_spacer=5-10bp;gc_cont=0.402	MNVLKITAIIAVALTLTACAADQAANTAVTTDSASSKL	OTHER	/	metagenome
family32	TARA_135_DCM_0.22-3_k119_522690	TARA_135_DCM_0.22-3_k119_522690_5 # 3078 # 3194 # 1 # ID=2223752_5;partial=00;start_type=ATG;rbs_motif=GGA/GAG/AGG;rbs_spacer=5-10bp	MNVLKITAIIAVALTLTACAADQAANTAVSTDAASSKL	OTHER	/	metagenome
family33	3300000115.a___DelMOSum2011_c10004090	3300000115.a___DelMOSum2011_c10004090_2 # 1205 # 1330 # 1 # ID=599310_2;partial=00;start_type=ATG;rbs_motif=TAA;rbs_spacer=11bp;gc_cont=0.286	MKKIIPIFFFTSLFINCSSGDDSGSNNPDTNNNNTGQSIAS	rSAM_MODIFIED_RiPP	/	metagenome
family34	3300000179.a___LPjun09P16500mDRAFT_c1004152	3300000179.a___LPjun09P16500mDRAFT_c1004152_2 # 843 # 1061 # -1 # ID=1246_2;partial=00;start_type=ATG;rbs_motif=TAA;rbs_spacer=12bp;gc_cont=0.406	MNNQTIKNNDYKVADMTLASFGRKEIELAEAEMPALMTLPGKIQGFTTLGRCKHSWLYSHDYSNCSPNGNPC	LANTHIPEPTIDE	/	metagenome
family35	3300000181.a___LPjun08P4500mDRAFT_c1002112	3300000181.a___LPjun08P4500mDRAFT_c1002112_5 # 2432 # 2638 # 1 # ID=634_5;partial=00;start_type=ATG;rbs_motif=AGGA;rbs_spacer=5-10bp;gc_cont=0.357	MMTYLTEQDFAPVLIDDETYQPSGAVKSSAFVGNAYNEVKVDGKFCPECGTSLSMTAKFCPECGTTQE	LANTHIPEPTIDE	/	metagenome
family36	3300020440.a___Ga0211518_10000045	3300020440.a___Ga0211518_10000045_25 # 25301 # 25372 # -1 # ID=45_25;partial=00;start_type=ATG;rbs_motif=AGGAG;rbs_spacer=5-10bp;gc_cont=0.417	MWTKPTATDLRFGFEITMYVAAK	rSAM_MODIFIED_RiPP	ptm	metagenome
family40	3300000117.a___DelMOWin2010_c10023021	3300000117.a___DelMOWin2010_c10023021_2 # 166 # 309 # -1 # ID=329727_2;partial=00;start_type=ATG;rbs_motif=GGA/GAG/AGG;rbs_spacer=5-10bp;gc_cont=0.354	MSVKREDVLKYLEEANMIEISELVKDIEDKFGVTAAVPVAAAAVRSC	OTHER	/	metagenome
family40	3300001966.a___GOS2245_1073447	3300001966.a___GOS2245_1073447_2 # 687 # 830 # -1 # ID=73399_2;partial=00;start_type=ATG;rbs_motif=GGA/GAG/AGG;rbs_spacer=5-10bp;gc_cont=0.368	MSVKREDVLKYLEEANMIEISELVKDIEDKFGVTAAVPVAAAAVRSC	OTHER	/	metagenome
family41	BGEO_SAMN07136961_BIN_00000141	BGEO_SAMN07136961_METAG-scaffold_16964_4 # 703 # 870 # 1 # ID=93328_4;partial=00;start_type=ATG;rbs_motif=AGGAG;rbs_spacer=5-10bp;gc_cont=0.429	MNTLTMIKKQIKKAAAVHNAQINHTAYRGVEYDTRCVESKESHGTFCYRGHTYSK	rSAM_MODIFIED_RiPP	/	metagenome
family42	3300000117.a___DelMOWin2010_c10039491	3300000117.a___DelMOWin2010_c10039491_5 # 1634 # 1795 # -1 # ID=659002_5;partial=00;start_type=ATG;rbs_motif=GGAG/GAGG;rbs_spacer=5-10bp;gc_cont=0.389	MKKNDKDINSTNSGIWIGVGTAIGVAVFVITRDPVWIGVGVAIGAALDWTYRK	OTHER	/	metagenome
family42	3300025803.a___Ga0208425_1012283	3300025803.a___Ga0208425_1012283_5 # 1629 # 1790 # 1 # ID=12283_5;partial=00;start_type=ATG;rbs_motif=GGAG/GAGG;rbs_spacer=5-10bp;gc_cont=0.389	MKKNDKDINSTNSGIWIGVGAAIGVAVFVITRDPVWIGVGVAIGAALDWTYRK	OTHER	/	metagenome
family43	3300000172.a___SI34jun09_200mDRAFT_c1000052	3300000172.a___SI34jun09_200mDRAFT_c1000052_37 # 30132 # 30227 # -1 # ID=135383_37;partial=00;start_type=ATG;rbs_motif=GGAG/GAGG;rbs_spacer=5-10bp;gc_cont=0.229	MKQIRQIKINEKNGYIKTEKNTKGGCPSCHI	rSAM_MODIFIED_RiPP	ptm	metagenome
family95	GCA_002424045.1	DIPH01000028.1_30 # 29787 # 29936 # -1 # ID=114306_30;partial=00;start_type=ATG;rbs_motif=GGAGG;rbs_spacer=5-10bp;gc_cont=0.460	MQMKKKHIRTLSGTALKETLKTGGCGECQTSCQSACKTSCTVGNQACEK	rSAM_MODIFIED_RiPP	ptm	metagenome
family244	GCA_002420545.1	DIII01000013.1_49 # 57612 # 57800 # -1 # ID=126587_49;partial=00;start_type=ATG;rbs_motif=TAAAAA;rbs_spacer=9bp;gc_cont=0.402	MKNLKKVSRGELRTIKGGYRSCIDGCNIEMGEMCCSGVCRIGVVVPTTDPDFPEFTVCPKKP	rSAM_MODIFIED_RiPP	/	metagenome
family244	GCA_002439165.1	DJTE01000011.1_54 # 58883 # 59068 # -1 # ID=3461_54;partial=00;start_type=ATG;rbs_motif=AAAA;rbs_spacer=15bp;gc_cont=0.409	MKNLKKVTRGELRTIKGGYRNCMDGCNLDMGEMCCSGVCRVGVPSNNPDFPGLLVCPKKGS	rSAM_MODIFIED_RiPP	/	metagenome
family255	GCA_002320205.1	DCKC01000018.1_38 # 39991 # 40284 # 1 # ID=41481_38;partial=00;start_type=ATG;rbs_motif=TAAA;rbs_spacer=11bp;gc_cont=0.415	MKLRKLKLNEASKAELNEREMCRVLGGGTPGCCQCGCNYEGKPGGSSTSANDSANNAHGYTSDGSHPCCSTTDPKPEFPEITPPPFWNPQDALCGHF	rSAM_MODIFIED_RiPP	ptm	metagenome
family255	GCA_002320205.1	DCKC01000018.1_40 # 41730 # 42041 # 1 # ID=41481_40;partial=00;start_type=ATG;rbs_motif=TAAA;rbs_spacer=11bp;gc_cont=0.423	MKLRKLKLNEASKAELNEREMCRVLGGGTIGCCQCGCNYEGKPGGSSTSANDSANNAHGYTSDGSHPCCSTTDPKPEFPKFPDFPVMPQDALCGATQGHSCGI	rSAM_MODIFIED_RiPP	ptm	metagenome
family283	TARA_B100000767_G_scaffold261634_1	TARA_B100000767_G_scaffold261634_1_2 # 292 # 480 # 1 # ID=141570_2;partial=00;start_type=ATG;rbs_motif=TAA;rbs_spacer=11bp;gc_cont=0.397	MKKQILNLGKALNKAEQKTVNGGRRPGSGPCGGTGGMPVSPAYCAVGTWGTQWYNDVCYACY	rSAM_MODIFIED_RiPP	ptm	metagenome
family308	GCA_002314375.1	DCFF01000007.1_374 # 426382 # 426564 # 1 # ID=50259_374;partial=00;start_type=ATG;rbs_motif=TAA;rbs_spacer=11bp;gc_cont=0.377	MNSIKNAKKLRKADLKNISGGVSGNPDLSLCGCSCSGSVTGPWYCVQYIGCPQVYTCGEI	rSAM_MODIFIED_RiPP	/	metagenome
family308	GCA_002294525.1	DBES01000010.1_477 # 525753 # 525932 # -1 # ID=59056_477;partial=00;start_type=ATG;rbs_motif=TAAA;rbs_spacer=13bp;gc_cont=0.394	MKNAKKLRKQDLKNITGGISGNPDLSLCGCSCSGSVTGPWYCVQYIACPQVYTCGEAAI	rSAM_MODIFIED_RiPP	/	metagenome
family308	GCA_002340165.1	DDKZ01000017.1_347 # 391038 # 391220 # 1 # ID=48437_347;partial=00;start_type=ATG;rbs_motif=TAA;rbs_spacer=11bp;gc_cont=0.377	MNSIKNAKKLRKADLKNISGGVSGNPDLSLCGCSCSGSVTGPWYCVQYIGCPQVYTCGEI	rSAM_MODIFIED_RiPP	/	metagenome
family308	GCA_002421065.1	DIJE01000002.1_236 # 252820 # 253002 # -1 # ID=111119_236;partial=00;start_type=ATG;rbs_motif=TAA;rbs_spacer=11bp;gc_cont=0.383	MNSIKNAKKLRKADLKNISGGVSGNPDLSLCGCSCSGSVTGPWYCVQYIGCPQVYTCGEI	rSAM_MODIFIED_RiPP	/	metagenome
family308	GCA_002472905.1	DKSW01000002.1_65 # 70335 # 70517 # -1 # ID=98090_65;partial=00;start_type=ATG;rbs_motif=TAA;rbs_spacer=11bp;gc_cont=0.383	MNSIKNAKKLRKADLKNISGGVSGNPDLSLCGCSCSGSVTGPWYCVQYIGCPQVYTCGEI	rSAM_MODIFIED_RiPP	/	metagenome
family308	GCA_002476825.1	DLML01000026.1_17 # 14161 # 14343 # -1 # ID=119377_17;partial=00;start_type=ATG;rbs_motif=TAA;rbs_spacer=11bp;gc_cont=0.388	MNSIKNAKKLRKADLKNISGGVSGNPDLSLCGCSCSGSVTGPWYCVQYIGCPQVYTCGEI	rSAM_MODIFIED_RiPP	/	metagenome
family308	GCA_002315415.1	DCFI01000032.1_96 # 102000 # 102179 # 1 # ID=22096_96;partial=00;start_type=ATG;rbs_motif=TAAAAA;rbs_spacer=10bp;gc_cont=0.394	MSQKILKNAKKLERDNLKEIVGGISGTPDLSLCGCSCTGAVTGPSYCTKYKSCLQVMTC	LANTHIPEPTIDE	/	metagenome
family308	GCA_002430025.1	DJBJ01000008.1_77 # 83567 # 83746 # 1 # ID=109671_77;partial=00;start_type=ATG;rbs_motif=TAAAAA;rbs_spacer=10bp;gc_cont=0.406	MSQKILKNAKKLERDSLKEIVGGISGTPDLSLCGCSCTGAVTGPSYCTKYKSCLQVMTC	LANTHIPEPTIDE	/	metagenome
family308	GCA_002314375.1	DCFF01000007.1_373 # 425903 # 426088 # 1 # ID=50259_373;partial=00;start_type=ATG;rbs_motif=TAAA;rbs_spacer=11bp;gc_cont=0.409	MSQKIFKNAKKLKKDDLKNIVGGVAGIATPDLSQCGCSCTGAVTGPAYCVKYKNCLQVITC	LANTHIPEPTIDE	/	metagenome
family308	GCA_002338325.1	DDIB01000004.1_295 # 317532 # 317711 # 1 # ID=29796_295;partial=00;start_type=ATG;rbs_motif=TAAA;rbs_spacer=12bp;gc_cont=0.394	MKNAKKLRKEDLKTIVGGIGGSGSIGIPNSSLCGCSCTGAVTGPDYCVNLISCPQVMTC	LANTHIPEPTIDE	/	metagenome
family308	GCA_002340165.1	DDKZ01000017.1_346 # 390559 # 390744 # 1 # ID=48437_346;partial=00;start_type=ATG;rbs_motif=TAAA;rbs_spacer=11bp;gc_cont=0.409	MSQKIFKNAKKLKKDDLKNIVGGVAGIATPDLSQCGCSCTGAVTGPAYCVKYKNCLQVITC	LANTHIPEPTIDE	/	metagenome
family308	GCA_002392055.1	DGGF01000009.1_374 # 422707 # 422886 # -1 # ID=61390_374;partial=00;start_type=ATG;rbs_motif=TAAA;rbs_spacer=12bp;gc_cont=0.389	MKNAKKLRKEDLKTIVGGIGGSGSIGIPNSSLCGCSCTGAVTGPDYCVNLISCPQVMTC	LANTHIPEPTIDE	/	metagenome
family308	GCA_002421065.1	DIJE01000002.1_237 # 253296 # 253481 # -1 # ID=111119_237;partial=00;start_type=ATG;rbs_motif=TAAA;rbs_spacer=11bp;gc_cont=0.403	MSQKIFKNAKKLKKDDLKNIVGGVAGIATPDLSQCGCSCTGAVTGPAYCVKYKNCLQVITC	LANTHIPEPTIDE	/	metagenome
family308	GCA_002420545.1	DIII01000015.1_116 # 124091 # 124264 # -1 # ID=24560_116;partial=00;start_type=ATG;rbs_motif=TAAA;rbs_spacer=13bp;gc_cont=0.448	MKNAKKLRKQDLKNITGGVSGKPDLSLCGCSCSGAVTGPDYCSIYIGCPQVYTCGEI	rSAM_MODIFIED_RiPP	/	metagenome
family308	GCA_002472905.1	DKSW01000002.1_66 # 70811 # 70996 # -1 # ID=98090_66;partial=00;start_type=ATG;rbs_motif=TAAA;rbs_spacer=11bp;gc_cont=0.403	MSQKIFKNAKKLKKDDLKNIVGGVAGIATPDLSQCGCSCTGAVTGPAYCVKYKNCLQVITC	LANTHIPEPTIDE	/	metagenome
family308	GCA_002476825.1	DLML01000026.1_18 # 14637 # 14822 # -1 # ID=119377_18;partial=00;start_type=ATG;rbs_motif=TAAA;rbs_spacer=11bp;gc_cont=0.403	MSQKIFKNAKKLKKDDLKNIVGGVAGIATPDLSQCGCSCTGAVTGPAYCVKYKNCLQVITC	LANTHIPEPTIDE	/	metagenome
family311	GCA_002338325.1	DDIB01000006.1_56 # 48376 # 48531 # -1 # ID=79849_56;partial=00;start_type=ATG;rbs_motif=AAAA;rbs_spacer=4bp;gc_cont=0.353	MKNSNIQKRRLTKKELKEINGGNGPVCVTTCFCNIDGEISIRPCSAKGVCC	rSAM_MODIFIED_RiPP	/	metagenome
family311	GCA_002392055.1	DGGF01000002.1_418 # 432932 # 433087 # -1 # ID=28626_418;partial=00;start_type=ATG;rbs_motif=AAAA;rbs_spacer=4bp;gc_cont=0.353	MKNSNIQKRRLTKKELKEINGGNGPVCVTTCFCNIDGEISIRPCSAKGVCC	rSAM_MODIFIED_RiPP	/	metagenome
family327	3300021425.a___Ga0213866_10000018	3300021425.a___Ga0213866_10000018_64 # 81130 # 81321 # 1 # ID=18_64;partial=00;start_type=ATG;rbs_motif=AAAA;rbs_spacer=11bp;gc_cont=0.354	MKKKNLKNLSLNKKAVSSLTYESAKGGAFSDGPICDTREPEFCNWTYNNWCYNTGNLWCTAPK	rSAM_MODIFIED_RiPP	/	metagenome
family337	3300024336.a___Ga0233447_1001001	3300024336.a___Ga0233447_1001001_8 # 6018 # 6203 # 1 # ID=1001_8;partial=00;start_type=ATG;rbs_motif=GGA/GAG/AGG;rbs_spacer=5-10bp;gc_cont=0.392	MSKEKKLTKQKRMEKAKGLVQELELLNLSKEELKKLYGGGGSDCPPPHQDVCPQAGCRDFG	rSAM_MODIFIED_RiPP	/	metagenome
family338	3300024336.a___Ga0233447_1001001	3300024336.a___Ga0233447_1001001_15 # 11518 # 11712 # -1 # ID=1001_15;partial=00;start_type=ATG;rbs_motif=GGAG/GAGG;rbs_spacer=5-10bp;gc_cont=0.344	MPKKTTLTKKERMKKARELMEELNDLKLSIQELDAISGGWNHFRNEPCPITEVKPGSHCDQSEY	LANTHIPEPTIDE	/	metagenome
family389	3300025093.a___Ga0208794_1025225	3300025093.a___Ga0208794_1025225_3 # 443 # 562 # -1 # ID=25225_3;partial=00;start_type=ATG;rbs_motif=AGGAG;rbs_spacer=5-10bp;gc_cont=0.717	MNPEDTTPDTTPEAAGPEAGLTAESLIEEVSIDGMCGVY	OTHER	ptm	metagenome
family389	3300025594_3	3300025594.a___Ga0209094_1000038_81 # 81105 # 81203 # -1 # ID=38_81;partial=00;start_type=ATG;rbs_motif=GGAG/GAGG;rbs_spacer=5-10bp;gc_cont=0.657	MNPEDTATDPEAALTAEDLIEEVSIDGMCGVY	OTHER	ptm	metagenome
family412	3300027997.a___Ga0255057_10001154	3300027997.a___Ga0255057_10001154_7 # 8704 # 8838 # -1 # ID=1154_7;partial=00;start_type=ATG;rbs_motif=GGA/GAG/AGG;rbs_spacer=5-10bp;gc_cont=0.570	MKVLRSRKQILNNVLKHRCIAAGNWAAGNWEIAMGGLIARLVIY	OTHER	/	metagenome
family413	3300027997.a___Ga0255057_10001992	3300027997.a___Ga0255057_10001992_5 # 3485 # 3589 # -1 # ID=1992_5;partial=00;start_type=ATG;rbs_motif=AGGAG;rbs_spacer=5-10bp;gc_cont=0.619	MLNETQLEWCESSPPDFSDLGALFLNCTLATALC	LANTHIPEPTIDE	/	metagenome
family414	3300027997.a___Ga0255057_10002826	3300027997.a___Ga0255057_10002826_2 # 1052 # 1198 # 1 # ID=2826_2;partial=00;start_type=ATG;rbs_motif=AGGA;rbs_spacer=5-10bp;gc_cont=0.619	MTQASSIKLDSGSRFPDIEFQLVDGSKLTLPGAWSGRWGTVIFYRGHW	LASSO_PEPTIDE	/	metagenome
family415	3300027997.a___Ga0255057_10006411	3300027997.a___Ga0255057_10006411_8 # 5653 # 5796 # 1 # ID=6411_8;partial=00;start_type=ATG;rbs_motif=GGAGG;rbs_spacer=5-10bp;gc_cont=0.618	MKAWYAAQSTPVRLLIGAVIGVVLVVGLLFVYDWIGTSFLDSGGSVG	LASSO_PEPTIDE	/	metagenome
family416	3300027997.a___Ga0255057_10008888	3300027997.a___Ga0255057_10008888_5 # 3921 # 4031 # -1 # ID=8888_5;partial=00;start_type=ATG;rbs_motif=GGA/GAG/AGG;rbs_spacer=5-10bp;gc_cont=0.685	MTDDPSVAVVASGGLTAKPSEALTGRGADRDRYGHW	LASSO_PEPTIDE	/	metagenome
family417	3300027997.a___Ga0255057_10010139	3300027997.a___Ga0255057_10010139_5 # 4377 # 4523 # -1 # ID=10139_5;partial=00;start_type=ATG;rbs_motif=TAA;rbs_spacer=12bp;gc_cont=0.190	MKETKEKENPNKNNVFNKIIFKLTFCIFFQNPENNQDNKLSFKDSNWK	AUTO_INDUCING_PEPTIDE	/	metagenome
family418	3300027997.a___Ga0255057_10011661	3300027997.a___Ga0255057_10011661_2 # 934 # 1062 # 1 # ID=11661_2;partial=00;start_type=ATG;rbs_motif=GGA/GAG/AGG;rbs_spacer=5-10bp;gc_cont=0.550	MRSKRSNGYDEPFMAACREELTVTGEHLVEGEYWVADCGVVC	LASSO_PEPTIDE	/	metagenome
family419	3300027997.a___Ga0255057_10012414	3300027997.a___Ga0255057_10012414_4 # 3335 # 3421 # 1 # ID=12414_4;partial=00;start_type=ATG;rbs_motif=GGA/GAG/AGG;rbs_spacer=5-10bp;gc_cont=0.621	MITLVAQDYGCGATEIAKSILCVAVVHG	LANTHIPEPTIDE	/	metagenome
family420	3300027997.a___Ga0255057_10014023	3300027997.a___Ga0255057_10014023_4 # 3422 # 3520 # -1 # ID=14023_4;partial=00;start_type=ATG;rbs_motif=GGA/GAG/AGG;rbs_spacer=5-10bp;gc_cont=0.616	MPSTYPSNVALPVVVHTQYGVSNADQSIIVQP	OTHER	/	metagenome
family421	3300027997.a___Ga0255057_10015197	3300027997.a___Ga0255057_10015197_4 # 2229 # 2339 # -1 # ID=15197_4;partial=00;start_type=ATG;rbs_motif=AGGAG;rbs_spacer=5-10bp;gc_cont=0.523	MRAICRYKSEPQLTIRSLKAGGHENQPLFQKVIKPL	LASSO_PEPTIDE	/	metagenome
family422	3300027997.a___Ga0255057_10016169	3300027997.a___Ga0255057_10016169_3 # 2404 # 2532 # 1 # ID=16169_3;partial=00;start_type=ATG;rbs_motif=GGA/GAG/AGG;rbs_spacer=5-10bp;gc_cont=0.620	MSESFLRPVRAAGQSAFAQGSGGPAEAISSFTGGGGEELSID	LASSO_PEPTIDE	/	metagenome
family423	3300027997.a___Ga0255057_10025275	3300027997.a___Ga0255057_10025275_2 # 965 # 1129 # 1 # ID=25275_2;partial=00;start_type=ATG;rbs_motif=GGA/GAG/AGG;rbs_spacer=5-10bp;gc_cont=0.412	MLKIKEIRTYCNQKLPKQATGTCSACPAYSTGLDLMTLVEKLTNPYKGQTSGLG	rSAM_MODIFIED_RiPP	/	metagenome
family424	3300027997.a___Ga0255057_10026009	3300027997.a___Ga0255057_10026009_2 # 293 # 352 # -1 # ID=26009_2;partial=00;start_type=ATG;rbs_motif=AGGAG;rbs_spacer=5-10bp;gc_cont=0.533	MKVKTNIQSGASWGGGDKY	OTHER	/	metagenome
family425	3300027997.a___Ga0255057_10027114	3300027997.a___Ga0255057_10027114_2 # 226 # 342 # -1 # ID=27114_2;partial=00;start_type=ATG;rbs_motif=AGGAGG;rbs_spacer=3-4bp;gc_cont=0.718	MSHEARGVIVGGGVLGERRWAKVLGEAAYDPASEKPRM	LASSO_PEPTIDE	/	metagenome
family426	3300027997.a___Ga0255057_10028314	3300027997.a___Ga0255057_10028314_3 # 838 # 1092 # 1 # ID=28314_3;partial=00;start_type=GTG;rbs_motif=AGGAG;rbs_spacer=5-10bp;gc_cont=0.616	MAETLESKLAETRAGSAKRYPAEVRQTMQKMYEDLEVSHVPHIIDVGDAAPDFTLGVAGSGEQVTLSEAVKSGPAVLSFYRGQW	LASSO_PEPTIDE	/	metagenome
family427	3300027997.a___Ga0255057_10048816	3300027997.a___Ga0255057_10048816_2 # 1760 # 1855 # 1 # ID=48816_2;partial=00;start_type=ATG;rbs_motif=AGGAG;rbs_spacer=5-10bp;gc_cont=0.573	MVTRTFLSALLAVCVWLGPAFAETEPLKTVG	AUTO_INDUCING_PEPTIDE	/	metagenome
family428	3300027997.a___Ga0255057_10059127	3300027997.a___Ga0255057_10059127_2 # 1393 # 1464 # 1 # ID=59127_2;partial=00;start_type=ATG;rbs_motif=GGAG/GAGG;rbs_spacer=5-10bp;gc_cont=0.625	MAVGATLTTFLEVTSCQYHQDKP	AUTO_INDUCING_PEPTIDE	/	metagenome
family429	3300027997.a___Ga0255057_10062418	3300027997.a___Ga0255057_10062418_2 # 675 # 890 # 1 # ID=62418_2;partial=00;start_type=ATG;rbs_motif=AGGAG;rbs_spacer=5-10bp;gc_cont=0.597	MKKKESIKSAPLSRRRFLKSAVAGGAAIAATAPLAGAGAARKETLTGKPKDPLEDVLPRYGSEFGDLRQVH	LASSO_PEPTIDE	/	metagenome
family430	3300027997.a___Ga0255057_10103315	3300027997.a___Ga0255057_10103315_1 # 159 # 314 # -1 # ID=103315_1;partial=00;start_type=ATG;rbs_motif=GGAG/GAGG;rbs_spacer=5-10bp;gc_cont=0.545	MKYEAPEIKDLGSVTDHTFTNSGLVPGVGPTGKNRNHPEYELDKFDEPSHS	LASSO_PEPTIDE	ptm	metagenome
family431	3300027997.a___Ga0255057_10111874	3300027997.a___Ga0255057_10111874_3 # 585 # 701 # 1 # ID=111874_3;partial=00;start_type=ATG;rbs_motif=GGAG/GAGG;rbs_spacer=5-10bp;gc_cont=0.513	MKSYVVPFFVALIACATLFLLLDVGVMNLMGLSLFFNP	LASSO_PEPTIDE	/	metagenome
family432	3300027997.a___Ga0255057_10135701	3300027997.a___Ga0255057_10135701_2 # 661 # 813 # 1 # ID=135701_2;partial=00;start_type=ATG;rbs_motif=GGAG/GAGG;rbs_spacer=5-10bp;gc_cont=0.608	MKSRDGKSPKKPYHRPRLLVYGDLRTLTRGVSFTGPPDSPPMGGMTLKMS	LASSO_PEPTIDE	ptm	metagenome
family432	3300027997.a___Ga0255057_10054394	3300027997.a___Ga0255057_10054394_2 # 561 # 707 # 1 # ID=54394_2;partial=00;start_type=ATG;rbs_motif=GGAG/GAGG;rbs_spacer=5-10bp;gc_cont=0.578	MKSRDSKSPKKPYHRPRLLVYGDLRTLTQAVGMTAAPDGAPLNLMIKS	LASSO_PEPTIDE	ptm	metagenome
family433	3300027997.a___Ga0255057_10143876	3300027997.a___Ga0255057_10143876_1 # 440 # 610 # 1 # ID=143876_1;partial=00;start_type=ATG;rbs_motif=GGAGG;rbs_spacer=5-10bp;gc_cont=0.567	MLGHRSEHKTTEIYAHYAPDYLGDAAAQLTSTSGNSNHTSTVAFEWRSRNSVLVAC	LASSO_PEPTIDE	/	metagenome
family434	3300027906_10	3300027906.a___Ga0209404_10002400_7 # 5481 # 5648 # -1 # ID=2400_7;partial=00;start_type=ATG;rbs_motif=GGAG/GAGG;rbs_spacer=5-10bp;gc_cont=0.589	MGAGPMGATVAALIVTTLGIAGVGVITSAGVVIVTIIHAIDWPADFRISVAGRSR	OTHER	/	metagenome
family436	GCA_002314375.1	DCFF01000007.1_436 # 496364 # 496528 # -1 # ID=50259_436;partial=00;start_type=ATG;rbs_motif=TAAA;rbs_spacer=11bp;gc_cont=0.394	MKNLRNNKLSREQLKGISGNGIIIGNCSNECCPTDGRPRCPRLICPAVVCPQYM	rSAM_MODIFIED_RiPP	/	metagenome
family436	GCA_002340165.1	DDKZ01000017.1_411 # 461075 # 461239 # -1 # ID=48437_411;partial=00;start_type=ATG;rbs_motif=TAAA;rbs_spacer=11bp;gc_cont=0.388	MKNLRNNKLSREQLKGISGNGIIIGNCSNECCPTDGRPRCPRLICPAVVCPQYM	rSAM_MODIFIED_RiPP	/	metagenome
family436	GCA_002421065.1	DIJE01000002.1_173 # 182861 # 183025 # 1 # ID=111119_173;partial=00;start_type=ATG;rbs_motif=TAAA;rbs_spacer=11bp;gc_cont=0.394	MKNLRNNKLSREQLKGISGNGIIIGNCSNECCPTDGRPRCPRLICPAVVCPQYM	rSAM_MODIFIED_RiPP	/	metagenome
family436	GCA_002429685.1	DJAQ01000199.1_23 # 19780 # 19944 # -1 # ID=39930_23;partial=00;start_type=ATG;rbs_motif=TAAA;rbs_spacer=11bp;gc_cont=0.394	MKNLRNNKLSREQLKGISGNGIIIGNCSNECCPTDGRPRCPRLICPAVVCPQYM	rSAM_MODIFIED_RiPP	/	metagenome
family436	GCA_002472905.1	DKSW01000002.1_2 # 410 # 574 # 1 # ID=98090_2;partial=00;start_type=ATG;rbs_motif=TAAA;rbs_spacer=11bp;gc_cont=0.394	MKNLRNNKLSREQLKGISGNGIIIGNCSNECCPTDGRPRCPRLICPAVVCPQYM	rSAM_MODIFIED_RiPP	/	metagenome
family436	GCA_002476825.1	DLML01000021.1_2 # 1019 # 1183 # 1 # ID=32245_2;partial=00;start_type=ATG;rbs_motif=TAAA;rbs_spacer=11bp;gc_cont=0.394	MKNLRNNKLSREQLKGISGNGIIIGNCSNECCPTDGRPRCPRLICPAVVCPQYM	rSAM_MODIFIED_RiPP	/	metagenome
family436	GCA_002338325.1	DDIB01000004.1_355 # 392310 # 392474 # -1 # ID=29796_355;partial=00;start_type=ATG;rbs_motif=TAAA;rbs_spacer=11bp;gc_cont=0.412	MKKLRNNKLSREQLKGISGSGIIIGNCSNQCCPDDGRPRCPGLICPAVVCPQYV	rSAM_MODIFIED_RiPP	/	metagenome
family438	GCA_002338325.1	DDIB01000007.1_197 # 206604 # 206744 # -1 # ID=11081_197;partial=00;start_type=ATG;rbs_motif=TAAA;rbs_spacer=9bp;gc_cont=0.447	MKNAKLLSRDAQKTVSGGNATARLVCCERDDSGKCILWIGPGQHCP	rSAM_MODIFIED_RiPP	/	metagenome
family438	GCA_002392055.1	DGGF01000015.1_44 # 60009 # 60149 # 1 # ID=31383_44;partial=00;start_type=ATG;rbs_motif=TAAA;rbs_spacer=9bp;gc_cont=0.468	MKNAKLLSRDAQKAVSGGNATARLVCCERDDSGKCILWIGPGQHCP	rSAM_MODIFIED_RiPP	/	metagenome
family505	BGEO_SAMN07136860_METAG-scaffold_22327	BGEO_SAMN07136860_METAG-scaffold_22327_2 # 681 # 788 # -1 # ID=1016035_2;partial=00;start_type=ATG;rbs_motif=GGA/GAG/AGG;rbs_spacer=3-4bp;gc_cont=0.463	MITTEAMVSDIPEENAGGGMPGGMPPGMGGMDGMM	LASSO_PEPTIDE	/	metagenome
family506	TARA_SAMEA4397118_METAG_AGDBFJOP	TARA_SAMEA4397118_METAG-scaffold_2_262 # 290701 # 290913 # -1 # ID=1_262;partial=00;start_type=ATG;rbs_motif=AGGAG;rbs_spacer=5-10bp;gc_cont=0.451	MDDTKTEASSKKSIKKKRKYKKPTLKTETLEKAYATSMGGGGGGGGKTCNGAANGGRKATAGAGCSVLLT	LASSO_PEPTIDE	ptm	metagenome
family508	TARA_SAMEA2621242_METAG_GMIEJGMJ	TARA_SAMEA2621242_METAG-scaffold_404_40 # 47161 # 47352 # -1 # ID=20738_40;partial=00;start_type=ATG;rbs_motif=AAAA;rbs_spacer=3bp;gc_cont=0.297	MKKIQLNKGLNLNKEAITRLQDVQMSNLRGGVRSISCLQFTCNSSCNNGTCNGSADQQLDFTR	rSAM_MODIFIED_RiPP	ptm	metagenome
family508	TARA_SAMEA2622763_METAG-scaffold_90999	TARA_SAMEA2622763_METAG-scaffold_90999_1 # 79 # 261 # -1 # ID=1153938_1;partial=00;start_type=ATG;rbs_motif=TAA;rbs_spacer=12bp;gc_cont=0.328	MKKIQLNKGLSLNKEAITKLQEGQLSNVKGGVRGVTCANVSCAASCNENSCNHQADQILQ	rSAM_MODIFIED_RiPP	/	metagenome
family508	TARA_SAMEA2621221_METAG_KCGAGCCJ	TARA_SAMEA2621221_METAG-scaffold_20658_1 # 83 # 268 # -1 # ID=171062_1;partial=00;start_type=ATG;rbs_motif=TAA;rbs_spacer=12bp;gc_cont=0.306	MKKIQLNKGLSLNKEAITKLQEDQLSNVKGGVRGVTCANASCANSCNQNSCNAQVDQVLER	rSAM_MODIFIED_RiPP	/	metagenome
family508	TARA_SAMEA2621242_METAG_GMIEJGMJ	TARA_SAMEA2621242_METAG-scaffold_404_41 # 47437 # 47622 # -1 # ID=20738_41;partial=00;start_type=ATG;rbs_motif=TAA;rbs_spacer=12bp;gc_cont=0.301	MKKIQLNKGLSLNKEAITKLQEDQLSNVKGGVRGVTCANASCANSCNQNSCNAQVDQVLER	rSAM_MODIFIED_RiPP	ptm	metagenome
family508	k127_12893301	k127_12893301_94 # 101758 # 101940 # 1 # ID=66816_94;partial=00;start_type=ATG;rbs_motif=TAA;rbs_spacer=12bp;gc_cont=0.333	MKKIQLNKGLSLNKEAITKLQEDQLSNVKGGVRGVTCANASCAASCNQNSCNHQADQVLQ	rSAM_MODIFIED_RiPP	ptm	metagenome
family508	k127_12893301	k127_12893301_95 # 101988 # 102170 # 1 # ID=66816_95;partial=00;start_type=ATG;rbs_motif=TAA;rbs_spacer=12bp;gc_cont=0.290	MKKIQLNKGLSLNKEAITKLQENQLSNVKGGVKGFTCANASCAASCNQNSCNAQADQSLQ	rSAM_MODIFIED_RiPP	ptm	metagenome
family508	k127_12893301	k127_12893301_96 # 102218 # 102403 # 1 # ID=66816_96;partial=00;start_type=ATG;rbs_motif=TAA;rbs_spacer=12bp;gc_cont=0.312	MKKIQLNKGLSLNKEAITKLQEDQLSNVKGGVRGVTCANASCANSCNQNSCNAQADQVLDR	rSAM_MODIFIED_RiPP	ptm	metagenome
family508	k127_12893301	k127_12893301_97 # 102487 # 102678 # 1 # ID=66816_97;partial=00;start_type=ATG;rbs_motif=AAAA;rbs_spacer=3bp;gc_cont=0.297	MKKIQLNKGLSLNKEAITRLQDVQMSNLRGGVKSISCIQLTCNSSCNNGTCNGSADQQLDFTR	rSAM_MODIFIED_RiPP	ptm	metagenome
family509	TARA_SAMEA2730749_METAG-scaffold_1217	TARA_SAMEA2730749_METAG-scaffold_1217_25 # 25637 # 25738 # 1 # ID=22760_25;partial=00;start_type=ATG;rbs_motif=TAAAAA;rbs_spacer=9bp;gc_cont=0.422	MPQTLTNFLKKVPGIIDSFGSGTYEKGYWWVKF	LASSO_PEPTIDE	/	metagenome
family510	TARA_SAMEA4397278_METAG_OPFOENPA	TARA_SAMEA4397278_METAG-scaffold_4268_11 # 11716 # 11856 # 1 # ID=43587_11;partial=00;start_type=ATG;rbs_motif=GGA/GAG/AGG;rbs_spacer=5-10bp;gc_cont=0.426	MQGTSITVDGGVVGVCVGVVVTVVVGVVVAVVVVVVVVGGVVVCCC	OTHER	/	metagenome
family511	TARA_SAMEA2623295_METAG-scaffold_7716	TARA_SAMEA2623295_METAG-scaffold_7716_2 # 257 # 478 # 1 # ID=52320_2;partial=00;start_type=ATG;rbs_motif=TAA;rbs_spacer=8bp;gc_cont=0.360	MSKINHTDHIKAHLNVAWLRPESTLWDVIVSTMISKYENKPPSLDLGCGNGIFSLITAGGGEFSVDYDWYINF	LASSO_PEPTIDE	ptm	metagenome
family512	TARA_SAMEA4396941_METAG_AOBPNINP	TARA_SAMEA4396941_METAG-scaffold_10667_6 # 3583 # 3738 # 1 # ID=52452_6;partial=00;start_type=ATG;rbs_motif=GGAG/GAGG;rbs_spacer=5-10bp;gc_cont=0.641	MDSDVMRDQTVPSDTVPRPIWVRPTLSDYDIAGNTAITNCGTGSDGVICNS	LANTHIPEPTIDE	ptm	metagenome
family513	TARA_SAMEA2621779_METAG-scaffold_7223	TARA_SAMEA2621779_METAG-scaffold_7223_5 # 2254 # 2352 # -1 # ID=65234_5;partial=00;start_type=ATG;rbs_motif=AGGAG;rbs_spacer=5-10bp;gc_cont=0.384	MPTKKVTDKNFEAEVLKADKPVLVDFWAPWCW	LASSO_PEPTIDE	/	metagenome
family537	3300027883.a___Ga0209713_10023490	3300027883.a___Ga0209713_10023490_2 # 1714 # 1881 # -1 # ID=23490_2;partial=00;start_type=GTG;rbs_motif=GGGGGT;rbs_spacer=10bp;gc_cont=0.774	MAAAEVAVEAAAAEAVATEPSALAGLSAGFAVAVAVEVEAEVVVEVATAAAAAAD	OTHER	/	metagenome
family538	3300027883.a___Ga0209713_10278843	3300027883.a___Ga0209713_10278843_2 # 215 # 430 # -1 # ID=278783_2;partial=00;start_type=GTG;rbs_motif=AGGA;rbs_spacer=5-10bp;gc_cont=0.556	MRMRRRRLGAEKELQQPFFVEPGVLFKTMCTDQVRGQSEQKEEHVLNTGILAETGRGGTSMWVQMTQDEDC	GRASPETIDE	/	metagenome
family539	TARA_SAMEA2619782_METAG-scaffold_186156	TARA_SAMEA2619782_METAG-scaffold_186156_2 # 611 # 793 # 1 # ID=886913_2;partial=00;start_type=ATG;rbs_motif=AGGA;rbs_spacer=5-10bp;gc_cont=0.574	MDIVKRVINNVASRKLAVTAAAGAVAGAVAATGTIEMTWPIAVAVAYIAGQTLSAVPKRA	OTHER	/	metagenome
family540	TARA_SAMEA2621839_METAG-scaffold_229307	TARA_SAMEA2621839_METAG-scaffold_229307_2 # 523 # 669 # 1 # ID=960060_2;partial=00;start_type=ATG;rbs_motif=GGA/GAG/AGG;rbs_spacer=5-10bp;gc_cont=0.354	MEKENNSSWEEPEIKELGKAKDLIKGLSPVFDAKTGLTPVDEFNAVQS	LASSO_PEPTIDE	ptm	metagenome
[truncated: 377,723+ more rows]

## Sheet: Supplementary Data 4
T	Type	Method	qD	qD_LCL	qD_UCL	SC	SC_LCL	SC_UCL
[truncated: 4,000 more rows]

## Sheet: Supplementary Data 5
i	t	method	order	qD	qD_LCL	qD_UCL	SC	SC_LCL	SC_UCL
[truncated: 9,670 more rows]

[truncated: 4 more sheets: Supplementary Data 6, Supplementary Data 7, Supplementary Data 8, Supplementary Data 9]
