# Supplementary material for: Exploring the Roles of Ribosomal Peptides in Prokaryote-Phage Interactions through Deep Learning-Enabled Metagenome Mining
Source: Research Square preprint supplement (doi:10.21203/rs.3.rs-3594555/v1), 2023-12-07
Supplement: Supplementary file 3 [file a558164874be576c7fad9861.xlsx]

## Sheet: README
Supplementary Data 10	The MAGs and the corresponding OTUs from the GEM dataset used for the comparison of five ecosystems.
Supplementary Data 11	The accessions of Isolated marine microbial genomes
Supplementary Data 12	The accessions of marine metagenomes and metatranscriptomes
Supplementary Data 13	3,013 unique RiPPs precursors annotated by antiSMASH from 22,789 bacterial complete genomes in RefSeq
Protein	The ORF id of RiPP PTM enzyme
Type, Subclass	RiPP class annotated by antiSMASH
precursor	The ORF id of RiPP precursor
DL predicted class	The RiPP class predicted by TrRiPP
Supplementary Data 14	The precursor sequences and cluster information of RiPP BGCs deposited in NPAtlas database
Supplementary Data 15	The taxonomy of RiPP-encoding scaffolds and genomes.
contigs/genomes	RiPP-encoding scaffolds or genomes
k__Viruses	The percentage of Virus signals detected in the quried scaffold/genome sequence by BLASTN
k__Bacteria	The percentage of Bacteria signals detected in the quried scaffold/genome sequence by BLASTN
k__Eukaryota	The percentage of Eukaryota signals detected in the quried scaffold/genome sequence by BLASTN
k__Archaea	The percentage of Archaea signals detected in the quried scaffold/genome sequence by BLASTN
k__unassigned	The percentage of unassigned signals detected in the quried scaffold/genome sequence by BLASTN
viral	The percentage of viral signals detected in the quried scaffold/genome sequence using the method described in Figure S22 and Methods
blastn_tax	The taxonomy classification of the quried scaffold/genome sequence using the method described in Figure S28 and Methods
CAT_GTDB_tax	The taxonomy classification of the quried scaffold/genome sequence using CAT (contigs) or GTDB (genomes)
final_tax	The final taxonomy of the quried scaffold/genome sequence based on the principle described in Methods
final_tax(unify taxonomy classified by NCBI and GTDB)	To unify the taxonomy classified by NCBI and GTDB, ncbi-gtdb_map.py from https://github.com/nick-youngblut/gtdb_to_taxdump.git was used to convert NCBI taxdump to GTDB taxonomy
classification tool	CAT for scaffolds, GTDB for genomes
used in this study	whether the scaffold/genome was used in this study
Supplementary Data 16	The extracted RiPP precursor sequences from publicly available databases, including MiBIG3, BIG-FAM and OMD
Supplementary Data 17	Model performance comparison of 10-fold cross-validation
binary_tn, fp, fn, tp	The number of true negatives, false positives, false negatives, and true positives in binary classification (RiPPs vs. non-RiPP)
binary_acc, precision, recall, f1, mcc, auroc	Metrics for binary classification
acc, weighted_f1, kappa	Metrics for multiclass classification (classification of RiPPs into different classes)
Supplementary Data 18	The potential of RiPP production was described as the number of RiPPs encoded by different prokaryotic phyla
Supplementary Data 19	The potential of RiPP production was described as the number of RiPPs encoded by different prokaryotic phyla per kilo base pair

## Sheet: Supplementary Data 10
id	ecosystem	OUT
3300028580_9	Engineered	OTU-297
3300028580_5	Engineered	OTU-9378
3300028580_7	Engineered	OTU-56
3300008630_11	Host-associated	OTU-340
3300014593_1	Engineered	OTU-16640
3300023299_4	Non-Marine-Aquatic	OTU-789
3300022470_15	Non-Marine-Aquatic	OTU-221
3300022470_16	Non-Marine-Aquatic	OTU-1487
3300022470_13	Non-Marine-Aquatic	OTU-225
3300007738_2	Host-associated	OTU-9304
3300022741_21	Host-associated	OTU-4109
3300029033_11	Host-associated	OTU-8643
3300004628_8	Engineered	OTU-56
3300004628_1	Engineered	OTU-9378
3300004628_7	Engineered	OTU-17220
3300004628_6	Engineered	OTU-11887
3300004628_4	Engineered	OTU-11884
3300000154_21	Marine	OTU-3641
3300027577_5	Terrestrial	OTU-584
3300007104_17	Host-associated	OTU-619
3300007104_14	Host-associated	OTU-1379
3300007104_12	Host-associated	OTU-13299
3300018058_14	Terrestrial	OTU-97
3300028564_48	Engineered	OTU-5320
3300011235_2	Engineered	OTU-14327
3300011235_1	Engineered	OTU-1759
3300010998_23	Host-associated	OTU-777
3300010998_21	Host-associated	OTU-779
3300010998_27	Host-associated	OTU-8340
3300010998_26	Host-associated	OTU-780
3300010998_25	Host-associated	OTU-781
3300010998_24	Host-associated	OTU-782
3300010998_29	Host-associated	OTU-783
3300010998_28	Host-associated	OTU-784
3300021472_34	Non-Marine-Aquatic	OTU-979
3300023299_6	Non-Marine-Aquatic	OTU-12304
3300006192_54	Non-Marine-Aquatic	OTU-6422
3300027659_6	Non-Marine-Aquatic	OTU-4749
3300027659_3	Non-Marine-Aquatic	OTU-1031
3300008269_27	Host-associated	OTU-11870
3300008269_26	Host-associated	OTU-1061
3300008269_21	Host-associated	OTU-4772
3300008269_20	Host-associated	OTU-17343
3300008269_22	Host-associated	OTU-2031
3300008269_29	Host-associated	OTU-15345
3300008269_28	Host-associated	OTU-14182
3300020464_29	Marine	OTU-4110
3300002977_18	Engineered	OTU-6145
3300027592_25	Engineered	OTU-2299
3300021400_160	Host-associated	OTU-2460
3300011879_3	Engineered	OTU-6507
3300029119_19	Host-associated	OTU-7875
3300029119_18	Host-associated	OTU-2849
3300029119_15	Host-associated	OTU-3269
3300029119_17	Host-associated	OTU-13648
3300029119_16	Host-associated	OTU-2478
3300029119_10	Host-associated	OTU-7204
3300029119_13	Host-associated	OTU-1414
3300011990_9	Host-associated	OTU-1416
3300011990_5	Host-associated	OTU-8994
3300027335_9	Non-Marine-Aquatic	OTU-4749
3300007109_9	Host-associated	OTU-1680
3300007109_6	Host-associated	OTU-1996
3300007109_7	Host-associated	OTU-8482
3300007109_4	Host-associated	OTU-16537
3300007109_5	Host-associated	OTU-17151
3300007109_2	Host-associated	OTU-16801
3300000234_50	Non-Marine-Aquatic	OTU-1154
3300000234_57	Non-Marine-Aquatic	OTU-10614
3300000234_54	Non-Marine-Aquatic	OTU-1708
3300000234_55	Non-Marine-Aquatic	OTU-10495
3300027839_66	Marine	OTU-1834
3300027839_62	Marine	OTU-862
3300027839_61	Marine	OTU-14362
3300027839_68	Marine	OTU-15703
3300024247_11	Marine	OTU-11787
3300009769_17	Engineered	OTU-305
3300026279_24	Marine	OTU-11470
3300005964_4	Non-Marine-Aquatic	OTU-6307
3300023253_11	Non-Marine-Aquatic	OTU-6808
3300025904_20	Host-associated	OTU-1209
3300010156_1	Non-Marine-Aquatic	OTU-5420
3300019861_14	Engineered	OTU-15749
3300019861_16	Engineered	OTU-15758
3300019861_17	Engineered	OTU-2561
3300019861_18	Engineered	OTU-15785
3300019861_19	Engineered	OTU-6397
3300020477_39	Marine	OTU-2826
3300020477_33	Marine	OTU-12403
3300020477_34	Marine	OTU-17297
3300029935_3	Engineered	OTU-2861
3300028091_4	Non-Marine-Aquatic	OTU-12502
3300026193_14	Marine	OTU-1358
3300026193_17	Marine	OTU-17196
3300026193_11	Marine	OTU-2941
3300026193_12	Marine	OTU-466
3300007499_8	Host-associated	OTU-4987
3300007499_5	Host-associated	OTU-15292
3300007499_6	Host-associated	OTU-1379
3300007499_1	Host-associated	OTU-9640
3300007499_2	Host-associated	OTU-12318
3300029209_7	Host-associated	OTU-8294
3300029135_19	Host-associated	OTU-3559
3300007714_15	Host-associated	OTU-7970
3300007714_16	Host-associated	OTU-3269
3300007714_17	Host-associated	OTU-6831
3300007714_10	Host-associated	OTU-8294
3300029135_16	Host-associated	OTU-13648
3300029135_15	Host-associated	OTU-15901
3300027848_177	Non-Marine-Aquatic	OTU-1373
3300025698_30	Non-Marine-Aquatic	OTU-3195
3300025698_32	Non-Marine-Aquatic	OTU-6808
3300029752_18	Host-associated	OTU-11350
3300029752_19	Host-associated	OTU-9493
3300029752_12	Host-associated	OTU-14746
3300029752_13	Host-associated	OTU-7680
3300029752_10	Host-associated	OTU-3007
3300029752_11	Host-associated	OTU-8643
3300029752_16	Host-associated	OTU-6928
3300029752_17	Host-associated	OTU-2990
3300029752_14	Host-associated	OTU-15004
3300025432_9	Non-Marine-Aquatic	OTU-4008
3300025432_8	Non-Marine-Aquatic	OTU-7685
3300025432_4	Non-Marine-Aquatic	OTU-2500
3300025432_7	Non-Marine-Aquatic	OTU-11915
3300011160_1	Engineered	OTU-3348
3300025636_49	Marine	OTU-17372
3300029712_18	Host-associated	OTU-3419
3300029712_19	Host-associated	OTU-7257
3300029712_16	Host-associated	OTU-15179
3300029712_17	Host-associated	OTU-4615
3300029712_15	Host-associated	OTU-3421
3300029712_12	Host-associated	OTU-3422
3300029712_13	Host-associated	OTU-6831
3300029712_11	Host-associated	OTU-3269
3300025720_27	Engineered	OTU-13893
3300027852_12	Non-Marine-Aquatic	OTU-3653
3300025272_18	Host-associated	OTU-710
3300025272_13	Host-associated	OTU-16342
3300025272_12	Host-associated	OTU-9122
3300025272_11	Host-associated	OTU-376
3300025272_10	Host-associated	OTU-374
3300025272_17	Host-associated	OTU-3710
3300025272_16	Host-associated	OTU-17555
3300025272_15	Host-associated	OTU-3712
3300025272_14	Host-associated	OTU-16341
3300000558_30	Engineered	OTU-7451
3300000558_38	Engineered	OTU-5031
3300027555_7	Non-Marine-Aquatic	OTU-3954
3300027555_6	Non-Marine-Aquatic	OTU-11601
3300024260_33	Marine	OTU-3563
3300027555_8	Non-Marine-Aquatic	OTU-11830
3300013006_35	Non-Marine-Aquatic	OTU-2404
3300013006_34	Non-Marine-Aquatic	OTU-4026
3300013006_31	Non-Marine-Aquatic	OTU-2406
3300013006_30	Non-Marine-Aquatic	OTU-11161
3300013006_39	Non-Marine-Aquatic	OTU-4031
3300013006_38	Non-Marine-Aquatic	OTU-6250
3300026947_3	Terrestrial	OTU-17523
3300026947_2	Terrestrial	OTU-14779
3300012494_1	Host-associated	OTU-6652
3300025192_3	Marine	OTU-6227
3300025192_1	Marine	OTU-2458
3300005238_4	Terrestrial	OTU-11778
3300029616_11	Host-associated	OTU-8643
3300029616_13	Host-associated	OTU-17151
3300023211_11	Engineered	OTU-6243
3300007977_5	Host-associated	OTU-920
3300007977_4	Host-associated	OTU-11836
3300007977_3	Host-associated	OTU-5034
3300007977_8	Host-associated	OTU-5637
3300025503_12	Non-Marine-Aquatic	OTU-10331
3300025503_10	Non-Marine-Aquatic	OTU-4669
3300025503_11	Non-Marine-Aquatic	OTU-4670
3300025503_16	Non-Marine-Aquatic	OTU-4671
3300025503_17	Non-Marine-Aquatic	OTU-4672
3300020427_8	Marine	OTU-16944
3300020427_9	Marine	OTU-14798
3300020427_6	Marine	OTU-9659
3300007517_88	Non-Marine-Aquatic	OTU-4761
3300014551_11	Host-associated	OTU-10265
3300014551_10	Host-associated	OTU-9955
3300014551_13	Host-associated	OTU-3273
3300014551_12	Host-associated	OTU-8294
3300027726_15	Non-Marine-Aquatic	OTU-13123
3300025451_1	Marine	OTU-4998
3300029884_20	Host-associated	OTU-5075
3300029884_23	Host-associated	OTU-9258
3300009040_3	Host-associated	OTU-5403
3300002163_10	Engineered	OTU-5178
3300002163_19	Engineered	OTU-16391
3300024353_34	Non-Marine-Aquatic	OTU-5229
3300024353_30	Non-Marine-Aquatic	OTU-13754
3300002167_47	Engineered	OTU-11
3300002167_44	Engineered	OTU-6
3300009503_103	Non-Marine-Aquatic	OTU-2710
3300025706_45	Engineered	OTU-5331
3300025706_46	Engineered	OTU-11393
3300025161_41	Non-Marine-Aquatic	OTU-9022
3300025161_40	Non-Marine-Aquatic	OTU-807
3300025161_43	Non-Marine-Aquatic	OTU-5354
3300025161_45	Non-Marine-Aquatic	OTU-16940
3300025161_44	Non-Marine-Aquatic	OTU-811
3300025161_47	Non-Marine-Aquatic	OTU-13121
3300029042_18	Host-associated	OTU-4569
3300029042_16	Host-associated	OTU-3518
3300029042_17	Host-associated	OTU-1341
3300029042_14	Host-associated	OTU-6831
3300029042_12	Host-associated	OTU-15885
3300029042_13	Host-associated	OTU-3314
3300029042_10	Host-associated	OTU-14765
3300029042_11	Host-associated	OTU-5392
3300017987_31	Non-Marine-Aquatic	OTU-4153
3300017987_37	Non-Marine-Aquatic	OTU-11303
3300017987_36	Non-Marine-Aquatic	OTU-4990
3300014502_33	Terrestrial	OTU-15963
3300014502_30	Terrestrial	OTU-15978
3300028177_4	Marine	OTU-6901
3300014670_3	Engineered	OTU-3796
3300014670_2	Engineered	OTU-4915
3300006904_22	Host-associated	OTU-5689
3300013138_149	Non-Marine-Aquatic	OTU-871
3300007356_23	Host-associated	OTU-10659
3300025982_1	Terrestrial	OTU-12021
3300025938_16	Host-associated	OTU-17237
3300025938_10	Host-associated	OTU-5821
3300025938_13	Host-associated	OTU-8209
3300012178_8	Non-Marine-Aquatic	OTU-169
3300024230_9	Marine	OTU-2208
3300029235_17	Host-associated	OTU-7210
3300008269_6	Host-associated	OTU-10685
3300008269_5	Host-associated	OTU-920
3300008269_3	Host-associated	OTU-5482
3300027863_320	Non-Marine-Aquatic	OTU-931
3300027276_56	Terrestrial	OTU-10283
3300027276_52	Terrestrial	OTU-6054
3300025616_9	Non-Marine-Aquatic	OTU-15341
3300026250_22	Engineered	OTU-6766
3300026250_24	Engineered	OTU-3739
3300026250_27	Engineered	OTU-326
3300026250_26	Engineered	OTU-8067
3300011118_30	Non-Marine-Aquatic	OTU-6249
3300011118_35	Non-Marine-Aquatic	OTU-6251
3300011118_36	Non-Marine-Aquatic	OTU-6252
3300021120_2	Non-Marine-Aquatic	OTU-6263
3300027976_89	Non-Marine-Aquatic	OTU-1247
3300027976_84	Non-Marine-Aquatic	OTU-1099
3300027976_80	Non-Marine-Aquatic	OTU-8760
3300024938_3	Non-Marine-Aquatic	OTU-6522
3300015202_8	Terrestrial	OTU-7068
3300025719_39	Marine	OTU-3583
3300025719_33	Marine	OTU-12091
3300025719_32	Marine	OTU-681
3300020389_17	Marine	OTU-6616
3300020389_19	Marine	OTU-6620
3300020389_18	Marine	OTU-6621
3300008688_29	Host-associated	OTU-6647
3300011797_2	Engineered	OTU-13061
3300011797_1	Engineered	OTU-13062
3300029546_10	Host-associated	OTU-9857
3300025584_17	Marine	OTU-1455
3300025584_15	Marine	OTU-7162
3300025584_13	Marine	OTU-7164
3300025584_12	Marine	OTU-2393
3300025584_19	Marine	OTU-6994
3300017950_24	Non-Marine-Aquatic	OTU-6921
3300017950_25	Non-Marine-Aquatic	OTU-13041
3300017950_26	Non-Marine-Aquatic	OTU-14037
3300017950_28	Non-Marine-Aquatic	OTU-7373
3300017950_29	Non-Marine-Aquatic	OTU-11262
3300029076_5	Host-associated	OTU-9570
3300029076_3	Host-associated	OTU-16537
3300006456_6	Host-associated	OTU-7543
3300007297_12	Host-associated	OTU-14730
3300013133_69	Non-Marine-Aquatic	OTU-6129
3300013133_68	Non-Marine-Aquatic	OTU-17055
3300013133_63	Non-Marine-Aquatic	OTU-7601
3300026140_6	Non-Marine-Aquatic	OTU-7603
3300026140_7	Non-Marine-Aquatic	OTU-7604
3300013133_65	Non-Marine-Aquatic	OTU-7605
3300011503_2	Engineered	OTU-11403
3300011503_1	Engineered	OTU-1759
3300014760_11	Host-associated	OTU-5029
3300014760_10	Host-associated	OTU-10843
3300025788_3	Non-Marine-Aquatic	OTU-18026
3300025788_5	Non-Marine-Aquatic	OTU-11909
3300025788_4	Non-Marine-Aquatic	OTU-1941
3300027343_1	Engineered	OTU-12979
3300027343_3	Engineered	OTU-5325
3300027343_4	Engineered	OTU-1542
3300027343_8	Engineered	OTU-9320
3300027343_9	Engineered	OTU-1544
3300021603_27	Engineered	OTU-7886
3300025640_21	Marine	OTU-13041
3300025640_27	Marine	OTU-11123
3300025640_25	Marine	OTU-3776
3300025640_24	Marine	OTU-8764
3300017941_28	Non-Marine-Aquatic	OTU-7465
3300017941_22	Non-Marine-Aquatic	OTU-3215
3300017941_21	Non-Marine-Aquatic	OTU-17754
3300027209_1	Terrestrial	OTU-13322
3300025729_40	Marine	OTU-8107
3300025695_37	Marine	OTU-6132
3300025695_32	Marine	OTU-8346
3300025695_39	Marine	OTU-11536
3300014085_1	Host-associated	OTU-1837
3300008581_18	Host-associated	OTU-10766
3300008581_12	Host-associated	OTU-1061
3300002931_12	Host-associated	OTU-8505
3300002931_10	Host-associated	OTU-15190
3300002931_11	Host-associated	OTU-8508
3300025277_10	Marine	OTU-14799
3300025277_11	Marine	OTU-9862
3300025277_12	Marine	OTU-8785
3300025277_13	Marine	OTU-6650
3300025277_14	Marine	OTU-9264
3300025277_16	Marine	OTU-12720
3300020406_28	Marine	OTU-15774
3300020406_29	Marine	OTU-16742
3300027966_3	Host-associated	OTU-8897
3300027966_5	Host-associated	OTU-8898
3300020406_23	Marine	OTU-15882
3300020406_20	Marine	OTU-7669
3300027966_6	Host-associated	OTU-8901
3300029119_14	Host-associated	OTU-1410
3300029119_11	Host-associated	OTU-1412
3300014970_8	Host-associated	OTU-11606
3300014970_3	Host-associated	OTU-1996
3300014970_1	Host-associated	OTU-8482
3300014970_7	Host-associated	OTU-17399
3300014970_4	Host-associated	OTU-11090
3300014970_5	Host-associated	OTU-9512
3300011987_3	Terrestrial	OTU-9891
3300011987_2	Terrestrial	OTU-13486
3300029229_11	Host-associated	OTU-7210
3300029325_8	Host-associated	OTU-13081
3300029325_7	Host-associated	OTU-8558
3300029325_5	Host-associated	OTU-11888
3300017399_3	Non-Marine-Aquatic	OTU-11408
3300017399_1	Non-Marine-Aquatic	OTU-9309
3300017399_6	Non-Marine-Aquatic	OTU-13962
3300017399_4	Non-Marine-Aquatic	OTU-6210
3300002065_2	Host-associated	OTU-4225
3300002065_3	Host-associated	OTU-9328
3300013885_10	Engineered	OTU-4414
3300029251_35	Host-associated	OTU-10259
3300029251_32	Host-associated	OTU-2115
3300029251_33	Host-associated	OTU-7251
3300002039_14	Host-associated	OTU-9540
3300002039_17	Host-associated	OTU-17613
3300002039_10	Host-associated	OTU-9542
3300002039_18	Host-associated	OTU-9548
3300020190_44	Non-Marine-Aquatic	OTU-12820
3300020190_40	Non-Marine-Aquatic	OTU-15772
3300020190_42	Non-Marine-Aquatic	OTU-3095
3300020190_43	Non-Marine-Aquatic	OTU-3094
3300020190_48	Non-Marine-Aquatic	OTU-5679
3300020190_49	Non-Marine-Aquatic	OTU-10321
3300029887_26	Host-associated	OTU-9424
3300029887_27	Host-associated	OTU-9333
3300029887_22	Host-associated	OTU-10747
3300029887_23	Host-associated	OTU-10259
3300000239_11	Marine	OTU-8107
3300000239_13	Marine	OTU-6994
3300000239_15	Marine	OTU-4530
3300000239_16	Marine	OTU-12091
3300008616_2	Host-associated	OTU-1568
3300021426_35	Host-associated	OTU-5222
3300006565_6	Marine	OTU-9426
3300021426_31	Host-associated	OTU-2289
3300021426_38	Host-associated	OTU-17066
3300029559_33	Host-associated	OTU-2245
3300029559_31	Host-associated	OTU-1857
3300029559_30	Host-associated	OTU-3617
3300029559_35	Host-associated	OTU-12398
3300029559_34	Host-associated	OTU-7531
3300027838_68	Marine	OTU-11249
3300014700_3	Engineered	OTU-3115
3300014700_6	Engineered	OTU-16833
3300026472_10	Host-associated	OTU-10123
3300026472_11	Host-associated	OTU-10124
3300027154_6	Non-Marine-Aquatic	OTU-17381
3300027154_4	Non-Marine-Aquatic	OTU-5805
3300027154_5	Non-Marine-Aquatic	OTU-4752
3300027154_8	Non-Marine-Aquatic	OTU-4749
3300027154_9	Non-Marine-Aquatic	OTU-12609
3300022853_9	Non-Marine-Aquatic	OTU-14135
3300010269_19	Engineered	OTU-12273
3300010269_18	Engineered	OTU-17516
3300010269_17	Engineered	OTU-11148
3300010269_16	Engineered	OTU-10203
3300010269_15	Engineered	OTU-10204
3300010269_11	Engineered	OTU-5324
3300022853_4	Non-Marine-Aquatic	OTU-10206
3300013103_94	Non-Marine-Aquatic	OTU-509
3300013103_97	Non-Marine-Aquatic	OTU-15958
3300013103_90	Non-Marine-Aquatic	OTU-10272
3300013103_99	Non-Marine-Aquatic	OTU-2153
3300014537_4	Host-associated	OTU-16537
3300014537_9	Host-associated	OTU-13479
3300012983_8	Host-associated	OTU-11090
3300025470_9	Non-Marine-Aquatic	OTU-14842
3300025470_7	Non-Marine-Aquatic	OTU-14662
3300025470_3	Non-Marine-Aquatic	OTU-9612
3300017480_43	Non-Marine-Aquatic	OTU-10754
3300024324_25	Marine	OTU-12091
3300024324_24	Marine	OTU-681
3300024324_23	Marine	OTU-2393
3300024324_21	Marine	OTU-6994
3300025347_10	Non-Marine-Aquatic	OTU-10807
3300025347_11	Non-Marine-Aquatic	OTU-10808
3300025347_12	Non-Marine-Aquatic	OTU-10809
3300025347_13	Non-Marine-Aquatic	OTU-10107
3300025347_14	Non-Marine-Aquatic	OTU-10811
3300025347_15	Non-Marine-Aquatic	OTU-10812
3300022743_11	Non-Marine-Aquatic	OTU-13763
3300027780_12	Marine	OTU-7815
3300008743_24	Host-associated	OTU-11893
3300008743_25	Host-associated	OTU-2260
3300008743_22	Host-associated	OTU-341
3300008743_23	Host-associated	OTU-2130
3300014325_10	Host-associated	OTU-6611
3300014653_2	Engineered	OTU-13062
3300027229_6	Marine	OTU-217
3300006317_10	Host-associated	OTU-16251
3300006317_14	Host-associated	OTU-1134
3300006317_15	Host-associated	OTU-7159
3300017533_29	Non-Marine-Aquatic	OTU-11541
3300017533_27	Non-Marine-Aquatic	OTU-11785
3300017533_26	Non-Marine-Aquatic	OTU-11786
3300017533_23	Non-Marine-Aquatic	OTU-11788
3300017533_21	Non-Marine-Aquatic	OTU-16661
3300017533_20	Non-Marine-Aquatic	OTU-16666
3300025861_117	Engineered	OTU-5999
3300005805_61	Non-Marine-Aquatic	OTU-12094
3300005805_66	Non-Marine-Aquatic	OTU-12097
3300025658_34	Marine	OTU-14151
3300017449_25	Non-Marine-Aquatic	OTU-12255
3300017449_21	Non-Marine-Aquatic	OTU-7749
3300017449_23	Non-Marine-Aquatic	OTU-2142
3300017449_22	Non-Marine-Aquatic	OTU-1400
3300012848_12	Host-associated	OTU-14025
3300020311_8	Marine	OTU-12408
3300020311_9	Marine	OTU-4175
3300020311_2	Marine	OTU-9659
3300020311_5	Marine	OTU-4110
3300029494_22	Host-associated	OTU-12449
3300029494_24	Host-associated	OTU-5586
3300029494_26	Host-associated	OTU-5974
3300029494_28	Host-associated	OTU-2977
3300008732_16	Host-associated	OTU-2810
3300008732_14	Host-associated	OTU-7726
3300008732_11	Host-associated	OTU-17413
3300008732_10	Host-associated	OTU-1837
3300021491_5	Non-Marine-Aquatic	OTU-13416
3300006931_17	Host-associated	OTU-12577
3300006931_19	Host-associated	OTU-12581
3300007794_8	Host-associated	OTU-13224
3300007794_6	Host-associated	OTU-2260
3300007794_7	Host-associated	OTU-11208
3300007794_4	Host-associated	OTU-1950
3300007794_5	Host-associated	OTU-2130
3300007794_2	Host-associated	OTU-1134
3300007794_3	Host-associated	OTU-12599
3300025503_8	Non-Marine-Aquatic	OTU-12667
3300025503_4	Non-Marine-Aquatic	OTU-12675
3300025503_6	Non-Marine-Aquatic	OTU-12677
3300025503_7	Non-Marine-Aquatic	OTU-15748
3300011418_10	Host-associated	OTU-3234
3300027700_11	Marine	OTU-12694
3300011418_13	Host-associated	OTU-12695
3300011418_14	Host-associated	OTU-6662
3300027700_16	Marine	OTU-15318
3300011418_16	Host-associated	OTU-12698
3300009095_155	Terrestrial	OTU-8375
3300027789_6	Engineered	OTU-7941
3300027789_7	Engineered	OTU-4278
3300027789_2	Engineered	OTU-12726
3300029075_2	Host-associated	OTU-4322
3300029075_4	Host-associated	OTU-9266
3300028400_21	Non-Marine-Aquatic	OTU-12733
3300028400_22	Non-Marine-Aquatic	OTU-14083
3300020239_6	Marine	OTU-11188
3300027847_101	Marine	OTU-12822
3300027847_106	Marine	OTU-17571
3300010281_19	Engineered	OTU-922
3300025665_39	Marine	OTU-10825
3300025665_35	Marine	OTU-1923
3300025665_34	Marine	OTU-17036
3300025665_31	Marine	OTU-681
3300025665_33	Marine	OTU-16767
3300025665_32	Marine	OTU-12091
3300029781_12	Engineered	OTU-13035
3300029781_10	Engineered	OTU-13037
3300029781_11	Engineered	OTU-11805
3300024186_3	Terrestrial	OTU-6404
3300024186_1	Terrestrial	OTU-6317
3300025321_12	Host-associated	OTU-8209
3300010160_68	Non-Marine-Aquatic	OTU-13162
3300020454_20	Marine	OTU-12684
3300026522_63	Host-associated	OTU-121
3300007316_8	Host-associated	OTU-5482
3300017817_19	Engineered	OTU-13215
3300017817_18	Engineered	OTU-14830
3300017817_13	Engineered	OTU-7533
3300017817_12	Engineered	OTU-13221
3300017817_11	Engineered	OTU-11405
3300017817_17	Engineered	OTU-1340
3300017817_16	Engineered	OTU-4474
3300017817_14	Engineered	OTU-11905
3300018914_10	Terrestrial	OTU-4408
3300012087_4	Host-associated	OTU-6061
3300006914_48	Host-associated	OTU-5534
3300029471_11	Host-associated	OTU-12511
3300029471_14	Host-associated	OTU-9266
3300029471_15	Host-associated	OTU-6928
3300029471_16	Host-associated	OTU-6553
3300029471_17	Host-associated	OTU-17428
3300029471_19	Host-associated	OTU-10265
3300024433_34	Non-Marine-Aquatic	OTU-4091
3300027789_19	Engineered	OTU-6695
3300027789_14	Engineered	OTU-7790
3300027789_15	Engineered	OTU-14028
3300027789_10	Engineered	OTU-15648
3300027789_12	Engineered	OTU-14030
3300021055_1	Terrestrial	OTU-8655
3300000929_12	Non-Marine-Aquatic	OTU-11536
3300000929_16	Non-Marine-Aquatic	OTU-5741
3300027691_3	Terrestrial	OTU-11212
3300028399_30	Non-Marine-Aquatic	OTU-14592
3300028399_33	Non-Marine-Aquatic	OTU-14594
3300028399_36	Non-Marine-Aquatic	OTU-14595
3300020352_5	Marine	OTU-11123
3300020352_4	Marine	OTU-469
3300015196_5	Terrestrial	OTU-17875
3300015196_4	Terrestrial	OTU-15709
3300015196_3	Terrestrial	OTU-2530
3300022888_32	Marine	OTU-17060
3300022888_34	Marine	OTU-1003
3300013137_78	Non-Marine-Aquatic	OTU-13793
3300013137_79	Non-Marine-Aquatic	OTU-14681
3300013137_71	Non-Marine-Aquatic	OTU-5672
3300013137_72	Non-Marine-Aquatic	OTU-14688
3300013137_75	Non-Marine-Aquatic	OTU-14689
3300013137_76	Non-Marine-Aquatic	OTU-6781
3300013137_77	Non-Marine-Aquatic	OTU-9017
3300027198_9	Marine	OTU-14151
3300027198_2	Marine	OTU-1228
3300027198_1	Marine	OTU-10917
3300027198_6	Marine	OTU-12598
3300027198_4	Marine	OTU-6970
3300027198_5	Marine	OTU-14734
3300027793_18	Non-Marine-Aquatic	OTU-14790
3300027793_17	Non-Marine-Aquatic	OTU-14791
3300027793_15	Non-Marine-Aquatic	OTU-4636
3300027793_14	Non-Marine-Aquatic	OTU-14793
3300027793_13	Non-Marine-Aquatic	OTU-5247
3300027793_12	Non-Marine-Aquatic	OTU-5251
3300027793_11	Non-Marine-Aquatic	OTU-13347
3300027793_10	Non-Marine-Aquatic	OTU-6903
3300008709_7	Host-associated	OTU-11446
3300027917_111	Non-Marine-Aquatic	OTU-17218
3300026116_40	Host-associated	OTU-17415
3300011616_3	Engineered	OTU-14897
3300011616_1	Engineered	OTU-14899
3300026116_48	Host-associated	OTU-13066
3300011616_4	Engineered	OTU-13376
3300011616_5	Engineered	OTU-11208
2049941000_33	Host-associated	OTU-4238
2049941000_36	Host-associated	OTU-15006
3300021093_50	Non-Marine-Aquatic	OTU-7829
3300021093_51	Non-Marine-Aquatic	OTU-17626
3300021093_53	Non-Marine-Aquatic	OTU-17785
3300012825_4	Host-associated	OTU-15080
3300025471_18	Engineered	OTU-15129
3300025471_14	Engineered	OTU-11499
3300025471_17	Engineered	OTU-15133
3300025471_10	Engineered	OTU-4174
3300025471_11	Engineered	OTU-15134
3300014206_60	Engineered	OTU-15315
3300014206_63	Engineered	OTU-15316
3300014206_65	Engineered	OTU-516
3300014206_64	Engineered	OTU-13080
3300014206_66	Engineered	OTU-15319
3300014206_69	Engineered	OTU-15320
3300023187_8	Engineered	OTU-15324
3300023187_9	Engineered	OTU-1803
3300023187_6	Engineered	OTU-15333
3300023187_4	Engineered	OTU-15335
3300024300_20	Non-Marine-Aquatic	OTU-14050
3300025409_6	Non-Marine-Aquatic	OTU-3989
3300025409_2	Non-Marine-Aquatic	OTU-2499
3300025409_1	Non-Marine-Aquatic	OTU-2500
3300017458_12	Non-Marine-Aquatic	OTU-15401
3300017458_13	Non-Marine-Aquatic	OTU-15402
3300022225_38	Marine	OTU-544
3300015370_48	Non-Marine-Aquatic	OTU-15473
3300015370_49	Non-Marine-Aquatic	OTU-2673
3300015370_45	Non-Marine-Aquatic	OTU-15477
3300015370_46	Non-Marine-Aquatic	OTU-15478
3300015370_40	Non-Marine-Aquatic	OTU-15480
3300022225_37	Marine	OTU-16108
3300015370_42	Non-Marine-Aquatic	OTU-15482
3300022225_35	Marine	OTU-15483
3300023116_16	Non-Marine-Aquatic	OTU-7837
3300021474_5	Terrestrial	OTU-11474
3300025515_11	Terrestrial	OTU-1265
3300020193_54	Non-Marine-Aquatic	OTU-15246
3300029403_9	Host-associated	OTU-3269
3300013136_86	Non-Marine-Aquatic	OTU-11550
3300013136_82	Non-Marine-Aquatic	OTU-15713
3300013136_83	Non-Marine-Aquatic	OTU-15714
3300013946_5	Host-associated	OTU-8294
3300013946_6	Host-associated	OTU-10265
3300013946_7	Host-associated	OTU-9180
3300013946_3	Host-associated	OTU-15179
3300014109_12	Host-associated	OTU-1837
3300014109_13	Host-associated	OTU-2031
3300014109_14	Host-associated	OTU-340
3300014109_15	Host-associated	OTU-2030
3300014109_16	Host-associated	OTU-15345
3300014109_17	Host-associated	OTU-12046
3300028034_4	Terrestrial	OTU-3889
3300028034_3	Terrestrial	OTU-12886
3300025601_20	Non-Marine-Aquatic	OTU-3313
3300025601_21	Non-Marine-Aquatic	OTU-8415
3300001463_5	Host-associated	OTU-15797
3300029114_8	Host-associated	OTU-15627
3300029114_9	Host-associated	OTU-6831
3300029114_7	Host-associated	OTU-11090
3300009709_46	Host-associated	OTU-15828
3300009709_41	Host-associated	OTU-15830
3300007076_33	Host-associated	OTU-10190
3300029501_11	Host-associated	OTU-8715
3300029501_12	Host-associated	OTU-2910
3300029501_13	Host-associated	OTU-7932
3300029501_14	Host-associated	OTU-4098
3300029501_15	Host-associated	OTU-8479
3300020430_35	Marine	OTU-15893
3300020430_36	Marine	OTU-11188
3300029541_11	Host-associated	OTU-8643
3300029053_8	Host-associated	OTU-6831
3300029053_9	Host-associated	OTU-14336
3300029541_18	Host-associated	OTU-2245
3300029541_19	Host-associated	OTU-13776
3300027510_25	Engineered	OTU-11143
3300027510_24	Engineered	OTU-16098
3300027510_27	Engineered	OTU-16099
3300027510_26	Engineered	OTU-16100
3300027510_20	Engineered	OTU-16101
3300027510_23	Engineered	OTU-16102
3300027510_28	Engineered	OTU-16105
3300020257_1	Marine	OTU-12371
3300022933_19	Marine	OTU-6176
3300008480_44	Host-associated	OTU-2214
3300008480_43	Host-associated	OTU-2795
3300012151_9	Host-associated	OTU-9731
3300012151_8	Host-associated	OTU-9729
3300012151_6	Host-associated	OTU-1473
3300012151_4	Host-associated	OTU-6804
3300029365_15	Host-associated	OTU-16537
3300029365_17	Host-associated	OTU-8068
3300029365_18	Host-associated	OTU-16329
3300029365_19	Host-associated	OTU-14558
3300027273_1	Terrestrial	OTU-13995
3300029608_20	Host-associated	OTU-10726
3300011682_4	Engineered	OTU-1759
3300011682_3	Engineered	OTU-11606
3300020440_37	Marine	OTU-12657
3300020440_36	Marine	OTU-16658
3300020440_33	Marine	OTU-16660
3300020440_31	Marine	OTU-16662
3300020312_11	Marine	OTU-1632
3300020312_16	Marine	OTU-15578
3300003076_1	Non-Marine-Aquatic	OTU-16157
3300006460_23	Host-associated	OTU-1061
3300006460_20	Host-associated	OTU-2030
3300006460_21	Host-associated	OTU-5482
3300006460_27	Host-associated	OTU-7820
3300006460_25	Host-associated	OTU-1376
3300006460_29	Host-associated	OTU-5750
3300008541_7	Host-associated	OTU-9640
3300008541_5	Host-associated	OTU-16739
3300011472_4	Engineered	OTU-4244
3300011472_5	Engineered	OTU-16913
3300011472_2	Engineered	OTU-16921
3300011472_3	Engineered	OTU-13567
3300027499_3	Terrestrial	OTU-17016
3300027499_1	Terrestrial	OTU-3595
3300027499_7	Terrestrial	OTU-17020
3300027499_5	Terrestrial	OTU-17022
3300025112_6	Marine	OTU-1062
3300025112_7	Marine	OTU-9264
3300025112_4	Marine	OTU-6430
3300025112_5	Marine	OTU-15150
3300029736_4	Host-associated	OTU-10641
3300029736_8	Host-associated	OTU-11090
3300009083_186	Non-Marine-Aquatic	OTU-14331
3300009083_187	Non-Marine-Aquatic	OTU-14335
3300026262_35	Marine	OTU-4510
3300026262_30	Marine	OTU-5361
3300019935_2	Non-Marine-Aquatic	OTU-1915
3300019935_3	Non-Marine-Aquatic	OTU-17416
3300022826_4	Non-Marine-Aquatic	OTU-12304
3300022895_7	Terrestrial	OTU-9915
3300022895_6	Terrestrial	OTU-11789
3300022895_9	Terrestrial	OTU-8396
3300022895_8	Terrestrial	OTU-9908
3300005529_34	Terrestrial	OTU-17466
3300005529_35	Terrestrial	OTU-14719
3300005529_32	Terrestrial	OTU-17468
3300005529_33	Terrestrial	OTU-17469
3300029422_21	Host-associated	OTU-10265
3300029422_20	Host-associated	OTU-17534
3300029422_23	Host-associated	OTU-14336
3300029422_22	Host-associated	OTU-3559
3300018026_9	Non-Marine-Aquatic	OTU-4465
3300021587_2	Non-Marine-Aquatic	OTU-13416
3300029900_9	Non-Marine-Aquatic	OTU-4128
3300029208_21	Host-associated	OTU-7775
3300029208_20	Host-associated	OTU-3242
3300009702_168	Non-Marine-Aquatic	OTU-17799
3300029232_22	Host-associated	OTU-6914
3300029232_20	Host-associated	OTU-7647
3300029232_21	Host-associated	OTU-7775
3300008012_29	Marine	OTU-718
3300008012_20	Marine	OTU-17852
3300025699_11	Marine	OTU-7869
3300025699_14	Marine	OTU-2723
3300025699_17	Marine	OTU-8764
3300025699_19	Marine	OTU-8206
3300029822_18	Engineered	OTU-4955
3300029822_19	Engineered	OTU-23
3300029822_14	Engineered	OTU-26
3300029822_17	Engineered	OTU-117
3300029822_11	Engineered	OTU-29
3300029822_12	Engineered	OTU-4960
3300029822_13	Engineered	OTU-127
3300017434_49	Non-Marine-Aquatic	OTU-15022
3300027649_23	Non-Marine-Aquatic	OTU-16292
3300011634_3	Engineered	OTU-13062
3300013125_46	Non-Marine-Aquatic	OTU-8862
3300013125_47	Non-Marine-Aquatic	OTU-315
3300013125_44	Non-Marine-Aquatic	OTU-9999
3300013125_40	Non-Marine-Aquatic	OTU-319
3300013125_48	Non-Marine-Aquatic	OTU-5311
3300025261_22	Host-associated	OTU-9053
3300021425_11	Marine	OTU-9057
3300010409_5	Host-associated	OTU-175
3300020400_7	Marine	OTU-532
3300007499_3	Host-associated	OTU-11208
3300027640_18	Terrestrial	OTU-556
3300008490_63	Host-associated	OTU-9533
3300029135_18	Host-associated	OTU-2849
3300029135_17	Host-associated	OTU-6831
3300025740_51	Engineered	OTU-14894
3300025740_53	Engineered	OTU-9039
3300025740_52	Engineered	OTU-9629
3300025740_57	Engineered	OTU-18006
3300007138_8	Host-associated	OTU-6831
3300007138_9	Host-associated	OTU-2478
3300007138_2	Host-associated	OTU-1996
3300007138_3	Host-associated	OTU-8646
3300007138_7	Host-associated	OTU-15179
3300020390_13	Marine	OTU-8722
3300020390_12	Marine	OTU-16876
3300017419_42	Non-Marine-Aquatic	OTU-13210
3300017419_43	Non-Marine-Aquatic	OTU-13229
3300017419_40	Non-Marine-Aquatic	OTU-13246
3300018024_17	Non-Marine-Aquatic	OTU-17344
3300025620_23	Marine	OTU-6132
3300025620_22	Marine	OTU-13041
3300003281_5	Engineered	OTU-6912
3300003281_6	Engineered	OTU-1069
3300003281_9	Engineered	OTU-1073
3300003281_8	Engineered	OTU-6960
3300001567_19	Engineered	OTU-11090
3300011717_6	Engineered	OTU-1442
3300011717_4	Engineered	OTU-7450
3300011717_2	Engineered	OTU-4915
3300011717_3	Engineered	OTU-1759
3300011717_1	Engineered	OTU-17423
3300025265_12	Marine	OTU-4510
3300013751_17	Host-associated	OTU-2260
3300029497_6	Host-associated	OTU-13776
3300029497_5	Host-associated	OTU-10131
3300013751_11	Host-associated	OTU-17157
3300008341_4	Host-associated	OTU-2130
3300008341_3	Host-associated	OTU-9640
3300008341_2	Host-associated	OTU-6459
3300027835_102	Non-Marine-Aquatic	OTU-3241
3300029592_28	Host-associated	OTU-1857
3300029592_21	Host-associated	OTU-10259
3300029592_22	Host-associated	OTU-2155
3300000425_15	Non-Marine-Aquatic	OTU-10702
3300000425_12	Non-Marine-Aquatic	OTU-10704
3300025347_8	Non-Marine-Aquatic	OTU-1676
3300025347_2	Non-Marine-Aquatic	OTU-1681
3300025347_3	Non-Marine-Aquatic	OTU-1682
3300025347_1	Non-Marine-Aquatic	OTU-4347
3300025347_6	Non-Marine-Aquatic	OTU-1683
3300025347_7	Non-Marine-Aquatic	OTU-10494
3300025347_4	Non-Marine-Aquatic	OTU-1685
3300025347_5	Non-Marine-Aquatic	OTU-10496
3300025296_12	Marine	OTU-3144
3300013308_50	Host-associated	OTU-10190
3300005966_8	Non-Marine-Aquatic	OTU-3929
3300005966_7	Non-Marine-Aquatic	OTU-10817
3300005966_6	Non-Marine-Aquatic	OTU-15664
3300005966_1	Non-Marine-Aquatic	OTU-1853
3300005966_3	Non-Marine-Aquatic	OTU-15252
3300005966_2	Non-Marine-Aquatic	OTU-10534
3300004269_2	Non-Marine-Aquatic	OTU-1921
3300021341_19	Marine	OTU-16583
3300029860_30	Host-associated	OTU-6831
3300029860_31	Host-associated	OTU-13896
3300029860_32	Host-associated	OTU-3273
3300029860_38	Host-associated	OTU-16228
3300029633_11	Host-associated	OTU-3559
3300029633_14	Host-associated	OTU-4365
3300014566_7	Host-associated	OTU-7206
3300014566_6	Host-associated	OTU-7875
3300014566_5	Host-associated	OTU-3269
3300014566_8	Host-associated	OTU-6928
3300000222_5	Marine	OTU-15506
3300012889_4	Engineered	OTU-9378
3300011386_4	Engineered	OTU-7450
3300011386_1	Engineered	OTU-1080
3300011386_2	Engineered	OTU-2457
3300011386_3	Engineered	OTU-15144
3300006349_1	Host-associated	OTU-1996
3300006349_7	Host-associated	OTU-10186
3300006349_4	Host-associated	OTU-12997
3300010035_6	Host-associated	OTU-2602
3300022836_5	Non-Marine-Aquatic	OTU-15467
3300022377_12	Host-associated	OTU-14660
3300013122_10	Non-Marine-Aquatic	OTU-2790
3300013122_11	Non-Marine-Aquatic	OTU-10000
3300013122_12	Non-Marine-Aquatic	OTU-17858
3300013122_13	Non-Marine-Aquatic	OTU-2792
3300013122_14	Non-Marine-Aquatic	OTU-2793
3300013122_16	Non-Marine-Aquatic	OTU-9787
3300029491_16	Host-associated	OTU-7970
3300013122_19	Non-Marine-Aquatic	OTU-133
3300029491_14	Host-associated	OTU-9424
3300029491_15	Host-associated	OTU-9180
3300029491_12	Host-associated	OTU-15671
3300029491_13	Host-associated	OTU-8929
3300029491_10	Host-associated	OTU-13776
3300029491_11	Host-associated	OTU-2910
3300014043_11	Host-associated	OTU-2839
3300029595_9	Host-associated	OTU-1996
3300014497_10	Host-associated	OTU-2937
3300014497_12	Host-associated	OTU-2939
3300005262_20	Host-associated	OTU-3026
3300026252_8	Engineered	OTU-2604
3300026252_4	Engineered	OTU-7551
3300026252_5	Engineered	OTU-15776
3300026252_3	Engineered	OTU-3082
3300025403_10	Non-Marine-Aquatic	OTU-3134
3300025444_8	Non-Marine-Aquatic	OTU-8454
3300025444_9	Non-Marine-Aquatic	OTU-6169
3300025444_6	Non-Marine-Aquatic	OTU-4010
3300023238_12	Non-Marine-Aquatic	OTU-14135
3300011805_4	Engineered	OTU-4901
3300011805_1	Engineered	OTU-13295
3300011805_2	Engineered	OTU-845
3300011805_3	Engineered	OTU-3390
3300029229_5	Host-associated	OTU-9606
3300025230_23	Host-associated	OTU-4721
3300010273_31	Engineered	OTU-842
3300020411_47	Marine	OTU-15578
3300008635_23	Host-associated	OTU-13876
3300020222_96	Non-Marine-Aquatic	OTU-15246
3300026136_3	Marine	OTU-16448
3300020222_90	Non-Marine-Aquatic	OTU-3495
3300020222_98	Non-Marine-Aquatic	OTU-3092
3300012820_5	Host-associated	OTU-9889
3300027703_5	Terrestrial	OTU-10663
3300027703_6	Terrestrial	OTU-11608
3300001598_21	Host-associated	OTU-3599
3300001598_28	Host-associated	OTU-3606
3300005326_70	Engineered	OTU-3642
3300005326_75	Engineered	OTU-3182
3300005326_76	Engineered	OTU-3646
3300005326_79	Engineered	OTU-3647
3300005326_78	Engineered	OTU-3648
3300025890_18	Marine	OTU-9592
3300006195_16	Host-associated	OTU-2520
3300006195_11	Host-associated	OTU-9085
3300006195_19	Host-associated	OTU-3718
3300011485_1	Engineered	OTU-1555
3300011485_2	Engineered	OTU-16484
3300011485_3	Engineered	OTU-3768
3300014665_6	Engineered	OTU-8156
3300014665_5	Engineered	OTU-7450
3300011996_11	Terrestrial	OTU-6811
3300024040_9	Host-associated	OTU-2665
3300011564_3	Engineered	OTU-4915
3300020200_26	Non-Marine-Aquatic	OTU-9514
3300020200_24	Non-Marine-Aquatic	OTU-4123
3300029515_7	Host-associated	OTU-640
3300029766_18	Host-associated	OTU-7680
3300027784_129	Non-Marine-Aquatic	OTU-3000
3300025396_3	Non-Marine-Aquatic	OTU-4436
3300025396_4	Non-Marine-Aquatic	OTU-13802
3300025396_7	Non-Marine-Aquatic	OTU-14842
3300025396_8	Non-Marine-Aquatic	OTU-4230
3300029365_8	Host-associated	OTU-7748
3300026197_8	Terrestrial	OTU-13930
3300011786_1	Engineered	OTU-4915
3300011786_2	Engineered	OTU-14174
3300011786_4	Engineered	OTU-13563
3300012887_3	Host-associated	OTU-4827
3300012887_6	Host-associated	OTU-4832
3300025661_33	Non-Marine-Aquatic	OTU-5000
3300024912_2	Non-Marine-Aquatic	OTU-12858
3300029503_8	Host-associated	OTU-16537
3300029503_7	Host-associated	OTU-10641
3300029588_7	Host-associated	OTU-16537
3300026620_2	Terrestrial	OTU-2873
3300026620_1	Terrestrial	OTU-12173
3300015193_2	Terrestrial	OTU-14974
3300009381_8	Host-associated	OTU-9640
3300009381_9	Host-associated	OTU-14168
3300009381_6	Host-associated	OTU-5034
3300009381_7	Host-associated	OTU-14172
3300009381_4	Host-associated	OTU-6541
3300009381_5	Host-associated	OTU-12318
3300026549_85	Host-associated	OTU-15131
3300026549_80	Host-associated	OTU-5460
3300026549_81	Host-associated	OTU-15145
3300026549_83	Host-associated	OTU-5463
3300027728_51	Non-Marine-Aquatic	OTU-17250
3300025913_45	Host-associated	OTU-15205
3300025913_46	Host-associated	OTU-17707
3300025913_49	Host-associated	OTU-5477
3300026509_28	Non-Marine-Aquatic	OTU-5540
3300026509_22	Non-Marine-Aquatic	OTU-14379
3300026509_23	Non-Marine-Aquatic	OTU-6261
3300026509_20	Non-Marine-Aquatic	OTU-5545
3300026509_27	Non-Marine-Aquatic	OTU-6259
3300026509_24	Non-Marine-Aquatic	OTU-15611
3300026509_25	Non-Marine-Aquatic	OTU-6617
3300012556_1	Host-associated	OTU-5257
3300026157_19	Terrestrial	OTU-9953
3300029428_9	Host-associated	OTU-15901
3300028189_15	Marine	OTU-2393
3300013093_26	Non-Marine-Aquatic	OTU-2278
3300013093_27	Non-Marine-Aquatic	OTU-5818
3300013093_24	Non-Marine-Aquatic	OTU-11674
3300013093_25	Non-Marine-Aquatic	OTU-17243
3300013093_22	Non-Marine-Aquatic	OTU-15987
3300013093_23	Non-Marine-Aquatic	OTU-11669
3300013093_20	Non-Marine-Aquatic	OTU-2277
3300013093_28	Non-Marine-Aquatic	OTU-13657
3300013093_29	Non-Marine-Aquatic	OTU-18021
3300008520_5	Host-associated	OTU-7748
3300008520_3	Host-associated	OTU-10700
3300020692_4	Non-Marine-Aquatic	OTU-479
3300020692_2	Non-Marine-Aquatic	OTU-15909
3300020692_3	Non-Marine-Aquatic	OTU-7715
3300029886_5	Host-associated	OTU-16537
3300015075_2	Terrestrial	OTU-10030
3300029886_8	Host-associated	OTU-2478
3300029886_9	Host-associated	OTU-6831
3300025651_4	Engineered	OTU-11403
3300025651_3	Engineered	OTU-6123
3300027218_1	Marine	OTU-6970
3300027218_3	Marine	OTU-12598
3300027218_2	Marine	OTU-217
3300012156_9	Host-associated	OTU-2578
3300014615_1	Engineered	OTU-1759
3300025260_6	Marine	OTU-14799
3300025260_7	Marine	OTU-4821
3300025260_4	Marine	OTU-11384
3300025260_3	Marine	OTU-16640
3300025260_9	Marine	OTU-2814
3300026847_1	Terrestrial	OTU-11608
3300008141_8	Host-associated	OTU-5482
3300029406_4	Host-associated	OTU-4372
3300029406_5	Host-associated	OTU-9512
3300029406_6	Host-associated	OTU-2478
3300029406_7	Host-associated	OTU-8643
3300028191_19	Non-Marine-Aquatic	OTU-15730
3300028191_10	Non-Marine-Aquatic	OTU-6509
3300028191_12	Non-Marine-Aquatic	OTU-7484
3300028191_15	Non-Marine-Aquatic	OTU-6513
3300028980_2	Host-associated	OTU-11090
3300028980_3	Host-associated	OTU-16537
3300028980_4	Host-associated	OTU-9570
3300028980_5	Host-associated	OTU-11606
3300008406_22	Host-associated	OTU-7764
3300008406_23	Host-associated	OTU-3690
3300008406_27	Host-associated	OTU-14109
3300014830_4	Engineered	OTU-11237
3300014830_3	Engineered	OTU-6785
3300026205_2	Marine	OTU-2458
3300026205_9	Marine	OTU-1358
3300029050_7	Host-associated	OTU-8643
3300029050_9	Host-associated	OTU-15627
3300027725_6	Terrestrial	OTU-17630
3300027757_19	Marine	OTU-12598
3300027757_17	Marine	OTU-6132
3300027757_14	Marine	OTU-14734
3300027757_11	Marine	OTU-13131
3300025705_40	Marine	OTU-8769
3300025705_42	Marine	OTU-681
3300025705_47	Marine	OTU-14151
3300025705_46	Marine	OTU-3499
3300029257_12	Host-associated	OTU-15179
3300029257_13	Host-associated	OTU-13648
3300025684_45	Marine	OTU-14151
3300027744_50	Non-Marine-Aquatic	OTU-7153
3300029738_23	Host-associated	OTU-1590
3300029738_21	Host-associated	OTU-4559
3300029738_20	Host-associated	OTU-11888
3300029738_27	Host-associated	OTU-15865
3300029738_26	Host-associated	OTU-12746
3300010282_58	Host-associated	OTU-5399
3300010282_59	Host-associated	OTU-491
3300007714_7	Host-associated	OTU-16500
3300007714_2	Host-associated	OTU-16537
3300007714_3	Host-associated	OTU-2556
3300029338_9	Host-associated	OTU-14459
3300011582_2	Engineered	OTU-7394
3300011582_3	Engineered	OTU-8044
3300011582_1	Engineered	OTU-1080
3300022227_66	Marine	OTU-17384
3300022227_62	Marine	OTU-7422
3300007316_16	Host-associated	OTU-5243
3300007316_17	Host-associated	OTU-7806
3300007316_15	Host-associated	OTU-8087
3300007316_13	Host-associated	OTU-7770
3300007316_10	Host-associated	OTU-340
3300007316_11	Host-associated	OTU-7764
3300007316_18	Host-associated	OTU-11791
3300007316_19	Host-associated	OTU-14109
3300029131_30	Host-associated	OTU-4620
3300025245_6	Host-associated	OTU-9240
3300025245_9	Host-associated	OTU-9239
3300006739_5	Host-associated	OTU-10555
3300013138_39	Non-Marine-Aquatic	OTU-8108
3300013138_35	Non-Marine-Aquatic	OTU-13385
3300013138_37	Non-Marine-Aquatic	OTU-9475
3300013138_36	Non-Marine-Aquatic	OTU-13389
3300013138_33	Non-Marine-Aquatic	OTU-8116
3300013138_32	Non-Marine-Aquatic	OTU-8862
3300022823_5	Host-associated	OTU-16204
3300002164_76	Engineered	OTU-13899
3300029758_27	Host-associated	OTU-6914
3300029758_20	Host-associated	OTU-3242
3300000062_48	Host-associated	OTU-16320
3300000062_40	Host-associated	OTU-8710
3300000062_44	Host-associated	OTU-8711
3300000062_46	Host-associated	OTU-8712
3300005983_14	Host-associated	OTU-8723
3300005983_16	Host-associated	OTU-16437
3300010373_21	Terrestrial	OTU-12
3300006329_5	Marine	OTU-3043
3300012295_1	Host-associated	OTU-5257
3300029557_13	Host-associated	OTU-14739
3300029557_10	Host-associated	OTU-3269
3300029557_17	Host-associated	OTU-12878
3300029557_16	Host-associated	OTU-9180
3300012268_10	Non-Marine-Aquatic	OTU-4485
3300029557_19	Host-associated	OTU-12522
3300025882_45	Engineered	OTU-8819
3300025882_47	Engineered	OTU-13243
3300027917_119	Non-Marine-Aquatic	OTU-8849
3300008334_5	Host-associated	OTU-9640
3300008334_7	Host-associated	OTU-2260
3300008334_6	Host-associated	OTU-10340
3300008334_3	Host-associated	OTU-6690
3300008334_9	Host-associated	OTU-10242
3300022925_13	Non-Marine-Aquatic	OTU-11133
3300025762_89	Engineered	OTU-16626
3300029571_8	Host-associated	OTU-16537
3300011637_4	Engineered	OTU-6507
3300011637_3	Engineered	OTU-16348
3300011637_2	Engineered	OTU-14330
3300008125_24	Host-associated	OTU-4126
3300008125_25	Host-associated	OTU-5243
3300028570_79	Engineered	OTU-10381
3300028570_73	Engineered	OTU-17068
3300028570_71	Engineered	OTU-8395
3300028570_70	Engineered	OTU-14436
3300028570_75	Engineered	OTU-15378
3300028570_74	Engineered	OTU-10759
3300013128_97	Non-Marine-Aquatic	OTU-9171
3300025720_30	Engineered	OTU-3684
3300025720_33	Engineered	OTU-7934
3300025720_35	Engineered	OTU-16567
3300025720_34	Engineered	OTU-15956
3300025720_37	Engineered	OTU-9253
3300025720_36	Engineered	OTU-9254
3300025720_39	Engineered	OTU-17101
3300020053_13	Non-Marine-Aquatic	OTU-9299
3300023179_55	Non-Marine-Aquatic	OTU-9354
3300023179_54	Non-Marine-Aquatic	OTU-9355
3300011738_5	Terrestrial	OTU-3266
3300011738_4	Terrestrial	OTU-3261
3300011738_3	Terrestrial	OTU-3262
3300011738_2	Terrestrial	OTU-3266
3300011738_1	Terrestrial	OTU-3267
3300028644_24	Engineered	OTU-3294
3300014002_2	Engineered	OTU-275
3300014002_3	Engineered	OTU-17309
3300029749_29	Host-associated	OTU-16228
3300029749_28	Host-associated	OTU-13479
3300029749_27	Host-associated	OTU-18020
3300029749_24	Host-associated	OTU-364
3300029749_23	Host-associated	OTU-6831
3300029749_22	Host-associated	OTU-5574
3300020180_33	Non-Marine-Aquatic	OTU-5609
3300020180_34	Non-Marine-Aquatic	OTU-16761
3300020180_35	Non-Marine-Aquatic	OTU-17602
3300020180_36	Non-Marine-Aquatic	OTU-6483
3300025924_18	Host-associated	OTU-12269
3300025161_39	Non-Marine-Aquatic	OTU-9551
3300025161_34	Non-Marine-Aquatic	OTU-9553
3300025161_35	Non-Marine-Aquatic	OTU-9554
3300025161_36	Non-Marine-Aquatic	OTU-5119
3300025161_30	Non-Marine-Aquatic	OTU-9557
3300025161_32	Non-Marine-Aquatic	OTU-9559
3300018427_64	Host-associated	OTU-4157
3300014528_6	Host-associated	OTU-13805
3300014528_3	Host-associated	OTU-4197
3300013138_179	Non-Marine-Aquatic	OTU-9619
3300013138_173	Non-Marine-Aquatic	OTU-9627
3300013138_172	Non-Marine-Aquatic	OTU-5054
3300027026_2	Engineered	OTU-9881
3300027026_3	Engineered	OTU-9632
3300027026_4	Engineered	OTU-9880
3300027026_6	Engineered	OTU-9635
3300027026_8	Engineered	OTU-5238
3300027026_9	Engineered	OTU-9882
3300011903_3	Engineered	OTU-16614
3300025664_15	Terrestrial	OTU-9709
3300025664_16	Terrestrial	OTU-9710
3300025664_17	Terrestrial	OTU-4627
3300027301_8	Non-Marine-Aquatic	OTU-7558
3300027301_3	Non-Marine-Aquatic	OTU-8287
3300027301_6	Non-Marine-Aquatic	OTU-685
3300027301_4	Non-Marine-Aquatic	OTU-16769
3300027301_5	Non-Marine-Aquatic	OTU-9846
3300026885_8	Non-Marine-Aquatic	OTU-2343
3300026885_9	Non-Marine-Aquatic	OTU-6307
3300026885_2	Non-Marine-Aquatic	OTU-2345
3300026885_3	Non-Marine-Aquatic	OTU-2707
3300026885_6	Non-Marine-Aquatic	OTU-12470
3300026885_7	Non-Marine-Aquatic	OTU-11042
3300026885_4	Non-Marine-Aquatic	OTU-2344
3300029468_7	Host-associated	OTU-13776
3300012940_19	Terrestrial	OTU-9885
3300007141_3	Host-associated	OTU-9932
3300007141_4	Host-associated	OTU-9935
3300007141_5	Host-associated	OTU-9936
3300025628_3	Non-Marine-Aquatic	OTU-3627
3300021426_80	Host-associated	OTU-16688
3300027747_41	Non-Marine-Aquatic	OTU-17026
3300027747_43	Non-Marine-Aquatic	OTU-8095
2199352004_4	Non-Marine-Aquatic	OTU-14301
3300012016_11	Host-associated	OTU-9012
3300007977_2	Host-associated	OTU-128
3300012016_14	Host-associated	OTU-10695
3300012457_1	Host-associated	OTU-5257
3300013753_8	Host-associated	OTU-8994
3300013753_7	Host-associated	OTU-1077
3300025503_14	Non-Marine-Aquatic	OTU-15868
3300025503_15	Non-Marine-Aquatic	OTU-4674
3300025503_18	Non-Marine-Aquatic	OTU-4677
3300019360_17	Terrestrial	OTU-4405
3300029021_12	Host-associated	OTU-6831
3300029021_15	Host-associated	OTU-10539
3300029021_14	Host-associated	OTU-14336
3300029021_16	Host-associated	OTU-4620
3300013199_1	Host-associated	OTU-12009
3300013199_2	Host-associated	OTU-12008
3300013199_3	Host-associated	OTU-12010
3300029607_19	Host-associated	OTU-12878
3300029607_18	Host-associated	OTU-2245
3300029607_11	Host-associated	OTU-6831
3300029607_17	Host-associated	OTU-8558
3300029607_16	Host-associated	OTU-13081
3300029607_15	Host-associated	OTU-2849
3300005963_2	Non-Marine-Aquatic	OTU-10833
3300005963_3	Non-Marine-Aquatic	OTU-10817
3300005963_7	Non-Marine-Aquatic	OTU-749
3300029060_4	Host-associated	OTU-14459
3300029060_6	Host-associated	OTU-8643
3300029060_9	Host-associated	OTU-2849
3300029220_14	Host-associated	OTU-3242
3300029220_17	Host-associated	OTU-6928
3300029220_12	Host-associated	OTU-6831
3300029220_13	Host-associated	OTU-7210
3300029220_18	Host-associated	OTU-6559
3300012270_6	Non-Marine-Aquatic	OTU-8189
3300021561_34	Engineered	OTU-11170
3300021561_36	Engineered	OTU-11171
3300021561_37	Engineered	OTU-5195
3300021561_30	Engineered	OTU-11172
3300021561_32	Engineered	OTU-11174
3300021561_33	Engineered	OTU-5192
3300021561_38	Engineered	OTU-15223
3300008628_6	Host-associated	OTU-10766
3300008628_5	Host-associated	OTU-340
3300008628_4	Host-associated	OTU-17343
3300020193_41	Non-Marine-Aquatic	OTU-11301
3300020193_40	Non-Marine-Aquatic	OTU-13669
3300020193_42	Non-Marine-Aquatic	OTU-10321
3300020193_44	Non-Marine-Aquatic	OTU-14736
3300020193_46	Non-Marine-Aquatic	OTU-8179
3300025523_1	Engineered	OTU-11403
3300000215_28	Marine	OTU-3879
3300000215_21	Marine	OTU-15146
3300006852_33	Host-associated	OTU-13092
3300026970_9	Engineered	OTU-10040
3300026970_5	Engineered	OTU-4877
3300006491_1	Host-associated	OTU-5257
3300020478_31	Marine	OTU-12992
3300007638_9	Host-associated	OTU-1134
3300010373_93	Terrestrial	OTU-3845
3300027835_113	Non-Marine-Aquatic	OTU-11976
3300008101_41	Host-associated	OTU-4396
3300018475_168	Host-associated	OTU-7679
3300018475_162	Host-associated	OTU-4743
3300018475_165	Host-associated	OTU-6491
3300010273_21	Engineered	OTU-12273
3300010273_20	Engineered	OTU-10203
3300010273_23	Engineered	OTU-11148
3300010273_22	Engineered	OTU-5327
3300010273_25	Engineered	OTU-14132
3300010273_24	Engineered	OTU-9584
3300010273_27	Engineered	OTU-16132
3300010273_29	Engineered	OTU-3808
3300010273_28	Engineered	OTU-4323
3300012829_13	Host-associated	OTU-4652
3300012829_11	Host-associated	OTU-12561
3300012829_10	Host-associated	OTU-9911
3300012829_15	Host-associated	OTU-12012
3300012829_14	Host-associated	OTU-12498
3300008304_5	Host-associated	OTU-16280
3300008304_7	Host-associated	OTU-2130
3300008304_1	Host-associated	OTU-9640
3300014697_3	Engineered	OTU-6820
3300008304_9	Host-associated	OTU-10329
3300013122_5	Non-Marine-Aquatic	OTU-4121
3300006523_9	Host-associated	OTU-2478
3300006523_8	Host-associated	OTU-8643
3300006523_5	Host-associated	OTU-7748
3300006523_4	Host-associated	OTU-17151
3300006523_1	Host-associated	OTU-16670
3300006523_3	Host-associated	OTU-16537
3300028198_9	Marine	OTU-6176
3300027607_16	Marine	OTU-11209
3300027607_18	Marine	OTU-11214
3300012812_5	Host-associated	OTU-4160
3300012812_4	Host-associated	OTU-14439
3300012812_7	Host-associated	OTU-16327
3300012812_6	Host-associated	OTU-13172
3300012812_1	Host-associated	OTU-13173
3300012812_8	Host-associated	OTU-14478
3300014055_7	Engineered	OTU-12594
3300014055_3	Engineered	OTU-16188
3300018427_70	Host-associated	OTU-7679
3300007100_19	Host-associated	OTU-7804
3300007100_18	Host-associated	OTU-6690
3300007100_13	Host-associated	OTU-11208
3300007100_10	Host-associated	OTU-13273
3300007100_17	Host-associated	OTU-7782
3300007100_15	Host-associated	OTU-10340
3300028557_55	Non-Marine-Aquatic	OTU-17250
3300015360_136	Non-Marine-Aquatic	OTU-11242
3300027566_83	Engineered	OTU-8578
3300029858_20	Host-associated	OTU-4538
3300018430_59	Host-associated	OTU-17254
3300008073_3	Host-associated	OTU-971
3300008073_5	Host-associated	OTU-8637
3300008073_8	Host-associated	OTU-2130
3300029483_14	Host-associated	OTU-6831
3300029483_17	Host-associated	OTU-6928
3300029483_16	Host-associated	OTU-703
3300029483_10	Host-associated	OTU-14982
3300029483_13	Host-associated	OTU-13081
3300029483_12	Host-associated	OTU-15627
3300029483_19	Host-associated	OTU-12522
3300029483_18	Host-associated	OTU-7210
3300026293_3	Non-Marine-Aquatic	OTU-17831
3300026293_2	Non-Marine-Aquatic	OTU-13644
3300026293_5	Non-Marine-Aquatic	OTU-15757
3300026293_4	Non-Marine-Aquatic	OTU-17760
3300026293_6	Non-Marine-Aquatic	OTU-15923
3300026293_8	Non-Marine-Aquatic	OTU-13649
3300025623_35	Marine	OTU-8107
3300024353_39	Non-Marine-Aquatic	OTU-5228
3300011776_1	Engineered	OTU-12773
3300011776_3	Engineered	OTU-14174
3300011776_2	Engineered	OTU-13604
3300011776_4	Engineered	OTU-13559
3300029794_32	Host-associated	OTU-7210
3300027349_6	Engineered	OTU-9320
3300027349_5	Engineered	OTU-1544
3300018008_14	Non-Marine-Aquatic	OTU-17754
3300018008_10	Non-Marine-Aquatic	OTU-8454
3300018008_11	Non-Marine-Aquatic	OTU-12767
3300018008_13	Non-Marine-Aquatic	OTU-17599
3300015203_6	Terrestrial	OTU-13955
3300015203_7	Terrestrial	OTU-6748
3300027810_12	Marine	OTU-2230
3300006299_8	Host-associated	OTU-15179
3300006299_7	Host-associated	OTU-1996
3300006299_2	Host-associated	OTU-17151
3300027612_6	Marine	OTU-16363
3300027612_4	Marine	OTU-1381
3300027612_3	Marine	OTU-10436
3300027612_2	Marine	OTU-14244
3300027612_1	Marine	OTU-14245
3300027612_8	Marine	OTU-13537
3300013498_4	Engineered	OTU-14174
3300013498_5	Engineered	OTU-12481
3300025069_1	Marine	OTU-8707
3300025069_3	Marine	OTU-10221
3300025069_2	Marine	OTU-15040
3300026966_6	Engineered	OTU-14556
3300026966_7	Engineered	OTU-14557
3300026966_4	Engineered	OTU-15300
3300026966_3	Engineered	OTU-14560
3300026966_8	Engineered	OTU-10040
3300026966_9	Engineered	OTU-10041
3300011471_1	Engineered	OTU-9830
3300011471_3	Engineered	OTU-5530
3300018030_18	Non-Marine-Aquatic	OTU-16144
3300018030_14	Non-Marine-Aquatic	OTU-6007
3300012008_6	Terrestrial	OTU-14684
3300012008_8	Terrestrial	OTU-14686
3300025541_7	Engineered	OTU-8246
3300025541_4	Engineered	OTU-11403
3300025541_9	Engineered	OTU-14696
3300007980_11	Host-associated	OTU-1379
3300007980_17	Host-associated	OTU-2310
3300007980_14	Host-associated	OTU-14172
3300020214_44	Non-Marine-Aquatic	OTU-3095
3300020214_41	Non-Marine-Aquatic	OTU-17465
3300025520_18	Terrestrial	OTU-16305
3300020214_42	Non-Marine-Aquatic	OTU-716
3300025520_15	Terrestrial	OTU-14908
3300025520_17	Terrestrial	OTU-7315
3300020214_49	Non-Marine-Aquatic	OTU-14911
3300025520_10	Terrestrial	OTU-14912
3300027359_1	Engineered	OTU-12980
3300025373_32	Non-Marine-Aquatic	OTU-15664
3300008571_41	Host-associated	OTU-3273
3300008725_13	Host-associated	OTU-10659
3300008725_12	Host-associated	OTU-15346
3300008725_10	Host-associated	OTU-15179
3300008725_17	Host-associated	OTU-3269
3300008725_15	Host-associated	OTU-7970
3300008725_14	Host-associated	OTU-6928
3300008725_19	Host-associated	OTU-8924
3300017987_38	Non-Marine-Aquatic	OTU-5471
3300011960_1	Engineered	OTU-17670
3300014196_10	Host-associated	OTU-15345
3300014196_12	Host-associated	OTU-2031
3300014196_14	Host-associated	OTU-2030
3300020178_29	Non-Marine-Aquatic	OTU-6051
3300011914_9	Host-associated	OTU-2260
3300011914_8	Host-associated	OTU-15374
3300011914_7	Host-associated	OTU-2130
3300011914_6	Host-associated	OTU-11208
3300011914_5	Host-associated	OTU-15377
3300011914_4	Host-associated	OTU-2086
3300011914_3	Host-associated	OTU-8371
3300007222_30	Host-associated	OTU-11257
3300007222_31	Host-associated	OTU-6928
3300007222_33	Host-associated	OTU-7204
3300007222_34	Host-associated	OTU-9180
3300007222_38	Host-associated	OTU-15383
3300007222_39	Host-associated	OTU-3273
3300029441_26	Host-associated	OTU-4600
3300029441_24	Host-associated	OTU-11350
3300029441_23	Host-associated	OTU-4620
3300029441_21	Host-associated	OTU-16633
3300029441_28	Host-associated	OTU-13081
3300029441_29	Host-associated	OTU-15412
3300007295_8	Host-associated	OTU-11066
3300025861_39	Engineered	OTU-15546
3300017960_34	Non-Marine-Aquatic	OTU-15581
3300017960_39	Non-Marine-Aquatic	OTU-2652
3300027323_70	Non-Marine-Aquatic	OTU-15672
3300006174_3	Non-Marine-Aquatic	OTU-15069
3300006174_6	Non-Marine-Aquatic	OTU-3912
3300027878_37	Non-Marine-Aquatic	OTU-5561
3300027878_33	Non-Marine-Aquatic	OTU-15742
3300027878_32	Non-Marine-Aquatic	OTU-5565
3300027878_38	Non-Marine-Aquatic	OTU-1684
3300026549_76	Host-associated	OTU-2785
3300025571_45	Engineered	OTU-5853
3300025571_46	Engineered	OTU-4537
3300009083_43	Non-Marine-Aquatic	OTU-1684
3300006226_129	Host-associated	OTU-15886
3300006226_121	Host-associated	OTU-9119
3300013884_7	Engineered	OTU-14359
3300013884_6	Engineered	OTU-15969
3300012808_10	Terrestrial	OTU-16327
3300013884_4	Engineered	OTU-15971
3300013884_3	Engineered	OTU-15972
3300013884_2	Engineered	OTU-17968
3300013884_9	Engineered	OTU-13451
3300013884_8	Engineered	OTU-2334
3300027823_30	Non-Marine-Aquatic	OTU-16000
3300027900_75	Non-Marine-Aquatic	OTU-11683
3300007125_27	Host-associated	OTU-15720
3300011969_1	Terrestrial	OTU-13486
3300011969_4	Terrestrial	OTU-17724
3300011581_5	Engineered	OTU-6820
3300011581_4	Engineered	OTU-5902
3300011508_1	Engineered	OTU-16921
3300011508_2	Engineered	OTU-17858
3300011508_3	Engineered	OTU-7938
3300025586_25	Non-Marine-Aquatic	OTU-12090
3300027851_54	Non-Marine-Aquatic	OTU-16400
3300027851_57	Non-Marine-Aquatic	OTU-16402
3300029904_21	Host-associated	OTU-10701
3300025547_10	Marine	OTU-2393
3300017951_49	Non-Marine-Aquatic	OTU-11593
3300017951_48	Non-Marine-Aquatic	OTU-2508
3300017951_40	Non-Marine-Aquatic	OTU-2487
3300017951_45	Non-Marine-Aquatic	OTU-3952
3300017951_46	Non-Marine-Aquatic	OTU-1535
3300025547_18	Marine	OTU-8107
3300020682_3	Non-Marine-Aquatic	OTU-14662
3300027970_32	Non-Marine-Aquatic	OTU-9755
3300027970_35	Non-Marine-Aquatic	OTU-17823
3300027788_18	Marine	OTU-9193
3300027788_10	Marine	OTU-16751
3300027788_14	Marine	OTU-16753
3300026290_72	Engineered	OTU-17224
3300026290_73	Engineered	OTU-4952
3300026290_70	Engineered	OTU-10519
3300026290_71	Engineered	OTU-358
3300028287_32	Marine	OTU-10608
3300010354_66	Non-Marine-Aquatic	OTU-12598
3300012648_5	Engineered	OTU-11848
3300013989_2	Engineered	OTU-17248
3300013989_1	Engineered	OTU-1759
3300028398_38	Non-Marine-Aquatic	OTU-13495
3300028398_36	Non-Marine-Aquatic	OTU-7624
3300028398_35	Non-Marine-Aquatic	OTU-17267
3300028398_32	Non-Marine-Aquatic	OTU-17269
3300028398_31	Non-Marine-Aquatic	OTU-14926
3300029841_29	Host-associated	OTU-7191
3300024230_8	Marine	OTU-4509
3300029881_28	Host-associated	OTU-16045
3300029881_26	Host-associated	OTU-7210
3300029881_22	Host-associated	OTU-10265
3300029881_20	Host-associated	OTU-17477
3300013151_3	Host-associated	OTU-12601
3300025560_2	Non-Marine-Aquatic	OTU-6234
3300006977_1	Host-associated	OTU-17012
3300006315_3	Marine	OTU-17642
3300029735_4	Host-associated	OTU-5892
3300021376_47	Non-Marine-Aquatic	OTU-17677
3300021376_46	Non-Marine-Aquatic	OTU-3094
3300011706_2	Engineered	OTU-4915
3300011706_3	Engineered	OTU-11098
3300011706_4	Engineered	OTU-17679
3300011706_6	Engineered	OTU-8650
3300021376_48	Non-Marine-Aquatic	OTU-3095
3300021092_59	Non-Marine-Aquatic	OTU-15246
3300021092_52	Non-Marine-Aquatic	OTU-910
3300021092_51	Non-Marine-Aquatic	OTU-13551
3300025470_10	Non-Marine-Aquatic	OTU-4230
3300025470_17	Non-Marine-Aquatic	OTU-18005
3300025470_16	Non-Marine-Aquatic	OTU-303
3300025470_15	Non-Marine-Aquatic	OTU-16465
3300025717_25	Non-Marine-Aquatic	OTU-14542
3300025356_6	Non-Marine-Aquatic	OTU-13809
3300025356_2	Non-Marine-Aquatic	OTU-13802
3300025356_9	Non-Marine-Aquatic	OTU-4326
3300014554_20	Host-associated	OTU-17549
3300029015_5	Host-associated	OTU-16537
3300029015_7	Host-associated	OTU-15627
3300029015_8	Host-associated	OTU-2849
3300026108_36	Marine	OTU-8606
3300026108_31	Marine	OTU-12211
3300009503_187	Non-Marine-Aquatic	OTU-2444
3300010312_8	Marine	OTU-207
3300010312_2	Marine	OTU-8786
3300010312_6	Marine	OTU-6970
3300010312_7	Marine	OTU-217
3300006261_10	Host-associated	OTU-6540
3300008269_1	Host-associated	OTU-12469
3300028168_6	Non-Marine-Aquatic	OTU-6221
3300028168_7	Non-Marine-Aquatic	OTU-511
3300008269_8	Host-associated	OTU-14609
3300027276_54	Terrestrial	OTU-6049
3300027276_50	Terrestrial	OTU-6052
3300006459_29	Host-associated	OTU-656
3300006459_20	Host-associated	OTU-12015
3300013443_1	Host-associated	OTU-14796
3300029647_9	Host-associated	OTU-9056
3300029647_8	Host-associated	OTU-3208
3300029647_4	Host-associated	OTU-11090
3300004630_7	Host-associated	OTU-1353
3300029830_23	Host-associated	OTU-12511
3300029830_20	Host-associated	OTU-10265
3300029830_26	Host-associated	OTU-10493
3300029830_24	Host-associated	OTU-1407
3300029830_25	Host-associated	OTU-4478
3300009540_57	Engineered	OTU-1443
3300011810_4	Engineered	OTU-25
3300011810_3	Engineered	OTU-4915
3300028638_14	Engineered	OTU-9823
3300010268_10	Engineered	OTU-13006
3300010268_12	Engineered	OTU-11148
3300010268_13	Engineered	OTU-10203
3300010268_14	Engineered	OTU-5324
3300010268_17	Engineered	OTU-4726
3300010268_18	Engineered	OTU-12715
3300010268_19	Engineered	OTU-1485
3300014963_54	Host-associated	OTU-4208
3300014963_55	Host-associated	OTU-16228
3300014963_56	Host-associated	OTU-1857
3300014963_51	Host-associated	OTU-6559
3300014963_53	Host-associated	OTU-14993
3300014963_58	Host-associated	OTU-4620
3300010279_8	Host-associated	OTU-845
3300010279_9	Host-associated	OTU-10555
3300010279_4	Host-associated	OTU-1529
3300010279_6	Host-associated	OTU-3560
3300010279_7	Host-associated	OTU-13165
3300010279_1	Host-associated	OTU-17082
3300010279_3	Host-associated	OTU-13377
3300000032_28	Engineered	OTU-15063
3300024971_8	Non-Marine-Aquatic	OTU-12858
3300024971_7	Non-Marine-Aquatic	OTU-7660
3300028602_121	Non-Marine-Aquatic	OTU-4900
3300006083_6	Non-Marine-Aquatic	OTU-1827
3300006083_7	Non-Marine-Aquatic	OTU-15506
3300006083_5	Non-Marine-Aquatic	OTU-1830
3300006083_2	Non-Marine-Aquatic	OTU-1831
3300021120_5	Non-Marine-Aquatic	OTU-14662
3300021120_4	Non-Marine-Aquatic	OTU-1750
3300025617_45	Marine	OTU-14151
3300025617_46	Marine	OTU-1852
3300021120_7	Non-Marine-Aquatic	OTU-4230
3300021120_6	Non-Marine-Aquatic	OTU-16465
3300010882_63	Host-associated	OTU-775
3300011498_3	Engineered	OTU-10126
3300010882_69	Host-associated	OTU-1871
3300028115_41	Non-Marine-Aquatic	OTU-1984
3300028115_40	Non-Marine-Aquatic	OTU-10280
3300021123_2	Non-Marine-Aquatic	OTU-18026
3300021123_1	Non-Marine-Aquatic	OTU-15909
3300021123_4	Non-Marine-Aquatic	OTU-16465
3300009779_59	Engineered	OTU-2096
3300009779_58	Engineered	OTU-2097
3300009779_57	Engineered	OTU-2098
3300009779_55	Engineered	OTU-12496
3300009779_51	Engineered	OTU-12514
3300011553_1	Engineered	OTU-1759
3300014554_8	Host-associated	OTU-11120
3300014554_9	Host-associated	OTU-13212
3300014554_7	Host-associated	OTU-2138
3300017986_12	Non-Marine-Aquatic	OTU-2152
3300027881_14	Marine	OTU-6673
3300027881_18	Marine	OTU-2169
3300015087_2	Terrestrial	OTU-13975
3300013261_1	Host-associated	OTU-2323
3300008068_1	Host-associated	OTU-10242
3300025737_28	Engineered	OTU-2470
3300025737_22	Engineered	OTU-14572
3300020466_21	Marine	OTU-2496
3300020466_23	Marine	OTU-6196
3300020466_24	Marine	OTU-9065
3300020466_28	Marine	OTU-15623
3300029827_7	Non-Marine-Aquatic	OTU-8120
3300021512_20	Non-Marine-Aquatic	OTU-9809
3300021512_22	Non-Marine-Aquatic	OTU-3105
3300029603_16	Host-associated	OTU-7680
3300029603_15	Host-associated	OTU-13372
3300029603_14	Host-associated	OTU-8068
3300029603_13	Host-associated	OTU-6055
3300029603_12	Host-associated	OTU-16095
3300029603_10	Host-associated	OTU-3269
3300029603_19	Host-associated	OTU-15885
3300029603_18	Host-associated	OTU-6928
3300012260_4	Engineered	OTU-1759
3300020196_37	Non-Marine-Aquatic	OTU-11974
3300020196_36	Non-Marine-Aquatic	OTU-3196
3300020196_34	Non-Marine-Aquatic	OTU-13130
3300020196_33	Non-Marine-Aquatic	OTU-6899
3300020196_39	Non-Marine-Aquatic	OTU-3094
3300009779_6	Engineered	OTU-2844
3300009779_2	Engineered	OTU-2848
3300020369_15	Marine	OTU-9264
3300020369_14	Marine	OTU-2969
3300020369_11	Marine	OTU-2970
3300020369_10	Marine	OTU-14799
3300020369_13	Marine	OTU-2971
3300018023_27	Non-Marine-Aquatic	OTU-435
3300006847_24	Host-associated	OTU-9068
3300006847_27	Host-associated	OTU-3127
3300006847_28	Host-associated	OTU-12636
3300011886_3	Engineered	OTU-3115
3300011886_2	Engineered	OTU-14174
3300011886_5	Engineered	OTU-11403
3300011886_4	Engineered	OTU-4618
3300011835_4	Engineered	OTU-4055
3300011835_3	Engineered	OTU-13061
3300011835_2	Engineered	OTU-3189
3300020603_70	Non-Marine-Aquatic	OTU-13543
3300020603_72	Non-Marine-Aquatic	OTU-17677
3300020603_73	Non-Marine-Aquatic	OTU-17785
3300020603_74	Non-Marine-Aquatic	OTU-16435
3300020603_76	Non-Marine-Aquatic	OTU-9724
3300020603_77	Non-Marine-Aquatic	OTU-3094
3300020603_79	Non-Marine-Aquatic	OTU-13551
3300008144_19	Host-associated	OTU-3364
3300005512_17	Non-Marine-Aquatic	OTU-3367
3300005512_14	Non-Marine-Aquatic	OTU-2325
3300005512_15	Non-Marine-Aquatic	OTU-3369
3300005512_12	Non-Marine-Aquatic	OTU-3370
3300005512_13	Non-Marine-Aquatic	OTU-13193
3300005512_10	Non-Marine-Aquatic	OTU-3372
3300005512_11	Non-Marine-Aquatic	OTU-11227
3300029458_9	Host-associated	OTU-12878
3300029458_8	Host-associated	OTU-3518
3300029458_5	Host-associated	OTU-11090
3300029458_7	Host-associated	OTU-12136
3300029458_6	Host-associated	OTU-16537
3300010358_12	Terrestrial	OTU-3531
3300013136_114	Non-Marine-Aquatic	OTU-11278
3300013136_117	Non-Marine-Aquatic	OTU-3555
3300013136_116	Non-Marine-Aquatic	OTU-1636
3300013136_111	Non-Marine-Aquatic	OTU-7793
3300013136_113	Non-Marine-Aquatic	OTU-15751
3300013136_118	Non-Marine-Aquatic	OTU-947
3300005288_8	Host-associated	OTU-3673
3300000362_29	Non-Marine-Aquatic	OTU-4575
3300027188_2	Marine	OTU-12598
3300029214_13	Host-associated	OTU-11806
3300029214_11	Host-associated	OTU-9180
3300029214_10	Host-associated	OTU-8643
3300029214_17	Host-associated	OTU-15671
3300029214_15	Host-associated	OTU-10539
3300029214_14	Host-associated	OTU-7210
3300029214_19	Host-associated	OTU-9258
3300028068_5	Terrestrial	OTU-12014
3300012178_7	Non-Marine-Aquatic	OTU-3717
3300029875_25	Host-associated	OTU-5974
3300029875_27	Host-associated	OTU-10259
3300029875_26	Host-associated	OTU-11702
3300017533_9	Non-Marine-Aquatic	OTU-3799
3300027815_19	Non-Marine-Aquatic	OTU-3858
3300007915_3	Host-associated	OTU-3859
3300007915_2	Host-associated	OTU-3860
3300027815_11	Non-Marine-Aquatic	OTU-3864
3300027815_13	Non-Marine-Aquatic	OTU-3865
3300014769_10	Host-associated	OTU-11806
3300025727_48	Marine	OTU-10825
3300025727_44	Marine	OTU-738
3300025727_42	Marine	OTU-17036
3300020389_13	Marine	OTU-2544
3300020389_16	Marine	OTU-4776
3300029441_12	Host-associated	OTU-2115
3300029441_11	Host-associated	OTU-3269
3300029441_10	Host-associated	OTU-8643
3300029441_17	Host-associated	OTU-13655
3300029106_17	Host-associated	OTU-6500
3300029106_11	Host-associated	OTU-2849
3300029441_15	Host-associated	OTU-8068
3300029106_12	Host-associated	OTU-15901
3300029441_14	Host-associated	OTU-6831
3300029106_19	Host-associated	OTU-11280
3300029728_9	Host-associated	OTU-7875
3300000228_25	Non-Marine-Aquatic	OTU-14694
3300000228_29	Non-Marine-Aquatic	OTU-3882
3300013130_27	Non-Marine-Aquatic	OTU-11817
3300005337_13	Terrestrial	OTU-5810
3300005337_12	Terrestrial	OTU-4412
3300002504_2	Host-associated	OTU-4521
3300002504_9	Host-associated	OTU-9334
3300029428_14	Host-associated	OTU-6831
3300029428_12	Host-associated	OTU-16633
3300029428_13	Host-associated	OTU-937
3300029428_10	Host-associated	OTU-8294
3300025175_2	Marine	OTU-8606
3300025175_1	Marine	OTU-17892
3300007966_31	Host-associated	OTU-2031
3300027965_8	Terrestrial	OTU-4632
3300026994_7	Engineered	OTU-4877
3300026994_6	Engineered	OTU-10040
3300029379_39	Host-associated	OTU-10259
3300029379_32	Host-associated	OTU-12522
3300029379_31	Host-associated	OTU-15479
3300029379_37	Host-associated	OTU-5974
3300029379_35	Host-associated	OTU-16633
3300008678_1	Host-associated	OTU-17012
3300011974_38	Host-associated	OTU-2214
3300005858_21	Non-Marine-Aquatic	OTU-7568
3300024413_7	Marine	OTU-11787
3300024413_9	Marine	OTU-464
3300027962_34	Non-Marine-Aquatic	OTU-9096
3300029045_6	Host-associated	OTU-8643
3300010299_21	Non-Marine-Aquatic	OTU-5134
3300010299_24	Non-Marine-Aquatic	OTU-13963
3300010299_26	Non-Marine-Aquatic	OTU-76
3300029562_30	Host-associated	OTU-6914
3300007519_37	Non-Marine-Aquatic	OTU-6813
3300007519_35	Non-Marine-Aquatic	OTU-6814
3300012080_12	Host-associated	OTU-5224
3300012080_11	Host-associated	OTU-6804
3300012080_14	Host-associated	OTU-11606
3300000160_10	Marine	OTU-5120
3300008481_35	Host-associated	OTU-6690
3300009503_252	Non-Marine-Aquatic	OTU-15282
3300009503_254	Non-Marine-Aquatic	OTU-9172
3300011988_12	Host-associated	OTU-15018
3300011988_13	Host-associated	OTU-5436
3300011988_10	Host-associated	OTU-12504
3300011988_11	Host-associated	OTU-16863
3300011988_16	Host-associated	OTU-5439
3300011988_14	Host-associated	OTU-12106
3300011988_15	Host-associated	OTU-5442
3300011988_18	Host-associated	OTU-15050
3300011988_19	Host-associated	OTU-4300
3300013123_18	Non-Marine-Aquatic	OTU-5450
3300013123_17	Non-Marine-Aquatic	OTU-8862
3300013123_12	Non-Marine-Aquatic	OTU-5455
3300013123_11	Non-Marine-Aquatic	OTU-7330
3300018933_11	Terrestrial	OTU-15173
3300018933_10	Terrestrial	OTU-7481
3300018933_12	Terrestrial	OTU-875
3300025542_7	Engineered	OTU-8246
3300025542_6	Engineered	OTU-7176
3300025542_3	Engineered	OTU-6123
3300024262_30	Non-Marine-Aquatic	OTU-5566
3300024262_33	Non-Marine-Aquatic	OTU-5567
3300024262_32	Non-Marine-Aquatic	OTU-15768
3300029227_9	Host-associated	OTU-8643
3300029227_8	Host-associated	OTU-3269
3300007979_26	Host-associated	OTU-11753
3300007979_24	Host-associated	OTU-15720
3300007979_25	Host-associated	OTU-5750
3300007979_22	Host-associated	OTU-16840
3300007979_23	Host-associated	OTU-1061
3300007979_21	Host-associated	OTU-5244
3300028640_11	Engineered	OTU-15052
3300028571_19	Non-Marine-Aquatic	OTU-17358
3300028571_17	Non-Marine-Aquatic	OTU-11376
3300028571_14	Non-Marine-Aquatic	OTU-17392
3300025721_13	Terrestrial	OTU-5937
3300025721_16	Terrestrial	OTU-5938
3300025721_17	Terrestrial	OTU-15519
3300027730_60	Non-Marine-Aquatic	OTU-17134
3300025236_7	Marine	OTU-12646
3300025236_5	Marine	OTU-6104
3300025236_4	Marine	OTU-9683
3300025236_3	Marine	OTU-6106
3300025236_2	Marine	OTU-4081
3300025236_9	Marine	OTU-414
3300009156_66	Host-associated	OTU-10190
3300029538_16	Host-associated	OTU-3559
3300005255_2	Non-Marine-Aquatic	OTU-15902
3300005067_11	Non-Marine-Aquatic	OTU-6395
3300005067_13	Non-Marine-Aquatic	OTU-2661
3300005067_14	Non-Marine-Aquatic	OTU-7966
3300005067_17	Non-Marine-Aquatic	OTU-12173
3300005067_16	Non-Marine-Aquatic	OTU-6401
3300005067_18	Non-Marine-Aquatic	OTU-15718
3300022832_3	Non-Marine-Aquatic	OTU-6164
3300022832_5	Non-Marine-Aquatic	OTU-10447
3300008138_11	Host-associated	OTU-8087
3300007527_11	Host-associated	OTU-1134
3300007527_15	Host-associated	OTU-6690
3300002053_36	Non-Marine-Aquatic	OTU-6555
3300001095_3	Engineered	OTU-6577
3300013128_104	Non-Marine-Aquatic	OTU-6755
3300010276_31	Engineered	OTU-13005
3300010276_30	Engineered	OTU-9509
3300010276_33	Engineered	OTU-844
3300010276_32	Engineered	OTU-6758
3300025880_20	Marine	OTU-9655
3300025880_25	Marine	OTU-14037
3300025880_24	Marine	OTU-5085
3300025880_28	Marine	OTU-8764
3300017931_25	Non-Marine-Aquatic	OTU-16798
3300017931_26	Non-Marine-Aquatic	OTU-435
3300012280_6	Engineered	OTU-6820
3300012280_4	Engineered	OTU-12481
3300012280_2	Engineered	OTU-11098
3300029702_17	Host-associated	OTU-6024
3300029702_16	Host-associated	OTU-14459
3300029513_24	Host-associated	OTU-2563
3300029513_25	Host-associated	OTU-3273
3300029702_13	Host-associated	OTU-4615
3300029513_23	Host-associated	OTU-4620
3300029513_21	Host-associated	OTU-9151
3300008524_9	Host-associated	OTU-8087
3300006226_135	Host-associated	OTU-7160
3300020025_2	Terrestrial	OTU-3889
3300025286_64	Marine	OTU-15651
3300006525_29	Host-associated	OTU-1857
3300006525_25	Host-associated	OTU-5791
3300006525_23	Host-associated	OTU-12346
3300011604_4	Engineered	OTU-139
3300011604_3	Engineered	OTU-16614
3300011604_2	Engineered	OTU-7222
3300011604_1	Engineered	OTU-13541
3300029337_28	Host-associated	OTU-5974
3300029337_22	Host-associated	OTU-12878
3300029337_23	Host-associated	OTU-15538
3300029337_21	Host-associated	OTU-8294
3300029337_26	Host-associated	OTU-1710
3300029337_27	Host-associated	OTU-9493
3300029337_24	Host-associated	OTU-2260
3300029337_25	Host-associated	OTU-17053
3300010375_99	Host-associated	OTU-8831
3300027839_112	Marine	OTU-12822
3300017522_43	Non-Marine-Aquatic	OTU-7649
3300017522_41	Non-Marine-Aquatic	OTU-9934
3300017522_46	Non-Marine-Aquatic	OTU-11917
3300017522_48	Non-Marine-Aquatic	OTU-7657
3300027490_8	Terrestrial	OTU-3590
3300027490_2	Terrestrial	OTU-2562
3300021373_22	Marine	OTU-7719
3300021373_23	Marine	OTU-12656
3300021373_20	Marine	OTU-7721
3300021373_25	Marine	OTU-7724
3300008282_33	Host-associated	OTU-3273
3300015214_129	Engineered	OTU-14585
3300015214_124	Engineered	OTU-7743
3300025713_34	Engineered	OTU-13254
3300022919_6	Terrestrial	OTU-7794
3300020450_21	Marine	OTU-8210
3300029469_13	Host-associated	OTU-10265
3300029469_16	Host-associated	OTU-15179
3300007996_31	Host-associated	OTU-12046
3300007996_38	Host-associated	OTU-5377
3300029031_15	Host-associated	OTU-6914
3300027395_1	Host-associated	OTU-17062
3300027395_3	Host-associated	OTU-13066
3300025057_3	Marine	OTU-12646
3300025057_5	Marine	OTU-16901
3300008561_10	Host-associated	OTU-14742
3300027387_12	Marine	OTU-6325
3300027387_11	Marine	OTU-14461
3300021431_72	Host-associated	OTU-14562
3300011006_17	Host-associated	OTU-8340
3300011006_16	Host-associated	OTU-8341
3300011006_15	Host-associated	OTU-8435
3300011006_14	Host-associated	OTU-8342
3300011006_13	Host-associated	OTU-8343
3300027909_24	Host-associated	OTU-1304
3300020603_19	Non-Marine-Aquatic	OTU-1250
3300029475_14	Host-associated	OTU-3617
3300029475_15	Host-associated	OTU-8445
3300029475_16	Host-associated	OTU-8446
3300029475_17	Host-associated	OTU-10265
3300029475_10	Host-associated	OTU-12878
3300029475_12	Host-associated	OTU-8448
3300029475_13	Host-associated	OTU-8449
3300029475_18	Host-associated	OTU-12511
3300025286_6	Marine	OTU-8456
3300025286_7	Marine	OTU-6430
3300025286_4	Marine	OTU-31
3300025286_5	Marine	OTU-7401
3300014208_89	Non-Marine-Aquatic	OTU-8471
3300014208_88	Non-Marine-Aquatic	OTU-8472
3300014208_84	Non-Marine-Aquatic	OTU-8473
3300014208_81	Non-Marine-Aquatic	OTU-8475
3300014208_82	Non-Marine-Aquatic	OTU-8477
3300012804_6	Terrestrial	OTU-7325
3300029129_19	Host-associated	OTU-14336
3300008361_3	Host-associated	OTU-16537
3300021471_9	Non-Marine-Aquatic	OTU-13399
3300008361_2	Host-associated	OTU-1996
3300027870_64	Non-Marine-Aquatic	OTU-11247
3300029211_10	Host-associated	OTU-1410
3300029211_13	Host-associated	OTU-10265
3300029211_16	Host-associated	OTU-5974
3300029211_18	Host-associated	OTU-10259
3300029211_19	Host-associated	OTU-13794
3300010403_18	Terrestrial	OTU-7378
3300020204_49	Non-Marine-Aquatic	OTU-5688
3300020204_46	Non-Marine-Aquatic	OTU-5679
3300020204_41	Non-Marine-Aquatic	OTU-12820
3300020204_42	Non-Marine-Aquatic	OTU-3409
3300025613_53	Engineered	OTU-15969
3300025613_55	Engineered	OTU-8910
3300025613_59	Engineered	OTU-12756
3300029012_9	Host-associated	OTU-3559
3300029012_8	Host-associated	OTU-937
3300029012_6	Host-associated	OTU-1872
3300029012_5	Host-associated	OTU-9512
3300029012_4	Host-associated	OTU-1996
3300011981_46	Host-associated	OTU-3273
3300011981_40	Host-associated	OTU-12317
3300012007_27	Host-associated	OTU-8931
3300008420_27	Host-associated	OTU-16994
3300025770_42	Marine	OTU-16699
3300025770_45	Marine	OTU-1923
3300025702_32	Engineered	OTU-9501
3300025702_38	Engineered	OTU-9352
3300020469_54	Marine	OTU-16742
3300027706_43	Terrestrial	OTU-9391
3300027706_41	Terrestrial	OTU-2537
3300027706_47	Terrestrial	OTU-14438
3300020469_52	Marine	OTU-11488
3300027706_49	Terrestrial	OTU-17350
3300025963_1	Non-Marine-Aquatic	OTU-16463
3300029060_16	Host-associated	OTU-10136
3300029060_17	Host-associated	OTU-9258
3300029060_14	Host-associated	OTU-13372
3300029060_15	Host-associated	OTU-2910
3300029060_12	Host-associated	OTU-10555
3300029060_13	Host-associated	OTU-6089
3300029060_11	Host-associated	OTU-3559
3300029060_18	Host-associated	OTU-3917
3300029060_19	Host-associated	OTU-10265
3300008731_1	Host-associated	OTU-10295
3300008731_2	Host-associated	OTU-16027
3300015060_2	Engineered	OTU-1689
3300026140_8	Non-Marine-Aquatic	OTU-4844
3300017452_43	Non-Marine-Aquatic	OTU-9639
3300017452_46	Non-Marine-Aquatic	OTU-9642
3300017452_44	Non-Marine-Aquatic	OTU-3282
3300017452_48	Non-Marine-Aquatic	OTU-9647
3300012156_10	Host-associated	OTU-9729
3300012156_16	Host-associated	OTU-9731
3300012156_14	Host-associated	OTU-143
3300012156_15	Host-associated	OTU-7972
3300011177_6	Non-Marine-Aquatic	OTU-165
3300011177_7	Non-Marine-Aquatic	OTU-6519
3300011177_5	Non-Marine-Aquatic	OTU-171
3300005470_11	Non-Marine-Aquatic	OTU-12722
3300025456_37	Marine	OTU-1923
3300025925_21	Host-associated	OTU-5721
3300025925_27	Host-associated	OTU-9962
3300025925_29	Host-associated	OTU-17415
3300021400_76	Host-associated	OTU-500
3300021400_74	Host-associated	OTU-9969
3300021400_79	Host-associated	OTU-13391
3300017963_24	Non-Marine-Aquatic	OTU-13969
3300006292_40	Host-associated	OTU-2214
3300012974_16	Host-associated	OTU-10164
3300012974_17	Host-associated	OTU-11090
3300012974_15	Host-associated	OTU-10166
3300012974_18	Host-associated	OTU-10169
3300012974_19	Host-associated	OTU-7075
3300020404_22	Marine	OTU-10192
3300020404_25	Marine	OTU-10194
3300001781_11	Non-Marine-Aquatic	OTU-15317
3300010158_28	Non-Marine-Aquatic	OTU-10258
3300010158_26	Non-Marine-Aquatic	OTU-10260
3300010158_20	Non-Marine-Aquatic	OTU-10266
3300027851_27	Non-Marine-Aquatic	OTU-7707
3300025894_35	Marine	OTU-8206
3300025894_32	Marine	OTU-13041
3300025894_31	Marine	OTU-6278
3300025894_30	Marine	OTU-6756
3300008619_2	Host-associated	OTU-4322
3300008619_4	Host-associated	OTU-9067
3300008619_9	Host-associated	OTU-3034
3300007317_17	Host-associated	OTU-10483
3300007317_11	Host-associated	OTU-6459
3300007317_10	Host-associated	OTU-11978
3300007317_13	Host-associated	OTU-10340
3300007317_12	Host-associated	OTU-2173
3300029505_10	Host-associated	OTU-10265
3300029505_11	Host-associated	OTU-11698
3300029409_17	Host-associated	OTU-10541
3300008144_43	Host-associated	OTU-10363
3300008144_41	Host-associated	OTU-11088
3300026522_23	Host-associated	OTU-3436
3300028414_8	Marine	OTU-3012
3300028414_7	Marine	OTU-4993
3300029436_32	Host-associated	OTU-13932
3300029436_31	Host-associated	OTU-18020
3300029436_30	Host-associated	OTU-15671
3300027515_3	Non-Marine-Aquatic	OTU-15757
3300027515_2	Non-Marine-Aquatic	OTU-17831
3300027515_6	Non-Marine-Aquatic	OTU-15923
3300027515_4	Non-Marine-Aquatic	OTU-10896
3300027515_9	Non-Marine-Aquatic	OTU-11286
3300007299_14	Host-associated	OTU-13648
3300029361_14	Host-associated	OTU-2435
3300029361_16	Host-associated	OTU-10726
3300029361_17	Host-associated	OTU-12878
3300029361_11	Host-associated	OTU-8294
3300029361_12	Host-associated	OTU-15179
3300029361_18	Host-associated	OTU-2416
3300029361_19	Host-associated	OTU-12522
3300011169_5	Non-Marine-Aquatic	OTU-171
3300027343_6	Engineered	OTU-12980
3300027343_7	Engineered	OTU-9886
3300020220_58	Non-Marine-Aquatic	OTU-3196
[truncated: 50,495 more rows]

## Sheet: Supplementary Data 11
GCF_GCA	filename	acc:assembly_genbank	id	tax:class	tax:family	tax:fastani_ref	tax:genus	tax:gtdb_classification	tax:kingdom	tax:order	tax:organism	tax:phylum	tax:species	tax:strain	tax:sw_name	tax:sw_release	No RBS protein	All protein	percentage	DB
GCF_003571035.1	/data2/marine_genomes_and_metagenomes/genomes_The_MAR_databases/prodigal_short/Klebsiella/Klebsiella_pneumoniae_C14_15_09Ph_GCF_003571035.1.fas	§insdc.gca:GCA_003571035.1	§mmp.db:MMP09710960	Gammaproteobacteria	Enterobacteriaceae	§gtdb:GCF_000742135.1	Klebsiella	Bacteria|Proteobacteria|Gammaproteobacteria|Enterobacterales|Enterobacteriaceae|Klebsiella|Klebsiella pneumoniae	Bacteria	Enterobacterales	Klebsiella pneumoniae§taxonomy:573	Proteobacteria	Klebsiella pneumoniae	C14_15_09Ph	0	0	493	5352	0.0921151	MarDB
GCF_002104635.1	/data2/marine_genomes_and_metagenomes/genomes_The_MAR_databases/prodigal_short/Klebsiella/Klebsiella_pneumoniae_BO2_GCF_002104635.1.fas	§insdc.gca:GCA_002104635.1	§mmp.db:MMP06717781	Gammaproteobacteria	Enterobacteriaceae	§gtdb:GCF_000742135.1	Klebsiella	Bacteria|Proteobacteria|Gammaproteobacteria|Enterobacterales|Enterobacteriaceae|Klebsiella|Klebsiella pneumoniae	Bacteria	Enterobacterales	Klebsiella pneumoniae§taxonomy:573	Proteobacteria	Unclassified	BO2	0	0	620	5306	0.116849	MarDB
GCF_003330945.1	/data2/marine_genomes_and_metagenomes/genomes_The_MAR_databases/prodigal_short/Klebsiella/Klebsiella_pneumoniae_subsp._pneumoniae_KC-Pl-HB1_GCF_003330945.1.fas	§insdc.gca:GCA_003330945.1	§mmp.ref:MMP09638204	Gammaproteobacteria	Enterobacteriaceae	§gtdb:GCF_000742135.1	Klebsiella	Bacteria|Proteobacteria|Gammaproteobacteria|Enterobacterales|Enterobacteriaceae|Klebsiella|Klebsiella pneumoniae	Bacteria	Enterobacterales	Klebsiella pneumoniae subsp. pneumoniae§taxonomy:72407	Proteobacteria	Klebsiella pneumoniae	KC-Pl-HB1	0	0	554	5116	0.108288	MarRef
GCF_002204605.1	/data2/marine_genomes_and_metagenomes/genomes_The_MAR_databases/prodigal_short/Klebsiella/Klebsiella_aerogenes_PX01_GCF_002204605.1.fas	§insdc.gca:GCA_002204605.1	§mmp.db:MMP07249743	Gammaproteobacteria	Enterobacteriaceae	§gtdb:GCF_000215745.1	Klebsiella	Bacteria|Proteobacteria|Gammaproteobacteria|Enterobacterales|Enterobacteriaceae|Klebsiella_B|Klebsiella_B aerogenes	Bacteria	Enterobacterales	Klebsiella aerogenes§taxonomy:548	Proteobacteria	Unclassified	PX01	0	0	513	4932	0.104015	MarDB
GCF_003571155.1	/data2/marine_genomes_and_metagenomes/genomes_The_MAR_databases/prodigal_short/Klebsiella/Klebsiella_pneumoniae_E02_03_112Ph_GCF_003571155.1.fas	§insdc.gca:GCA_003571155.1	§mmp.db:MMP09710956	Gammaproteobacteria	Enterobacteriaceae	§gtdb:GCF_000742135.1	Klebsiella	Bacteria|Proteobacteria|Gammaproteobacteria|Enterobacterales|Enterobacteriaceae|Klebsiella|Klebsiella pneumoniae	Bacteria	Enterobacterales	Klebsiella pneumoniae§taxonomy:573	Proteobacteria	Klebsiella pneumoniae	E02_03_112Ph	0	0	762	5447	0.139894	MarDB
GCF_003571145.1	/data2/marine_genomes_and_metagenomes/genomes_The_MAR_databases/prodigal_short/Klebsiella/Klebsiella_pneumoniae_D14_15_08Ph_GCF_003571145.1.fas	§insdc.gca:GCA_003571145.1	§mmp.db:MMP09710959	Gammaproteobacteria	Enterobacteriaceae	§gtdb:GCF_000742135.1	Klebsiella	Bacteria|Proteobacteria|Gammaproteobacteria|Enterobacterales|Enterobacteriaceae|Klebsiella|Klebsiella pneumoniae	Bacteria	Enterobacterales	Klebsiella pneumoniae§taxonomy:573	Proteobacteria	Klebsiella pneumoniae	D14_15_08Ph	0	0	498	4983	0.0999398	MarDB
GCF_003571065.1	/data2/marine_genomes_and_metagenomes/genomes_The_MAR_databases/prodigal_short/Klebsiella/Klebsiella_pneumoniae_S13_04Ph_GCF_003571065.1.fas	§insdc.gca:GCA_003571065.1	§mmp.db:MMP09710958	Gammaproteobacteria	Enterobacteriaceae	§gtdb:GCF_000742135.1	Klebsiella	Bacteria|Proteobacteria|Gammaproteobacteria|Enterobacterales|Enterobacteriaceae|Klebsiella|Klebsiella pneumoniae	Bacteria	Enterobacterales	Klebsiella pneumoniae§taxonomy:573	Proteobacteria	Klebsiella pneumoniae	S13_04Ph	0	0	714	5373	0.132887	MarDB
GCF_002104395.1	/data2/marine_genomes_and_metagenomes/genomes_The_MAR_databases/prodigal_short/Klebsiella/Klebsiella_pneumoniae_JM2CRO_GCF_002104395.1.fas	§insdc.gca:GCA_002104395.1	§mmp.db:MMP06717779	Gammaproteobacteria	Enterobacteriaceae	§gtdb:GCF_000742135.1	Klebsiella	Bacteria|Proteobacteria|Gammaproteobacteria|Enterobacterales|Enterobacteriaceae|Klebsiella|Klebsiella pneumoniae	Bacteria	Enterobacterales	Klebsiella pneumoniae§taxonomy:573	Proteobacteria	Unclassified	JM2CRO	0	0	671	5296	0.126699	MarDB
GCF_003253555.1	/data2/marine_genomes_and_metagenomes/genomes_The_MAR_databases/prodigal_short/Klebsiella/Klebsiella_sp._NFIX53_GCF_003253555.1.fas	§insdc.gca:GCA_003253555.1	§mmp.db:MMP06161047	Gammaproteobacteria	Enterobacteriaceae	§gtdb:GCF_000751755.1	Klebsiella	Bacteria|Proteobacteria|Gammaproteobacteria|Enterobacterales|Enterobacteriaceae|Klebsiella|Klebsiella quasipneumoniae	Bacteria	Enterobacterales	Klebsiella sp. NFIX53§taxonomy:1566297	Proteobacteria	Klebsiella sp. NFIX53	NFIX53	0	0	443	5034	0.0880016	MarDB
GCF_003674665.1	/data2/marine_genomes_and_metagenomes/genomes_The_MAR_databases/prodigal_short/Streptococcus/Streptococcus_iniae_QMA0236_GCF_003674665.1.fas	§insdc.gca:GCA_003674665.1	§mmp.db:MMP09104508	Bacilli	Streptococcaceae	§gtdb:GCF_001595425.1	Streptococcus	Bacteria|Firmicutes|Bacilli|Lactobacillales|Streptococcaceae|Streptococcus|Streptococcus iniae	Bacteria	Lactobacillales	Streptococcus iniae§taxonomy:1346	Firmicutes	Streptococcus iniae	QMA0236	0	0	214	1994	0.107322	MarDB
GCF_003697565.1	/data2/marine_genomes_and_metagenomes/genomes_The_MAR_databases/prodigal_short/Streptococcus/Streptococcus_iniae_QMA0142_GCF_003697565.1.fas	§insdc.gca:GCA_003697565.1	§mmp.db:MMP09104478	Bacilli	Streptococcaceae	§gtdb:GCF_001595425.1	Streptococcus	Bacteria|Firmicutes|Bacilli|Lactobacillales|Streptococcaceae|Streptococcus|Streptococcus iniae	Bacteria	Lactobacillales	Streptococcus iniae§taxonomy:1346	Firmicutes	Streptococcus iniae	QMA0142	0	0	196	1794	0.109253	MarDB
GCF_003674895.1	/data2/marine_genomes_and_metagenomes/genomes_The_MAR_databases/prodigal_short/Streptococcus/Streptococcus_iniae_QMA0191_GCF_003674895.1.fas	§insdc.gca:GCA_003674895.1	§mmp.db:MMP09104498	Bacilli	Streptococcaceae	§gtdb:GCF_001595425.1	Streptococcus	Bacteria|Firmicutes|Bacilli|Lactobacillales|Streptococcaceae|Streptococcus|Streptococcus iniae	Bacteria	Lactobacillales	Streptococcus iniae§taxonomy:1346	Firmicutes	Streptococcus iniae	QMA0191	0	0	198	1797	0.110184	MarDB
GCF_003675285.1	/data2/marine_genomes_and_metagenomes/genomes_The_MAR_databases/prodigal_short/Streptococcus/Streptococcus_iniae_QMA0074_GCF_003675285.1.fas	§insdc.gca:GCA_003675285.1	§mmp.db:MMP09104460	Bacilli	Streptococcaceae	§gtdb:GCF_001595425.1	Streptococcus	Bacteria|Firmicutes|Bacilli|Lactobacillales|Streptococcaceae|Streptococcus|Streptococcus iniae	Bacteria	Lactobacillales	Streptococcus iniae§taxonomy:1346	Firmicutes	Streptococcus iniae	QMA0074	0	0	208	1912	0.108787	MarDB
GCF_003697505.1	/data2/marine_genomes_and_metagenomes/genomes_The_MAR_databases/prodigal_short/Streptococcus/Streptococcus_iniae_QMA0159_GCF_003697505.1.fas	§insdc.gca:GCA_003697505.1	§mmp.db:MMP09104484	Bacilli	Streptococcaceae	§gtdb:GCF_001595425.1	Streptococcus	Bacteria|Firmicutes|Bacilli|Lactobacillales|Streptococcaceae|Streptococcus|Streptococcus iniae	Bacteria	Lactobacillales	Streptococcus iniae§taxonomy:1346	Firmicutes	Streptococcus iniae	QMA0159	0	0	211	1921	0.109839	MarDB
GCF_002382925.1	/data2/marine_genomes_and_metagenomes/genomes_The_MAR_databases/prodigal_short/Streptococcus/Streptococcus_parauberis_AZ70.1_GCF_002382925.1.fas	§insdc.gca:GCA_002382925.1	§mmp.db:MMP05210280	Bacilli	Streptococcaceae	§gtdb:GCF_000187935.1	Streptococcus	Bacteria|Firmicutes|Bacilli|Lactobacillales|Streptococcaceae|Streptococcus|Streptococcus parauberis	Bacteria	Lactobacillales	Streptococcus parauberis§taxonomy:1348	Firmicutes	Unclassified	AZ70.1	0	0	218	1998	0.109109	MarDB
GCF_000831485.1	/data2/marine_genomes_and_metagenomes/genomes_The_MAR_databases/prodigal_short/Streptococcus/Streptococcus_iniae_YSFST01-82_GCF_000831485.1.fas	§insdc.gca:GCA_000831485.1	§mmp.ref:MMP03286870	Bacilli	Streptococcaceae	§gtdb:GCF_001595425.1	Streptococcus	Bacteria|Firmicutes|Bacilli|Lactobacillales|Streptococcaceae|Streptococcus|Streptococcus iniae	Bacteria	Lactobacillales	Streptococcus iniae§taxonomy:1346	Firmicutes	Streptococcus iniae	YSFST01-82	0	0	229	1988	0.115191	MarRef
GCF_003674715.1	/data2/marine_genomes_and_metagenomes/genomes_The_MAR_databases/prodigal_short/Streptococcus/Streptococcus_iniae_QMA0233_GCF_003674715.1.fas	§insdc.gca:GCA_003674715.1	§mmp.db:MMP09104505	Bacilli	Streptococcaceae	§gtdb:GCF_001595425.1	Streptococcus	Bacteria|Firmicutes|Bacilli|Lactobacillales|Streptococcaceae|Streptococcus|Streptococcus iniae	Bacteria	Lactobacillales	Streptococcus iniae§taxonomy:1346	Firmicutes	Streptococcus iniae	QMA0233	0	0	214	1996	0.107214	MarDB
GCF_003174235.1	/data2/marine_genomes_and_metagenomes/genomes_The_MAR_databases/prodigal_short/Streptococcus/Streptococcus_agalactiae_QMA0321_GCF_003174235.1.fas	§insdc.gca:GCA_003174235.1	§mmp.db:MMP07998585	Bacilli	Streptococcaceae	§gtdb:GCF_000186445.1	Streptococcus	Bacteria|Firmicutes|Bacilli|Lactobacillales|Streptococcaceae|Streptococcus|Streptococcus agalactiae	Bacteria	Lactobacillales	Streptococcus agalactiae§taxonomy:1311	Firmicutes	Streptococcus agalactiae	QMA0321	0	0	252	2090	0.120574	MarDB
GCF_003674355.1	/data2/marine_genomes_and_metagenomes/genomes_The_MAR_databases/prodigal_short/Streptococcus/Streptococcus_iniae_QMA0374_GCF_003674355.1.fas	§insdc.gca:GCA_003674355.1	§mmp.db:MMP09104523	Bacilli	Streptococcaceae	§gtdb:GCF_001595425.1	Streptococcus	Bacteria|Firmicutes|Bacilli|Lactobacillales|Streptococcaceae|Streptococcus|Streptococcus iniae	Bacteria	Lactobacillales	Streptococcus iniae§taxonomy:1346	Firmicutes	Streptococcus iniae	QMA0374	0	0	200	1902	0.105152	MarDB
GCF_000691825.1	/data2/marine_genomes_and_metagenomes/genomes_The_MAR_databases/prodigal_short/Streptococcus/Streptococcus_parauberis_SK-417_GCF_000691825.1.fas	§insdc.gca:GCA_000691825.1	§mmp.db:MMP00000349	Bacilli	Streptococcaceae	§gtdb:GCF_000187935.1	Streptococcus	Bacteria|Firmicutes|Bacilli|Lactobacillales|Streptococcaceae|Streptococcus|Streptococcus parauberis	Bacteria	Lactobacillales	Streptococcus parauberis§taxonomy:1348	Firmicutes	Unclassified	SK-417	0	0	246	1959	0.125574	MarDB
GCF_003697545.1	/data2/marine_genomes_and_metagenomes/genomes_The_MAR_databases/prodigal_short/Streptococcus/Streptococcus_iniae_QMA0156_GCF_003697545.1.fas	§insdc.gca:GCA_003697545.1	§mmp.db:MMP09104481	Bacilli	Streptococcaceae	§gtdb:GCF_001595425.1	Streptococcus	Bacteria|Firmicutes|Bacilli|Lactobacillales|Streptococcaceae|Streptococcus|Streptococcus iniae	Bacteria	Lactobacillales	Streptococcus iniae§taxonomy:1346	Firmicutes	Streptococcus iniae	QMA0156	0	0	199	1921	0.103592	MarDB
GCF_003674795.1	/data2/marine_genomes_and_metagenomes/genomes_The_MAR_databases/prodigal_short/Streptococcus/Streptococcus_iniae_QMA0218_GCF_003674795.1.fas	§insdc.gca:GCA_003674795.1	§mmp.db:MMP09104501	Bacilli	Streptococcaceae	§gtdb:GCF_001595425.1	Streptococcus	Bacteria|Firmicutes|Bacilli|Lactobacillales|Streptococcaceae|Streptococcus|Streptococcus iniae	Bacteria	Lactobacillales	Streptococcus iniae§taxonomy:1346	Firmicutes	Streptococcus iniae	QMA0218	0	0	202	1904	0.106092	MarDB
GCF_000322705.1	/data2/marine_genomes_and_metagenomes/genomes_The_MAR_databases/prodigal_short/Streptococcus/Streptococcus_agalactiae_MRI_Z1-203_GCF_000322705.1.fas	§insdc.gca:GCA_000322705.1	§mmp.db:MMP02436258	Bacilli	Streptococcaceae	§gtdb:GCF_000186445.1	Streptococcus	Bacteria|Firmicutes|Bacilli|Lactobacillales|Streptococcaceae|Streptococcus|Streptococcus agalactiae	Bacteria	Lactobacillales	Streptococcus agalactiae MRI Z1-203§taxonomy:1154840	Firmicutes	Streptococcus agalactiae	MRI Z1-203	0	0	252	2019	0.124814	MarDB
GCF_000322525.1	/data2/marine_genomes_and_metagenomes/genomes_The_MAR_databases/prodigal_short/Streptococcus/Streptococcus_agalactiae_MRI_Z1-200_GCF_000322525.1.fas	§insdc.gca:GCA_000322525.1	§mmp.db:MMP02436213	Bacilli	Streptococcaceae	§gtdb:GCF_000186445.1	Streptococcus	Bacteria|Firmicutes|Bacilli|Lactobacillales|Streptococcaceae|Streptococcus|Streptococcus agalactiae	Bacteria	Lactobacillales	Streptococcus agalactiae MRI Z1-200§taxonomy:1154837	Firmicutes	Streptococcus agalactiae	MRI Z1-200	0	0	252	2069	0.121798	MarDB
GCF_003674745.1	/data2/marine_genomes_and_metagenomes/genomes_The_MAR_databases/prodigal_short/Streptococcus/Streptococcus_iniae_QMA0222_GCF_003674745.1.fas	§insdc.gca:GCA_003674745.1	§mmp.db:MMP09104504	Bacilli	Streptococcaceae	§gtdb:GCF_001595425.1	Streptococcus	Bacteria|Firmicutes|Bacilli|Lactobacillales|Streptococcaceae|Streptococcus|Streptococcus iniae	Bacteria	Lactobacillales	Streptococcus iniae§taxonomy:1346	Firmicutes	Streptococcus iniae	QMA0222	0	0	203	1923	0.105564	MarDB
GCF_003674605.1	/data2/marine_genomes_and_metagenomes/genomes_The_MAR_databases/prodigal_short/Streptococcus/Streptococcus_iniae_QMA0246_GCF_003674605.1.fas	§insdc.gca:GCA_003674605.1	§mmp.db:MMP09104511	Bacilli	Streptococcaceae	§gtdb:GCF_001595425.1	Streptococcus	Bacteria|Firmicutes|Bacilli|Lactobacillales|Streptococcaceae|Streptococcus|Streptococcus iniae	Bacteria	Lactobacillales	Streptococcus iniae§taxonomy:1346	Firmicutes	Streptococcus iniae	QMA0246	0	0	204	1928	0.105809	MarDB
GCF_003174735.1	/data2/marine_genomes_and_metagenomes/genomes_The_MAR_databases/prodigal_short/Streptococcus/Streptococcus_agalactiae_QMA0320_GCF_003174735.1.fas	§insdc.gca:GCA_003174735.1	§mmp.db:MMP07998584	Bacilli	Streptococcaceae	§gtdb:GCF_000186445.1	Streptococcus	Bacteria|Firmicutes|Bacilli|Lactobacillales|Streptococcaceae|Streptococcus|Streptococcus agalactiae	Bacteria	Lactobacillales	Streptococcus agalactiae§taxonomy:1311	Firmicutes	Streptococcus agalactiae	QMA0320	0	0	236	2079	0.113516	MarDB
GCF_003674835.1	/data2/marine_genomes_and_metagenomes/genomes_The_MAR_databases/prodigal_short/Streptococcus/Streptococcus_iniae_QMA0207_GCF_003674835.1.fas	§insdc.gca:GCA_003674835.1	§mmp.db:MMP09104499	Bacilli	Streptococcaceae	§gtdb:GCF_001595425.1	Streptococcus	Bacteria|Firmicutes|Bacilli|Lactobacillales|Streptococcaceae|Streptococcus|Streptococcus iniae	Bacteria	Lactobacillales	Streptococcus iniae§taxonomy:1346	Firmicutes	Streptococcus iniae	QMA0207	0	0	200	1798	0.111235	MarDB
GCF_003674425.1	/data2/marine_genomes_and_metagenomes/genomes_The_MAR_databases/prodigal_short/Streptococcus/Streptococcus_iniae_QMA0373_GCF_003674425.1.fas	§insdc.gca:GCA_003674425.1	§mmp.db:MMP09104522	Bacilli	Streptococcaceae	§gtdb:GCF_001595425.1	Streptococcus	Bacteria|Firmicutes|Bacilli|Lactobacillales|Streptococcaceae|Streptococcus|Streptococcus iniae	Bacteria	Lactobacillales	Streptococcus iniae§taxonomy:1346	Firmicutes	Streptococcus iniae	QMA0373	0	0	193	1920	0.100521	MarDB
GCF_003674765.1	/data2/marine_genomes_and_metagenomes/genomes_The_MAR_databases/prodigal_short/Streptococcus/Streptococcus_iniae_QMA0221_GCF_003674765.1.fas	§insdc.gca:GCA_003674765.1	§mmp.db:MMP09104503	Bacilli	Streptococcaceae	§gtdb:GCF_001595425.1	Streptococcus	Bacteria|Firmicutes|Bacilli|Lactobacillales|Streptococcaceae|Streptococcus|Streptococcus iniae	Bacteria	Lactobacillales	Streptococcus iniae§taxonomy:1346	Firmicutes	Streptococcus iniae	QMA0221	0	0	207	1927	0.107421	MarDB
GCF_003967135.1	/data2/marine_genomes_and_metagenomes/genomes_The_MAR_databases/prodigal_short/Streptococcus/Streptococcus_dysgalactiae_Kdys0611_GCF_003967135.1.fas	§insdc.gca:GCA_003967135.1	§mmp.db:MMP00051096	Bacilli	Streptococcaceae	§gtdb:GCF_000188315.1	Streptococcus	Bacteria|Firmicutes|Bacilli|Lactobacillales|Streptococcaceae|Streptococcus|Streptococcus dysgalactiae	Bacteria	Lactobacillales	Streptococcus dysgalactiae§taxonomy:1334	Firmicutes	Streptococcus dysgalactiae	Kdys0611	0	0	263	2202	0.119437	MarDB
GCF_003697465.1	/data2/marine_genomes_and_metagenomes/genomes_The_MAR_databases/prodigal_short/Streptococcus/Streptococcus_iniae_QMA0160_GCF_003697465.1.fas	§insdc.gca:GCA_003697465.1	§mmp.db:MMP09104485	Bacilli	Streptococcaceae	§gtdb:GCF_001595425.1	Streptococcus	Bacteria|Firmicutes|Bacilli|Lactobacillales|Streptococcaceae|Streptococcus|Streptococcus iniae	Bacteria	Lactobacillales	Streptococcus iniae§taxonomy:1346	Firmicutes	Streptococcus iniae	QMA0160	0	0	199	1922	0.103538	MarDB
GCF_000323045.1	/data2/marine_genomes_and_metagenomes/genomes_The_MAR_databases/prodigal_short/Streptococcus/Streptococcus_agalactiae_STIR-CD-01_GCF_000323045.1.fas	§insdc.gca:GCA_000323045.1	§mmp.db:MMP02436257	Bacilli	Streptococcaceae	§gtdb:GCF_000186445.1	Streptococcus	Bacteria|Firmicutes|Bacilli|Lactobacillales|Streptococcaceae|Streptococcus|Streptococcus agalactiae	Bacteria	Lactobacillales	Streptococcus agalactiae STIR-CD-01§taxonomy:1154844	Firmicutes	Streptococcus agalactiae	STIR-CD-01	0	0	269	2052	0.131092	MarDB
GCF_003674685.1	/data2/marine_genomes_and_metagenomes/genomes_The_MAR_databases/prodigal_short/Streptococcus/Streptococcus_iniae_QMA0235_GCF_003674685.1.fas	§insdc.gca:GCA_003674685.1	§mmp.db:MMP09104507	Bacilli	Streptococcaceae	§gtdb:GCF_001595425.1	Streptococcus	Bacteria|Firmicutes|Bacilli|Lactobacillales|Streptococcaceae|Streptococcus|Streptococcus iniae	Bacteria	Lactobacillales	Streptococcus iniae§taxonomy:1346	Firmicutes	Streptococcus iniae	QMA0235	0	0	213	1998	0.106607	MarDB
GCF_003674265.1	/data2/marine_genomes_and_metagenomes/genomes_The_MAR_databases/prodigal_short/Streptococcus/Streptococcus_iniae_QMA0462_GCF_003674265.1.fas	§insdc.gca:GCA_003674265.1	§mmp.db:MMP09104530	Bacilli	Streptococcaceae	§gtdb:GCF_001595425.1	Streptococcus	Bacteria|Firmicutes|Bacilli|Lactobacillales|Streptococcaceae|Streptococcus|Streptococcus iniae	Bacteria	Lactobacillales	Streptococcus iniae§taxonomy:1346	Firmicutes	Streptococcus iniae	QMA0462	0	0	214	1940	0.110309	MarDB
GCF_003160735.1	/data2/marine_genomes_and_metagenomes/genomes_The_MAR_databases/prodigal_short/Streptococcus/Streptococcus_agalactiae_SBVN_GCF_003160735.1.fas	§insdc.gca:GCA_003160735.1	§mmp.db:MMP09005652	Bacilli	Streptococcaceae	§gtdb:GCF_000186445.1	Streptococcus	Bacteria|Firmicutes|Bacilli|Lactobacillales|Streptococcaceae|Streptococcus|Streptococcus agalactiae	Bacteria	Lactobacillales	Streptococcus agalactiae§taxonomy:1311	Firmicutes	Streptococcus agalactiae	SBVN	0	0	244	2068	0.117988	MarDB
GCF_003674465.1	/data2/marine_genomes_and_metagenomes/genomes_The_MAR_databases/prodigal_short/Streptococcus/Streptococcus_iniae_QMA0252_GCF_003674465.1.fas	§insdc.gca:GCA_003674465.1	§mmp.db:MMP09104517	Bacilli	Streptococcaceae	§gtdb:GCF_001595425.1	Streptococcus	Bacteria|Firmicutes|Bacilli|Lactobacillales|Streptococcaceae|Streptococcus|Streptococcus iniae	Bacteria	Lactobacillales	Streptococcus iniae§taxonomy:1346	Firmicutes	Streptococcus iniae	QMA0252	0	0	197	1867	0.105517	MarDB
GCF_003697405.1	/data2/marine_genomes_and_metagenomes/genomes_The_MAR_databases/prodigal_short/Streptococcus/Streptococcus_iniae_QMA0161_GCF_003697405.1.fas	§insdc.gca:GCA_003697405.1	§mmp.db:MMP09104486	Bacilli	Streptococcaceae	§gtdb:GCF_001595425.1	Streptococcus	Bacteria|Firmicutes|Bacilli|Lactobacillales|Streptococcaceae|Streptococcus|Streptococcus iniae	Bacteria	Lactobacillales	Streptococcus iniae§taxonomy:1346	Firmicutes	Streptococcus iniae	QMA0161	0	0	210	1930	0.108808	MarDB
GCF_003697525.1	/data2/marine_genomes_and_metagenomes/genomes_The_MAR_databases/prodigal_short/Streptococcus/Streptococcus_iniae_QMA0158_GCF_003697525.1.fas	§insdc.gca:GCA_003697525.1	§mmp.db:MMP09104483	Bacilli	Streptococcaceae	§gtdb:GCF_001595425.1	Streptococcus	Bacteria|Firmicutes|Bacilli|Lactobacillales|Streptococcaceae|Streptococcus|Streptococcus iniae	Bacteria	Lactobacillales	Streptococcus iniae§taxonomy:1346	Firmicutes	Streptococcus iniae	QMA0158	0	0	204	1925	0.105974	MarDB
GCF_003675045.1	/data2/marine_genomes_and_metagenomes/genomes_The_MAR_databases/prodigal_short/Streptococcus/Streptococcus_iniae_QMA0164_GCF_003675045.1.fas	§insdc.gca:GCA_003675045.1	§mmp.db:MMP09104489	Bacilli	Streptococcaceae	§gtdb:GCF_001595425.1	Streptococcus	Bacteria|Firmicutes|Bacilli|Lactobacillales|Streptococcaceae|Streptococcus|Streptococcus iniae	Bacteria	Lactobacillales	Streptococcus iniae§taxonomy:1346	Firmicutes	Streptococcus iniae	QMA0164	0	0	198	1905	0.103937	MarDB
GCF_001601885.1	/data2/marine_genomes_and_metagenomes/genomes_The_MAR_databases/prodigal_short/Streptococcus/Streptococcus_parauberis_N11_GCF_001601885.1.fas	§insdc.gca:GCA_001601885.1	§mmp.db:MMP03322817	Bacilli	Streptococcaceae	§gtdb:GCF_000187935.1	Streptococcus	Bacteria|Firmicutes|Bacilli|Lactobacillales|Streptococcaceae|Streptococcus|Streptococcus parauberis	Bacteria	Lactobacillales	Streptococcus parauberis§taxonomy:1348	Firmicutes	Unclassified	N11	0	0	224	2036	0.11002	MarDB
GCF_003674525.1	/data2/marine_genomes_and_metagenomes/genomes_The_MAR_databases/prodigal_short/Streptococcus/Streptococcus_iniae_QMA0251_GCF_003674525.1.fas	§insdc.gca:GCA_003674525.1	§mmp.db:MMP09104516	Bacilli	Streptococcaceae	§gtdb:GCF_001595425.1	Streptococcus	Bacteria|Firmicutes|Bacilli|Lactobacillales|Streptococcaceae|Streptococcus|Streptococcus iniae	Bacteria	Lactobacillales	Streptococcus iniae§taxonomy:1346	Firmicutes	Streptococcus iniae	QMA0251	0	0	197	1867	0.105517	MarDB
GCF_003697615.1	/data2/marine_genomes_and_metagenomes/genomes_The_MAR_databases/prodigal_short/Streptococcus/Streptococcus_iniae_QMA0150_GCF_003697615.1.fas	§insdc.gca:GCA_003697615.1	§mmp.db:MMP09104479	Bacilli	Streptococcaceae	§gtdb:GCF_001595425.1	Streptococcus	Bacteria|Firmicutes|Bacilli|Lactobacillales|Streptococcaceae|Streptococcus|Streptococcus iniae	Bacteria	Lactobacillales	Streptococcus iniae§taxonomy:1346	Firmicutes	Streptococcus iniae	QMA0150	0	0	197	1798	0.109566	MarDB
GCF_003674875.1	/data2/marine_genomes_and_metagenomes/genomes_The_MAR_databases/prodigal_short/Streptococcus/Streptococcus_iniae_QMA0189_GCF_003674875.1.fas	§insdc.gca:GCA_003674875.1	§mmp.db:MMP09104496	Bacilli	Streptococcaceae	§gtdb:GCF_001595425.1	Streptococcus	Bacteria|Firmicutes|Bacilli|Lactobacillales|Streptococcaceae|Streptococcus|Streptococcus iniae	Bacteria	Lactobacillales	Streptococcus iniae§taxonomy:1346	Firmicutes	Streptococcus iniae	QMA0189	0	0	202	1801	0.11216	MarDB
GCF_001601935.1	/data2/marine_genomes_and_metagenomes/genomes_The_MAR_databases/prodigal_short/Streptococcus/Streptococcus_parauberis_PL9_GCF_001601935.1.fas	§insdc.gca:GCA_001601935.1	§mmp.db:MMP03299889	Bacilli	Streptococcaceae	§gtdb:GCF_000187935.1	Streptococcus	Bacteria|Firmicutes|Bacilli|Lactobacillales|Streptococcaceae|Streptococcus|Streptococcus parauberis	Bacteria	Lactobacillales	Streptococcus parauberis§taxonomy:1348	Firmicutes	Unclassified	PL9	0	0	233	2058	0.113217	MarDB
GCF_001601965.1	/data2/marine_genomes_and_metagenomes/genomes_The_MAR_databases/prodigal_short/Streptococcus/Streptococcus_parauberis_RP15_GCF_001601965.1.fas	§insdc.gca:GCA_001601965.1	§mmp.db:MMP03956445	Bacilli	Streptococcaceae	§gtdb:GCF_000187935.1	Streptococcus	Bacteria|Firmicutes|Bacilli|Lactobacillales|Streptococcaceae|Streptococcus|Streptococcus parauberis	Bacteria	Lactobacillales	Streptococcus parauberis§taxonomy:1348	Firmicutes	Unclassified	RP15	0	0	239	2053	0.116415	MarDB
GCF_003697585.1	/data2/marine_genomes_and_metagenomes/genomes_The_MAR_databases/prodigal_short/Streptococcus/Streptococcus_iniae_QMA0155_GCF_003697585.1.fas	§insdc.gca:GCA_003697585.1	§mmp.db:MMP09104480	Bacilli	Streptococcaceae	§gtdb:GCF_001595425.1	Streptococcus	Bacteria|Firmicutes|Bacilli|Lactobacillales|Streptococcaceae|Streptococcus|Streptococcus iniae	Bacteria	Lactobacillales	Streptococcus iniae§taxonomy:1346	Firmicutes	Streptococcus iniae	QMA0155	0	0	218	1932	0.112836	MarDB
GCF_003674475.1	/data2/marine_genomes_and_metagenomes/genomes_The_MAR_databases/prodigal_short/Streptococcus/Streptococcus_iniae_QMA0254_GCF_003674475.1.fas	§insdc.gca:GCA_003674475.1	§mmp.db:MMP09104519	Bacilli	Streptococcaceae	§gtdb:GCF_001595425.1	Streptococcus	Bacteria|Firmicutes|Bacilli|Lactobacillales|Streptococcaceae|Streptococcus|Streptococcus iniae	Bacteria	Lactobacillales	Streptococcus iniae§taxonomy:1346	Firmicutes	Streptococcus iniae	QMA0254	0	0	211	1998	0.105606	MarDB
GCF_003675185.1	/data2/marine_genomes_and_metagenomes/genomes_The_MAR_databases/prodigal_short/Streptococcus/Streptococcus_iniae_QMA0082_GCF_003675185.1.fas	§insdc.gca:GCA_003675185.1	§mmp.db:MMP09104464	Bacilli	Streptococcaceae	§gtdb:GCF_001595425.1	Streptococcus	Bacteria|Firmicutes|Bacilli|Lactobacillales|Streptococcaceae|Streptococcus|Streptococcus iniae	Bacteria	Lactobacillales	Streptococcus iniae§taxonomy:1346	Firmicutes	Streptococcus iniae	QMA0082	0	0	230	1920	0.119792	MarDB
GCF_003675245.1	/data2/marine_genomes_and_metagenomes/genomes_The_MAR_databases/prodigal_short/Streptococcus/Streptococcus_iniae_QMA0071_GCF_003675245.1.fas	§insdc.gca:GCA_003675245.1	§mmp.db:MMP09104459	Bacilli	Streptococcaceae	§gtdb:GCF_001595425.1	Streptococcus	Bacteria|Firmicutes|Bacilli|Lactobacillales|Streptococcaceae|Streptococcus|Streptococcus iniae	Bacteria	Lactobacillales	Streptococcus iniae§taxonomy:1346	Firmicutes	Streptococcus iniae	QMA0071	0	0	199	1869	0.106474	MarDB
GCF_003674705.1	/data2/marine_genomes_and_metagenomes/genomes_The_MAR_databases/prodigal_short/Streptococcus/Streptococcus_iniae_QMA0234_GCF_003674705.1.fas	§insdc.gca:GCA_003674705.1	§mmp.db:MMP09104506	Bacilli	Streptococcaceae	§gtdb:GCF_001595425.1	Streptococcus	Bacteria|Firmicutes|Bacilli|Lactobacillales|Streptococcaceae|Streptococcus|Streptococcus iniae	Bacteria	Lactobacillales	Streptococcus iniae§taxonomy:1346	Firmicutes	Streptococcus iniae	QMA0234	0	0	209	2001	0.104448	MarDB
GCF_003697435.1	/data2/marine_genomes_and_metagenomes/genomes_The_MAR_databases/prodigal_short/Streptococcus/Streptococcus_iniae_QMA0162_GCF_003697435.1.fas	§insdc.gca:GCA_003697435.1	§mmp.db:MMP09104487	Bacilli	Streptococcaceae	§gtdb:GCF_001595425.1	Streptococcus	Bacteria|Firmicutes|Bacilli|Lactobacillales|Streptococcaceae|Streptococcus|Streptococcus iniae	Bacteria	Lactobacillales	Streptococcus iniae§taxonomy:1346	Firmicutes	Streptococcus iniae	QMA0162	0	0	204	1926	0.105919	MarDB
GCF_003674505.1	/data2/marine_genomes_and_metagenomes/genomes_The_MAR_databases/prodigal_short/Streptococcus/Streptococcus_iniae_QMA0253_GCF_003674505.1.fas	§insdc.gca:GCA_003674505.1	§mmp.db:MMP09104518	Bacilli	Streptococcaceae	§gtdb:GCF_001595425.1	Streptococcus	Bacteria|Firmicutes|Bacilli|Lactobacillales|Streptococcaceae|Streptococcus|Streptococcus iniae	Bacteria	Lactobacillales	Streptococcus iniae§taxonomy:1346	Firmicutes	Streptococcus iniae	QMA0253	0	0	213	1996	0.106713	MarDB
GCF_003674565.1	/data2/marine_genomes_and_metagenomes/genomes_The_MAR_databases/prodigal_short/Streptococcus/Streptococcus_iniae_QMA0249_GCF_003674565.1.fas	§insdc.gca:GCA_003674565.1	§mmp.db:MMP09104514	Bacilli	Streptococcaceae	§gtdb:GCF_001595425.1	Streptococcus	Bacteria|Firmicutes|Bacilli|Lactobacillales|Streptococcaceae|Streptococcus|Streptococcus iniae	Bacteria	Lactobacillales	Streptococcus iniae§taxonomy:1346	Firmicutes	Streptococcus iniae	QMA0249	0	0	211	1989	0.106083	MarDB
GCF_003675195.1	/data2/marine_genomes_and_metagenomes/genomes_The_MAR_databases/prodigal_short/Streptococcus/Streptococcus_iniae_QMA0080_GCF_003675195.1.fas	§insdc.gca:GCA_003675195.1	§mmp.db:MMP09104463	Bacilli	Streptococcaceae	§gtdb:GCF_001595425.1	Streptococcus	Bacteria|Firmicutes|Bacilli|Lactobacillales|Streptococcaceae|Streptococcus|Streptococcus iniae	Bacteria	Lactobacillales	Streptococcus iniae§taxonomy:1346	Firmicutes	Streptococcus iniae	QMA0080	0	0	212	1894	0.111932	MarDB
GCF_003674825.1	/data2/marine_genomes_and_metagenomes/genomes_The_MAR_databases/prodigal_short/Streptococcus/Streptococcus_iniae_QMA0216_GCF_003674825.1.fas	§insdc.gca:GCA_003674825.1	§mmp.db:MMP09104500	Bacilli	Streptococcaceae	§gtdb:GCF_001595425.1	Streptococcus	Bacteria|Firmicutes|Bacilli|Lactobacillales|Streptococcaceae|Streptococcus|Streptococcus iniae	Bacteria	Lactobacillales	Streptococcus iniae§taxonomy:1346	Firmicutes	Streptococcus iniae	QMA0216	0	0	206	1883	0.1094	MarDB
GCF_000187935.1	/data2/marine_genomes_and_metagenomes/genomes_The_MAR_databases/prodigal_short/Streptococcus/Streptococcus_parauberis_NCFD_2020_GCF_000187935.1.fas	§insdc.gca:GCA_000187935.2	§mmp.db:MMP02436555	Bacilli	Streptococcaceae	§gtdb:GCF_000187935.1	Streptococcus	Bacteria|Firmicutes|Bacilli|Lactobacillales|Streptococcaceae|Streptococcus|Streptococcus parauberis	Bacteria	Lactobacillales	Streptococcus parauberis NCFD 2020§taxonomy:873447	Firmicutes	Streptococcus parauberis	NCFD 2020	0	0	229	2141	0.106959	MarDB
GCF_003674545.1	/data2/marine_genomes_and_metagenomes/genomes_The_MAR_databases/prodigal_short/Streptococcus/Streptococcus_iniae_QMA0250_GCF_003674545.1.fas	§insdc.gca:GCA_003674545.1	§mmp.db:MMP09104515	Bacilli	Streptococcaceae	§gtdb:GCF_001595425.1	Streptococcus	Bacteria|Firmicutes|Bacilli|Lactobacillales|Streptococcaceae|Streptococcus|Streptococcus iniae	Bacteria	Lactobacillales	Streptococcus iniae§taxonomy:1346	Firmicutes	Streptococcus iniae	QMA0250	0	0	217	1937	0.112029	MarDB
GCF_003674615.1	/data2/marine_genomes_and_metagenomes/genomes_The_MAR_databases/prodigal_short/Streptococcus/Streptococcus_iniae_QMA0245_GCF_003674615.1.fas	§insdc.gca:GCA_003674615.1	§mmp.db:MMP09104510	Bacilli	Streptococcaceae	§gtdb:GCF_001595425.1	Streptococcus	Bacteria|Firmicutes|Bacilli|Lactobacillales|Streptococcaceae|Streptococcus|Streptococcus iniae	Bacteria	Lactobacillales	Streptococcus iniae§taxonomy:1346	Firmicutes	Streptococcus iniae	QMA0245	0	0	206	1925	0.107013	MarDB
GCF_001302265.1	/data2/marine_genomes_and_metagenomes/genomes_The_MAR_databases/prodigal_short/Streptococcus/Streptococcus_phocae_ATCC_51973_GCF_001302265.1.fas	§insdc.gca:GCA_001302265.1	§mmp.db:MMP03955537	Bacilli	Streptococcaceae	§gtdb:GCF_001302265.1	Streptococcus	Bacteria|Firmicutes|Bacilli|Lactobacillales|Streptococcaceae|Streptococcus|Streptococcus phocae	Bacteria	Lactobacillales	Streptococcus phocae§taxonomy:119224	Firmicutes	Unclassified	8399H1|SVL 8399 H1	0	0	231	1724	0.133991	MarDB
GCF_002220115.1	/data2/marine_genomes_and_metagenomes/genomes_The_MAR_databases/prodigal_short/Streptococcus/Streptococcus_iniae_QMA0248_GCF_002220115.1.fas	§insdc.gca:GCA_002220115.1	§mmp.ref:MMP06909305	Bacilli	Streptococcaceae	§gtdb:GCF_001595425.1	Streptococcus	Bacteria|Firmicutes|Bacilli|Lactobacillales|Streptococcaceae|Streptococcus|Streptococcus iniae	Bacteria	Lactobacillales	Streptococcus iniae§taxonomy:1346	Firmicutes	Unclassified	QMA0248	0	0	219	2015	0.108685	MarRef
GCF_003674585.1	/data2/marine_genomes_and_metagenomes/genomes_The_MAR_databases/prodigal_short/Streptococcus/Streptococcus_iniae_QMA0247_GCF_003674585.1.fas	§insdc.gca:GCA_003674585.1	§mmp.db:MMP09104512	Bacilli	Streptococcaceae	§gtdb:GCF_001595425.1	Streptococcus	Bacteria|Firmicutes|Bacilli|Lactobacillales|Streptococcaceae|Streptococcus|Streptococcus iniae	Bacteria	Lactobacillales	Streptococcus iniae§taxonomy:1346	Firmicutes	Streptococcus iniae	QMA0247	0	0	203	1924	0.105509	MarDB
GCF_000310665.1	/data2/marine_genomes_and_metagenomes/genomes_The_MAR_databases/prodigal_short/Streptococcus/Streptococcus_agalactiae_MRI_Z1-199_GCF_000310665.1.fas	§insdc.gca:GCA_000310665.1	§mmp.db:MMP00993455	Bacilli	Streptococcaceae	§gtdb:GCF_000186445.1	Streptococcus	Bacteria|Firmicutes|Bacilli|Lactobacillales|Streptococcaceae|Streptococcus|Streptococcus agalactiae	Bacteria	Lactobacillales	Streptococcus agalactiae MRI Z1-199§taxonomy:1154836	Firmicutes	Streptococcus agalactiae	MRI Z1-199	0	0	251	2022	0.124135	MarDB
GCF_002012365.1	/data2/marine_genomes_and_metagenomes/genomes_The_MAR_databases/prodigal_short/Streptococcus/Streptococcus_thermophilus_APC151_GCF_002012365.1.fas	§insdc.gca:GCA_002012365.1	§mmp.ref:MMP06349996	Bacilli	Streptococcaceae	§gtdb:GCF_000014485.1	Streptococcus	Bacteria|Firmicutes|Bacilli|Lactobacillales|Streptococcaceae|Streptococcus|Streptococcus thermophilus	Bacteria	Lactobacillales	Streptococcus thermophilus§taxonomy:1308	Firmicutes	Unclassified	APC151	0	0	383	1972	0.194219	MarRef
GCF_003674985.1	/data2/marine_genomes_and_metagenomes/genomes_The_MAR_databases/prodigal_short/Streptococcus/Streptococcus_iniae_QMA0177_GCF_003674985.1.fas	§insdc.gca:GCA_003674985.1	§mmp.db:MMP09104491	Bacilli	Streptococcaceae	§gtdb:GCF_001595425.1	Streptococcus	Bacteria|Firmicutes|Bacilli|Lactobacillales|Streptococcaceae|Streptococcus|Streptococcus iniae	Bacteria	Lactobacillales	Streptococcus iniae§taxonomy:1346	Firmicutes	Streptococcus iniae	QMA0177	0	0	201	1802	0.111543	MarDB
GCF_002887775.1	/data2/marine_genomes_and_metagenomes/genomes_The_MAR_databases/prodigal_short/Streptococcus/Streptococcus_penaeicida_CAIM_1838_GCF_002887775.1.fas	§insdc.gca:GCA_002887775.1	§mmp.db:MMP04311937	Bacilli	Streptococcaceae	§gtdb:GCF_002887775.1	Streptococcus	Bacteria|Firmicutes|Bacilli|Lactobacillales|Streptococcaceae|Streptococcus|Streptococcus penaeicida	Bacteria	Lactobacillales	Streptococcus penaeicida§taxonomy:1765960	Firmicutes	Streptococcus penaeicida	CAIM 1838	0	0	349	2163	0.16135	MarDB
GCF_000342505.1	/data2/marine_genomes_and_metagenomes/genomes_The_MAR_databases/prodigal_short/Streptococcus/Streptococcus_parauberis_KRS-02109_GCF_000342505.1.fas	§insdc.gca:GCA_000342505.1	§mmp.db:MMP02469869	Bacilli	Streptococcaceae	§gtdb:GCF_000187935.1	Streptococcus	Bacteria|Firmicutes|Bacilli|Lactobacillales|Streptococcaceae|Streptococcus|Streptococcus parauberis	Bacteria	Lactobacillales	Streptococcus parauberis KRS-02109§taxonomy:1207544	Firmicutes	Streptococcus parauberis	KRS-02109	0	0	240	2028	0.118343	MarDB
GCF_003674435.1	/data2/marine_genomes_and_metagenomes/genomes_The_MAR_databases/prodigal_short/Streptococcus/Streptococcus_iniae_QMA0258_GCF_003674435.1.fas	§insdc.gca:GCA_003674435.1	§mmp.db:MMP09104520	Bacilli	Streptococcaceae	§gtdb:GCF_001595425.1	Streptococcus	Bacteria|Firmicutes|Bacilli|Lactobacillales|Streptococcaceae|Streptococcus|Streptococcus iniae	Bacteria	Lactobacillales	Streptococcus iniae§taxonomy:1346	Firmicutes	Streptococcus iniae	QMA0258	0	0	205	1884	0.108811	MarDB
GCF_001601995.1	/data2/marine_genomes_and_metagenomes/genomes_The_MAR_databases/prodigal_short/Streptococcus/Streptococcus_parauberis_RP25_GCF_001601995.1.fas	§insdc.gca:GCA_001601995.1	§mmp.db:MMP03956446	Bacilli	Streptococcaceae	§gtdb:GCF_000187935.1	Streptococcus	Bacteria|Firmicutes|Bacilli|Lactobacillales|Streptococcaceae|Streptococcus|Streptococcus parauberis	Bacteria	Lactobacillales	Streptococcus parauberis§taxonomy:1348	Firmicutes	Unclassified	RP25	0	0	254	2073	0.122528	MarDB
GCF_000331915.1	/data2/marine_genomes_and_metagenomes/genomes_The_MAR_databases/prodigal_short/Streptococcus/Streptococcus_iniae_IUSA1_GCF_000331915.1.fas	§insdc.gca:GCA_000331915.2	§mmp.db:MMP02471473	Bacilli	Streptococcaceae	§gtdb:GCF_001595425.1	Streptococcus	Bacteria|Firmicutes|Bacilli|Lactobacillales|Streptococcaceae|Streptococcus|Streptococcus iniae	Bacteria	Lactobacillales	Streptococcus iniae IUSA1§taxonomy:1273539	Firmicutes	Streptococcus iniae	IUSA1	0	0	382	2313	0.165153	MarDB
GCF_003674995.1	/data2/marine_genomes_and_metagenomes/genomes_The_MAR_databases/prodigal_short/Streptococcus/Streptococcus_iniae_QMA0165_GCF_003674995.1.fas	§insdc.gca:GCA_003674995.1	§mmp.db:MMP09104490	Bacilli	Streptococcaceae	§gtdb:GCF_001595425.1	Streptococcus	Bacteria|Firmicutes|Bacilli|Lactobacillales|Streptococcaceae|Streptococcus|Streptococcus iniae	Bacteria	Lactobacillales	Streptococcus iniae§taxonomy:1346	Firmicutes	Streptococcus iniae	QMA0165	0	0	197	1906	0.103358	MarDB
GCF_000772915.1	/data2/marine_genomes_and_metagenomes/genomes_The_MAR_databases/prodigal_short/Streptococcus/Streptococcus_phocae_subsp._salmonis_C-4_GCF_000772915.1.fas	§insdc.gca:GCA_000772915.1	§mmp.db:MMP03114893	Bacilli	Streptococcaceae	§gtdb:GCF_001302265.1	Streptococcus	Bacteria|Firmicutes|Bacilli|Lactobacillales|Streptococcaceae|Streptococcus|Streptococcus phocae	Bacteria	Lactobacillales	Streptococcus phocae subsp. salmonis§taxonomy:1000562	Firmicutes	Streptococcus phocae	C-4	0	0	311	1761	0.176604	MarDB
GCF_000320965.2	/data2/marine_genomes_and_metagenomes/genomes_The_MAR_databases/prodigal_short/Streptococcus/Streptococcus_iniae_KCTC_11634BP_GCF_000320965.2.fas	§insdc.gca:GCA_000320965.2	§mmp.db:MMP00036648	Bacilli	Streptococcaceae	§gtdb:GCF_001595425.1	Streptococcus	Bacteria|Firmicutes|Bacilli|Lactobacillales|Streptococcaceae|Streptococcus|Streptococcus iniae	Bacteria	Lactobacillales	Streptococcus iniae KCTC 11634BP§taxonomy:1260129	Firmicutes	Streptococcus iniae	KCTC 11634BP	0	0	298	2002	0.148851	MarDB
GCF_000310645.1	/data2/marine_genomes_and_metagenomes/genomes_The_MAR_databases/prodigal_short/Streptococcus/Streptococcus_agalactiae_MRI_Z1-198_GCF_000310645.1.fas	§insdc.gca:GCA_000310645.1	§mmp.db:MMP00993779	Bacilli	Streptococcaceae	§gtdb:GCF_000186445.1	Streptococcus	Bacteria|Firmicutes|Bacilli|Lactobacillales|Streptococcaceae|Streptococcus|Streptococcus agalactiae	Bacteria	Lactobacillales	Streptococcus agalactiae MRI Z1-198§taxonomy:1154835	Firmicutes	Streptococcus agalactiae	MRI Z1-198	0	0	263	2048	0.128418	MarDB
GCF_002900385.1	/data2/marine_genomes_and_metagenomes/genomes_The_MAR_databases/prodigal_short/Streptococcus/Streptococcus_parauberis_SPOF3K_GCF_002900385.1.fas	§insdc.gca:GCA_002900385.1	§mmp.ref:MMP08180797	Bacilli	Streptococcaceae	§gtdb:GCF_000187935.1	Streptococcus	Bacteria|Firmicutes|Bacilli|Lactobacillales|Streptococcaceae|Streptococcus|Streptococcus parauberis	Bacteria	Lactobacillales	Streptococcus parauberis§taxonomy:1348	Firmicutes	Unclassified	SPOF3K	0	0	227	2152	0.105483	MarRef
GCF_000343855.1	/data2/marine_genomes_and_metagenomes/genomes_The_MAR_databases/prodigal_short/Streptococcus/Streptococcus_parauberis_KRS-02083_GCF_000343855.1.fas	§insdc.gca:GCA_000343855.1	§mmp.db:MMP02469868	Bacilli	Streptococcaceae	§gtdb:GCF_000187935.1	Streptococcus	Bacteria|Firmicutes|Bacilli|Lactobacillales|Streptococcaceae|Streptococcus|Streptococcus parauberis	Bacteria	Lactobacillales	Streptococcus parauberis KRS-02083§taxonomy:1207545	Firmicutes	Streptococcus parauberis	KRS-02083	0	0	243	2255	0.107761	MarDB
GCF_000380045.1	/data2/marine_genomes_and_metagenomes/genomes_The_MAR_databases/prodigal_short/Streptococcus/Streptococcus_marimammalium_DSM_18627_GCF_000380045.1.fas	§insdc.gca:GCA_000380045.1	§mmp.db:MMP02256437	Bacilli	Streptococcaceae	§gtdb:GCF_000380045.1	Streptococcus	Bacteria|Firmicutes|Bacilli|Lactobacillales|Streptococcaceae|Streptococcus|Streptococcus marimammalium	Bacteria	Lactobacillales	Streptococcus marimammalium DSM 18627§taxonomy:1123306	Firmicutes	Streptococcus marimammalium	M54/01/1	0	0	169	1441	0.11728	MarDB
GCF_003675225.1	/data2/marine_genomes_and_metagenomes/genomes_The_MAR_databases/prodigal_short/Streptococcus/Streptococcus_iniae_QMA0077_GCF_003675225.1.fas	§insdc.gca:GCA_003675225.1	§mmp.db:MMP09104461	Bacilli	Streptococcaceae	§gtdb:GCF_001595425.1	Streptococcus	Bacteria|Firmicutes|Bacilli|Lactobacillales|Streptococcaceae|Streptococcus|Streptococcus iniae	Bacteria	Lactobacillales	Streptococcus iniae§taxonomy:1346	Firmicutes	Streptococcus iniae	QMA0077	0	0	204	1912	0.106695	MarDB
GCF_003675025.1	/data2/marine_genomes_and_metagenomes/genomes_The_MAR_databases/prodigal_short/Streptococcus/Streptococcus_iniae_QMA0180_GCF_003675025.1.fas	§insdc.gca:GCA_003675025.1	§mmp.db:MMP09104492	Bacilli	Streptococcaceae	§gtdb:GCF_001595425.1	Streptococcus	Bacteria|Firmicutes|Bacilli|Lactobacillales|Streptococcaceae|Streptococcus|Streptococcus iniae	Bacteria	Lactobacillales	Streptococcus iniae§taxonomy:1346	Firmicutes	Streptococcus iniae	QMA0180	0	0	194	1795	0.108078	MarDB
GCF_003675265.1	/data2/marine_genomes_and_metagenomes/genomes_The_MAR_databases/prodigal_short/Streptococcus/Streptococcus_iniae_QMA0078_GCF_003675265.1.fas	§insdc.gca:GCA_003675265.1	§mmp.db:MMP09104462	Bacilli	Streptococcaceae	§gtdb:GCF_001595425.1	Streptococcus	Bacteria|Firmicutes|Bacilli|Lactobacillales|Streptococcaceae|Streptococcus|Streptococcus iniae	Bacteria	Lactobacillales	Streptococcus iniae§taxonomy:1346	Firmicutes	Streptococcus iniae	QMA0078	0	0	201	1869	0.107544	MarDB
GCF_003674215.1	/data2/marine_genomes_and_metagenomes/genomes_The_MAR_databases/prodigal_short/Streptococcus/Streptococcus_iniae_QMA0463_GCF_003674215.1.fas	§insdc.gca:GCA_003674215.1	§mmp.db:MMP09104531	Bacilli	Streptococcaceae	§gtdb:GCF_001595425.1	Streptococcus	Bacteria|Firmicutes|Bacilli|Lactobacillales|Streptococcaceae|Streptococcus|Streptococcus iniae	Bacteria	Lactobacillales	Streptococcus iniae§taxonomy:1346	Firmicutes	Streptococcus iniae	QMA0463	0	0	222	1905	0.116535	MarDB
GCF_003675055.1	/data2/marine_genomes_and_metagenomes/genomes_The_MAR_databases/prodigal_short/Streptococcus/Streptococcus_iniae_QMA0163_GCF_003675055.1.fas	§insdc.gca:GCA_003675055.1	§mmp.db:MMP09104488	Bacilli	Streptococcaceae	§gtdb:GCF_001595425.1	Streptococcus	Bacteria|Firmicutes|Bacilli|Lactobacillales|Streptococcaceae|Streptococcus|Streptococcus iniae	Bacteria	Lactobacillales	Streptococcus iniae§taxonomy:1346	Firmicutes	Streptococcus iniae	QMA0163	0	0	211	1932	0.109213	MarDB
GCF_003697485.1	/data2/marine_genomes_and_metagenomes/genomes_The_MAR_databases/prodigal_short/Streptococcus/Streptococcus_iniae_QMA0157_GCF_003697485.1.fas	§insdc.gca:GCA_003697485.1	§mmp.db:MMP09104482	Bacilli	Streptococcaceae	§gtdb:GCF_001595425.1	Streptococcus	Bacteria|Firmicutes|Bacilli|Lactobacillales|Streptococcaceae|Streptococcus|Streptococcus iniae	Bacteria	Lactobacillales	Streptococcus iniae§taxonomy:1346	Firmicutes	Streptococcus iniae	QMA0157	0	0	201	1928	0.104253	MarDB
GCF_003674315.1	/data2/marine_genomes_and_metagenomes/genomes_The_MAR_databases/prodigal_short/Streptococcus/Streptococcus_iniae_QMA0458_GCF_003674315.1.fas	§insdc.gca:GCA_003674315.1	§mmp.db:MMP09104529	Bacilli	Streptococcaceae	§gtdb:GCF_001595425.1	Streptococcus	Bacteria|Firmicutes|Bacilli|Lactobacillales|Streptococcaceae|Streptococcus|Streptococcus iniae	Bacteria	Lactobacillales	Streptococcus iniae§taxonomy:1346	Firmicutes	Streptococcus iniae	QMA0458	0	0	227	1932	0.117495	MarDB
GCF_000322545.1	/data2/marine_genomes_and_metagenomes/genomes_The_MAR_databases/prodigal_short/Streptococcus/Streptococcus_agalactiae_MRI_Z1-201_GCF_000322545.1.fas	§insdc.gca:GCA_000322545.1	§mmp.db:MMP02436251	Bacilli	Streptococcaceae	§gtdb:GCF_000186445.1	Streptococcus	Bacteria|Firmicutes|Bacilli|Lactobacillales|Streptococcaceae|Streptococcus|Streptococcus agalactiae	Bacteria	Lactobacillales	Streptococcus agalactiae MRI Z1-201§taxonomy:1154838	Firmicutes	Streptococcus agalactiae	MRI Z1-201	0	0	255	1988	0.12827	MarDB
GCF_001601975.1	/data2/marine_genomes_and_metagenomes/genomes_The_MAR_databases/prodigal_short/Streptococcus/Streptococcus_parauberis_RP17_GCF_001601975.1.fas	§insdc.gca:GCA_001601975.1	§mmp.db:MMP03299890	Bacilli	Streptococcaceae	§gtdb:GCF_000187935.1	Streptococcus	Bacteria|Firmicutes|Bacilli|Lactobacillales|Streptococcaceae|Streptococcus|Streptococcus parauberis	Bacteria	Lactobacillales	Streptococcus parauberis§taxonomy:1348	Firmicutes	Unclassified	RP17	0	0	239	2063	0.115851	MarDB
GCF_003674925.1	/data2/marine_genomes_and_metagenomes/genomes_The_MAR_databases/prodigal_short/Streptococcus/Streptococcus_iniae_QMA0188_GCF_003674925.1.fas	§insdc.gca:GCA_003674925.1	§mmp.db:MMP09104495	Bacilli	Streptococcaceae	§gtdb:GCF_001595425.1	Streptococcus	Bacteria|Firmicutes|Bacilli|Lactobacillales|Streptococcaceae|Streptococcus|Streptococcus iniae	Bacteria	Lactobacillales	Streptococcus iniae§taxonomy:1346	Firmicutes	Streptococcus iniae	QMA0188	0	0	195	1811	0.107675	MarDB
GCF_001601895.1	/data2/marine_genomes_and_metagenomes/genomes_The_MAR_databases/prodigal_short/Streptococcus/Streptococcus_parauberis_PL23_GCF_001601895.1.fas	§insdc.gca:GCA_001601895.1	§mmp.db:MMP03856836	Bacilli	Streptococcaceae	§gtdb:GCF_000187935.1	Streptococcus	Bacteria|Firmicutes|Bacilli|Lactobacillales|Streptococcaceae|Streptococcus|Streptococcus parauberis	Bacteria	Lactobacillales	Streptococcus parauberis§taxonomy:1348	Firmicutes	Unclassified	PL23	0	0	224	2053	0.109109	MarDB
GCF_000320985.2	/data2/marine_genomes_and_metagenomes/genomes_The_MAR_databases/prodigal_short/Streptococcus/Streptococcus_parauberis_KCTC_11980BP_GCF_000320985.2.fas	§insdc.gca:GCA_000320985.2	§mmp.db:MMP00036649	Bacilli	Streptococcaceae	§gtdb:GCF_000187935.1	Streptococcus	Bacteria|Firmicutes|Bacilli|Lactobacillales|Streptococcaceae|Streptococcus|Streptococcus parauberis	Bacteria	Lactobacillales	Streptococcus parauberis KCTC 11980BP§taxonomy:1260132	Firmicutes	Streptococcus parauberis	KCTC 11980BP	0	0	340	2258	0.150576	MarDB
GCF_003674785.1	/data2/marine_genomes_and_metagenomes/genomes_The_MAR_databases/prodigal_short/Streptococcus/Streptococcus_iniae_QMA0220_GCF_003674785.1.fas	§insdc.gca:GCA_003674785.1	§mmp.db:MMP09104502	Bacilli	Streptococcaceae	§gtdb:GCF_001595425.1	Streptococcus	Bacteria|Firmicutes|Bacilli|Lactobacillales|Streptococcaceae|Streptococcus|Streptococcus iniae	Bacteria	Lactobacillales	Streptococcus iniae§taxonomy:1346	Firmicutes	Streptococcus iniae	QMA0220	0	0	213	1934	0.110134	MarDB
GCF_003675095.1	/data2/marine_genomes_and_metagenomes/genomes_The_MAR_databases/prodigal_short/Streptococcus/Streptococcus_iniae_QMA0087_GCF_003675095.1.fas	§insdc.gca:GCA_003675095.1	§mmp.db:MMP09104467	Bacilli	Streptococcaceae	§gtdb:GCF_001595425.1	Streptococcus	Bacteria|Firmicutes|Bacilli|Lactobacillales|Streptococcaceae|Streptococcus|Streptococcus iniae	Bacteria	Lactobacillales	Streptococcus iniae§taxonomy:1346	Firmicutes	Streptococcus iniae	QMA0087	0	0	214	1930	0.110881	MarDB
GCF_001601925.1	/data2/marine_genomes_and_metagenomes/genomes_The_MAR_databases/prodigal_short/Streptococcus/Streptococcus_parauberis_N198_2_GCF_001601925.1.fas	§insdc.gca:GCA_001601925.1	§mmp.db:MMP03856837	Bacilli	Streptococcaceae	§gtdb:GCF_000187935.1	Streptococcus	Bacteria|Firmicutes|Bacilli|Lactobacillales|Streptococcaceae|Streptococcus|Streptococcus parauberis	Bacteria	Lactobacillales	Streptococcus parauberis§taxonomy:1348	Firmicutes	Unclassified	N198_2	0	0	217	1989	0.1091	MarDB
GCF_000322985.1	/data2/marine_genomes_and_metagenomes/genomes_The_MAR_databases/prodigal_short/Streptococcus/Streptococcus_agalactiae_MRI_Z1-202_GCF_000322985.1.fas	§insdc.gca:GCA_000322985.1	§mmp.db:MMP02436191	Bacilli	Streptococcaceae	§gtdb:GCF_000186445.1	Streptococcus	Bacteria|Firmicutes|Bacilli|Lactobacillales|Streptococcaceae|Streptococcus|Streptococcus agalactiae	Bacteria	Lactobacillales	Streptococcus agalactiae MRI Z1-202§taxonomy:1154839	Firmicutes	Streptococcus agalactiae	MRI Z1-202	0	0	239	1926	0.124091	MarDB
GCF_001983285.1	/data2/marine_genomes_and_metagenomes/genomes_The_MAR_databases/prodigal_short/Streptococcus/Streptococcus_parauberis_T1_GCF_001983285.1.fas	§insdc.gca:GCA_001983285.1	§mmp.db:MMP04231484	Bacilli	Streptococcaceae	§gtdb:GCF_000187935.1	Streptococcus	Bacteria|Firmicutes|Bacilli|Lactobacillales|Streptococcaceae|Streptococcus|Streptococcus parauberis	Bacteria	Lactobacillales	Streptococcus parauberis§taxonomy:1348	Firmicutes	Unclassified	T1	0	0	223	1992	0.111948	MarDB
GCF_003174715.1	/data2/marine_genomes_and_metagenomes/genomes_The_MAR_databases/prodigal_short/Streptococcus/Streptococcus_agalactiae_QMA0323_GCF_003174715.1.fas	§insdc.gca:GCA_003174715.1	§mmp.db:MMP07998586	Bacilli	Streptococcaceae	§gtdb:GCF_000186445.1	Streptococcus	Bacteria|Firmicutes|Bacilli|Lactobacillales|Streptococcaceae|Streptococcus|Streptococcus agalactiae	Bacteria	Lactobacillales	Streptococcus agalactiae§taxonomy:1311	Firmicutes	Streptococcus agalactiae	QMA0323	0	0	270	2189	0.123344	MarDB
GCF_003674645.1	/data2/marine_genomes_and_metagenomes/genomes_The_MAR_databases/prodigal_short/Streptococcus/Streptococcus_iniae_QMA0244_GCF_003674645.1.fas	§insdc.gca:GCA_003674645.1	§mmp.db:MMP09104509	Bacilli	Streptococcaceae	§gtdb:GCF_001595425.1	Streptococcus	Bacteria|Firmicutes|Bacilli|Lactobacillales|Streptococcaceae|Streptococcus|Streptococcus iniae	Bacteria	Lactobacillales	Streptococcus iniae§taxonomy:1346	Firmicutes	Streptococcus iniae	QMA0244	0	0	205	1930	0.106218	MarDB
GCF_003674945.1	/data2/marine_genomes_and_metagenomes/genomes_The_MAR_databases/prodigal_short/Streptococcus/Streptococcus_iniae_QMA0186_GCF_003674945.1.fas	§insdc.gca:GCA_003674945.1	§mmp.db:MMP09104493	Bacilli	Streptococcaceae	§gtdb:GCF_001595425.1	Streptococcus	Bacteria|Firmicutes|Bacilli|Lactobacillales|Streptococcaceae|Streptococcus|Streptococcus iniae	Bacteria	Lactobacillales	Streptococcus iniae§taxonomy:1346	Firmicutes	Streptococcus iniae	QMA0186	0	0	193	1810	0.10663	MarDB
GCF_003675155.1	/data2/marine_genomes_and_metagenomes/genomes_The_MAR_databases/prodigal_short/Streptococcus/Streptococcus_iniae_QMA0083_GCF_003675155.1.fas	§insdc.gca:GCA_003675155.1	§mmp.db:MMP09104465	Bacilli	Streptococcaceae	§gtdb:GCF_001595425.1	Streptococcus	Bacteria|Firmicutes|Bacilli|Lactobacillales|Streptococcaceae|Streptococcus|Streptococcus iniae	Bacteria	Lactobacillales	Streptococcus iniae§taxonomy:1346	Firmicutes	Streptococcus iniae	QMA0083	0	0	232	1994	0.116349	MarDB
GCF_001714245.1	/data2/marine_genomes_and_metagenomes/genomes_The_MAR_databases/prodigal_short/Salmonella/Salmonella_enterica_subsp._enterica_serovar_Enteritidis_GCF_001714245.1.fas	§insdc.gca:GCA_001714245.1	§mmp.db:MMP03079697	Gammaproteobacteria	Enterobacteriaceae	§gtdb:GCF_000006945.2	Salmonella	Bacteria|Proteobacteria|Gammaproteobacteria|Enterobacterales|Enterobacteriaceae|Salmonella|Salmonella enterica	Bacteria	Enterobacterales	Salmonella enterica subsp. enterica§taxonomy:59201	Proteobacteria	Salmonella enterica	CFSAN024752	0	0	436	4622	0.0943315	MarDB
GCF_001890845.1	/data2/marine_genomes_and_metagenomes/genomes_The_MAR_databases/prodigal_short/Salmonella/Salmonella_enterica_subsp._enterica_serovar_Kentucky_SAL2607_GCF_001890845.1.fas	§insdc.gca:GCA_001890845.1	§mmp.db:MMP05915003	Gammaproteobacteria	Enterobacteriaceae	§gtdb:GCF_000006945.2	Salmonella	Bacteria|Proteobacteria|Gammaproteobacteria|Enterobacterales|Enterobacteriaceae|Salmonella|Salmonella enterica	Bacteria	Enterobacterales	Salmonella enterica subsp. enterica serovar Kentucky§taxonomy:192955	Proteobacteria	Salmonella enterica	SAL2607	0	0	480	4967	0.0966378	MarDB
GCF_000487835.1	/data2/marine_genomes_and_metagenomes/genomes_The_MAR_databases/prodigal_short/Salmonella/Salmonella_enterica_subsp._enterica_serovar_Norwich_str._CFSAN001077_GCF_000487835.1.fas	§insdc.gca:GCA_000487835.1	§mmp.db:MMP01816343	Gammaproteobacteria	Enterobacteriaceae	§gtdb:GCF_000006945.2	Salmonella	Bacteria|Proteobacteria|Gammaproteobacteria|Enterobacterales|Enterobacteriaceae|Salmonella|Salmonella enterica	Bacteria	Enterobacterales	Salmonella enterica subsp. enterica serovar Norwich str. CFSAN001077§taxonomy:1194151	Proteobacteria	Salmonella enterica	CFSAN001077	0	0	553	4689	0.117936	MarDB
GCF_001714265.1	/data2/marine_genomes_and_metagenomes/genomes_The_MAR_databases/prodigal_short/Salmonella/Salmonella_enterica_subsp._enterica_serovar_Enteritidis_GCF_001714265.1.fas	§insdc.gca:GCA_001714265.1	§mmp.db:MMP03079698	Gammaproteobacteria	Enterobacteriaceae	§gtdb:GCF_000006945.2	Salmonella	Bacteria|Proteobacteria|Gammaproteobacteria|Enterobacterales|Enterobacteriaceae|Salmonella|Salmonella enterica	Bacteria	Enterobacterales	Salmonella enterica subsp. enterica§taxonomy:59201	Proteobacteria	Salmonella enterica	CFSAN024753	0	0	429	4615	0.0929577	MarDB
GCF_001714325.1	/data2/marine_genomes_and_metagenomes/genomes_The_MAR_databases/prodigal_short/Salmonella/Salmonella_enterica_subsp._enterica_serovar_Enteritidis_GCF_001714325.1.fas	§insdc.gca:GCA_001714325.1	§mmp.db:MMP03079700	Gammaproteobacteria	Enterobacteriaceae	§gtdb:GCF_000006945.2	Salmonella	Bacteria|Proteobacteria|Gammaproteobacteria|Enterobacterales|Enterobacteriaceae|Salmonella|Salmonella enterica	Bacteria	Enterobacterales	Salmonella enterica subsp. enterica§taxonomy:59201	Proteobacteria	Salmonella enterica	CFSAN024755	0	0	433	4621	0.0937027	MarDB
GCF_000748125.1	/data2/marine_genomes_and_metagenomes/genomes_The_MAR_databases/prodigal_short/Salmonella/Salmonella_enterica_subsp._enterica_serovar_Bareilly_str._CFSAN000195_GCF_000748125.1.fas	§insdc.gca:GCA_000748125.1	§mmp.db:MMP01942250	Gammaproteobacteria	Enterobacteriaceae	§gtdb:GCF_000006945.2	Salmonella	Bacteria|Proteobacteria|Gammaproteobacteria|Enterobacterales|Enterobacteriaceae|Salmonella|Salmonella enterica	Bacteria	Enterobacterales	Salmonella enterica subsp. enterica serovar Bareilly str. CFSAN000195§taxonomy:1173476	Proteobacteria	Salmonella enterica	CFSAN000195	0	0	575	4441	0.129475	MarDB
GCF_000748225.1	/data2/marine_genomes_and_metagenomes/genomes_The_MAR_databases/prodigal_short/Salmonella/Salmonella_enterica_subsp._enterica_serovar_Bareilly_str._CFSAN000202_GCF_000748225.1.fas	§insdc.gca:GCA_000748225.1	§mmp.db:MMP01942309	Gammaproteobacteria	Enterobacteriaceae	§gtdb:GCF_000006945.2	Salmonella	Bacteria|Proteobacteria|Gammaproteobacteria|Enterobacterales|Enterobacteriaceae|Salmonella|Salmonella enterica	Bacteria	Enterobacterales	Salmonella enterica subsp. enterica serovar Bareilly str. CFSAN000202§taxonomy:1173477	Proteobacteria	Salmonella enterica	CFSAN000202	0	0	418	4461	0.093701	MarDB
GCF_001714305.1	/data2/marine_genomes_and_metagenomes/genomes_The_MAR_databases/prodigal_short/Salmonella/Salmonella_enterica_subsp._enterica_serovar_Enteritidis_GCF_001714305.1.fas	§insdc.gca:GCA_001714305.1	§mmp.db:MMP03079699	Gammaproteobacteria	Enterobacteriaceae	§gtdb:GCF_000006945.2	Salmonella	Bacteria|Proteobacteria|Gammaproteobacteria|Enterobacterales|Enterobacteriaceae|Salmonella|Salmonella enterica	Bacteria	Enterobacterales	Salmonella enterica subsp. enterica§taxonomy:59201	Proteobacteria	Salmonella enterica	CFSAN024754	0	0	428	4611	0.0928215	MarDB
GCF_003186365.1	/data2/marine_genomes_and_metagenomes/genomes_The_MAR_databases/prodigal_short/Salmonella/Salmonella_enterica_subsp._enterica_serovar_Typhimurium_5129_18_GCF_003186365.1.fas	§insdc.gca:GCA_003186365.1	§mmp.db:MMP09246472	Gammaproteobacteria	Enterobacteriaceae	§gtdb:GCF_000006945.2	Salmonella	Bacteria|Proteobacteria|Gammaproteobacteria|Enterobacterales|Enterobacteriaceae|Salmonella|Salmonella enterica	Bacteria	Enterobacterales	Salmonella enterica subsp. enterica serovar Typhimurium§taxonomy:90371	Proteobacteria	Salmonella enterica	5129/18	0	0	491	4802	0.102249	MarDB
GCF_000487875.1	/data2/marine_genomes_and_metagenomes/genomes_The_MAR_databases/prodigal_short/Salmonella/Salmonella_enterica_subsp._enterica_serovar_Hartford_str._CFSAN001075_GCF_000487875.1.fas	§insdc.gca:GCA_000487875.1	§mmp.db:MMP01816341	Gammaproteobacteria	Enterobacteriaceae	§gtdb:GCF_000006945.2	Salmonella	Bacteria|Proteobacteria|Gammaproteobacteria|Enterobacterales|Enterobacteriaceae|Salmonella|Salmonella enterica	Bacteria	Enterobacterales	Salmonella enterica subsp. enterica serovar Hartford str. CFSAN001075§taxonomy:1194149	Proteobacteria	Salmonella enterica	CFSAN001075	0	0	458	4639	0.0987282	MarDB
GCF_003186325.1	/data2/marine_genomes_and_metagenomes/genomes_The_MAR_databases/prodigal_short/Salmonella/Salmonella_enterica_subsp._enterica_serovar_Typhimurium_11447_15_GCF_003186325.1.fas	§insdc.gca:GCA_003186325.1	§mmp.db:MMP09246470	Gammaproteobacteria	Enterobacteriaceae	§gtdb:GCF_000006945.2	Salmonella	Bacteria|Proteobacteria|Gammaproteobacteria|Enterobacterales|Enterobacteriaceae|Salmonella|Salmonella enterica	Bacteria	Enterobacterales	Salmonella enterica subsp. enterica serovar Typhimurium§taxonomy:90371	Proteobacteria	Salmonella enterica	11447/15	0	0	461	4662	0.0988846	MarDB
GCF_000806605.1	/data2/marine_genomes_and_metagenomes/genomes_The_MAR_databases/prodigal_short/Salmonella/Salmonella_enterica_subsp._enterica_serovar_Agona_CFSAN024761_GCF_000806605.1.fas	§insdc.gca:GCA_000806605.1	§mmp.db:MMP03079706	Gammaproteobacteria	Enterobacteriaceae	§gtdb:GCF_000006945.2	Salmonella	Bacteria|Proteobacteria|Gammaproteobacteria|Enterobacterales|Enterobacteriaceae|Salmonella|Salmonella enterica	Bacteria	Enterobacterales	Salmonella enterica subsp. enterica§taxonomy:59201	Proteobacteria	Salmonella enterica	CFSAN024761	0	0	436	4464	0.0976703	MarDB
GCF_001726095.1	/data2/marine_genomes_and_metagenomes/genomes_The_MAR_databases/prodigal_short/Salmonella/Salmonella_enterica_subsp._enterica_serovar_Anatum_CFSAN024762_GCF_001726095.1.fas	§insdc.gca:GCA_001726095.1	§mmp.db:MMP03079707	Gammaproteobacteria	Enterobacteriaceae	§gtdb:GCF_000006945.2	Salmonella	Bacteria|Proteobacteria|Gammaproteobacteria|Enterobacterales|Enterobacteriaceae|Salmonella|Salmonella enterica	Bacteria	Enterobacterales	Salmonella enterica subsp. enterica serovar Anatum§taxonomy:58712	Proteobacteria	Salmonella enterica	CFSAN024762	0	0	414	4585	0.0902944	MarDB
GCF_001714175.1	/data2/marine_genomes_and_metagenomes/genomes_The_MAR_databases/prodigal_short/Salmonella/Salmonella_enterica_subsp._enterica_serovar_Enteritidis_GCF_001714175.1.fas	§insdc.gca:GCA_001714175.1	§mmp.db:MMP03079694	Gammaproteobacteria	Enterobacteriaceae	§gtdb:GCF_000006945.2	Salmonella	Bacteria|Proteobacteria|Gammaproteobacteria|Enterobacterales|Enterobacteriaceae|Salmonella|Salmonella enterica	Bacteria	Enterobacterales	Salmonella enterica subsp. enterica§taxonomy:59201	Proteobacteria	Salmonella enterica	CFSAN024749	0	0	443	4632	0.095639	MarDB
GCF_000806885.1	/data2/marine_genomes_and_metagenomes/genomes_The_MAR_databases/prodigal_short/Salmonella/Salmonella_enterica_subsp._enterica_serovar_Agona_CFSAN024756_GCF_000806885.1.fas	§insdc.gca:GCA_000806885.1	§mmp.db:MMP03079701	Gammaproteobacteria	Enterobacteriaceae	§gtdb:GCF_000006945.2	Salmonella	Bacteria|Proteobacteria|Gammaproteobacteria|Enterobacterales|Enterobacteriaceae|Salmonella|Salmonella enterica	Bacteria	Enterobacterales	Salmonella enterica subsp. enterica§taxonomy:59201	Proteobacteria	Salmonella enterica	CFSAN024756	0	0	439	4471	0.0981883	MarDB
GCF_001758445.1	/data2/marine_genomes_and_metagenomes/genomes_The_MAR_databases/prodigal_short/Salmonella/Salmonella_enterica_subsp._enterica_serovar_Typhimurium_TT9097_GCF_001758445.1.fas	§insdc.gca:GCA_001758445.1	§mmp.db:MMP05462047	Gammaproteobacteria	Enterobacteriaceae	§gtdb:GCF_000006945.2	Salmonella	Bacteria|Proteobacteria|Gammaproteobacteria|Enterobacterales|Enterobacteriaceae|Salmonella|Salmonella enterica	Bacteria	Enterobacterales	Salmonella enterica subsp. enterica serovar Typhimurium§taxonomy:90371	Proteobacteria	Salmonella enterica	TT9097	0	0	468	4625	0.101189	MarDB
GCF_001714145.1	/data2/marine_genomes_and_metagenomes/genomes_The_MAR_databases/prodigal_short/Salmonella/Salmonella_enterica_subsp._enterica_serovar_Enteritidis_GCF_001714145.1.fas	§insdc.gca:GCA_001714145.1	§mmp.db:MMP03079691	Gammaproteobacteria	Enterobacteriaceae	§gtdb:GCF_000006945.2	Salmonella	Bacteria|Proteobacteria|Gammaproteobacteria|Enterobacterales|Enterobacteriaceae|Salmonella|Salmonella enterica	Bacteria	Enterobacterales	Salmonella enterica subsp. enterica§taxonomy:59201	Proteobacteria	Salmonella enterica	CFSAN024746	0	0	429	4525	0.0948066	MarDB
GCF_001714165.1	/data2/marine_genomes_and_metagenomes/genomes_The_MAR_databases/prodigal_short/Salmonella/Salmonella_enterica_subsp._enterica_serovar_Enteritidis_GCF_001714165.1.fas	§insdc.gca:GCA_001714165.1	§mmp.db:MMP03079692	Gammaproteobacteria	Enterobacteriaceae	§gtdb:GCF_000006945.2	Salmonella	Bacteria|Proteobacteria|Gammaproteobacteria|Enterobacterales|Enterobacteriaceae|Salmonella|Salmonella enterica	Bacteria	Enterobacterales	Salmonella enterica subsp. enterica§taxonomy:59201	Proteobacteria	Salmonella enterica	CFSAN024747	0	0	433	4624	0.0936419	MarDB
GCF_000806565.1	/data2/marine_genomes_and_metagenomes/genomes_The_MAR_databases/prodigal_short/Salmonella/Salmonella_enterica_subsp._enterica_serovar_Agona_CFSAN024758_GCF_000806565.1.fas	§insdc.gca:GCA_000806565.1	§mmp.db:MMP03079703	Gammaproteobacteria	Enterobacteriaceae	§gtdb:GCF_000006945.2	Salmonella	Bacteria|Proteobacteria|Gammaproteobacteria|Enterobacterales|Enterobacteriaceae|Salmonella|Salmonella enterica	Bacteria	Enterobacterales	Salmonella enterica subsp. enterica§taxonomy:59201	Proteobacteria	Salmonella enterica	CFSAN024758	0	0	441	4470	0.0986577	MarDB
GCF_000806645.1	/data2/marine_genomes_and_metagenomes/genomes_The_MAR_databases/prodigal_short/Salmonella/Salmonella_enterica_subsp._enterica_serovar_Brandenburg_GCF_000806645.1.fas	§insdc.gca:GCA_000806645.1	§mmp.db:MMP03079710	Gammaproteobacteria	Enterobacteriaceae	§gtdb:GCF_000006945.2	Salmonella	Bacteria|Proteobacteria|Gammaproteobacteria|Enterobacterales|Enterobacteriaceae|Salmonella|Salmonella enterica	Bacteria	Enterobacterales	Salmonella enterica subsp. enterica§taxonomy:59201	Proteobacteria	Salmonella enterica	CFSAN024765	0	0	432	4424	0.0976492	MarDB
GCF_001714255.1	/data2/marine_genomes_and_metagenomes/genomes_The_MAR_databases/prodigal_short/Salmonella/Salmonella_enterica_subsp._enterica_serovar_Enteritidis_GCF_001714255.1.fas	§insdc.gca:GCA_001714255.1	§mmp.db:MMP03079696	Gammaproteobacteria	Enterobacteriaceae	§gtdb:GCF_000006945.2	Salmonella	Bacteria|Proteobacteria|Gammaproteobacteria|Enterobacterales|Enterobacteriaceae|Salmonella|Salmonella enterica	Bacteria	Enterobacterales	Salmonella enterica subsp. enterica§taxonomy:59201	Proteobacteria	Salmonella enterica	CFSAN024751	0	0	438	4630	0.0946004	MarDB
GCF_003186345.1	/data2/marine_genomes_and_metagenomes/genomes_The_MAR_databases/prodigal_short/Salmonella/Salmonella_enterica_subsp._enterica_serovar_Typhimurium_78938_17_GCF_003186345.1.fas	§insdc.gca:GCA_003186345.1	§mmp.db:MMP09246471	Gammaproteobacteria	Enterobacteriaceae	§gtdb:GCF_000006945.2	Salmonella	Bacteria|Proteobacteria|Gammaproteobacteria|Enterobacterales|Enterobacteriaceae|Salmonella|Salmonella enterica	Bacteria	Enterobacterales	Salmonella enterica subsp. enterica serovar Typhimurium§taxonomy:90371	Proteobacteria	Salmonella enterica	78938/17	0	0	470	4794	0.0980392	MarDB
GCF_000806705.1	/data2/marine_genomes_and_metagenomes/genomes_The_MAR_databases/prodigal_short/Salmonella/Salmonella_enterica_subsp._enterica_serovar_Havana_CFSAN024770_GCF_000806705.1.fas	§insdc.gca:GCA_000806705.1	§mmp.db:MMP03079715	Gammaproteobacteria	Enterobacteriaceae	§gtdb:GCF_000006945.2	Salmonella	Bacteria|Proteobacteria|Gammaproteobacteria|Enterobacterales|Enterobacteriaceae|Salmonella|Salmonella enterica	Bacteria	Enterobacterales	Salmonella enterica subsp. enterica§taxonomy:59201	Proteobacteria	Salmonella enterica	CFSAN024770	0	0	438	4789	0.0914596	MarDB
GCF_001714185.1	/data2/marine_genomes_and_metagenomes/genomes_The_MAR_databases/prodigal_short/Salmonella/Salmonella_enterica_subsp._enterica_serovar_Enteritidis_GCF_001714185.1.fas	§insdc.gca:GCA_001714185.1	§mmp.db:MMP03079693	Gammaproteobacteria	Enterobacteriaceae	§gtdb:GCF_000006945.2	Salmonella	Bacteria|Proteobacteria|Gammaproteobacteria|Enterobacterales|Enterobacteriaceae|Salmonella|Salmonella enterica	Bacteria	Enterobacterales	Salmonella enterica subsp. enterica§taxonomy:59201	Proteobacteria	Salmonella enterica	CFSAN024748	0	0	434	4567	0.0950296	MarDB
GCF_001714225.1	/data2/marine_genomes_and_metagenomes/genomes_The_MAR_databases/prodigal_short/Salmonella/Salmonella_enterica_subsp._enterica_serovar_Enteritidis_GCF_001714225.1.fas	§insdc.gca:GCA_001714225.1	§mmp.db:MMP03079695	Gammaproteobacteria	Enterobacteriaceae	§gtdb:GCF_000006945.2	Salmonella	Bacteria|Proteobacteria|Gammaproteobacteria|Enterobacterales|Enterobacteriaceae|Salmonella|Salmonella enterica	Bacteria	Enterobacterales	Salmonella enterica subsp. enterica§taxonomy:59201	Proteobacteria	Salmonella enterica	CFSAN024750	0	0	439	4622	0.0949805	MarDB
GCF_001723795.1	/data2/marine_genomes_and_metagenomes/genomes_The_MAR_databases/prodigal_short/Salmonella/Salmonella_enterica_subsp._enterica_serovar_Heidelberg_GCF_001723795.1.fas	§insdc.gca:GCA_001723795.1	§mmp.db:MMP03079717	Gammaproteobacteria	Enterobacteriaceae	§gtdb:GCF_000006945.2	Salmonella	Bacteria|Proteobacteria|Gammaproteobacteria|Enterobacterales|Enterobacteriaceae|Salmonella|Salmonella enterica	Bacteria	Enterobacterales	Salmonella enterica subsp. enterica serovar Heidelberg§taxonomy:611	Proteobacteria	Salmonella enterica	CFSAN024772	0	0	421	4492	0.0937222	MarDB
GCF_001758525.1	/data2/marine_genomes_and_metagenomes/genomes_The_MAR_databases/prodigal_short/Salmonella/Salmonella_enterica_subsp._enterica_serovar_Typhimurium_TT6675_GCF_001758525.1.fas	§insdc.gca:GCA_001758525.1	§mmp.db:MMP05462015	Gammaproteobacteria	Enterobacteriaceae	§gtdb:GCF_000006945.2	Salmonella	Bacteria|Proteobacteria|Gammaproteobacteria|Enterobacterales|Enterobacteriaceae|Salmonella|Salmonella enterica	Bacteria	Enterobacterales	Salmonella enterica subsp. enterica serovar Typhimurium§taxonomy:90371	Proteobacteria	Salmonella enterica	TT6675	0	0	452	4616	0.0979203	MarDB
GCF_001707555.1	/data2/marine_genomes_and_metagenomes/genomes_The_MAR_databases/prodigal_short/Salmonella/Salmonella_enterica_subsp._enterica_serovar_Javiana_str._CFSAN000905_GCF_001707555.1.fas	§insdc.gca:GCA_001707555.1	§mmp.db:MMP01938999	Gammaproteobacteria	Enterobacteriaceae	§gtdb:GCF_000006945.2	Salmonella	Bacteria|Proteobacteria|Gammaproteobacteria|Enterobacterales|Enterobacteriaceae|Salmonella|Salmonella enterica	Bacteria	Enterobacterales	Salmonella enterica subsp. enterica serovar Javiana str. CFSAN000905§taxonomy:1299231	Proteobacteria	Salmonella enterica	CFSAN000905	0	0	401	4320	0.0928241	MarDB
GCF_000807055.1	/data2/marine_genomes_and_metagenomes/genomes_The_MAR_databases/prodigal_short/Salmonella/Salmonella_enterica_subsp._enterica_serovar_Livingstone_GCF_000807055.1.fas	§insdc.gca:GCA_000807055.1	§mmp.db:MMP03079662	Gammaproteobacteria	Enterobacteriaceae	§gtdb:GCF_000006945.2	Salmonella	Bacteria|Proteobacteria|Gammaproteobacteria|Enterobacterales|Enterobacteriaceae|Salmonella|Salmonella enterica	Bacteria	Enterobacterales	Salmonella enterica subsp. enterica§taxonomy:59201	Proteobacteria	Salmonella enterica	CFSAN024717	0	0	403	4387	0.0918623	MarDB
GCF_000807105.1	/data2/marine_genomes_and_metagenomes/genomes_The_MAR_databases/prodigal_short/Salmonella/Salmonella_enterica_subsp._enterica_serovar_Livingstone_GCF_000807105.1.fas	§insdc.gca:GCA_000807105.1	§mmp.db:MMP03079661	Gammaproteobacteria	Enterobacteriaceae	§gtdb:GCF_000006945.2	Salmonella	Bacteria|Proteobacteria|Gammaproteobacteria|Enterobacterales|Enterobacteriaceae|Salmonella|Salmonella enterica	Bacteria	Enterobacterales	Salmonella enterica subsp. enterica§taxonomy:59201	Proteobacteria	Salmonella enterica	CFSAN024716	0	0	398	4387	0.0907226	MarDB
GCF_000334155.1	/data2/marine_genomes_and_metagenomes/genomes_The_MAR_databases/prodigal_short/firmicutes/Alkalihalobacillus_ligniniphilus_L1_GCF_000334155.1.fas	§insdc.gca:GCA_000334155.1	§mmp.db:MMP02470111	Bacilli	Bacillaceae	§gtdb:GCF_000334155.1	Bacillus	Bacteria|Firmicutes|Bacilli|Bacillales|Bacillaceae_D|Bacillus_AN|Bacillus_AN ligniniphilus	Bacteria	Bacillales	Alkalihalobacillus ligniniphilus§taxonomy:1134413	Firmicutes	Unclassified	L1	0	0	222	3924	0.0565749	MarDB
GCF_001637335.1	/data2/marine_genomes_and_metagenomes/genomes_The_MAR_databases/prodigal_short/firmicutes/Paenibacillus_crassostreae_LPB0068_GCF_001637335.1.fas	§insdc.gca:GCA_001637335.1	§mmp.db:MMP04453328	Bacilli	Paenibacillaceae	§gtdb:GCF_001857945.1	Paenibacillus	Bacteria|Firmicutes_I|Bacilli_A|Paenibacillales|Paenibacillaceae|Paenibacillus|Paenibacillus crassostreae	Bacteria	Bacillales	Paenibacillus crassostreae§taxonomy:1763538	Firmicutes	Unclassified	LPB0068	0	0	162	4350	0.0372414	MarDB
GCF_003991135.1	/data2/marine_genomes_and_metagenomes/genomes_The_MAR_databases/prodigal_short/firmicutes/Anoxybacter_fermentans_DY22613_GCF_003991135.1.fas	§insdc.gca:GCA_003991135.1	§mmp.ref:MMP05285382	Clostridia	Halanaerobiales (family)	0	Anoxybacter	Bacteria|Firmicutes_F|Halanaerobiia	Bacteria	Halanaerobiales	Anoxybacter fermentans§taxonomy:1323375	Firmicutes	Anoxybacter fermentans	DY22613|MCCC 1A06456|DSM 28033|JCM 19466	0	0	214	3198	0.0669168	MarRef
GCF_900156275.1	/data2/marine_genomes_and_metagenomes/genomes_The_MAR_databases/prodigal_short/firmicutes/Bacillus_altitudinis_RRD69_GCF_900156275.1.fas	§insdc.gca:GCA_900156275.1	§mmp.db:MMP05216491	Bacilli	Bacillaceae	§gtdb:GCF_000691145.1	Bacillus	Bacteria|Firmicutes|Bacilli|Bacillales|Bacillaceae|Bacillus|Bacillus altitudinis	Bacteria	Bacillales	Bacillus sp. RRD69§taxonomy:1855345	Firmicutes	Unclassified	RRD69	0	0	89	3750	0.0237333	MarDB
GCF_004116995.1	/data2/marine_genomes_and_metagenomes/genomes_The_MAR_databases/prodigal_short/firmicutes/Neobacillus_thermocopriae_DUT50_236_GCF_004116995.1.fas	§insdc.gca:GCA_004116995.1	§mmp.ref:MMP08222609	Bacilli	Bacillaceae	§gtdb:GCF_002197485.1	Bacillus	Bacteria|Firmicutes|Bacilli|Bacillales|Anoxybacillaceae|Anoxybacillus|Anoxybacillus	Bacteria	Bacillales	Neobacillus thermocopriae§taxonomy:1215031	Firmicutes	Bacillus thermocopriae	DUT50_236	0	0	138	2957	0.0466689	MarRef
GCF_001307105.1	/data2/marine_genomes_and_metagenomes/genomes_The_MAR_databases/prodigal_short/firmicutes/Bacillus_australimaris_NH7I_1_GCF_001307105.1.fas	§insdc.gca:GCA_001307105.1	§mmp.db:MMP03892176	Bacilli	Bacillaceae	§gtdb:GCF_001307105.1	Bacillus	Bacteria|Firmicutes|Bacilli|Bacillales|Bacillaceae|Bacillus|Bacillus australimaris	Bacteria	Bacillales	Bacillus australimaris§taxonomy:1326968	Firmicutes	Unclassified	NH7I_1	0	0	86	3688	0.0233189	MarDB
GCF_900156645.1	/data2/marine_genomes_and_metagenomes/genomes_The_MAR_databases/prodigal_short/firmicutes/Salimicrobium_flavidum_DSM_23127_GCF_900156645.1.fas	§insdc.gca:GCA_900156645.1	§mmp.db:MMP05421687	Bacilli	Bacillaceae	§gtdb:GCF_900156645.1	Salimicrobium	Bacteria|Firmicutes|Bacilli|Bacillales|Halobacillaceae|Salimicrobium|Salimicrobium flavidum	Bacteria	Bacillales	Salimicrobium flavidum§taxonomy:570947	Firmicutes	Unclassified	DSM 23127	0	0	87	2909	0.0299072	MarDB
GCF_002744245.1	/data2/marine_genomes_and_metagenomes/genomes_The_MAR_databases/prodigal_short/firmicutes/Bacillus_pumilus_36R_ATNSAL_GCF_002744245.1.fas	§insdc.gca:GCA_002744245.1	§mmp.db:MMP07270068	Bacilli	Bacillaceae	§gtdb:GCF_002744245.1	Bacillus	Bacteria|Firmicutes|Bacilli|Bacillales|Bacillaceae|Bacillus|Bacillus pumilus_M	Bacteria	Bacillales	Bacillus pumilus§taxonomy:1408	Firmicutes	Unclassified	36R_ATNSAL	0	0	276	4276	0.0645463	MarDB
GCF_002140315.1	/data2/marine_genomes_and_metagenomes/genomes_The_MAR_databases/prodigal_short/firmicutes/Enterococcus_faecium_11C6_DIV0699_GCF_002140315.1.fas	§insdc.gca:GCA_002140315.1	§mmp.db:MMP04634036	Bacilli	Enterococcaceae	§gtdb:GCF_001544255.1	Enterococcus	Bacteria|Firmicutes|Bacilli|Lactobacillales|Enterococcaceae|Enterococcus_B|Enterococcus_B faecium	Bacteria	Lactobacillales	Enterococcus faecium§taxonomy:1352	Firmicutes	Unclassified	11C6_DIV0699	0	0	86	2646	0.0325019	MarDB
GCF_002926065.1	/data2/marine_genomes_and_metagenomes/genomes_The_MAR_databases/prodigal_short/firmicutes/Jeotgalibacillus_proteolyticus_22-7_GCF_002926065.1.fas	§insdc.gca:GCA_002926065.1	§mmp.db:MMP08469618	Bacilli	Planococcaceae	§gtdb:GCF_002926065.1	Jeotgalibacillus	Bacteria|Firmicutes|Bacilli|Bacillales|Jeotgalibacillaceae|Jeotgalibacillus|Jeotgalibacillus sp002926065	Bacteria	Bacillales	Jeotgalibacillus proteolyticus§taxonomy:2082395	Firmicutes	Jeotgalibacillus sp. 22-7	44764	0	0	93	4232	0.0219754	MarDB
GCF_004328925.1	/data2/marine_genomes_and_metagenomes/genomes_The_MAR_databases/prodigal_short/firmicutes/Bacillus_subtilis_subsp._subtilis_G7_GCF_004328925.1.fas	§insdc.gca:GCA_004328925.1	§mmp.ref:MMP09273200	Bacilli	Bacillaceae	§gtdb:GCF_000009045.1	Bacillus	Bacteria|Firmicutes|Bacilli|Bacillales|Bacillaceae|Bacillus|Bacillus	Bacteria	Bacillales	Bacillus subtilis subsp. subtilis§taxonomy:135461	Firmicutes	Bacillus subtilis	G7	0	0	107	4229	0.0253015	MarRef
GCF_900101165.1	/data2/marine_genomes_and_metagenomes/genomes_The_MAR_databases/prodigal_short/firmicutes/Alkalibacterium_thalassium_DSM_19181_GCF_900101165.1.fas	§insdc.gca:GCA_900101165.1	§mmp.db:MMP04488098	Bacilli	Carnobacteriaceae	§gtdb:GCF_900101165.1	Alkalibacterium	Bacteria|Firmicutes|Bacilli|Lactobacillales|Carnobacteriaceae|Alkalibacterium|Alkalibacterium thalassium	Bacteria	Lactobacillales	Alkalibacterium thalassium§taxonomy:426701	Firmicutes	Unclassified	T117-1-2|DSM 19181|NBRC 103241|NRIC 0718	0	0	128	2318	0.05522	MarDB
GCF_002835635.1	/data2/marine_genomes_and_metagenomes/genomes_The_MAR_databases/prodigal_short/firmicutes/Bacillus_cereus_TS2_GCF_002835635.1.fas	§insdc.gca:GCA_002835635.1	§mmp.db:MMP08131263	Bacilli	Bacillaceae	§gtdb:GCF_002214725.1	Bacillus	Bacteria|Firmicutes|Bacilli|Bacillales|Bacillaceae_G|Bacillus_A|Bacillus_A cereus_AD	Bacteria	Bacillales	Bacillus cereus§taxonomy:1396	Firmicutes	Unclassified	TS2	0	0	134	5431	0.0246732	MarDB
GCF_000353245.1	/data2/marine_genomes_and_metagenomes/genomes_The_MAR_databases/prodigal_short/firmicutes/Bacillus_stratosphericus_LAMA_585_GCF_000353245.1.fas	§insdc.gca:GCA_000353245.1	§mmp.db:MMP02471373	Bacilli	Bacillaceae	§gtdb:GCF_000691145.1	Bacillus	Bacteria|Firmicutes|Bacilli|Bacillales|Bacillaceae|Bacillus|Bacillus altitudinis	Bacteria	Bacillales	Bacillus stratosphericus LAMA 585§taxonomy:1236481	Firmicutes	Unclassified	LAMA 585	0	0	93	3826	0.0243074	MarDB
GCF_003987495.1	/data2/marine_genomes_and_metagenomes/genomes_The_MAR_databases/prodigal_short/firmicutes/Vagococcus_salmoninarum_NCFB_2777_GCF_003987495.1.fas	§insdc.gca:GCA_003987495.1	§mmp.db:MMP06609018	Bacilli	Enterococcaceae	0	Vagococcus	Bacteria|Firmicutes|Bacilli|Lactobacillales|Vagococcaceae	Bacteria	Lactobacillales	Vagococcus salmoninarum§taxonomy:2739	Firmicutes	Vagococcus salmoninarum	NCFB 2777	0	0	87	2929	0.029703	MarDB
GCF_001655735.1	/data2/marine_genomes_and_metagenomes/genomes_The_MAR_databases/prodigal_short/firmicutes/Bacillus_sp._MKU004_GCF_001655735.1.fas	§insdc.gca:GCA_001655735.1	§mmp.db:MMP04589240	Bacilli	Bacillaceae	§gtdb:GCF_001456935.1	Bacillus	Bacteria|Firmicutes|Bacilli|Bacillales|Bacillaceae_B|Bacillus_F|Bacillus_F enclensis	Bacteria	Bacillales	Bacillus sp. MKU004§taxonomy:1849370	Firmicutes	Unclassified	MKU004	0	0	188	4522	0.0415745	MarDB
GCF_000283575.1	/data2/marine_genomes_and_metagenomes/genomes_The_MAR_databases/prodigal_short/firmicutes/Oscillibacter_valericigenes_Sjm18-20_GCF_000283575.1.fas	§insdc.gca:GCA_000283575.1	§mmp.ref:MMP00061111	Clostridia	Oscillospiraceae	§gtdb:GCF_000283575.1	Oscillibacter	Bacteria|Firmicutes_A|Clostridia|Oscillospirales|Oscillospiraceae|Oscillibacter|Oscillibacter valericigenes	Bacteria	Clostridiales	Oscillibacter valericigenes Sjm18-20§taxonomy:693746	Firmicutes	Oscillibacter valericigenes	Sjm18-20|DSM 18026|NBRC 101213	0	0	228	4392	0.0519126	MarRef
GCF_003628445.1	/data2/marine_genomes_and_metagenomes/genomes_The_MAR_databases/prodigal_short/firmicutes/Oceanobacillus_bengalensis_MCCC_1K00260_GCF_003628445.1.fas	§insdc.gca:GCA_003628445.1	§mmp.db:MMP10172241	Bacilli	Bacillaceae	0	Oceanobacillus	Bacteria|Firmicutes|Bacilli|Bacillales|Amphibacillaceae|Oceanobacillus	Bacteria	Bacillales	Oceanobacillus bengalensis§taxonomy:1435466	Firmicutes	Oceanobacillus bengalensis	Ma-21|MCCC 1K00260|CGMCC 1.12799|KCTC 33416	0	0	154	3939	0.0390962	MarDB
GCF_002797995.1	/data2/marine_genomes_and_metagenomes/genomes_The_MAR_databases/prodigal_short/firmicutes/Clostridium_botulinum_202F_GCF_002797995.1.fas	§insdc.gca:GCA_002797995.1	§mmp.db:MMP07446461	Clostridia	Clostridiaceae	§gtdb:GCF_000020165.1	Clostridium	Bacteria|Firmicutes_A|Clostridia|Clostridiales|Clostridiaceae|Clostridium|Clostridium botulinum_B	Bacteria	Clostridiales	Clostridium botulinum§taxonomy:1491	Firmicutes	Unclassified	202F	0	0	172	3612	0.047619	MarDB
GCF_001884065.1	/data2/marine_genomes_and_metagenomes/genomes_The_MAR_databases/prodigal_short/firmicutes/Bacillus_proteolyticus_TD42_GCF_001884065.1.fas	§insdc.gca:GCA_001884065.1	§mmp.db:MMP05231663	Bacilli	Bacillaceae	§gtdb:GCF_002582595.1	Bacillus	Bacteria|Firmicutes|Bacilli|Bacillales|Bacillaceae_G|Bacillus_A|Bacillus_A cereus_AY	Bacteria	Bacillales	380264	Firmicutes	Unclassified	TD42|MCCC 1A00365	0	0	331	6120	0.054085	MarDB
GCF_900109325.1	/data2/marine_genomes_and_metagenomes/genomes_The_MAR_databases/prodigal_short/firmicutes/Alkalibacterium_pelagium_DSM_19183_GCF_900109325.1.fas	§insdc.gca:GCA_900109325.1	§mmp.db:MMP04488099	Bacilli	Carnobacteriaceae	§gtdb:GCF_900109325.1	Alkalibacterium	Bacteria|Firmicutes|Bacilli|Lactobacillales|Carnobacteriaceae|Alkalibacterium|Alkalibacterium pelagium	Bacteria	Lactobacillales	Alkalibacterium pelagium§taxonomy:426702	Firmicutes	Unclassified	T143-1-1|DSM 19183|NBRC 103242|NRIC 0719	0	0	67	2443	0.0274253	MarDB
GCF_003609595.1	/data2/marine_genomes_and_metagenomes/genomes_The_MAR_databases/prodigal_short/firmicutes/Caminicella_sporogenes_AM_1114_GCF_003609595.1.fas	§insdc.gca:GCA_003609595.1	§mmp.db:MMP05504940	Clostridia	Clostridiaceae	§gtdb:GCF_900142285.1	Caminicella	Bacteria|Firmicutes_A|Clostridia|Peptostreptococcales|Caminicellaceae|Caminicella|Caminicella sporogenes	Bacteria	Clostridiales	Caminicella sporogenes§taxonomy:166485	Firmicutes	Caminicella sporogenes	AM 1114	0	0	122	2361	0.051673	MarDB
GCF_900142005.1	/data2/marine_genomes_and_metagenomes/genomes_The_MAR_databases/prodigal_short/firmicutes/Dethiosulfatibacter_aminovorans_DSM_17477_GCF_900142005.1.fas	§insdc.gca:GCA_900142005.1	§mmp.db:MMP02745751	Tissierellia	Tissierellia (family)	§gtdb:GCF_900142005.1	Dethiosulfatibacter	Bacteria|Firmicutes_A|Clostridia|Tissierellales|Dethiosulfatibacteraceae|Dethiosulfatibacter|Dethiosulfatibacter aminovorans	Bacteria	Tissierellia (order)	Dethiosulfatibacter aminovorans DSM 17477§taxonomy:1121476	Firmicutes	Dethiosulfatibacter aminovorans	C/G2|DSM 17477|JCM 13356|NBRC 101112	0	0	168	3698	0.04543	MarDB
GCF_000948175.1	/data2/marine_genomes_and_metagenomes/genomes_The_MAR_databases/prodigal_short/firmicutes/Bacillus_alveayuensis_24KAM51_GCF_000948175.1.fas	§insdc.gca:GCA_000948175.1	§mmp.db:MMP03025778	Bacilli	Bacillaceae	0	Bacillus	Archaea|Nanohaloarchaeota|Nanosalinia	Bacteria	Bacillales	Bacillus alveayuensis§taxonomy:279215	Firmicutes	Unclassified	24KAM51	0	0	254	6732	0.0377302	MarDB
GCF_002954125.1	/data2/marine_genomes_and_metagenomes/genomes_The_MAR_databases/prodigal_short/firmicutes/Clostridium_beijerinckii_WB_GCF_002954125.1.fas	§insdc.gca:GCA_002954125.1	§mmp.db:MMP08107721	Clostridia	Clostridiaceae	§gtdb:GCF_002006445.1	Clostridium	Bacteria|Firmicutes_A|Clostridia|Clostridiales|Clostridiaceae|Clostridium|Clostridium beijerinckii	Bacteria	Clostridiales	Clostridium beijerinckii§taxonomy:1520	Firmicutes	Clostridium beijerinckii	WB	0	0	223	5144	0.0433515	MarDB
GCF_003020795.1	/data2/marine_genomes_and_metagenomes/genomes_The_MAR_databases/prodigal_short/firmicutes/Bacillus_pumilus_Ha06YP001_GCF_003020795.1.fas	§insdc.gca:GCA_003020795.1	§mmp.db:MMP08568348	Bacilli	Bacillaceae	§gtdb:GCF_900186955.1	Bacillus	Bacteria|Firmicutes|Bacilli|Bacillales|Bacillaceae|Bacillus|Bacillus pumilus	Bacteria	Bacillales	Bacillus pumilus§taxonomy:1408	Firmicutes	Bacillus pumilus	Ha06YP001	0	0	74	3660	0.0202186	MarDB
GCF_001573665.1	/data2/marine_genomes_and_metagenomes/genomes_The_MAR_databases/prodigal_short/firmicutes/Clostridium_botulinum_Walls_8G_GCF_001573665.1.fas	§insdc.gca:GCA_001573665.1	§mmp.db:MMP03779992	Clostridia	Clostridiaceae	§gtdb:GCF_001276985.1	Clostridium	Bacteria|Firmicutes_A|Clostridia|Clostridiales|Clostridiaceae|Clostridium_F|Clostridium_F botulinum	Bacteria	Clostridiales	Clostridium botulinum§taxonomy:1491	Firmicutes	Unclassified	Walls 8G	0	0	190	3730	0.0509383	MarDB
GCF_001648555.1	/data2/marine_genomes_and_metagenomes/genomes_The_MAR_databases/prodigal_short/firmicutes/Rossellomorea_aquimaris_TF-12_TF12_GCF_001648555.1.fas	§insdc.gca:GCA_001648555.1	§mmp.db:MMP04403367	Bacilli	Bacillaceae	§gtdb:GCF_001648555.1	Bacillus	Bacteria|Firmicutes|Bacilli|Bacillales|Bacillaceae_B|Bacillus_F|Bacillus_F aquimaris	Bacteria	Bacillales	Bacillus aquimaris TF-12§taxonomy:1073842	Firmicutes	Bacillus aquimaris	TF12	0	0	118	4076	0.02895	MarDB
GCF_009363695.1	/data2/marine_genomes_and_metagenomes/genomes_The_MAR_databases/prodigal_short/firmicutes/Bacillus_sp._THAF10_GCF_009363695.1.fas	§insdc.gca:GCA_009363695.1	§mmp.ref:MMP11996113	Bacilli	Bacillaceae	0	Bacillus	Bacteria|Firmicutes|Bacilli|Bacillales|Bacillaceae_I|Bacillus_G	Bacteria	Bacillales	Bacillus sp. THAF10§taxonomy:2587848	Firmicutes	Bacillus sp. THAF10	THAF10	0	0	111	4174	0.0265932	MarRef
GCF_003665065.1	/data2/marine_genomes_and_metagenomes/genomes_The_MAR_databases/prodigal_short/firmicutes/Oceanobacillus_piezotolerans_YLB-02_GCF_003665065.1.fas	§insdc.gca:GCA_003665065.1	§mmp.db:MMP10172232	Bacilli	Bacillaceae	0	Oceanobacillus	Bacteria|Firmicutes|Bacilli|Bacillales|Amphibacillaceae|Oceanobacillus	Bacteria	Bacillales	Oceanobacillus piezotolerans§taxonomy:2448030	Firmicutes	Oceanobacillus sp. YLB-02	YLB-02	0	0	122	3897	0.0313061	MarDB
GCF_001273195.1	/data2/marine_genomes_and_metagenomes/genomes_The_MAR_databases/prodigal_short/firmicutes/Clostridium_botulinum_ATCC_23387_GCF_001273195.1.fas	§insdc.gca:GCA_001273195.1	§mmp.db:MMP03787460	Clostridia	Clostridiaceae	§gtdb:GCF_000020165.1	Clostridium	Bacteria|Firmicutes_A|Clostridia|Clostridiales|Clostridiaceae|Clostridium|Clostridium botulinum_B	Bacteria	Clostridiales	Clostridium botulinum§taxonomy:1491	Firmicutes	Unclassified	ATCC 23387	0	0	163	3621	0.0450152	MarDB
GCF_900096905.1	/data2/marine_genomes_and_metagenomes/genomes_The_MAR_databases/prodigal_short/firmicutes/Pelagirhabdus_alkalitolerans_S5_GCF_900096905.1.fas	§insdc.gca:GCA_900096905.1	§mmp.db:MMP05421734	Bacilli	Bacillaceae	§gtdb:GCF_900096905.1	Pelagirhabdus	Bacteria|Firmicutes|Bacilli|Bacillales|Amphibacillaceae|Pelagirhabdus|Pelagirhabdus alkalitolerans	Bacteria	Bacillales	Pelagirhabdus alkalitolerans§taxonomy:1612202	Firmicutes	Unclassified	S5|KCTC 33632|CGMCC 1.15177	0	0	68	2417	0.0281341	MarDB
GCF_000496855.1	/data2/marine_genomes_and_metagenomes/genomes_The_MAR_databases/prodigal_short/firmicutes/Sediminibacillus_halophilus_NSP9.3_GCF_000496855.1.fas	§insdc.gca:GCA_000496855.1	§mmp.db:MMP02469734	Bacilli	Bacillaceae	§gtdb:GCF_000496855.1	Sediminibacillus	Bacteria|Firmicutes|Bacilli|Bacillales|Amphibacillaceae|Sediminibacillus|Sediminibacillus halophilus_B	Bacteria	Bacillales	Sediminibacillus halophilus NSP9.3§taxonomy:1401260	Firmicutes	Sediminibacillus halophilus	NSP9.3	0	0	89	3904	0.0227971	MarDB
GCF_000819585.1	/data2/marine_genomes_and_metagenomes/genomes_The_MAR_databases/prodigal_short/firmicutes/Bacillus_sp._A053_GCF_000819585.1.fas	§insdc.gca:GCA_000819585.1	§mmp.db:MMP03273270	Bacilli	Bacillaceae	§gtdb:GCF_000009045.1	Bacillus	Bacteria|Firmicutes|Bacilli|Bacillales|Bacillaceae|Bacillus|Bacillus subtilis	Bacteria	Bacillales	Bacillus sp. A053§taxonomy:1590027	Firmicutes	Unclassified	A053	0	0	100	4091	0.0244439	MarDB
GCF_001687605.2	/data2/marine_genomes_and_metagenomes/genomes_The_MAR_databases/prodigal_short/firmicutes/Planococcus_plakortidis_DSM_23997_GCF_001687605.2.fas	§insdc.gca:GCA_001687605.2	§mmp.ref:MMP05366384	Bacilli	Planococcaceae	§gtdb:GCF_001687605.2	Planococcus	Bacteria|Firmicutes|Bacilli|Bacillales_A|Planococcaceae|Planococcus_B|Planococcus_B plakortidis	Bacteria	Bacillales	Planococcus plakortidis§taxonomy:1038856	Firmicutes	Unclassified	AS/ASP6 (II)|DSM 23997|MTCC 8491	0	0	96	3266	0.0293938	MarRef
GCF_009720625.1	/data2/marine_genomes_and_metagenomes/genomes_The_MAR_databases/prodigal_short/firmicutes/Bacillus_sp._DSL-17_GCF_009720625.1.fas	§insdc.gca:GCA_009720625.1	§mmp.ref:MMP13336233	Bacilli	Bacillaceae	§gtdb:GCF_003259415.1	Bacillus	Bacteria|Firmicutes|Bacilli|Bacillales|Bacillaceae|Bacillus_AY	Bacteria	Bacillales	Bacillus sp. DSL-17§taxonomy:2567941	Firmicutes	Bacillus sp. DSL-17	DSL-17	0	0	181	5297	0.0341703	MarRef
GCF_001687665.2	/data2/marine_genomes_and_metagenomes/genomes_The_MAR_databases/prodigal_short/firmicutes/Planococcus_donghaensis_DSM_22276_GCF_001687665.2.fas	§insdc.gca:GCA_001687665.2	§mmp.ref:MMP05417750	Bacilli	Planococcaceae	§gtdb:GCF_001687665.2	Planococcus	Bacteria|Firmicutes|Bacilli|Bacillales_A|Planococcaceae|Planococcus_A|Planococcus_A donghaensis	Bacteria	Bacillales	Planococcus donghaensis§taxonomy:414778	Firmicutes	Unclassified	JH1|DSM 22276|KCTC 13050|LMG 23779	0	0	81	3168	0.0255682	MarRef
GCF_000750005.1	/data2/marine_genomes_and_metagenomes/genomes_The_MAR_databases/prodigal_short/firmicutes/Geobacillus_icigianus_G1w1_GCF_000750005.1.fas	§insdc.gca:GCA_000750005.1	§mmp.db:MMP02850065	Bacilli	Bacillaceae	§gtdb:GCF_000750005.1	Geobacillus	Bacteria|Firmicutes|Bacilli|Bacillales|Anoxybacillaceae|Geobacillus|Geobacillus icigianus	Bacteria	Bacillales	Geobacillus icigianus§taxonomy:1430331	Firmicutes	Unclassified	G1w1	0	0	192	3491	0.0549986	MarDB
GCF_900186135.1	/data2/marine_genomes_and_metagenomes/genomes_The_MAR_databases/prodigal_short/firmicutes/Listeria_sp._ILCC792_GCF_900186135.1.fas	§insdc.gca:GCA_900186135.1	§mmp.db:MMP104121261	Bacilli	Listeriaceae	§gtdb:GCF_900186165.1	Listeria	Bacteria|Firmicutes|Bacilli|Lactobacillales|Listeriaceae|Listeria|Listeria sp900186165	Bacteria	Bacillales	Listeria goaensis§taxonomy:1649188	Firmicutes	Unclassified	Listeria sp. ILCC792	0	0	91	2715	0.0335175	MarDB
GCF_001590835.1	/data2/marine_genomes_and_metagenomes/genomes_The_MAR_databases/prodigal_short/firmicutes/Bacillus_gaemokensis_KCTC_13318_GCF_001590835.1.fas	§insdc.gca:GCA_001590835.1	§mmp.db:MMP04515759	Bacilli	Bacillaceae	§gtdb:GCF_001590835.1	Bacillus	Bacteria|Firmicutes|Bacilli|Bacillales|Bacillaceae_G|Bacillus_A|Bacillus_A gaemokensis	Bacteria	Bacillales	Bacillus gaemokensis§taxonomy:574375	Firmicutes	Unclassified	KCTC 13318	0	0	279	5747	0.0485471	MarDB
GCF_002964605.1	/data2/marine_genomes_and_metagenomes/genomes_The_MAR_databases/prodigal_short/firmicutes/Vallitalea_okinawensis_S15_GCF_002964605.1.fas	§insdc.gca:GCA_002964605.1	§mmp.db:MMP08358016	Clostridia	Defluviitaleaceae	§gtdb:GCF_002964605.1	Vallitalea	Bacteria|Firmicutes_A|Clostridia|Lachnospirales|Vallitaleaceae_A|Vallitalea_A|Vallitalea_A okinawensis	Bacteria	Clostridiales	Vallitalea okinawensis§taxonomy:2078660	Firmicutes	Vallitalea sp. S15	S15	0	0	202	5265	0.0383666	MarDB
GCF_001866655.1	/data2/marine_genomes_and_metagenomes/genomes_The_MAR_databases/prodigal_short/firmicutes/Bacillus_sp._MUM_116_GCF_001866655.1.fas	§insdc.gca:GCA_001866655.1	§mmp.db:MMP05915830	Bacilli	Bacillaceae	§gtdb:GCF_001866655.1	Bacillus	Bacteria|Firmicutes|Bacilli|Bacillales|Bacillaceae_A|Bacillus_W|Bacillus_W sp001866655	Bacteria	Bacillales	Bacillus sp. MUM 116§taxonomy:1678002	Firmicutes	Unclassified	MUM 116	0	0	290	5692	0.0509487	MarDB
GCF_000712615.1	/data2/marine_genomes_and_metagenomes/genomes_The_MAR_databases/prodigal_short/firmicutes/Bacillus_gaemokensis_JCM_15801_GCF_000712615.1.fas	§insdc.gca:GCA_000712615.1	§mmp.db:MMP02854354	Bacilli	Bacillaceae	§gtdb:GCF_001590835.1	Bacillus	Bacteria|Firmicutes|Bacilli|Bacillales|Bacillaceae_G|Bacillus_A|Bacillus_A gaemokensis	Bacteria	Bacillales	Bacillus gaemokensis§taxonomy:574375	Firmicutes	Unclassified	JCM 15801	0	0	357	5784	0.061722	MarDB
GCF_000011245.1	/data2/marine_genomes_and_metagenomes/genomes_The_MAR_databases/prodigal_short/firmicutes/Oceanobacillus_iheyensis_HTE831_GCF_000011245.1.fas	§insdc.gca:GCA_000011245.1	§mmp.ref:MMP00061101	Bacilli	Bacillaceae	§gtdb:GCF_000011245.1	Oceanobacillus	Bacteria|Firmicutes|Bacilli|Bacillales|Amphibacillaceae|Oceanobacillus|Oceanobacillus iheyensis	Bacteria	Bacillales	Oceanobacillus iheyensis HTE831§taxonomy:221109	Firmicutes	Oceanobacillus iheyensis	HTE831|DSM 14371|CIP 107618|JCM 11309|KCTC 3954	0	0	86	3564	0.0241302	MarRef
GCF_001884035.1	/data2/marine_genomes_and_metagenomes/genomes_The_MAR_databases/prodigal_short/firmicutes/Bacillus_tropicus_N24_GCF_001884035.1.fas	§insdc.gca:GCA_001884035.1	§mmp.db:MMP05231550	Bacilli	Bacillaceae	§gtdb:GCF_000832805.1	Bacillus	Bacteria|Firmicutes|Bacilli|Bacillales|Bacillaceae_G|Bacillus_A|Bacillus_A cereus_T	Bacteria	Bacillales	Bacillus sp. N24§taxonomy:576432	Firmicutes	Unclassified	N24|MCC 1A01406	0	0	176	5364	0.0328113	MarDB
GCF_002214325.1	/data2/marine_genomes_and_metagenomes/genomes_The_MAR_databases/prodigal_short/firmicutes/Exiguobacterium_sp._N4-1P_GCF_002214325.1.fas	§insdc.gca:GCA_002214325.1	§mmp.db:MMP04537352	Bacilli	Bacilli (family)	§gtdb:GCF_000702625.1	Exiguobacterium	Bacteria|Firmicutes|Bacilli|Exiguobacterales|Exiguobacteraceae|Exiguobacterium_A|Exiguobacterium_A oxidotolerans	Bacteria	Bacillales	Exiguobacterium oxidotolerans§taxonomy:223958	Firmicutes	Unclassified	N4-1P	0	0	123	3791	0.0324453	MarDB
GCF_000815145.1	/data2/marine_genomes_and_metagenomes/genomes_The_MAR_databases/prodigal_short/firmicutes/Bacillus_sp._Pc3_GCF_000815145.1.fas	§insdc.gca:GCA_000815145.1	§mmp.ref:MMP03272513	Bacilli	Bacillaceae	§gtdb:GCF_001461825.1	Bacillus	Bacteria|Firmicutes|Bacilli|Bacillales|Bacillaceae|Bacillus|Bacillus velezensis	Bacteria	Bacillales	Bacillus sp. Pc3§taxonomy:1446792	Firmicutes	Bacillus sp. Pc3	Pc3|CCTCC M 2013470)	0	0	98	3818	0.0256679	MarRef
GCF_900186175.1	/data2/marine_genomes_and_metagenomes/genomes_The_MAR_databases/prodigal_short/firmicutes/Listeria_sp._ILCC796_GCF_900186175.1.fas	§insdc.gca:GCA_900186175.1	§mmp.db:MMP104121263	Bacilli	Listeriaceae	§gtdb:GCF_900186165.1	Listeria	Bacteria|Firmicutes|Bacilli|Lactobacillales|Listeriaceae|Listeria|Listeria sp900186165	Bacteria	Bacillales	Listeria goaensis§taxonomy:1649188	Firmicutes	Unclassified	Listeria sp. ILCC796	0	0	77	2545	0.0302554	MarDB
GCF_001883965.1	/data2/marine_genomes_and_metagenomes/genomes_The_MAR_databases/prodigal_short/firmicutes/Bacillus_cereus_A8S3_GCF_001883965.1.fas	§insdc.gca:GCA_001883965.1	§mmp.db:MMP05230476	Bacilli	Bacillaceae	§gtdb:GCF_000007825.1	Bacillus	Bacteria|Firmicutes|Bacilli|Bacillales|Bacillaceae_G|Bacillus_A|Bacillus_A cereus	Bacteria	Bacillales	Bacillus cereus§taxonomy:1396	Firmicutes	Unclassified	A8S3|MCCC 1A01874	0	0	282	6005	0.0469609	MarDB
GCF_900110345.1	/data2/marine_genomes_and_metagenomes/genomes_The_MAR_databases/prodigal_short/firmicutes/Amphibacillus_marinus_CGMCC_1.10434_GCF_900110345.1.fas	§insdc.gca:GCA_900110345.1	§mmp.db:MMP04488134	Bacilli	Bacillaceae	§gtdb:GCF_900110345.1	Amphibacillus	Bacteria|Firmicutes|Bacilli|Bacillales|Amphibacillaceae|Amphibacillus_B|Amphibacillus_B marinus	Bacteria	Bacillales	Amphibacillus marinus§taxonomy:872970	Firmicutes	Unclassified	J1|CGMCC 1.10434|JCM 17099	0	0	110	3313	0.0332025	MarDB
GCF_001883865.1	/data2/marine_genomes_and_metagenomes/genomes_The_MAR_databases/prodigal_short/firmicutes/Bacillus_cereus_N31_GCF_001883865.1.fas	§insdc.gca:GCA_001883865.1	§mmp.db:MMP05230499	Bacilli	Bacillaceae	§gtdb:GCF_000007825.1	Bacillus	Bacteria|Firmicutes|Bacilli|Bacillales|Bacillaceae_G|Bacillus_A|Bacillus_A cereus	Bacteria	Bacillales	Bacillus cereus§taxonomy:1396	Firmicutes	Unclassified	N31|MCCC 1A01404	0	0	214	5520	0.0387681	MarDB
GCF_900114715.1	/data2/marine_genomes_and_metagenomes/genomes_The_MAR_databases/prodigal_short/firmicutes/Salibacterium_qingdaonense_CGMCC_1.6134_GCF_900114715.1.fas	§insdc.gca:GCA_900114715.1	§mmp.db:MMP04488054	Bacilli	Bacillaceae	§gtdb:GCF_900114715.1	Salibacterium	Bacteria|Firmicutes|Bacilli|Bacillales|Marinococcaceae|Salibacterium|Salibacterium qingdaonense	Bacteria	Bacillales	Salibacterium qingdaonense§taxonomy:266892	Firmicutes	Unclassified	CGMCC 1.6134	0	0	128	3586	0.0356944	MarDB
GCF_001884185.1	/data2/marine_genomes_and_metagenomes/genomes_The_MAR_databases/prodigal_short/firmicutes/Bacillus_albus_N35-10-2_GCF_001884185.1.fas	§insdc.gca:GCA_001884185.1	§mmp.db:MMP05231551	Bacilli	Bacillaceae	§gtdb:GCF_002146655.1	Bacillus	Bacteria|Firmicutes|Bacilli|Bacillales|Bacillaceae_G|Bacillus_A|Bacillus_A thuringiensis_M	Bacteria	Bacillales	1866313	Firmicutes	Unclassified	N35-10-2	0	0	268	5879	0.045586	MarDB
GCF_003015255.1	/data2/marine_genomes_and_metagenomes/genomes_The_MAR_databases/prodigal_short/firmicutes/Clostridium_diolis_WST_GCF_003015255.1.fas	§insdc.gca:GCA_003015255.1	§mmp.db:MMP08493996	Clostridia	Clostridiaceae	§gtdb:GCF_002006445.1	Clostridium	Bacteria|Firmicutes_A|Clostridia|Clostridiales|Clostridiaceae|Clostridium|Clostridium beijerinckii	Bacteria	Clostridiales	Clostridium diolis§taxonomy:223919	Firmicutes	Clostridium diolis	WST	0	0	263	5316	0.0494733	MarDB
GCF_001274775.1	/data2/marine_genomes_and_metagenomes/genomes_The_MAR_databases/prodigal_short/firmicutes/Rossellomorea_marisflavi_JCM_11544_GCF_001274775.1.fas	§insdc.gca:GCA_001274775.1	§mmp.db:MMP03940004	Bacilli	Bacillaceae	§gtdb:GCF_001274775.1	Bacillus	Bacteria|Firmicutes|Bacilli|Bacillales|Bacillaceae_B|Bacillus_F|Bacillus_F marisflavi	Bacteria	Bacillales	Bacillus marisflavi§taxonomy:189381	Firmicutes	Unclassified	TF-11	0	0	96	4383	0.0219028	MarDB
GCF_002744235.1	/data2/marine_genomes_and_metagenomes/genomes_The_MAR_databases/prodigal_short/firmicutes/Bacillus_safensis_13L_LOBSAL_GCF_002744235.1.fas	§insdc.gca:GCA_002744235.1	§mmp.db:MMP07270366	Bacilli	Bacillaceae	§gtdb:GCF_000691165.1	Bacillus	Bacteria|Firmicutes|Bacilli|Bacillales|Bacillaceae|Bacillus|Bacillus safensis	Bacteria	Bacillales	Bacillus safensis§taxonomy:561879	Firmicutes	Unclassified	13L_LOBSAL	0	0	125	3715	0.0336474	MarDB
GCF_000236535.2	/data2/marine_genomes_and_metagenomes/genomes_The_MAR_databases/prodigal_short/firmicutes/Lactococcus_garvieae_LG9_GCF_000236535.2.fas	§insdc.gca:GCA_000236535.3	§mmp.db:MMP02471888	Bacilli	Streptococcaceae	§gtdb:GCF_000269925.1	Lactococcus	Bacteria|Firmicutes|Bacilli|Lactobacillales|Streptococcaceae|Lactococcus|Lactococcus garvieae	Bacteria	Lactobacillales	Lactococcus garvieae LG9§taxonomy:1091039	Firmicutes	Lactococcus garvieae	LG9	0	0	379	2137	0.177351	MarDB
GCF_000212475.1	/data2/marine_genomes_and_metagenomes/genomes_The_MAR_databases/prodigal_short/firmicutes/Lactococcus_garvieae_UNIUD074_GCF_000212475.1.fas	§insdc.gca:GCA_000212475.2	§mmp.db:MMP02471926	Bacilli	Streptococcaceae	§gtdb:GCF_000269925.1	Lactococcus	Bacteria|Firmicutes|Bacilli|Lactobacillales|Streptococcaceae|Lactococcus|Lactococcus garvieae	Bacteria	Lactobacillales	Lactococcus garvieae UNIUD074§taxonomy:1017266	Firmicutes	Lactococcus garvieae	UNIUD074	0	0	340	2159	0.15748	MarDB
GCF_003061505.1	/data2/marine_genomes_and_metagenomes/genomes_The_MAR_databases/prodigal_short/firmicutes/Geobacillus_thermodenitrificans_OS27_GCF_003061505.1.fas	§insdc.gca:GCA_003061505.1	§mmp.db:MMP08135953	Bacilli	Bacillaceae	§gtdb:GCF_000496575.1	Geobacillus	Bacteria|Firmicutes|Bacilli|Bacillales|Anoxybacillaceae|Geobacillus|Geobacillus thermodenitrificans	Bacteria	Bacillales	Geobacillus thermodenitrificans§taxonomy:33940	Firmicutes	Geobacillus thermodenitrificans	OS27	0	0	140	3497	0.0400343	MarDB
GCF_001730685.1	/data2/marine_genomes_and_metagenomes/genomes_The_MAR_databases/prodigal_short/firmicutes/Caloranaerobacter_ferrireducens_DY22619_GCF_001730685.1.fas	§insdc.gca:GCA_001730685.1	§mmp.db:MMP05567320	Clostridia	Clostridiaceae	§gtdb:GCF_001730685.1	Caloranaerobacter	Bacteria|Firmicutes_A|Clostridia|Tissierellales|Caloranaerobacteraceae|Caloranaerobacter|Caloranaerobacter ferrireducens	Bacteria	Clostridiales	Caloranaerobacter ferrireducens§taxonomy:1323370	Firmicutes	Unclassified	DY22619	0	0	107	2447	0.043727	MarDB
GCF_001015055.1	/data2/marine_genomes_and_metagenomes/genomes_The_MAR_databases/prodigal_short/firmicutes/Aneurinibacillus_tyrosinisolvens_LL-002_GCF_001015055.1.fas	§insdc.gca:GCA_001015055.1	§mmp.db:MMP00028761	Bacilli	Paenibacillaceae	§gtdb:GCF_001015055.1	Aneurinibacillus	Bacteria|Firmicutes_I|Bacilli_A|Aneurinibacillales|Aneurinibacillaceae|Aneurinibacillus_A|Aneurinibacillus_A tyrosinisolvens	Bacteria	Bacillales	Aneurinibacillus tyrosinisolvens§taxonomy:1443435	Firmicutes	Unclassified	LL-002	0	0	384	6079	0.0631683	MarDB
GCF_900095905.1	/data2/marine_genomes_and_metagenomes/genomes_The_MAR_databases/prodigal_short/firmicutes/Clostridioides_difficile_CD105HS27_GCF_900095905.1.fas	§insdc.gca:GCA_900095905.1	§mmp.db:MMP4071729	Clostridia	Peptostreptococcaceae	§gtdb:GCF_000438845.1	Clostridioides	Bacteria|Firmicutes_A|Clostridia|Peptostreptococcales|Peptostreptococcaceae|Clostridioides|Clostridioides difficile	Bacteria	Clostridiales	Clostridioides difficile§taxonomy:1496	Firmicutes	Clostridioides difficile	CD105HS27	0	0	158	3624	0.0435982	MarDB
GCF_002021695.1	/data2/marine_genomes_and_metagenomes/genomes_The_MAR_databases/prodigal_short/firmicutes/Bacillus_cereus_WH2015_GCF_002021695.1.fas	§insdc.gca:GCA_002021695.1	§mmp.db:MMP04251492	Bacilli	Bacillaceae	§gtdb:GCF_000181835.1	Bacillus	Bacteria|Firmicutes|Bacilli|Bacillales|Bacillaceae_G|Bacillus_A|Bacillus_A anthracis	Bacteria	Bacillales	Bacillus cereus§taxonomy:1396	Firmicutes	Unclassified	WH2015	0	0	328	6044	0.0542687	MarDB
GCF_002798035.1	/data2/marine_genomes_and_metagenomes/genomes_The_MAR_databases/prodigal_short/firmicutes/Clostridium_botulinum_Hazen_GCF_002798035.1.fas	§insdc.gca:GCA_002798035.1	§mmp.db:MMP07446612	Clostridia	Clostridiaceae	§gtdb:GCF_000827935.1	Clostridium	Bacteria|Firmicutes_A|Clostridia|Clostridiales|Clostridiaceae|Clostridium|Clostridium botulinum_A	Bacteria	Clostridiales	Clostridium botulinum§taxonomy:1491	Firmicutes	Unclassified	Hazen	0	0	198	3554	0.0557119	MarDB
GCF_001730235.1	/data2/marine_genomes_and_metagenomes/genomes_The_MAR_databases/prodigal_short/firmicutes/Vulcanibacillus_modesticaldus_BR_GCF_001730235.1.fas	§insdc.gca:GCA_001730235.1	§mmp.db:MMP05731676	Bacilli	Bacillaceae	§gtdb:GCF_001730235.1	Vulcanibacillus	Bacteria|Firmicutes_I|Bacilli_A|Tepidibacillales|Tepidibacillaceae|Vulcanibacillus|Vulcanibacillus modesticaldus	Bacteria	Bacillales	Vulcanibacillus modesticaldus§taxonomy:337097	Firmicutes	Unclassified	BR	0	0	156	2321	0.0672124	MarDB
GCF_002811125.1	/data2/marine_genomes_and_metagenomes/genomes_The_MAR_databases/prodigal_short/firmicutes/Bacillus_vallismortis_TD3_GCF_002811125.1.fas	§insdc.gca:GCA_002811125.1	§mmp.db:MMP07692404	Bacilli	Bacillaceae	§gtdb:GCA_000245315.1	Bacillus	Bacteria|Firmicutes|Bacilli|Bacillales|Bacillaceae|Bacillus|Bacillus vallismortis	Bacteria	Bacillales	Bacillus vallismortis§taxonomy:72361	Firmicutes	Unclassified	TD3	0	0	131	4018	0.0326033	MarDB
GCF_001884025.1	/data2/marine_genomes_and_metagenomes/genomes_The_MAR_databases/prodigal_short/firmicutes/Bacillus_pacificus_EB422_GCF_001884025.1.fas	§insdc.gca:GCA_001884025.1	§mmp.db:MMP05231547	Bacilli	Bacillaceae	§gtdb:GCF_002214725.1	Bacillus	Bacteria|Firmicutes|Bacilli|Bacillales|Bacillaceae_G|Bacillus_A|Bacillus_A cereus_AD	Bacteria	Bacillales	1120337	Firmicutes	Unclassified	EB422|MCCC 1A06182	0	0	214	5589	0.0382895	MarDB
GCF_001561955.1	/data2/marine_genomes_and_metagenomes/genomes_The_MAR_databases/prodigal_short/firmicutes/Anaerotignum_propionicum_DSM_1682_X2_GCF_001561955.1.fas	§insdc.gca:GCA_001561955.1	§mmp.ref:MMP04437875	Clostridia	Lachnospiraceae	§gtdb:GCF_001561955.1	Anaerotignum	Bacteria|Firmicutes_A|Clostridia|Lachnospirales|Anaerotignaceae|Anaerotignum|Anaerotignum	Bacteria	Clostridiales	Anaerotignum propionicum DSM 1682§taxonomy:991789	Firmicutes	Anaerotignum propionicum	X2	0	0	106	2951	0.03592	MarRef
GCF_001482475.1	/data2/marine_genomes_and_metagenomes/genomes_The_MAR_databases/prodigal_short/firmicutes/Bacillus_sp._G1(2015b)_GCF_001482475.1.fas	§insdc.gca:GCA_001482475.1	§mmp.db:MMP03976074	Bacilli	Bacillaceae	§gtdb:GCF_000691165.1	Bacillus	Bacteria|Firmicutes|Bacilli|Bacillales|Bacillaceae|Bacillus|Bacillus safensis	Bacteria	Bacillales	Bacillus sp. G1(2015b)§taxonomy:1706732	Firmicutes	Unclassified	G1(2015b)	0	0	93	3748	0.0248132	MarDB
GCF_003458115.1	/data2/marine_genomes_and_metagenomes/genomes_The_MAR_databases/prodigal_short/firmicutes/Bacillus_sp._ISO11_GCF_003458115.1.fas	§insdc.gca:GCA_003458115.1	§mmp.db:MMP09920664	Bacilli	Bacillaceae	§gtdb:GCF_002148155.1	Bacillus	Bacteria|Firmicutes|Bacilli|Bacillales|Bacillaceae_G|Bacillus_A|Bacillus_A thuringiensis_J	Bacteria	Bacillales	Bacillus sp. ISO11§taxonomy:1826752	Firmicutes	Bacillus sp. ISO11	ISO11	0	0	259	5984	0.0432821	MarDB
GCF_001700275.1	/data2/marine_genomes_and_metagenomes/genomes_The_MAR_databases/prodigal_short/firmicutes/Bacillus_badius_SGD-V-25_GCF_001700275.1.fas	§insdc.gca:GCA_001700275.1	§mmp.db:MMP04489741	Bacilli	Bacillaceae	§gtdb:GCF_001591605.1	Bacillus	Bacteria|Firmicutes|Bacilli|Bacillales|Domibacillaceae|Bacillus_N|Bacillus_N badius	Bacteria	Bacillales	1414647	Firmicutes	Unclassified	SGD-V-25|NCIM 5513|DSM 28241	0	0	107	3936	0.027185	MarDB
GCF_000775595.1	/data2/marine_genomes_and_metagenomes/genomes_The_MAR_databases/prodigal_short/firmicutes/Pontibacillus_halophilus_JSM_076056_=_DSM_19796_JSM_076056_GCF_000775595.1.fas	§insdc.gca:GCA_000775595.1	§mmp.db:MMP03177050	Bacilli	Bacillaceae	§gtdb:GCF_000425205.1	Pontibacillus	Bacteria|Firmicutes|Bacilli|Bacillales|Halobacillaceae_A|Pontibacillus_A|Pontibacillus_A halophilus	Bacteria	Bacillales	Pontibacillus halophilus JSM 076056 = DSM 19796§taxonomy:1385510	Firmicutes	Pontibacillus halophilus	JSM 076056	0	0	88	3600	0.0244444	MarDB
GCF_001592825.1	/data2/marine_genomes_and_metagenomes/genomes_The_MAR_databases/prodigal_short/firmicutes/Planococcus_maritimus_MKU009_GCF_001592825.1.fas	§insdc.gca:GCA_001592825.1	§mmp.db:MMP04511041	Bacilli	Planococcaceae	§gtdb:GCF_001592825.1	Planococcus	Bacteria|Firmicutes|Bacilli|Bacillales_A|Planococcaceae|Planococcus_B|Planococcus_B maritimus_B	Bacteria	Bacillales	Planococcus maritimus§taxonomy:192421	Firmicutes	Unclassified	MKU009	0	0	111	3264	0.0340074	MarDB
GCF_000473245.1	/data2/marine_genomes_and_metagenomes/genomes_The_MAR_databases/prodigal_short/firmicutes/Bacillus_infantis_NRRL_B-14911_GCF_000473245.1.fas	§insdc.gca:GCA_000473245.1	§mmp.ref:MMP02604281	Bacilli	Bacillaceae	§gtdb:GCF_000473245.1	Bacillus	Bacteria|Firmicutes|Bacilli|Bacillales|Bacillaceae_A|Bacillus_AB|Bacillus_AB infantis	Bacteria	Bacillales	Bacillus infantis NRRL B-14911§taxonomy:1367477	Firmicutes	Bacillus infantis	NRRL B-14911	0	0	124	4837	0.0256357	MarRef
GCF_001975785.1	/data2/marine_genomes_and_metagenomes/genomes_The_MAR_databases/prodigal_short/firmicutes/Domibacillus_epiphyticus_SAB_38_GCF_001975785.1.fas	§insdc.gca:GCA_001975785.1	§mmp.db:MMP06134625	Bacilli	Bacillaceae	§gtdb:GCF_001975785.1	Domibacillus	Bacteria|Firmicutes|Bacilli|Bacillales|Domibacillaceae|Domibacillus|Domibacillus epiphyticus	Bacteria	Bacillales	Domibacillus epiphyticus§taxonomy:1714355	Firmicutes	Unclassified	SAB 38	0	0	105	3279	0.032022	MarDB
GCF_000320305.1	/data2/marine_genomes_and_metagenomes/genomes_The_MAR_databases/prodigal_short/firmicutes/Enterococcus_faecalis_OG1X_GCF_000320305.1.fas	§insdc.gca:GCA_000320305.1	§mmp.db:MMP02471974	Bacilli	Enterococcaceae	§gtdb:GCF_000392875.1	Enterococcus	Bacteria|Firmicutes|Bacilli|Lactobacillales|Enterococcaceae|Enterococcus|Enterococcus faecalis	Bacteria	Lactobacillales	Enterococcus faecalis OG1X§taxonomy:1027372	Firmicutes	Enterococcus faecalis	OG1X	0	0	116	2597	0.0446669	MarDB
GCF_002141115.1	/data2/marine_genomes_and_metagenomes/genomes_The_MAR_databases/prodigal_short/firmicutes/Enterococcus_faecium_11F9_MSG5001_GCF_002141115.1.fas	§insdc.gca:GCA_002141115.1	§mmp.db:MMP04634038	Bacilli	Enterococcaceae	§gtdb:GCA_003269465.1	Enterococcus	Bacteria|Firmicutes|Bacilli|Lactobacillales|Enterococcaceae|Enterococcus_B|Enterococcus_B faecium_B	Bacteria	Lactobacillales	Enterococcus faecium§taxonomy:1352	Firmicutes	Unclassified	11F9_MSG5001	0	0	107	2575	0.0415534	MarDB
GCF_000016165.1	/data2/marine_genomes_and_metagenomes/genomes_The_MAR_databases/prodigal_short/firmicutes/Desulfotomaculum_reducens_MI-1_GCF_000016165.1.fas	§insdc.gca:GCA_000016165.1	§mmp.ref:MMP02598304	Clostridia	Peptococcaceae	§gtdb:GCF_000016165.1	Desulfotomaculum	Bacteria|Firmicutes_B|Desulfotomaculia|Desulfotomaculales|Desulfotomaculaceae|Desulfotomaculum_H|Desulfotomaculum_H reducens	Bacteria	Clostridiales	Desulfotomaculum reducens MI-1§taxonomy:349161	Firmicutes	Desulfotomaculum reducens	MI-1	0	0	143	3550	0.0402817	MarRef
GCF_900107115.1	/data2/marine_genomes_and_metagenomes/genomes_The_MAR_databases/prodigal_short/firmicutes/Salimicrobium_album_DSM_20748_GCF_900107115.1.fas	§insdc.gca:GCA_900107115.1	§mmp.db:MMP04488081	Bacilli	Bacillaceae	§gtdb:GCF_900107115.1	Salimicrobium	Bacteria|Firmicutes|Bacilli|Bacillales|Halobacillaceae|Salimicrobium|Salimicrobium album	Bacteria	Bacillales	Salimicrobium album§taxonomy:50717	Firmicutes	Unclassified	HK 733|DSM 20748|ATCC 49811|CCM 3517|IAM 12845|JCM 2574	0	0	58	2667	0.0217473	MarDB
GCF_002412145.1	/data2/marine_genomes_and_metagenomes/genomes_The_MAR_databases/prodigal_short/firmicutes/Brevibacillus_laterosporus_Lak_1210_GCF_002412145.1.fas	§insdc.gca:GCA_002412145.1	§mmp.db:MMP06759470	Bacilli	Paenibacillaceae	§gtdb:GCF_000219535.2	Brevibacillus	Bacteria|Firmicutes_I|Bacilli_A|Brevibacillales|Brevibacillaceae|Brevibacillus_B|Brevibacillus_B laterosporus_C	Bacteria	Bacillales	Brevibacillus laterosporus§taxonomy:1465	Firmicutes	Unclassified	Lak 1210	0	0	167	4567	0.0365667	MarDB
GCF_000750515.1	/data2/marine_genomes_and_metagenomes/genomes_The_MAR_databases/prodigal_short/firmicutes/Weissella_ceti_WS74_GCF_000750515.1.fas	§insdc.gca:GCA_000750515.1	§mmp.ref:MMP02947894	Bacilli	Leuconostocaceae	§gtdb:GCF_000750535.1	Weissella	Bacteria|Firmicutes|Bacilli|Lactobacillales|Lactobacillaceae|Weissella|Weissella ceti	Bacteria	Lactobacillales	Weissella ceti§taxonomy:759620	Firmicutes	Weissella ceti	WS74	0	0	51	1359	0.0375276	MarRef
GCF_900094955.1	/data2/marine_genomes_and_metagenomes/genomes_The_MAR_databases/prodigal_short/firmicutes/Fictibacillus_enclensis_NIO-1003_GCF_900094955.1.fas	§insdc.gca:GCA_900094955.1	§mmp.db:MMP04487808	Bacilli	Bacillaceae	§gtdb:GCF_001457035.1	Fictibacillus	Bacteria|Firmicutes|Bacilli|Bacillales|Fictibacillaceae|Fictibacillus_C|Fictibacillus_C enclensis	Bacteria	Bacillales	Fictibacillus enclensis§taxonomy:1017270	Firmicutes	Unclassified	NIO-1003	0	0	108	4605	0.0234528	MarDB
GCF_000761095.1	/data2/marine_genomes_and_metagenomes/genomes_The_MAR_databases/prodigal_short/firmicutes/Caloranaerobacter_azorensis_H53214_GCF_000761095.1.fas	§insdc.gca:GCA_000761095.1	§mmp.db:MMP02950964	Clostridia	Clostridiaceae	§gtdb:GCF_900129995.1	Caloranaerobacter	Bacteria|Firmicutes_A|Clostridia|Tissierellales|Caloranaerobacteraceae|Caloranaerobacter|Caloranaerobacter azorensis	Bacteria	Clostridiales	Caloranaerobacter azorensis H53214§taxonomy:1156417	Firmicutes	Caloranaerobacter azorensis	H53214	0	0	165	2428	0.0679572	MarDB
GCF_001710555.1	/data2/marine_genomes_and_metagenomes/genomes_The_MAR_databases/prodigal_short/firmicutes/Listeria_monocytogenes_OCF58_GCF_001710555.1.fas	§insdc.gca:GCA_001710555.1	§mmp.db:MMP05410695	Bacilli	Listeriaceae	§gtdb:GCF_900187225.1	Listeria	Bacteria|Firmicutes|Bacilli|Lactobacillales|Listeriaceae|Listeria|Listeria monocytogenes	Bacteria	Bacillales	Listeria monocytogenes§taxonomy:1639	Firmicutes	Unclassified	OCF58	0	0	54	2880	0.01875	MarDB
GCF_900113335.1	/data2/marine_genomes_and_metagenomes/genomes_The_MAR_databases/prodigal_short/firmicutes/Desulfallas_arcticus_DSM_17038_GCF_900113335.1.fas	§insdc.gca:GCA_900113335.1	§mmp.db:MMP05660649	Clostridia	Peptococcaceae	§gtdb:GCF_900113335.1	Desulfotomaculum	Bacteria|Firmicutes_B|Desulfotomaculia|Desulfotomaculales|Desulfotomaculaceae_A|Desulfotomaculum_C|Desulfotomaculum_C arcticum	Bacteria	Clostridiales	Desulfallas arcticus§taxonomy:341036	Firmicutes	Desulfotomaculum arcticum	15|DSM 17038|JCM 12923	0	0	311	5126	0.0606711	MarDB
GCF_003722215.1	/data2/marine_genomes_and_metagenomes/genomes_The_MAR_databases/prodigal_short/firmicutes/Erysipelothrix_rhusiopathiae_KC-Sb-R1_GCF_003722215.1.fas	§insdc.gca:GCA_003722215.1	§mmp.ref:MMP10373677	Erysipelotrichia	Erysipelotrichaceae	§gtdb:GCF_000160815.2	Erysipelothrix	Bacteria|Firmicutes|Bacilli|Erysipelotrichales|Erysipelotrichaceae|Erysipelothrix|Erysipelothrix rhusiopathiae	Bacteria	Erysipelotrichales	Erysipelothrix rhusiopathiae§taxonomy:1648	Firmicutes	Erysipelothrix rhusiopathiae	KC-Sb-R1	0	0	129	1667	0.0773845	MarRef
GCF_003583315.1	/data2/marine_genomes_and_metagenomes/genomes_The_MAR_databases/prodigal_short/firmicutes/Bacillus_licheniformis_DMTMMB10_GCF_003583315.1.fas	§insdc.gca:GCA_003583315.1	§mmp.db:MMP09932323	Bacilli	Bacillaceae	§gtdb:GCF_000011645.1	Bacillus	Bacteria|Firmicutes|Bacilli|Bacillales|Bacillaceae|Bacillus|Bacillus licheniformis	Bacteria	Bacillales	Bacillus licheniformis§taxonomy:1402	Firmicutes	Bacillus licheniformis	DMTMMB10	0	0	141	4442	0.0317425	MarDB
GCF_900101525.1	/data2/marine_genomes_and_metagenomes/genomes_The_MAR_databases/prodigal_short/firmicutes/Marinilactibacillus_psychrotolerans_DSM_19582_GCF_900101525.1.fas	§insdc.gca:GCA_900101525.1	§mmp.db:MMP04488013	Bacilli	Carnobacteriaceae	§gtdb:GCF_900101525.1	Marinilactibacillus	Bacteria|Firmicutes|Bacilli|Lactobacillales|Carnobacteriaceae|Marinilactibacillus|Marinilactibacillus psychrotolerans	Bacteria	Lactobacillales	Marinilactibacillus psychrotolerans§taxonomy:191770	Firmicutes	Unclassified	DSM 19582|IAM 14980|NBRC 100002|NCIMB 13873	0	0	108	2415	0.0447205	MarDB
GCF_001884135.1	/data2/marine_genomes_and_metagenomes/genomes_The_MAR_databases/prodigal_short/firmicutes/Bacillus_nitratireducens_4049_GCF_001884135.1.fas	§insdc.gca:GCA_001884135.1	§mmp.db:MMP05231546	Bacilli	Bacillaceae	§gtdb:GCF_000399165.1	Bacillus	Bacteria|Firmicutes|Bacilli|Bacillales|Bacillaceae_G|Bacillus_A|Bacillus_A cereus_P	Bacteria	Bacillales	1866311	Firmicutes	Unclassified	Hydrocotyle sibthorpioides§taxonomy:4049	0	0	216	5635	0.0383319	MarDB
GCF_000750065.1	/data2/marine_genomes_and_metagenomes/genomes_The_MAR_databases/prodigal_short/firmicutes/Clostridium_botulinum_DB-2_GCF_000750065.1.fas	§insdc.gca:GCA_000750065.1	§mmp.db:MMP03012839	Clostridia	Clostridiaceae	§gtdb:GCF_000020165.1	Clostridium	Bacteria|Firmicutes_A|Clostridia|Clostridiales|Clostridiaceae|Clostridium|Clostridium botulinum_B	Bacteria	Clostridiales	Clostridium botulinum§taxonomy:1491	Firmicutes	Unclassified	DB-2	0	0	228	3691	0.0617719	MarDB
GCF_000294775.2	/data2/marine_genomes_and_metagenomes/genomes_The_MAR_databases/prodigal_short/firmicutes/Cytobacillus_oceanisediminis_2691_GCF_000294775.2.fas	§insdc.gca:GCA_000294775.2	§mmp.db:MMP02470179	Bacilli	Bacillaceae	§gtdb:GCF_000294775.2	Bacillus	Bacteria|Firmicutes|Bacilli|Bacillales|Bacillaceae_A|Bacillus_AA|Bacillus_AA oceanisediminis_B	Bacteria	Bacillales	Bacillus oceanisediminis 2691§taxonomy:1196031	Firmicutes	Bacillus oceanisediminis	2691	0	0	152	5892	0.0257977	MarDB
GCF_000756615.1	/data2/marine_genomes_and_metagenomes/genomes_The_MAR_databases/prodigal_short/firmicutes/Paenibacillus_durus_DSM_1735_GCF_000756615.1.fas	§insdc.gca:GCA_000756615.1	§mmp.ref:MMP03010338	Bacilli	Paenibacillaceae	§gtdb:GCF_000756615.1	Paenibacillus	Bacteria|Firmicutes_I|Bacilli_A|Paenibacillales|Paenibacillaceae|Paenibacillus|Paenibacillus durus	Bacteria	Bacillales	Paenibacillus durus§taxonomy:44251	Firmicutes	Paenibacillus durus	VPI 6563-1|DSM 1735|ATCC 27763|LMG 15707	0	0	248	5436	0.0456218	MarRef
GCF_002097535.1	/data2/marine_genomes_and_metagenomes/genomes_The_MAR_databases/prodigal_short/firmicutes/Halobacillus_mangrovi_KTB_131_GCF_002097535.1.fas	§insdc.gca:GCA_002097535.1	§mmp.ref:MMP06640208	Bacilli	Bacillaceae	§gtdb:GCF_002097535.1	Halobacillus	Bacteria|Firmicutes|Bacilli|Bacillales|Halobacillaceae|Halobacillus|Halobacillus mangrovi	Bacteria	Bacillales	Halobacillus mangrovi§taxonomy:402384	Firmicutes	Unclassified	KTB 131	0	0	66	4115	0.0160389	MarRef
GCF_900099895.1	/data2/marine_genomes_and_metagenomes/genomes_The_MAR_databases/prodigal_short/firmicutes/Paenibacillus_naphthalenovorans_PR-N1_GCF_900099895.1.fas	§insdc.gca:GCA_900099895.1	§mmp.db:MMP05421868	Bacilli	Paenibacillaceae	§gtdb:GCF_900099895.1	Paenibacillus	Bacteria|Firmicutes_I|Bacilli_A|Paenibacillales|Paenibacillaceae|Paenibacillus_G|Paenibacillus_G naphthalenovorans	Bacteria	Bacillales	Paenibacillus naphthalenovorans§taxonomy:162209	Firmicutes	Unclassified	PR-N1|DSM 14203|ATCC BAA-206	0	0	185	5205	0.0355427	MarDB
GCF_000171855.1	/data2/marine_genomes_and_metagenomes/genomes_The_MAR_databases/prodigal_short/firmicutes/Carnobacterium_sp._AT7_GCF_000171855.1.fas	§insdc.gca:GCA_000171855.1	§mmp.db:MMP02436145	Bacilli	Carnobacteriaceae	§gtdb:GCF_000745125.1	Carnobacterium	Bacteria|Firmicutes|Bacilli|Lactobacillales|Carnobacteriaceae|Carnobacterium_A|Carnobacterium_A jeotgali	Bacteria	Lactobacillales	Carnobacterium sp. AT7§taxonomy:333990	Firmicutes	Unclassified	AT7	0	0	142	2337	0.0607617	MarDB
GCF_003312895.1	/data2/marine_genomes_and_metagenomes/genomes_The_MAR_databases/prodigal_short/firmicutes/Bacillus_amyloliquefaciens_SH-B74_GCF_003312895.1.fas	§insdc.gca:GCA_003312895.1	§mmp.ref:MMP09428134	Bacilli	Bacillaceae	§gtdb:GCF_001461825.1	Bacillus	Bacteria|Firmicutes|Bacilli|Bacillales|Bacillaceae|Bacillus|Bacillus velezensis	Bacteria	Bacillales	Bacillus amyloliquefaciens§taxonomy:1390	Firmicutes	Bacillus amyloliquefaciens	SH-B74	0	0	126	4025	0.0313043	MarRef
GCF_001310635.1	/data2/marine_genomes_and_metagenomes/genomes_The_MAR_databases/prodigal_short/firmicutes/Bacillus_sp._JCM_19034_GCF_001310635.1.fas	§insdc.gca:GCA_001310635.1	§mmp.db:MMP00000372	Bacilli	Bacillaceae	§gtdb:GCF_001310635.1	Bacillus	Bacteria|Firmicutes|Bacilli|Bacillales|Bacillaceae_D|Bacillus_L|Bacillus_L sp001310635	Bacteria	Bacillales	Bacillus sp. JCM 19034§taxonomy:1481928	Firmicutes	Unclassified	JCM 19034	0	0	819	4924	0.166328	MarDB
GCF_003047225.1	/data2/marine_genomes_and_metagenomes/genomes_The_MAR_databases/prodigal_short/firmicutes/Bacillus_sp._Y-01_GCF_003047225.1.fas	§insdc.gca:GCA_003047225.1	§mmp.ref:MMP07838500	Bacilli	Bacillaceae	§gtdb:GCF_000832985.1	Bacillus	Bacteria|Firmicutes|Bacilli|Bacillales|Bacillaceae_H|Bacillus_C|Bacillus_C megaterium	Bacteria	Bacillales	Bacillus sp. Y-01§taxonomy:2052936	Firmicutes	Unclassified	Y-01	0	0	158	5250	0.0300952	MarRef
GCF_000712595.1	/data2/marine_genomes_and_metagenomes/genomes_The_MAR_databases/prodigal_short/firmicutes/Bacillus_manliponensis_JCM_15802_GCF_000712595.1.fas	§insdc.gca:GCA_000712595.1	§mmp.db:MMP02854473	Bacilli	Bacillaceae	§gtdb:GCF_000712595.1	Bacillus	Bacteria|Firmicutes|Bacilli|Bacillales|Bacillaceae_G|Bacillus_A|Bacillus_A manliponensis	Bacteria	Bacillales	Bacillus manliponensis§taxonomy:574376	Firmicutes	Unclassified	0	0	0	194	4854	0.039967	MarDB
GCF_000300535.1	/data2/marine_genomes_and_metagenomes/genomes_The_MAR_databases/prodigal_short/firmicutes/Bacillus_xiamenensis_HYC-10_GCF_000300535.1.fas	§insdc.gca:GCA_000300535.1	§mmp.db:MMP02471164	Bacilli	Bacillaceae	§gtdb:GCF_000300535.1	Bacillus	Bacteria|Firmicutes|Bacilli|Bacillales|Bacillaceae|Bacillus|Bacillus xiamenensis	Bacteria	Bacillales	Bacillus xiamenensis§taxonomy:1178537	Firmicutes	Unclassified	0	0	0	121	3742	0.0323356	MarDB
GCF_009363835.1	/data2/marine_genomes_and_metagenomes/genomes_The_MAR_databases/prodigal_short/firmicutes/Bacillus_subtilis_JAAA_GCF_009363835.1.fas	§insdc.gca:GCA_009363835.1	§mmp.ref:MMP13053465	Bacilli	Bacillaceae	§gtdb:GCF_000009045.1	Bacillus	Bacteria|Firmicutes|Bacilli|Bacillales|Bacillaceae|Bacillus|Bacillus	Bacteria	Bacillales	Bacillus subtilis§taxonomy:1423	Firmicutes	Bacillus subtilis	JAAA	0	0	193	4481	0.0430707	MarRef
GCF_008041975.1	/data2/marine_genomes_and_metagenomes/genomes_The_MAR_databases/prodigal_short/firmicutes/Bacillus_cereus_G1-1_GCF_008041975.1.fas	§insdc.gca:GCA_008041975.1	§mmp.ref:MMP11621489	Bacilli	Bacillaceae	§gtdb:GCF_000007825.1	Bacillus	Bacteria|Firmicutes|Bacilli|Bacillales|Bacillaceae_G|Bacillus_A|Bacillus_A	Bacteria	Bacillales	Bacillus cereus§taxonomy:1396	Firmicutes	Bacillus cereus	G1-1	0	0	205	5933	0.0345525	MarRef
GCF_001888505.1	/data2/marine_genomes_and_metagenomes/genomes_The_MAR_databases/prodigal_short/firmicutes/Lactiplantibacillus_plantarum_MHO2.9_GCF_001888505.1.fas	§insdc.gca:GCA_001888505.1	§mmp.db:MMP03654492	Bacilli	Lactobacillaceae	§gtdb:GCA_000615325.1	Lactobacillus	Bacteria|Firmicutes|Bacilli|Lactobacillales|Lactobacillaceae|Lactobacillus_F|Lactobacillus_F plantarum	Bacteria	Lactobacillales	Lactiplantibacillus plantarum§taxonomy:1590	Firmicutes	Unclassified	MHO2.9	0	0	222	3228	0.0687732	MarDB
GCF_001541985.1	/data2/marine_genomes_and_metagenomes/genomes_The_MAR_databases/prodigal_short/firmicutes/Bacillus_mycoides_PE8-15_GCF_001541985.1.fas	§insdc.gca:GCA_001541985.1	§mmp.db:MMP04432437	Bacilli	Bacillaceae	§gtdb:GCF_000832605.1	Bacillus	Bacteria|Firmicutes|Bacilli|Bacillales|Bacillaceae_G|Bacillus_A|Bacillus_A mycoides	Bacteria	Bacillales	Bacillus mycoides§taxonomy:1405	Firmicutes	Unclassified	PE815	0	0	250	5994	0.0417084	MarDB
GCF_001711145.1	/data2/marine_genomes_and_metagenomes/genomes_The_MAR_databases/prodigal_short/firmicutes/Listeria_monocytogenes_OCF54_GCF_001711145.1.fas	§insdc.gca:GCA_001711145.1	§mmp.db:MMP05410694	Bacilli	Listeriaceae	§gtdb:GCF_000307025.1	Listeria	Bacteria|Firmicutes|Bacilli|Lactobacillales|Listeriaceae|Listeria|Listeria monocytogenes_B	Bacteria	Bacillales	Listeria monocytogenes§taxonomy:1639	Firmicutes	Unclassified	OCF54	0	0	72	2850	0.0252632	MarDB
GCF_001293645.1	/data2/marine_genomes_and_metagenomes/genomes_The_MAR_databases/prodigal_short/firmicutes/Bacillus_sp._CHD6a_GCF_001293645.1.fas	§insdc.gca:GCA_001293645.1	§mmp.db:MMP03488035	Bacilli	Bacillaceae	§gtdb:GCF_001293645.1	Bacillus	Bacteria|Firmicutes|Bacilli|Bacillales|Bacillaceae_I|Bacillus_G|Bacillus_G sp001293645	Bacteria	Bacillales	Bacillus sp. CHD6a§taxonomy:1643452	Firmicutes	Unclassified	CHD6a	0	0	84	4006	0.0209685	MarDB
GCF_001645775.1	/data2/marine_genomes_and_metagenomes/genomes_The_MAR_databases/prodigal_short/firmicutes/Lactococcus_garvieae_PAQ102015-99_GCF_001645775.1.fas	§insdc.gca:GCA_001645775.1	§mmp.db:MMP04958039	Bacilli	Streptococcaceae	§gtdb:GCF_002154895.1	Lactococcus	Bacteria|Firmicutes|Bacilli|Lactobacillales|Streptococcaceae|Lactococcus|Lactococcus petauri	Bacteria	Lactobacillales	Lactococcus garvieae§taxonomy:1363	Firmicutes	Unclassified	PAQ102015-99	0	0	299	1959	0.152629	MarDB
GCF_001644195.2	/data2/marine_genomes_and_metagenomes/genomes_The_MAR_databases/prodigal_short/firmicutes/Bacillus_marinisedimentorum_NC2-31_GCF_001644195.2.fas	§insdc.gca:GCA_001644195.2	§mmp.db:MMP04585482	Bacilli	Bacillaceae	§gtdb:GCF_001644195.2	Bacillus	Bacteria|Firmicutes|Bacilli|Bacillales|Bacillaceae_O|Bacillus_BL|Bacillus_BL marinisedimentorum	Bacteria	Bacillales	Bacillus marinisedimentorum§taxonomy:1821260	Firmicutes	Unclassified	NC2-31	0	0	124	4168	0.0297505	MarDB
GCF_001456935.1	/data2/marine_genomes_and_metagenomes/genomes_The_MAR_databases/prodigal_short/firmicutes/Bacillus_enclensis_SGD-1123_GCF_001456935.1.fas	§insdc.gca:GCA_001456935.1	§mmp.db:MMP04263896	Bacilli	Bacillaceae	§gtdb:GCF_001456935.1	Bacillus	Bacteria|Firmicutes|Bacilli|Bacillales|Bacillaceae_B|Bacillus_F|Bacillus_F enclensis	Bacteria	Bacillales	Bacillus enclensis§taxonomy:1402860	Firmicutes	Unclassified	SGD-1123	0	0	86	4495	0.0191324	MarDB
GCF_001884235.1	/data2/marine_genomes_and_metagenomes/genomes_The_MAR_databases/prodigal_short/firmicutes/Bacillus_paramycoides_NH24A2_GCF_001884235.1.fas	§insdc.gca:GCA_001884235.1	§mmp.db:MMP05231634	Bacilli	Bacillaceae	§gtdb:GCF_000290855.1	Bacillus	Bacteria|Firmicutes|Bacilli|Bacillales|Bacillaceae_G|Bacillus_A|Bacillus_A cereus_Q	Bacteria	Bacillales	1866316	Firmicutes	Unclassified	NH24A2	0	0	276	5613	0.0491716	MarDB
GCF_000144645.1	/data2/marine_genomes_and_metagenomes/genomes_The_MAR_databases/prodigal_short/firmicutes/Thermosediminibacter_oceani_DSM_16646_GCF_000144645.1.fas	§insdc.gca:GCA_000144645.1	§mmp.ref:MMP00713558	Clostridia	Thermoanaerobacterales Family III. Incertae Sedis	§gtdb:GCF_000144645.1	Thermosediminibacter	Bacteria|Firmicutes_A|Thermovenabulia|Thermovenabulales|Thermovenabulaceae|Thermosediminibacter|Thermosediminibacter oceani	Bacteria	Thermoanaerobacterales	Thermosediminibacter oceani DSM 16646§taxonomy:555079	Firmicutes	Thermosediminibacter oceani	JW/IW-1228P|ATCC BAA-1034|DSM 16646	0	0	88	2312	0.0380623	MarRef
GCF_001006285.1	/data2/marine_genomes_and_metagenomes/genomes_The_MAR_databases/prodigal_short/firmicutes/Paraclostridium_benzoelyticum_JC272_GCF_001006285.1.fas	§insdc.gca:GCA_001006285.1	§mmp.db:MMP03396706	Clostridia	Peptostreptococcaceae	§gtdb:GCF_001006285.1	Paraclostridium	Bacteria|Firmicutes_A|Clostridia|Peptostreptococcales|Peptostreptococcaceae|Paraclostridium|Paraclostridium benzoelyticum	Bacteria	Clostridiales	Paraclostridium benzoelyticum§taxonomy:1629550	Firmicutes	Unclassified	JC272	0	0	230	3546	0.0648618	MarDB
GCF_000238575.1	/data2/marine_genomes_and_metagenomes/genomes_The_MAR_databases/prodigal_short/firmicutes/Carnobacterium_maltaromaticum_ATCC_35586_GCF_000238575.1.fas	§insdc.gca:GCA_000238575.2	§mmp.db:MMP02471708	Bacilli	Carnobacteriaceae	§gtdb:GCF_000744945.1	Carnobacterium	Bacteria|Firmicutes|Bacilli|Lactobacillales|Carnobacteriaceae|Carnobacterium|Carnobacterium maltaromaticum	Bacteria	Lactobacillales	Carnobacterium maltaromaticum ATCC 35586§taxonomy:1087479	Firmicutes	Carnobacterium maltaromaticum	B270	0	0	133	3391	0.0392215	MarDB
GCF_005671335.1	/data2/marine_genomes_and_metagenomes/genomes_The_MAR_databases/prodigal_short/firmicutes/Alkalihalobacillus_halodurans_LB-1_GCF_005671335.1.fas	§insdc.gca:GCA_005671335.1	§mmp.ref:MMP11621490	Bacilli	Bacillaceae	§gtdb:GCF_001274915.1	Bacillus	Bacteria|Firmicutes|Bacilli|Bacillales|Bacillaceae_D|Bacillus_M|Bacillus_M	Bacteria	Bacillales	Alkalihalobacillus halodurans§taxonomy:86665	Firmicutes	Bacillus halodurans	LB-1	0	0	88	4210	0.0209026	MarRef
GCF_900129915.1	/data2/marine_genomes_and_metagenomes/genomes_The_MAR_databases/prodigal_short/firmicutes/Tepidibacter_thalassicus_DSM_15285_GCF_900129915.1.fas	§insdc.gca:GCA_900129915.1	§mmp.db:MMP02744040	Clostridia	Peptostreptococcaceae	§gtdb:GCF_900129915.1	Tepidibacter	Bacteria|Firmicutes_A|Clostridia|Peptostreptococcales|Peptostreptococcaceae|Tepidibacter|Tepidibacter thalassicus	Bacteria	Clostridiales	Tepidibacter thalassicus DSM 15285§taxonomy:1123350	Firmicutes	Tepidibacter thalassicus	SC 562|DSM 15285|UNIQEM 215	0	0	129	2285	0.0564551	MarDB
GCF_000986795.1	/data2/marine_genomes_and_metagenomes/genomes_The_MAR_databases/prodigal_short/firmicutes/Salinicoccus_sediminis_SV-16_GCF_000986795.1.fas	§insdc.gca:GCA_000986795.1	§mmp.db:MMP03450945	Bacilli	Staphylococcaceae	§gtdb:GCF_000986795.1	Salinicoccus	Bacteria|Firmicutes|Bacilli|Staphylococcales|Salinicoccaceae|Salinicoccus|Salinicoccus sediminis	Bacteria	Bacillales	Salinicoccus sediminis§taxonomy:1432562	Firmicutes	Unclassified	SV-16	0	0	92	2612	0.0352221	MarDB
GCF_005577315.1	/data2/marine_genomes_and_metagenomes/genomes_The_MAR_databases/prodigal_short/firmicutes/Priestia_flexa_1-2-1_GCF_005577315.1.fas	§insdc.gca:GCA_005577315.1	§mmp.ref:MMP11621491	Bacilli	Bacillaceae	§gtdb:GCF_001591565.1	Bacillus	Bacteria|Firmicutes|Bacilli|Bacillales|Bacillaceae_H|Bacillus_C|Bacillus_C	Bacteria	Bacillales	Priestia flexa§taxonomy:86664	Firmicutes	Bacillus flexus	1/2/2001	0	0	152	4130	0.0368039	MarRef
GCF_001183525.1	/data2/marine_genomes_and_metagenomes/genomes_The_MAR_databases/prodigal_short/firmicutes/Bacillus_pumilus_RI06-95_GCF_001183525.1.fas	§insdc.gca:GCA_001183525.1	§mmp.db:MMP03329560	Bacilli	Bacillaceae	§gtdb:GCF_900186955.1	Bacillus	Bacteria|Firmicutes|Bacilli|Bacillales|Bacillaceae|Bacillus|Bacillus pumilus	Bacteria	Bacillales	Bacillus pumilus§taxonomy:1408	Firmicutes	Unclassified	RI06-95	0	0	84	3668	0.0229008	MarDB
GCF_008152325.1	/data2/marine_genomes_and_metagenomes/genomes_The_MAR_databases/prodigal_short/firmicutes/Crassaminicella_sp._SY095_GCF_008152325.1.fas	§insdc.gca:GCA_008152325.1	§mmp.ref:MMP12368985	Clostridia	Clostridiaceae	§gtdb:GCF_001282725.1	Crassaminicella	Bacteria|Firmicutes_A|Clostridia|Peptostreptococcales|Thermotaleaceae	Bacteria	Clostridiales	Crassaminicella sp. SY095§taxonomy:2599308	Firmicutes	Crassaminicella sp. SY095	SY095	0	0	126	3085	0.0408428	MarRef
GCF_001687625.2	/data2/marine_genomes_and_metagenomes/genomes_The_MAR_databases/prodigal_short/firmicutes/Planococcus_maritimus_DSM_17275_GCF_001687625.2.fas	§insdc.gca:GCA_001687625.2	§mmp.ref:MMP05366382	Bacilli	Planococcaceae	§gtdb:GCF_001687625.2	Planococcus	Bacteria|Firmicutes|Bacilli|Bacillales_A|Planococcaceae|Planococcus_B|Planococcus_B maritimus	Bacteria	Bacillales	Planococcus maritimus§taxonomy:192421	Firmicutes	Unclassified	TF-9|DSM 17275|CIP 11543|JCM 11543|KCCM 41587	0	0	80	3232	0.0247525	MarRef
GCF_002237735.1	/data2/marine_genomes_and_metagenomes/genomes_The_MAR_databases/prodigal_short/firmicutes/Priestia_filamentosa_DSM_27955_GCF_002237735.1.fas	§insdc.gca:GCA_002237735.1	§mmp.db:MMP06319185	Bacilli	Bacillaceae	§gtdb:GCF_900177535.1	Bacillus	Bacteria|Firmicutes|Bacilli|Bacillales|Bacillaceae_H|Bacillus_I|Bacillus_I filamentosus	Bacteria	Bacillales	Priestia filamentosa§taxonomy:1402861	Firmicutes	Unclassified	SGD-14|DSM 27955|NCIM 5491	0	0	147	5164	0.0284663	MarDB
GCF_000269945.1	/data2/marine_genomes_and_metagenomes/genomes_The_MAR_databases/prodigal_short/firmicutes/Lactococcus_garvieae_Lg2_GCF_000269945.1.fas	§insdc.gca:GCA_000269945.1	§mmp.ref:MMP00060912	Bacilli	Streptococcaceae	§gtdb:GCF_000269925.1	Lactococcus	Bacteria|Firmicutes|Bacilli|Lactobacillales|Streptococcaceae|Lactococcus|Lactococcus garvieae	Bacteria	Lactobacillales	Lactococcus garvieae Lg2§taxonomy:420890	Firmicutes	Lactococcus garvieae	Lg2	0	0	329	1954	0.168373	MarRef
GCF_001630115.1	/data2/marine_genomes_and_metagenomes/genomes_The_MAR_databases/prodigal_short/firmicutes/Bacillus_badius_SGD-V-25_GCF_001630115.1.fas	§insdc.gca:GCA_001630115.1	§mmp.db:MMP04494515	Bacilli	Bacillaceae	§gtdb:GCF_001591605.1	Bacillus	Bacteria|Firmicutes|Bacilli|Bacillales|Domibacillaceae|Bacillus_N|Bacillus_N badius	Bacteria	Bacillales	1414647	Firmicutes	Unclassified	SGD-V-25	0	0	106	3936	0.0269309	MarDB
GCF_002355575.1	/data2/marine_genomes_and_metagenomes/genomes_The_MAR_databases/prodigal_short/firmicutes/Lactococcus_garvieae_122061_GCF_002355575.1.fas	§insdc.gca:GCA_002355575.1	§mmp.ref:MMP00046983	Bacilli	Streptococcaceae	§gtdb:GCF_002355575.1	Lactococcus	Bacteria|Firmicutes|Bacilli|Lactobacillales|Streptococcaceae|Lactococcus|Lactococcus garvieae_B	Bacteria	Lactobacillales	Lactococcus garvieae§taxonomy:1363	Firmicutes	Unclassified	Uncultured bacterium ECS31§taxonomy:122061	0	0	369	1989	0.18552	MarRef
GCF_009739925.1	/data2/marine_genomes_and_metagenomes/genomes_The_MAR_databases/prodigal_short/firmicutes/Bacillus_cereus_DLOU-Changhai_GCF_009739925.1.fas	§insdc.gca:GCA_009739925.1	§mmp.ref:MMP10819077	Bacilli	Bacillaceae	§gtdb:GCA_002243685.1	Bacillus	Bacteria|Firmicutes|Bacilli|Bacillales|Bacillaceae_G|Bacillus_A|Bacillus_A	Bacteria	Bacillales	Bacillus cereus§taxonomy:1396	Firmicutes	Bacillus cereus	DLOU-Changhai	0	0	189	5431	0.0348002	MarRef
GCF_000264395.1	/data2/marine_genomes_and_metagenomes/genomes_The_MAR_databases/prodigal_short/firmicutes/Bacillus_atrophaeus_C89_GCF_000264395.1.fas	§insdc.gca:GCA_000264395.1	§mmp.db:MMP02470933	Bacilli	Bacillaceae	§gtdb:GCF_001584335.1	Bacillus	Bacteria|Firmicutes|Bacilli|Bacillales|Bacillaceae|Bacillus|Bacillus atrophaeus	Bacteria	Bacillales	Bacillus atrophaeus C89§taxonomy:334727	Firmicutes	Bacillus atrophaeus	C89	0	0	221	4197	0.0526567	MarDB
GCF_003609645.1	/data2/marine_genomes_and_metagenomes/genomes_The_MAR_databases/prodigal_short/firmicutes/Thermohalobacter_berrensis_CTT3_GCF_003609645.1.fas	§insdc.gca:GCA_003609645.1	§mmp.db:MMP05504969	Clostridia	Clostridiaceae	0	Thermohalobacter	Bacteria|Firmicutes_A|Clostridia|Tissierellales|Caloranaerobacteraceae	Bacteria	Clostridiales	Thermohalobacter berrensis§taxonomy:99594	Firmicutes	Thermohalobacter berrensis	CTT3|CNCM 105955	0	0	122	2724	0.0447871	MarDB
GCF_000320345.1	/data2/marine_genomes_and_metagenomes/genomes_The_MAR_databases/prodigal_short/firmicutes/Weissella_ceti_NC36_GCF_000320345.1.fas	§insdc.gca:GCA_000320345.1	§mmp.db:MMP02472059	Bacilli	Leuconostocaceae	§gtdb:GCF_000750535.1	Weissella	Bacteria|Firmicutes|Bacilli|Lactobacillales|Lactobacillaceae|Weissella|Weissella ceti	Bacteria	Lactobacillales	Weissella ceti NC36§taxonomy:1238674	Firmicutes	Weissella ceti	NC36	0	0	31	1282	0.024181	MarDB
GCF_900111135.1	/data2/marine_genomes_and_metagenomes/genomes_The_MAR_databases/prodigal_short/firmicutes/Granulicatella_balaenopterae_DSM_15827_GCF_900111135.1.fas	§insdc.gca:GCA_900111135.1	§mmp.db:MMP05421767	Bacilli	Carnobacteriaceae	§gtdb:GCF_900111135.1	Granulicatella	Bacteria|Firmicutes|Bacilli|Lactobacillales|Aerococcaceae|Granulicatella|Granulicatella balaenopterae	Bacteria	Lactobacillales	Granulicatella balaenopterae§taxonomy:137733	Firmicutes	Unclassified	M1975/96/1|DSM 15827|ATCC 700813|CCUG 37380|CIP 105938	0	0	91	1938	0.0469556	MarDB
GCF_001308875.1	/data2/marine_genomes_and_metagenomes/genomes_The_MAR_databases/prodigal_short/firmicutes/Lysinibacillus_sp._ZYM-1_GCF_001308875.1.fas	§insdc.gca:GCA_001308875.1	§mmp.db:MMP04123205	Bacilli	Bacillaceae	§gtdb:GCF_001308875.1	Lysinibacillus	Bacteria|Firmicutes|Bacilli|Bacillales_A|Planococcaceae|Lysinibacillus|Lysinibacillus sp001308875	Bacteria	Bacillales	Lysinibacillus sp. ZYM-1§taxonomy:1681184	Firmicutes	Unclassified	ZYM-1	0	0	210	4860	0.0432099	MarDB
GCF_009649995.1	/data2/marine_genomes_and_metagenomes/genomes_The_MAR_databases/prodigal_short/firmicutes/Paenibacillus_sp._B01_GCF_009649995.1.fas	§insdc.gca:GCA_009649995.1	§mmp.ref:MMP13108120	Bacilli	Paenibacillaceae	§gtdb:GCF_000422485.1	Paenibacillus	Bacteria|Firmicutes_I|Bacilli_A|Paenibacillales|Paenibacillaceae|Paenibacillus_O|Paenibacillus_O	Bacteria	Bacillales	Paenibacillus sp. B01§taxonomy:2660554	Firmicutes	Paenibacillus sp. B01	B01	0	0	131	4890	0.0267894	MarRef
GCF_000477395.2	/data2/marine_genomes_and_metagenomes/genomes_The_MAR_databases/prodigal_short/firmicutes/Bacillus_licheniformis_CG-B52_GCF_000477395.2.fas	§insdc.gca:GCA_000477395.1	§mmp.db:MMP02316555	Bacilli	Bacillaceae	§gtdb:GCF_000011645.1	Bacillus	Bacteria|Firmicutes|Bacilli|Bacillales|Bacillaceae|Bacillus|Bacillus licheniformis	Bacteria	Bacillales	Bacillus licheniformis CG-B52§taxonomy:1368424	Firmicutes	Bacillus licheniformis	CG-B52	0	0	164	4657	0.0352158	MarDB
GCF_003054245.1	/data2/marine_genomes_and_metagenomes/genomes_The_MAR_databases/prodigal_short/firmicutes/Melghirimyces_profundicolus_DSM_45787_GCF_003054245.1.fas	§insdc.gca:GCA_003054245.1	§mmp.db:MMP08776942	Bacilli	Thermoactinomycetaceae	§gtdb:GCF_003054245.1	Melghirimyces	Bacteria|Firmicutes_I|Bacilli_A|Thermoactinomycetales|Thermoactinomycetaceae|Melghirimyces|Melghirimyces profundicolus	Bacteria	Bacillales	Melghirimyces profundicolus§taxonomy:1242148	Firmicutes	Melghirimyces profundicolus	DSM 45787	0	0	128	3740	0.0342246	MarDB
GCF_900538275.1	/data2/marine_genomes_and_metagenomes/genomes_The_MAR_databases/prodigal_short/firmicutes/Petrocella_atlantisensis_70B-A_GCF_900538275.1.fas	§insdc.gca:GCA_900538275.1	§mmp.ref:MMP4890528	Clostridia	Vallitaleaceae	0	Petrocella	Bacteria|Firmicutes_A|Clostridia|Lachnospirales|Vallitaleaceae|HGW-2	Bacteria	Clostridiales	Petrocella atlantisensis§taxonomy:2173034	Firmicutes	Petrocella atlantisensis	70B-A	0	0	150	3243	0.0462535	MarRef
GCF_000576325.1	/data2/marine_genomes_and_metagenomes/genomes_The_MAR_databases/prodigal_short/firmicutes/Bacillus_sp._JCM_19045_GCF_000576325.1.fas	§insdc.gca:GCA_000576325.1	§mmp.db:MMP00009117	Bacilli	Bacillaceae	§gtdb:GCF_000576325.1	Bacillus	Bacteria|Firmicutes|Bacilli|Bacillales|Bacillaceae_D|Bacillus_H|Bacillus_H sp000576325	Bacteria	Bacillales	Bacillus sp. JCM 19045§taxonomy:1460639	Firmicutes	Unclassified	JCM 19045	0	0	813	5558	0.146276	MarDB
GCF_003515775.1	/data2/marine_genomes_and_metagenomes/genomes_The_MAR_databases/prodigal_short/firmicutes/Lysinibacillus_yapensis_YLB-03_GCF_003515775.1.fas	§insdc.gca:GCA_003515775.1	§mmp.db:MMP09901142	Bacilli	Bacillaceae	0	Lysinibacillus	Bacteria|Firmicutes|Bacilli|Bacillales_A|Planococcaceae|Lysinibacillus_C	Bacteria	Bacillales	Lysinibacillus yapensis§taxonomy:2304605	Firmicutes	Lysinibacillus sp. YLB-03	YLB-03	0	0	94	3672	0.0255991	MarDB
GCF_000190475.1	/data2/marine_genomes_and_metagenomes/genomes_The_MAR_databases/prodigal_short/firmicutes/Ornithinibacillus_scapharcae_TW25_GCF_000190475.1.fas	§insdc.gca:GCA_000190475.2	§mmp.db:MMP02470211	Bacilli	Bacillaceae	§gtdb:GCF_000190475.1	Ornithinibacillus	Bacteria|Firmicutes|Bacilli|Bacillales|Amphibacillaceae|Ornithinibacillus_A|Ornithinibacillus_A scapharcae	Bacteria	Bacillales	Ornithinibacillus scapharcae TW25§taxonomy:981383	Firmicutes	Ornithinibacillus scapharcae	TW25	0	0	238	4010	0.0593516	MarDB
GCF_003615245.1	/data2/marine_genomes_and_metagenomes/genomes_The_MAR_databases/prodigal_short/firmicutes/Salipaludibacillus_neizhouensis_KCTC_13187_GCF_003615245.1.fas	§insdc.gca:GCA_003615245.1	§mmp.db:MMP07788960	Bacilli	Bacillaceae	§gtdb:GCF_002886185.1	Salipaludibacillus	Bacteria|Firmicutes|Bacilli|Bacillales|Salisediminibacteriaceae|Salipaludibacillus|Salipaludibacillus neizhouensis	Bacteria	Bacillales	Salipaludibacillus neizhouensis§taxonomy:885475	Firmicutes	Salipaludibacillus neizhouensis	KCTC 13187|CCTCC AB 207161|JSM 071004	0	0	234	5113	0.0457657	MarDB
GCF_003362805.1	/data2/marine_genomes_and_metagenomes/genomes_The_MAR_databases/prodigal_short/firmicutes/Bacillus_piezotolerans_YLB-04_GCF_003362805.1.fas	§insdc.gca:GCA_003362805.1	§mmp.db:MMP09531617	Bacilli	Bacillaceae	0	Bacillus	Bacteria|Firmicutes|Bacilli|Bacillales|Bacillaceae_A|Bacillus_D	Bacteria	Bacillales	Bacillus piezotolerans§taxonomy:2259171	Firmicutes	Bacillus sp. YLB-04	YLB-04	0	0	119	4484	0.0265388	MarDB
GCF_900103005.1	/data2/marine_genomes_and_metagenomes/genomes_The_MAR_databases/prodigal_short/firmicutes/Acidaminobacter_hydrogenoformans_DSM_2784_GCF_900103005.1.fas	§insdc.gca:GCA_900103005.1	§mmp.db:MMP03080599	Clostridia	Clostridiales Family XII. Incertae Sedis	§gtdb:GCF_900103005.1	Acidaminobacter	Bacteria|Firmicutes_A|Clostridia|Peptostreptococcales|Acidaminobacteraceae|Acidaminobacter|Acidaminobacter hydrogenoformans	Bacteria	Clostridiales	Acidaminobacter hydrogenoformans DSM 2784§taxonomy:1120920	Firmicutes	Acidaminobacter hydrogenoformans	Glu 65|DSM 2784	0	0	118	3314	0.0356065	MarDB
GCF_001866725.1	/data2/marine_genomes_and_metagenomes/genomes_The_MAR_databases/prodigal_short/firmicutes/Bacillus_sp._MUM_13_GCF_001866725.1.fas	§insdc.gca:GCA_001866725.1	§mmp.db:MMP05915829	Bacilli	Bacillaceae	§gtdb:GCF_900112495.1	Bacillus	Bacteria|Firmicutes|Bacilli|Bacillales|Bacillaceae_A|MUM-13|MUM-13 sp900112495	Bacteria	Bacillales	Bacillus sp. MUM 13§taxonomy:1678001	Firmicutes	Unclassified	MUM 13	0	0	181	4530	0.0399558	MarDB
GCF_001884125.1	/data2/marine_genomes_and_metagenomes/genomes_The_MAR_databases/prodigal_short/firmicutes/Bacillus_sp._4048_GCF_001884125.1.fas	§insdc.gca:GCA_001884125.1	§mmp.db:MMP05231545	Bacilli	Bacillaceae	§gtdb:GCF_001583695.1	Bacillus	Bacteria|Firmicutes|Bacilli|Bacillales|Bacillaceae_G|Bacillus_A|Bacillus_A wiedmannii	Bacteria	Bacillales	Bacillus sp. 4048§taxonomy:1866310	Firmicutes	Unclassified	Hydrocotyle§taxonomy:4048	0	0	249	5722	0.0435163	MarDB
GCF_002245355.1	/data2/marine_genomes_and_metagenomes/genomes_The_MAR_databases/prodigal_short/firmicutes/Paludifilum_halophilum_DSM_102817_GCF_002245355.1.fas	§insdc.gca:GCA_002245355.1	§mmp.db:MMP07411558	Bacilli	Thermoactinomycetaceae	§gtdb:GCF_002245355.1	Paludifilum	Bacteria|Firmicutes_I|Bacilli_A|Thermoactinomycetales|Thermoactinomycetaceae|Paludifilum|Paludifilum halophilum	Bacteria	Bacillales	Paludifilum halophilum§taxonomy:1642702	Firmicutes	Unclassified	SMBg3|DSM 102817|CCUG 68698	0	0	230	3786	0.0607501	MarDB
GCF_001482485.1	/data2/marine_genomes_and_metagenomes/genomes_The_MAR_databases/prodigal_short/firmicutes/Lysinibacillus_sp._F5_GCF_001482485.1.fas	§insdc.gca:GCA_001482485.1	§mmp.db:MMP03976055	Bacilli	Bacillaceae	§gtdb:GCF_002845985.1	Lysinibacillus	Bacteria|Firmicutes|Bacilli|Bacillales_A|Planococcaceae|Lysinibacillus|Lysinibacillus fusiformis_D	Bacteria	Bacillales	Lysinibacillus sp. F5§taxonomy:1700846	Firmicutes	Unclassified	F5	0	0	165	4447	0.0371037	MarDB
GCF_001307805.1	/data2/marine_genomes_and_metagenomes/genomes_The_MAR_databases/prodigal_short/firmicutes/Lentibacillus_amyloliquefaciens_LAM0015_GCF_001307805.1.fas	§insdc.gca:GCA_001307805.2	§mmp.db:MMP04103130	Bacilli	Bacillaceae	§gtdb:GCF_001307805.1	Lentibacillus	Bacteria|Firmicutes|Bacilli|Bacillales|Amphibacillaceae|Lentibacillus|Lentibacillus amyloliquefaciens	Bacteria	Bacillales	Lentibacillus amyloliquefaciens§taxonomy:1472767	Firmicutes	Unclassified	LAM0015	0	0	143	3934	0.0363498	MarDB
GCF_001884105.1	/data2/marine_genomes_and_metagenomes/genomes_The_MAR_databases/prodigal_short/firmicutes/Bacillus_luti_TD41_GCF_001884105.1.fas	§insdc.gca:GCA_001884105.1	§mmp.db:MMP05231662	Bacilli	Bacillaceae	§gtdb:GCF_001884105.1	Bacillus	Bacteria|Firmicutes|Bacilli|Bacillales|Bacillaceae_G|Bacillus_A|Bacillus_A sp001884105	Bacteria	Bacillales	380263	Firmicutes	Unclassified	TD41|MCCC 1A00359	0	0	186	5245	0.0354623	MarDB
GCF_000565285.1	/data2/marine_genomes_and_metagenomes/genomes_The_MAR_databases/prodigal_short/firmicutes/Cytobacillus_firmus_DS1_GCF_000565285.1.fas	§insdc.gca:GCA_000565285.1	§mmp.db:MMP02952946	Bacilli	Bacillaceae	§gtdb:GCF_000565285.1	Bacillus	Bacteria|Firmicutes|Bacilli|Bacillales|Bacillaceae_A|Bacillus_AA|Bacillus_AA firmus_A	Bacteria	Bacillales	Bacillus firmus DS1§taxonomy:1307436	Firmicutes	Bacillus firmus	DS1	0	0	165	5075	0.0325123	MarDB
GCF_003399705.1	/data2/marine_genomes_and_metagenomes/genomes_The_MAR_databases/prodigal_short/firmicutes/Virgibacillus_dokdonensis_AK90_GCF_003399705.1.fas	§insdc.gca:GCA_003399705.1	§mmp.db:MMP06885536	Bacilli	Bacillaceae	§gtdb:GCF_900129865.1	Virgibacillus	Bacteria|Firmicutes|Bacilli|Bacillales|Amphibacillaceae|Virgibacillus|Virgibacillus chiguensis	Bacteria	Bacillales	Virgibacillus dokdonensis§taxonomy:302167	Firmicutes	Virgibacillus dokdonensis	AK90	0	0	282	4272	0.0660112	MarDB
GCF_900114235.1	/data2/marine_genomes_and_metagenomes/genomes_The_MAR_databases/prodigal_short/firmicutes/Marinilactibacillus_piezotolerans_DSM_16108_GCF_900114235.1.fas	§insdc.gca:GCA_900114235.1	§mmp.db:MMP04488569	Bacilli	Carnobacteriaceae	§gtdb:GCF_900114235.1	Marinilactibacillus	Bacteria|Firmicutes|Bacilli|Lactobacillales|Carnobacteriaceae|Marinilactibacillus|Marinilactibacillus piezotolerans	Bacteria	Lactobacillales	Marinilactibacillus piezotolerans§taxonomy:258723	Firmicutes	Unclassified	LT20|DSM 16108	0	0	145	2480	0.0584677	MarDB
GCF_002189605.1	/data2/marine_genomes_and_metagenomes/genomes_The_MAR_databases/prodigal_short/firmicutes/Bacillus_badius_DSM_28241_GCF_002189605.1.fas	§insdc.gca:GCA_002189605.1	§mmp.db:MMP06319182	Bacilli	Bacillaceae	§gtdb:GCF_001591605.1	Bacillus	Bacteria|Firmicutes|Bacilli|Bacillales|Domibacillaceae|Bacillus_N|Bacillus_N badius	Bacteria	Bacillales	1414647	Firmicutes	Unclassified	SGD-V-25|DSM 28241|NCIM 5513	0	0	107	3933	0.0272057	MarDB
GCF_900156125.1	/data2/marine_genomes_and_metagenomes/genomes_The_MAR_databases/prodigal_short/firmicutes/Domibacillus_enclensis_NIO-1016_GCF_900156125.1.fas	§insdc.gca:GCA_900156125.1	§mmp.db:MMP05443094	Bacilli	Bacillaceae	§gtdb:GCF_900156125.1	Domibacillus	Bacteria|Firmicutes|Bacilli|Bacillales|Domibacillaceae|Domibacillus|Domibacillus enclensis	Bacteria	Bacillales	Domibacillus enclensis§taxonomy:1017273	Firmicutes	Unclassified	NIO-1016	0	0	115	3782	0.0304072	MarDB
GCF_003710825.1	/data2/marine_genomes_and_metagenomes/genomes_The_MAR_databases/prodigal_short/firmicutes/Brevibacillus_fluminis_JCM_15716_GCF_003710825.1.fas	§insdc.gca:GCA_003710825.1	§mmp.db:MMP10330925	Bacilli	Paenibacillaceae	0	Brevibacillus	Bacteria|Firmicutes_I|Bacilli_A|Brevibacillales|Brevibacillaceae	Bacteria	Bacillales	Brevibacillus fluminis§taxonomy:511487	Firmicutes	Brevibacillus fluminis	CJ71|KACC 13381|JCM 15716	0	0	214	6162	0.034729	MarDB
GCF_002886185.1	/data2/marine_genomes_and_metagenomes/genomes_The_MAR_databases/prodigal_short/firmicutes/Salipaludibacillus_neizhouensis_DSM_19794_GCF_002886185.1.fas	§insdc.gca:GCA_002886185.1	§mmp.db:MMP07249151	Bacilli	Bacillaceae	§gtdb:GCF_002886185.1	Salipaludibacillus	Bacteria|Firmicutes|Bacilli|Bacillales|Salisediminibacteriaceae|Salipaludibacillus|Salipaludibacillus neizhouensis	Bacteria	Bacillales	Salipaludibacillus neizhouensis§taxonomy:885475	Firmicutes	Salipaludibacillus neizhouensis	DSM 19794	0	0	196	5118	0.0382962	MarDB
GCF_008432245.1	/data2/marine_genomes_and_metagenomes/genomes_The_MAR_databases/prodigal_short/firmicutes/Bacillus_sp._BS98_GCF_008432245.1.fas	§insdc.gca:GCA_008432245.1	§mmp.ref:MMP12697402	Bacilli	Bacillaceae	§gtdb:GCF_000496285.1	Bacillus	Bacteria|Firmicutes|Bacilli|Bacillales|Bacillaceae_G|Bacillus_A|Bacillus_A	Bacteria	Bacillales	Bacillus sp. BS98§taxonomy:2608254	Firmicutes	Bacillus sp. BS98	BS98	0	0	208	5844	0.0355921	MarRef
GCF_003318295.1	/data2/marine_genomes_and_metagenomes/genomes_The_MAR_databases/prodigal_short/firmicutes/Bacillus_taeanensis_BH030017_GCF_003318295.1.fas	§insdc.gca:GCA_003318295.1	§mmp.db:MMP09625553	Bacilli	Bacillaceae	0	Bacillus	Bacteria|Firmicutes|Bacilli|Bacillales|UBA6769	Bacteria	Bacillales	Bacillus taeanensis§taxonomy:273032	Firmicutes	Bacillus taeanensis	BH030017|KCTC 3918|DSM 16466	0	0	204	4610	0.0442516	MarDB
GCF_001457035.1	/data2/marine_genomes_and_metagenomes/genomes_The_MAR_databases/prodigal_short/firmicutes/Fictibacillus_enclensis_NIO-1003_GCF_001457035.1.fas	§insdc.gca:GCA_001457035.1	§mmp.db:MMP04263890	Bacilli	Bacillaceae	§gtdb:GCF_001457035.1	Fictibacillus	Bacteria|Firmicutes|Bacilli|Bacillales|Fictibacillaceae|Fictibacillus_C|Fictibacillus_C enclensis	Bacteria	Bacillales	Fictibacillus enclensis§taxonomy:1017270	Firmicutes	Unclassified	NIO-1003	0	0	108	4606	0.0234477	MarDB
GCF_000576365.1	/data2/marine_genomes_and_metagenomes/genomes_The_MAR_databases/prodigal_short/firmicutes/Bacillus_sp._JCM_19047_GCF_000576365.1.fas	§insdc.gca:GCA_000576365.1	§mmp.db:MMP00006053	Bacilli	Bacillaceae	§gtdb:GCF_000576365.1	Bacillus	Bacteria|Firmicutes|Bacilli|Bacillales|Bacillaceae_D|Bacillus_H|Bacillus_H sp000576365	Bacteria	Bacillales	Bacillus sp. JCM 19047§taxonomy:1460641	Firmicutes	Unclassified	JCM 19047	0	0	936	5371	0.174269	MarDB
GCF_001573635.1	/data2/marine_genomes_and_metagenomes/genomes_The_MAR_databases/prodigal_short/firmicutes/Clostridium_botulinum_Prevot_Ped_1_GCF_001573635.1.fas	§insdc.gca:GCA_001573635.1	§mmp.db:MMP03779995	Clostridia	Clostridiaceae	§gtdb:GCF_000827935.1	Clostridium	Bacteria|Firmicutes_A|Clostridia|Clostridiales|Clostridiaceae|Clostridium|Clostridium botulinum_A	Bacteria	Clostridiales	Clostridium botulinum§taxonomy:1491	Firmicutes	Unclassified	Prevot Ped 1	0	0	159	3487	0.0455979	MarDB
GCF_900162315.1	/data2/marine_genomes_and_metagenomes/genomes_The_MAR_databases/prodigal_short/firmicutes/Listeria_monocytogenes_GCF_900162315.1.fas	§insdc.gca:GCA_900162315.1	§mmp.db:MMP72829168	Bacilli	Listeriaceae	§gtdb:GCF_900187225.1	Listeria	Bacteria|Firmicutes|Bacilli|Lactobacillales|Listeriaceae|Listeria|Listeria monocytogenes	Bacteria	Bacillales	Listeria monocytogenes§taxonomy:1639	Firmicutes	Unclassified	25H01	0	0	93	3028	0.0307133	MarDB
GCF_000348905.1	/data2/marine_genomes_and_metagenomes/genomes_The_MAR_databases/prodigal_short/firmicutes/Bhargavaea_cecembensis_DSE10_GCF_000348905.1.fas	§insdc.gca:GCA_000348905.1	§mmp.db:MMP02469443	Bacilli	Planococcaceae	§gtdb:GCF_000348905.1	Bhargavaea	Bacteria|Firmicutes|Bacilli|Bacillales_A|Planococcaceae|Bhargavaea|Bhargavaea cecembensis	Bacteria	Bacillales	Bhargavaea cecembensis DSE10§taxonomy:1235279	Firmicutes	Bhargavaea cecembensis	DSE10	0	0	81	3195	0.0253521	MarDB
GCF_001482495.1	/data2/marine_genomes_and_metagenomes/genomes_The_MAR_databases/prodigal_short/firmicutes/Bacillus_sp._G3(2015)_GCF_001482495.1.fas	§insdc.gca:GCA_001482495.1	§mmp.db:MMP03976073	Bacilli	Bacillaceae	§gtdb:GCF_002148155.1	Bacillus	Bacteria|Firmicutes|Bacilli|Bacillales|Bacillaceae_G|Bacillus_A|Bacillus_A thuringiensis_J	Bacteria	Bacillales	Bacillus sp. G3(2015)§taxonomy:1706731	Firmicutes	Unclassified	G3(2015)	0	0	204	5522	0.0369431	MarDB
GCF_000971535.1	/data2/marine_genomes_and_metagenomes/genomes_The_MAR_databases/prodigal_short/firmicutes/Bacillus_sp._UMTAT18_GCF_000971535.1.fas	§insdc.gca:GCA_000971535.1	§mmp.db:MMP03145045	Bacilli	Bacillaceae	§gtdb:GCF_002214725.1	Bacillus	Bacteria|Firmicutes|Bacilli|Bacillales|Bacillaceae_G|Bacillus_A|Bacillus_A cereus_AD	Bacteria	Bacillales	Bacillus sp. UMTAT18§taxonomy:1565146	Firmicutes	Unclassified	UMTAT18	0	0	181	5607	0.0322811	MarDB
GCF_003369565.1	/data2/marine_genomes_and_metagenomes/genomes_The_MAR_databases/prodigal_short/firmicutes/Oceanobacillus_chungangensis_CAU_1051_GCF_003369565.1.fas	§insdc.gca:GCA_003369565.1	§mmp.db:MMP08100097	Bacilli	Bacillaceae	0	Oceanobacillus	Bacteria|Firmicutes|Bacilli|Bacillales|Amphibacillaceae|Oceanobacillus	Bacteria	Bacillales	Oceanobacillus chungangensis§taxonomy:1229152	Firmicutes	Oceanobacillus chungangensis	CAU 1051	0	0	138	3913	0.0352671	MarDB
GCF_001541995.1	/data2/marine_genomes_and_metagenomes/genomes_The_MAR_databases/prodigal_short/firmicutes/Bacillus_cereus_PE8-121b_GCF_001541995.1.fas	§insdc.gca:GCA_001541995.1	§mmp.db:MMP04432438	Bacilli	Bacillaceae	§gtdb:GCF_000181835.1	Bacillus	Bacteria|Firmicutes|Bacilli|Bacillales|Bacillaceae_G|Bacillus_A|Bacillus_A anthracis	Bacteria	Bacillales	Bacillus cereus§taxonomy:1396	Firmicutes	Unclassified	PE8121b	0	0	271	5952	0.0455309	MarDB
GCF_001027905.1	/data2/marine_genomes_and_metagenomes/genomes_The_MAR_databases/prodigal_short/firmicutes/Exiguobacterium_sp._JLM-2_GCF_001027905.1.fas	§insdc.gca:GCA_001027905.1	§mmp.db:MMP03568901	Bacilli	Unclassified	§gtdb:GCF_001909285.1	Unclassified	Bacteria|Firmicutes|Bacilli|Exiguobacterales|Exiguobacteraceae|Exiguobacterium|Exiguobacterium profundum	Bacteria	Bacillales	Exiguobacterium sp. JLM-2§taxonomy:1647415	Firmicutes	Unclassified	JLM-2	0	0	82	2988	0.0274431	MarDB
GCF_000759675.1	/data2/marine_genomes_and_metagenomes/genomes_The_MAR_databases/prodigal_short/firmicutes/Neobacillus_niacini_F8_GCF_000759675.1.fas	§insdc.gca:GCA_000759675.1	§mmp.db:MMP00000021	Bacilli	Bacillaceae	§gtdb:GCF_000759675.1	Bacillus	Bacteria|Firmicutes|Bacilli|Bacillales|Bacillaceae_A|Bacillus_W|Bacillus_W niacini_B	Bacteria	Bacillales	Neobacillus niacini§taxonomy:86668	Firmicutes	Unclassified	F8	0	0	277	6138	0.0451287	MarDB
GCF_000715205.1	/data2/marine_genomes_and_metagenomes/genomes_The_MAR_databases/prodigal_short/firmicutes/Bacillus_zhangzhouensis_DW5-4_GCF_000715205.1.fas	§insdc.gca:GCA_000715205.1	§mmp.db:MMP02870955	Bacilli	Bacillaceae	§gtdb:GCF_000715205.1	Bacillus	Bacteria|Firmicutes|Bacilli|Bacillales|Bacillaceae|Bacillus|Bacillus zhangzhouensis	Bacteria	Bacillales	Bacillus zhangzhouensis§taxonomy:1178540	Firmicutes	Unclassified	DW5-4	0	0	144	3885	0.0370656	MarDB
GCF_001457055.1	/data2/marine_genomes_and_metagenomes/genomes_The_MAR_databases/prodigal_short/firmicutes/Bacillus_sp._SGD-V-76_GCF_001457055.1.fas	§insdc.gca:GCA_001457055.1	§mmp.db:MMP04263914	Bacilli	Bacillaceae	§gtdb:GCF_001591565.1	Bacillus	Bacteria|Firmicutes|Bacilli|Bacillales|Bacillaceae_H|Bacillus_C|Bacillus_C flexus	Bacteria	Bacillales	Bacillus sp. SGD-V-76§taxonomy:1414648	Firmicutes	Unclassified	SGD-V-76	0	0	252	4456	0.056553	MarDB
GCF_001750285.1	/data2/marine_genomes_and_metagenomes/genomes_The_MAR_databases/prodigal_short/firmicutes/Domibacillus_iocasae_DSM_29979_GCF_001750285.1.fas	§insdc.gca:GCA_001750285.1	§mmp.db:MMP05255235	Bacilli	Bacillaceae	§gtdb:GCF_001750285.1	Domibacillus	Bacteria|Firmicutes|Bacilli|Bacillales|Domibacillaceae|Domibacillus|Domibacillus iocasae	Bacteria	Bacillales	Domibacillus iocasae§taxonomy:1714016	Firmicutes	Unclassified	DSM 29979	0	0	124	3541	0.0350184	MarDB
GCF_000970685.1	/data2/marine_genomes_and_metagenomes/genomes_The_MAR_databases/prodigal_short/firmicutes/Domibacillus_indicus_SD_111_GCF_000970685.1.fas	§insdc.gca:GCA_000970685.1	§mmp.db:MMP03406600	Bacilli	Bacillaceae	§gtdb:GCF_000970685.1	Domibacillus	Bacteria|Firmicutes|Bacilli|Bacillales|Domibacillaceae|Domibacillus|Domibacillus indicus	Bacteria	Bacillales	Domibacillus indicus§taxonomy:1437523	Firmicutes	Unclassified	SD 111	0	0	124	3553	0.0349001	MarDB
GCF_008973485.1	/data2/marine_genomes_and_metagenomes/genomes_The_MAR_databases/prodigal_short/firmicutes/Psychrobacillus_glaciei_PB01_GCF_008973485.1.fas	§insdc.gca:GCA_008973485.1	§mmp.ref:MMP09708448	Bacilli	Bacillaceae	0	Psychrobacillus	Bacteria|Firmicutes|Bacilli|Bacillales_A|Planococcaceae	Bacteria	Bacillales	Psychrobacillus glaciei§taxonomy:2283160	Firmicutes	Psychrobacillus glaciei	PB01	0	0	213	4166	0.0511282	MarRef
GCF_003345275.1	/data2/marine_genomes_and_metagenomes/genomes_The_MAR_databases/prodigal_short/firmicutes/Enterococcus_faecalis_TY1_flatfish_GCF_003345275.1.fas	§insdc.gca:GCA_003345275.1	§mmp.ref:MMP09640605	Bacilli	Enterococcaceae	§gtdb:GCF_000392875.1	Enterococcus	Bacteria|Firmicutes|Bacilli|Lactobacillales|Enterococcaceae|Enterococcus|Enterococcus faecalis	Bacteria	Lactobacillales	Enterococcus faecalis§taxonomy:1351	Firmicutes	Enterococcus faecalis	TY1	0	0	100	3130	0.0319489	MarRef
GCF_003182355.1	/data2/marine_genomes_and_metagenomes/genomes_The_MAR_databases/prodigal_short/firmicutes/Cytobacillus_oceanisediminis_15_TX_GCF_003182355.1.fas	§insdc.gca:GCA_003182355.1	§mmp.db:MMP09074692	Bacilli	Bacillaceae	§gtdb:GCF_003182355.1	Bacillus	Bacteria|Firmicutes|Bacilli|Bacillales|Bacillaceae_A|Bacillus_AA|Bacillus_AA oceanisediminis_A	Bacteria	Bacillales	Cytobacillus oceanisediminis§taxonomy:665099	Firmicutes	Bacillus oceanisediminis	15_T	0	0	194	5566	0.0348545	MarDB
GCF_900109825.1	/data2/marine_genomes_and_metagenomes/genomes_The_MAR_databases/prodigal_short/firmicutes/Alkalibacterium_putridalgicola_DSM_19182_GCF_900109825.1.fas	§insdc.gca:GCA_900109825.1	§mmp.db:MMP04488100	Bacilli	Carnobacteriaceae	§gtdb:GCF_900109825.1	Alkalibacterium	Bacteria|Firmicutes|Bacilli|Lactobacillales|Carnobacteriaceae|Alkalibacterium|Alkalibacterium putridalgicola	Bacteria	Lactobacillales	Alkalibacterium putridalgicola§taxonomy:426703	Firmicutes	Unclassified	T129-2-1|DSM 19182|NBRC 103243|NRIC 0720	0	0	75	2458	0.0305126	MarDB
GCF_001877785.1	/data2/marine_genomes_and_metagenomes/genomes_The_MAR_databases/prodigal_short/firmicutes/Rossellomorea_aquimaris_SAMM_GCF_001877785.1.fas	§insdc.gca:GCA_001877785.1	§mmp.db:MMP05728461	Bacilli	Bacillaceae	§gtdb:GCF_001877785.1	Bacillus	Bacteria|Firmicutes|Bacilli|Bacillales|Bacillaceae_B|Bacillus_F|Bacillus_F aquimaris_A	Bacteria	Bacillales	Bacillus aquimaris§taxonomy:189382	Firmicutes	Unclassified	SAMM	0	0	152	4479	0.0339361	MarDB
GCF_001889165.1	/data2/marine_genomes_and_metagenomes/genomes_The_MAR_databases/prodigal_short/firmicutes/Bacillus_weihaiensis_Alg07_GCF_001889165.1.fas	§insdc.gca:GCA_001889165.1	§mmp.ref:MMP05178567	Bacilli	Bacillaceae	§gtdb:GCF_001889165.1	Bacillus	Bacteria|Firmicutes|Bacilli|Bacillales|Bacillaceae|Bacillus_AY|Bacillus_AY weihaiensis	Bacteria	Bacillales	Bacillus weihaiensis§taxonomy:1547283	Firmicutes	Unclassified	Alg07	0	0	151	4189	0.0360468	MarRef
GCF_001038485.1	/data2/marine_genomes_and_metagenomes/genomes_The_MAR_databases/prodigal_short/firmicutes/Ornithinibacillus_californiensis_DSM_16628_GCF_001038485.1.fas	§insdc.gca:GCA_001038485.1	§mmp.db:MMP03290694	Bacilli	Bacillaceae	§gtdb:GCF_001038485.1	Ornithinibacillus	Bacteria|Firmicutes|Bacilli|Bacillales|Amphibacillaceae|Ornithinibacillus|Ornithinibacillus californiensis	Bacteria	Bacillales	Ornithinibacillus californiensis§taxonomy:161536	Firmicutes	Unclassified	MB-9	0	0	135	4090	0.0330073	MarDB
GCF_000294755.1	/data2/marine_genomes_and_metagenomes/genomes_The_MAR_databases/prodigal_short/firmicutes/Virgibacillus_halodenitrificans_1806_GCF_000294755.1.fas	§insdc.gca:GCA_000294755.1	§mmp.db:MMP02470180	Bacilli	Bacillaceae	§gtdb:GCF_001310895.1	Virgibacillus	Bacteria|Firmicutes|Bacilli|Bacillales|Amphibacillaceae|Virgibacillus|Virgibacillus halodenitrificans	Bacteria	Bacillales	Virgibacillus halodenitrificans 1806§taxonomy:1196028	Firmicutes	Virgibacillus halodenitrificans	Mycobacterium tuberculosis variant microti§taxonomy:1806	0	0	103	3900	0.0264103	MarDB
GCF_001559865.1	/data2/marine_genomes_and_metagenomes/genomes_The_MAR_databases/prodigal_short/firmicutes/Abyssisolibacter_fermentans_MCWD3_GCF_001559865.1.fas	§insdc.gca:GCA_001559865.1	§mmp.db:MMP04316851	Clostridia	Unclassified	§gtdb:GCF_001559865.1	Unclassified	Bacteria|Firmicutes_A|Clostridia|Tissierellales|MCWD3|MCWD3|MCWD3 sp001559865	Bacteria	Clostridiales	Abyssisolibacter fermentans§taxonomy:1766203	Firmicutes	Unclassified	MCWD3	0	0	220	4243	0.0518501	MarDB
GCF_000444805.1	/data2/marine_genomes_and_metagenomes/genomes_The_MAR_databases/prodigal_short/firmicutes/Bacillus_safensis_CCMA-560_GCF_000444805.1.fas	§insdc.gca:GCA_000444805.1	§mmp.db:MMP02471694	Bacilli	Bacillaceae	§gtdb:GCF_000691165.1	Bacillus	Bacteria|Firmicutes|Bacilli|Bacillales|Bacillaceae|Bacillus|Bacillus safensis	Bacteria	Bacillales	Bacillus pumilus CCMA-560§taxonomy:1350468	Firmicutes	Bacillus pumilus	CCMA-560	0	0	118	4005	0.0294632	MarDB
GCF_001400065.1	/data2/marine_genomes_and_metagenomes/genomes_The_MAR_databases/prodigal_short/firmicutes/Enterococcus_faecalis_P9-1_GCF_001400065.1.fas	§insdc.gca:GCA_001400065.1	§mmp.db:MMP04100217	Bacilli	Enterococcaceae	§gtdb:GCF_000392875.1	Enterococcus	Bacteria|Firmicutes|Bacilli|Lactobacillales|Enterococcaceae|Enterococcus|Enterococcus faecalis	Bacteria	Lactobacillales	Enterococcus faecalis§taxonomy:1351	Firmicutes	Unclassified	P9-1	0	0	920	3719	0.247378	MarDB
GCF_001456895.1	/data2/marine_genomes_and_metagenomes/genomes_The_MAR_databases/prodigal_short/firmicutes/Exiguobacterium_enclense_NIO-1109_GCF_001456895.1.fas	§insdc.gca:GCA_001456895.1	§mmp.db:MMP04263895	Bacilli	Unclassified	§gtdb:GCF_001939065.1	Unclassified	Bacteria|Firmicutes|Bacilli|Exiguobacterales|Exiguobacteraceae|Exiguobacterium_A|Exiguobacterium_A indicum	Bacteria	Bacillales	Exiguobacterium enclense§taxonomy:1017277	Firmicutes	Unclassified	NIO-1109	0	0	112	3349	0.0334428	MarDB
GCF_900100775.1	/data2/marine_genomes_and_metagenomes/genomes_The_MAR_databases/prodigal_short/firmicutes/Facklamia_miroungae_ATCC_BAA-466_GCF_900100775.1.fas	§insdc.gca:GCA_900100775.1	§mmp.db:MMP05421791	Bacilli	Aerococcaceae	§gtdb:GCF_900100775.1	Facklamia	Bacteria|Firmicutes|Bacilli|Lactobacillales|Aerococcaceae|Facklamia|Facklamia miroungae	Bacteria	Lactobacillales	Facklamia miroungae§taxonomy:120956	Firmicutes	Unclassified	ATCC BAA-466	0	0	99	1898	0.0521602	MarDB
GCF_001888495.1	/data2/marine_genomes_and_metagenomes/genomes_The_MAR_databases/prodigal_short/firmicutes/Lactiplantibacillus_plantarum_MHO2.5_GCF_001888495.1.fas	§insdc.gca:GCA_001888495.1	§mmp.db:MMP03654490	Bacilli	Lactobacillaceae	§gtdb:GCA_000615325.1	Lactobacillus	Bacteria|Firmicutes|Bacilli|Lactobacillales|Lactobacillaceae|Lactobacillus_F|Lactobacillus_F plantarum	Bacteria	Lactobacillales	Lactiplantibacillus plantarum§taxonomy:1590	Firmicutes	Unclassified	MHO2.5	0	0	186	3192	0.0582707	MarDB
GCF_002233655.1	/data2/marine_genomes_and_metagenomes/genomes_The_MAR_databases/prodigal_short/firmicutes/Enterococcus_faecium_ICBEf1B_GCF_002233655.1.fas	§insdc.gca:GCA_002233655.1	§mmp.db:MMP07326818	Bacilli	Enterococcaceae	§gtdb:GCF_001544255.1	Enterococcus	Bacteria|Firmicutes|Bacilli|Lactobacillales|Enterococcaceae|Enterococcus_B|Enterococcus_B faecium	Bacteria	Lactobacillales	Enterococcus faecium§taxonomy:1352	Firmicutes	Unclassified	ICBEf1B	0	0	179	3030	0.0590759	MarDB
GCF_001883875.1	/data2/marine_genomes_and_metagenomes/genomes_The_MAR_databases/prodigal_short/firmicutes/Bacillus_thuringiensis_B-2012_GCF_001883875.1.fas	§insdc.gca:GCA_001883875.1	§mmp.db:MMP05231664	Bacilli	Bacillaceae	§gtdb:GCA_002243685.1	Bacillus	Bacteria|Firmicutes|Bacilli|Bacillales|Bacillaceae_G|Bacillus_A|Bacillus_A thuringiensis	Bacteria	Bacillales	Bacillus thuringiensis§taxonomy:1428	Firmicutes	Unclassified	B-2012|MCCC 1A00841	0	0	259	5890	0.0439728	MarDB
GCF_004328725.1	/data2/marine_genomes_and_metagenomes/genomes_The_MAR_databases/prodigal_short/firmicutes/Lactococcus_garvieae_JJJN1_GCF_004328725.1.fas	§insdc.gca:GCA_004328725.1	§mmp.ref:MMP08435054	Bacilli	Streptococcaceae	§gtdb:GCF_000269925.1	Lactococcus	Bacteria|Firmicutes|Bacilli|Lactobacillales|Streptococcaceae|Lactococcus|Lactococcus	Bacteria	Lactobacillales	Lactococcus garvieae§taxonomy:1363	Firmicutes	Lactococcus garvieae	JJJN1	0	0	343	1974	0.173759	MarRef
GCF_003313305.1	/data2/marine_genomes_and_metagenomes/genomes_The_MAR_databases/prodigal_short/firmicutes/Vallitalea_guaymasensis_L81_GCF_003313305.1.fas	§insdc.gca:GCA_003313305.1	§mmp.db:MMP08944605	Clostridia	Defluviitaleaceae	§gtdb:GCA_003313305.1	Vallitalea	Bacteria|Firmicutes_A|Clostridia|Lachnospirales|Vallitaleaceae|Vallitalea|Vallitalea guaymasensis	Bacteria	Clostridiales	Vallitalea guaymasensis§taxonomy:1185412	Firmicutes	Vallitalea guaymasensis	L81	0	0	291	5670	0.0513228	MarDB
GCF_008807835.1	/data2/marine_genomes_and_metagenomes/genomes_The_MAR_databases/prodigal_short/firmicutes/Paraclostridium_bifermentans_Cbm_GCF_008807835.1.fas	§insdc.gca:GCA_008807835.1	§mmp.ref:MMP10058707	Clostridia	Peptostreptococcaceae	§gtdb:GCF_001282705.1	Paraclostridium	Bacteria|Firmicutes_A|Clostridia|Peptostreptococcales|Peptostreptococcaceae|Paraclostridium|Paraclostridium	Bacteria	Clostridiales	Paraclostridium bifermentans§taxonomy:1490	Firmicutes	Paraclostridium bifermentans	Cbm	0	0	140	3639	0.0384721	MarRef
GCF_003987565.1	/data2/marine_genomes_and_metagenomes/genomes_The_MAR_databases/prodigal_short/firmicutes/Vagococcus_fessus_CCUG_41755_GCF_003987565.1.fas	§insdc.gca:GCA_003987565.1	§mmp.db:MMP06609014	Bacilli	Enterococcaceae	0	Vagococcus	Bacteria|Firmicutes|Bacilli|Lactobacillales|Vagococcaceae	Bacteria	Lactobacillales	Vagococcus fessus§taxonomy:120370	Firmicutes	Vagococcus fessus	CCUG 41755	0	0	43	2149	0.0200093	MarDB
GCF_000425825.1	/data2/marine_genomes_and_metagenomes/genomes_The_MAR_databases/prodigal_short/firmicutes/Jeotgalicoccus_marinus_DSM_19772_GCF_000425825.1.fas	§insdc.gca:GCA_000425825.1	§mmp.db:MMP02441531	Bacilli	Staphylococcaceae	§gtdb:GCF_000425825.1	Jeotgalicoccus	Bacteria|Firmicutes|Bacilli|Staphylococcales|Salinicoccaceae|Jeotgalicoccus|Jeotgalicoccus marinus	Bacteria	Bacillales	Jeotgalicoccus marinus DSM 19772§taxonomy:1122128	Firmicutes	Jeotgalicoccus marinus	JSM 076033	0	0	110	2221	0.0495272	MarDB
GCF_001883995.1	/data2/marine_genomes_and_metagenomes/genomes_The_MAR_databases/prodigal_short/firmicutes/Bacillus_paranthracis_Mn5_GCF_001883995.1.fas	§insdc.gca:GCA_001883995.1	§mmp.db:MMP05231549	Bacilli	Bacillaceae	§gtdb:GCF_002214725.1	Bacillus	Bacteria|Firmicutes|Bacilli|Bacillales|Bacillaceae_G|Bacillus_A|Bacillus_A cereus_AD	Bacteria	Bacillales	368294	Firmicutes	Unclassified	Mn5|MCCC 1A00395	0	0	207	5675	0.0364758	MarDB
GCF_003410255.1	/data2/marine_genomes_and_metagenomes/genomes_The_MAR_databases/prodigal_short/firmicutes/Bacillus_anthracis_MCCC_1A02161_GCF_003410255.1.fas	§insdc.gca:GCA_003410255.1	§mmp.ref:MMP09789251	Bacilli	Bacillaceae	§gtdb:GCF_000181835.1	Bacillus	Bacteria|Firmicutes|Bacilli|Bacillales|Bacillaceae_G|Bacillus_A|Bacillus_A anthracis	Bacteria	Bacillales	Bacillus anthracis§taxonomy:1392	Firmicutes	Bacillus anthracis	MCCC 1A02161	0	0	177	5366	0.0329855	MarRef
GCF_002290105.1	/data2/marine_genomes_and_metagenomes/genomes_The_MAR_databases/prodigal_short/firmicutes/Bacillus_cereus_CC-1_GCF_002290105.1.fas	§insdc.gca:GCA_002290105.1	§mmp.ref:MMP07593956	Bacilli	Bacillaceae	§gtdb:GCF_002214725.1	Bacillus	Bacteria|Firmicutes|Bacilli|Bacillales|Bacillaceae_G|Bacillus_A|Bacillus_A cereus_AD	Bacteria	Bacillales	Bacillus cereus§taxonomy:1396	Firmicutes	Unclassified	CC-1	0	0	139	5360	0.0259328	MarRef
GCF_001457015.1	/data2/marine_genomes_and_metagenomes/genomes_The_MAR_databases/prodigal_short/firmicutes/Bacillus_altitudinis_NIO-1130_GCF_001457015.1.fas	§insdc.gca:GCA_001457015.1	§mmp.db:MMP04263913	Bacilli	Bacillaceae	§gtdb:GCF_000691145.1	Bacillus	Bacteria|Firmicutes|Bacilli|Bacillales|Bacillaceae|Bacillus|Bacillus altitudinis	Bacteria	Bacillales	1049581	Firmicutes	Unclassified	NIO-1130	0	0	94	3691	0.0254674	MarDB
GCF_000702565.1	/data2/marine_genomes_and_metagenomes/genomes_The_MAR_databases/prodigal_short/firmicutes/Exiguobacterium_chiriqhucha_GIC31_GCF_000702565.1.fas	§insdc.gca:GCA_000702565.1	§mmp.db:MMP02841156	Bacilli	Unclassified	§gtdb:GCF_000416965.1	Unclassified	Bacteria|Firmicutes|Bacilli|Exiguobacterales|Exiguobacteraceae|Exiguobacterium|Exiguobacterium chiriqhucha	Bacteria	Bacillales	260398	Firmicutes	Unclassified	GIC31	0	0	71	3050	0.0232787	MarDB
GCF_900411365.1	/data2/marine_genomes_and_metagenomes/genomes_The_MAR_databases/prodigal_short/firmicutes/Bacillus_altitudinis_PAE4_GCF_900411365.1.fas	§insdc.gca:GCA_900411365.1	§mmp.db:MMP4665500	Bacilli	Bacillaceae	§gtdb:GCF_000691145.1	Bacillus	Bacteria|Firmicutes|Bacilli|Bacillales|Bacillaceae|Bacillus|Bacillus altitudinis	Bacteria	Bacillales	Bacillus pumilus§taxonomy:1408	Firmicutes	Bacillus pumilus	PAE4	0	0	93	3794	0.0245124	MarDB
GCF_003583265.1	/data2/marine_genomes_and_metagenomes/genomes_The_MAR_databases/prodigal_short/firmicutes/Priestia_flexa_DMTMMB08_GCF_003583265.1.fas	§insdc.gca:GCA_003583265.1	§mmp.db:MMP09932322	Bacilli	Bacillaceae	§gtdb:GCF_001591565.1	Bacillus	Bacteria|Firmicutes|Bacilli|Bacillales|Bacillaceae_H|Bacillus_C|Bacillus_C flexus	Bacteria	Bacillales	Priestia flexa§taxonomy:86664	Firmicutes	Bacillus flexus	DMTMMB08	0	0	166	3663	0.045318	MarDB
GCF_003410355.1	/data2/marine_genomes_and_metagenomes/genomes_The_MAR_databases/prodigal_short/firmicutes/Bacillus_anthracis_MCCC_1A01412_GCF_003410355.1.fas	§insdc.gca:GCA_003410355.1	§mmp.ref:MMP09789252	Bacilli	Bacillaceae	§gtdb:GCF_000181835.1	Bacillus	Bacteria|Firmicutes|Bacilli|Bacillales|Bacillaceae_G|Bacillus_A|Bacillus_A anthracis	Bacteria	Bacillales	Bacillus anthracis§taxonomy:1392	Firmicutes	Bacillus anthracis	MCCC 1A01412	0	0	155	5508	0.0281409	MarRef
GCF_002207765.1	/data2/marine_genomes_and_metagenomes/genomes_The_MAR_databases/prodigal_short/firmicutes/Calderihabitans_maritimus_KKC1_GCF_002207765.1.fas	§insdc.gca:GCA_002207765.1	§mmp.db:MMP00053944	Clostridia	Thermoanaerobacteraceae	§gtdb:GCF_002207765.1	Calderihabitans	Bacteria|Firmicutes_B|Moorellia|Calderihabitantales|Calderihabitantaceae|Calderihabitans|Calderihabitans maritimus	Bacteria	Thermoanaerobacterales	Calderihabitans maritimus§taxonomy:1246530	Firmicutes	Unclassified	KKC1	0	0	241	3138	0.0768005	MarDB
GCF_900129165.1	/data2/marine_genomes_and_metagenomes/genomes_The_MAR_databases/prodigal_short/firmicutes/Anaerotignum_propionicum_DSM_1682_GCF_900129165.1.fas	§insdc.gca:GCA_900129165.1	§mmp.db:MMP02745151	Clostridia	Lachnospiraceae	§gtdb:GCF_001561955.1	Tyzzerella	Bacteria|Firmicutes_A|Clostridia|Lachnospirales|Anaerotignaceae|Anaerotignum|Anaerotignum propionicum	Bacteria	Clostridiales	Anaerotignum propionicum DSM 1682§taxonomy:991789	Firmicutes	[Clostridium] propionicum	VPI 5303|X2|DSM 1682|ATCC 25522|NCIB 10656	0	0	99	2909	0.0340323	MarDB
GCF_001748205.1	/data2/marine_genomes_and_metagenomes/genomes_The_MAR_databases/prodigal_short/firmicutes/Bacillus_sp._F56_GCF_001748205.1.fas	§insdc.gca:GCA_001748205.1	§mmp.db:MMP00053329	Bacilli	Bacillaceae	§gtdb:GCF_000009045.1	Bacillus	Bacteria|Firmicutes|Bacilli|Bacillales|Bacillaceae|Bacillus|Bacillus subtilis	Bacteria	Bacillales	Bacillus sp. F56§taxonomy:1581850	Firmicutes	Unclassified	TP-B0611|NBRC 110487	0	0	103	4047	0.025451	MarDB
GCF_002200845.1	/data2/marine_genomes_and_metagenomes/genomes_The_MAR_databases/prodigal_short/firmicutes/Ureibacillus_sinduriensis_BLB-1_=_JCM_15800_GCF_002200845.1.fas	§insdc.gca:GCA_002200845.1	§mmp.db:MMP07255464	Bacilli	Bacillaceae	§gtdb:GCF_000772955.1	Lysinibacillus	Bacteria|Firmicutes|Bacilli|Bacillales_A|Planococcaceae|Lysinibacillus_C|Lysinibacillus_C sinduriensis	Bacteria	Bacillales	Lysinibacillus sinduriensis BLB-1 = JCM 15800§taxonomy:1384057	Firmicutes	Lysinibacillus sinduriensis	BLB-1|JCM 15800	0	0	135	3914	0.0344916	MarDB
GCF_002884435.1	/data2/marine_genomes_and_metagenomes/genomes_The_MAR_databases/prodigal_short/firmicutes/Terribacillus_goriensis_DSM_18252_GCF_002884435.1.fas	§insdc.gca:GCA_002884435.1	§mmp.db:MMP07249100	Bacilli	Bacillaceae	§gtdb:GCF_900110015.1	Terribacillus	Bacteria|Firmicutes|Bacilli|Bacillales|Amphibacillaceae|Terribacillus|Terribacillus saccharophilus	Bacteria	Bacillales	Terribacillus goriensis§taxonomy:386490	Firmicutes	Terribacillus goriensis	DSM 18252	0	0	67	3671	0.0182512	MarDB
GCF_001400055.1	/data2/marine_genomes_and_metagenomes/genomes_The_MAR_databases/prodigal_short/firmicutes/Enterococcus_faecalis_P8-1_GCF_001400055.1.fas	§insdc.gca:GCA_001400055.1	§mmp.db:MMP04100212	Bacilli	Enterococcaceae	§gtdb:GCF_000392875.1	Enterococcus	Bacteria|Firmicutes|Bacilli|Lactobacillales|Enterococcaceae|Enterococcus|Enterococcus faecalis	Bacteria	Lactobacillales	Enterococcus faecalis§taxonomy:1351	Firmicutes	Unclassified	P8-1	0	0	105	3075	0.0341463	MarDB
GCF_900094975.1	/data2/marine_genomes_and_metagenomes/genomes_The_MAR_databases/prodigal_short/firmicutes/Bacillus_enclensis_SGD-1123_GCF_900094975.1.fas	§insdc.gca:GCA_900094975.1	§mmp.db:MMP04487807	Bacilli	Bacillaceae	§gtdb:GCF_001456935.1	Bacillus	Bacteria|Firmicutes|Bacilli|Bacillales|Bacillaceae_B|Bacillus_F|Bacillus_F enclensis	Bacteria	Bacillales	Bacillus enclensis§taxonomy:1402860	Firmicutes	Unclassified	SGD-1123	0	0	87	4494	0.0193591	MarDB
GCF_003426055.1	/data2/marine_genomes_and_metagenomes/genomes_The_MAR_databases/prodigal_short/firmicutes/Paraliobacillus_sediminis_126C4_GCF_003426055.1.fas	§insdc.gca:GCA_003426055.1	§mmp.db:MMP09355200	Bacilli	Bacillaceae	0	Paraliobacillus	Bacteria|Firmicutes|Bacilli|Bacillales|Amphibacillaceae|X-1125	Bacteria	Bacillales	Paraliobacillus sediminis§taxonomy:1885916	Firmicutes	Paraliobacillus sediminis	126C4	0	0	120	4098	0.0292826	MarDB
GCF_001691735.1	/data2/marine_genomes_and_metagenomes/genomes_The_MAR_databases/prodigal_short/firmicutes/Bacillus_paralicheniformis_APC1576_GCF_001691735.1.fas	§insdc.gca:GCA_001691735.1	§mmp.db:MMP04892747	Bacilli	Bacillaceae	§gtdb:GCF_001042485.2	Bacillus	Bacteria|Firmicutes|Bacilli|Bacillales|Bacillaceae|Bacillus|Bacillus paralicheniformis	Bacteria	Bacillales	Bacillus paralicheniformis§taxonomy:1648923	Firmicutes	Unclassified	APC1576	0	0	151	4518	0.0334219	MarDB
GCF_000171335.1	/data2/marine_genomes_and_metagenomes/genomes_The_MAR_databases/prodigal_short/firmicutes/Epulopiscium_sp._'N.t._morphotype_B'_N.t._morphotype_B_GCF_000171335.1.fas	§insdc.gca:GCA_000171335.1	§mmp.db:MMP02436323	Clostridia	Clostridia (family)	§gtdb:GCF_000171335.1	Epulopiscium	Bacteria|Firmicutes_A|Clostridia|Lachnospirales|Cellulosilyticaceae|Epulopiscium_B|Epulopiscium_B sp000171335	Bacteria	Clostridiales	Epulopiscium sp. 'N.t. morphotype B'§taxonomy:420336	Firmicutes	Unclassified	N.t. morphotype B	0	0	201	2076	0.0968208	MarDB
GCF_001888485.1	/data2/marine_genomes_and_metagenomes/genomes_The_MAR_databases/prodigal_short/firmicutes/Lactiplantibacillus_plantarum_MHO2.4_GCF_001888485.1.fas	§insdc.gca:GCA_001888485.1	§mmp.db:MMP03654489	Bacilli	Lactobacillaceae	§gtdb:GCA_000615325.1	Lactobacillus	Bacteria|Firmicutes|Bacilli|Lactobacillales|Lactobacillaceae|Lactobacillus_F|Lactobacillus_F plantarum	Bacteria	Lactobacillales	Lactiplantibacillus plantarum§taxonomy:1590	Firmicutes	Unclassified	MHO2.4	0	0	163	3033	0.0537422	MarDB
GCF_008807735.1	/data2/marine_genomes_and_metagenomes/genomes_The_MAR_databases/prodigal_short/firmicutes/Bacillus_wiedmannii_SR52_GCF_008807735.1.fas	§insdc.gca:GCA_008807735.1	§mmp.ref:MMP10058771	Bacilli	Bacillaceae	§gtdb:GCF_001583695.1	Bacillus	Bacteria|Firmicutes|Bacilli|Bacillales|Bacillaceae_G|Bacillus_A|Bacillus_A	Bacteria	Bacillales	Bacillus wiedmannii§taxonomy:1890302	Firmicutes	Bacillus wiedmannii	SR52	0	0	172	5742	0.0299547	MarRef
GCF_900112455.1	/data2/marine_genomes_and_metagenomes/genomes_The_MAR_databases/prodigal_short/firmicutes/Alkalibacterium_subtropicum_DSM_23664_GCF_900112455.1.fas	§insdc.gca:GCA_900112455.1	§mmp.db:MMP04488102	Bacilli	Carnobacteriaceae	§gtdb:GCF_900112455.1	Alkalibacterium	Bacteria|Firmicutes|Bacilli|Lactobacillales|Carnobacteriaceae|Alkalibacterium|Alkalibacterium subtropicum	Bacteria	Lactobacillales	Alkalibacterium subtropicum§taxonomy:753702	Firmicutes	Unclassified	O24-2|DSM 23664|NBRC 107172	0	0	70	2310	0.030303	MarDB
GCF_001305855.1	/data2/marine_genomes_and_metagenomes/genomes_The_MAR_databases/prodigal_short/firmicutes/Rossellomorea_vietnamensis_UCD-SED5_GCF_001305855.1.fas	§insdc.gca:GCA_001305855.1	§mmp.db:MMP04013460	Bacilli	Bacillaceae	§gtdb:GCF_001305855.1	Bacillus	Bacteria|Firmicutes|Bacilli|Bacillales|Bacillaceae_B|Bacillus_F|Bacillus_F vietnamensis_A	Bacteria	Bacillales	Bacillus vietnamensis§taxonomy:218284	Firmicutes	Unclassified	UCD-SED5	0	0	146	4414	0.0330766	MarDB
GCF_001884225.1	/data2/marine_genomes_and_metagenomes/genomes_The_MAR_databases/prodigal_short/firmicutes/Bacillus_sp._N35-10-4_GCF_001884225.1.fas	§insdc.gca:GCA_001884225.1	§mmp.db:MMP05231553	Bacilli	Bacillaceae	§gtdb:GCF_000832805.1	Bacillus	Bacteria|Firmicutes|Bacilli|Bacillales|Bacillaceae_G|Bacillus_A|Bacillus_A cereus_T	Bacteria	Bacillales	Bacillus sp. N35-10-4§taxonomy:1866315	Firmicutes	Unclassified	N35-10-4	0	0	188	5616	0.0334758	MarDB
GCF_005577435.1	/data2/marine_genomes_and_metagenomes/genomes_The_MAR_databases/prodigal_short/firmicutes/Paenibacillus_sp._HB172198_GCF_005577435.1.fas	§insdc.gca:GCA_005577435.1	§mmp.ref:MMP11382402	Bacilli	Paenibacillaceae	§gtdb:GCF_000987955.1	Paenibacillus	Bacteria|Firmicutes_I|Bacilli_A|Paenibacillales|Paenibacillaceae|Paenibacillus	Bacteria	Bacillales	Paenibacillus sp. HB172198§taxonomy:2565926	Firmicutes	Paenibacillus sp. HB172198	HB172198	0	0	134	4107	0.0326272	MarRef
GCF_000009785.1	/data2/marine_genomes_and_metagenomes/genomes_The_MAR_databases/prodigal_short/firmicutes/Geobacillus_kaustophilus_HTA426_GCF_000009785.1.fas	§insdc.gca:GCA_000009785.1	§mmp.ref:MMP00061072	Bacilli	Bacillaceae	§gtdb:GCF_001610955.1	Geobacillus	Bacteria|Firmicutes|Bacilli|Bacillales|Anoxybacillaceae|Geobacillus|Geobacillus thermoleovorans	Bacteria	Bacillales	Geobacillus kaustophilus HTA426§taxonomy:235909	Firmicutes	Geobacillus kaustophilus	HTA426	0	0	90	3603	0.0249792	MarRef
GCF_900177535.1	/data2/marine_genomes_and_metagenomes/genomes_The_MAR_databases/prodigal_short/firmicutes/Priestia_filamentosa_SGD-14_GCF_900177535.1.fas	§insdc.gca:GCA_900177535.1	§mmp.db:MMP06296056	Bacilli	Bacillaceae	§gtdb:GCF_900177535.1	Bacillus	Bacteria|Firmicutes|Bacilli|Bacillales|Bacillaceae_H|Bacillus_I|Bacillus_I filamentosus	Bacteria	Bacillales	Priestia filamentosa§taxonomy:1402861	Firmicutes	Unclassified	SGD-14|DSM 27955|NCIM 5491	0	0	147	5163	0.0284718	MarDB
GCF_900186165.1	/data2/marine_genomes_and_metagenomes/genomes_The_MAR_databases/prodigal_short/firmicutes/Listeria_goaensis_ILCC793_GCF_900186165.1.fas	§insdc.gca:GCA_900186165.1	§mmp.db:MMP104121262	Bacilli	Listeriaceae	§gtdb:GCF_900186165.1	Listeria	Bacteria|Firmicutes|Bacilli|Lactobacillales|Listeriaceae|Listeria|Listeria sp900186165	Bacteria	Bacillales	Listeria goaensis§taxonomy:1649188	Firmicutes	Unclassified	Listeria sp. ILCC793	0	0	79	2654	0.0297664	MarDB
GCF_001730005.1	/data2/marine_genomes_and_metagenomes/genomes_The_MAR_databases/prodigal_short/firmicutes/Planococcus_maritimus_SAMP_GCF_001730005.1.fas	§insdc.gca:GCA_001730005.1	§mmp.db:MMP05728460	Bacilli	Planococcaceae	§gtdb:GCF_001592825.1	Planococcus	Bacteria|Firmicutes|Bacilli|Bacillales_A|Planococcaceae|Planococcus_B|Planococcus_B maritimus_B	Bacteria	Bacillales	Planococcus maritimus§taxonomy:192421	Firmicutes	Unclassified	SAMP	0	0	85	3212	0.0264633	MarDB
GCF_900101075.1	/data2/marine_genomes_and_metagenomes/genomes_The_MAR_databases/prodigal_short/firmicutes/Salinicoccus_qingdaonensis_CGMCC_1.8895_GCF_900101075.1.fas	§insdc.gca:GCA_900101075.1	§mmp.db:MMP05216216	Bacilli	Staphylococcaceae	§gtdb:GCF_900101075.1	Salinicoccus	Bacteria|Firmicutes|Bacilli|Staphylococcales|Salinicoccaceae|Salinicoccus|Salinicoccus qingdaonensis	Bacteria	Bacillales	Salinicoccus qingdaonensis§taxonomy:576118	Firmicutes	Unclassified	CGMCC 1.8895	0	0	184	2742	0.0671043	MarDB
GCF_001884145.1	/data2/marine_genomes_and_metagenomes/genomes_The_MAR_databases/prodigal_short/firmicutes/Bacillus_sp._L27_GCF_001884145.1.fas	§insdc.gca:GCA_001884145.1	§mmp.db:MMP05231548	Bacilli	Bacillaceae	§gtdb:GCF_000832805.1	Bacillus	Bacteria|Firmicutes|Bacilli|Bacillales|Bacillaceae_G|Bacillus_A|Bacillus_A cereus_T	Bacteria	Bacillales	Bacillus sp. L27§taxonomy:1866312	Firmicutes	Unclassified	L27	0	0	182	5382	0.0338164	MarDB
GCF_000818095.1	/data2/marine_genomes_and_metagenomes/genomes_The_MAR_databases/prodigal_short/firmicutes/Jeotgalibacillus_malaysiensis_malaysiensis_GCF_000818095.1.fas	§insdc.gca:GCA_000818095.1	§mmp.ref:MMP02870886	Bacilli	Planococcaceae	§gtdb:GCF_000818095.1	Jeotgalibacillus	Bacteria|Firmicutes|Bacilli|Bacillales|Jeotgalibacillaceae|Jeotgalibacillus|Jeotgalibacillus malaysiensis	Bacteria	Bacillales	Jeotgalibacillus malaysiensis§taxonomy:1508404	Firmicutes	Jeotgalibacillus malaysiensis	D5|DSM 28777|KCTC 33550	0	0	110	4375	0.0251429	MarRef
GCF_003073175.1	/data2/marine_genomes_and_metagenomes/genomes_The_MAR_databases/prodigal_short/firmicutes/Peribacillus_acanthi_L28_GCF_003073175.1.fas	§insdc.gca:GCA_003073175.1	§mmp.db:MMP08913591	Bacilli	Bacillaceae	§gtdb:GCF_003073175.1	Bacillus	Bacteria|Firmicutes|Bacilli|Bacillales|Bacillaceae_A|XY-L28|XY-L28 sp003073175	Bacteria	Bacillales	Peribacillus acanthi§taxonomy:2171554	Firmicutes	Bacillus acanthi	XY-L28	0	0	144	4074	0.0353461	MarDB
GCF_000269925.1	/data2/marine_genomes_and_metagenomes/genomes_The_MAR_databases/prodigal_short/firmicutes/Lactococcus_garvieae_ATCC_49156_GCF_000269925.1.fas	§insdc.gca:GCA_000269925.1	§mmp.ref:MMP02596969	Bacilli	Streptococcaceae	§gtdb:GCF_000269925.1	Lactococcus	Bacteria|Firmicutes|Bacilli|Lactobacillales|Streptococcaceae|Lactococcus|Lactococcus garvieae	Bacteria	Lactobacillales	Lactococcus garvieae ATCC 49156§taxonomy:420889	Firmicutes	Lactococcus garvieae	YT-3|ATCC 49156|DSM 6783|NCIMB 13208	0	0	325	1931	0.168307	MarRef
GCF_001594005.1	/data2/marine_genomes_and_metagenomes/genomes_The_MAR_databases/prodigal_short/firmicutes/Clostridium_tepidiprofundi_DSM_19306_GCF_001594005.1.fas	§insdc.gca:GCA_001594005.1	§mmp.db:MMP04516102	Clostridia	Clostridiaceae	§gtdb:GCF_001594005.1	Clostridium	Bacteria|Firmicutes_A|Clostridia|Clostridiales|Clostridiaceae|Clostridium_AC|Clostridium_AC tepidiprofundi	Bacteria	Clostridiales	Clostridium tepidiprofundi DSM 19306§taxonomy:1121338	Firmicutes	Clostridium tepidiprofundi	SG 508	0	0	300	2874	0.104384	MarDB
GCF_001692115.1	/data2/marine_genomes_and_metagenomes/genomes_The_MAR_databases/prodigal_short/firmicutes/Bacillus_velezensis_V4_GCF_001692115.1.fas	§insdc.gca:GCA_001692115.1	§mmp.db:MMP05375008	Bacilli	Bacillaceae	§gtdb:GCF_001461825.1	Bacillus	Bacteria|Firmicutes|Bacilli|Bacillales|Bacillaceae|Bacillus|Bacillus velezensis	Bacteria	Bacillales	Bacillus velezensis§taxonomy:492670	Firmicutes	Unclassified	V4	0	0	130	3782	0.0343733	MarDB
GCF_000789355.1	/data2/marine_genomes_and_metagenomes/genomes_The_MAR_databases/prodigal_short/firmicutes/Clostridium_botulinum_202F_GCF_000789355.1.fas	§insdc.gca:GCA_000789355.1	§mmp.ref:MMP03222822	Clostridia	Clostridiaceae	§gtdb:GCF_000020165.1	Clostridium	Bacteria|Firmicutes_A|Clostridia|Clostridiales|Clostridiaceae|Clostridium|Clostridium botulinum_B	Bacteria	Clostridiales	Clostridium botulinum 202F§taxonomy:1415774	Firmicutes	Clostridium botulinum	202F	0	0	164	3723	0.0440505	MarRef
GCF_001906925.1	/data2/marine_genomes_and_metagenomes/genomes_The_MAR_databases/prodigal_short/firmicutes/Domibacillus_mangrovi_SAOS_44_GCF_001906925.1.fas	§insdc.gca:GCA_001906925.1	§mmp.db:MMP05946062	Bacilli	Bacillaceae	§gtdb:GCF_001906925.1	Domibacillus	Bacteria|Firmicutes|Bacilli|Bacillales|Domibacillaceae|Domibacillus|Domibacillus mangrovi	Bacteria	Bacillales	Domibacillus mangrovi§taxonomy:1714354	Firmicutes	Unclassified	SAOS 44	0	0	137	3342	0.0409934	MarDB
GCF_000775615.1	/data2/marine_genomes_and_metagenomes/genomes_The_MAR_databases/prodigal_short/firmicutes/Pontibacillus_litoralis_JSM_072002_GCF_000775615.1.fas	§insdc.gca:GCA_000775615.1	§mmp.db:MMP03177048	Bacilli	Bacillaceae	§gtdb:GCF_000775615.1	Pontibacillus	Bacteria|Firmicutes|Bacilli|Bacillales|Halobacillaceae_A|Pontibacillus|Pontibacillus litoralis	Bacteria	Bacillales	Pontibacillus litoralis JSM 072002§taxonomy:1385512	Firmicutes	Pontibacillus litoralis	JSM 072002	0	0	113	3230	0.0349845	MarDB
GCF_009738125.1	/data2/marine_genomes_and_metagenomes/genomes_The_MAR_databases/prodigal_short/firmicutes/Carnobacterium_maltaromaticum_18ISCm_GCF_009738125.1.fas	§insdc.gca:GCA_009738125.1	§mmp.ref:MMP12990248	Bacilli	Carnobacteriaceae	§gtdb:GCF_000744945.1	Carnobacterium	Bacteria|Firmicutes|Bacilli|Lactobacillales|Carnobacteriaceae|Carnobacterium|Carnobacterium	Bacteria	Lactobacillales	Carnobacterium maltaromaticum§taxonomy:2751	Firmicutes	Carnobacterium maltaromaticum	18ISCm	0	0	136	3903	0.034845	MarRef
GCF_009740005.1	/data2/marine_genomes_and_metagenomes/genomes_The_MAR_databases/prodigal_short/firmicutes/Bacillus_albus_DLOU-Yingkou_GCF_009740005.1.fas	§insdc.gca:GCA_009740005.1	§mmp.ref:MMP10739311	Bacilli	Bacillaceae	§gtdb:GCF_002146655.1	Bacillus	Bacteria|Firmicutes|Bacilli|Bacillales|Bacillaceae_G|Bacillus_A|Bacillus_A	Bacteria	Bacillales	Bacillus albus§taxonomy:2026189	Firmicutes	Bacillus albus	DLOU-Yingkou	0	0	255	5951	0.0428499	MarRef
GCF_005960665.1	/data2/marine_genomes_and_metagenomes/genomes_The_MAR_databases/prodigal_short/firmicutes/Exiguobacterium_mexicanum_A-EM_GCF_005960665.1.fas	§insdc.gca:GCA_005960665.1	§mmp.ref:MMP11621492	Bacilli	unclassified	§gtdb:GCF_000763125.1	Exiguobacterium	Bacteria|Firmicutes|Bacilli|Exiguobacterales|Exiguobacteraceae|Exiguobacterium|Exiguobacterium	Bacteria	Bacillales	Exiguobacterium mexicanum§taxonomy:340146	Firmicutes	Exiguobacterium mexicanum	A-EM	0	0	75	2767	0.0271052	MarRef
GCF_001883945.1	/data2/marine_genomes_and_metagenomes/genomes_The_MAR_databases/prodigal_short/firmicutes/Bacillus_thuringiensis_FN31_GCF_001883945.1.fas	§insdc.gca:GCA_001883945.1	§mmp.db:MMP05231665	Bacilli	Bacillaceae	§gtdb:GCA_002243685.1	Bacillus	Bacteria|Firmicutes|Bacilli|Bacillales|Bacillaceae_G|Bacillus_A|Bacillus_A thuringiensis	Bacteria	Bacillales	Bacillus thuringiensis§taxonomy:1428	Firmicutes	Unclassified	FN31|MCCC 1A00361	0	0	256	5914	0.0432871	MarDB
GCF_000503755.1	/data2/marine_genomes_and_metagenomes/genomes_The_MAR_databases/prodigal_short/firmicutes/Bacillus_thuringiensis_JM-Mgvxx-63_GCF_000503755.1.fas	§insdc.gca:GCA_000503755.1	§mmp.db:MMP02402225	Bacilli	Bacillaceae	§gtdb:GCA_002243685.1	Bacillus	Bacteria|Firmicutes|Bacilli|Bacillales|Bacillaceae_G|Bacillus_A|Bacillus_A thuringiensis	Bacteria	Bacillales	Bacillus thuringiensis JM-Mgvxx-63§taxonomy:1423139	Firmicutes	Bacillus thuringiensis	JM-Mgvxx-63	0	0	237	5109	0.0463887	MarDB
GCF_000732905.1	/data2/marine_genomes_and_metagenomes/genomes_The_MAR_databases/prodigal_short/firmicutes/Weissella_ceti_WS08_GCF_000732905.1.fas	§insdc.gca:GCA_000732905.1	§mmp.ref:MMP02716090	Bacilli	Leuconostocaceae	§gtdb:GCF_000750535.1	Weissella	Bacteria|Firmicutes|Bacilli|Lactobacillales|Lactobacillaceae|Weissella|Weissella ceti	Bacteria	Lactobacillales	Weissella ceti§taxonomy:759620	Firmicutes	Weissella ceti	WS08	0	0	30	1277	0.0234926	MarRef
GCF_002237775.1	/data2/marine_genomes_and_metagenomes/genomes_The_MAR_databases/prodigal_short/firmicutes/Domibacillus_enclensis_DSM_25145_GCF_002237775.1.fas	§insdc.gca:GCA_002237775.1	§mmp.db:MMP06319218	Bacilli	Bacillaceae	§gtdb:GCF_900156125.1	Domibacillus	Bacteria|Firmicutes|Bacilli|Bacillales|Domibacillaceae|Domibacillus|Domibacillus enclensis	Bacteria	Bacillales	Domibacillus enclensis§taxonomy:1017273	Firmicutes	Unclassified	NIO-1016|DSM 25145|CCTCC AB|NCIM 5462	0	0	115	3781	0.0304152	MarDB
GCF_900005095.1	/data2/marine_genomes_and_metagenomes/genomes_The_MAR_databases/prodigal_short/firmicutes/Carnobacterium_maltaromaticum_ML_1_97_GCF_900005095.1.fas	§insdc.gca:GCA_900005095.1	§mmp.db:MMP3339669	Bacilli	Carnobacteriaceae	§gtdb:GCF_000744945.1	Carnobacterium	Bacteria|Firmicutes|Bacilli|Lactobacillales|Carnobacteriaceae|Carnobacterium|Carnobacterium maltaromaticum	Bacteria	Lactobacillales	Carnobacterium maltaromaticum§taxonomy:2751	Firmicutes	Unclassified	ML_1_97	0	0	321	3322	0.0966285	MarDB
GCF_001316435.1	/data2/marine_genomes_and_metagenomes/genomes_The_MAR_databases/prodigal_short/firmicutes/Caloranaerobacter_sp._TR13_GCF_001316435.1.fas	§insdc.gca:GCA_001316435.1	§mmp.db:MMP03283895	Clostridia	Clostridiaceae	§gtdb:GCF_001316435.1	Caloranaerobacter	Bacteria|Firmicutes_A|Clostridia|Tissierellales|Caloranaerobacteraceae|Caloranaerobacter|Caloranaerobacter sp001316435	Bacteria	Clostridiales	Caloranaerobacter sp. TR13§taxonomy:1302151	Firmicutes	Unclassified	TR13	0	0	90	2214	0.0406504	MarDB
GCF_000699585.2	/data2/marine_genomes_and_metagenomes/genomes_The_MAR_databases/prodigal_short/firmicutes/Peptoclostridium_litorale_DSM_5388_W6_GCF_000699585.2.fas	§insdc.gca:GCA_000699585.1	§mmp.db:MMP02688025	Clostridia	Peptostreptococcaceae	§gtdb:GCF_900141635.1	Peptoclostridium	Bacteria|Firmicutes_A|Clostridia|Peptostreptococcales|Peptoclostridiaceae|Peptoclostridium|Peptoclostridium litorale	Bacteria	Clostridiales	Peptoclostridium litorale DSM 5388§taxonomy:1121324	Firmicutes	Peptoclostridium litorale	W6	0	0	102	3138	0.0325048	MarDB
GCF_000772955.1	/data2/marine_genomes_and_metagenomes/genomes_The_MAR_databases/prodigal_short/firmicutes/Ureibacillus_sinduriensis_BLB-1_=_JCM_15800_GCF_000772955.1.fas	§insdc.gca:GCA_000772955.1	§mmp.db:MMP02953198	Bacilli	Bacillaceae	§gtdb:GCF_000772955.1	Lysinibacillus	Bacteria|Firmicutes|Bacilli|Bacillales_A|Planococcaceae|Lysinibacillus_C|Lysinibacillus_C sinduriensis	Bacteria	Bacillales	Lysinibacillus sinduriensis BLB-1 = JCM 15800§taxonomy:1384057	Firmicutes	Lysinibacillus sinduriensis	BLB-1|KCTC 13296	0	0	135	3914	0.0344916	MarDB
GCF_003814515.1	/data2/marine_genomes_and_metagenomes/genomes_The_MAR_databases/prodigal_short/firmicutes/Salinicoccus_roseus_DSM_5351_GCF_003814515.1.fas	§insdc.gca:GCA_003814515.1	§mmp.db:MMP10363435	Bacilli	Staphylococcaceae	§gtdb:GCF_000819905.1	Salinicoccus	Bacteria|Firmicutes|Bacilli|Staphylococcales|Salinicoccaceae|Salinicoccus|Salinicoccus roseus	Bacteria	Bacillales	Salinicoccus roseus§taxonomy:45670	Firmicutes	Salinicoccus roseus	DSM 5351	0	0	74	2487	0.0297547	MarDB
GCF_900142285.1	/data2/marine_genomes_and_metagenomes/genomes_The_MAR_databases/prodigal_short/firmicutes/Caminicella_sporogenes_DSM_14501_GCF_900142285.1.fas	§insdc.gca:GCA_900142285.1	§mmp.db:MMP02745883	Clostridia	Clostridiaceae	§gtdb:GCF_900142285.1	Caminicella	Bacteria|Firmicutes_A|Clostridia|Peptostreptococcales|Caminicellaceae|Caminicella|Caminicella sporogenes	Bacteria	Clostridiales	Caminicella sporogenes DSM 14501§taxonomy:1121266	Firmicutes	Caminicella sporogenes	AM 1114|DSM 14501|CIP 107141	0	0	133	2377	0.0559529	MarDB
GCF_900186155.1	/data2/marine_genomes_and_metagenomes/genomes_The_MAR_databases/prodigal_short/firmicutes/Listeria_sp._ILCC804_GCF_900186155.1.fas	§insdc.gca:GCA_900186155.1	§mmp.db:MMP104121266	Bacilli	Listeriaceae	§gtdb:GCF_900186165.1	Listeria	Bacteria|Firmicutes|Bacilli|Lactobacillales|Listeriaceae|Listeria|Listeria sp900186165	Bacteria	Bacillales	Listeria goaensis§taxonomy:1649188	Firmicutes	Unclassified	Listeria sp. ILCC804	0	0	87	2814	0.0309168	MarDB
GCF_001895885.1	/data2/marine_genomes_and_metagenomes/genomes_The_MAR_databases/prodigal_short/firmicutes/Bacillus_safensis_KCTC_12796BP_GCF_001895885.1.fas	§insdc.gca:GCA_001895885.1	§mmp.ref:MMP06016472	Bacilli	Bacillaceae	§gtdb:GCF_000691165.1	Bacillus	Bacteria|Firmicutes|Bacilli|Bacillales|Bacillaceae|Bacillus|Bacillus safensis	Bacteria	Bacillales	Bacillus safensis§taxonomy:561879	Firmicutes	Unclassified	KCTC 12796BP	0	0	100	4025	0.0248447	MarRef
GCF_000750535.1	/data2/marine_genomes_and_metagenomes/genomes_The_MAR_databases/prodigal_short/firmicutes/Weissella_ceti_WS105_GCF_000750535.1.fas	§insdc.gca:GCA_000750535.1	§mmp.ref:MMP02947896	Bacilli	Leuconostocaceae	§gtdb:GCF_000750535.1	Weissella	Bacteria|Firmicutes|Bacilli|Lactobacillales|Lactobacillaceae|Weissella|Weissella ceti	Bacteria	Lactobacillales	Weissella ceti§taxonomy:759620	Firmicutes	Weissella ceti	WS105	0	0	78	1362	0.0572687	MarRef
GCF_900129995.1	/data2/marine_genomes_and_metagenomes/genomes_The_MAR_databases/prodigal_short/firmicutes/Caloranaerobacter_azorensis_DSM_13643_GCF_900129995.1.fas	§insdc.gca:GCA_900129995.1	§mmp.db:MMP02745135	Clostridia	Clostridiaceae	§gtdb:GCF_900129995.1	Caloranaerobacter	Bacteria|Firmicutes_A|Clostridia|Tissierellales|Caloranaerobacteraceae|Caloranaerobacter|Caloranaerobacter azorensis	Bacteria	Clostridiales	Caloranaerobacter azorensis DSM 13643§taxonomy:1121264	Firmicutes	Unclassified	MV1087|DSM 13643|CNCM I-2543	0	0	230	2569	0.089529	MarDB
GCF_900142235.1	/data2/marine_genomes_and_metagenomes/genomes_The_MAR_databases/prodigal_short/firmicutes/Tepidibacter_formicigenes_DSM_15518_GCF_900142235.1.fas	§insdc.gca:GCA_900142235.1	§mmp.db:MMP02744037	Clostridia	Peptostreptococcaceae	§gtdb:GCF_900142235.1	Tepidibacter	Bacteria|Firmicutes_A|Clostridia|Peptostreptococcales|Peptostreptococcaceae|Tepidibacter|Tepidibacter formicigenes	Bacteria	Clostridiales	Tepidibacter formicigenes DSM 15518§taxonomy:1123349	Firmicutes	Tepidibacter formicigenes	DV 1184|DSM 15518|CIP 107893	0	0	173	2728	0.0634164	MarDB
GCF_001748185.1	/data2/marine_genomes_and_metagenomes/genomes_The_MAR_databases/prodigal_short/firmicutes/Brevibacillus_brevis_NBRC_110488_GCF_001748185.1.fas	§insdc.gca:GCA_001748185.1	§mmp.db:MMP00053328	Bacilli	Paenibacillaceae	§gtdb:GCF_000296715.2	Brevibacillus	Bacteria|Firmicutes_I|Bacilli_A|Brevibacillales|Brevibacillaceae|Brevibacillus|Brevibacillus brevis_B	Bacteria	Bacillales	Brevibacillus brevis§taxonomy:1393	Firmicutes	Unclassified	GB4IS|TP-B0800|NBRC 110488	0	0	155	5994	0.0258592	MarDB
GCF_001465835.2	/data2/marine_genomes_and_metagenomes/genomes_The_MAR_databases/prodigal_short/firmicutes/Planococcus_kocurii_ATCC_43650_GCF_001465835.2.fas	§insdc.gca:GCA_001465835.2	§mmp.ref:MMP04331436	Bacilli	Planococcaceae	§gtdb:GCF_001465835.2	Planococcus	Bacteria|Firmicutes|Bacilli|Bacillales_A|Planococcaceae|Planococcus_A|Planococcus_A kocurii	Bacteria	Bacillales	Planococcus kocurii§taxonomy:1374	Firmicutes	Planococcus kocurii	HK 701|ATCC 43650|DSM 20747|CCM 1849|JCM 2569|NCMB 629	0	0	92	3353	0.0274381	MarRef
GCF_000735115.1	/data2/marine_genomes_and_metagenomes/genomes_The_MAR_databases/prodigal_short/firmicutes/Bacillus_subtilis_GXA-28_GCF_000735115.1.fas	§insdc.gca:GCA_000735115.1	§mmp.db:MMP02903909	Bacilli	Bacillaceae	§gtdb:GCF_000009045.1	Bacillus	Bacteria|Firmicutes|Bacilli|Bacillales|Bacillaceae|Bacillus|Bacillus subtilis	Bacteria	Bacillales	Bacillus subtilis§taxonomy:1423	Firmicutes	Unclassified	GXA-28	0	0	127	4338	0.0292762	MarDB
GCF_900129965.1	/data2/marine_genomes_and_metagenomes/genomes_The_MAR_databases/prodigal_short/firmicutes/Clostridium_grantii_DSM_8605_GCF_900129965.1.fas	§insdc.gca:GCA_900129965.1	§mmp.db:MMP02745207	Clostridia	Clostridiaceae	§gtdb:GCF_900129965.1	Clostridium	Bacteria|Firmicutes_A|Clostridia|Clostridiales|Clostridiaceae|Clostridium_AF|Clostridium_AF grantii	Bacteria	Clostridiales	Clostridium grantii DSM 8605§taxonomy:1121316	Firmicutes	Clostridium grantii	A-1|DSM 8605|CIP 105529	0	0	304	4247	0.0715799	MarDB
GCF_001883975.1	/data2/marine_genomes_and_metagenomes/genomes_The_MAR_databases/prodigal_short/firmicutes/Bacillus_cereus_Co15_GCF_001883975.1.fas	§insdc.gca:GCA_001883975.1	§mmp.db:MMP05230498	Bacilli	Bacillaceae	§gtdb:GCF_000007825.1	Bacillus	Bacteria|Firmicutes|Bacilli|Bacillales|Bacillaceae_G|Bacillus_A|Bacillus_A cereus	Bacteria	Bacillales	Bacillus cereus§taxonomy:1396	Firmicutes	Unclassified	Co15|MCCC 1A00432	0	0	236	5677	0.0415713	MarDB
GCF_001857985.1	/data2/marine_genomes_and_metagenomes/genomes_The_MAR_databases/prodigal_short/firmicutes/Bacillus_velezensis_9912D_GCF_001857985.1.fas	§insdc.gca:GCA_001857985.1	§mmp.ref:MMP05517979	Bacilli	Bacillaceae	§gtdb:GCF_001461825.1	Bacillus	Bacteria|Firmicutes|Bacilli|Bacillales|Bacillaceae|Bacillus|Bacillus velezensis	Bacteria	Bacillales	Bacillus velezensis§taxonomy:492670	Firmicutes	Unclassified	9912D	0	0	127	4243	0.0299317	MarRef
GCF_005234095.1	/data2/marine_genomes_and_metagenomes/genomes_The_MAR_databases/prodigal_short/firmicutes/Bacillus_subtilis_H19_GCF_005234095.1.fas	§insdc.gca:GCA_005234095.1	§mmp.ref:MMP11519450	Bacilli	Bacillaceae	§gtdb:GCF_000009045.1	Bacillus	Bacteria|Firmicutes|Bacilli|Bacillales|Bacillaceae|Bacillus|Bacillus	Bacteria	Bacillales	Bacillus subtilis§taxonomy:1423	Firmicutes	Bacillus subtilis	H19	0	0	96	4029	0.0238273	MarRef
GCF_900115605.1	/data2/marine_genomes_and_metagenomes/genomes_The_MAR_databases/prodigal_short/firmicutes/Halolactibacillus_halophilus_DSM_17073_GCF_900115605.1.fas	§insdc.gca:GCA_900115605.1	§mmp.db:MMP05421839	Bacilli	Bacillaceae	§gtdb:GCF_900115605.1	Halolactibacillus	Bacteria|Firmicutes|Bacilli|Bacillales|Amphibacillaceae|Halolactibacillus|Halolactibacillus halophilus	Bacteria	Bacillales	Halolactibacillus halophilus§taxonomy:306540	Firmicutes	Unclassified	M2-2|DSM 17073|IAM 15242|NBRC 100868|NRIC 0628	0	0	130	2638	0.0492798	MarDB
GCF_900141635.1	/data2/marine_genomes_and_metagenomes/genomes_The_MAR_databases/prodigal_short/firmicutes/Peptoclostridium_litorale_DSM_5388_GCF_900141635.1.fas	§insdc.gca:GCA_900141635.1	§mmp.db:MMP02745945	Clostridia	Peptostreptococcaceae	§gtdb:GCF_900141635.1	Peptoclostridium	Bacteria|Firmicutes_A|Clostridia|Peptostreptococcales|Peptoclostridiaceae|Peptoclostridium|Peptoclostridium litorale	Bacteria	Clostridiales	Peptoclostridium litorale DSM 5388§taxonomy:1121324	Firmicutes	Unclassified	W6|DSM 5388|ATCC 49638	0	0	97	2983	0.0325176	MarDB
GCF_900129865.1	/data2/marine_genomes_and_metagenomes/genomes_The_MAR_databases/prodigal_short/firmicutes/Virgibacillus_chiguensis_CGMCC_1.6496_GCF_900129865.1.fas	§insdc.gca:GCA_900129865.1	§mmp.db:MMP05421807	Bacilli	Bacillaceae	§gtdb:GCF_900129865.1	Virgibacillus	Bacteria|Firmicutes|Bacilli|Bacillales|Amphibacillaceae|Virgibacillus|Virgibacillus chiguensis	Bacteria	Bacillales	Virgibacillus chiguensis§taxonomy:411959	Firmicutes	Unclassified	NTU-101|CGMCC 1.6496|BCRC 17637	0	0	144	3893	0.0369895	MarDB
GCF_001742425.1	/data2/marine_genomes_and_metagenomes/genomes_The_MAR_databases/prodigal_short/firmicutes/Bacillus_solimangrovi_GH2-4_GCF_001742425.1.fas	§insdc.gca:GCA_001742425.1	§mmp.db:MMP05526266	Bacilli	Bacillaceae	§gtdb:GCF_001742425.1	Bacillus	Bacteria|Firmicutes|Bacilli|Bacillales|Bacillaceae_N|Bacillus_AV|Bacillus_AV solimangrovi	Bacteria	Bacillales	Bacillus solimangrovi§taxonomy:1305675	Firmicutes	Unclassified	GH2-4	0	0	146	3736	0.0390792	MarDB
GCF_002270055.1	/data2/marine_genomes_and_metagenomes/genomes_The_MAR_databases/prodigal_short/firmicutes/Anaeromicrobium_sediminis_DY2726D_GCF_002270055.1.fas	§insdc.gca:GCA_002270055.1	§mmp.db:MMP07184001	Clostridia	Clostridiaceae	§gtdb:GCF_002270055.1	Anaeromicrobium	Bacteria|Firmicutes_A|Clostridia|Peptostreptococcales|Thermotaleaceae|Anaeromicrobium|Anaeromicrobium sediminis	Bacteria	Clostridiales	Anaeromicrobium sediminis§taxonomy:1478221	Firmicutes	Unclassified	DY2726D	0	0	180	4406	0.0408534	MarDB
GCF_002954145.1	/data2/marine_genomes_and_metagenomes/genomes_The_MAR_databases/prodigal_short/firmicutes/Clostridium_acetobutylicum_WA_GCF_002954145.1.fas	§insdc.gca:GCA_002954145.1	§mmp.db:MMP08111980	Clostridia	Clostridiaceae	§gtdb:GCF_000008765.1	Clostridium	Bacteria|Firmicutes_A|Clostridia|Clostridiales|Clostridiaceae|Clostridium_S|Clostridium_S acetobutylicum	Bacteria	Clostridiales	Clostridium acetobutylicum§taxonomy:1488	Firmicutes	Clostridium acetobutylicum	WA	0	0	219	3914	0.055953	MarDB
GCF_000175795.2	/data2/marine_genomes_and_metagenomes/genomes_The_MAR_databases/prodigal_short/firmicutes/Ruminiclostridium_papyrosolvens_DSM_2782_GCF_000175795.2.fas	§insdc.gca:GCA_000175795.2	§mmp.db:MMP00002727	Clostridia	Ruminococcaceae	§gtdb:GCF_000175795.2	Ruminiclostridium	Bacteria|Firmicutes_A|Clostridia|Acetivibrionales|Acetivibrionaceae|Ruminiclostridium_A|Ruminiclostridium_A papyrosolvens	Bacteria	Clostridiales	Ruminiclostridium papyrosolvens DSM 2782§taxonomy:588581	Firmicutes	[Clostridium] papyrosolvens	0	0	0	209	4292	0.0486952	MarDB
GCF_900116255.1	/data2/marine_genomes_and_metagenomes/genomes_The_MAR_databases/prodigal_short/firmicutes/Halolactibacillus_miurensis_DSM_17074_GCF_900116255.1.fas	§insdc.gca:GCA_900116255.1	§mmp.db:MMP05421668	Bacilli	Bacillaceae	§gtdb:GCF_900116255.1	Halolactibacillus	Bacteria|Firmicutes|Bacilli|Bacillales|Amphibacillaceae|Halolactibacillus|Halolactibacillus miurensis	Bacteria	Bacillales	Halolactibacillus miurensis§taxonomy:306541	Firmicutes	Unclassified	M23-1|DSM 17074|IAM 15247|NBRC 100873|NRIC 0633	0	0	113	3036	0.03722	MarDB
GCF_001541965.1	/data2/marine_genomes_and_metagenomes/genomes_The_MAR_databases/prodigal_short/firmicutes/Priestia_megaterium_PE5-112_GCF_001541965.1.fas	§insdc.gca:GCA_001541965.1	§mmp.db:MMP04432436	Bacilli	Bacillaceae	§gtdb:GCF_000832985.1	Bacillus	Bacteria|Firmicutes|Bacilli|Bacillales|Bacillaceae_H|Bacillus_C|Bacillus_C megaterium	Bacteria	Bacillales	Priestia megaterium§taxonomy:1404	Firmicutes	Unclassified	PE5112	0	0	240	5650	0.0424779	MarDB
GCF_000283255.1	/data2/marine_genomes_and_metagenomes/genomes_The_MAR_databases/prodigal_short/firmicutes/Priestia_filamentosa_2102_GCF_000283255.1.fas	§insdc.gca:GCA_000283255.1	§mmp.db:MMP02470187	Bacilli	Bacillaceae	§gtdb:GCF_900177535.1	Bacillus	Bacteria|Firmicutes|Bacilli|Bacillales|Bacillaceae_H|Bacillus_I|Bacillus_I filamentosus	Bacteria	Bacillales	Bacillus endophyticus 2102§taxonomy:1196029	Firmicutes	Bacillus endophyticus	Mycoplasma mycoides§taxonomy:2102	0	0	137	5108	0.0268207	MarDB
GCF_001884205.1	/data2/marine_genomes_and_metagenomes/genomes_The_MAR_databases/prodigal_short/firmicutes/Bacillus_sp._NH11B_GCF_001884205.1.fas	§insdc.gca:GCA_001884205.1	§mmp.db:MMP05231552	Bacilli	Bacillaceae	§gtdb:GCF_002582595.1	Bacillus	Bacteria|Firmicutes|Bacilli|Bacillales|Bacillaceae_G|Bacillus_A|Bacillus_A cereus_AY	Bacteria	Bacillales	Bacillus sp. NH11B§taxonomy:1866314	Firmicutes	Unclassified	NH11B	0	0	346	6049	0.0571995	MarDB
GCF_002140375.1	/data2/marine_genomes_and_metagenomes/genomes_The_MAR_databases/prodigal_short/firmicutes/Enterococcus_faecium_11F10_MSG5009_GCF_002140375.1.fas	§insdc.gca:GCA_002140375.1	§mmp.db:MMP04634039	Bacilli	Enterococcaceae	§gtdb:GCF_001544255.1	Enterococcus	Bacteria|Firmicutes|Bacilli|Lactobacillales|Enterococcaceae|Enterococcus_B|Enterococcus_B faecium	Bacteria	Lactobacillales	Enterococcus faecium§taxonomy:1352	Firmicutes	Unclassified	11F10_MSG5009	0	0	77	2588	0.0297527	MarDB
GCF_000620845.1	/data2/marine_genomes_and_metagenomes/genomes_The_MAR_databases/prodigal_short/firmicutes/Exiguobacterium_marinum_DSM_16307_GCF_000620845.1.fas	§insdc.gca:GCA_000620845.1	§mmp.db:MMP02743964	Bacilli	Unclassified	§gtdb:GCF_000620845.1	Unclassified	Bacteria|Firmicutes|Bacilli|Exiguobacterales|Exiguobacteraceae|Exiguobacterium|Exiguobacterium marinum	Bacteria	Bacillales	Exiguobacterium marinum DSM 16307§taxonomy:1397696	Firmicutes	Unclassified	TF-80	0	0	73	2847	0.025641	MarDB
GCF_000472625.1	/data2/marine_genomes_and_metagenomes/genomes_The_MAR_databases/prodigal_short/firmicutes/Caloramator_sp._ALD01_GCF_000472625.1.fas	§insdc.gca:GCA_000472625.1	§mmp.db:MMP02440782	Clostridia	Clostridiaceae	§gtdb:GCF_900129265.1	Caloramator	Bacteria|Firmicutes_A|Clostridia|Clostridiales|Caloramatoraceae|Caloramator_A|Caloramator_A proteoclasticus	Bacteria	Clostridiales	Caloramator sp. ALD01§taxonomy:1031288	Firmicutes	Unclassified	ALD01	0	0	116	2484	0.0466989	MarDB
GCF_900156245.1	/data2/marine_genomes_and_metagenomes/genomes_The_MAR_databases/prodigal_short/firmicutes/Bacillus_amyloliquefaciens_GD4a_GCF_900156245.1.fas	§insdc.gca:GCA_900156245.1	§mmp.db:MMP05216239	Bacilli	Bacillaceae	§gtdb:GCF_001461825.1	Bacillus	Bacteria|Firmicutes|Bacilli|Bacillales|Bacillaceae|Bacillus|Bacillus velezensis	Bacteria	Bacillales	Bacillus amyloliquefaciens§taxonomy:1390	Firmicutes	Unclassified	GD4a	0	0	106	3732	0.028403	MarDB
GCF_001438765.1	/data2/marine_genomes_and_metagenomes/genomes_The_MAR_databases/prodigal_short/firmicutes/Carnobacterium_maltaromaticum_DSM_20730_GCF_001438765.1.fas	§insdc.gca:GCA_001438765.1	§mmp.db:MMP02797807	Bacilli	Carnobacteriaceae	§gtdb:GCF_000744945.1	Carnobacterium	Bacteria|Firmicutes|Bacilli|Lactobacillales|Carnobacteriaceae|Carnobacterium|Carnobacterium maltaromaticum	Bacteria	Lactobacillales	Carnobacterium maltaromaticum§taxonomy:2751	Firmicutes	Unclassified	B270	0	0	117	3316	0.0352835	MarDB
GCF_002804065.1	/data2/marine_genomes_and_metagenomes/genomes_The_MAR_databases/prodigal_short/firmicutes/Kyrpidia_spormannii_EA-1_GCF_002804065.1.fas	§insdc.gca:GCA_002804065.1	§mmp.ref:MMP08045872	Bacilli	Alicyclobacillaceae	§gtdb:GCF_002804065.1	Kyrpidia	Bacteria|Firmicutes_K|Alicyclobacillia|Kyrpidiales|Kyrpidiaceae|Kyrpidia|Kyrpidia sp002804065	Bacteria	Bacillales	Kyrpidia spormannii§taxonomy:2055160	Firmicutes	Unclassified	EA-1	0	0	115	3278	0.0350824	MarRef
GCF_000189395.1	/data2/marine_genomes_and_metagenomes/genomes_The_MAR_databases/prodigal_short/firmicutes/Planococcus_donghaensis_MPA1U2_GCF_000189395.1.fas	§insdc.gca:GCA_000189395.2	§mmp.db:MMP02471613	Bacilli	Planococcaceae	§gtdb:GCF_000189395.1	Planococcus	Bacteria|Firmicutes|Bacilli|Bacillales_A|Planococcaceae|Planococcus_A|Planococcus_A donghaensis_B	Bacteria	Bacillales	Planococcus donghaensis MPA1U2§taxonomy:933115	Firmicutes	Planococcus donghaensis	MPA1U2	0	0	88	3243	0.0271354	MarDB
GCF_003428875.1	/data2/marine_genomes_and_metagenomes/genomes_The_MAR_databases/prodigal_short/firmicutes/Planomicrobium_okeanokoites_IFO_12536_GCF_003428875.1.fas	§insdc.gca:GCA_003428875.1	§mmp.db:MMP09708542	Bacilli	Planococcaceae	§gtdb:GCF_900176575.1	Planomicrobium	Bacteria|Firmicutes|Bacilli|Bacillales_A|Planococcaceae|Planomicrobium_A|Planomicrobium_A okeanokoites	Bacteria	Bacillales	Planomicrobium okeanokoites§taxonomy:244	Firmicutes	Planomicrobium okeanokoites	IFO 12536	0	0	71	3327	0.0213405	MarDB
GCF_002807645.1	/data2/marine_genomes_and_metagenomes/genomes_The_MAR_databases/prodigal_short/firmicutes/Virgibacillus_profundi_P3-B8_GCF_002807645.1.fas	§insdc.gca:GCA_002807645.1	§mmp.db:MMP07446448	Bacilli	Bacillaceae	§gtdb:GCF_002287375.1	Virgibacillus	Bacteria|Firmicutes|Bacilli|Bacillales|Amphibacillaceae|Virgibacillus_G|Virgibacillus_G profundi	Bacteria	Bacillales	2024556	Firmicutes	Unclassified	IO5-P3-B8	0	0	261	4447	0.0586913	MarDB
GCF_002174275.1	/data2/marine_genomes_and_metagenomes/genomes_The_MAR_databases/prodigal_short/firmicutes/Bacillus_pumilus_PE09-72_GCF_002174275.1.fas	§insdc.gca:GCA_002174275.1	§mmp.db:MMP05730644	Bacilli	Bacillaceae	§gtdb:GCF_900186955.1	Bacillus	Bacteria|Firmicutes|Bacilli|Bacillales|Bacillaceae|Bacillus|Bacillus pumilus	Bacteria	Bacillales	Bacillus pumilus§taxonomy:1408	Firmicutes	Unclassified	PE09-72	0	0	138	3755	0.036751	MarDB
GCF_900186125.1	/data2/marine_genomes_and_metagenomes/genomes_The_MAR_databases/prodigal_short/firmicutes/Listeria_goaensis_ILCC801_GCF_900186125.1.fas	§insdc.gca:GCA_900186125.1	§mmp.db:MMP104121265	Bacilli	Listeriaceae	§gtdb:GCF_900186165.1	Listeria	Bacteria|Firmicutes|Bacilli|Lactobacillales|Listeriaceae|Listeria|Listeria sp900186165	Bacteria	Bacillales	Listeria goaensis§taxonomy:1649188	Firmicutes	Unclassified	Listeria sp. ILCC801	0	0	86	2903	0.0296245	MarDB
GCF_002192415.1	/data2/marine_genomes_and_metagenomes/genomes_The_MAR_databases/prodigal_short/firmicutes/Paenibacillus_donghaensis_KCTC_13049_GCF_002192415.1.fas	§insdc.gca:GCA_002192415.1	§mmp.ref:MMP06833332	Bacilli	Paenibacillaceae	§gtdb:GCF_002192415.1	Paenibacillus	Bacteria|Firmicutes_I|Bacilli_A|Paenibacillales|Paenibacillaceae|Paenibacillus|Paenibacillus donghaensis	Bacteria	Bacillales	Paenibacillus donghaensis§taxonomy:414771	Firmicutes	Unclassified	JH8|KCTC 13049|LMG 23780	0	0	337	7787	0.0432773	MarRef
GCF_006007905.1	/data2/marine_genomes_and_metagenomes/genomes_The_MAR_databases/prodigal_short/firmicutes/Bacillus_altitudinis_HQ-51-Ba_GCF_006007905.1.fas	§insdc.gca:GCA_006007905.1	§mmp.ref:MMP11621488	Bacilli	Bacillaceae	§gtdb:GCF_000691145.1	Bacillus	Bacteria|Firmicutes|Bacilli|Bacillales|Bacillaceae|Bacillus|Bacillus	Bacteria	Bacillales	Bacillus altitudinis§taxonomy:293387	Firmicutes	Bacillus altitudinis	HQ-51-Ba	0	0	97	3781	0.0256546	MarRef
GCF_003515705.1	/data2/marine_genomes_and_metagenomes/genomes_The_MAR_databases/prodigal_short/firmicutes/Oceanobacillus_profundus_DSM_18246_GCF_003515705.1.fas	§insdc.gca:GCA_003515705.1	§mmp.db:MMP09901140	Bacilli	Bacillaceae	§gtdb:GCF_002272235.1	Oceanobacillus	Bacteria|Firmicutes|Bacilli|Bacillales|Amphibacillaceae|Oceanobacillus|Oceanobacillus sp002272235	Bacteria	Bacillales	Oceanobacillus profundus§taxonomy:372463	Firmicutes	Oceanobacillus profundus	DSM 18246|CIP 109895|KCTC 12664|M27	0	0	157	4667	0.0336405	MarDB
GCF_002042895.1	/data2/marine_genomes_and_metagenomes/genomes_The_MAR_databases/prodigal_short/firmicutes/Bacillus_altitudinis_SORB11_GCF_002042895.1.fas	§insdc.gca:GCA_002042895.1	§mmp.db:MMP05726035	Bacilli	Bacillaceae	§gtdb:GCF_000691145.1	Bacillus	Bacteria|Firmicutes|Bacilli|Bacillales|Bacillaceae|Bacillus|Bacillus altitudinis	Bacteria	Bacillales	Bacillus altitudinis§taxonomy:293387	Firmicutes	Unclassified	SORB11	0	0	116	3782	0.0306716	MarDB
GCF_003051085.1	/data2/marine_genomes_and_metagenomes/genomes_The_MAR_databases/prodigal_short/firmicutes/Trichococcus_patagoniensis_DSM_18806_GCF_003051085.1.fas	§insdc.gca:GCA_003051085.1	§mmp.db:MMP08776662	Bacilli	Carnobacteriaceae	§gtdb:GCF_003051085.1	Trichococcus	Bacteria|Firmicutes|Bacilli|Lactobacillales|Aerococcaceae|Trichococcus|Trichococcus patagoniensis	Bacteria	Lactobacillales	Trichococcus patagoniensis§taxonomy:382641	Firmicutes	Trichococcus patagoniensis	DSM 18806	0	0	96	2837	0.0338386	MarDB
GCF_001856115.1	/data2/marine_genomes_and_metagenomes/genomes_The_MAR_databases/prodigal_short/firmicutes/Planococcus_faecalis_CECT_8759_GCF_001856115.1.fas	§insdc.gca:GCA_001856115.1	§mmp.db:MMP05413080	Bacilli	Planococcaceae	§gtdb:GCF_001465835.2	Planococcus	Bacteria|Firmicutes|Bacilli|Bacillales_A|Planococcaceae|Planococcus_A|Planococcus_A kocurii	Bacteria	Bacillales	Planococcus faecalis§taxonomy:1598147	Firmicutes	Unclassified	AJ003|CECT 8759|KCTC 33580	0	0	593	4160	0.142548	MarDB
GCF_000747665.1	/data2/marine_genomes_and_metagenomes/genomes_The_MAR_databases/prodigal_short/firmicutes/Thermoanaerobacterium_saccharolyticum_NTOU1_GCF_000747665.1.fas	§insdc.gca:GCA_000747665.1	§mmp.db:MMP00018622	Clostridia	Thermoanaerobacterales Family III. Incertae Sedis	§gtdb:GCF_000747665.1	Thermoanaerobacterium	Bacteria|Firmicutes_A|Thermoanaerobacteria|Thermoanaerobacterales|Thermoanaerobacteraceae|Thermoanaerobacterium|Thermoanaerobacterium saccharolyticum_A	Bacteria	Thermoanaerobacterales	Thermoanaerobacterium saccharolyticum§taxonomy:28896	Firmicutes	Unclassified	NTOU1	0	0	373	3127	0.119284	MarDB
GCF_000153365.1	/data2/marine_genomes_and_metagenomes/genomes_The_MAR_databases/prodigal_short/firmicutes/Bacillus_sp._NRRL_B-14911_GCF_000153365.1.fas	§insdc.gca:GCA_000153365.1	§mmp.db:MMP00622969	Bacilli	Bacillaceae	§gtdb:GCF_000473245.1	Bacillus	Bacteria|Firmicutes|Bacilli|Bacillales|Bacillaceae_A|Bacillus_AB|Bacillus_AB infantis	Bacteria	Bacillales	Bacillus sp. NRRL B-14911§taxonomy:313627	Firmicutes	Unclassified	NRRL B-14911	0	0	227	5134	0.044215	MarDB
GCF_003060825.1	/data2/marine_genomes_and_metagenomes/genomes_The_MAR_databases/prodigal_short/firmicutes/Paenibacillus_sp._CAA11_GCF_003060825.1.fas	§insdc.gca:GCA_003060825.1	§mmp.ref:MMP08934269	Bacilli	Paenibacillaceae	§gtdb:GCF_003060825.1	Paenibacillus	Bacteria|Firmicutes_I|Bacilli_A|Paenibacillales|Paenibacillaceae|Paenibacillus_R|Paenibacillus_R sp003060825	Bacteria	Bacillales	Paenibacillus sp. CAA11§taxonomy:1532905	Firmicutes	Unclassified	CAA11	0	0	104	4492	0.0231523	MarRef
GCF_002763455.1	/data2/marine_genomes_and_metagenomes/genomes_The_MAR_databases/prodigal_short/firmicutes/Lentibacillus_sediminis_0W14_GCF_002763455.1.fas	§insdc.gca:GCA_002763455.1	§mmp.db:MMP07249126	Bacilli	Bacillaceae	§gtdb:GCF_002763455.1	Lentibacillus	Bacteria|Firmicutes|Bacilli|Bacillales|Amphibacillaceae|Lentibacillus_A|Lentibacillus_A sediminis	Bacteria	Bacillales	Lentibacillus sediminis§taxonomy:1940529	Firmicutes	Unclassified	0W14	0	0	90	3688	0.0244035	MarDB
GCF_900186145.1	/data2/marine_genomes_and_metagenomes/genomes_The_MAR_databases/prodigal_short/firmicutes/Listeria_sp._ILCC806_GCF_900186145.1.fas	§insdc.gca:GCA_900186145.1	§mmp.db:MMP104121267	Bacilli	Listeriaceae	§gtdb:GCF_900186165.1	Listeria	Bacteria|Firmicutes|Bacilli|Lactobacillales|Listeriaceae|Listeria|Listeria sp900186165	Bacteria	Bacillales	Listeria goaensis§taxonomy:1649188	Firmicutes	Unclassified	Listeria sp. ILCC806	0	0	77	2542	0.0302911	MarDB
GCF_001884045.1	/data2/marine_genomes_and_metagenomes/genomes_The_MAR_databases/prodigal_short/firmicutes/Bacillus_mobilis_0711P9-1_GCF_001884045.1.fas	§insdc.gca:GCA_001884045.1	§mmp.db:MMP05231544	Bacilli	Bacillaceae	§gtdb:GCF_900176845.1	Bacillus	Bacteria|Firmicutes|Bacilli|Bacillales|Bacillaceae_G|Bacillus_A|Bacillus_A cereus_AX	Bacteria	Bacillales	857402	Firmicutes	Unclassified	0711P9-1|MCCC 1A05942	0	0	244	5762	0.0423464	MarDB
GCF_002747285.1	/data2/marine_genomes_and_metagenomes/genomes_The_MAR_databases/prodigal_short/firmicutes/Bacillus_velezensis_B5_GCF_002747285.1.fas	§insdc.gca:GCA_002747285.1	§mmp.db:MMP07514152	Bacilli	Bacillaceae	§gtdb:GCF_001461825.1	Bacillus	Bacteria|Firmicutes|Bacilli|Bacillales|Bacillaceae|Bacillus|Bacillus velezensis	Bacteria	Bacillales	Bacillus velezensis§taxonomy:492670	Firmicutes	Unclassified	B5	0	0	103	3834	0.0268649	MarDB
GCF_000425705.1	/data2/marine_genomes_and_metagenomes/genomes_The_MAR_databases/prodigal_short/firmicutes/Halobacillus_kuroshimensis_DSM_18393_GCF_000425705.1.fas	§insdc.gca:GCA_000425705.1	§mmp.db:MMP02441195	Bacilli	Bacillaceae	§gtdb:GCF_000425705.1	Halobacillus	Bacteria|Firmicutes|Bacilli|Bacillales|Halobacillaceae|Halobacillus|Halobacillus kuroshimensis	Bacteria	Bacillales	Halobacillus kuroshimensis DSM 18393§taxonomy:1121938	Firmicutes	Halobacillus kuroshimensis	JS-Hb7	0	0	59	3950	0.0149367	MarDB
GCF_900096925.1	/data2/marine_genomes_and_metagenomes/genomes_The_MAR_databases/prodigal_short/firmicutes/Exiguobacterium_enclense_NIO-1109_GCF_900096925.1.fas	§insdc.gca:GCA_900096925.1	§mmp.db:MMP05216342	Bacilli	Bacilli (family)	§gtdb:GCF_001939065.1	Exiguobacterium	Bacteria|Firmicutes|Bacilli|Exiguobacterales|Exiguobacteraceae|Exiguobacterium_A|Exiguobacterium_A indicum	Bacteria	Bacillales	Exiguobacterium enclense§taxonomy:1017277	Firmicutes	Unclassified	NIO-1109	0	0	113	3349	0.0337414	MarDB
GCF_000184705.1	/data2/marine_genomes_and_metagenomes/genomes_The_MAR_databases/prodigal_short/firmicutes/Thermaerobacter_marianensis_DSM_12885_GCF_000184705.1.fas	§insdc.gca:GCA_000184705.1	§mmp.ref:MMP00713570	Clostridia	Clostridiales Family XVII. Incertae Sedis	§gtdb:GCF_000184705.1	Thermaerobacter	Bacteria|Firmicutes_E|Thermaerobacteria|Thermaerobacterales|Thermaerobacteraceae|Thermaerobacter|Thermaerobacter marianensis	Bacteria	Clostridiales	Thermaerobacter marianensis DSM 12885§taxonomy:644966	Firmicutes	Thermaerobacter marianensis	7p75a|DSM 12885|ATCC 700841|JCM 10246	0	0	77	2383	0.0323122	MarRef
GCF_000423245.1	/data2/marine_genomes_and_metagenomes/genomes_The_MAR_databases/prodigal_short/firmicutes/Ligilactobacillus_ceti_DSM_22408_GCF_000423245.1.fas	§insdc.gca:GCA_000423245.1	§mmp.db:MMP02441169	Bacilli	Lactobacillaceae	§gtdb:GCF_000423245.1	Lactobacillus	Bacteria|Firmicutes|Bacilli|Lactobacillales|Lactobacillaceae|Lactobacillus_B|Lactobacillus_B ceti	Bacteria	Lactobacillales	Lactobacillus ceti DSM 22408§taxonomy:1122146	Firmicutes	Lactobacillus ceti	142-2	0	0	65	1282	0.050702	MarDB
GCF_003815035.1	/data2/marine_genomes_and_metagenomes/genomes_The_MAR_databases/prodigal_short/firmicutes/Abyssicoccus_albus_DSM_29158_GCF_003815035.1.fas	§insdc.gca:GCA_003815035.1	§mmp.db:MMP10362902	Bacilli	Staphylococcaceae	§gtdb:GCF_001989575.1	Abyssicoccus	Bacteria|Firmicutes|Bacilli|Staphylococcales|Auricoccaceae|Auricoccus|Auricoccus indicus	Bacteria	Bacillales	Abyssicoccus albus§taxonomy:1817405	Firmicutes	Abyssicoccus albus	DSM 29158	0	0	91	1794	0.0507246	MarDB
GCF_002441695.1	/data2/marine_genomes_and_metagenomes/genomes_The_MAR_databases/prodigal_short/firmicutes/Lactococcus_piscium_DSM_6634_GCF_002441695.1.fas	§insdc.gca:GCA_002441695.1	§mmp.db:MMP03267152	Bacilli	Streptococcaceae	§gtdb:GCF_002441695.1	Lactococcus	Bacteria|Firmicutes|Bacilli|Lactobacillales|Streptococcaceae|Lactococcus|Lactococcus piscium	Bacteria	Lactobacillales	Lactococcus piscium§taxonomy:1364	Firmicutes	Unclassified	DSM 6634	0	0	399	2397	0.166458	MarDB
GCF_900186195.1	/data2/marine_genomes_and_metagenomes/genomes_The_MAR_databases/prodigal_short/firmicutes/Listeria_sp._ILCC810_GCF_900186195.1.fas	§insdc.gca:GCA_900186195.1	§mmp.db:MMP104121268	Bacilli	Listeriaceae	§gtdb:GCF_900186165.1	Listeria	Bacteria|Firmicutes|Bacilli|Lactobacillales|Listeriaceae|Listeria|Listeria sp900186165	Bacteria	Bacillales	Listeria goaensis§taxonomy:1649188	Firmicutes	Unclassified	Listeria sp. ILCC810	0	0	87	2806	0.031005	MarDB
GCF_900142245.1	/data2/marine_genomes_and_metagenomes/genomes_The_MAR_databases/prodigal_short/firmicutes/Paramaledivibacter_caminithermalis_DSM_15212_GCF_900142245.1.fas	§insdc.gca:GCA_900142245.1	§mmp.db:MMP02745912	Clostridia	Clostridiaceae	§gtdb:GCF_900142245.1	Paramaledivibacter	Bacteria|Firmicutes_A|Clostridia|Peptostreptococcales|Caminicellaceae|Paramaledivibacter|Paramaledivibacter caminithermalis	Bacteria	Clostridiales	Paramaledivibacter caminithermalis DSM 15212§taxonomy:1121301	Firmicutes	Paramaledivibacter caminithermalis	DViRD3|DSM 15212|CIP 107654	0	0	307	3896	0.0787988	MarDB
GCF_007197795.1	/data2/marine_genomes_and_metagenomes/genomes_The_MAR_databases/prodigal_short/firmicutes/Geobacillus_sp._E263_GCF_007197795.1.fas	§insdc.gca:GCA_007197795.1	§mmp.ref:MMP12252226	Bacilli	Bacillaceae	§gtdb:GCF_002217735.1	Geobacillus	Bacteria|Firmicutes|Bacilli|Bacillales|Anoxybacillaceae|Parageobacillus|Parageobacillus	Bacteria	Bacillales	Geobacillus sp. E263§taxonomy:391290	Firmicutes	Geobacillus sp. E263	E263	0	0	135	3484	0.0387486	MarRef
GCF_001884215.1	/data2/marine_genomes_and_metagenomes/genomes_The_MAR_databases/prodigal_short/firmicutes/Bacillus_sp._P14-1_GCF_001884215.1.fas	§insdc.gca:GCA_001884215.1	§mmp.db:MMP05231661	Bacilli	Bacillaceae	§gtdb:GCF_002214725.1	Bacillus	Bacteria|Firmicutes|Bacilli|Bacillales|Bacillaceae_G|Bacillus_A|Bacillus_A cereus_AD	Bacteria	Bacillales	Bacillus sp. P14-1§taxonomy:1866317	Firmicutes	Unclassified	P14-1	0	0	187	5512	0.033926	MarDB
GCF_001857945.1	/data2/marine_genomes_and_metagenomes/genomes_The_MAR_databases/prodigal_short/firmicutes/Paenibacillus_crassostreae_LPB0068_GCF_001857945.1.fas	§insdc.gca:GCA_001857945.1	§mmp.ref:MMP05933025	Bacilli	Paenibacillaceae	§gtdb:GCF_001857945.1	Paenibacillus	Bacteria|Firmicutes_I|Bacilli_A|Paenibacillales|Paenibacillaceae|Paenibacillus|Paenibacillus crassostreae	Bacteria	Bacillales	Paenibacillus crassostreae§taxonomy:1763538	Firmicutes	Unclassified	LPB0068|KACC 18694|JCM 31183	0	0	168	4464	0.0376344	MarRef
GCF_000746825.1	/data2/marine_genomes_and_metagenomes/genomes_The_MAR_databases/prodigal_short/firmicutes/Carnobacterium_inhibens_subsp._inhibens_DSM_13024_K1_GCF_000746825.1.fas	§insdc.gca:GCA_000746825.1	§mmp.db:MMP02787092	Bacilli	Carnobacteriaceae	§gtdb:GCF_000746825.1	Carnobacterium	Bacteria|Firmicutes|Bacilli|Lactobacillales|Carnobacteriaceae|Carnobacterium_A|Carnobacterium_A inhibens	Bacteria	Lactobacillales	Carnobacterium inhibens subsp. inhibens DSM 13024§taxonomy:1449339	Firmicutes	Carnobacterium inhibens	K1	0	0	100	2643	0.0378358	MarDB
GCF_003369575.1	/data2/marine_genomes_and_metagenomes/genomes_The_MAR_databases/prodigal_short/firmicutes/Oceanobacillus_arenosus_CAU_1183_GCF_003369575.1.fas	§insdc.gca:GCA_003369575.1	§mmp.db:MMP08100074	Bacilli	Bacillaceae	0	Oceanobacillus	Bacteria|Firmicutes|Bacilli|Bacillales|Amphibacillaceae|Oceanobacillus	Bacteria	Bacillales	Oceanobacillus arenosus§taxonomy:1229153	Firmicutes	Oceanobacillus arenosus	CAU 1183	0	0	138	4007	0.0344397	MarDB
GCF_000156275.2	/data2/marine_genomes_and_metagenomes/genomes_The_MAR_databases/prodigal_short/firmicutes/Caldanaerobacter_subterraneus_subsp._pacificus_DSM_12653_GCF_000156275.2.fas	§insdc.gca:GCA_000156275.2	§mmp.db:MMP02436270	Clostridia	Thermoanaerobacteraceae	§gtdb:GCF_000007085.1	Caldanaerobacter	Bacteria|Firmicutes_A|Thermoanaerobacteria|Thermoanaerobacterales|Thermoanaerobacteraceae|Caldanaerobacter|Caldanaerobacter subterraneus	Bacteria	Thermoanaerobacterales	Caldanaerobacter subterraneus subsp. pacificus DSM 12653§taxonomy:391606	Firmicutes	Caldanaerobacter subterraneus	DSM 12653	0	0	252	2492	0.101124	MarDB
GCF_000785045.1	/data2/marine_genomes_and_metagenomes/genomes_The_MAR_databases/prodigal_short/firmicutes/Priestia_aryabhattai_GZ03_GCF_000785045.1.fas	§insdc.gca:GCA_000785045.1	§mmp.db:MMP02909700	Bacilli	Bacillaceae	§gtdb:GCF_000956595.1	Bacillus	Bacteria|Firmicutes|Bacilli|Bacillales|Bacillaceae_H|Bacillus_C|Bacillus_C aryabhattai	Bacteria	Bacillales	Priestia aryabhattai§taxonomy:412384	Firmicutes	Unclassified	GZ03	0	0	141	5261	0.026801	MarDB
GCF_900106775.1	/data2/marine_genomes_and_metagenomes/genomes_The_MAR_databases/prodigal_short/firmicutes/Marininema_mesophilum_DSM_45610_GCF_900106775.1.fas	§insdc.gca:GCA_900106775.1	§mmp.db:MMP05444487	Bacilli	Thermoactinomycetaceae	§gtdb:GCF_900106775.1	Marininema	Bacteria|Firmicutes_I|Bacilli_A|Thermoactinomycetales|Thermoactinomycetaceae|Marininema|Marininema mesophilum	Bacteria	Bacillales	Marininema mesophilum§taxonomy:1048340	Firmicutes	Unclassified	SCSIO 10219|DSM 45610|CCTCC AA 2011006	0	0	101	3160	0.031962	MarDB
GCF_001885765.1	/data2/marine_genomes_and_metagenomes/genomes_The_MAR_databases/prodigal_short/firmicutes/Enterococcus_aquimarinus_DSM_17690_GCF_001885765.1.fas	§insdc.gca:GCA_001885765.1	§mmp.db:MMP03267160	Bacilli	Enterococcaceae	§gtdb:GCF_001885765.1	Enterococcus	Bacteria|Firmicutes|Bacilli|Lactobacillales|Enterococcaceae|Enterococcus_I|Enterococcus_I aquimarinus	Bacteria	Lactobacillales	Enterococcus aquimarinus§taxonomy:328396	Firmicutes	Unclassified	API 8407116|DSM 17690|LMG 16607|CCM 7283|CCUG 51308|CIP 108926	0	0	72	2337	0.0308087	MarDB
GCF_001466305.1	/data2/marine_genomes_and_metagenomes/genomes_The_MAR_databases/prodigal_short/firmicutes/Defluviitalea_phaphyphila_Alg1_GCF_001466305.1.fas	§insdc.gca:GCA_001466305.1	§mmp.db:MMP03165200	Clostridia	Defluviitaleaceae	§gtdb:GCF_001466305.1	Defluviitalea	Bacteria|Firmicutes_A|Clostridia|Lachnospirales|Defluviitaleaceae|Defluviitalea|Defluviitalea phaphyphila	Bacteria	Clostridiales	Defluviitalea phaphyphila§taxonomy:1473580	Firmicutes	Unclassified	Alg1	0	0	152	2459	0.0618137	MarDB
GCF_000526675.1	/data2/marine_genomes_and_metagenomes/genomes_The_MAR_databases/prodigal_short/firmicutes/Atopobacter_phocae_ATCC_BAA-285_GCF_000526675.1.fas	§insdc.gca:GCA_000526675.1	§mmp.db:MMP02584963	Bacilli	Carnobacteriaceae	§gtdb:GCF_000526675.1	Atopobacter	Bacteria|Firmicutes|Bacilli|Lactobacillales|Aerococcaceae|Atopobacter|Atopobacter phocae	Bacteria	Lactobacillales	Atopobacter phocae ATCC BAA-285§taxonomy:1336234	Firmicutes	Atopobacter phocae	ATCC BAA-285	0	0	108	1612	0.0669975	MarDB
GCF_900186185.1	/data2/marine_genomes_and_metagenomes/genomes_The_MAR_databases/prodigal_short/firmicutes/Listeria_sp._ILCC797_GCF_900186185.1.fas	§insdc.gca:GCA_900186185.1	§mmp.db:MMP104121264	Bacilli	Listeriaceae	§gtdb:GCF_900186165.1	Listeria	Bacteria|Firmicutes|Bacilli|Lactobacillales|Listeriaceae|Listeria|Listeria sp900186165	Bacteria	Bacillales	Listeria goaensis§taxonomy:1649188	Firmicutes	Unclassified	Listeria sp. ILCC797	0	0	77	2733	0.0281742	MarDB
GCF_002019595.1	/data2/marine_genomes_and_metagenomes/genomes_The_MAR_databases/prodigal_short/firmicutes/Priestia_abyssalis_DSM_25875_GCF_002019595.1.fas	§insdc.gca:GCA_002019595.1	§mmp.db:MMP05934486	Bacilli	Bacillaceae	§gtdb:GCF_002019595.1	Bacillus	Bacteria|Firmicutes|Bacilli|Bacillales|Bacillaceae_H|Bacillus_BA|Bacillus_BA abyssalis	Bacteria	Bacillales	Priestia abyssalis§taxonomy:1221450	Firmicutes	Unclassified	SCSIO 15042|DSM 25875|CCTCC AB 2012074|NBRC 109102	0	0	161	5511	0.0292143	MarDB
GCF_003865195.2	/data2/marine_genomes_and_metagenomes/genomes_The_MAR_databases/prodigal_short/firmicutes/Parageobacillus_thermoglucosidasius_TG4_GCF_003865195.2.fas	§insdc.gca:GCA_003865195.1	§mmp.db:MMP00150856	Bacilli	Bacillaceae	§gtdb:GCF_001295365.1	Parageobacillus	Bacteria|Firmicutes|Bacilli|Bacillales|Anoxybacillaceae|Parageobacillus|Parageobacillus thermoglucosidasius	Bacteria	Bacillales	Parageobacillus thermoglucosidasius§taxonomy:1426	Firmicutes	Parageobacillus thermoglucosidasius	TG4	0	0	140	3954	0.0354072	MarDB
GCF_004367585.1	/data2/marine_genomes_and_metagenomes/genomes_The_MAR_databases/prodigal_short/firmicutes/Paenisporosarcina_antarctica_CGMCC_1.6503_GCF_004367585.1.fas	§insdc.gca:GCA_004367585.1	§mmp.ref:MMP11164061	Bacilli	Planococcaceae	§gtdb:GCF_000297555.1	Paenisporosarcina	Bacteria|Firmicutes|Bacilli|Bacillales_A|Planococcaceae|Paenisporosarcina_A|Paenisporosarcina_A	Bacteria	Bacillales	Paenisporosarcina antarctica§taxonomy:417367	Firmicutes	Paenisporosarcina antarctica	CGMCC 1.6503	0	0	132	3732	0.0353698	MarRef
GCF_001558705.1	/data2/marine_genomes_and_metagenomes/genomes_The_MAR_databases/prodigal_short/firmicutes/Bacillus_amyloliquefaciens_11B91_GCF_001558705.1.fas	§insdc.gca:GCA_001558705.1	§mmp.db:MMP04296795	Bacilli	Bacillaceae	§gtdb:GCF_001461825.1	Bacillus	Bacteria|Firmicutes|Bacilli|Bacillales|Bacillaceae|Bacillus|Bacillus velezensis	Bacteria	Bacillales	Bacillus amyloliquefaciens§taxonomy:1390	Firmicutes	Unclassified	11B91	0	0	114	3905	0.0291933	MarDB
GCF_000195575.1	/data2/marine_genomes_and_metagenomes/genomes_The_MAR_databases/prodigal_short/firmicutes/Carnobacterium_sp._17-4_GCF_000195575.1.fas	§insdc.gca:GCA_000195575.1	§mmp.ref:MMP02603266	Bacilli	Carnobacteriaceae	§gtdb:GCF_000195575.1	Carnobacterium	Bacteria|Firmicutes|Bacilli|Lactobacillales|Carnobacteriaceae|Carnobacterium_A|Carnobacterium_A sp000195575	Bacteria	Lactobacillales	Carnobacterium sp. 17-4§taxonomy:208596	Firmicutes	Carnobacterium sp. 17-4	44668	0	0	77	2516	0.0306041	MarRef
GCF_001888525.1	/data2/marine_genomes_and_metagenomes/genomes_The_MAR_databases/prodigal_short/firmicutes/Lactiplantibacillus_plantarum_A3_GCF_001888525.1.fas	§insdc.gca:GCA_001888525.1	§mmp.db:MMP03654356	Bacilli	Lactobacillaceae	§gtdb:GCA_000615325.1	Lactobacillus	Bacteria|Firmicutes|Bacilli|Lactobacillales|Lactobacillaceae|Lactobacillus_F|Lactobacillus_F plantarum	Bacteria	Lactobacillales	Lactiplantibacillus plantarum§taxonomy:1590	Firmicutes	Unclassified	A3	0	0	160	3234	0.0494743	MarDB
GCA_002695715.1	/data2/marine_genomes_and_metagenomes/genomes_The_MAR_databases/prodigal_short/MAR/Magnetovibrio_sp._EAC64_GCA_002695715.1.fas	§insdc.gca:GCA_002695715.1	§mmp.db:MMP07619308	Alphaproteobacteria	Rhodospirillaceae	§gtdb:GCA_002706405.1	Magnetovibrio	Bacteria|Proteobacteria|Alphaproteobacteria|Rhodospirillales_A|UBA1479|UBA1479|UBA1479 sp002706405	Bacteria	Rhodospirillales	Magnetovibrio sp.§taxonomy:2024836	Proteobacteria	Unclassified	EAC-64	0	0	565	2927	0.19303	MarDB
GCA_002686225.1	/data2/marine_genomes_and_metagenomes/genomes_The_MAR_databases/prodigal_short/MAR/Alteromonas_sp._ARS20_GCA_002686225.1.fas	§insdc.gca:GCA_002686225.1	§mmp.db:MMP07618336	Gammaproteobacteria	Alteromonadaceae	§gtdb:GCF_000730385.1	Alteromonas	Bacteria|Proteobacteria|Gammaproteobacteria|Enterobacterales|Alteromonadaceae|Alteromonas|Alteromonas australica	Bacteria	Alteromonadales	Alteromonas sp.§taxonomy:232	Proteobacteria	Unclassified	ARS-20	0	0	638	3559	0.179264	MarDB
GCA_003477165.1	/data2/marine_genomes_and_metagenomes/genomes_The_MAR_databases/prodigal_short/MAR/Glaciecola_sp._UBA12246_GCA_003477165.1.fas	§insdc.gca:GCA_003477165.1	§mmp.db:MMP08018069	Gammaproteobacteria	Alteromonadaceae	§gtdb:GCA_002292215.1	Glaciecola	Bacteria|Proteobacteria|Gammaproteobacteria|Enterobacterales|Alteromonadaceae|Glaciecola|Glaciecola sp002292215	Bacteria	Alteromonadales	Glaciecola sp.§taxonomy:1905676	Proteobacteria	Glaciecola sp.	UBA12246	0	0	711	2591	0.274411	MarDB
GCA_002705325.1	/data2/marine_genomes_and_metagenomes/genomes_The_MAR_databases/prodigal_short/MAR/Gammaproteobacteria_bacterium_MED814_GCA_002705325.1.fas	§insdc.gca:GCA_002705325.1	§mmp.db:MMP07620428	Gammaproteobacteria	Unclassified	§gtdb:GCA_002705325.1	Unclassified	Bacteria|Proteobacteria|Gammaproteobacteria|Pseudomonadales|Litoricolaceae|Litoricola|Litoricola sp002705325	Bacteria	Unclassified	Gammaproteobacteria bacterium§taxonomy:1913989	Proteobacteria	Unclassified	MED-814	0	0	363	2053	0.176814	MarDB
GCA_002358375.1	/data2/marine_genomes_and_metagenomes/genomes_The_MAR_databases/prodigal_short/MAR/Proteobacteria_bacterium_UBA3412_GCA_002358375.1.fas	§insdc.gca:GCA_002358375.1	§mmp.db:MMP06453779	Unclassified	Unclassified	§gtdb:GCA_002358345.1	Unclassified	Bacteria|Proteobacteria|Gammaproteobacteria|SAR86|D2472|D2472|D2472 sp002358345	Bacteria	Unclassified	Proteobacteria bacterium UBA3412§taxonomy:1948166	Proteobacteria	Unclassified	UBA3412	0	0	754	1338	0.563528	MarDB
GCA_002938175.1	/data2/marine_genomes_and_metagenomes/genomes_The_MAR_databases/prodigal_short/MAR/Alphaproteobacteria_bacterium_MarineAlpha5_Bin10_GCA_002938175.1.fas	§insdc.gca:GCA_002938175.1	§mmp.db:MMP07286212	Alphaproteobacteria	Unclassified	§gtdb:GCA_002717485.1	Unclassified	Bacteria|Proteobacteria|Alphaproteobacteria|HIMB59|GCA-002718135|GCA-2717485|GCA-2717485 sp002717485	Bacteria	Unclassified	Alphaproteobacteria bacterium MarineAlpha5_Bin10§taxonomy:2013085	Proteobacteria	Alphaproteobacteria bacterium MarineAlpha5_Bin10	MarineAlpha5_Bin10	0	0	146	1008	0.144841	MarDB
GCA_002727755.1	/data2/marine_genomes_and_metagenomes/genomes_The_MAR_databases/prodigal_short/MAR/Gammaproteobacteria_bacterium_RS466_GCA_002727755.1.fas	§insdc.gca:GCA_002727755.1	§mmp.db:MMP07620370	Gammaproteobacteria	Unclassified	§gtdb:GCA_002727755.1	Unclassified	Bacteria|Proteobacteria|Gammaproteobacteria|Pseudomonadales|Pseudohongiellaceae|UBA9145|UBA9145 sp002727755	Bacteria	Unclassified	Gammaproteobacteria bacterium§taxonomy:1913989	Proteobacteria	Unclassified	RS-466	0	0	582	1902	0.305994	MarDB
GCA_003545125.1	/data2/marine_genomes_and_metagenomes/genomes_The_MAR_databases/prodigal_short/MAR/Rhodobacteraceae_bacterium_UBA9292_GCA_003545125.1.fas	§insdc.gca:GCA_003545125.1	§mmp.db:MMP08020339	Alphaproteobacteria	Rhodobacteraceae	0	Unclassified	Bacteria|Proteobacteria|Alphaproteobacteria|Rhodobacterales|Rhodobacteraceae|HL-12	Bacteria	Rhodobacterales	Rhodobacteraceae bacterium§taxonomy:1904441	Proteobacteria	Rhodobacteraceae bacterium	UBA9292	0	0	1041	4508	0.230923	MarDB
GCA_002480495.1	/data2/marine_genomes_and_metagenomes/genomes_The_MAR_databases/prodigal_short/MAR/Rhodobiaceae_bacterium_UBA7804_GCA_002480495.1.fas	§insdc.gca:GCA_002480495.1	§mmp.db:MMP06457158	Alphaproteobacteria	Rhodobiaceae	§gtdb:GCA_002480495.1	Unclassified	Bacteria|Proteobacteria|Alphaproteobacteria|Parvibaculales|Parvibaculaceae|Parvibaculum|Parvibaculum sp002480495	Bacteria	Rhizobiales	Rhodobiaceae bacterium UBA7804§taxonomy:1952834	Proteobacteria	Unclassified	UBA7804	0	0	372	3615	0.102905	MarDB
GCA_002709525.1	/data2/marine_genomes_and_metagenomes/genomes_The_MAR_databases/prodigal_short/MAR/Magnetovibrio_sp._SP115_GCA_002709525.1.fas	§insdc.gca:GCA_002709525.1	§mmp.db:MMP07619311	Alphaproteobacteria	Rhodospirillaceae	§gtdb:GCA_002709525.1	Magnetovibrio	Bacteria|Proteobacteria|Alphaproteobacteria|Rhodospirillales_A|UBA3470|UBA3470|UBA3470 sp002709525	Bacteria	Rhodospirillales	Magnetovibrio sp.§taxonomy:2024836	Proteobacteria	Unclassified	SP-115	0	0	579	2986	0.193905	MarDB
GCA_002471845.1	/data2/marine_genomes_and_metagenomes/genomes_The_MAR_databases/prodigal_short/MAR/Candidatus_Marinimicrobia_bacterium_UBA7301_GCA_002471845.1.fas	§insdc.gca:GCA_002471845.1	§mmp.db:MMP06455074	Unclassified	Unclassified	§gtdb:GCA_002471845.1	Unclassified	Bacteria|Marinisomatota|Marinisomatia|Marinisomatales|TCS55|TCS55|TCS55 sp002471845	Bacteria	Unclassified	Candidatus Marinimicrobia bacterium UBA7301§taxonomy:1953255	Unclassified	Unclassified	UBA7301	0	0	867	1736	0.499424	MarDB
GCA_003232385.1	/data2/marine_genomes_and_metagenomes/genomes_The_MAR_databases/prodigal_short/MAR/bacterium_SZUA-79_GCA_003232385.1.fas	§insdc.gca:GCA_003232385.1	§mmp.db:MMP09240063	Unclassified	Unclassified	§gtdb:GCA_003232385.1	Unclassified	Bacteria|SZUA-79|SZUA-79|SZUA-79|SZUA-79|SZUA-79|SZUA-79 sp003232385	Bacteria	Unclassified	Bacterium§taxonomy:1869227	Unclassified	bacterium	SZUA-79	0	0	620	1512	0.410053	MarDB
GCA_002702225.1	/data2/marine_genomes_and_metagenomes/genomes_The_MAR_databases/prodigal_short/MAR/Candidatus_Marinimicrobia_bacterium_NAT274_GCA_002702225.1.fas	§insdc.gca:GCA_002702225.1	§mmp.db:MMP07619361	Unclassified	Unclassified	§gtdb:GCA_002702225.1	Unclassified	Bacteria|Marinisomatota|Marinisomatia|Marinisomatales|TCS55|TMED108|TMED108 sp002702225	Bacteria	Unclassified	Candidatus Marinimicrobia bacterium§taxonomy:2026760	Unclassified	Unclassified	NAT-274	0	0	883	1559	0.566389	MarDB
GCA_003251035.1	/data2/marine_genomes_and_metagenomes/genomes_The_MAR_databases/prodigal_short/MAR/Desulfobacteraceae_bacterium_SZUA-581_GCA_003251035.1.fas	§insdc.gca:GCA_003251035.1	§mmp.db:MMP09288129	Deltaproteobacteria	Desulfobacteraceae	0	Unclassified	Bacteria|Desulfobacterota|Desulfobacteria|Desulfobacterales|Desulfosarcinaceae	Bacteria	Desulfobacterales	Desulfobacteraceae bacterium§taxonomy:2049433	Proteobacteria	Desulfobacteraceae bacterium	SZUA-581	0	0	1148	3360	0.341667	MarDB
GCA_002432655.1	/data2/marine_genomes_and_metagenomes/genomes_The_MAR_databases/prodigal_short/MAR/Thiotrichaceae_bacterium_UBA5859_GCA_002432655.1.fas	§insdc.gca:GCA_002432655.1	§mmp.db:MMP06450534	Gammaproteobacteria	Thiotrichaceae	§gtdb:GCA_002432655.1	Unclassified	Bacteria|Proteobacteria|Gammaproteobacteria|UBA5859|UBA5859|UBA5859|UBA5859 sp002432655	Bacteria	Thiotrichales	Thiotrichaceae bacterium UBA5859§taxonomy:1953015	Proteobacteria	Unclassified	UBA5859	0	0	796	2783	0.286022	MarDB
GCA_002709395.1	/data2/marine_genomes_and_metagenomes/genomes_The_MAR_databases/prodigal_short/MAR/Roseibacillus_sp._SP127_GCA_002709395.1.fas	§insdc.gca:GCA_002709395.1	§mmp.db:MMP07620047	Verrucomicrobiae	Verrucomicrobiaceae	§gtdb:GCA_002709395.1	Roseibacillus	Bacteria|Verrucomicrobiota|Verrucomicrobiae|Verrucomicrobiales|Akkermansiaceae|Roseibacillus|Roseibacillus sp002709395	Bacteria	Verrucomicrobiales	Roseibacillus sp.§taxonomy:2024856	Verrucomicrobia	Unclassified	SP-127	0	0	2789	2789	1	MarDB
GCA_003646405.1	/data2/marine_genomes_and_metagenomes/genomes_The_MAR_databases/prodigal_short/MAR/Gammaproteobacteria_bacterium_B37_G6_GCA_003646405.1.fas	§insdc.gca:GCA_003646405.1	§mmp.db:MMP09215154	Gammaproteobacteria	Unclassified	0	Unclassified	Bacteria|Proteobacteria|Gammaproteobacteria|Pseudomonadales|Halieaceae|Halioglobus	Bacteria	Unclassified	Gammaproteobacteria bacterium§taxonomy:1913989	Proteobacteria	Gammaproteobacteria bacterium	B37_G6	0	0	729	2890	0.252249	MarDB
GCA_002705245.1	/data2/marine_genomes_and_metagenomes/genomes_The_MAR_databases/prodigal_short/MAR/Dehalococcoidia_bacterium_NAT199_GCA_002705245.1.fas	§insdc.gca:GCA_002705245.1	§mmp.db:MMP07618628	Dehalococcoidia	Unclassified	0	Unclassified	Bacteria|Chloroflexota|Dehalococcoidia|SAR202|UBA2962|UBA2962	Bacteria	Unclassified	Dehalococcoidia bacterium§taxonomy:2026734	Chloroflexi	Unclassified	NAT-199	0	0	401	1198	0.334725	MarDB
GCA_002346665.1	/data2/marine_genomes_and_metagenomes/genomes_The_MAR_databases/prodigal_short/MAR/Gemmatimonadales_bacterium_UBA2988_GCA_002346665.1.fas	§insdc.gca:GCA_002346665.1	§mmp.db:MMP06452558	Gemmatimonadetes	Unclassified	§gtdb:GCA_002346665.1	Unclassified	Bacteria|Gemmatimonadota|Gemmatimonadetes|SG8-23|UBA6960|UBA2988|UBA2988 sp002346665	Bacteria	Gemmatimonadales	Gemmatimonadales bacterium UBA2988§taxonomy:1951110	Gemmatimonadetes	Unclassified	UBA2988	0	0	504	1904	0.264706	MarDB
GCA_000828755.1	/data2/marine_genomes_and_metagenomes/genomes_The_MAR_databases/prodigal_short/MAR/Pseudomonas_sp._MT-1_GCA_000828755.1.fas	§insdc.gca:GCA_000828755.1	§mmp.ref:MMP00017418	Gammaproteobacteria	Pseudomonadaceae	§gtdb:GCA_003293815.1	Pseudomonas	Bacteria|Proteobacteria|Gammaproteobacteria|Pseudomonadales|Pseudomonadaceae|Pseudomonas_A|Pseudomonas_A zhaodongensis	Bacteria	Pseudomonadales	Pseudomonas sp. MT-1§taxonomy:150396	Proteobacteria	Pseudomonas sp. MT-1	MT-1	0	0	561	4530	0.123841	MarRef
GCA_000495595.3	/data2/marine_genomes_and_metagenomes/genomes_The_MAR_databases/prodigal_short/MAR/Desulfofustis_sp._PB-SRB1_PB-SRB1-LS01-2010a_GCA_000495595.3.fas	#N/A	#N/A	Deltaproteobacteria	Desulfocapsaceae	#N/A	Desulfofustis	#N/A	Bacteria	Desulfobacterales	#N/A	Proteobacteria	0	#N/A	#N/A	#N/A	1575	3756	0.419329
GCA_002687025.1	/data2/marine_genomes_and_metagenomes/genomes_The_MAR_databases/prodigal_short/MAR/Candidatus_Poribacteria_bacterium_ARS61_GCA_002687025.1.fas	§insdc.gca:GCA_002687025.1	§mmp.db:MMP07619755	Unclassified	Unclassified	§gtdb:GCA_002687025.1	Unclassified	Bacteria|Poribacteria|WGA-4E|GCA-2687025|GCA-2687025|GCA-2687025|GCA-2687025 sp002687025	Bacteria	Unclassified	Candidatus Poribacteria bacterium§taxonomy:2026781	Unclassified	Unclassified	ARS-61	0	0	731	4671	0.156498	MarDB
GCA_000830435.1	/data2/marine_genomes_and_metagenomes/genomes_The_MAR_databases/prodigal_short/MAR/Vibrio_ishigakensis_JCM19232_GCA_000830435.1.fas	§insdc.gca:GCA_000830435.1	§mmp.db:MMP00017304	Gammaproteobacteria	Vibrionaceae	§gtdb:GCA_000830415.1	Vibrio	Bacteria|Proteobacteria|Gammaproteobacteria|Enterobacterales|Vibrionaceae|Vibrio|Vibrio ishigakensis	Bacteria	Vibrionales	1481922	Proteobacteria	Unclassified	JCM 19232	0	0	1838	6391	0.287592	MarDB
GCA_001627315.1	/data2/marine_genomes_and_metagenomes/genomes_The_MAR_databases/prodigal_short/MAR/Nocardioides_sp._REDSEA-S40_B4_GCA_001627315.1.fas	§insdc.gca:GCA_001627315.1	§mmp.db:MMP04534617	Actinobacteria	Nocardioidaceae	§gtdb:GCA_001627335.1	Nocardioides	Bacteria|Actinobacteriota|Actinobacteria|Propionibacteriales|Nocardioidaceae|Nocardioides|Nocardioides sp001627335	Bacteria	Propionibacteriales	Nocardioides sp. REDSEA-S40_B4§taxonomy:1811559	Actinobacteria	Unclassified	REDSEA-S40_B4	0	0	1160	3682	0.315046	MarDB
GCA_002691825.1	/data2/marine_genomes_and_metagenomes/genomes_The_MAR_databases/prodigal_short/MAR/Porticoccaceae_bacterium_MED584_GCA_002691825.1.fas	§insdc.gca:GCA_002691825.1	§mmp.db:MMP07619774	Gammaproteobacteria	Porticoccaceae	§gtdb:GCA_002691825.1	Unclassified	Bacteria|Proteobacteria|Gammaproteobacteria|Pseudomonadales|Porticoccaceae|TMED48|TMED48 sp002691825	Bacteria	Cellvibrionales	Porticoccaceae bacterium§taxonomy:2026782	Proteobacteria	Unclassified	MED-584	0	0	400	1647	0.242866	MarDB
GCA_003278605.1	/data2/marine_genomes_and_metagenomes/genomes_The_MAR_databases/prodigal_short/MAR/Prochlorococcus_sp._AG-355-M02_GCA_003278605.1.fas	§insdc.gca:GCA_003278605.1	§mmp.db:MMP08886209	Cyanobacteria (class)	Prochloraceae	§gtdb:GCF_001989455.1	Prochlorococcus	Bacteria|Cyanobacteria|Cyanobacteriia|Synechococcales|Cyanobiaceae|Prochlorococcus_A|Prochlorococcus_A sp001989455	Bacteria	Synechococcales	Prochlorococcus sp. AG-355-M02§taxonomy:2162121	Cyanobacteria	Prochlorococcus sp. AG-355-M02	AG-355-M02	0	0	359	1798	0.199666	MarDB
GCA_003529645.1	/data2/marine_genomes_and_metagenomes/genomes_The_MAR_databases/prodigal_short/MAR/Gammaproteobacteria_bacterium_UBA9069_GCA_003529645.1.fas	§insdc.gca:GCA_003529645.1	§mmp.db:MMP08020136	Gammaproteobacteria	Unclassified	§gtdb:GCA_003489145.1	Unclassified	Bacteria|Proteobacteria|Gammaproteobacteria|Thiomicrospirales|Thioglobaceae|UBA2013|UBA2013 sp003489145	Bacteria	Unclassified	Gammaproteobacteria bacterium§taxonomy:1913989	Proteobacteria	Gammaproteobacteria bacterium	UBA9069	0	0	617	1100	0.560909	MarDB
GCA_002456915.1	/data2/marine_genomes_and_metagenomes/genomes_The_MAR_databases/prodigal_short/MAR/Puniceicoccaceae_bacterium_MED-G31_GCA_002456915.1.fas	§insdc.gca:GCA_002456915.1	§mmp.db:MMP06890642	Opitutae	Puniceicoccaceae	§gtdb:GCA_002699365.1	Unclassified	Bacteria|Verrucomicrobiota|Verrucomicrobiae|Opitutales|Puniceicoccaceae|GCA-2699365|GCA-2699365 sp002699365	Bacteria	Puniceicoccales	Puniceicoccaceae bacterium MED-G31§taxonomy:1986245	Verrucomicrobia	Unclassified	MED-G31	0	0	975	975	1	MarDB
GCA_002427745.1	/data2/marine_genomes_and_metagenomes/genomes_The_MAR_databases/prodigal_short/MAR/Roseivirga_sp._UBA6061_GCA_002427745.1.fas	§insdc.gca:GCA_002427745.1	§mmp.db:MMP06450630	Cytophagia	Flammeovirgaceae	§gtdb:GCA_002427745.1	Roseivirga	Bacteria|Bacteroidota|Bacteroidia|Cytophagales|Cyclobacteriaceae|Roseivirga_A|Roseivirga_A sp002427745	Bacteria	Cytophagales	Roseivirga sp. UBA6061§taxonomy:1947390	Bacteroidetes	Unclassified	UBA6061	0	0	2860	6786	0.421456	MarDB
GCA_002693745.1	/data2/marine_genomes_and_metagenomes/genomes_The_MAR_databases/prodigal_short/MAR/Flavobacteriales_bacterium_EAC38_GCA_002693745.1.fas	§insdc.gca:GCA_002693745.1	§mmp.db:MMP07619047	Flavobacteriia	Unclassified	§gtdb:GCA_002693745.1	Unclassified	Bacteria|Bacteroidota|Bacteroidia|Flavobacteriales|BACL11|BACL11|BACL11 sp002693745	Bacteria	Flavobacteriales	Flavobacteriales bacterium§taxonomy:2021391	Bacteroidetes	Unclassified	EAC-38	0	0	284	1208	0.235099	MarDB
GCA_003645655.1	/data2/marine_genomes_and_metagenomes/genomes_The_MAR_databases/prodigal_short/MAR/Spirochaetes_bacterium_B121_G9_GCA_003645655.1.fas	§insdc.gca:GCA_003645655.1	§mmp.db:MMP09215296	Unclassified	Unclassified	0	Unclassified	Bacteria|Spirochaetota|Spirochaetia|Spirochaetales|Sediminispirochaetaceae	Bacteria	Unclassified	Spirochaetes bacterium§taxonomy:2202144	Spirochaetes	Spirochaetes bacterium	B121_G9	0	0	828	2728	0.303519	MarDB
GCA_000635155.1	/data2/marine_genomes_and_metagenomes/genomes_The_MAR_databases/prodigal_short/MAR/Prochlorococcus_sp._scB245a_519C7_GCA_000635155.1.fas	§insdc.gca:GCA_000635155.1	§mmp.db:MMP02671382	Cyanobacteria (class)	Prochloraceae	§gtdb:GCA_000635495.1	Prochlorococcus	Bacteria|Cyanobacteria|Cyanobacteriia|Synechococcales|Cyanobiaceae|Prochlorococcus_A|Prochlorococcus_A sp000635495	Bacteria	Synechococcales	Prochlorococcus sp. scB245a_519C7§taxonomy:1471511	Cyanobacteria	Unclassified	scB245a_519C7	0	0	705	1792	0.393415	MarDB
GCA_002707865.1	/data2/marine_genomes_and_metagenomes/genomes_The_MAR_databases/prodigal_short/MAR/Magnetococcales_bacterium_SAT227_GCA_002707865.1.fas	§insdc.gca:GCA_002707865.1	§mmp.db:MMP07619306	Alphaproteobacteria	Unclassified	§gtdb:GCA_002436405.1	Unclassified	Bacteria|Proteobacteria|Alphaproteobacteria|UBA1280|UBA6503|UBA6503|UBA6503 sp002436405	Bacteria	Magnetococcales	Magnetococcales bacterium§taxonomy:2026759	Proteobacteria	Unclassified	SAT-227	0	0	1288	2696	0.477745	MarDB
GCA_002733385.1	/data2/marine_genomes_and_metagenomes/genomes_The_MAR_databases/prodigal_short/MAR/Robiginitomaculum_sp._NORP61_GCA_002733385.1.fas	§insdc.gca:GCA_002733385.1	§mmp.db:MMP07568875	Alphaproteobacteria	Hyphomonadaceae	§gtdb:GCA_002733385.1	Robiginitomaculum	Bacteria|Proteobacteria|Alphaproteobacteria|Caulobacterales|Maricaulaceae|Robiginitomaculum_A|Robiginitomaculum_A sp002733385	Bacteria	Rhodobacterales	Robiginitomaculum sp.§taxonomy:2030823	Proteobacteria	Unclassified	NORP61	0	0	639	2841	0.224921	MarDB
GCA_002705055.1	/data2/marine_genomes_and_metagenomes/genomes_The_MAR_databases/prodigal_short/MAR/Planctomycetes_bacterium_NAT19_GCA_002705055.1.fas	§insdc.gca:GCA_002705055.1	§mmp.db:MMP07619738	Unclassified	Unclassified	§gtdb:GCA_002705055.1	Unclassified	Bacteria|Planctomycetota|UBA1135|UBA1135|UBA1135|GCA-2705055|GCA-2705055 sp002705055	Bacteria	Unclassified	Planctomycetes bacterium§taxonomy:2026780	Planctomycetes	Unclassified	NAT-19	0	0	3231	3231	1	MarDB
GCA_002434765.1	/data2/marine_genomes_and_metagenomes/genomes_The_MAR_databases/prodigal_short/MAR/Patescibacteria_group_bacterium_UBA6534_GCA_002434765.1.fas	§insdc.gca:GCA_002434765.1	§mmp.db:MMP06452185	Unclassified	Unclassified	§gtdb:GCA_002687905.1	Unclassified	Bacteria|Patescibacteria|Paceibacteria|UBA9983_A|UBA2163|UBA6534|UBA6534 sp002687905	Bacteria	Unclassified	Patescibacteria group bacterium UBA6534§taxonomy:1948856	Unclassified	Unclassified	UBA6534	0	0	260	491	0.529532	MarDB
GCA_002721915.1	/data2/marine_genomes_and_metagenomes/genomes_The_MAR_databases/prodigal_short/MAR/Woeseia_sp._SP227_GCA_002721915.1.fas	§insdc.gca:GCA_002721915.1	§mmp.db:MMP07620241	Gammaproteobacteria	Woeseiaceae	0	Woeseia	Bacteria|Proteobacteria|Gammaproteobacteria|Woeseiales|Woeseiaceae|GCA-2685275	Bacteria	Chromatiales	Woeseia sp.§taxonomy:1980636	Proteobacteria	Unclassified	SP-227	0	0	486	1294	0.37558	MarDB
GCA_000695055.1	/data2/marine_genomes_and_metagenomes/genomes_The_MAR_databases/prodigal_short/MAR/Vibrio_sp._JCM_18905_GCA_000695055.1.fas	§insdc.gca:GCA_000695055.1	§mmp.db:MMP00000561	Gammaproteobacteria	Vibrionaceae	§gtdb:GCF_001048675.1	Vibrio	Bacteria|Proteobacteria|Gammaproteobacteria|Enterobacterales|Vibrionaceae|Vibrio|Vibrio diabolicus	Bacteria	Vibrionales	Vibrio sp. JCM 18905§taxonomy:1298600	Proteobacteria	Unclassified	JCM 18905	0	0	1653	6281	0.263175	MarDB
GCA_003250275.1	/data2/marine_genomes_and_metagenomes/genomes_The_MAR_databases/prodigal_short/MAR/Alphaproteobacteria_bacterium_SZUA-538_GCA_003250275.1.fas	§insdc.gca:GCA_003250275.1	§mmp.db:MMP09288086	Alphaproteobacteria	Unclassified	§gtdb:GCA_003250275.1	Unclassified	Bacteria|Proteobacteria|Alphaproteobacteria|Rhodospirillales|Rhodospirillaceae|Alpha-05|Alpha-05 sp003250275	Bacteria	Unclassified	Alphaproteobacteria bacterium§taxonomy:1913988	Proteobacteria	Alphaproteobacteria bacterium	SZUA-538	0	0	810	3437	0.235671	MarDB
GCA_003235095.1	/data2/marine_genomes_and_metagenomes/genomes_The_MAR_databases/prodigal_short/MAR/Chloroflexi_bacterium_SZUA-290_GCA_003235095.1.fas	§insdc.gca:GCA_003235095.1	§mmp.db:MMP09287838	Unclassified	Unclassified	0	Unclassified	Bacteria|Chloroflexota|Dehalococcoidia|Dehalococcoidales|UBA2162|MGML01	Bacteria	Unclassified	Chloroflexi bacterium§taxonomy:2026724	Chloroflexi	Chloroflexi bacterium	SZUA-290	0	0	614	2200	0.279091	MarDB
GCA_003476945.1	/data2/marine_genomes_and_metagenomes/genomes_The_MAR_databases/prodigal_short/MAR/Psychrobacter_sp._UBA9367_GCA_003476945.1.fas	§insdc.gca:GCA_003476945.1	§mmp.db:MMP08018095	Gammaproteobacteria	Moraxellaceae	0	Psychrobacter	Bacteria|Proteobacteria|Gammaproteobacteria|Pseudomonadales|Moraxellaceae|Psychrobacter	Bacteria	Pseudomonadales	Psychrobacter sp.§taxonomy:56811	Proteobacteria	Psychrobacter sp.	UBA9367	0	0	699	2373	0.294564	MarDB
GCA_003282745.1	/data2/marine_genomes_and_metagenomes/genomes_The_MAR_databases/prodigal_short/MAR/Prochlorococcus_sp._AG-331-B22_GCA_003282745.1.fas	§insdc.gca:GCA_003282745.1	§mmp.db:MMP08886049	Cyanobacteria (class)	Prochloraceae	0	Prochlorococcus	Bacteria|Cyanobacteria|Cyanobacteriia|Synechococcales|Cyanobiaceae|Prochlorococcus_B	Bacteria	Synechococcales	Prochlorococcus sp. AG-331-B22§taxonomy:2162409	Cyanobacteria	Prochlorococcus sp. AG-331-B22	AG-331-B22	0	0	218	291	0.749141	MarDB
GCA_001304425.1	/data2/marine_genomes_and_metagenomes/genomes_The_MAR_databases/prodigal_short/MAR/Betaproteobacteria_bacterium_SG8_40_GCA_001304425.1.fas	§insdc.gca:GCA_001304425.1	§mmp.db:MMP03994180	Betaproteobacteria	Unclassified	§gtdb:GCA_001304425.1	Unclassified	Bacteria|Proteobacteria|Gammaproteobacteria|Burkholderiales|SG8-40|SG8-40|SG8-40 sp001304425	Bacteria	Unclassified	Betaproteobacteria bacterium SG8_40§taxonomy:1703389	Proteobacteria	Unclassified	SG8_40	0	0	919	2511	0.36599	MarDB
GCA_003246175.1	/data2/marine_genomes_and_metagenomes/genomes_The_MAR_databases/prodigal_short/MAR/Nitrospirae_bacterium_SZUA-389_GCA_003246175.1.fas	§insdc.gca:GCA_003246175.1	§mmp.db:MMP09287937	Unclassified	Unclassified	0	Unclassified	Bacteria|Nitrospirota|Nitrospiria|Nitrospirales|Nitrospiraceae	Bacteria	Unclassified	Nitrospirae bacterium§taxonomy:2026887	Nitrospirae	Nitrospirae bacterium	SZUA-389	0	0	605	1765	0.342776	MarDB
GCA_002408125.1	/data2/marine_genomes_and_metagenomes/genomes_The_MAR_databases/prodigal_short/MAR/Hyphomonadaceae_bacterium_UBA5336_GCA_002408125.1.fas	§insdc.gca:GCA_002408125.1	§mmp.db:MMP06451284	Alphaproteobacteria	Hyphomonadaceae	§gtdb:GCA_002408125.1	Unclassified	Bacteria|Proteobacteria|Alphaproteobacteria|Caulobacterales|Hyphomonadaceae|UBA5336|UBA5336 sp002408125	Bacteria	Rhodobacterales	Hyphomonadaceae bacterium UBA5336§taxonomy:1951953	Proteobacteria	Unclassified	UBA5336	0	0	593	3411	0.173849	MarDB
GCA_003641795.1	/data2/marine_genomes_and_metagenomes/genomes_The_MAR_databases/prodigal_short/MAR/Thermotogae_bacterium_B41_G15_GCA_003641795.1.fas	§insdc.gca:GCA_003641795.1	§mmp.db:MMP09214902	Unclassified	Unclassified	0	Unclassified	Bacteria|Thermotogota|Thermotogae|UBA12178|UBA12178|UBA12178	Bacteria	Unclassified	Thermotogae bacterium§taxonomy:2053689	Thermotogae	Thermotogae bacterium	B41_G15	0	0	427	2126	0.200847	MarDB
GCA_002686415.1	/data2/marine_genomes_and_metagenomes/genomes_The_MAR_databases/prodigal_short/MAR/Actinobacteria_bacterium_ARS123_GCA_002686415.1.fas	§insdc.gca:GCA_002686415.1	§mmp.db:MMP07618239	Actinobacteria	Unclassified	§gtdb:GCA_002727235.1	Unclassified	Bacteria|Actinobacteriota|Acidimicrobiia|Microtrichales|Ilumatobacteraceae|Casp-actino5|Casp-actino5 sp002727235	Bacteria	Unclassified	Actinobacteria bacterium§taxonomy:1883427	Actinobacteria	Unclassified	ARS-123	0	0	1057	1977	0.534648	MarDB
GCA_002366545.1	/data2/marine_genomes_and_metagenomes/genomes_The_MAR_databases/prodigal_short/MAR/Candidatus_Oleimmundimicrobium_americanum_UBA3085_GCA_002366545.1.fas	§insdc.gca:GCA_002366545.1	§mmp.db:MMP06453901	Unclassified	Unclassified	§gtdb:GCA_002366545.1	Unclassified	Bacteria|Actinobacteriota|UBA9087|UBA9087|UBA3085|UBA3085|UBA3085 sp002366545	Bacteria	Unclassified	Actinobacteria bacterium UBA3085§taxonomy:1953122	Actinobacteria	Unclassified	UBA3085	0	0	148	1535	0.0964169	MarDB
GCA_003978875.1	/data2/marine_genomes_and_metagenomes/genomes_The_MAR_databases/prodigal_short/MAR/Aquifex_sp._MAG_11_GCA_003978875.1.fas	§insdc.gca:GCA_003978875.1	§mmp.db:MMP09407819	Aquificae	Aquificaceae	0	Aquifex	Bacteria|Aquificota|Aquificae|Aquificales|Aquificaceae|Aquifex	Bacteria	Aquificales	Aquifex sp.§taxonomy:313370	Aquificae	Aquifex sp.	MAG 11	0	0	810	1994	0.406219	MarDB
GCA_002414935.1	/data2/marine_genomes_and_metagenomes/genomes_The_MAR_databases/prodigal_short/MAR/Sinobacteraceae_bacterium_UBA5061_GCA_002414935.1.fas	§insdc.gca:GCA_002414935.1	§mmp.db:MMP06456020	Gammaproteobacteria	Sinobacteraceae	§gtdb:GCA_002706265.1	Unclassified	Bacteria|Proteobacteria|Gammaproteobacteria|Nevskiales|Nevskiaceae|Polycyclovorans|Polycyclovorans sp002706265	Bacteria	Nevskiales	Sinobacteraceae bacterium UBA5061§taxonomy:1953077	Proteobacteria	Unclassified	UBA5061	0	0	912	2609	0.349559	MarDB
GCA_003210175.1	/data2/marine_genomes_and_metagenomes/genomes_The_MAR_databases/prodigal_short/MAR/Prochlorococcus_sp._AG-424-A14_GCA_003210175.1.fas	§insdc.gca:GCA_003210175.1	§mmp.db:MMP08886442	Cyanobacteria (class)	Prochloraceae	§gtdb:GCA_000634515.1	Prochlorococcus	Bacteria|Cyanobacteria|Cyanobacteriia|Synechococcales|Cyanobiaceae|Prochlorococcus_A|Prochlorococcus_A sp000634515	Bacteria	Synechococcales	Prochlorococcus sp. AG-424-A14§taxonomy:2162294	Cyanobacteria	Prochlorococcus sp. AG-424-A14	AG-424-A14	0	0	541	1501	0.360426	MarDB
GCA_002708415.1	/data2/marine_genomes_and_metagenomes/genomes_The_MAR_databases/prodigal_short/MAR/Micavibrio_sp._SAT2594_GCA_002708415.1.fas	§insdc.gca:GCA_002708415.1	§mmp.db:MMP07619475	Alphaproteobacteria	Alphaproteobacteria (family)	§gtdb:GCA_002708415.1	Micavibrio	Bacteria|Proteobacteria|Alphaproteobacteria|Micavibrionales|Micavibrionaceae|GCA-2708415|GCA-2708415 sp002708415	Bacteria	Alphaproteobacteria (order)	Micavibrio sp.§taxonomy:2024841	Proteobacteria	Unclassified	SAT-2594	0	0	455	1412	0.322238	MarDB
GCA_002162915.1	/data2/marine_genomes_and_metagenomes/genomes_The_MAR_databases/prodigal_short/MAR/Rhodospirillales_bacterium_47_12_T64_GCA_002162915.1.fas	§insdc.gca:GCA_002162915.1	§mmp.db:MMP05179575	Alphaproteobacteria	Unclassified	§gtdb:GCA_002162915.1	Unclassified	Bacteria|Proteobacteria|Alphaproteobacteria|Kiloniellales|Kiloniellaceae|Kiloniella|Kiloniella sp002162915	Bacteria	Rhodospirillales	Rhodospirillales bacterium 47_12_T64§taxonomy:1856302	Proteobacteria	Unclassified	47_12_T64	0	0	315	1477	0.21327	MarDB
GCA_003230415.1	/data2/marine_genomes_and_metagenomes/genomes_The_MAR_databases/prodigal_short/MAR/Gammaproteobacteria_bacterium_SZUA-218_GCA_003230415.1.fas	§insdc.gca:GCA_003230415.1	§mmp.db:MMP09240202	Gammaproteobacteria	Unclassified	0	Unclassified	Bacteria|Proteobacteria|Gammaproteobacteria|SZUA-229|SZUA-229|SZUA-116	Bacteria	Unclassified	Gammaproteobacteria bacterium§taxonomy:1913989	Proteobacteria	Gammaproteobacteria bacterium	SZUA-218	0	0	907	1686	0.53796	MarDB
GCA_003450615.1	/data2/marine_genomes_and_metagenomes/genomes_The_MAR_databases/prodigal_short/MAR/Methylococcaceae_bacterium_UBA9142_GCA_003450615.1.fas	§insdc.gca:GCA_003450615.1	§mmp.db:MMP08017697	Gammaproteobacteria	Methylococcaceae	§gtdb:GCA_002700385.1	Unclassified	Bacteria|Proteobacteria|Gammaproteobacteria|Methylococcales|Cycloclasticaceae|Cycloclasticus|Cycloclasticus sp002700385	Bacteria	Methylococcales	Methylococcaceae bacterium§taxonomy:1933926	Proteobacteria	Methylococcaceae bacterium	UBA9142	0	0	906	2158	0.419833	MarDB
GCA_003252515.1	/data2/marine_genomes_and_metagenomes/genomes_The_MAR_databases/prodigal_short/MAR/Candidatus_Delongbacteria_bacterium_SZUA-455_GCA_003252515.1.fas	§insdc.gca:GCA_003252515.1	§mmp.db:MMP09288003	Unclassified	Unclassified	§gtdb:GCA_003252515.1	Unclassified	Bacteria|Delongbacteria|UBA4055|UBA4055|UBA4055|UBA4055|UBA4055 sp003252515	Bacteria	Unclassified	Candidatus Delongbacteria bacterium§taxonomy:2044594	Candidatus Delongbacteria	Candidatus Delongbacteria bacterium	SZUA-455	0	0	406	2271	0.178776	MarDB
GCA_001510435.1	/data2/marine_genomes_and_metagenomes/genomes_The_MAR_databases/prodigal_short/MAR/Actinobacteria_bacterium_casp-actino7_GCA_001510435.1.fas	§insdc.gca:GCA_001510435.1	§mmp.db:MMP03733536	Actinobacteria	Unclassified	0	Unclassified	Bacteria|Actinobacteriota|Acidimicrobiia|Microtrichales|Ilumatobacteraceae|Casp-actino5	Bacteria	Unclassified	Actinobacteria bacterium casp-actino7§taxonomy:1661704	Actinobacteria	Unclassified	casp-actino7	0	0	168	336	0.5	MarDB
GCA_003646975.1	/data2/marine_genomes_and_metagenomes/genomes_The_MAR_databases/prodigal_short/MAR/Deltaproteobacteria_bacterium_B17_G16_GCA_003646975.1.fas	§insdc.gca:GCA_003646975.1	§mmp.db:MMP09214968	Deltaproteobacteria	Unclassified	0	Unclassified	Bacteria|Desulfobacterota|Desulfobacteria|Desulfatiglandales	Bacteria	Unclassified	Deltaproteobacteria bacterium§taxonomy:2026735	Proteobacteria	Deltaproteobacteria bacterium	B17_G16	0	0	720	3388	0.212515	MarDB
GCA_002690245.1	/data2/marine_genomes_and_metagenomes/genomes_The_MAR_databases/prodigal_short/MAR/Proteobacteria_bacterium_ARS1028_GCA_002690245.1.fas	§insdc.gca:GCA_002690245.1	§mmp.db:MMP07619795	Unclassified	Unclassified	0	Unclassified	Bacteria|Proteobacteria|Gammaproteobacteria|UBA11654|UBA11654|UBA11654	Bacteria	Unclassified	Proteobacteria bacterium§taxonomy:1977087	Proteobacteria	Unclassified	ARS-1028	0	0	409	840	0.486905	MarDB
GCA_002691025.1	/data2/marine_genomes_and_metagenomes/genomes_The_MAR_databases/prodigal_short/MAR/Spirochaeta_sp._MED672_GCA_002691025.1.fas	§insdc.gca:GCA_002691025.1	§mmp.db:MMP07620119	Spirochaetia	Spirochaetaceae	§gtdb:GCA_002691025.1	Spirochaeta	Bacteria|Myxococcota|UBA9160|UBA9160|UBA4427|MED660|MED660 sp002691025	Bacteria	Spirochaetales	Spirochaeta sp.§taxonomy:28185	Spirochaetes	Unclassified	MED-672	0	0	719	3575	0.201119	MarDB
GCA_002964685.1	/data2/marine_genomes_and_metagenomes/genomes_The_MAR_databases/prodigal_short/MAR/Pseudoalteromonas_sp._T1lg23Z_GCA_002964685.1.fas	§insdc.gca:GCA_002964685.1	§mmp.db:MMP08380954	Gammaproteobacteria	Pseudoalteromonadaceae	§gtdb:GCF_002964665.1	Pseudoalteromonas	Bacteria|Proteobacteria|Gammaproteobacteria|Enterobacterales|Alteromonadaceae|Pseudoalteromonas|Pseudoalteromonas sp002964665	Bacteria	Alteromonadales	Pseudoalteromonas sp. T1lg23Z§taxonomy:2077098	Proteobacteria	Pseudoalteromonas sp. T1lg23Z	T1lg23Z	0	0	705	4085	0.172583	MarDB
GCA_002435165.1	/data2/marine_genomes_and_metagenomes/genomes_The_MAR_databases/prodigal_short/MAR/Bacteriovoracaceae_bacterium_UBA6504_GCA_002435165.1.fas	§insdc.gca:GCA_002435165.1	§mmp.db:MMP06457518	Oligoflexia	Unclassified	§gtdb:GCA_002712005.1	Unclassified	Bacteria|Bdellovibrionota|Bacteriovoracia|Bacteriovoracales|Bacteriovoracaceae|GCA-2712005|GCA-2712005 sp002712005	Bacteria	Bacteriovoracales	Bacteriovoracaceae bacterium UBA6504§taxonomy:1961493	Proteobacteria	Unclassified	UBA6504	0	0	585	3211	0.182186	MarDB
GCA_003056085.1	/data2/marine_genomes_and_metagenomes/genomes_The_MAR_databases/prodigal_short/MAR/Parcubacteria_group_bacterium_M6-OD1-1_GCA_003056085.1.fas	§insdc.gca:GCA_003056085.1	§mmp.db:MMP04448854	Unclassified	Unclassified	§gtdb:GCA_003056085.1	Unclassified	Bacteria|Patescibacteria|Paceibacteria|GWC2-36-17|M10-OD1-4|M10-OD1-4|M10-OD1-4 sp003056085	Bacteria	Unclassified	Parcubacteria group bacterium M6-OD1-1§taxonomy:1795559	Unclassified	Parcubacteria group bacterium M6-OD1-1	M6-OD1-1	0	0	155	769	0.20156	MarDB
GCA_002390775.1	/data2/marine_genomes_and_metagenomes/genomes_The_MAR_databases/prodigal_short/MAR/Flavobacteriales_bacterium_UBA4418_GCA_002390775.1.fas	§insdc.gca:GCA_002390775.1	§mmp.db:MMP06456921	Flavobacteriia	Unclassified	§gtdb:GCA_002390775.1	Unclassified	Bacteria|Bacteroidota|Bacteroidia|Flavobacteriales|1G12|SHAN690|SHAN690 sp002390775	Bacteria	Flavobacteriales	Flavobacteriales bacterium UBA4418§taxonomy:1951005	Bacteroidetes	Unclassified	UBA4418	0	0	1315	2313	0.568526	MarDB
GCA_002717765.1	/data2/marine_genomes_and_metagenomes/genomes_The_MAR_databases/prodigal_short/MAR/Candidatus_Marinimicrobia_bacterium_SP41_GCA_002717765.1.fas	§insdc.gca:GCA_002717765.1	§mmp.db:MMP07619414	Unclassified	Unclassified	§gtdb:GCA_002717765.1	Unclassified	Bacteria|Marinisomatota|Marinisomatia|Marinisomatales|TCS55|TMED108|TMED108 sp002717765	Bacteria	Unclassified	Candidatus Marinimicrobia bacterium§taxonomy:2026760	Unclassified	Unclassified	SP-41	0	0	711	1219	0.583265	MarDB
GCA_002696115.1	/data2/marine_genomes_and_metagenomes/genomes_The_MAR_databases/prodigal_short/MAR/Roseovarius_sp._EAC48_GCA_002696115.1.fas	§insdc.gca:GCA_002696115.1	§mmp.db:MMP07620059	Alphaproteobacteria	Rhodobacteraceae	§gtdb:GCF_000152625.1	Roseovarius	Bacteria|Proteobacteria|Alphaproteobacteria|Rhodobacterales|Rhodobacteraceae|Roseovarius|Roseovarius nubinhibens	Bacteria	Rhodobacterales	Roseovarius sp.§taxonomy:1486281	Proteobacteria	Unclassified	EAC-48	0	0	611	3200	0.190938	MarDB
GCA_002721255.1	/data2/marine_genomes_and_metagenomes/genomes_The_MAR_databases/prodigal_short/MAR/Flavobacteriaceae_bacterium_SP283_GCA_002721255.1.fas	§insdc.gca:GCA_002721255.1	§mmp.db:MMP07619026	Flavobacteriia	Flavobacteriaceae	§gtdb:GCA_002313325.1	Unclassified	Bacteria|Bacteroidota|Bacteroidia|Flavobacteriales|Flavobacteriaceae|UBA7446|UBA7446 sp002313325	Bacteria	Flavobacteriales	Flavobacteriaceae bacterium§taxonomy:1871037	Bacteroidetes	Unclassified	SP-283	0	0	680	2139	0.317906	MarDB
GCA_003174395.1	/data2/marine_genomes_and_metagenomes/genomes_The_MAR_databases/prodigal_short/MAR/Streptococcus_agalactiae_QMA0280_GCA_003174395.1.fas	#N/A	#N/A	Bacilli	Streptococcaceae	#N/A	Streptococcus	#N/A	Bacteria	Lactobacillales	#N/A	Firmicutes	#N/A	#N/A	#N/A	#N/A	264	1853	0.142472
GCA_002747105.1	/data2/marine_genomes_and_metagenomes/genomes_The_MAR_databases/prodigal_short/MAR/Flavobacteriales_bacterium_DOLJORAL78_33_11_GCA_002747105.1.fas	§insdc.gca:GCA_002747105.1	§mmp.db:MMP07757465	Flavobacteriia	Unclassified	§gtdb:GCA_002747105.1	Unclassified	Bacteria|Bacteroidota|Bacteroidia|Flavobacteriales|Weeksellaceae|GCA-2747105|GCA-2747105 sp002747105	Bacteria	Flavobacteriales	Flavobacteriales bacterium§taxonomy:2021391	Bacteroidetes	Unclassified	DOLJORAL78_33_11	0	0	51	1154	0.0441941	MarDB
GCA_002337545.1	/data2/marine_genomes_and_metagenomes/genomes_The_MAR_databases/prodigal_short/MAR/Phycisphaerales_bacterium_UBA1910_GCA_002337545.1.fas	§insdc.gca:GCA_002337545.1	§mmp.db:MMP06455527	Phycisphaerae	Unclassified	§gtdb:GCA_002337545.1	Unclassified	Bacteria|Planctomycetota|Phycisphaerae|Phycisphaerales|SM1A02|UBA1924|UBA1924 sp002337545	Bacteria	Phycisphaerales	Phycisphaerales bacterium UBA1910§taxonomy:1951186	Planctomycetes	Unclassified	UBA1910	0	0	913	3160	0.288924	MarDB
GCA_003213855.1	/data2/marine_genomes_and_metagenomes/genomes_The_MAR_databases/prodigal_short/MAR/Prochlorococcus_sp._AG-418-O03_GCA_003213855.1.fas	§insdc.gca:GCA_003213855.1	§mmp.db:MMP08886424	Cyanobacteria (class)	Prochloraceae	§gtdb:GCA_003213855.1	Prochlorococcus	Bacteria|Cyanobacteria|Cyanobacteriia|Synechococcales|Cyanobiaceae|Prochlorococcus_A|Prochlorococcus_A sp003213855	Bacteria	Synechococcales	Prochlorococcus sp. AG-418-O03§taxonomy:2162290	Cyanobacteria	Prochlorococcus sp. AG-418-O03	AG-418-O03	0	0	325	1567	0.207403	MarDB
GCA_003279865.1	/data2/marine_genomes_and_metagenomes/genomes_The_MAR_databases/prodigal_short/MAR/Prochlorococcus_sp._AG-388-I18_GCA_003279865.1.fas	§insdc.gca:GCA_003279865.1	§mmp.db:MMP08886275	Cyanobacteria (class)	Prochloraceae	§gtdb:GCF_000011465.1	Prochlorococcus	Bacteria|Cyanobacteria|Cyanobacteriia|Synechococcales|Cyanobiaceae|Prochlorococcus_A|Prochlorococcus_A marinus_S	Bacteria	Synechococcales	Prochlorococcus sp. AG-388-I18§taxonomy:2162247	Cyanobacteria	Prochlorococcus sp. AG-388-I18	AG-388-I18	0	0	503	1827	0.275315	MarDB
GCA_003230915.1	/data2/marine_genomes_and_metagenomes/genomes_The_MAR_databases/prodigal_short/MAR/Kiritimatiellales_bacterium_SZUA-127_GCA_003230915.1.fas	§insdc.gca:GCA_003230915.1	§mmp.db:MMP09240111	Kiritimatiellae	Unclassified	§gtdb:GCA_003230915.1	Unclassified	Bacteria|Verrucomicrobiota|Kiritimatiellae|Kiritimatiellales|UBA1859|SZUA-127|SZUA-127 sp003230915	Bacteria	Kiritimatiellales	Kiritimatiellales bacterium§taxonomy:2202731	Kiritimatiellaeota	Kiritimatiellales bacterium	SZUA-127	0	0	532	1894	0.280887	MarDB
GCA_003504455.1	/data2/marine_genomes_and_metagenomes/genomes_The_MAR_databases/prodigal_short/MAR/Pseudomonas_sp._UBA9693_GCA_003504455.1.fas	§insdc.gca:GCA_003504455.1	§mmp.db:MMP08017587	Gammaproteobacteria	Pseudomonadaceae	§gtdb:GCA_003293815.1	Pseudomonas	Bacteria|Proteobacteria|Gammaproteobacteria|Pseudomonadales|Pseudomonadaceae|Pseudomonas_A|Pseudomonas_A zhaodongensis	Bacteria	Pseudomonadales	Pseudomonas sp.§taxonomy:306	Proteobacteria	Pseudomonas sp.	UBA9693	0	0	804	4524	0.177719	MarDB
GCA_003247535.1	/data2/marine_genomes_and_metagenomes/genomes_The_MAR_databases/prodigal_short/MAR/Desulfobacterales_bacterium_SZUA-337_GCA_003247535.1.fas	§insdc.gca:GCA_003247535.1	§mmp.db:MMP09287885	Deltaproteobacteria	Unclassified	0	Unclassified	Bacteria|Desulfobacterota|Desulfobacteria|Desulfobacterales	Bacteria	Desulfobacterales	Desulfobacterales bacterium§taxonomy:2044940	Proteobacteria	Desulfobacterales bacterium	SZUA-337	0	0	326	1089	0.299357	MarDB
GCA_002338405.1	/data2/marine_genomes_and_metagenomes/genomes_The_MAR_databases/prodigal_short/MAR/Opitutae_bacterium_UBA1856_GCA_002338405.1.fas	§insdc.gca:GCA_002338405.1	§mmp.db:MMP06454246	Opitutae	Unclassified	§gtdb:GCA_002469895.1	Unclassified	Bacteria|Verrucomicrobiota|Verrucomicrobiae|Opitutales|Puniceicoccaceae|Coraliomargarita|Coraliomargarita sp002469895	Bacteria	Unclassified	Opitutae bacterium UBA1856§taxonomy:1948710	Verrucomicrobia	Unclassified	UBA1856	0	0	1574	1574	1	MarDB
GCA_001303885.1	/data2/marine_genomes_and_metagenomes/genomes_The_MAR_databases/prodigal_short/MAR/Planctomycetes_bacterium_SM23_32_GCA_001303885.1.fas	§insdc.gca:GCA_001303885.1	§mmp.db:MMP03994198	Unclassified	Unclassified	§gtdb:GCA_001303885.1	Unclassified	Bacteria|Planctomycetota|Brocadiae|SM23-32|SM23-32|SM23-32|SM23-32 sp001303885	Bacteria	Unclassified	Planctomycetes bacterium SM23_32§taxonomy:1704029	Planctomycetes	Unclassified	SM23_32	0	0	428	2112	0.202652	MarDB
GCA_003448085.1	/data2/marine_genomes_and_metagenomes/genomes_The_MAR_databases/prodigal_short/MAR/Methylophaga_sp._UBA10688_GCA_003448085.1.fas	§insdc.gca:GCA_003448085.1	§mmp.db:MMP08017487	Gammaproteobacteria	Piscirickettsiaceae	§gtdb:GCA_002696735.1	Methylophaga	Bacteria|Proteobacteria|Gammaproteobacteria|Nitrosococcales|Methylophagaceae|Methylophaga|Methylophaga sp002696735	Bacteria	Thiotrichales	Methylophaga sp.§taxonomy:2024840	Proteobacteria	Methylophaga sp.	UBA10688	0	0	836	2841	0.294263	MarDB
GCA_001657375.1	/data2/marine_genomes_and_metagenomes/genomes_The_MAR_databases/prodigal_short/MAR/Planctomycetaceae_bacterium_BBD_1991-11_GCA_001657375.1.fas	§insdc.gca:GCA_001657375.1	§mmp.db:MMP04939176	Planctomycetia	Planctomycetaceae	0	Unclassified	Bacteria|Planctomycetota|Phycisphaerae|Phycisphaerales|SM1A02	Bacteria	Planctomycetales	Planctomycetaceae bacterium BBD 1991-11§taxonomy:1852623	Planctomycetes	Unclassified	BBD 1991-11	0	0	1629	4507	0.361438	MarDB
GCA_002377325.1	/data2/marine_genomes_and_metagenomes/genomes_The_MAR_databases/prodigal_short/MAR/Gemmatimonadales_bacterium_UBA3512_GCA_002377325.1.fas	§insdc.gca:GCA_002377325.1	§mmp.db:MMP06455540	Gemmatimonadetes	Unclassified	§gtdb:GCA_002500925.1	Unclassified	Bacteria|Gemmatimonadota|Gemmatimonadetes|SG8-23|UBA6960|UBA2589|UBA2589 sp002500925	Bacteria	Gemmatimonadales	Gemmatimonadales bacterium UBA3512§taxonomy:1951115	Gemmatimonadetes	Unclassified	UBA3512	0	0	807	2255	0.357871	MarDB
GCA_000760625.1	/data2/marine_genomes_and_metagenomes/genomes_The_MAR_databases/prodigal_short/MAR/Vibrio_fluvialis_539_GCA_000760625.1.fas	§insdc.gca:GCA_000760625.1	§mmp.db:MMP03002133	Gammaproteobacteria	Vibrionaceae	§gtdb:GCF_001558415.2	Vibrio	Bacteria|Proteobacteria|Gammaproteobacteria|Enterobacterales|Vibrionaceae|Vibrio|Vibrio fluvialis	Bacteria	Vibrionales	Vibrio fluvialis 539§taxonomy:1315313	Proteobacteria	Vibrio fluvialis	Eikenella corrodens§taxonomy:539	0	0	1409	5658	0.249028	MarDB
GCA_003645745.1	/data2/marine_genomes_and_metagenomes/genomes_The_MAR_databases/prodigal_short/MAR/Candidatus_Omnitrophica_bacterium_B26_G9_GCA_003645745.1.fas	§insdc.gca:GCA_003645745.1	§mmp.db:MMP09215260	Unclassified	Unclassified	0	Unclassified	Bacteria|Omnitrophota|koll11|UBA10183	Bacteria	Unclassified	Candidatus Omnitrophica bacterium§taxonomy:2035772	Candidatus Omnitrophica	Candidatus Omnitrophica bacterium	B26_G9	0	0	494	1505	0.328239	MarDB
GCA_003284125.1	/data2/marine_genomes_and_metagenomes/genomes_The_MAR_databases/prodigal_short/MAR/Prochlorococcus_sp._AG-315-M16_GCA_003284125.1.fas	§insdc.gca:GCA_003284125.1	§mmp.db:MMP08885979	Cyanobacteria (class)	Prochloraceae	0	Prochlorococcus	Bacteria|Cyanobacteria|Cyanobacteriia|Synechococcales|Cyanobiaceae|Prochlorococcus_B	Bacteria	Synechococcales	Prochlorococcus sp. AG-315-M16§taxonomy:2162435	Cyanobacteria	Prochlorococcus sp. AG-315-M16	AG-315-M16	0	0	437	762	0.573491	MarDB
GCA_003215545.1	/data2/marine_genomes_and_metagenomes/genomes_The_MAR_databases/prodigal_short/MAR/Prochlorococcus_sp._AG-409-L14_GCA_003215545.1.fas	§insdc.gca:GCA_003215545.1	§mmp.db:MMP08886368	Cyanobacteria (class)	Prochloraceae	§gtdb:GCA_003215545.1	Prochlorococcus	Bacteria|Cyanobacteria|Cyanobacteriia|Synechococcales|Cyanobiaceae|AG-409-L14|AG-409-L14 sp003215545	Bacteria	Synechococcales	Prochlorococcus sp. AG-409-L14§taxonomy:2162490	Cyanobacteria	Prochlorococcus sp. AG-409-L14	AG-409-L14	0	0	958	1259	0.760921	MarDB
GCA_002413505.1	/data2/marine_genomes_and_metagenomes/genomes_The_MAR_databases/prodigal_short/MAR/Acidobacteria_bacterium_UBA5166_GCA_002413505.1.fas	§insdc.gca:GCA_002413505.1	§mmp.db:MMP06456398	Unclassified	Unclassified	§gtdb:GCA_002296225.1	Unclassified	Bacteria|Acidobacteriota|Vicinamibacteria|Vicinamibacterales|UBA823|UBA823|UBA823 sp002296225	Bacteria	Unclassified	Acidobacteria bacterium UBA5166§taxonomy:1953108	Acidobacteria	Unclassified	UBA5166	0	0	918	2208	0.415761	MarDB
GCA_002415575.1	/data2/marine_genomes_and_metagenomes/genomes_The_MAR_databases/prodigal_short/MAR/Alphaproteobacteria_bacterium_UBA5103_GCA_002415575.1.fas	§insdc.gca:GCA_002415575.1	§mmp.db:MMP06456908	Alphaproteobacteria	Unclassified	§gtdb:GCA_002709955.1	Unclassified	Bacteria|Proteobacteria|Alphaproteobacteria|UBA8366|GCA-2696645|GCA-2696645|GCA-2696645 sp002709955	Bacteria	Unclassified	Alphaproteobacteria bacterium UBA5103§taxonomy:1948407	Proteobacteria	Unclassified	UBA5103	0	0	764	4187	0.18247	MarDB
GCA_001874255.1	/data2/marine_genomes_and_metagenomes/genomes_The_MAR_databases/prodigal_short/MAR/Alphaproteobacteria_bacterium_MedPE-SWcel_GCA_001874255.1.fas	§insdc.gca:GCA_001874255.1	§mmp.db:MMP05219281	Alphaproteobacteria	Unclassified	§gtdb:GCA_001874255.1	Unclassified	Bacteria|Proteobacteria|Alphaproteobacteria|Rhodobacterales|Rhodobacteraceae|Tritonibacter|Tritonibacter sp001874255	Bacteria	Unclassified	Alphaproteobacteria bacterium MedPE-SWcel§taxonomy:1860092	Proteobacteria	Unclassified	MedPE-SWcel	0	0	379	3734	0.1015	MarDB
GCA_002731275.1	/data2/marine_genomes_and_metagenomes/genomes_The_MAR_databases/prodigal_short/MAR/Deltaproteobacteria_bacterium_NP119_GCA_002731275.1.fas	§insdc.gca:GCA_002731275.1	§mmp.db:MMP07618665	Deltaproteobacteria	Unclassified	§gtdb:GCA_002731275.1	Unclassified	Bacteria|Myxococcota|UBA6777|UBA6777|UBA6777|UBA6777|UBA6777 sp002731275	Bacteria	Unclassified	Deltaproteobacteria bacterium§taxonomy:2026735	Proteobacteria	Unclassified	NP-119	0	0	431	7891	0.0546192	MarDB
GCA_002401855.1	/data2/marine_genomes_and_metagenomes/genomes_The_MAR_databases/prodigal_short/MAR/Hyphomicrobiales_bacterium_NORP94_GCA_002401855.1.fas	§insdc.gca:GCA_002401855.1	§mmp.db:MMP07568908	Alphaproteobacteria	Unclassified	§gtdb:GCA_002401855.1	Unclassified	Bacteria|Proteobacteria|Alphaproteobacteria|Rhizobiales|OSC116|OCS116|OCS116 sp002401855	Bacteria	Rhizobiales	Rhizobiales bacterium§taxonomy:1909294	Proteobacteria	Unclassified	NORP94	0	0	617	3040	0.202961	MarDB
GCA_003545185.1	/data2/marine_genomes_and_metagenomes/genomes_The_MAR_databases/prodigal_short/MAR/Gemmatimonadetes_bacterium_UBA9271_GCA_003545185.1.fas	§insdc.gca:GCA_003545185.1	§mmp.db:MMP08019426	Unclassified	Unclassified	§gtdb:GCA_002348265.1	Unclassified	Bacteria|Gemmatimonadota|Gemmatimonadetes|SG8-23|UBA6960|UBA2589|UBA2589 sp002348265	Bacteria	Unclassified	Gemmatimonadetes bacterium§taxonomy:2026742	Gemmatimonadetes	Gemmatimonadetes bacterium	UBA9271	0	0	921	2055	0.448175	MarDB
GCA_002413635.1	/data2/marine_genomes_and_metagenomes/genomes_The_MAR_databases/prodigal_short/MAR/Microbacterium_sp._UBA5159_GCA_002413635.1.fas	§insdc.gca:GCA_002413635.1	§mmp.db:MMP06451562	Actinobacteria	Microbacteriaceae	§gtdb:GCF_900098805.1	Microbacterium	Bacteria|Actinobacteriota|Actinobacteria|Actinomycetales|Microbacteriaceae|Microbacterium|Microbacterium sp900098805	Bacteria	Micrococcales	Microbacterium sp. UBA5159§taxonomy:1946949	Actinobacteria	Unclassified	UBA5159	0	0	1001	3116	0.321245	MarDB
GCA_003497255.1	/data2/marine_genomes_and_metagenomes/genomes_The_MAR_databases/prodigal_short/MAR/Porticoccaceae_bacterium_UBA10964_GCA_003497255.1.fas	§insdc.gca:GCA_003497255.1	§mmp.db:MMP08018474	Gammaproteobacteria	Porticoccaceae	§gtdb:GCA_002431545.1	Unclassified	Bacteria|Proteobacteria|Gammaproteobacteria|Pseudomonadales|Porticoccaceae|HB2-32-21|HB2-32-21 sp002431545	Bacteria	Cellvibrionales	Porticoccaceae bacterium§taxonomy:2026782	Proteobacteria	Porticoccaceae bacterium	UBA10964	0	0	990	3137	0.315588	MarDB
GCA_003644635.1	/data2/marine_genomes_and_metagenomes/genomes_The_MAR_databases/prodigal_short/MAR/Candidatus_Latescibacteria_bacterium_B6_G15_GCA_003644635.1.fas	§insdc.gca:GCA_003644635.1	§mmp.db:MMP09214889	Unclassified	Unclassified	0	Unclassified	Bacteria|Latescibacterota|Latescibacteria_A|4484-107	Bacteria	Unclassified	Candidatus Latescibacteria bacterium§taxonomy:2053570	Candidatus Latescibacteria	Candidatus Latescibacteria bacterium	B6_G15	0	0	437	1538	0.284135	MarDB
GCA_002348825.1	/data2/marine_genomes_and_metagenomes/genomes_The_MAR_databases/prodigal_short/MAR/Gammaproteobacteria_bacterium_UBA2955_GCA_002348825.1.fas	§insdc.gca:GCA_002348825.1	§mmp.db:MMP06456934	Gammaproteobacteria	Unclassified	§gtdb:GCA_002348825.1	Unclassified	Bacteria|Proteobacteria|Gammaproteobacteria|Pseudomonadales|HTCC2089|UBA4421|UBA4421 sp002348825	Bacteria	Unclassified	Gammaproteobacteria bacterium UBA2955§taxonomy:1948602	Proteobacteria	Unclassified	UBA2955	0	0	708	2605	0.271785	MarDB
GCA_003250495.1	/data2/marine_genomes_and_metagenomes/genomes_The_MAR_databases/prodigal_short/MAR/Marinobacterium_sp._SZUA-523_GCA_003250495.1.fas	§insdc.gca:GCA_003250495.1	§mmp.db:MMP09288071	Gammaproteobacteria	Oceanospirillaceae	§gtdb:GCA_003250495.1	Marinobacterium	Bacteria|Proteobacteria|Gammaproteobacteria|Pseudomonadales|Nitrincolaceae|Marinobacterium|Marinobacterium sp003250495	Bacteria	Oceanospirillales	Marinobacterium sp.§taxonomy:1902815	Proteobacteria	Marinobacterium sp.	SZUA-523	0	0	730	3564	0.204826	MarDB
GCA_002731875.1	/data2/marine_genomes_and_metagenomes/genomes_The_MAR_databases/prodigal_short/MAR/Roseobacter_sp._NP10_GCA_002731875.1.fas	§insdc.gca:GCA_002731875.1	§mmp.db:MMP07620054	Alphaproteobacteria	Rhodobacteraceae	§gtdb:GCA_002731875.1	Roseobacter	Bacteria|Proteobacteria|Alphaproteobacteria|Rhodobacterales|Rhodobacteraceae|Sulfitobacter|Sulfitobacter sp002731875	Bacteria	Rhodobacterales	Roseobacter sp.§taxonomy:1907202	Proteobacteria	Unclassified	NP-10	0	0	567	4122	0.137555	MarDB
GCA_002684805.1	/data2/marine_genomes_and_metagenomes/genomes_The_MAR_databases/prodigal_short/MAR/Flavobacteriaceae_bacterium_CPC294_GCA_002684805.1.fas	§insdc.gca:GCA_002684805.1	§mmp.db:MMP07618946	Flavobacteriia	Flavobacteriaceae	§gtdb:GCF_000023465.1	Unclassified	Bacteria|Bacteroidota|Bacteroidia|Flavobacteriales|Flavobacteriaceae|Zunongwangia|Zunongwangia profunda	Bacteria	Flavobacteriales	Flavobacteriaceae bacterium§taxonomy:1871037	Bacteroidetes	Unclassified	CPC-294	0	0	358	3380	0.105917	MarDB
GCA_002687175.1	/data2/marine_genomes_and_metagenomes/genomes_The_MAR_databases/prodigal_short/MAR/Parcubacteria_group_bacterium_ARS52_GCA_002687175.1.fas	§insdc.gca:GCA_002687175.1	§mmp.db:MMP07619597	Unclassified	Unclassified	§gtdb:GCA_002687175.1	Unclassified	Bacteria|Patescibacteria|ABY1|Buchananbacterales|UBA6539|UBA6539|UBA6539 sp002687175	Bacteria	Unclassified	Parcubacteria group bacterium§taxonomy:2026774	Unclassified	Unclassified	ARS-52	0	0	118	1134	0.104056	MarDB
GCA_002709665.1	/data2/marine_genomes_and_metagenomes/genomes_The_MAR_databases/prodigal_short/MAR/Gemmatimonadetes_bacterium_SP138_GCA_002709665.1.fas	§insdc.gca:GCA_002709665.1	§mmp.db:MMP07619169	Unclassified	Unclassified	§gtdb:GCA_002709665.1	Unclassified	Bacteria|Latescibacterota|UBA2968|UBA2968|GCA-2709665|GCA-2709665|GCA-2709665 sp002709665	Bacteria	Unclassified	Gemmatimonadetes bacterium§taxonomy:2026742	Gemmatimonadetes	Unclassified	SP-138	0	0	609	4928	0.12358	MarDB
GCA_003645485.1	/data2/marine_genomes_and_metagenomes/genomes_The_MAR_databases/prodigal_short/MAR/Gammaproteobacteria_bacterium_B136_G9_GCA_003645485.1.fas	§insdc.gca:GCA_003645485.1	§mmp.db:MMP09215289	Gammaproteobacteria	Unclassified	0	Unclassified	Bacteria|Proteobacteria|Gammaproteobacteria|Immundisolibacterales|Immundisolibacteraceae	Bacteria	Unclassified	Gammaproteobacteria bacterium§taxonomy:1913989	Proteobacteria	Gammaproteobacteria bacterium	B136_G9	0	0	822	2373	0.346397	MarDB
GCA_002354795.1	/data2/marine_genomes_and_metagenomes/genomes_The_MAR_databases/prodigal_short/MAR/Balneolaceae_bacterium_UBA2676_GCA_002354795.1.fas	§insdc.gca:GCA_002354795.1	§mmp.db:MMP06452586	Balneolia	Balneolaceae	§gtdb:GCA_002364085.1	Unclassified	Bacteria|Bacteroidota|Rhodothermia|Balneolales|Balneolaceae|Balneola|Balneola sp002364085	Bacteria	Balneolales	Balneolaceae bacterium UBA2676§taxonomy:1951492	Balneolaeota	Unclassified	UBA2676	0	0	654	2868	0.228033	MarDB
GCA_003281955.1	/data2/marine_genomes_and_metagenomes/genomes_The_MAR_databases/prodigal_short/MAR/Prochlorococcus_sp._AG-341-L22_GCA_003281955.1.fas	§insdc.gca:GCA_003281955.1	§mmp.db:MMP08886099	Cyanobacteria (class)	Prochloraceae	0	Prochlorococcus	Bacteria|Cyanobacteria|Cyanobacteriia|Synechococcales|Cyanobiaceae|Prochlorococcus_B	Bacteria	Synechococcales	Prochlorococcus sp. AG-341-L22§taxonomy:2162226	Cyanobacteria	Prochlorococcus sp. AG-341-L22	AG-341-L22	0	0	402	627	0.641148	MarDB
GCA_003446055.1	/data2/marine_genomes_and_metagenomes/genomes_The_MAR_databases/prodigal_short/MAR/Hyphomonas_atlantica_UBA8557_GCA_003446055.1.fas	§insdc.gca:GCA_003446055.1	§mmp.db:MMP08017602	Alphaproteobacteria	Hyphomonadaceae	§gtdb:GCF_000682715.1	Hyphomonas	Bacteria|Proteobacteria|Alphaproteobacteria|Caulobacterales|Hyphomonadaceae|Hyphomonas|Hyphomonas atlantica	Bacteria	Rhodobacterales	Hyphomonas atlantica§taxonomy:1280948	Proteobacteria	Hyphomonas atlantica	UBA8557	0	0	773	2799	0.27617	MarDB
GCA_002457235.1	/data2/marine_genomes_and_metagenomes/genomes_The_MAR_databases/prodigal_short/MAR/Puniceicoccaceae_bacterium_MED-G32_GCA_002457235.1.fas	§insdc.gca:GCA_002457235.1	§mmp.db:MMP06890643	Opitutae	Puniceicoccaceae	§gtdb:GCA_002457235.1	Unclassified	Bacteria|Verrucomicrobiota|Verrucomicrobiae|Opitutales|Puniceicoccaceae|GCA-2690565|GCA-2690565 sp002457235	Bacteria	Puniceicoccales	Puniceicoccaceae bacterium MED-G32§taxonomy:1986246	Verrucomicrobia	Unclassified	MED-G32	0	0	250	667	0.374813	MarDB
GCA_003214085.1	/data2/marine_genomes_and_metagenomes/genomes_The_MAR_databases/prodigal_short/MAR/Prochlorococcus_sp._AG-418-J17_GCA_003214085.1.fas	§insdc.gca:GCA_003214085.1	§mmp.db:MMP08886416	Cyanobacteria (class)	Prochloraceae	§gtdb:GCA_003214085.1	Prochlorococcus	Bacteria|Cyanobacteria|Cyanobacteriia|Synechococcales|Cyanobiaceae|Prochlorococcus_A|Prochlorococcus_A sp003214085	Bacteria	Synechococcales	Prochlorococcus sp. AG-418-J17§taxonomy:2162282	Cyanobacteria	Prochlorococcus sp. AG-418-J17	AG-418-J17	0	0	529	1710	0.309357	MarDB
GCA_002701385.1	/data2/marine_genomes_and_metagenomes/genomes_The_MAR_databases/prodigal_short/MAR/Rhodopirellula_sp._NAT69_GCA_002701385.1.fas	§insdc.gca:GCA_002701385.1	§mmp.db:MMP07619947	Planctomycetia	Planctomycetaceae	§gtdb:GCA_002701385.1	Rhodopirellula	Bacteria|Planctomycetota|Planctomycetes|Pirellulales|Pirellulaceae|UBA721|UBA721 sp002701385	Bacteria	Planctomycetales	Rhodopirellula sp.§taxonomy:2024855	Planctomycetes	Unclassified	NAT-69	0	0	1324	3762	0.35194	MarDB
GCA_003282945.1	/data2/marine_genomes_and_metagenomes/genomes_The_MAR_databases/prodigal_short/MAR/Pelagibacteraceae_bacterium_AG-325-E23_GCA_003282945.1.fas	§insdc.gca:GCA_003282945.1	§mmp.db:MMP08886039	Alphaproteobacteria	Pelagibacteraceae	§gtdb:GCA_003282945.1	Unclassified	Bacteria|Proteobacteria|Alphaproteobacteria|Pelagibacterales|Pelagibacteraceae|Pelagibacter|Pelagibacter sp003282945	Bacteria	Pelagibacterales	Pelagibacteraceae bacterium AG-325-E23§taxonomy:2162025	Proteobacteria	Pelagibacteraceae bacterium AG-325-E23	AG-325-E23	0	0	180	1249	0.144115	MarDB
GCA_002748445.1	/data2/marine_genomes_and_metagenomes/genomes_The_MAR_databases/prodigal_short/MAR/candidate_division_KSB3_bacterium_DOLJORAL78_47_16_GCA_002748445.1.fas	§insdc.gca:GCA_002748445.1	§mmp.db:MMP07757483	Unclassified	Unclassified	0	Unclassified	Bacteria|Moduliflexota|Moduliflexia|Moduliflexales|Moduliflexaceae|GCA-2748425	Bacteria	Unclassified	Candidate division KSB3 bacterium§taxonomy:2044937	Unclassified	Unclassified	DOLJORAL78_47_16	0	0	1327	3907	0.339647	MarDB
GCA_000153445.1	/data2/marine_genomes_and_metagenomes/genomes_The_MAR_databases/prodigal_short/MAR/gamma_proteobacterium_HTCC2207_GCA_000153445.1.fas	#N/A	#N/A	Gammaproteobacteria	Porticoccaceae	#N/A	0	#N/A	Bacteria	Cellvibrionales	#N/A	Proteobacteria	#N/A	#N/A	#N/A	#N/A	417	2355	0.17707
GCA_003487785.1	/data2/marine_genomes_and_metagenomes/genomes_The_MAR_databases/prodigal_short/MAR/Cryomorphaceae_bacterium_UBA11746_GCA_003487785.1.fas	§insdc.gca:GCA_003487785.1	§mmp.db:MMP08018590	Flavobacteriia	Cryomorphaceae	§gtdb:GCA_003487785.1	Unclassified	Bacteria|Bacteroidota|Bacteroidia|Flavobacteriales|Cryomorphaceae|UBA10364|UBA10364 sp003487785	Bacteria	Flavobacteriales	Cryomorphaceae bacterium§taxonomy:1898111	Bacteroidetes	Cryomorphaceae bacterium	UBA11746	0	0	867	1535	0.564821	MarDB
GCA_002897755.1	/data2/marine_genomes_and_metagenomes/genomes_The_MAR_databases/prodigal_short/MAR/bacterium_BMS3Abin10_BMS3Abin10_GCA_002897755.1.fas	§insdc.gca:GCA_002897755.1	§mmp.db:MMP00081370	Unclassified	Unclassified	§gtdb:GCA_002897775.1	Unclassified	Bacteria|Nitrospirota|Thermodesulfovibrionia|UBA6902|UBA6902|BMS3Bbin08|BMS3Bbin08 sp002897775	Bacteria	Unclassified	Bacterium BMS3Abin10§taxonomy:2005718	Unclassified	bacterium BMS3Abin10	BMS3Abin10	0	0	916	2593	0.353259	MarDB
GCA_003283315.1	/data2/marine_genomes_and_metagenomes/genomes_The_MAR_databases/prodigal_short/MAR/Prochlorococcus_sp._AG-321-K06_GCA_003283315.1.fas	§insdc.gca:GCA_003283315.1	§mmp.db:MMP08886013	Cyanobacteria (class)	Prochloraceae	§gtdb:GCA_003283415.1	Prochlorococcus	Bacteria|Cyanobacteria|Cyanobacteriia|Synechococcales|Cyanobiaceae|Prochlorococcus_A|Prochlorococcus_A sp003283415	Bacteria	Synechococcales	Prochlorococcus sp. AG-321-K06§taxonomy:2162403	Cyanobacteria	Prochlorococcus sp. AG-321-K06	AG-321-K06	0	0	108	191	0.565445	MarDB
GCA_003648675.1	/data2/marine_genomes_and_metagenomes/genomes_The_MAR_databases/prodigal_short/MAR/Aquificae_bacterium_B14_G1_GCA_003648675.1.fas	§insdc.gca:GCA_003648675.1	§mmp.db:MMP09214768	Unclassified	Unclassified	0	Unclassified	Bacteria|Thermosulfidibacterota|Thermosulfidibacteria|Thermosulfidibacterales	Bacteria	Unclassified	Aquificae bacterium§taxonomy:2202151	Aquificae	Aquificae bacterium	B14_G1	0	0	356	1497	0.237809	MarDB
GCA_002713045.1	/data2/marine_genomes_and_metagenomes/genomes_The_MAR_databases/prodigal_short/MAR/bacterium_SAT1446_GCA_002713045.1.fas	§insdc.gca:GCA_002713045.1	§mmp.db:MMP07618393	Unclassified	Unclassified	§gtdb:GCA_002433595.1	Unclassified	Bacteria|Margulisbacteria|ZB3|UBA6595|UBA6595|UBA6595|UBA6595 sp002433595	Bacteria	Unclassified	Bacterium§taxonomy:1869227	Unclassified	Unclassified	SAT-1446	0	0	579	1050	0.551429	MarDB
GCA_003250135.1	/data2/marine_genomes_and_metagenomes/genomes_The_MAR_databases/prodigal_short/MAR/Rhodobacteraceae_bacterium_SZUA-547_GCA_003250135.1.fas	§insdc.gca:GCA_003250135.1	§mmp.db:MMP09288095	Alphaproteobacteria	Rhodobacteraceae	§gtdb:GCA_003250135.1	Unclassified	Bacteria|Proteobacteria|Alphaproteobacteria|Rhodobacterales|Rhodobacteraceae|SZUA-547|SZUA-547 sp003250135	Bacteria	Rhodobacterales	Rhodobacteraceae bacterium§taxonomy:1904441	Proteobacteria	Rhodobacteraceae bacterium	SZUA-547	0	0	505	2096	0.240935	MarDB
GCA_002430105.1	/data2/marine_genomes_and_metagenomes/genomes_The_MAR_databases/prodigal_short/MAR/Gammaproteobacteria_bacterium_UBA5973_GCA_002430105.1.fas	§insdc.gca:GCA_002430105.1	§mmp.db:MMP06457630	Gammaproteobacteria	Unclassified	§gtdb:GCA_001438145.1	Unclassified	Bacteria|Proteobacteria|Gammaproteobacteria|Pseudomonadales|Pseudohongiellaceae|OM182|OM182 sp001438145	Bacteria	Unclassified	Gammaproteobacteria bacterium UBA5973§taxonomy:1948634	Proteobacteria	Unclassified	UBA5973	0	0	468	2099	0.222963	MarDB
GCA_002337635.1	/data2/marine_genomes_and_metagenomes/genomes_The_MAR_databases/prodigal_short/MAR/Rhodobiaceae_bacterium_UBA1906_GCA_002337635.1.fas	§insdc.gca:GCA_002337635.1	§mmp.db:MMP06450545	Alphaproteobacteria	Rhodobiaceae	§gtdb:GCA_002715765.1	Unclassified	Bacteria|Proteobacteria|Alphaproteobacteria|Parvibaculales|Parvibaculaceae|Mf105b01|Mf105b01 sp002715765	Bacteria	Rhizobiales	Rhodobiaceae bacterium UBA1906§taxonomy:1952822	Proteobacteria	Unclassified	UBA1906	0	0	504	3214	0.156814	MarDB
GCA_003250375.1	/data2/marine_genomes_and_metagenomes/genomes_The_MAR_databases/prodigal_short/MAR/Candidatus_Shapirobacteria_bacterium_SZUA-533_GCA_003250375.1.fas	§insdc.gca:GCA_003250375.1	§mmp.db:MMP09288081	Unclassified	Unclassified	§gtdb:GCA_003250375.1	Unclassified	Bacteria|Patescibacteria|Microgenomatia|Shapirobacterales|UBA12405|SZUA-533|SZUA-533 sp003250375	Bacteria	Unclassified	Candidatus Shapirobacteria bacterium§taxonomy:2053613	Candidatus Shapirobacteria	Candidatus Shapirobacteria bacterium	SZUA-533	0	0	111	1001	0.110889	MarDB
GCA_003279495.1	/data2/marine_genomes_and_metagenomes/genomes_The_MAR_databases/prodigal_short/MAR/Prochlorococcus_sp._AG-402-G08_GCA_003279495.1.fas	§insdc.gca:GCA_003279495.1	§mmp.db:MMP08886303	Cyanobacteria (class)	Prochloraceae	§gtdb:GCF_000012465.1	Prochlorococcus	Bacteria|Cyanobacteria|Cyanobacteriia|Synechococcales|Cyanobiaceae|Prochlorococcus_B|Prochlorococcus_B marinus_B	Bacteria	Synechococcales	Prochlorococcus sp. AG-402-G08§taxonomy:2162259	Cyanobacteria	Prochlorococcus sp. AG-402-G08	AG-402-G08	0	0	1859	1934	0.96122	MarDB
GCA_002937695.1	/data2/marine_genomes_and_metagenomes/genomes_The_MAR_databases/prodigal_short/MAR/Alphaproteobacteria_bacterium_MarineAlpha9_Bin2_GCA_002937695.1.fas	§insdc.gca:GCA_002937695.1	§mmp.db:MMP07286224	Alphaproteobacteria	Unclassified	§gtdb:GCA_002937675.1	Unclassified	Bacteria|Proteobacteria|Alphaproteobacteria|TMED109|TMED109|MarineAlpha9-Bin2|MarineAlpha9-Bin2 sp002937675	Bacteria	Unclassified	Alphaproteobacteria bacterium MarineAlpha9_Bin2§taxonomy:2013097	Proteobacteria	Alphaproteobacteria bacterium MarineAlpha9_Bin2	MarineAlpha9_Bin2	0	0	504	1486	0.339166	MarDB
GCA_002708475.1	/data2/marine_genomes_and_metagenomes/genomes_The_MAR_databases/prodigal_short/MAR/Oleispira_sp._SAT217_GCA_002708475.1.fas	§insdc.gca:GCA_002708475.1	§mmp.db:MMP07619558	Gammaproteobacteria	Oceanospirillaceae	§gtdb:GCA_002708475.1	Oleispira	Bacteria|Proteobacteria|Gammaproteobacteria|Pseudomonadales|Saccharospirillaceae|Oleispira|Oleispira sp002708475	Bacteria	Oceanospirillales	Oleispira sp.§taxonomy:2024846	Proteobacteria	Unclassified	SAT-217	0	0	485	2439	0.198852	MarDB
GCA_002693505.1	/data2/marine_genomes_and_metagenomes/genomes_The_MAR_databases/prodigal_short/MAR/Hyphomonadaceae_bacterium_EAC632_GCA_002693505.1.fas	§insdc.gca:GCA_002693505.1	§mmp.db:MMP07619236	Alphaproteobacteria	Hyphomonadaceae	§gtdb:GCF_000682775.1	Unclassified	Bacteria|Proteobacteria|Alphaproteobacteria|Caulobacterales|Hyphomonadaceae|Hyphomonas|Hyphomonas sp000682775	Bacteria	Rhodobacterales	Hyphomonadaceae bacterium§taxonomy:2026748	Proteobacteria	Unclassified	EAC-632	0	0	568	3441	0.165068	MarDB
GCA_002352365.1	/data2/marine_genomes_and_metagenomes/genomes_The_MAR_databases/prodigal_short/MAR/Dehalococcoidia_bacterium_UBA2777_GCA_002352365.1.fas	§insdc.gca:GCA_002352365.1	§mmp.db:MMP06451507	Dehalococcoidia	Unclassified	§gtdb:GCA_002352365.1	Unclassified	Bacteria|Chloroflexota|Dehalococcoidia|UBA2777|UBA2777|UBA2777|UBA2777 sp002352365	Bacteria	Unclassified	Dehalococcoidia bacterium UBA2777§taxonomy:1948487	Chloroflexi	Unclassified	UBA2777	0	0	353	2012	0.175447	MarDB
GCA_002708265.1	/data2/marine_genomes_and_metagenomes/genomes_The_MAR_databases/prodigal_short/MAR/Legionellales_bacterium_SAT2787_GCA_002708265.1.fas	§insdc.gca:GCA_002708265.1	§mmp.db:MMP07619292	Gammaproteobacteria	Unclassified	§gtdb:GCA_002708265.1	Unclassified	Bacteria|Proteobacteria|Gammaproteobacteria|Berkiellales|GCA-2708265|GCA-2708265|GCA-2708265 sp002708265	Bacteria	Legionellales	Legionellales bacterium§taxonomy:2026754	Proteobacteria	Unclassified	SAT-2787	0	0	187	1535	0.121824	MarDB
GCA_003525485.1	/data2/marine_genomes_and_metagenomes/genomes_The_MAR_databases/prodigal_short/MAR/Cryomorphaceae_bacterium_UBA11676_GCA_003525485.1.fas	§insdc.gca:GCA_003525485.1	§mmp.db:MMP08020390	Flavobacteriia	Cryomorphaceae	§gtdb:GCA_002695025.1	Unclassified	Bacteria|Bacteroidota|Bacteroidia|Flavobacteriales|Cryomorphaceae|Owenweeksia|Owenweeksia sp002695025	Bacteria	Flavobacteriales	Cryomorphaceae bacterium§taxonomy:1898111	Bacteroidetes	Cryomorphaceae bacterium	UBA11676	0	0	1408	3088	0.455959	MarDB
GCA_003283075.1	/data2/marine_genomes_and_metagenomes/genomes_The_MAR_databases/prodigal_short/MAR/bacterium_AG-323-O19_AG-323-O19_GCA_003283075.1.fas	§insdc.gca:GCA_003283075.1	§mmp.db:MMP08886032	Unclassified	Unclassified	0	Unclassified	0	Bacteria	Unclassified	Bacterium AG-323-O19§taxonomy:2161908	Unclassified	bacterium AG-323-O19	AG-323-O19	0	0	175	190	0.921053	MarDB
GCA_002747265.1	/data2/marine_genomes_and_metagenomes/genomes_The_MAR_databases/prodigal_short/MAR/Thiotrichales_bacterium_DOLZORAL124_39_15_GCA_002747265.1.fas	§insdc.gca:GCA_002747265.1	§mmp.db:MMP07757615	Gammaproteobacteria	Unclassified	0	Unclassified	Bacteria|Proteobacteria|Gammaproteobacteria|Thiotrichales|Thiotrichaceae	Bacteria	Thiotrichales	Thiotrichales bacterium§taxonomy:2026796	Proteobacteria	Unclassified	DOLZORAL124_39_15	0	0	128	367	0.348774	MarDB
GCA_000634735.1	/data2/marine_genomes_and_metagenomes/genomes_The_MAR_databases/prodigal_short/MAR/Prochlorococcus_sp._scB241_528N17_GCA_000634735.1.fas	§insdc.gca:GCA_000634735.1	§mmp.db:MMP02671327	Cyanobacteria (class)	Prochloraceae	§gtdb:GCA_000634735.1	Prochlorococcus	Bacteria|Cyanobacteria|Cyanobacteriia|Synechococcales|Cyanobiaceae|Prochlorococcus_A|Prochlorococcus_A sp000634735	Bacteria	Synechococcales	Prochlorococcus sp. scB241_528N17§taxonomy:1471456	Cyanobacteria	Unclassified	scB241_528N17	0	0	636	1867	0.340653	MarDB
GCA_003973595.1	/data2/marine_genomes_and_metagenomes/genomes_The_MAR_databases/prodigal_short/MAR/Flavobacteriia_bacterium_MAG_92_GCA_003973595.1.fas	§insdc.gca:GCA_003973595.1	§mmp.db:MMP09407841	Flavobacteriia	Unclassified	0	Unclassified	Bacteria|Bacteroidota|Bacteroidia|Flavobacteriales|Flavobacteriaceae|Muricauda	Bacteria	Unclassified	Flavobacteriia bacterium§taxonomy:2044941	Bacteroidetes	Flavobacteriia bacterium	MAG 92	0	0	960	3731	0.257304	MarDB
GCA_002401495.1	/data2/marine_genomes_and_metagenomes/genomes_The_MAR_databases/prodigal_short/MAR/Candidatus_Kaiserbacteria_bacterium_NORP121_GCA_002401495.1.fas	§insdc.gca:GCA_002401495.1	§mmp.db:MMP07568935	Unclassified	Unclassified	§gtdb:GCA_002401495.1	Unclassified	Bacteria|Patescibacteria|Paceibacteria|UBA9983_A|UBA2163|UBA2100|UBA2100 sp002401495	Bacteria	Unclassified	Candidatus Kaiserbacteria bacterium§taxonomy:2030810	Candidatus Kaiserbacteria	Unclassified	NORP121	0	0	888	1308	0.678899	MarDB
GCA_002401865.1	/data2/marine_genomes_and_metagenomes/genomes_The_MAR_databases/prodigal_short/MAR/Candidatus_Aerophobetes_bacterium_NORP91_GCA_002401865.1.fas	§insdc.gca:GCA_002401865.1	§mmp.db:MMP07568905	Unclassified	Unclassified	§gtdb:GCA_002401865.1	Unclassified	Bacteria|Verrucomicrobiota_A|Chlamydiia|Parachlamydiales|Simkaniaceae|GCA-2401865|GCA-2401865 sp002401865	Bacteria	Unclassified	Candidatus Aerophobetes bacterium§taxonomy:2030807	Unclassified	Unclassified	NORP91	0	0	342	1231	0.277823	MarDB
GCA_002692225.1	/data2/marine_genomes_and_metagenomes/genomes_The_MAR_databases/prodigal_short/MAR/Rhodospirillaceae_bacterium_MED1257_GCA_002692225.1.fas	§insdc.gca:GCA_002692225.1	§mmp.db:MMP07620007	Alphaproteobacteria	Rhodospirillaceae	§gtdb:GCA_002471575.1	Unclassified	Bacteria|Proteobacteria|Alphaproteobacteria|Defluviicoccales|UBA830|UBA830|UBA830 sp002471575	Bacteria	Rhodospirillales	Rhodospirillaceae bacterium§taxonomy:1898112	Proteobacteria	Unclassified	MED-1257	0	0	619	2138	0.289523	MarDB
GCA_002477545.1	/data2/marine_genomes_and_metagenomes/genomes_The_MAR_databases/prodigal_short/MAR/Patescibacteria_group_bacterium_UBA7435_GCA_002477545.1.fas	§insdc.gca:GCA_002477545.1	§mmp.db:MMP06453934	Unclassified	Unclassified	§gtdb:GCA_002477545.1	Unclassified	Bacteria|Patescibacteria|Paceibacteria|UBA9983_A|UBA2163|OLB19|OLB19 sp002477545	Bacteria	Unclassified	Patescibacteria group bacterium UBA7435§taxonomy:1948864	Unclassified	Unclassified	UBA7435	0	0	115	888	0.129505	MarDB
GCA_002363755.1	/data2/marine_genomes_and_metagenomes/genomes_The_MAR_databases/prodigal_short/MAR/Alphaproteobacteria_bacterium_UBA3205_GCA_002363755.1.fas	§insdc.gca:GCA_002363755.1	§mmp.db:MMP06454294	Alphaproteobacteria	Unclassified	§gtdb:GCA_002706985.1	Unclassified	Bacteria|Proteobacteria|Alphaproteobacteria|Sneathiellales|Sneathiellaceae|Sneathiella|Sneathiella sp002706985	Bacteria	Unclassified	Alphaproteobacteria bacterium UBA3205§taxonomy:1948382	Proteobacteria	Unclassified	UBA3205	0	0	694	3382	0.205204	MarDB
GCA_002725365.1	/data2/marine_genomes_and_metagenomes/genomes_The_MAR_databases/prodigal_short/MAR/Chloroflexi_bacterium_RS381_GCA_002725365.1.fas	§insdc.gca:GCA_002725365.1	§mmp.db:MMP07618474	Unclassified	Unclassified	§gtdb:GCA_002725365.1	Unclassified	Bacteria|Chloroflexota|Dehalococcoidia|UBA2979|UBA2979|UBA2979|UBA2979 sp002725365	Bacteria	Unclassified	Chloroflexi bacterium§taxonomy:2026724	Chloroflexi	Unclassified	RS-381	0	0	313	1509	0.207422	MarDB
GCA_003647025.1	/data2/marine_genomes_and_metagenomes/genomes_The_MAR_databases/prodigal_short/MAR/Deltaproteobacteria_bacterium_B9_G4_GCA_003647025.1.fas	§insdc.gca:GCA_003647025.1	§mmp.db:MMP09215106	Deltaproteobacteria	Unclassified	0	Unclassified	Bacteria|Myxococcota|Polyangia|Polyangiales|SG8-38|SG8-38	Bacteria	Unclassified	Deltaproteobacteria bacterium§taxonomy:2026735	Proteobacteria	Deltaproteobacteria bacterium	B9_G4	0	0	1045	3096	0.337532	MarDB
GCA_002727435.1	/data2/marine_genomes_and_metagenomes/genomes_The_MAR_databases/prodigal_short/MAR/Chloroflexi_bacterium_RS659_GCA_002727435.1.fas	§insdc.gca:GCA_002727435.1	§mmp.db:MMP07618482	Unclassified	Unclassified	§gtdb:GCA_002727435.1	Unclassified	Bacteria|Chloroflexota|Dehalococcoidia|UBA1151|TMED-70|GCA-002700125|GCA-002700125 sp002727435	Bacteria	Unclassified	Chloroflexi bacterium§taxonomy:2026724	Chloroflexi	Unclassified	RS-659	0	0	386	713	0.541374	MarDB
GCA_003212995.1	/data2/marine_genomes_and_metagenomes/genomes_The_MAR_databases/prodigal_short/MAR/OCS155_cluster_bacterium_AG-430-M19_GCA_003212995.1.fas	§insdc.gca:GCA_003212995.1	§mmp.db:MMP08886476	Actinobacteria	Unclassified	§gtdb:GCA_003213165.1	Unclassified	Bacteria|Actinobacteriota|Acidimicrobiia|TMED189|TMED189|TMED189|TMED189 sp003213165	Bacteria	Unclassified	OCS155 cluster bacterium AG-430-M19§taxonomy:2162611	Actinobacteria	OCS155 cluster bacterium AG-430-M19	AG-430-M19	0	0	541	950	0.569474	MarDB
GCA_003497735.1	/data2/marine_genomes_and_metagenomes/genomes_The_MAR_databases/prodigal_short/MAR/Alphaproteobacteria_bacterium_UBA8292_GCA_003497735.1.fas	§insdc.gca:GCA_003497735.1	§mmp.db:MMP08018610	Alphaproteobacteria	Unclassified	§gtdb:GCA_002457765.1	Unclassified	Bacteria|Proteobacteria|Alphaproteobacteria|Puniceispirillales|Puniceispirillaceae|UBA8309|UBA8309 sp002457765	Bacteria	Unclassified	Alphaproteobacteria bacterium§taxonomy:1913988	Proteobacteria	Alphaproteobacteria bacterium	UBA8292	0	0	637	2428	0.262356	MarDB
GCA_001632145.1	/data2/marine_genomes_and_metagenomes/genomes_The_MAR_databases/prodigal_short/MAR/Prochlorococcus_marinus_str._MIT_1342_GCA_001632145.1.fas	#N/A	#N/A	0	Prochlorococcaceae	#N/A	Prochlorococcus	#N/A	Bacteria	Synechococcales	#N/A	Cyanobacteria	#N/A	#N/A	#N/A	#N/A	2668	2668	1
GCA_002360765.1	/data2/marine_genomes_and_metagenomes/genomes_The_MAR_databases/prodigal_short/MAR/Pseudoalteromonas_lipolytica_UBA3348_GCA_002360765.1.fas	§insdc.gca:GCA_002360765.1	§mmp.db:MMP06451346	Gammaproteobacteria	Pseudoalteromonadaceae	§gtdb:GCA_002436365.1	Pseudoalteromonas	Bacteria|Proteobacteria|Gammaproteobacteria|Enterobacterales|Alteromonadaceae|Pseudoalteromonas|Pseudoalteromonas lipolytica_C	Bacteria	Alteromonadales	Pseudoalteromonas lipolytica§taxonomy:570156	Proteobacteria	Unclassified	UBA3348	0	0	819	4142	0.197731	MarDB
GCA_001310515.1	/data2/marine_genomes_and_metagenomes/genomes_The_MAR_databases/prodigal_short/MAR/Bacillus_sp._JCM_19056_GCA_001310515.1.fas	§insdc.gca:GCA_001310515.1	§mmp.db:MMP00000387	Bacilli	Bacillaceae	§gtdb:GCA_001310515.1	Bacillus	Bacteria|Firmicutes|Bacilli|Bacillales|Amphibacillaceae|JCM-19056|JCM-19056 sp001310515	Bacteria	Bacillales	Bacillus sp. JCM 19056§taxonomy:1460650	Firmicutes	Unclassified	JCM 19056	0	0	1453	4682	0.310337	MarDB
GCA_003526145.1	/data2/marine_genomes_and_metagenomes/genomes_The_MAR_databases/prodigal_short/MAR/Gimesia_maris_UBA9375_GCA_003526145.1.fas	§insdc.gca:GCA_003526145.1	§mmp.db:MMP08020302	Planctomycetia	Planctomycetaceae	§gtdb:GCF_000181475.1	Gimesia	Bacteria|Planctomycetota|Planctomycetes|Planctomycetales|Planctomycetaceae|Gimesia|Gimesia maris	Bacteria	Planctomycetales	Gimesia maris§taxonomy:122	Planctomycetes	Gimesia maris	UBA9375	0	0	1838	6773	0.271372	MarDB
GCA_001439055.1	/data2/marine_genomes_and_metagenomes/genomes_The_MAR_databases/prodigal_short/MAR/OM182_bacterium_BACL3_MAG-120507-bin80_BACL4_MAG-120507-bin80_GCA_001439055.1.fas	§insdc.gca:GCA_001439055.1	§mmp.db:MMP03741962	Gammaproteobacteria	Unclassified	§gtdb:GCA_001438145.1	Unclassified	Bacteria|Proteobacteria|Gammaproteobacteria|Pseudomonadales|Pseudohongiellaceae|OM182|OM182 sp001438145	Bacteria	Unclassified	OM182 bacterium BACL3 MAG-120507-bin80§taxonomy:1655577	Proteobacteria	Unclassified	BACL4 MAG120507bin80	0	0	897	2724	0.329295	MarDB
GCA_002729675.1	/data2/marine_genomes_and_metagenomes/genomes_The_MAR_databases/prodigal_short/MAR/Idiomarina_sp._NP27_GCA_002729675.1.fas	§insdc.gca:GCA_002729675.1	§mmp.db:MMP07619256	Gammaproteobacteria	Idiomarinaceae	§gtdb:GCA_002729675.1	Idiomarina	Bacteria|Proteobacteria|Gammaproteobacteria|Enterobacterales|Alteromonadaceae|Idiomarina|Idiomarina sp002729675	Bacteria	Alteromonadales	Idiomarina sp.§taxonomy:1874361	Proteobacteria	Unclassified	NP-27	0	0	450	3057	0.147203	MarDB
GCA_003446155.1	/data2/marine_genomes_and_metagenomes/genomes_The_MAR_databases/prodigal_short/MAR/Flavobacteriaceae_bacterium_UBA11331_GCA_003446155.1.fas	§insdc.gca:GCA_003446155.1	§mmp.db:MMP08017596	Flavobacteriia	Flavobacteriaceae	§gtdb:GCF_000173115.1	Unclassified	Bacteria|Bacteroidota|Bacteroidia|Flavobacteriales|Flavobacteriaceae|MAG-120531|MAG-120531 sp000173115	Bacteria	Flavobacteriales	Flavobacteriaceae bacterium§taxonomy:1871037	Bacteroidetes	Flavobacteriaceae bacterium	UBA11331	0	0	419	1514	0.27675	MarDB
GCA_002720695.1	/data2/marine_genomes_and_metagenomes/genomes_The_MAR_databases/prodigal_short/MAR/Gemmatimonadetes_bacterium_SP296_GCA_002720695.1.fas	§insdc.gca:GCA_002720695.1	§mmp.db:MMP07619170	Unclassified	Unclassified	§gtdb:GCA_002433075.1	Unclassified	Bacteria|Latescibacterota|UBA2968|UBA2968|UBA2968|UBA6620|UBA6620 sp002433075	Bacteria	Unclassified	Gemmatimonadetes bacterium§taxonomy:2026742	Gemmatimonadetes	Unclassified	SP-296	0	0	876	3622	0.241855	MarDB
GCA_002352865.1	/data2/marine_genomes_and_metagenomes/genomes_The_MAR_databases/prodigal_short/MAR/Aequorivita_sp._UBA1901_GCA_002352865.1.fas	§insdc.gca:GCA_002352865.1	§mmp.db:MMP06450550	Flavobacteriia	Flavobacteriaceae	§gtdb:GCA_002364215.1	Aequorivita	Bacteria|Bacteroidota|Bacteroidia|Flavobacteriales|Flavobacteriaceae|Aequorivita|Aequorivita sp002364215	Bacteria	Flavobacteriales	Aequorivita sp. UBA1901§taxonomy:1947771	Bacteroidetes	Unclassified	UBA1901	0	0	367	3084	0.119001	MarDB
GCA_002749035.1	/data2/marine_genomes_and_metagenomes/genomes_The_MAR_databases/prodigal_short/MAR/Cardiobacteriales_bacterium_DOLJORAL78_42_5_GCA_002749035.1.fas	§insdc.gca:GCA_002749035.1	§mmp.db:MMP07757437	Gammaproteobacteria	Unclassified	0	Unclassified	Bacteria|Proteobacteria|Gammaproteobacteria|Cardiobacteriales|Cardiobacteriaceae|Rappaport	Bacteria	Cardiobacteriales	Cardiobacteriales bacterium§taxonomy:2044593	Proteobacteria	Unclassified	DOLJORAL78_42_5	0	0	125	310	0.403226	MarDB
GCA_002727395.1	/data2/marine_genomes_and_metagenomes/genomes_The_MAR_databases/prodigal_short/MAR/Rhodospirillales_bacterium_RS665_GCA_002727395.1.fas	§insdc.gca:GCA_002727395.1	§mmp.db:MMP07620027	Alphaproteobacteria	Unclassified	§gtdb:GCA_002727395.1	Unclassified	Bacteria|Proteobacteria|Alphaproteobacteria|Defluviicoccales|UBA2964|UBA2964|UBA2964 sp002727395	Bacteria	Rhodospirillales	Rhodospirillales bacterium§taxonomy:2026786	Proteobacteria	Unclassified	RS-665	0	0	585	1536	0.380859	MarDB
GCA_002354605.1	/data2/marine_genomes_and_metagenomes/genomes_The_MAR_databases/prodigal_short/MAR/Alcanivorax_sp._UBA2685_GCA_002354605.1.fas	§insdc.gca:GCA_002354605.1	§mmp.db:MMP06453896	Gammaproteobacteria	Alcanivoracaceae	§gtdb:GCA_002354605.1	Alcanivorax	Bacteria|Proteobacteria|Gammaproteobacteria|Pseudomonadales|Alcanivoracaceae|Alcanivorax|Alcanivorax sp002354605	Bacteria	Oceanospirillales	Alcanivorax sp. UBA2685§taxonomy:1945978	Proteobacteria	Unclassified	UBA2685	0	0	423	3204	0.132022	MarDB
GCA_002696735.1	/data2/marine_genomes_and_metagenomes/genomes_The_MAR_databases/prodigal_short/MAR/Methylophaga_sp._EAC20_GCA_002696735.1.fas	§insdc.gca:GCA_002696735.1	§mmp.db:MMP07619461	Gammaproteobacteria	Piscirickettsiaceae	§gtdb:GCA_002696735.1	Methylophaga	Bacteria|Proteobacteria|Gammaproteobacteria|Nitrosococcales|Methylophagaceae|Methylophaga|Methylophaga sp002696735	Bacteria	Thiotrichales	Methylophaga sp.§taxonomy:2024840	Proteobacteria	Unclassified	EAC-20	0	0	591	3186	0.185499	MarDB
GCA_001044505.1	/data2/marine_genomes_and_metagenomes/genomes_The_MAR_databases/prodigal_short/MAR/Candidatus_Nitromaritima_sp._SCGC_AAA799-A02_SCGC_AAA799_A02_GCA_001044505.1.fas	§insdc.gca:GCA_001044505.1	§mmp.db:MMP03375752	Nitrospinia	Nitrospinaceae	0	Nitrospina	Bacteria|Nitrospinota|Nitrospinia|Nitrospinales|Nitrospinaceae	Bacteria	Nitrospinales	Nitrospina sp. SCGC_AAA799_A02§taxonomy:1628278	Nitrospinae	Unclassified	SCGC_AAA799_A02	0	0	504	1379	0.365482	MarDB
GCA_002696585.1	/data2/marine_genomes_and_metagenomes/genomes_The_MAR_databases/prodigal_short/MAR/Rhodobiaceae_bacterium_EAC2107_GCA_002696585.1.fas	§insdc.gca:GCA_002696585.1	§mmp.db:MMP07619919	Alphaproteobacteria	Rhodobiaceae	0	Unclassified	Bacteria|Proteobacteria|Alphaproteobacteria|Rhizobiales|TMED25|TMED25	Bacteria	Rhizobiales	Rhodobiaceae bacterium§taxonomy:2026785	Proteobacteria	Unclassified	EAC-2107	0	0	412	955	0.431414	MarDB
GCA_003645045.1	/data2/marine_genomes_and_metagenomes/genomes_The_MAR_databases/prodigal_short/MAR/bacterium_B10_G15_GCA_003645045.1.fas	§insdc.gca:GCA_003645045.1	§mmp.db:MMP09214868	Unclassified	Unclassified	0	Unclassified	Bacteria|WOR-3_B|UBA3072	Bacteria	Unclassified	Bacterium§taxonomy:1869227	Unclassified	bacterium	B10_G15	0	0	572	1565	0.365495	MarDB
GCA_003211955.1	/data2/marine_genomes_and_metagenomes/genomes_The_MAR_databases/prodigal_short/MAR/Prochlorococcus_sp._AG-459-O09_GCA_003211955.1.fas	§insdc.gca:GCA_003211955.1	§mmp.db:MMP08886552	Cyanobacteria (class)	Prochloraceae	§gtdb:GCA_003211955.1	Prochlorococcus	Bacteria|Cyanobacteria|Cyanobacteriia|Synechococcales|Cyanobiaceae|Prochlorococcus_A|Prochlorococcus_A sp003211955	Bacteria	Synechococcales	Prochlorococcus sp. AG-459-O09§taxonomy:2162336	Cyanobacteria	Prochlorococcus sp. AG-459-O09	AG-459-O09	0	0	513	1439	0.356498	MarDB
GCA_002719595.1	/data2/marine_genomes_and_metagenomes/genomes_The_MAR_databases/prodigal_short/MAR/Verrucomicrobiales_bacterium_SP324_GCA_002719595.1.fas	§insdc.gca:GCA_002719595.1	§mmp.db:MMP07620223	Verrucomicrobiae	Unclassified	§gtdb:GCA_002719595.1	Unclassified	Bacteria|Verrucomicrobiota|Verrucomicrobiae|Pedosphaerales|UBA1100|UBA1100|UBA1100 sp002719595	Bacteria	Verrucomicrobiales	Verrucomicrobiales bacterium§taxonomy:2026801	Verrucomicrobia	Unclassified	SP-324	0	0	1707	1707	1	MarDB
GCA_002722385.1	/data2/marine_genomes_and_metagenomes/genomes_The_MAR_databases/prodigal_short/MAR/SAR116_cluster_bacterium_SP233_GCA_002722385.1.fas	§insdc.gca:GCA_002722385.1	§mmp.db:MMP07620097	Alphaproteobacteria	Unclassified	§gtdb:GCA_002722385.1	Unclassified	Bacteria|Proteobacteria|Alphaproteobacteria|Puniceispirillales|Puniceispirillaceae|HIMB100|HIMB100 sp002722385	Bacteria	Unclassified	SAR116 cluster bacterium§taxonomy:2024888	Proteobacteria	Unclassified	SP-233	0	0	189	985	0.191878	MarDB
GCA_003245785.1	/data2/marine_genomes_and_metagenomes/genomes_The_MAR_databases/prodigal_short/MAR/Spirochaetales_bacterium_SZUA-416_GCA_003245785.1.fas	§insdc.gca:GCA_003245785.1	§mmp.db:MMP09287964	Spirochaetia	Unclassified	§gtdb:GCA_003245785.1	Unclassified	Bacteria|Spirochaetota|Spirochaetia|Treponematales|Treponemataceae|Spiro-10|Spiro-10 sp003245785	Bacteria	Spirochaetales	Spirochaetales bacterium§taxonomy:2026792	Spirochaetes	Spirochaetales bacterium	SZUA-416	0	0	969	3099	0.312682	MarDB
GCA_002695155.1	/data2/marine_genomes_and_metagenomes/genomes_The_MAR_databases/prodigal_short/MAR/Marinobacter_sp._EAC713_GCA_002695155.1.fas	§insdc.gca:GCA_002695155.1	§mmp.db:MMP07619427	Gammaproteobacteria	Alteromonadaceae	§gtdb:GCF_002933295.1	Marinobacter	Bacteria|Proteobacteria|Gammaproteobacteria|Pseudomonadales|Oleiphilaceae|Marinobacter|Marinobacter flavimaris	Bacteria	Alteromonadales	Marinobacter sp.§taxonomy:50741	Proteobacteria	Unclassified	EAC-713	0	0	342	2850	0.12	MarDB
GCA_002364005.1	/data2/marine_genomes_and_metagenomes/genomes_The_MAR_databases/prodigal_short/MAR/Phycisphaerales_bacterium_UBA3190_GCA_002364005.1.fas	§insdc.gca:GCA_002364005.1	§mmp.db:MMP06451765	Phycisphaerae	Unclassified	§gtdb:GCA_002364005.1	Unclassified	Bacteria|Planctomycetota|Phycisphaerae|Phycisphaerales|SM1A02|UBA1924|UBA1924 sp002364005	Bacteria	Phycisphaerales	Phycisphaerales bacterium UBA3190§taxonomy:1951198	Planctomycetes	Unclassified	UBA3190	0	0	881	2950	0.298644	MarDB
GCA_002380285.1	/data2/marine_genomes_and_metagenomes/genomes_The_MAR_databases/prodigal_short/MAR/Sphingobium_yanoikuyae_UBA4196_GCA_002380285.1.fas	§insdc.gca:GCA_002380285.1	§mmp.db:MMP06455643	Alphaproteobacteria	Sphingomonadaceae	§gtdb:GCF_000315525.1	Sphingobium	Bacteria|Proteobacteria|Alphaproteobacteria|Sphingomonadales|Sphingomonadaceae|Sphingobium|Sphingobium yanoikuyae	Bacteria	Sphingomonadales	Sphingobium yanoikuyae§taxonomy:13690	Proteobacteria	Unclassified	UBA4196	0	0	632	4047	0.156165	MarDB
GCA_002721815.1	/data2/marine_genomes_and_metagenomes/genomes_The_MAR_databases/prodigal_short/MAR/Myxococcales_bacterium_SP234_GCA_002721815.1.fas	§insdc.gca:GCA_002721815.1	§mmp.db:MMP07619500	Deltaproteobacteria	Unclassified	§gtdb:GCA_002721815.1	Unclassified	Bacteria|Myxococcota|UBA727|UBA727|GCA-2721815|GCA-2721815|GCA-2721815 sp002721815	Bacteria	Myxococcales	Myxococcales bacterium§taxonomy:2026763	Proteobacteria	Unclassified	SP-234	0	0	534	3570	0.14958	MarDB
GCA_002707455.1	/data2/marine_genomes_and_metagenomes/genomes_The_MAR_databases/prodigal_short/MAR/Flavobacteriaceae_bacterium_SAT2804_GCA_002707455.1.fas	§insdc.gca:GCA_002707455.1	§mmp.db:MMP07619016	Flavobacteriia	Flavobacteriaceae	0	Unclassified	Bacteria|Bacteroidota|Bacteroidia|Flavobacteriales|Flavobacteriaceae|MAG-121220-bin8	Bacteria	Flavobacteriales	Flavobacteriaceae bacterium§taxonomy:1871037	Bacteroidetes	Unclassified	SAT-2804	0	0	167	876	0.190639	MarDB
GCA_003283745.1	/data2/marine_genomes_and_metagenomes/genomes_The_MAR_databases/prodigal_short/MAR/Prochlorococcus_sp._AG-315-B03_GCA_003283745.1.fas	§insdc.gca:GCA_003283745.1	§mmp.db:MMP08885968	Cyanobacteria (class)	Prochloraceae	§gtdb:GCA_003283745.1	Prochlorococcus	Bacteria|Cyanobacteria|Cyanobacteriia|Synechococcales|Cyanobiaceae|Prochlorococcus_B|Prochlorococcus_B sp003283745	Bacteria	Synechococcales	Prochlorococcus sp. AG-315-B03§taxonomy:2162427	Cyanobacteria	Prochlorococcus sp. AG-315-B03	AG-315-B03	0	0	983	1054	0.932638	MarDB
GCA_002732825.1	/data2/marine_genomes_and_metagenomes/genomes_The_MAR_databases/prodigal_short/MAR/Thalassobium_sp._NORP134_GCA_002732825.1.fas	§insdc.gca:GCA_002732825.1	§mmp.db:MMP07568948	Alphaproteobacteria	Rhodobacteraceae	§gtdb:GCA_002732825.1	Thalassobium	Bacteria|Proteobacteria|Alphaproteobacteria|Rhodobacterales|Rhodobacteraceae|GCA-2732825|GCA-2732825 sp002732825	Bacteria	Rhodobacterales	Thalassobium sp.§taxonomy:2030825	Proteobacteria	Unclassified	NORP134	0	0	720	2916	0.246914	MarDB
GCA_002695025.1	/data2/marine_genomes_and_metagenomes/genomes_The_MAR_databases/prodigal_short/MAR/Owenweeksia_sp._EAC74_GCA_002695025.1.fas	§insdc.gca:GCA_002695025.1	§mmp.db:MMP07619579	Flavobacteriia	Cryomorphaceae	§gtdb:GCA_002695025.1	Owenweeksia	Bacteria|Bacteroidota|Bacteroidia|Flavobacteriales|Cryomorphaceae|Owenweeksia|Owenweeksia sp002695025	Bacteria	Flavobacteriales	Owenweeksia sp.§taxonomy:2024847	Bacteroidetes	Unclassified	EAC-74	0	0	730	3892	0.187564	MarDB
GCA_001750625.1	/data2/marine_genomes_and_metagenomes/genomes_The_MAR_databases/prodigal_short/MAR/Betaproteobacteria_bacterium_AqS2_GCA_001750625.1.fas	§insdc.gca:GCA_001750625.1	§mmp.db:MMP04123283	Betaproteobacteria	Unclassified	§gtdb:GCA_001750625.1	Unclassified	Bacteria|Proteobacteria|Gammaproteobacteria|AqS2|AqS2|AqS2|AqS2 sp001750625	Bacteria	Unclassified	Betaproteobacteria bacterium AqS2§taxonomy:1732024	Proteobacteria	Unclassified	AqS2	0	0	1649	1649	1	MarDB
GCA_002434805.1	/data2/marine_genomes_and_metagenomes/genomes_The_MAR_databases/prodigal_short/MAR/Patescibacteria_group_bacterium_UBA6532_GCA_002434805.1.fas	§insdc.gca:GCA_002434805.1	§mmp.db:MMP06452187	Unclassified	Unclassified	§gtdb:GCA_002434805.1	Unclassified	Bacteria|Patescibacteria|Paceibacteria|Paceibacterales|UBA6532|UBA6532|UBA6532 sp002434805	Bacteria	Unclassified	Patescibacteria group bacterium UBA6532§taxonomy:1948854	Unclassified	Unclassified	UBA6532	0	0	40	576	0.0694444	MarDB
GCA_001303265.1	/data2/marine_genomes_and_metagenomes/genomes_The_MAR_databases/prodigal_short/MAR/Gemmatimonas_sp._SG8_17_GCA_001303265.1.fas	§insdc.gca:GCA_001303265.1	§mmp.db:MMP03994163	Gemmatimonadetes	Gemmatimonadaceae	0	Gemmatimonas	Bacteria|Gemmatimonadota|Gemmatimonadetes|Gemmatimonadales|GWC2-71-9	Bacteria	Gemmatimonadales	Gemmatimonas sp. SG8_17§taxonomy:1703355	Gemmatimonadetes	Unclassified	SG8_17	0	0	1023	3757	0.272292	MarDB
GCA_003215675.1	/data2/marine_genomes_and_metagenomes/genomes_The_MAR_databases/prodigal_short/MAR/Prochlorococcus_sp._AG-409-J11_GCA_003215675.1.fas	§insdc.gca:GCA_003215675.1	§mmp.db:MMP08886363	Cyanobacteria (class)	Prochloraceae	0	Prochlorococcus	Bacteria|Cyanobacteria|Cyanobacteriia|Synechococcales|Cyanobiaceae|AG-363-K07	Bacteria	Synechococcales	Prochlorococcus sp. AG-409-J11§taxonomy:2162485	Cyanobacteria	Prochlorococcus sp. AG-409-J11	AG-409-J11	0	0	647	676	0.957101	MarDB
GCA_002697965.1	/data2/marine_genomes_and_metagenomes/genomes_The_MAR_databases/prodigal_short/MAR/Acidimicrobiaceae_bacterium_NAT255_GCA_002697965.1.fas	§insdc.gca:GCA_002697965.1	§mmp.db:MMP07618170	Acidimicrobiia	Acidimicrobiaceae	§gtdb:GCA_002713545.1	Unclassified	Bacteria|Actinobacteriota|Acidimicrobiia|Microtrichales|MedAcidi-G1|MedAcidi-G1|MedAcidi-G1 sp002713545	Bacteria	Acidimicrobiales	Acidimicrobiaceae bacterium§taxonomy:2024894	Actinobacteria	Unclassified	NAT-255	0	0	737	1989	0.370538	MarDB
GCA_003648295.1	/data2/marine_genomes_and_metagenomes/genomes_The_MAR_databases/prodigal_short/MAR/Bacteroidetes_bacterium_B26_G6_GCA_003648295.1.fas	§insdc.gca:GCA_003648295.1	§mmp.db:MMP09215138	Unclassified	Unclassified	0	Unclassified	Bacteria|Bacteroidota|Bacteroidia|Cytophagales|Cyclobacteriaceae	Bacteria	Unclassified	Bacteroidetes bacterium§taxonomy:1898104	Bacteroidetes	Bacteroidetes bacterium	B26_G6	0	0	1273	2538	0.501576	MarDB
GCA_002367375.1	/data2/marine_genomes_and_metagenomes/genomes_The_MAR_databases/prodigal_short/MAR/Erythrobacter_sp._UBA3075_GCA_002367375.1.fas	§insdc.gca:GCA_002367375.1	§mmp.db:MMP06455128	Alphaproteobacteria	Erythrobacteraceae	§gtdb:GCA_002367375.1	Erythrobacter	Bacteria|Proteobacteria|Alphaproteobacteria|Sphingomonadales|Sphingomonadaceae|Erythrobacter_B|Erythrobacter_B sp002367375	Bacteria	Sphingomonadales	Erythrobacter sp. UBA3075§taxonomy:1946471	Proteobacteria	Unclassified	UBA3075	0	0	752	2506	0.30008	MarDB
GCA_002339205.1	/data2/marine_genomes_and_metagenomes/genomes_The_MAR_databases/prodigal_short/MAR/Halieaceae_bacterium_UBA2614_GCA_002339205.1.fas	§insdc.gca:GCA_002339205.1	§mmp.db:MMP06452323	Gammaproteobacteria	Halieaceae	§gtdb:GCA_002699145.1	Unclassified	Bacteria|Proteobacteria|Gammaproteobacteria|Pseudomonadales|Halieaceae|Halioglobus|Halioglobus sp002699145	Bacteria	Cellvibrionales	Halieaceae bacterium UBA2614§taxonomy:1951901	Proteobacteria	Unclassified	UBA2614	0	0	757	4116	0.183916	MarDB
GCA_002721435.1	/data2/marine_genomes_and_metagenomes/genomes_The_MAR_databases/prodigal_short/MAR/Marinobacter_sp._SP269_GCA_002721435.1.fas	§insdc.gca:GCA_002721435.1	§mmp.db:MMP07619434	Gammaproteobacteria	Alteromonadaceae	§gtdb:GCF_000831005.1	Marinobacter	Bacteria|Proteobacteria|Gammaproteobacteria|Pseudomonadales|Oleiphilaceae|Marinobacter|Marinobacter salarius	Bacteria	Alteromonadales	Marinobacter sp.§taxonomy:50741	Proteobacteria	Unclassified	SP-269	0	0	308	2910	0.105842	MarDB
GCA_001007635.1	/data2/marine_genomes_and_metagenomes/genomes_The_MAR_databases/prodigal_short/MAR/Candidatus_Synechococcus_spongiarum_15L_GCA_001007635.1.fas	§insdc.gca:GCA_001007635.1	§mmp.db:MMP03323802	Cyanobacteria (class)	Synechococcaceae	§gtdb:GCA_002018045.1	Synechococcus	Bacteria|Cyanobacteria|Cyanobacteriia|Synechococcales|Cyanobiaceae|Synechococcus_B|Synechococcus_B spongiarum_E	Bacteria	Synechococcales	Candidatus Synechococcus spongiarum 15L§taxonomy:1608419	Cyanobacteria	Candidatus Synechococcus spongiarum	15L	0	0	2339	2339	1	MarDB
GCA_002699485.1	/data2/marine_genomes_and_metagenomes/genomes_The_MAR_databases/prodigal_short/MAR/Chloroflexi_bacterium_NAT137_GCA_002699485.1.fas	§insdc.gca:GCA_002699485.1	§mmp.db:MMP07618452	Unclassified	Unclassified	§gtdb:GCA_002699485.1	Unclassified	Bacteria|Chloroflexota|Dehalococcoidia|SAR202|UBA2962|UBA2962|UBA2962 sp002699485	Bacteria	Unclassified	Chloroflexi bacterium§taxonomy:2026724	Chloroflexi	Unclassified	NAT-137	0	0	645	1947	0.331279	MarDB
GCA_003492055.1	/data2/marine_genomes_and_metagenomes/genomes_The_MAR_databases/prodigal_short/MAR/Cellvibrionales_bacterium_UBA10333_GCA_003492055.1.fas	§insdc.gca:GCA_003492055.1	§mmp.db:MMP08018220	Gammaproteobacteria	Unclassified	§gtdb:GCA_003492055.1	Unclassified	Bacteria|Proteobacteria|Gammaproteobacteria|Pseudomonadales|UBA7434|UBA7434|UBA7434 sp003492055	Bacteria	Cellvibrionales	Cellvibrionales bacterium§taxonomy:2026722	Proteobacteria	Cellvibrionales bacterium	UBA10333	0	0	535	1575	0.339683	MarDB
GCA_002692485.1	/data2/marine_genomes_and_metagenomes/genomes_The_MAR_databases/prodigal_short/MAR/Rickettsiales_bacterium_MED1003_GCA_002692485.1.fas	§insdc.gca:GCA_002692485.1	§mmp.db:MMP07620279	Alphaproteobacteria	Unclassified	0	Unclassified	Bacteria|Proteobacteria|Alphaproteobacteria|Pelagibacterales|AG-422-B15	Bacteria	Rickettsiales	Rickettsiales bacterium§taxonomy:2026788	Proteobacteria	Unclassified	MED-1003	0	0	531	763	0.695937	MarDB
GCA_002699105.1	/data2/marine_genomes_and_metagenomes/genomes_The_MAR_databases/prodigal_short/MAR/Ectothiorhodospiraceae_bacterium_NAT122_GCA_002699105.1.fas	§insdc.gca:GCA_002699105.1	§mmp.db:MMP07618691	Gammaproteobacteria	Ectothiorhodospiraceae	§gtdb:GCA_002699105.1	Unclassified	Bacteria|Bacteroidota|SZUA-365|SZUA-365|GCA-2699105|GCA-2699105|GCA-2699105 sp002699105	Bacteria	Chromatiales	Ectothiorhodospiraceae bacterium§taxonomy:2026737	Proteobacteria	Unclassified	NAT-122	0	0	1130	2828	0.399576	MarDB
GCA_002713165.1	/data2/marine_genomes_and_metagenomes/genomes_The_MAR_databases/prodigal_short/MAR/Verrucomicrobia_bacterium_SAT140_GCA_002713165.1.fas	§insdc.gca:GCA_002713165.1	§mmp.db:MMP07620178	Unclassified	Unclassified	§gtdb:GCA_002713165.1	Unclassified	Bacteria|Bacteroidota|Bacteroidia|Flavobacteriales|koll-22|UBA1494_A|UBA1494_A sp002713165	Bacteria	Unclassified	Verrucomicrobia bacterium§taxonomy:2026799	Verrucomicrobia	Unclassified	SAT-140	0	0	355	1646	0.215674	MarDB
GCA_002500535.1	/data2/marine_genomes_and_metagenomes/genomes_The_MAR_databases/prodigal_short/MAR/Candidatus_Microthrix_sp._UBA7903_GCA_002500535.1.fas	§insdc.gca:GCA_002500535.1	§mmp.db:MMP06456421	Acidimicrobiia	Microthrixaceae	§gtdb:GCA_002365325.1	Unclassified	Bacteria|Actinobacteriota|Acidimicrobiia|Microtrichales|MedAcidi-G1|UBA3125|UBA3125 sp002365325	Bacteria	Acidimicrobiales	Candidatus Microthrix sp. UBA7903§taxonomy:1946217	Actinobacteria	Unclassified	UBA7903	0	0	765	1958	0.390705	MarDB
GCA_002271865.1	/data2/marine_genomes_and_metagenomes/genomes_The_MAR_databases/prodigal_short/MAR/Alteromonas_macleodii_Amac816_GCA_002271865.1.fas	§insdc.gca:GCA_002271865.1	§mmp.db:MMP05374556	Gammaproteobacteria	Alteromonadaceae	§gtdb:GCF_000172635.2	Alteromonas	Bacteria|Proteobacteria|Gammaproteobacteria|Enterobacterales|Alteromonadaceae|Alteromonas|Alteromonas macleodii	Bacteria	Alteromonadales	Alteromonas macleodii§taxonomy:28108	Proteobacteria	Unclassified	Amac816	0	0	669	4299	0.155618	MarDB
GCA_002478725.1	/data2/marine_genomes_and_metagenomes/genomes_The_MAR_databases/prodigal_short/MAR/Saccharospirillaceae_bacterium_UBA7437_GCA_002478725.1.fas	§insdc.gca:GCA_002478725.1	§mmp.db:MMP06453936	Gammaproteobacteria	Saccharospirillaceae	§gtdb:GCF_002795845.1	Unclassified	Bacteria|Proteobacteria|Gammaproteobacteria|Pseudomonadales|Saccharospirillaceae|Reinekea|Reinekea forsetii	Bacteria	Oceanospirillales	Saccharospirillaceae bacterium UBA7437§taxonomy:1953074	Proteobacteria	Unclassified	UBA7437	0	0	529	2600	0.203462	MarDB
GCA_003280005.1	/data2/marine_genomes_and_metagenomes/genomes_The_MAR_databases/prodigal_short/MAR/Pelagibacteraceae_bacterium_AG-365-D07_GCA_003280005.1.fas	§insdc.gca:GCA_003280005.1	§mmp.db:MMP08886266	Alphaproteobacteria	Pelagibacteraceae	§gtdb:GCA_003280005.1	Unclassified	Bacteria|Proteobacteria|Alphaproteobacteria|Pelagibacterales|Pelagibacteraceae|Pelagibacter|Pelagibacter sp003280005	Bacteria	Pelagibacterales	Pelagibacteraceae bacterium AG-365-D07§taxonomy:2162041	Proteobacteria	Pelagibacteraceae bacterium AG-365-D07	AG-365-D07	0	0	264	1116	0.236559	MarDB
GCA_003648565.1	/data2/marine_genomes_and_metagenomes/genomes_The_MAR_databases/prodigal_short/MAR/Bacteroidetes_bacterium_B2_G6_GCA_003648565.1.fas	§insdc.gca:GCA_003648565.1	§mmp.db:MMP09215131	Unclassified	Unclassified	0	Unclassified	Bacteria|Bacteroidota|Bacteroidia|Bacteroidales|NBLH01|NBLH01	Bacteria	Unclassified	Bacteroidetes bacterium§taxonomy:1898104	Bacteroidetes	Bacteroidetes bacterium	B2_G6	0	0	1292	4531	0.285147	MarDB
GCA_003230495.1	/data2/marine_genomes_and_metagenomes/genomes_The_MAR_databases/prodigal_short/MAR/Candidatus_Woesebacteria_bacterium_SZUA-208_GCA_003230495.1.fas	§insdc.gca:GCA_003230495.1	§mmp.db:MMP09240192	Unclassified	Unclassified	0	Unclassified	Bacteria|Patescibacteria|Microgenomatia|GWA2-44-7|UBA8517	Bacteria	Unclassified	Candidatus Woesebacteria bacterium§taxonomy:2026804	Candidatus Woesebacteria	Candidatus Woesebacteria bacterium	SZUA-208	0	0	381	1144	0.333042	MarDB
GCA_002730315.1	/data2/marine_genomes_and_metagenomes/genomes_The_MAR_databases/prodigal_short/MAR/Candidatus_Marinimicrobia_bacterium_NP141_GCA_002730315.1.fas	§insdc.gca:GCA_002730315.1	§mmp.db:MMP07619373	Unclassified	Unclassified	§gtdb:GCA_002730315.1	Unclassified	Bacteria|Marinisomatota|Marinisomatia|Marinisomatales|TCS55|UBA2126|UBA2126 sp002730315	Bacteria	Unclassified	Candidatus Marinimicrobia bacterium§taxonomy:2026760	Unclassified	Unclassified	NP-141	0	0	659	1257	0.524264	MarDB
GCA_003230225.1	/data2/marine_genomes_and_metagenomes/genomes_The_MAR_databases/prodigal_short/MAR/Chromatiales_bacterium_SZUA-122_GCA_003230225.1.fas	§insdc.gca:GCA_003230225.1	§mmp.db:MMP09240106	Gammaproteobacteria	Unclassified	0	Unclassified	Bacteria|Proteobacteria|Gammaproteobacteria|SZUA-140|SZUA-140|SZUA-76	Bacteria	Chromatiales	Chromatiales bacterium§taxonomy:2026725	Proteobacteria	Chromatiales bacterium	SZUA-122	0	0	581	1469	0.395507	MarDB
GCA_002716865.1	/data2/marine_genomes_and_metagenomes/genomes_The_MAR_databases/prodigal_short/MAR/Dehalococcoidia_bacterium_SP4044_GCA_002716865.1.fas	§insdc.gca:GCA_002716865.1	§mmp.db:MMP07618652	Dehalococcoidia	Unclassified	0	Unclassified	Bacteria|Chloroflexota|Dehalococcoidia|UBA1151|TMED-70|GCA-002700125	Bacteria	Unclassified	Dehalococcoidia bacterium§taxonomy:2026734	Chloroflexi	Unclassified	SP-4044	0	0	696	1334	0.521739	MarDB
GCA_002720915.1	/data2/marine_genomes_and_metagenomes/genomes_The_MAR_databases/prodigal_short/MAR/Opitutales_bacterium_SP2995_GCA_002720915.1.fas	§insdc.gca:GCA_002720915.1	§mmp.db:MMP07619578	Opitutae	Unclassified	0	Unclassified	Bacteria|Verrucomicrobiota|Verrucomicrobiae|Opitutales|Puniceicoccaceae|BACL24	Bacteria	Opitutales	Opitutales bacterium§taxonomy:2026772	Verrucomicrobia	Unclassified	SP-2995	0	0	1171	1171	1	MarDB
GCA_003505075.1	/data2/marine_genomes_and_metagenomes/genomes_The_MAR_databases/prodigal_short/MAR/Halomonas_sp._UBA8247_GCA_003505075.1.fas	§insdc.gca:GCA_003505075.1	§mmp.db:MMP08018892	Gammaproteobacteria	Halomonadaceae	§gtdb:GCF_900110265.1	Halomonas	Bacteria|Proteobacteria|Gammaproteobacteria|Pseudomonadales|Halomonadaceae|Halomonas|Halomonas aquamarina	Bacteria	Oceanospirillales	Halomonas sp.§taxonomy:1486246	Proteobacteria	Halomonas sp.	UBA8247	0	0	740	3192	0.23183	MarDB
GCA_003211595.1	/data2/marine_genomes_and_metagenomes/genomes_The_MAR_databases/prodigal_short/MAR/Pelagibacteraceae_bacterium_AG-470-G06_GCA_003211595.1.fas	§insdc.gca:GCA_003211595.1	§mmp.db:MMP08886577	Alphaproteobacteria	Pelagibacteraceae	0	Unclassified	Bacteria|Proteobacteria|Alphaproteobacteria|Pelagibacterales|Pelagibacteraceae|HIMB114	Bacteria	Pelagibacterales	Pelagibacteraceae bacterium AG-470-G06§taxonomy:2162010	Proteobacteria	Pelagibacteraceae bacterium AG-470-G06	AG-470-G06	0	0	370	516	0.717054	MarDB
GCA_003535145.1	/data2/marine_genomes_and_metagenomes/genomes_The_MAR_databases/prodigal_short/MAR/Rhodobacteraceae_bacterium_UBA10399_GCA_003535145.1.fas	§insdc.gca:GCA_003535145.1	§mmp.db:MMP08019156	Alphaproteobacteria	Rhodobacteraceae	§gtdb:GCA_002336405.1	Unclassified	Bacteria|Proteobacteria|Alphaproteobacteria|Rhodobacterales|Rhodobacteraceae|HIMB11|HIMB11 sp002336405	Bacteria	Rhodobacterales	Rhodobacteraceae bacterium§taxonomy:1904441	Proteobacteria	Rhodobacteraceae bacterium	UBA10399	0	0	999	4482	0.222892	MarDB
GCA_002117855.1	/data2/marine_genomes_and_metagenomes/genomes_The_MAR_databases/prodigal_short/MAR/Bacillus_cereus_29_GCA_002117855.1.fas	§insdc.gca:GCA_002117855.1	§mmp.db:MMP06554796	Bacilli	Bacillaceae	§gtdb:GCF_000007825.1	Bacillus	Bacteria|Firmicutes|Bacilli|Bacillales|Bacillaceae_G|Bacillus_A|Bacillus_A cereus	Bacteria	Bacillales	Bacillus cereus§taxonomy:1396	Firmicutes	Unclassified	Myxococcales§taxonomy:29	0	0	340	5227	0.0650469	MarDB
GCA_002376875.1	/data2/marine_genomes_and_metagenomes/genomes_The_MAR_databases/prodigal_short/MAR/Opitutae_bacterium_UBA3534_GCA_002376875.1.fas	§insdc.gca:GCA_002376875.1	§mmp.db:MMP06455295	Opitutae	Unclassified	§gtdb:GCA_002376875.1	Unclassified	Bacteria|Verrucomicrobiota|Verrucomicrobiae|Opitutales|UBA3534|UBA3534|UBA3534 sp002376875	Bacteria	Unclassified	Opitutae bacterium UBA3534§taxonomy:1948719	Verrucomicrobia	Unclassified	UBA3534	0	0	1543	1682	0.91736	MarDB
GCA_003251495.1	/data2/marine_genomes_and_metagenomes/genomes_The_MAR_databases/prodigal_short/MAR/Sulfuricurvum_sp._SZUA-496_GCA_003251495.1.fas	§insdc.gca:GCA_003251495.1	§mmp.db:MMP09288044	Epsilonproteobacteria	Helicobacteraceae	0	Sulfuricurvum	Bacteria|Campylobacterota|Campylobacteria|Campylobacterales|Sulfurimonadaceae|SZUA-415	Bacteria	Campylobacterales	Sulfuricurvum sp.§taxonomy:2025608	Proteobacteria	Sulfuricurvum sp.	SZUA-496	0	0	692	1894	0.365364	MarDB
GCA_002685815.1	/data2/marine_genomes_and_metagenomes/genomes_The_MAR_databases/prodigal_short/MAR/Dehalococcoidales_bacterium_ARS79_GCA_002685815.1.fas	§insdc.gca:GCA_002685815.1	§mmp.db:MMP07618621	Dehalococcoidia	Unclassified	§gtdb:GCA_002685815.1	Unclassified	Bacteria|Chloroflexota|Dehalococcoidia|Dehalococcoidales|UBA2162|GCA-2685815|GCA-2685815 sp002685815	Bacteria	Dehalococcoidales	Dehalococcoidales bacterium§taxonomy:2026733	Chloroflexi	Unclassified	ARS-79	0	0	226	1396	0.161891	MarDB
GCA_001657395.1	/data2/marine_genomes_and_metagenomes/genomes_The_MAR_databases/prodigal_short/MAR/Rhodospirillales_bacterium_BBD_1991-14_GCA_001657395.1.fas	§insdc.gca:GCA_001657395.1	§mmp.db:MMP04939355	Alphaproteobacteria	Unclassified	§gtdb:GCA_001657395.1	Unclassified	Bacteria|Proteobacteria|Alphaproteobacteria|Kiloniellales|Kiloniellaceae|BBD-1991-14|BBD-1991-14 sp001657395	Bacteria	Rhodospirillales	Rhodospirillales bacterium BBD 1991-14§taxonomy:1852621	Proteobacteria	Unclassified	BBD 1991-14	0	0	754	5148	0.146465	MarDB
GCA_003250315.1	/data2/marine_genomes_and_metagenomes/genomes_The_MAR_databases/prodigal_short/MAR/Desulfobulbus_propionicus_SZUA-535_GCA_003250315.1.fas	§insdc.gca:GCA_003250315.1	§mmp.db:MMP09288083	Deltaproteobacteria	Desulfobulbaceae	0	Desulfobulbus	Bacteria|Desulfobacterota|Desulfobulbia|Desulfobulbales|Desulfobulbaceae|Desulfobulbus	Bacteria	Desulfobacterales	Desulfobulbus propionicus§taxonomy:894	Proteobacteria	Desulfobulbus propionicus	SZUA-535	0	0	714	1961	0.3641	MarDB
[truncated: 12,406 more rows]

## Sheet: Supplementary Data 12
project	accession	type
Malaspina expedition	SRR3968777	metagenome
Malaspina expedition	SRR3968770	metagenome
Malaspina expedition	SRR3967905	metagenome
Malaspina expedition	SRR3968061	metagenome
Malaspina expedition	SRR3968063	metagenome
Malaspina expedition	SRR3968062	metagenome
[truncated: 427 more rows]

## Sheet: Supplementary Data 13
genome	Cluster	Protein	Type	Subclass	precursor	Leader	Core	sequence	DL predicted class
[truncated: 3,013 more rows]

[truncated: 6 more sheets: Supplementary Data 14, Supplementary Data 15, Supplementary Data 16, Supplementary Data 17, Supplementary Data 18, Supplementary Data 19]
